# Supplementary material for: Two Plasmodium vivax hypnozoite-expressed RNA-binding proteins inhibit liver stage replication
Source: Research Square preprint supplement (doi:10.21203/rs.3.rs-8080228/v1), 2025-11-28
Supplement: Supplementary file 1 [file 1a3a563ca310c367cffa7043.xlsx]

## Sheet: Table S1
Primer Name	Primer Sequence (5'-3')	Vector/Target
HindIII-PyP230p 5'flank-F1	CTCATCAAGCTTGAAGATTTTATCATTATTCGAG	Construction of the pUIS4 vector containing the P230p 5′ and 3′ flanking regions and the PyUIS4 5′ and 3′ UTRs
AscI-PyP230p 5'flank-R1	CTCATCGGCGCGCCGGTTAGTGGATATGATCCAT
Sa1I-PyP230 3'flank-F1	CTCATCGTCGACGACTGATTATAGAAGAGCAATTA
NotI-PyP230 3'flank-R2	CTCATC GCGGCCGCGAAGTTTGATTCTTAATTCC
NheI-PyUIS4 3'UTR-F1	TATATACGCGTTGCTAGCCATTATGAGGGTAATTCAGAAAGAGAAC
Sa1I-PyUIS4 3'UTR-R1	ATA TAGCGG CCG CCA GGT TTG CAT ATA CGG CTG TTT TC
PUIS4 5'UTR-F1	TATATGGCGCGCCTTTTTCTTTTAATGTATTAATTAGTGTAATAATTTTGTAAAAACTTTATTCATTTATTTATTTTCCGTACTACATTG
PyUIS4 5'UTR-R1	ATA TAG TCG ACA GTT TAA ACT TTA TTC AGA TGT AAT TAT GTA CTA AAG GGT ATA TAT GTA GTC AAT ATC GAT C
PyP230-mid ORF-Guide F	tattGAATGTGGTGTAACAAATGG	Construction of the pUIS4 vector containing the PyP230p 5′ and 3′ flanking regions and an sgRNA targeting the middle of the PyP230p ORF
PyP230-mid ORF-Guide R	aaacCCATTTGTTACACCACATTC
KpnI-linker-mNeon-F1	CTCATCGGTACCGGGGGAGGTGGCTCCATGGTTAGTAAAGGAGAAGAA	Construction of the pUIS4-mNeon vector
NheI-mNeon-R1	CTCATCGCTAGCTTACATCATATCTGTAAATGCTTTTTGCCATTC
PyP230p 5'flank-Scr-F1	CCTCCATATAGCAATAAAACAGGGGATC	For clonal line screening of the uis4-PvIESI-1-mNeon, uis4-PvIESI-2-mNeon, uis4-PvIESI-1, uis4-PvIESI-2, and uis4-mNeon parasite lines.
PyP230p 3'flank-Scr-R1	GGTATAACATCTGTTATGCTTGATACACTTTGC
PvIESI-1-ORF-Scr-F1	TGGAGATCTTCAACAAGTTC
PvIESI-2- ORF-Scr-F1	GACGGAGCATTTTGTGTTGA
PyUSI4 5'UTRmid-Scr-R1	GTCAATGGTAATATCCGCATGTATCC
mNeon-Scr-F1:	GAACCAACCAATGTATGTATTTCGCAAAAC
PvIESI-1-qPCR-F1	GCTTATGAACGAGGACGATCAG	For RT-qPCR analysis to quantify PvIESI-1 and PvIESI-2 transcript levels.
PvIESI-1-qPCR-R1	CCTTACCTACTCCAGCCATTTC
PvIESI-2-qPCR-F1	CAAGACGGCAAAGAGGACTATC
PvIESI-2-qPCR-R1	CACACTCTCTATCGGTCCATTTC
Py18s rRNA-F1	GGAAGTTTAAGGCAACAACAGG
Py18s rRNA-R1	CACCCACGCGCAGATATAA
