# Supplementary material for: Two Plasmodium vivax hypnozoite-expressed RNA-binding proteins inhibit liver stage replication
Source: Research Square preprint supplement (doi:10.21203/rs.3.rs-8080228/v1), 2025-11-28
Supplement: Supplementary file 2 [file 2c17d821d5e8e527358ca33d.xlsx]

## Sheet: Read me
Supplementary file
IESI1_all_occurences or IESI2_all_occurences tabs list all IESI-1 and 2 preferred motif locations in the P. vivax P01 transcriptomes
Streme_results_Gural_hypnozoite and Streme_results_Gural_schizont tabs list all enriched motifs identified by STREME in the liver schizont or mixed population (hypnozoite containing) differentially expressed transcripts (P<0.05, log2FC>1)
Gural_transcripts_motifs tab lists all occurences of IESI-1 and 2 motifs in the differentially expressed transcripts
GO_enrichment_IESI1 lists GO enrichment results obtained for transcripts enriched (P<0.05) in liver stage schizonts containing the IESI-1 motif
GO_enrichment_IESI2 lists GO enrichment results obtained for transcripts enriched (P<0.05) in mixed population (shcizonts+hypnozoites) containing the IESI-2 motif

## Sheet: IESI1_all_occurences
Gene_ID	#Exons	5'UTR	3'UTR	Intron	Exon
PVP01_1301600	34	0	0	1	1
PVP01_1448100	28	0	0	1	1
PVP01_0604700	24	0	0	0	1
PVP01_1244300	23	0	0	0	1
PVP01_1344200	22	0	0	1	1
PVP01_0923200	21	0	0	1	1
PVP01_1145100	20	0	0	0	1
PVP01_0927400	20	1	0	1	0
PVP01_1124700	20	0	0	1	1
PVP01_1216700	20	0	1	1	0
PVP01_0821700	18	0	0	0	1
PVP01_1253800	18	0	0	0	1
PVP01_0919300	18	1	0	0	1
PVP01_1317100	18	0	0	1	1
PVP01_0707000	18	0	0	1	1
PVP01_0514500	17	0	0	0	1
PVP01_1447100	17	0	0	0	1
PVP01_1450900	17	0	1	0	0
PVP01_1202200	16	0	0	0	1
PVP01_1227300	16	0	1	0	0
PVP01_1269300	16	0	0	0	1
PVP01_1320100	16	0	1	0	0
PVP01_1141900	16	1	0	1	0
PVP01_0416700	16	1	1	0	1
PVP01_0724800	16	0	1	1	1
PVP01_0928200	15	0	0	0	1
PVP01_1242900	15	0	0	0	1
PVP01_1258800	15	0	0	0	1
PVP01_1346800	15	0	0	0	1
PVP01_1345400	15	0	0	1	1
PVP01_0116600	15	0	1	1	1
PVP01_0410000	15	0	1	1	1
PVP01_1113000	15	0	1	1	1
PVP01_0109300	14	0	1	0	0
PVP01_0704100	14	0	0	0	1
PVP01_0818000	14	0	0	0	1
PVP01_1130500	14	0	0	0	1
PVP01_1262900	14	0	0	0	1
PVP01_0824800	14	0	0	1	1
PVP01_1111400	14	0	0	1	1
PVP01_1207200	14	0	0	1	1
PVP01_1453900	14	0	0	1	1
PVP01_1241100	13	0	0	0	1
PVP01_0915800	13	1	0	0	0
PVP01_1416900	13	1	0	0	0
PVP01_1126400	13	0	0	0	1
PVP01_0613100	13	1	0	1	0
PVP01_0610600	13	0	0	1	1
PVP01_0904300	13	0	0	1	1
PVP01_1231700	13	0	0	1	1
PVP01_0306000	12	0	0	0	1
PVP01_0411300	12	0	0	0	1
PVP01_1023200	12	0	0	0	1
PVP01_1335200	12	0	0	0	1
PVP01_1462600	12	1	0	0	1
PVP01_1110500	12	0	0	1	1
PVP01_1243700	12	0	0	1	1
PVP01_1329300	12	0	0	1	1
PVP01_0621600	12	0	1	1	1
PVP01_1240800	12	0	1	1	1
PVP01_1255700	12	0	1	1	1
PVP01_0610700	11	0	0	0	1
PVP01_1205800	11	0	0	0	1
PVP01_0210900	11	0	1	0	0
PVP01_0313800	11	0	0	0	1
PVP01_0606000	11	0	0	0	1
PVP01_0814900	11	0	0	0	1
PVP01_0915000	11	0	1	0	0
PVP01_0942200	11	0	0	1	0
PVP01_1005300	11	0	0	0	1
PVP01_1121200	11	0	1	0	0
PVP01_1209800	11	0	1	0	0
PVP01_1215900	11	0	0	0	1
PVP01_1105200	11	1	0	0	1
PVP01_0946600	11	0	0	1	1
PVP01_1345800	11	0	0	1	1
PVP01_1448200	11	0	0	1	1
PVP01_0206200	11	1	0	1	1
PVP01_1337900	10	0	0	0	1
PVP01_0936800	10	1	0	0	0
PVP01_0114300	10	0	0	0	1
PVP01_0519000	10	0	0	0	1
PVP01_0528400	10	1	0	0	0
PVP01_0727900	10	0	0	0	1
PVP01_0734500	10	0	0	0	1
PVP01_0822400	10	0	0	0	1
PVP01_1011600	10	0	0	0	1
PVP01_1119500	10	0	0	0	1
PVP01_1130600	10	0	0	0	1
PVP01_1139400	10	0	0	0	1
PVP01_1223500	10	0	0	0	1
PVP01_1437200	10	0	0	0	1
PVP01_1463400	10	0	0	0	1
PVP01_1018300	10	1	0	0	1
PVP01_1317600	10	1	0	0	1
PVP01_0311200	10	0	1	0	1
PVP01_0702700	10	0	0	1	1
PVP01_0721200	10	0	1	0	1
PVP01_1241200	10	0	0	1	1
PVP01_0907900	10	1	0	1	1
PVP01_0913800	10	1	0	1	1
PVP01_1304700	10	1	1	0	1
PVP01_1123400	9	0	0	0	1
PVP01_0305000	9	1	0	0	0
PVP01_0622700	9	1	0	0	0
PVP01_0905600	9	1	0	0	0
PVP01_0206600	9	0	1	0	0
PVP01_0303600	9	0	0	0	1
PVP01_0304600	9	0	0	0	1
PVP01_0808000	9	0	0	0	1
PVP01_0815800	9	0	0	0	1
PVP01_0906600	9	0	0	0	1
PVP01_0913700	9	0	1	0	0
PVP01_0915400	9	0	0	0	1
PVP01_1029100	9	0	0	0	1
PVP01_1111100	9	0	1	0	0
PVP01_1133700	9	0	0	0	1
PVP01_1232400	9	0	0	0	1
PVP01_1238800	9	0	0	0	1
PVP01_1252000	9	0	0	0	1
PVP01_1313800	9	0	0	0	1
PVP01_1346100	9	0	0	0	1
PVP01_1405700	9	0	0	0	1
PVP01_1422300	9	0	0	0	1
PVP01_1422400	9	0	0	0	1
PVP01_1431200	9	0	0	0	1
PVP01_1249900	9	0	1	1	0
PVP01_1422800	9	0	0	1	1
PVP01_0947300	9	1	0	0	1
PVP01_1021500	9	1	0	0	1
PVP01_1251000	9	1	0	1	0
PVP01_1439600	9	1	1	0	0
PVP01_1461900	9	1	0	0	1
PVP01_0106300	9	0	1	0	1
PVP01_0306200	9	0	0	1	1
PVP01_0313400	9	0	0	1	1
PVP01_0527400	9	0	0	1	1
PVP01_0731900	9	0	1	1	0
PVP01_0916500	9	0	0	1	1
PVP01_1004500	9	0	0	1	1
PVP01_1004900	9	0	0	1	1
PVP01_1218200	9	0	1	1	0
PVP01_1403300	9	0	0	1	1
PVP01_0113400	9	1	1	0	1
PVP01_1225100	9	1	0	1	1
PVP01_0812100	9	0	1	1	1
PVP01_0308000	8	0	0	0	1
PVP01_0608800	8	0	0	0	1
PVP01_0618900	8	0	1	0	0
PVP01_0907600	8	0	0	0	1
PVP01_1437600	8	0	0	0	1
PVP01_0208000	8	1	0	0	0
PVP01_0706800	8	1	0	0	0
PVP01_0946800	8	1	0	0	0
PVP01_1319200	8	1	0	0	0
PVP01_0602600	8	0	0	0	1
PVP01_0720500	8	0	0	0	1
PVP01_0806700	8	0	0	0	1
PVP01_0819500	8	0	0	0	1
PVP01_0826100	8	0	0	0	1
PVP01_0836800	8	0	1	0	0
PVP01_0908000	8	0	0	0	1
PVP01_0915500	8	0	0	0	1
PVP01_1007900	8	0	0	0	1
PVP01_1012800	8	0	0	0	1
PVP01_1030300	8	0	0	0	1
PVP01_1106400	8	0	0	0	1
PVP01_1122300	8	0	1	0	0
PVP01_1136900	8	0	0	0	1
PVP01_1202600	8	0	0	0	1
PVP01_1204800	8	0	0	0	1
PVP01_1230100	8	0	0	0	1
PVP01_1247200	8	0	0	0	1
PVP01_1254300	8	0	0	0	1
PVP01_1264500	8	0	0	0	1
PVP01_1301300	8	0	0	0	1
PVP01_1325800	8	0	0	0	1
PVP01_1342800	8	0	0	0	1
PVP01_1464900	8	0	0	0	1
PVP01_1469200	8	0	0	0	1
PVP01_0415200	8	0	0	1	1
PVP01_0104800	8	1	0	0	1
PVP01_0415600	8	1	1	0	0
PVP01_0619600	8	1	1	0	0
PVP01_0806600	8	1	0	0	1
PVP01_0937400	8	1	0	1	0
PVP01_1130900	8	1	0	1	0
PVP01_1133500	8	1	0	0	1
PVP01_1401400	8	1	0	0	1
PVP01_0314300	8	0	0	1	1
PVP01_0413600	8	0	1	1	0
PVP01_0521000	8	0	1	0	1
PVP01_0616500	8	0	1	0	1
PVP01_0703800	8	0	0	1	1
PVP01_0729000	8	0	1	0	1
PVP01_1005400	8	0	0	1	1
PVP01_1032400	8	0	0	1	1
PVP01_1206100	8	0	0	1	1
PVP01_1217600	8	0	0	1	1
PVP01_1435900	8	0	1	1	0
PVP01_1449200	8	0	0	1	1
PVP01_1468100	8	1	0	1	0
PVP01_1005700	8	1	0	1	1
PVP01_0203400	8	0	1	1	1
PVP01_1133900	8	0	1	1	1
PVP01_0511900	7	0	0	0	1
PVP01_0606600	7	1	0	0	0
PVP01_0610200	7	1	0	0	0
PVP01_0917500	7	1	0	0	0
PVP01_0925700	7	1	0	0	0
PVP01_1269500	7	1	0	0	0
PVP01_0110400	7	0	0	0	1
PVP01_0305700	7	0	0	0	1
PVP01_0306500	7	0	1	0	0
PVP01_0309200	7	0	0	0	1
PVP01_0314000	7	0	0	0	1
PVP01_0314900	7	0	0	0	1
PVP01_0407400	7	0	0	0	1
PVP01_0505300	7	0	0	0	1
PVP01_0531300	7	0	0	0	1
PVP01_0608600	7	0	1	0	0
PVP01_0617500	7	0	0	0	1
PVP01_0619000	7	0	1	0	0
PVP01_0702500	7	0	0	0	1
PVP01_0704600	7	0	0	0	1
PVP01_0710900	7	0	0	0	1
PVP01_0814100	7	0	0	0	1
PVP01_0826400	7	0	0	0	1
PVP01_0830400	7	0	0	0	1
PVP01_0832500	7	0	0	0	1
PVP01_0907100	7	0	0	0	1
PVP01_0915900	7	0	0	0	1
PVP01_0919400	7	0	0	0	1
PVP01_0923000	7	0	0	0	1
PVP01_0927700	7	0	1	0	0
PVP01_0931300	7	0	0	0	1
PVP01_0937600	7	0	0	0	1
PVP01_0939800	7	0	0	0	1
PVP01_0940200	7	0	0	0	1
PVP01_0942500	7	0	0	0	1
PVP01_1114700	7	0	0	0	1
PVP01_1143300	7	0	0	0	1
PVP01_1207800	7	0	1	0	0
PVP01_1234000	7	0	0	0	1
PVP01_1257900	7	0	0	0	1
PVP01_1303200	7	0	1	0	0
PVP01_1320900	7	0	0	0	1
PVP01_1321300	7	0	1	0	0
PVP01_1322000	7	0	0	0	1
PVP01_1324000	7	0	0	0	1
PVP01_1338100	7	0	0	0	1
PVP01_1407200	7	0	0	0	1
PVP01_1418500	7	0	0	0	1
PVP01_1440700	7	0	0	0	1
PVP01_0415400	7	1	1	0	0
PVP01_0707800	7	1	0	0	1
PVP01_0819000	7	1	0	1	0
PVP01_1336000	7	1	1	0	0
PVP01_0522500	7	0	1	0	1
PVP01_0529300	7	0	0	1	1
PVP01_0802200	7	0	0	1	1
PVP01_0831200	7	0	0	1	1
PVP01_1111700	7	0	1	0	1
PVP01_1245300	7	0	0	1	1
PVP01_1268600	7	0	1	0	1
PVP01_1308800	7	0	0	1	1
PVP01_1338800	7	0	1	0	1
PVP01_1417700	7	0	0	1	1
PVP01_1459400	7	0	0	1	1
PVP01_0204500	7	1	0	1	1
PVP01_1254400	7	1	0	1	1
PVP01_1437400	7	0	1	1	1
PVP01_1404600	6	0	0	0	1
PVP01_0421700	6	1	0	0	0
PVP01_0712800	6	1	0	0	0
PVP01_0905500	6	1	0	0	0
PVP01_1013300	6	1	0	0	0
PVP01_1207500	6	1	0	0	0
PVP01_1224200	6	1	0	0	0
PVP01_1242000	6	1	0	0	0
PVP01_1433300	6	1	0	0	0
PVP01_0115100	6	0	0	0	1
PVP01_0204300	6	0	0	0	1
PVP01_0303000	6	0	0	0	1
PVP01_0307000	6	0	0	0	1
PVP01_0413700	6	0	0	0	1
PVP01_0527900	6	0	1	0	0
PVP01_0530200	6	0	0	0	1
PVP01_0607500	6	0	0	0	1
PVP01_0708600	6	0	0	0	1
PVP01_0719700	6	0	0	0	1
PVP01_0800900	6	0	0	0	1
PVP01_0810500	6	0	0	0	1
PVP01_0812000	6	0	0	0	1
PVP01_0931400	6	0	0	0	1
PVP01_0941600	6	0	0	0	1
PVP01_0944400	6	0	0	0	1
PVP01_0947700	6	0	1	0	0
PVP01_1004400	6	0	0	0	1
PVP01_1012000	6	0	0	0	1
PVP01_1012100	6	0	0	0	1
PVP01_1017500	6	0	0	0	1
PVP01_1018500	6	0	1	0	0
PVP01_1028100	6	0	1	0	0
PVP01_1103600	6	0	1	0	0
PVP01_1110800	6	0	0	0	1
PVP01_1119800	6	0	0	0	1
PVP01_1203700	6	0	1	0	0
PVP01_1233500	6	0	0	0	1
PVP01_1234700	6	0	0	0	1
PVP01_1241000	6	0	0	0	1
PVP01_1256500	6	0	0	0	1
PVP01_1267300	6	0	0	0	1
PVP01_1301900	6	0	0	0	1
PVP01_1306400	6	0	0	0	1
PVP01_1315500	6	0	1	0	0
PVP01_1321900	6	0	0	0	1
PVP01_1331200	6	0	0	0	1
PVP01_1341400	6	0	0	0	1
PVP01_1405600	6	0	0	0	1
PVP01_1411600	6	0	0	0	1
PVP01_1416300	6	0	0	0	1
PVP01_1426200	6	0	0	0	1
PVP01_1439100	6	0	0	0	1
PVP01_1449300	6	0	1	0	0
PVP01_1462000	6	0	0	0	1
PVP01_0004140	6	0	0	0	1
PVP01_0003320	6	0	0	0	1
PVP01_0316200	6	1	0	1	0
PVP01_0316400	6	1	0	0	1
PVP01_0530000	6	1	1	0	0
PVP01_0916900	6	1	1	0	0
PVP01_0945700	6	1	0	0	1
PVP01_1132000	6	1	0	0	1
PVP01_1304000	6	1	0	1	0
PVP01_0107500	6	0	0	1	1
PVP01_0206400	6	0	1	0	1
PVP01_0527100	6	0	0	1	1
PVP01_0616600	6	0	0	1	1
PVP01_0722400	6	0	1	0	1
PVP01_0804300	6	0	0	1	1
PVP01_0921200	6	0	0	1	1
PVP01_0923400	6	0	1	0	1
PVP01_1013800	6	0	1	0	1
PVP01_1020500	6	0	0	1	1
PVP01_1021300	6	0	1	1	0
PVP01_1103700	6	0	1	1	0
PVP01_1124800	6	0	1	0	1
PVP01_1241500	6	0	0	1	1
PVP01_1266800	6	1	0	0	1
PVP01_1445000	6	0	0	1	1
PVP01_1456800	6	1	0	1	0
PVP01_1464100	6	0	0	1	1
PVP01_1467300	6	0	0	1	1
PVP01_0820100	6	1	1	0	1
PVP01_0520700	6	1	1	0	1
PVP01_1235300	6	1	1	0	1
PVP01_1266700	6	1	0	1	1
PVP01_1426900	6	1	0	1	1
PVP01_0920600	6	1	0	1	1
PVP01_1421300	6	0	1	1	1
PVP01_0101400	5	0	0	0	1
PVP01_0109900	5	0	0	0	1
PVP01_0112700	5	0	0	0	1
PVP01_0818300	5	0	0	0	1
PVP01_0836200	5	0	0	0	1
PVP01_1120900	5	0	0	0	1
PVP01_1225400	5	0	0	0	1
PVP01_1461000	5	0	0	0	1
PVP01_0002540	5	0	0	0	1
PVP01_0009810	5	0	0	0	1
PVP01_0815900	5	1	0	0	0
PVP01_0823500	5	1	0	0	0
PVP01_1014700	5	1	0	0	0
PVP01_1224100	5	1	0	0	0
PVP01_1243300	5	1	0	0	0
PVP01_1303100	5	1	0	0	0
PVP01_1303900	5	1	0	0	0
PVP01_1417200	5	1	0	0	0
PVP01_0101800	5	0	0	0	1
PVP01_0112800	5	0	0	0	1
PVP01_0114600	5	0	0	0	1
PVP01_0117600	5	0	0	0	1
PVP01_0118800	5	0	0	0	1
PVP01_0200200	5	0	0	0	1
PVP01_0203200	5	0	0	0	1
PVP01_0203700	5	0	0	0	1
PVP01_0204100	5	0	0	0	1
PVP01_0212100	5	0	0	0	1
PVP01_0215300	5	0	1	0	0
PVP01_0218000	5	0	0	0	1
PVP01_0301400	5	0	0	0	1
PVP01_0306100	5	0	0	0	1
PVP01_0307600	5	0	0	0	1
PVP01_0311300	5	0	0	0	1
PVP01_0312200	5	0	0	0	1
PVP01_0320300	5	0	0	0	1
PVP01_0403300	5	0	0	0	1
PVP01_0407300	5	0	0	0	1
PVP01_0407500	5	0	0	0	1
PVP01_0418000	5	0	0	0	1
PVP01_0420900	5	0	0	0	1
PVP01_0423800	5	0	0	0	1
PVP01_0424100	5	0	0	0	1
PVP01_0502800	5	0	0	0	1
PVP01_0511200	5	0	0	0	1
PVP01_0515300	5	0	0	0	1
PVP01_0516600	5	0	0	0	1
PVP01_0519800	5	0	1	0	0
PVP01_0533400	5	0	0	0	1
PVP01_0606200	5	0	0	0	1
PVP01_0606900	5	0	0	0	1
PVP01_0607000	5	0	0	0	1
PVP01_0611300	5	0	1	0	0
PVP01_0612800	5	0	0	0	1
PVP01_0617000	5	0	0	0	1
PVP01_0623800	5	0	0	0	1
PVP01_0700100	5	0	0	0	1
PVP01_0712700	5	0	1	0	0
PVP01_0716800	5	0	0	0	1
PVP01_0719600	5	0	1	0	0
PVP01_0724000	5	0	0	0	1
PVP01_0725700	5	0	0	0	1
PVP01_0728700	5	0	0	0	1
PVP01_0800600	5	0	0	0	1
PVP01_0801700	5	0	0	0	1
PVP01_0805800	5	0	0	0	1
PVP01_0806900	5	0	1	0	0
PVP01_0818500	5	0	0	0	1
PVP01_0829100	5	0	0	0	1
PVP01_0830100	5	0	0	0	1
PVP01_0911400	5	0	0	0	1
PVP01_0917600	5	0	0	0	1
PVP01_0924600	5	0	0	0	1
PVP01_0927000	5	0	0	0	1
PVP01_0929100	5	0	0	0	1
PVP01_0936400	5	0	0	0	1
PVP01_0936500	5	0	0	0	1
PVP01_0937100	5	0	0	0	1
PVP01_0941200	5	0	0	0	1
PVP01_0946300	5	0	0	0	1
PVP01_0948200	5	0	0	0	1
PVP01_0948400	5	0	0	0	1
PVP01_0950200	5	0	0	0	1
PVP01_1015200	5	0	0	0	1
PVP01_1019900	5	0	0	0	1
PVP01_1024800	5	0	0	0	1
PVP01_1027600	5	0	0	0	1
PVP01_1032000	5	0	1	0	0
PVP01_1100800	5	0	0	0	1
PVP01_1101100	5	0	0	0	1
PVP01_1103000	5	0	0	0	1
PVP01_1105000	5	0	0	0	1
PVP01_1119300	5	0	0	0	1
PVP01_1137400	5	0	0	0	1
PVP01_1205400	5	0	1	0	0
PVP01_1206000	5	0	0	0	1
PVP01_1212300	5	0	0	0	1
PVP01_1218400	5	0	0	1	0
PVP01_1226500	5	0	0	0	1
PVP01_1245900	5	0	0	0	1
PVP01_1265700	5	0	0	0	1
PVP01_1267000	5	0	0	0	1
PVP01_1272000	5	0	0	0	1
PVP01_1302000	5	0	0	0	1
PVP01_1310900	5	0	0	0	1
PVP01_1312900	5	0	0	0	1
PVP01_1334500	5	0	0	0	1
PVP01_1343000	5	0	0	0	1
PVP01_1343800	5	0	0	0	1
PVP01_1347300	5	0	0	0	1
PVP01_1404800	5	0	0	0	1
PVP01_1418200	5	0	0	0	1
PVP01_1428100	5	0	0	0	1
PVP01_1428900	5	0	0	0	1
PVP01_1430600	5	0	0	0	1
PVP01_1436900	5	0	0	0	1
PVP01_1438700	5	0	0	0	1
PVP01_1441600	5	0	0	0	1
PVP01_1443800	5	0	0	0	1
PVP01_1444600	5	0	0	0	1
PVP01_1452900	5	0	0	0	1
PVP01_1454000	5	0	0	0	1
PVP01_1456500	5	0	0	0	1
PVP01_1461200	5	0	0	0	1
PVP01_1466600	5	0	0	0	1
PVP01_1466900	5	0	0	0	1
PVP01_0004820	5	0	0	0	1
PVP01_0005290	5	0	0	0	1
PVP01_0005710	5	0	0	0	1
PVP01_0005720	5	0	0	0	1
PVP01_0006000	5	0	0	0	1
PVP01_0000980	5	0	0	0	1
PVP01_0007300	5	0	0	0	1
PVP01_0011140	5	0	0	0	1
PVP01_0007830	5	0	0	0	1
PVP01_0008090	5	0	0	0	1
PVP01_0002210	5	0	0	0	1
PVP01_0008820	5	0	0	0	1
PVP01_0009210	5	0	0	0	1
PVP01_0002530	5	0	0	0	1
PVP01_0003360	5	0	0	0	1
PVP01_1117400	5	1	0	0	1
PVP01_0718900	5	0	0	1	1
PVP01_0108600	5	1	0	1	0
PVP01_0214300	5	1	0	0	1
PVP01_0304500	5	1	0	0	1
PVP01_0706700	5	1	0	0	1
PVP01_0717500	5	1	0	0	1
PVP01_0727700	5	1	0	0	1
PVP01_0730800	5	1	0	0	1
PVP01_0817400	5	1	0	1	0
PVP01_0828600	5	1	0	0	1
PVP01_1007600	5	1	1	0	0
PVP01_1110900	5	1	0	0	1
PVP01_1146300	5	1	0	0	1
PVP01_1242300	5	1	0	0	1
PVP01_1248400	5	1	0	0	1
PVP01_1267900	5	1	0	0	1
PVP01_1336500	5	1	0	0	1
PVP01_1341800	5	1	1	0	0
PVP01_1442800	5	1	0	0	1
PVP01_0101600	5	0	0	1	1
PVP01_0308200	5	0	1	0	1
PVP01_0314800	5	0	1	0	1
PVP01_0320400	5	0	1	0	1
PVP01_0414800	5	0	1	1	0
PVP01_0502600	5	0	1	0	1
PVP01_0509700	5	1	0	0	1
PVP01_0513300	5	0	0	1	1
PVP01_0528300	5	0	1	0	1
PVP01_0707500	5	0	1	0	1
PVP01_0725900	5	0	0	1	1
PVP01_0813900	5	0	0	1	1
PVP01_0908300	5	0	0	1	1
PVP01_0910200	5	0	0	1	1
PVP01_0930200	5	0	0	1	1
PVP01_0942400	5	0	1	1	0
PVP01_1000200	5	0	0	1	1
PVP01_1034900	5	0	0	1	1
PVP01_1141400	5	0	1	0	1
PVP01_1142400	5	0	1	0	1
PVP01_1143000	5	0	1	0	1
PVP01_1323400	5	0	1	0	1
PVP01_1334400	5	0	1	0	1
PVP01_1423400	5	0	0	1	1
PVP01_1433700	5	0	0	1	1
PVP01_0006510	5	0	0	1	1
PVP01_0905000	5	1	1	0	1
PVP01_0937700	5	1	1	0	1
PVP01_0942100	5	1	0	1	1
PVP01_1111300	5	1	1	0	1
PVP01_1142200	5	1	1	0	1
PVP01_1235600	5	1	0	1	1
PVP01_1437300	5	1	0	1	1
PVP01_0408300	5	0	1	1	1
PVP01_0417000	5	1	0	1	1
PVP01_0726000	5	1	0	1	1
PVP01_1029900	5	0	1	1	1
PVP01_1415800	5	0	1	1	1
PVP01_0101300	4	0	0	0	1
PVP01_0501300	4	0	0	0	1
PVP01_0511000	4	0	0	0	1
PVP01_0530800	4	0	0	0	1
PVP01_0531400	4	0	0	0	1
PVP01_0726500	4	0	0	0	1
PVP01_0811100	4	0	0	0	1
PVP01_1018400	4	0	0	0	1
PVP01_1029700	4	0	0	0	1
PVP01_1314600	4	0	0	0	1
PVP01_1338000	4	0	0	0	1
PVP01_1403400	4	0	0	0	1
PVP01_1439500	4	0	0	0	1
PVP01_0004760	4	0	0	0	1
PVP01_0006280	4	0	0	0	1
PVP01_0001490	4	0	0	0	1
PVP01_0001990	4	0	0	0	1
PVP01_0003060	4	0	0	0	1
PVP01_0003260	4	0	0	0	1
PVP01_0406900	4	1	0	0	0
PVP01_0517100	4	1	0	0	0
PVP01_0622400	4	1	0	0	0
PVP01_0813100	4	1	0	0	0
PVP01_0818800	4	1	0	0	0
PVP01_0907800	4	1	0	0	0
PVP01_0925600	4	1	0	0	0
PVP01_0945600	4	1	0	0	0
PVP01_1021400	4	1	0	0	0
PVP01_1204600	4	1	0	0	0
PVP01_1223000	4	1	0	0	0
PVP01_1260000	4	1	0	0	0
PVP01_1336100	4	1	0	0	0
PVP01_1405800	4	1	0	0	0
PVP01_1442300	4	1	0	0	0
PVP01_0101100	4	0	0	0	1
PVP01_0103100	4	0	0	0	1
PVP01_0206300	4	0	0	0	1
PVP01_0207300	4	0	0	0	1
PVP01_0214400	4	0	0	0	1
PVP01_0217000	4	0	1	0	0
PVP01_0217300	4	0	0	0	1
PVP01_0217400	4	0	0	0	1
PVP01_0217500	4	0	0	0	1
PVP01_0218100	4	0	0	0	1
PVP01_0220900	4	0	0	0	1
PVP01_0221800	4	0	0	1	0
PVP01_0300400	4	0	0	0	1
PVP01_0305300	4	0	0	0	1
PVP01_0312600	4	1	0	0	0
PVP01_0313100	4	0	0	0	1
PVP01_0319500	4	0	0	0	1
PVP01_0319600	4	0	0	0	1
PVP01_0321100	4	0	0	0	1
PVP01_0402500	4	0	0	0	1
PVP01_0403500	4	0	0	0	1
PVP01_0403900	4	0	0	0	1
PVP01_0408000	4	0	0	0	1
PVP01_0410800	4	0	0	0	1
PVP01_0411500	4	0	0	0	1
PVP01_0416800	4	0	0	0	1
PVP01_0416900	4	0	0	0	1
PVP01_0417100	4	0	0	0	1
PVP01_0417200	4	0	0	0	1
PVP01_0417300	4	0	0	0	1
PVP01_0417600	4	0	0	0	1
PVP01_0417700	4	0	0	0	1
PVP01_0417900	4	0	0	0	1
PVP01_0419200	4	0	0	0	1
PVP01_0422300	4	0	1	0	0
PVP01_0424000	4	0	0	0	1
PVP01_0505100	4	0	1	0	0
PVP01_0511300	4	0	0	0	1
PVP01_0514400	4	0	0	0	1
PVP01_0518600	4	0	1	0	0
PVP01_0520400	4	0	0	0	1
PVP01_0520600	4	0	0	0	1
PVP01_0525800	4	0	0	0	1
PVP01_0527000	4	0	0	0	1
PVP01_0600600	4	0	0	0	1
PVP01_0604500	4	0	0	0	1
PVP01_0608100	4	0	1	0	0
PVP01_0608500	4	0	1	0	0
PVP01_0613700	4	0	1	0	0
PVP01_0614200	4	0	0	0	1
PVP01_0615200	4	0	0	0	1
PVP01_0617600	4	0	0	0	1
PVP01_0617900	4	0	0	0	1
PVP01_0621400	4	0	0	0	1
PVP01_0622300	4	0	0	0	1
PVP01_0718700	4	0	1	0	0
PVP01_0720900	4	0	0	0	1
PVP01_0722200	4	0	0	0	1
PVP01_0729200	4	0	0	0	1
PVP01_0731800	4	0	0	0	1
PVP01_0732600	4	0	0	0	1
PVP01_0735300	4	0	0	0	1
PVP01_0735500	4	0	0	0	1
PVP01_0737100	4	0	0	0	1
PVP01_0738000	4	0	0	0	1
PVP01_0802900	4	0	1	0	0
PVP01_0831000	4	0	0	0	1
PVP01_0833500	4	0	1	0	0
PVP01_0839400	4	0	0	0	1
PVP01_0904900	4	0	0	1	0
PVP01_0910000	4	0	0	0	1
PVP01_0912400	4	0	0	0	1
PVP01_0913500	4	0	0	0	1
PVP01_0919700	4	0	0	0	1
PVP01_0923800	4	0	0	0	1
PVP01_0926500	4	0	0	0	1
PVP01_0928700	4	0	0	0	1
PVP01_0946100	4	0	0	0	1
PVP01_1003600	4	0	0	0	1
PVP01_1009700	4	0	0	0	1
PVP01_1011500	4	0	0	0	1
PVP01_1020700	4	0	0	0	1
PVP01_1024200	4	0	0	0	1
PVP01_1025600	4	0	0	0	1
PVP01_1035300	4	0	0	0	1
PVP01_1105700	4	0	0	0	1
PVP01_1114200	4	0	0	0	1
PVP01_1124500	4	0	0	0	1
PVP01_1127800	4	0	0	0	1
PVP01_1134800	4	0	0	0	1
PVP01_1142800	4	0	0	0	1
PVP01_1144500	4	0	1	0	0
PVP01_1146500	4	0	0	0	1
PVP01_1148100	4	0	0	0	1
PVP01_1148300	4	0	0	0	1
PVP01_1149000	4	0	0	0	1
PVP01_1200800	4	0	0	0	1
PVP01_1206800	4	0	0	0	1
PVP01_1209400	4	0	0	0	1
PVP01_1209700	4	0	1	0	0
PVP01_1217000	4	0	1	0	0
PVP01_1225500	4	0	0	0	1
PVP01_1228400	4	0	0	0	1
PVP01_1232300	4	0	0	0	1
PVP01_1232500	4	0	0	0	1
PVP01_1232600	4	0	0	0	1
PVP01_1234800	4	0	0	0	1
PVP01_1245400	4	0	0	0	1
PVP01_1261400	4	0	0	0	1
PVP01_1263000	4	0	0	0	1
PVP01_1265500	4	0	1	0	0
PVP01_1267800	4	0	0	0	1
PVP01_1272600	4	0	0	0	1
PVP01_1304900	4	0	0	0	1
PVP01_1306000	4	0	0	0	1
PVP01_1307200	4	0	0	0	1
PVP01_1310500	4	0	0	0	1
PVP01_1314300	4	0	0	0	1
PVP01_1316000	4	0	0	0	1
PVP01_1316200	4	0	0	0	1
PVP01_1316400	4	0	0	0	1
PVP01_1326500	4	0	0	0	1
PVP01_1327300	4	0	0	0	1
PVP01_1329500	4	0	0	0	1
PVP01_1332900	4	0	0	0	1
PVP01_1337700	4	0	0	0	1
PVP01_1343400	4	0	0	0	1
PVP01_1347200	4	0	0	0	1
PVP01_1404900	4	0	0	0	1
PVP01_1407600	4	0	0	0	1
PVP01_1415600	4	0	0	0	1
PVP01_1421900	4	0	0	0	1
PVP01_1424400	4	0	0	0	1
PVP01_1432900	4	0	0	0	1
PVP01_1439000	4	0	0	0	1
PVP01_1441700	4	0	0	0	1
PVP01_1448000	4	0	0	0	1
PVP01_1451600	4	0	0	0	1
PVP01_1459900	4	0	0	0	1
PVP01_1462400	4	0	1	0	0
PVP01_1463300	4	0	0	0	1
PVP01_1463900	4	0	0	0	1
PVP01_1471100	4	0	0	0	1
PVP01_1471700	4	0	0	0	1
PVP01_1472300	4	0	0	0	1
PVP01_0000230	4	0	0	0	1
PVP01_0000330	4	0	0	0	1
PVP01_0000480	4	0	0	0	1
PVP01_0000510	4	0	0	0	1
PVP01_0004080	4	0	0	0	1
PVP01_0004170	4	0	0	0	1
PVP01_0010400	4	0	0	0	1
PVP01_0004920	4	0	0	0	1
PVP01_0005220	4	0	0	0	1
PVP01_0005340	4	0	0	0	1
PVP01_0005890	4	0	0	0	1
PVP01_0001160	4	0	0	0	1
PVP01_0001190	4	0	0	0	1
PVP01_0001400	4	0	0	0	1
PVP01_0006900	4	0	0	0	1
PVP01_0007650	4	0	0	0	1
PVP01_0001680	4	0	0	0	1
PVP01_0007720	4	0	0	0	1
PVP01_0011130	4	0	0	0	1
PVP01_0007910	4	0	0	0	1
PVP01_0008520	4	0	0	0	1
PVP01_0002050	4	0	0	0	1
PVP01_0002400	4	0	0	0	1
PVP01_0002500	4	0	0	0	1
PVP01_0002710	4	0	0	0	1
PVP01_0009340	4	0	0	0	1
PVP01_0009540	4	0	0	0	1
PVP01_0009580	4	0	0	0	1
PVP01_0009740	4	0	0	0	1
PVP01_0009760	4	0	0	0	1
PVP01_0009790	4	0	0	0	1
PVP01_0003150	4	0	0	0	1
PVP01_0003830	4	0	0	0	1
PVP01_0003910	4	0	0	0	1
PVP01_0106100	4	0	0	1	1
PVP01_0828900	4	0	1	0	1
PVP01_1136000	4	0	1	1	0
PVP01_1229800	4	0	1	0	1
PVP01_0004420	4	0	0	1	1
PVP01_0207400	4	1	0	0	1
PVP01_0212200	4	1	0	0	1
PVP01_0414500	4	1	1	0	0
PVP01_0505800	4	1	0	0	1
PVP01_0526500	4	1	0	0	1
PVP01_0526700	4	1	0	0	1
PVP01_0528800	4	1	0	0	1
PVP01_0615100	4	1	0	1	0
PVP01_0730100	4	1	0	0	1
PVP01_0809500	4	1	0	0	1
PVP01_0813600	4	1	0	0	1
PVP01_0917400	4	1	0	0	1
PVP01_0940600	4	1	0	0	1
PVP01_1104700	4	1	0	1	0
PVP01_1119200	4	1	0	0	1
PVP01_1139200	4	1	0	1	0
PVP01_1212900	4	1	0	0	1
PVP01_1312200	4	1	1	0	0
PVP01_1421700	4	1	0	0	1
PVP01_1426700	4	1	1	0	0
PVP01_1427100	4	1	0	0	1
PVP01_0102300	4	0	0	1	1
PVP01_0209200	4	0	1	0	1
PVP01_0505500	4	0	1	1	0
PVP01_0533600	4	0	0	1	1
PVP01_0607600	4	0	0	1	1
PVP01_0712600	4	0	1	0	1
PVP01_0719500	4	0	0	1	1
PVP01_0723000	4	0	1	0	1
PVP01_0724500	4	0	1	0	1
PVP01_0727000	4	0	1	1	0
PVP01_0730600	4	0	1	0	1
PVP01_0820500	4	1	0	0	1
PVP01_0914900	4	0	1	1	0
PVP01_0929700	4	0	0	1	1
PVP01_0939700	4	0	1	0	1
PVP01_0940800	4	0	1	0	1
PVP01_0947200	4	0	1	0	1
PVP01_1011700	4	0	0	1	1
PVP01_1025800	4	0	1	0	1
PVP01_1127200	4	1	0	0	1
PVP01_1135800	4	0	1	0	1
PVP01_1138200	4	0	1	0	1
PVP01_1206200	4	0	1	0	1
PVP01_1211800	4	0	1	0	1
PVP01_1226200	4	0	1	0	1
PVP01_1234200	4	0	0	1	1
PVP01_1247100	4	1	0	0	1
PVP01_1251400	4	0	1	0	1
PVP01_1254200	4	0	0	1	1
PVP01_1255200	4	0	0	1	1
PVP01_1260400	4	0	1	0	1
PVP01_1262300	4	0	0	1	1
PVP01_1268200	4	0	0	1	1
PVP01_1331000	4	0	1	0	1
PVP01_1339600	4	0	0	1	1
PVP01_1347700	4	0	0	1	1
PVP01_1415400	4	0	0	1	1
PVP01_1416800	4	0	1	0	1
PVP01_1430000	4	0	0	1	1
PVP01_1430500	4	0	0	1	1
PVP01_1443300	4	0	0	1	1
PVP01_0004060	4	0	0	1	1
PVP01_0004100	4	0	0	1	1
PVP01_0004620	4	0	0	1	1
PVP01_0005840	4	0	0	1	1
PVP01_0005940	4	0	0	1	1
PVP01_0001240	4	0	0	1	1
PVP01_0007460	4	0	0	1	1
PVP01_0417800	4	1	1	0	1
PVP01_1122700	4	1	1	0	1
PVP01_1210500	4	1	1	0	1
PVP01_1438000	4	1	1	0	1
PVP01_1430400	4	0	1	1	1
PVP01_0101500	3	0	0	0	1
PVP01_0119800	3	0	0	0	1
PVP01_0121400	3	0	0	0	1
PVP01_0121500	3	0	0	0	1
PVP01_0422800	3	0	0	0	1
PVP01_1336700	3	0	0	0	1
PVP01_1345100	3	0	1	0	0
PVP01_1347600	3	0	0	0	1
PVP01_1463000	3	0	0	0	1
PVP01_0000170	3	0	0	0	1
PVP01_0000420	3	0	0	0	1
PVP01_0000470	3	0	0	0	1
PVP01_0000570	3	0	0	0	1
PVP01_0000700	3	0	0	0	1
PVP01_0004700	3	0	0	0	1
PVP01_0004730	3	0	0	0	1
PVP01_0005240	3	0	0	0	1
PVP01_0010610	3	0	0	0	1
PVP01_0005510	3	0	0	0	1
PVP01_0005770	3	0	0	0	1
PVP01_0005780	3	0	0	0	1
PVP01_0005930	3	0	0	0	1
PVP01_0006050	3	0	0	0	1
PVP01_0006300	3	0	0	0	1
PVP01_0000990	3	0	0	0	1
PVP01_0001170	3	0	0	0	1
PVP01_0001200	3	0	0	0	1
PVP01_0001250	3	0	0	0	1
PVP01_0001300	3	0	0	0	1
PVP01_0001310	3	0	0	0	1
PVP01_0001350	3	0	0	0	1
PVP01_0006370	3	0	0	0	1
PVP01_0006420	3	0	0	0	1
PVP01_0007520	3	0	0	0	1
PVP01_0001830	3	0	0	0	1
PVP01_0001860	3	0	0	0	1
PVP01_0001900	3	0	0	0	1
PVP01_0002010	3	0	0	0	1
PVP01_0002040	3	0	0	0	1
PVP01_0011160	3	0	0	0	1
PVP01_0008040	3	0	0	0	1
PVP01_0008180	3	0	0	0	1
PVP01_0008490	3	0	0	0	1
PVP01_0008560	3	0	0	0	1
PVP01_0009330	3	0	0	0	1
PVP01_0009500	3	0	0	0	1
PVP01_0009560	3	0	0	1	0
PVP01_0009900	3	0	0	0	1
PVP01_0003250	3	0	0	0	1
PVP01_0003280	3	0	0	0	1
PVP01_0003480	3	0	0	0	1
PVP01_0003800	3	0	0	0	1
PVP01_0516800	3	1	0	0	0
PVP01_0527800	3	1	0	0	0
PVP01_0706600	3	1	0	0	0
PVP01_0821300	3	1	0	0	0
PVP01_0832600	3	1	0	0	0
PVP01_0837500	3	1	0	0	0
PVP01_1003100	3	1	0	0	0
PVP01_1010600	3	1	0	0	0
PVP01_1013600	3	1	0	0	0
PVP01_1341900	3	1	0	0	0
PVP01_1410200	3	1	0	0	0
PVP01_1414200	3	1	0	0	0
PVP01_1455000	3	1	0	0	0
PVP01_1468200	3	1	0	0	0
PVP01_0100200	3	0	0	0	1
PVP01_0100300	3	0	0	0	1
PVP01_0100500	3	0	0	0	1
PVP01_0100600	3	0	0	0	1
PVP01_0100700	3	0	0	0	1
PVP01_0101200	3	0	0	0	1
PVP01_0101700	3	0	0	0	1
PVP01_0102000	3	0	0	0	1
PVP01_0102200	3	0	0	1	0
PVP01_0108000	3	0	0	0	1
PVP01_0108200	3	0	0	0	1
PVP01_0110300	3	0	0	0	1
PVP01_0112300	3	0	0	0	1
PVP01_0113800	3	0	0	0	1
PVP01_0114200	3	0	0	0	1
PVP01_0117800	3	0	0	0	1
PVP01_0118500	3	0	0	0	1
PVP01_0120100	3	0	0	0	1
PVP01_0120900	3	0	0	0	1
PVP01_0121000	3	0	0	0	1
PVP01_0121800	3	0	0	0	1
PVP01_0122200	3	0	0	0	1
PVP01_0200100	3	0	0	0	1
PVP01_0200300	3	0	0	0	1
PVP01_0200500	3	0	0	0	1
PVP01_0200900	3	0	0	0	1
PVP01_0201000	3	0	0	0	1
PVP01_0201400	3	0	1	0	0
PVP01_0201600	3	0	0	0	1
PVP01_0203300	3	0	1	0	0
PVP01_0204000	3	0	1	0	0
PVP01_0210400	3	0	0	0	1
PVP01_0211100	3	0	0	0	1
PVP01_0213300	3	0	0	0	1
PVP01_0213700	3	0	0	0	1
PVP01_0217700	3	0	0	0	1
PVP01_0217800	3	0	0	0	1
PVP01_0217900	3	0	0	0	1
PVP01_0218200	3	0	0	0	1
PVP01_0218300	3	0	0	0	1
PVP01_0219500	3	0	0	0	1
PVP01_0219800	3	0	0	0	1
PVP01_0220000	3	0	0	0	1
PVP01_0220100	3	0	0	0	1
PVP01_0221000	3	0	0	0	1
PVP01_0221300	3	0	0	0	1
PVP01_0221600	3	0	0	0	1
PVP01_0300500	3	0	0	0	1
PVP01_0301300	3	0	0	0	1
PVP01_0302600	3	0	0	0	1
PVP01_0304400	3	0	0	0	1
PVP01_0307700	3	0	0	0	1
PVP01_0308600	3	0	0	0	1
PVP01_0309900	3	0	0	0	1
PVP01_0315400	3	0	0	0	1
PVP01_0316600	3	0	1	0	0
PVP01_0317500	3	0	0	0	1
PVP01_0320500	3	0	0	0	1
PVP01_0400100	3	0	0	0	1
PVP01_0400200	3	0	0	0	1
PVP01_0400400	3	0	0	0	1
PVP01_0400500	3	0	0	0	1
PVP01_0400800	3	0	0	0	1
PVP01_0400900	3	0	0	0	1
PVP01_0401700	3	0	0	0	1
PVP01_0402200	3	0	0	0	1
PVP01_0402400	3	0	0	0	1
PVP01_0403200	3	0	0	0	1
PVP01_0403400	3	0	0	0	1
PVP01_0403600	3	0	0	0	1
PVP01_0404100	3	0	0	0	1
PVP01_0407700	3	1	0	0	0
PVP01_0410500	3	0	0	0	1
PVP01_0411800	3	0	0	0	1
PVP01_0412500	3	0	0	0	1
PVP01_0412900	3	0	0	0	1
PVP01_0413000	3	0	1	0	0
PVP01_0416300	3	0	0	0	1
PVP01_0418200	3	0	0	0	1
PVP01_0418800	3	0	0	0	1
PVP01_0419600	3	0	1	0	0
PVP01_0422500	3	0	0	0	1
PVP01_0423000	3	0	0	0	1
PVP01_0423700	3	0	0	0	1
PVP01_0501200	3	0	0	0	1
PVP01_0501400	3	0	0	0	1
PVP01_0501500	3	0	0	0	1
PVP01_0502700	3	0	0	0	1
PVP01_0502900	3	0	0	0	1
PVP01_0503000	3	0	0	0	1
PVP01_0503100	3	0	0	0	1
PVP01_0503200	3	0	0	0	1
PVP01_0510100	3	0	0	0	1
PVP01_0519200	3	0	1	0	0
PVP01_0519600	3	0	0	0	1
PVP01_0520900	3	0	0	0	1
PVP01_0522900	3	0	0	1	0
PVP01_0533500	3	0	0	0	1
PVP01_0533800	3	0	0	0	1
PVP01_0534000	3	0	0	0	1
PVP01_0534500	3	0	0	0	1
PVP01_0534600	3	0	0	0	1
PVP01_0600100	3	0	0	0	1
PVP01_0600200	3	0	0	0	1
PVP01_0600400	3	0	0	0	1
PVP01_0600500	3	0	0	1	0
PVP01_0600700	3	0	0	0	1
PVP01_0600800	3	0	0	0	1
PVP01_0605400	3	1	0	0	0
PVP01_0605800	3	0	0	0	1
PVP01_0607400	3	0	0	0	1
PVP01_0611200	3	0	0	0	1
PVP01_0612400	3	0	0	0	1
PVP01_0613600	3	0	0	0	1
PVP01_0614800	3	0	0	0	1
PVP01_0618400	3	0	1	0	0
PVP01_0618800	3	0	0	0	1
PVP01_0621000	3	0	1	0	0
PVP01_0621300	3	0	0	0	1
PVP01_0622000	3	0	0	0	1
PVP01_0622100	3	0	1	0	0
PVP01_0624300	3	0	0	0	1
PVP01_0624400	3	0	0	0	1
PVP01_0624500	3	0	0	0	1
PVP01_0624600	3	0	0	0	1
PVP01_0700600	3	0	0	0	1
PVP01_0702100	3	0	0	0	1
PVP01_0703500	3	0	0	0	1
PVP01_0711900	3	0	0	0	1
PVP01_0717700	3	0	0	0	1
PVP01_0720200	3	0	0	0	1
PVP01_0720300	3	0	0	0	1
PVP01_0721300	3	0	0	0	1
PVP01_0725100	3	0	0	0	1
PVP01_0726700	3	0	0	0	1
PVP01_0729400	3	0	0	0	1
PVP01_0731500	3	0	0	0	1
PVP01_0733300	3	0	1	0	0
PVP01_0735400	3	0	0	0	1
PVP01_0735600	3	0	0	0	1
PVP01_0735700	3	0	0	0	1
PVP01_0735900	3	0	0	0	1
PVP01_0736000	3	0	0	0	1
PVP01_0736100	3	0	0	0	1
PVP01_0736300	3	0	0	0	1
PVP01_0736900	3	0	0	0	1
PVP01_0737000	3	0	0	0	1
PVP01_0737200	3	0	0	0	1
PVP01_0737600	3	0	0	0	1
PVP01_0737700	3	0	0	0	1
PVP01_0737900	3	0	0	0	1
PVP01_0800100	3	0	0	0	1
PVP01_0802300	3	0	0	0	1
PVP01_0808400	3	0	0	0	1
PVP01_0809900	3	0	0	0	1
PVP01_0816600	3	0	0	0	1
PVP01_0817200	3	0	1	0	0
PVP01_0819300	3	0	0	0	1
PVP01_0823800	3	0	1	0	0
PVP01_0824500	3	0	0	0	1
PVP01_0830200	3	0	0	0	1
PVP01_0830300	3	0	0	0	1
PVP01_0832300	3	0	0	0	1
PVP01_0834900	3	0	0	0	1
PVP01_0835700	3	0	0	0	1
PVP01_0837300	3	0	0	0	1
PVP01_0838400	3	0	0	0	1
PVP01_0838600	3	0	0	0	1
PVP01_0838700	3	0	0	0	1
PVP01_0839000	3	0	0	0	1
PVP01_0839200	3	0	0	0	1
PVP01_0839600	3	0	0	0	1
PVP01_0839800	3	0	0	0	1
PVP01_0840500	3	0	0	0	1
PVP01_0840600	3	0	0	0	1
PVP01_0840800	3	0	0	0	1
PVP01_0840900	3	0	0	0	1
PVP01_0900600	3	0	0	0	1
PVP01_0900700	3	0	0	0	1
PVP01_0900900	3	0	0	0	1
PVP01_0901000	3	0	0	0	1
PVP01_0905200	3	0	0	0	1
PVP01_0907000	3	0	0	0	1
PVP01_0907300	3	0	0	0	1
PVP01_0908900	3	0	0	0	1
PVP01_0912700	3	0	0	0	1
PVP01_0916400	3	0	1	0	0
PVP01_0916600	3	0	0	0	1
PVP01_0920100	3	0	0	0	1
PVP01_0922200	3	0	0	0	1
PVP01_0922600	3	0	0	0	1
PVP01_0925400	3	0	0	0	1
PVP01_0939600	3	0	0	0	1
PVP01_0940100	3	0	0	0	1
PVP01_0943000	3	0	0	0	1
PVP01_0943200	3	0	1	0	0
PVP01_0944600	3	0	1	0	0
PVP01_0946200	3	0	0	0	1
PVP01_0947600	3	0	0	0	1
PVP01_0949400	3	0	0	0	1
PVP01_0949600	3	0	0	0	1
PVP01_0949700	3	0	0	0	1
PVP01_1000300	3	0	0	0	1
PVP01_1000600	3	0	0	0	1
PVP01_1000800	3	0	0	0	1
PVP01_1001100	3	0	0	0	1
PVP01_1001400	3	0	0	0	1
PVP01_1001500	3	0	0	0	1
PVP01_1001600	3	0	0	0	1
PVP01_1001800	3	0	0	0	1
PVP01_1002200	3	0	0	0	1
PVP01_1002300	3	0	0	0	1
PVP01_1010500	3	0	0	0	1
PVP01_1012600	3	0	0	0	1
PVP01_1020800	3	0	0	0	1
PVP01_1024600	3	0	0	0	1
PVP01_1027500	3	0	0	0	1
PVP01_1032100	3	0	0	0	1
PVP01_1033000	3	0	0	0	1
PVP01_1033600	3	0	0	0	1
PVP01_1034500	3	0	0	0	1
PVP01_1034800	3	0	0	0	1
PVP01_1035000	3	0	0	0	1
PVP01_1035100	3	0	0	0	1
PVP01_1035200	3	0	0	0	1
PVP01_1100200	3	0	0	0	1
PVP01_1100300	3	0	0	0	1
PVP01_1100700	3	0	0	0	1
PVP01_1100900	3	0	0	0	1
PVP01_1101000	3	0	0	0	1
PVP01_1104800	3	0	0	0	1
PVP01_1105100	3	0	0	0	1
PVP01_1108500	3	0	0	0	1
PVP01_1109400	3	0	1	0	0
PVP01_1113500	3	1	0	0	0
PVP01_1114100	3	0	0	0	1
PVP01_1120600	3	0	0	0	1
PVP01_1122000	3	0	0	0	1
PVP01_1123200	3	0	0	0	1
PVP01_1130200	3	0	0	0	1
PVP01_1131900	3	0	0	0	1
PVP01_1139000	3	0	1	0	0
PVP01_1139300	3	0	0	0	1
PVP01_1140200	3	0	0	0	1
PVP01_1141800	3	0	0	0	1
PVP01_1148200	3	0	0	0	1
PVP01_1148600	3	0	0	0	1
PVP01_1148700	3	0	0	0	1
PVP01_1200200	3	0	0	0	1
PVP01_1200400	3	0	0	0	1
PVP01_1200600	3	0	0	0	1
PVP01_1201000	3	0	0	0	1
PVP01_1201300	3	0	0	0	1
PVP01_1201900	3	0	0	0	1
PVP01_1203100	3	0	0	0	1
PVP01_1206500	3	0	0	0	1
PVP01_1206900	3	0	0	0	1
PVP01_1210000	3	0	0	0	1
PVP01_1210300	3	0	0	0	1
PVP01_1211400	3	0	0	0	1
PVP01_1212200	3	0	0	0	1
PVP01_1218900	3	0	0	0	1
PVP01_1225000	3	0	0	0	1
PVP01_1227400	3	0	0	0	1
PVP01_1228200	3	0	1	0	0
PVP01_1228600	3	0	0	0	1
PVP01_1229400	3	0	0	0	1
PVP01_1230300	3	0	0	0	1
PVP01_1230400	3	0	0	0	1
PVP01_1232200	3	0	0	0	1
PVP01_1237200	3	0	0	0	1
PVP01_1239300	3	0	0	0	1
PVP01_1240500	3	0	0	0	1
PVP01_1245200	3	0	0	0	1
PVP01_1248600	3	0	0	0	1
PVP01_1251800	3	0	1	0	0
PVP01_1256100	3	0	0	0	1
PVP01_1257700	3	0	0	0	1
PVP01_1258000	3	0	0	0	1
PVP01_1258100	3	0	1	0	0
PVP01_1259900	3	0	1	0	0
PVP01_1261200	3	0	0	0	1
PVP01_1261300	3	0	0	0	1
PVP01_1261800	3	0	1	0	0
PVP01_1262600	3	0	0	0	1
PVP01_1262700	3	0	1	0	0
PVP01_1262800	3	0	0	0	1
PVP01_1263700	3	0	0	0	1
PVP01_1265200	3	0	0	0	1
PVP01_1266200	3	0	0	0	1
PVP01_1268900	3	0	0	0	1
PVP01_1269100	3	0	0	0	1
PVP01_1269600	3	0	1	0	0
PVP01_1270400	3	0	0	0	1
PVP01_1271900	3	0	0	0	1
PVP01_1272100	3	0	0	0	1
PVP01_1272200	3	0	0	0	1
PVP01_1272300	3	0	0	0	1
PVP01_1272400	3	0	0	0	1
PVP01_1273900	3	0	0	0	1
PVP01_1274400	3	0	0	0	1
PVP01_1274700	3	0	0	0	1
PVP01_1274800	3	0	0	0	1
PVP01_1274900	3	0	0	0	1
PVP01_1300200	3	0	0	0	1
PVP01_1300300	3	0	0	0	1
PVP01_1305300	3	0	0	0	1
PVP01_1306100	3	0	0	0	1
PVP01_1307800	3	0	0	0	1
PVP01_1310200	3	0	0	0	1
PVP01_1311200	3	0	0	0	1
PVP01_1315100	3	0	1	0	0
PVP01_1316800	3	0	1	0	0
PVP01_1319400	3	0	0	0	1
PVP01_1319600	3	0	0	0	1
PVP01_1325200	3	0	0	0	1
PVP01_1326900	3	0	0	0	1
PVP01_1327400	3	1	0	0	0
PVP01_1327700	3	0	1	0	0
PVP01_1328300	3	0	0	0	1
PVP01_1330700	3	0	0	0	1
PVP01_1333400	3	0	0	0	1
PVP01_1335000	3	0	0	0	1
PVP01_1347400	3	0	0	0	1
PVP01_1347500	3	0	0	0	1
PVP01_1347800	3	0	0	0	1
PVP01_1400400	3	0	0	0	1
PVP01_1403600	3	0	0	0	1
PVP01_1407500	3	0	0	0	1
PVP01_1411800	3	0	0	0	1
PVP01_1413500	3	1	0	0	0
PVP01_1413800	3	0	0	0	1
PVP01_1417500	3	0	0	0	1
PVP01_1417600	3	0	1	0	0
PVP01_1427600	3	0	1	0	0
PVP01_1429500	3	0	0	0	1
PVP01_1432700	3	0	0	0	1
PVP01_1434100	3	0	0	0	1
PVP01_1441300	3	0	0	0	1
PVP01_1443200	3	0	0	0	1
PVP01_1445900	3	0	0	0	1
PVP01_1449600	3	0	0	0	1
PVP01_1450500	3	0	0	0	1
PVP01_1451700	3	0	0	0	1
PVP01_1452000	3	0	0	0	1
PVP01_1454500	3	0	0	0	1
PVP01_1455400	3	0	0	0	1
PVP01_1455500	3	0	0	0	1
PVP01_1455700	3	0	0	0	1
PVP01_1458300	3	0	0	0	1
PVP01_1460700	3	0	0	1	0
PVP01_1466200	3	0	0	0	1
PVP01_1468300	3	0	0	0	1
PVP01_1469300	3	0	1	0	0
PVP01_1469600	3	0	0	0	1
PVP01_1470800	3	0	0	0	1
PVP01_1471000	3	0	0	0	1
PVP01_1471200	3	0	0	0	1
PVP01_1472500	3	0	0	0	1
PVP01_1472800	3	0	0	0	1
PVP01_0000030	3	0	0	0	1
PVP01_0000040	3	0	0	0	1
PVP01_0000050	3	0	0	0	1
PVP01_0000240	3	0	0	0	1
PVP01_0000280	3	0	0	0	1
PVP01_0000300	3	0	0	0	1
PVP01_0000320	3	0	0	0	1
PVP01_0000350	3	0	0	0	1
PVP01_0000360	3	0	0	0	1
PVP01_0000370	3	0	0	0	1
PVP01_0000390	3	0	0	0	1
PVP01_0000400	3	0	0	0	1
PVP01_0000410	3	0	0	0	1
PVP01_0000430	3	0	0	0	1
PVP01_0000440	3	0	0	0	1
PVP01_0000460	3	0	0	0	1
PVP01_0000490	3	0	0	0	1
PVP01_0000500	3	0	0	0	1
PVP01_0000540	3	0	0	0	1
PVP01_0000550	3	0	0	0	1
PVP01_0000580	3	0	0	0	1
PVP01_0000590	3	0	0	0	1
PVP01_0000600	3	0	0	0	1
PVP01_0000620	3	0	0	0	1
PVP01_0000630	3	0	0	0	1
PVP01_0000660	3	0	0	0	1
PVP01_0000670	3	0	0	0	1
PVP01_0000680	3	0	0	0	1
PVP01_0000710	3	0	0	0	1
PVP01_0000720	3	0	0	0	1
PVP01_0000740	3	0	0	0	1
PVP01_0000770	3	0	0	0	1
PVP01_0000790	3	0	0	0	1
PVP01_0000810	3	0	0	0	1
PVP01_0000820	3	0	0	0	1
PVP01_0000830	3	0	0	0	1
PVP01_0000840	3	0	0	0	1
PVP01_0000870	3	0	0	0	1
PVP01_0000880	3	0	0	0	1
PVP01_0000890	3	0	0	0	1
PVP01_0000910	3	0	0	0	1
PVP01_0003930	3	0	0	0	1
PVP01_0003940	3	0	0	0	1
PVP01_0003970	3	0	0	0	1
PVP01_0004020	3	0	0	0	1
PVP01_0004030	3	0	0	0	1
PVP01_0004070	3	0	0	0	1
PVP01_0004130	3	0	0	0	1
PVP01_0004160	3	0	0	0	1
PVP01_0004180	3	0	0	0	1
PVP01_0004190	3	0	0	0	1
PVP01_0004200	3	0	0	0	1
PVP01_0010320	3	0	0	0	1
PVP01_0004310	3	0	0	0	1
PVP01_0004340	3	0	0	0	1
PVP01_0004360	3	0	0	0	1
PVP01_0004400	3	0	0	0	1
PVP01_0004410	3	0	0	0	1
PVP01_0010420	3	0	0	0	1
PVP01_0004430	3	0	0	0	1
PVP01_0004440	3	0	0	0	1
PVP01_0004480	3	0	0	0	1
PVP01_0004580	3	0	0	0	1
PVP01_0004590	3	0	0	0	1
PVP01_0004600	3	0	0	0	1
PVP01_0004610	3	0	0	0	1
PVP01_0004630	3	0	0	0	1
PVP01_0004650	3	0	0	0	1
PVP01_0004660	3	0	0	0	1
PVP01_0010450	3	0	0	0	1
PVP01_0004690	3	0	0	0	1
PVP01_0004720	3	0	0	0	1
PVP01_0004750	3	0	0	0	1
PVP01_0004800	3	0	0	0	1
PVP01_0004810	3	0	0	0	1
PVP01_0004840	3	0	0	0	1
PVP01_0004890	3	0	0	0	1
PVP01_0004910	3	0	0	0	1
PVP01_0010510	3	0	0	0	1
PVP01_0005190	3	0	0	0	1
PVP01_0005200	3	0	0	0	1
PVP01_0005250	3	0	0	0	1
PVP01_0005270	3	0	0	0	1
PVP01_0005310	3	0	0	0	1
PVP01_0005330	3	0	0	0	1
PVP01_0005430	3	0	0	0	1
PVP01_0010630	3	0	0	0	1
PVP01_0005530	3	0	0	0	1
PVP01_0005570	3	0	0	0	1
PVP01_0005630	3	0	0	0	1
PVP01_0005690	3	0	0	0	1
PVP01_0005740	3	0	0	0	1
PVP01_0005800	3	0	0	0	1
PVP01_0005830	3	0	0	0	1
PVP01_0005860	3	0	0	0	1
PVP01_0005880	3	0	0	0	1
PVP01_0005910	3	0	0	0	1
PVP01_0006010	3	0	0	0	1
PVP01_0006030	3	0	0	0	1
PVP01_0006070	3	0	0	0	1
PVP01_0006080	3	0	0	0	1
PVP01_0006100	3	0	0	0	1
PVP01_0006130	3	0	0	0	1
PVP01_0006150	3	0	0	0	1
PVP01_0000940	3	0	0	0	1
PVP01_0001000	3	0	0	0	1
PVP01_0001020	3	0	0	0	1
PVP01_0001070	3	0	0	0	1
PVP01_0001080	3	0	0	0	1
PVP01_0001090	3	0	0	0	1
PVP01_0001100	3	0	0	0	1
PVP01_0001120	3	0	0	0	1
PVP01_0001130	3	0	0	0	1
PVP01_0001140	3	0	0	0	1
PVP01_0001150	3	0	0	0	1
PVP01_0001180	3	0	0	0	1
PVP01_0001220	3	0	0	0	1
PVP01_0001230	3	0	0	0	1
PVP01_0001280	3	0	0	0	1
PVP01_0001320	3	0	0	0	1
PVP01_0001330	3	0	0	0	1
PVP01_0001360	3	0	0	0	1
PVP01_0001370	3	0	0	0	1
PVP01_0001380	3	0	0	0	1
PVP01_0001390	3	0	0	0	1
PVP01_0001410	3	0	0	0	1
PVP01_0001450	3	0	0	0	1
PVP01_0001460	3	0	0	0	1
PVP01_0001500	3	0	0	0	1
PVP01_0006380	3	0	0	0	1
PVP01_0006390	3	0	0	0	1
PVP01_0006430	3	0	0	0	1
PVP01_0006440	3	0	0	0	1
PVP01_0006460	3	0	0	0	1
PVP01_0006470	3	0	0	0	1
PVP01_0006480	3	0	0	0	1
PVP01_0006570	3	0	0	0	1
PVP01_0006580	3	0	0	0	1
PVP01_0006610	3	0	0	0	1
PVP01_0006700	3	0	0	0	1
PVP01_0006760	3	0	0	0	1
PVP01_0006810	3	0	0	0	1
PVP01_0006840	3	0	0	0	1
PVP01_0006860	3	0	0	0	1
PVP01_0006870	3	0	0	0	1
PVP01_0006890	3	0	0	0	1
PVP01_0006930	3	0	0	0	1
PVP01_0006960	3	0	0	0	1
PVP01_0006970	3	0	0	0	1
PVP01_0006990	3	0	0	0	1
PVP01_0007000	3	0	0	0	1
PVP01_0007040	3	0	0	0	1
PVP01_0007110	3	0	0	0	1
PVP01_0007140	3	0	0	0	1
PVP01_0007150	3	0	0	0	1
PVP01_0007170	3	0	0	0	1
PVP01_0007220	3	0	0	0	1
PVP01_0007240	3	0	0	0	1
PVP01_0007330	3	0	0	0	1
PVP01_0007390	3	0	0	0	1
PVP01_0007400	3	0	0	0	1
PVP01_0007410	3	0	0	0	1
PVP01_0007420	3	0	0	0	1
PVP01_0007440	3	0	0	0	1
PVP01_0007510	3	0	0	0	1
PVP01_0007560	3	0	0	0	1
PVP01_0007570	3	0	0	0	1
PVP01_0007590	3	0	0	0	1
PVP01_0007600	3	0	0	0	1
PVP01_0007610	3	0	0	0	1
PVP01_0007660	3	0	0	0	1
PVP01_0001600	3	0	0	0	1
PVP01_0001630	3	0	0	0	1
PVP01_0001650	3	0	0	0	1
PVP01_0001660	3	0	0	0	1
PVP01_0001690	3	0	0	0	1
PVP01_0001810	3	0	0	0	1
PVP01_0001920	3	0	0	0	1
PVP01_0001950	3	0	0	0	1
PVP01_0001960	3	0	0	0	1
PVP01_0001980	3	0	0	0	1
PVP01_0002000	3	0	0	0	1
PVP01_0002020	3	0	0	0	1
PVP01_0007740	3	0	0	0	1
PVP01_0007750	3	0	0	0	1
PVP01_0007760	3	0	0	0	1
PVP01_0007780	3	0	0	0	1
PVP01_0011070	3	0	0	0	1
PVP01_0011080	3	0	0	0	1
PVP01_0011100	3	0	0	0	1
PVP01_0007870	3	0	0	0	1
PVP01_0007900	3	0	0	0	1
PVP01_0007920	3	0	0	0	1
PVP01_0007930	3	0	0	0	1
PVP01_0007970	3	0	0	0	1
PVP01_0008020	3	0	0	0	1
PVP01_0008150	3	0	0	0	1
PVP01_0008230	3	0	0	0	1
PVP01_0008270	3	0	0	0	1
PVP01_0008300	3	0	0	0	1
PVP01_0008310	3	0	0	0	1
PVP01_0008320	3	0	0	0	1
PVP01_0008330	3	0	0	0	1
PVP01_0008370	3	0	0	0	1
PVP01_0008390	3	0	0	0	1
PVP01_0008400	3	0	0	0	1
PVP01_0008420	3	0	0	0	1
PVP01_0008430	3	0	0	0	1
PVP01_0008450	3	0	0	0	1
PVP01_0002090	3	0	0	0	1
PVP01_0002100	3	0	0	0	1
PVP01_0002110	3	0	0	0	1
PVP01_0002120	3	0	0	0	1
PVP01_0002130	3	0	0	0	1
PVP01_0002180	3	0	0	0	1
PVP01_0002240	3	0	0	0	1
PVP01_0002290	3	0	0	0	1
PVP01_0002320	3	0	0	0	1
PVP01_0002360	3	0	0	0	1
PVP01_0008640	3	0	0	0	1
PVP01_0008650	3	0	0	0	1
PVP01_0008710	3	0	0	0	1
PVP01_0008720	3	0	0	0	1
PVP01_0008730	3	0	0	0	1
PVP01_0008770	3	0	0	0	1
PVP01_0008780	3	0	0	0	1
PVP01_0009000	3	0	0	0	1
PVP01_0009010	3	0	0	0	1
PVP01_0009020	3	0	0	0	1
PVP01_0009070	3	0	0	0	1
PVP01_0009100	3	0	0	0	1
PVP01_0009180	3	0	0	0	1
PVP01_0009230	3	0	0	0	1
PVP01_0002420	3	0	0	0	1
PVP01_0002480	3	0	0	0	1
PVP01_0002490	3	0	0	0	1
PVP01_0002510	3	0	0	0	1
PVP01_0009300	3	0	0	0	1
PVP01_0009310	3	0	0	0	1
PVP01_0009360	3	0	0	0	1
PVP01_0009390	3	0	0	0	1
PVP01_0009450	3	0	0	0	1
PVP01_0009590	3	0	0	0	1
PVP01_0009600	3	0	0	0	1
PVP01_0009630	3	0	0	0	1
PVP01_0009670	3	0	0	0	1
PVP01_0002740	3	0	0	0	1
PVP01_0002760	3	0	0	0	1
PVP01_0002830	3	0	0	0	1
PVP01_0002860	3	0	0	0	1
PVP01_0002910	3	0	0	0	1
PVP01_0002920	3	0	0	0	1
PVP01_0002930	3	0	0	0	1
PVP01_0002940	3	0	0	0	1
PVP01_0003000	3	0	0	0	1
PVP01_0003030	3	0	0	0	1
PVP01_0009680	3	0	0	0	1
PVP01_0009710	3	0	0	0	1
PVP01_0009820	3	0	0	0	1
PVP01_0009830	3	0	0	0	1
PVP01_0009840	3	0	0	0	1
PVP01_0009870	3	0	0	0	1
PVP01_0003080	3	0	0	0	1
PVP01_0003100	3	0	0	0	1
PVP01_0003210	3	0	0	0	1
PVP01_0003220	3	0	0	0	1
PVP01_0003230	3	0	0	0	1
PVP01_0003270	3	0	0	0	1
PVP01_0009980	3	0	0	0	1
PVP01_0003350	3	0	0	0	1
PVP01_0003400	3	0	0	0	1
PVP01_0003490	3	0	0	0	1
PVP01_0003510	3	0	0	0	1
PVP01_0003520	3	0	0	0	1
PVP01_0003540	3	0	0	0	1
PVP01_0003560	3	0	0	0	1
PVP01_0003620	3	0	0	0	1
PVP01_0010150	3	0	0	0	1
PVP01_0010160	3	0	0	0	1
PVP01_0003660	3	0	0	0	1
PVP01_0003670	3	0	0	0	1
PVP01_0003700	3	0	0	0	1
PVP01_0003710	3	0	0	0	1
PVP01_0003730	3	0	0	0	1
PVP01_0003740	3	0	0	0	1
PVP01_0003770	3	0	0	0	1
PVP01_0003780	3	0	0	0	1
PVP01_0003790	3	0	0	0	1
PVP01_0003810	3	0	0	0	1
PVP01_0003860	3	0	0	0	1
PVP01_0003890	3	0	0	0	1
PVP01_0003900	3	0	0	0	1
PVP01_0010230	3	0	0	0	1
PVP01_1238100	3	1	1	0	0
PVP01_0121700	3	0	0	1	1
PVP01_1424500	3	0	1	0	1
PVP01_1465700	3	0	1	0	1
PVP01_0105900	3	1	0	1	0
PVP01_0300200	3	1	0	0	1
PVP01_0313300	3	1	0	0	1
PVP01_0319300	3	1	0	1	0
PVP01_0513400	3	1	0	0	1
PVP01_0526200	3	1	0	0	1
PVP01_0602700	3	1	1	0	0
PVP01_0605900	3	1	0	0	1
PVP01_0704200	3	1	0	0	1
PVP01_0708100	3	1	0	0	1
PVP01_0717800	3	1	0	0	1
PVP01_0828400	3	1	1	0	0
PVP01_0833000	3	1	0	0	1
PVP01_0904800	3	1	0	0	1
PVP01_0911200	3	1	0	0	1
PVP01_0924900	3	1	0	0	1
PVP01_1008700	3	1	0	0	1
PVP01_1010000	3	1	0	0	1
PVP01_1022600	3	1	0	0	1
PVP01_1029800	3	1	0	0	1
PVP01_1103100	3	1	1	0	0
PVP01_1120000	3	1	0	0	1
PVP01_1133100	3	1	0	0	1
PVP01_1144400	3	1	0	0	1
PVP01_1206400	3	1	0	0	1
PVP01_1207100	3	1	0	0	1
PVP01_1213400	3	1	0	1	0
PVP01_1216100	3	1	0	0	1
PVP01_1236900	3	1	1	0	0
PVP01_1303000	3	1	0	0	1
PVP01_1329700	3	1	0	0	1
PVP01_1331600	3	1	0	0	1
PVP01_1339500	3	1	0	0	1
PVP01_1339800	3	1	0	0	1
PVP01_1417100	3	1	0	0	1
PVP01_1423500	3	1	0	0	1
PVP01_1436700	3	1	0	0	1
PVP01_1437000	3	1	0	0	1
PVP01_1449000	3	1	0	0	1
PVP01_0102400	3	0	0	1	1
PVP01_0119200	3	0	0	1	1
PVP01_0119400	3	0	1	0	1
PVP01_0120200	3	0	0	1	1
PVP01_0208500	3	0	0	1	1
PVP01_0219600	3	0	0	1	1
PVP01_0401900	3	0	0	1	1
PVP01_0404000	3	0	0	1	1
PVP01_0405600	3	0	1	1	0
PVP01_0415700	3	0	0	1	1
PVP01_0423100	3	0	1	0	1
PVP01_0513700	3	0	1	1	0
PVP01_0533100	3	0	0	1	1
PVP01_0604600	3	0	1	0	1
PVP01_0616900	3	0	1	0	1
PVP01_0624100	3	0	0	1	1
PVP01_0703300	3	0	1	0	1
PVP01_0721100	3	0	1	0	1
PVP01_0733400	3	0	1	0	1
PVP01_0734300	3	0	1	0	1
PVP01_0735200	3	0	1	0	1
PVP01_0812800	3	0	1	0	1
PVP01_0815300	3	0	1	0	1
PVP01_0821800	3	0	1	0	1
PVP01_0909300	3	0	1	0	1
PVP01_0921700	3	0	1	0	1
PVP01_0922700	3	0	0	1	1
PVP01_1002000	3	0	0	1	1
PVP01_1008600	3	0	1	0	1
PVP01_1017300	3	0	1	0	1
PVP01_1023700	3	0	1	0	1
PVP01_1027200	3	0	1	0	1
PVP01_1027900	3	0	0	1	1
PVP01_1028900	3	0	0	1	1
PVP01_1034600	3	0	0	1	1
PVP01_1100500	3	0	0	1	1
PVP01_1117200	3	0	0	1	1
PVP01_1118100	3	0	1	0	1
PVP01_1128100	3	1	0	0	1
PVP01_1137100	3	0	1	1	0
PVP01_1140100	3	0	1	0	1
PVP01_1203300	3	0	1	1	0
PVP01_1217300	3	0	1	0	1
PVP01_1218600	3	0	0	1	1
PVP01_1234400	3	0	1	0	1
PVP01_1253500	3	0	0	1	1
PVP01_1269700	3	0	0	1	1
PVP01_1304100	3	1	0	0	1
PVP01_1308600	3	0	0	1	1
PVP01_1317200	3	0	1	0	1
PVP01_1346200	3	0	0	1	1
PVP01_1444000	3	0	1	0	1
PVP01_1462800	3	0	1	0	1
PVP01_1466700	3	1	0	0	1
PVP01_1469500	3	0	1	0	1
PVP01_0000750	3	0	0	1	1
PVP01_0004370	3	0	0	1	1
PVP01_0004390	3	0	1	0	1
PVP01_0004540	3	0	0	1	1
PVP01_0006770	3	0	0	1	1
PVP01_0008570	3	0	0	1	1
PVP01_0003640	3	0	0	1	1
PVP01_0116300	3	1	0	1	1
PVP01_0201700	3	1	1	0	1
PVP01_0717400	3	1	0	1	1
PVP01_0833200	3	1	1	1	0
PVP01_0835500	3	1	1	0	1
PVP01_0949500	3	1	0	1	1
PVP01_1014200	3	1	0	1	1
PVP01_1016600	3	1	0	1	1
PVP01_1147000	3	1	1	0	1
PVP01_1147700	3	1	1	0	1
PVP01_1235700	3	1	1	0	1
PVP01_1250900	3	1	1	0	1
PVP01_1324800	3	1	0	1	1
PVP01_1346000	3	1	0	1	1
PVP01_1410100	3	1	1	0	1
PVP01_1425900	3	1	0	1	1
PVP01_1460000	3	1	0	1	1
PVP01_0808800	3	1	1	0	1
PVP01_1202000	3	0	1	1	1
PVP01_1336600	3	0	1	1	1
PVP01_1432500	3	0	1	1	1
PVP01_1468800	3	0	1	1	1
PVP01_0308800	2	1	0	0	0
PVP01_1134400	2	1	0	0	0
PVP01_0109700	2	0	0	0	1
PVP01_0301600	2	0	0	0	1
PVP01_0303300	2	0	1	0	0
PVP01_0304100	2	0	0	0	1
PVP01_0304200	2	0	0	0	1
PVP01_0401100	2	0	0	0	1
PVP01_0401200	2	0	0	0	1
PVP01_0415000	2	0	0	0	1
PVP01_0418300	2	0	0	0	1
PVP01_0421400	2	0	0	0	1
PVP01_0504100	2	0	0	0	1
PVP01_0506800	2	0	0	0	1
PVP01_0515600	2	0	0	0	1
PVP01_0515700	2	0	0	0	1
PVP01_0515800	2	0	0	0	1
PVP01_0523200	2	0	0	0	1
PVP01_0523700	2	0	0	0	1
PVP01_0523800	2	0	1	0	0
PVP01_0532400	2	0	0	0	1
PVP01_0609000	2	0	0	0	1
PVP01_0707400	2	0	0	0	1
PVP01_0711700	2	0	0	0	1
PVP01_0719300	2	0	0	0	1
PVP01_0723900	2	0	0	0	1
PVP01_0734600	2	0	0	0	1
PVP01_0811200	2	0	0	0	1
PVP01_0816400	2	0	0	0	1
PVP01_0829200	2	0	0	0	1
PVP01_0837800	2	0	0	0	1
PVP01_0840200	2	0	0	0	1
PVP01_0902200	2	0	0	0	1
PVP01_0902400	2	0	0	0	1
PVP01_0906100	2	0	0	0	1
PVP01_0922000	2	0	0	0	1
PVP01_0934500	2	0	0	0	1
PVP01_0934800	2	0	0	0	1
PVP01_0936900	2	0	0	0	1
PVP01_0938900	2	0	0	0	1
PVP01_0948900	2	0	0	0	1
PVP01_1006300	2	0	0	0	1
PVP01_1008100	2	0	1	0	0
PVP01_1010200	2	0	0	0	1
PVP01_1015800	2	0	0	0	1
PVP01_1020000	2	0	1	0	0
PVP01_1101300	2	0	0	0	1
PVP01_1101400	2	0	0	0	1
PVP01_1406200	2	0	0	0	1
PVP01_1414400	2	0	0	0	1
PVP01_1427000	2	0	0	0	1
PVP01_1442600	2	0	0	0	1
PVP01_1442700	2	0	0	0	1
PVP01_1443400	2	0	0	0	1
PVP01_1455900	2	0	1	0	0
PVP01_1458200	2	0	0	0	1
PVP01_1470700	2	0	0	0	1
PVP01_0010350	2	0	0	0	1
PVP01_0010470	2	0	0	0	1
PVP01_0004960	2	0	0	0	1
PVP01_0004990	2	0	0	0	1
PVP01_0005060	2	0	0	0	1
PVP01_0005170	2	0	0	0	1
PVP01_0005320	2	0	0	0	1
PVP01_0010740	2	0	0	0	1
PVP01_0005960	2	0	0	0	1
PVP01_0006250	2	0	0	0	1
PVP01_0007470	2	0	0	0	1
PVP01_0001760	2	0	0	0	1
PVP01_0007730	2	0	0	0	1
PVP01_0011120	2	0	0	0	1
PVP01_0008030	2	0	0	0	1
PVP01_0008290	2	0	0	0	1
PVP01_0008980	2	0	0	0	1
PVP01_0009130	2	0	0	0	1
PVP01_0009150	2	0	0	0	1
PVP01_0009320	2	0	0	0	1
PVP01_0002870	2	0	0	0	1
PVP01_0002980	2	0	0	0	1
PVP01_0003200	2	0	0	0	1
PVP01_0003340	2	0	0	0	1
PVP01_0003380	2	0	0	0	1
PVP01_0010220	2	0	0	0	1
PVP01_0112100	2	1	0	0	0
PVP01_0409600	2	1	0	0	0
PVP01_0507500	2	1	0	0	0
PVP01_0512000	2	1	0	0	0
PVP01_0520100	2	1	0	0	0
PVP01_0530900	2	1	0	0	0
PVP01_0606500	2	1	0	0	0
PVP01_0612500	2	1	0	0	0
PVP01_0703100	2	1	0	0	0
PVP01_0805400	2	1	0	0	0
PVP01_0819200	2	1	0	0	0
PVP01_0820900	2	1	0	0	0
PVP01_0825600	2	1	0	0	0
PVP01_0829600	2	1	0	0	0
PVP01_0938500	2	1	0	0	0
PVP01_1016700	2	1	0	0	0
PVP01_1020200	2	1	0	0	0
PVP01_1027400	2	1	0	0	0
PVP01_1135700	2	1	0	0	0
PVP01_1204200	2	1	0	0	0
PVP01_1212800	2	1	0	0	0
PVP01_1213600	2	1	0	0	0
PVP01_1265000	2	1	0	0	0
PVP01_1265800	2	1	0	0	0
PVP01_1338400	2	1	0	0	0
PVP01_1340200	2	1	0	0	0
PVP01_1448400	2	1	0	0	0
PVP01_1452100	2	1	0	0	0
PVP01_1457200	2	1	0	0	0
PVP01_0004250	2	1	0	0	0
PVP01_0100900	2	0	0	0	1
PVP01_0105200	2	0	0	0	1
PVP01_0106500	2	0	1	0	0
PVP01_0108500	2	0	0	0	1
PVP01_0108900	2	0	0	0	1
PVP01_0109800	2	0	0	0	1
PVP01_0112600	2	0	0	0	1
PVP01_0115600	2	0	0	0	1
PVP01_0116000	2	0	0	0	1
PVP01_0118100	2	0	0	0	1
PVP01_0118600	2	0	0	0	1
PVP01_0120400	2	0	0	0	1
PVP01_0122100	2	0	0	0	1
PVP01_0200400	2	0	0	0	1
PVP01_0201800	2	0	0	0	1
PVP01_0201900	2	0	0	0	1
PVP01_0202100	2	0	0	0	1
PVP01_0202600	2	0	0	0	1
PVP01_0204600	2	0	0	0	1
PVP01_0204700	2	0	0	0	1
PVP01_0209000	2	0	0	0	1
PVP01_0212000	2	0	0	0	1
PVP01_0212300	2	0	0	0	1
PVP01_0214500	2	0	0	0	1
PVP01_0214900	2	0	0	0	1
PVP01_0216500	2	0	1	0	0
PVP01_0216900	2	0	0	0	1
PVP01_0217100	2	0	0	0	1
PVP01_0217200	2	0	0	0	1
PVP01_0218700	2	0	0	0	1
PVP01_0218900	2	0	0	0	1
PVP01_0219200	2	0	0	0	1
PVP01_0220200	2	0	0	0	1
PVP01_0300300	2	0	0	0	1
PVP01_0300800	2	0	0	0	1
PVP01_0301500	2	0	0	0	1
PVP01_0303200	2	0	0	0	1
PVP01_0303400	2	0	0	0	1
PVP01_0303500	2	0	0	0	1
PVP01_0304800	2	0	0	0	1
PVP01_0305500	2	0	0	0	1
PVP01_0305800	2	0	0	0	1
PVP01_0308400	2	0	0	0	1
PVP01_0309300	2	0	0	0	1
PVP01_0312100	2	0	0	0	1
PVP01_0312400	2	0	1	0	0
PVP01_0312900	2	0	0	0	1
PVP01_0313000	2	0	1	0	0
PVP01_0314600	2	0	0	0	1
PVP01_0315200	2	0	0	0	1
PVP01_0316900	2	0	0	0	1
PVP01_0318200	2	0	0	0	1
PVP01_0320800	2	0	0	0	1
PVP01_0321000	2	0	0	0	1
PVP01_0401300	2	0	0	0	1
PVP01_0401400	2	0	0	0	1
PVP01_0402900	2	0	0	0	1
PVP01_0403100	2	0	0	0	1
PVP01_0404400	2	0	0	0	1
PVP01_0404700	2	0	0	0	1
PVP01_0404800	2	0	0	0	1
PVP01_0404900	2	0	0	0	1
PVP01_0405800	2	0	1	0	0
PVP01_0407000	2	0	0	0	1
PVP01_0407600	2	0	0	0	1
PVP01_0408500	2	0	0	0	1
PVP01_0408900	2	0	0	0	1
PVP01_0409300	2	0	0	0	1
PVP01_0410100	2	0	0	0	1
PVP01_0411000	2	0	0	0	1
PVP01_0412300	2	0	0	0	1
PVP01_0414600	2	0	0	0	1
PVP01_0414700	2	0	0	0	1
PVP01_0417500	2	0	0	0	1
PVP01_0420200	2	0	0	0	1
PVP01_0423200	2	0	0	0	1
PVP01_0423400	2	0	0	0	1
PVP01_0423500	2	0	0	0	1
PVP01_0500100	2	0	0	0	1
PVP01_0501000	2	0	0	0	1
PVP01_0501600	2	0	0	0	1
PVP01_0502400	2	0	0	0	1
PVP01_0503400	2	0	0	0	1
PVP01_0503600	2	0	0	0	1
PVP01_0503800	2	0	0	0	1
PVP01_0503900	2	0	0	0	1
PVP01_0511700	2	0	1	0	0
PVP01_0513600	2	0	0	0	1
PVP01_0513800	2	0	0	0	1
PVP01_0515200	2	0	0	0	1
PVP01_0516000	2	0	0	0	1
PVP01_0517200	2	0	0	0	1
PVP01_0517700	2	0	0	0	1
PVP01_0517900	2	0	0	0	1
PVP01_0521800	2	0	0	0	1
PVP01_0522700	2	0	0	0	1
PVP01_0523000	2	0	0	0	1
PVP01_0523300	2	0	0	0	1
PVP01_0523500	2	0	0	0	1
PVP01_0524100	2	0	0	0	1
PVP01_0525000	2	0	0	0	1
PVP01_0526300	2	0	0	0	1
PVP01_0528500	2	0	1	0	0
PVP01_0528700	2	0	1	0	0
PVP01_0529000	2	0	0	0	1
PVP01_0531700	2	0	0	0	1
PVP01_0532000	2	0	0	0	1
PVP01_0532200	2	0	0	0	1
PVP01_0532300	2	0	1	0	0
PVP01_0532500	2	0	0	0	1
PVP01_0532700	2	0	1	0	0
PVP01_0532900	2	0	0	0	1
PVP01_0533000	2	0	0	0	1
PVP01_0533300	2	0	0	0	1
PVP01_0533700	2	0	0	0	1
PVP01_0534300	2	0	0	0	1
PVP01_0534400	2	0	0	0	1
PVP01_0534800	2	0	0	0	1
PVP01_0535100	2	0	0	0	1
PVP01_0535400	2	0	0	0	1
PVP01_0601000	2	0	0	0	1
PVP01_0601400	2	0	0	0	1
PVP01_0601600	2	0	0	0	1
PVP01_0601700	2	0	0	0	1
PVP01_0602500	2	0	0	0	1
PVP01_0603400	2	0	0	0	1
PVP01_0604200	2	0	0	0	1
PVP01_0609600	2	0	0	0	1
PVP01_0609900	2	0	0	0	1
PVP01_0614000	2	0	0	0	1
PVP01_0615400	2	0	0	0	1
PVP01_0623000	2	0	0	0	1
PVP01_0623400	2	0	0	0	1
PVP01_0623500	2	0	0	0	1
PVP01_0624900	2	0	0	0	1
PVP01_0700300	2	0	0	0	1
PVP01_0700400	2	0	0	0	1
PVP01_0700800	2	0	0	0	1
PVP01_0701000	2	0	0	0	1
PVP01_0701100	2	0	0	0	1
PVP01_0701200	2	0	0	0	1
PVP01_0701800	2	0	0	0	1
PVP01_0702200	2	0	0	0	1
PVP01_0702600	2	0	0	0	1
PVP01_0703000	2	0	0	0	1
PVP01_0703200	2	0	0	0	1
PVP01_0704500	2	0	0	0	1
PVP01_0705500	2	0	0	0	1
PVP01_0706100	2	0	0	0	1
PVP01_0707300	2	0	0	0	1
PVP01_0707700	2	0	0	0	1
PVP01_0709800	2	0	0	0	1
PVP01_0709900	2	0	0	0	1
PVP01_0710800	2	0	0	0	1
PVP01_0711300	2	0	1	0	0
PVP01_0713000	2	0	0	0	1
PVP01_0713300	2	0	0	0	1
PVP01_0714100	2	0	0	0	1
PVP01_0716100	2	0	0	0	1
PVP01_0716700	2	0	0	0	1
PVP01_0717000	2	0	0	0	1
PVP01_0717600	2	0	0	0	1
PVP01_0719800	2	0	0	0	1
PVP01_0719900	2	0	0	0	1
PVP01_0720100	2	0	0	0	1
PVP01_0721000	2	0	0	0	1
PVP01_0722500	2	0	0	0	1
PVP01_0723100	2	0	0	0	1
PVP01_0724100	2	0	0	0	1
PVP01_0724400	2	0	0	0	1
PVP01_0724900	2	0	0	0	1
PVP01_0726300	2	0	1	0	0
PVP01_0726600	2	0	0	0	1
PVP01_0727500	2	0	0	0	1
PVP01_0731100	2	0	0	0	1
PVP01_0734200	2	0	0	0	1
PVP01_0734400	2	0	1	0	0
PVP01_0736600	2	0	0	0	1
PVP01_0738200	2	0	0	0	1
PVP01_0738500	2	0	0	0	1
PVP01_0738700	2	0	0	0	1
PVP01_0739100	2	0	0	0	1
PVP01_0801000	2	0	0	0	1
PVP01_0801100	2	0	0	0	1
PVP01_0801300	2	0	0	0	1
PVP01_0803700	2	0	0	0	1
PVP01_0803900	2	0	0	0	1
PVP01_0805500	2	1	0	0	0
[truncated: 2,421 more rows]

## Sheet: IESI2_all_occurences
Gene_ID	CDS	5'UTR	3'UTR	Intron	#exons
PVP01_1301600	1			1	34
PVP01_0604700	1	1	1	1	24
PVP01_1244300	1				23
PVP01_1344200	1				22
PVP01_0923200	1				21
PVP01_1124700	1			1	20
PVP01_0927400	1				20
PVP01_1253800	1			1	18
PVP01_0919300		1	1		18
PVP01_0702000	1				17
PVP01_0622200	1				17
PVP01_1269300	1			1	16
PVP01_0828500	1		1		15
PVP01_0410000	1			1	15
PVP01_1345400	1			1	15
PVP01_0928200		1		1	15
PVP01_0611100	1				15
PVP01_1242900	1				15
PVP01_1332500	1				15
PVP01_1346800	1				15
PVP01_1111400	1			1	14
PVP01_0824800	1				14
PVP01_1262900	1				14
PVP01_0904300	1	1			13
PVP01_1126400	1	1			13
PVP01_1241100		1		1	13
PVP01_0922800		1			13
PVP01_0306000	1		1		12
PVP01_1006200			1	1	12
PVP01_1335200	1			1	12
PVP01_1420300	1			1	12
PVP01_0619900	1				12
PVP01_0906000	1				12
PVP01_1243700	1				12
PVP01_1428000	1				12
PVP01_1118700		1		1	11
PVP01_0813500	1				11
PVP01_1005300	1				11
PVP01_1121200	1				11
PVP01_0942200			1		11
PVP01_1209800		1			11
PVP01_0210900		1			11
PVP01_0915000		1			11
PVP01_0702700	1			1	10
PVP01_1223500	1			1	10
PVP01_0422200			1	1	10
PVP01_1437200		1		1	10
PVP01_0822400	1				10
PVP01_1330900		1			10
PVP01_1463400		1			10
PVP01_0311200	1				10
PVP01_0913800	1				10
PVP01_1317600	1				10
PVP01_1337900	1				10
PVP01_0519000			1		10
PVP01_1130600			1		10
PVP01_1018300		1			10
PVP01_1304700		1			10
PVP01_0206600	1		1	1	9
PVP01_0306200	1			1	9
PVP01_1246400	1			1	9
PVP01_0913700			1	1	9
PVP01_1125200			1	1	9
PVP01_0410200		1		1	9
PVP01_0915400		1		1	9
PVP01_1225800		1		1	9
PVP01_0113400			1		9
PVP01_1439600	1				9
PVP01_0527400	1				9
PVP01_0947300	1				9
PVP01_1133700	1				9
PVP01_1405700	1				9
PVP01_1422300	1				9
PVP01_1461900	1				9
PVP01_0812100		1			9
PVP01_0714900			1		9
PVP01_0815800			1		9
PVP01_1021500			1		9
PVP01_1126000			1		9
PVP01_1251000			1		9
PVP01_0304600		1			9
PVP01_0905600		1			9
PVP01_1234500		1			9
PVP01_1254500		1			9
PVP01_1257000		1			9
PVP01_1306800		1			9
PVP01_1346100		1			9
PVP01_0720600	1	1			8
PVP01_1106400	1	1			8
PVP01_1401400	1	1			8
PVP01_0703800	1			1	8
PVP01_0819500			1	1	8
PVP01_1320800		1		1	8
PVP01_0104800	1				8
PVP01_1469200			1		8
PVP01_1133500		1			8
PVP01_1301300	1				8
PVP01_0208000	1				8
PVP01_0313700	1				8
PVP01_0907600	1				8
PVP01_0946800	1				8
PVP01_1204800	1				8
PVP01_1206100	1				8
PVP01_1301700	1				8
PVP01_1319200	1				8
PVP01_0106000			1		8
PVP01_1247200			1		8
PVP01_1310100			1		8
PVP01_1435900			1		8
PVP01_0413600		1			8
PVP01_0806600		1			8
PVP01_0937400		1			8
PVP01_1224500		1			8
PVP01_1260300		1			8
PVP01_1337800		1			8
PVP01_1437600		1			8
PVP01_0407400	1	1	1		7
PVP01_1268600	1	1			7
PVP01_0915900	1		1		7
PVP01_0204500	1	1			7
PVP01_0714700	1			1	7
PVP01_0814100		1	1		7
PVP01_0917500		1	1		7
PVP01_1115200			1	1	7
PVP01_1269500		1		1	7
PVP01_0939800	1				7
PVP01_1254400	1				7
PVP01_1257900		1			7
PVP01_1320900	1				7
PVP01_0110400	1				7
PVP01_0314000	1				7
PVP01_0529300	1				7
PVP01_0702500	1				7
PVP01_1322000	1				7
PVP01_1234000			1		7
PVP01_0919500			1		7
PVP01_1107200			1		7
PVP01_1418500			1		7
PVP01_1440700			1		7
PVP01_1459400			1		7
PVP01_0116900		1			7
PVP01_0413400		1			7
PVP01_0831200		1			7
PVP01_0927700		1			7
PVP01_1315500	1	1		1	6
PVP01_0207800	1	1			6
PVP01_0719700	1			1	6
PVP01_1255300	1	1			6
PVP01_1119800	1			1	6
PVP01_1266700	1			1	6
PVP01_0511800		1	1		6
PVP01_1136100		1		1	6
PVP01_1467600		1	1		6
PVP01_1114000			1	1	6
PVP01_0916900		1		1	6
PVP01_0926400	1				6
PVP01_0708600	1				6
PVP01_0303000	1				6
PVP01_0316400	1				6
PVP01_0607500	1				6
PVP01_0800900	1				6
PVP01_0921200	1				6
PVP01_0921600	1				6
PVP01_0923400	1				6
PVP01_0931400	1				6
PVP01_1012000	1				6
PVP01_1012100	1				6
PVP01_1110800	1				6
PVP01_1235500	1				6
PVP01_1256500	1				6
PVP01_1404600	1				6
PVP01_1428400	1				6
PVP01_1467300	1				6
PVP01_0812000			1		6
PVP01_0509200			1		6
PVP01_0527900			1		6
PVP01_1017500			1		6
PVP01_1221700			1		6
PVP01_1240300			1		6
PVP01_1250000			1		6
PVP01_1445000			1		6
PVP01_0107500		1			6
PVP01_0810500		1			6
PVP01_1013300		1			6
PVP01_1024000		1			6
PVP01_1103600		1			6
PVP01_1242000		1			6
PVP01_1259600		1			6
PVP01_1267300		1			6
PVP01_1411600		1			6
PVP01_0712700	1	1		1	5
PVP01_1442400	1	1			5
PVP01_1206000	1		1		5
PVP01_1430600	1		1		5
PVP01_1437300	1			1	5
PVP01_0304500	1	1			5
PVP01_0307600	1	1			5
PVP01_0607000	1	1			5
PVP01_0910200		1		1	5
PVP01_1222700	1	1			5
PVP01_1242300	1	1			5
PVP01_1336500	1	1			5
PVP01_1245800	1			1	5
PVP01_1265700	1			1	5
PVP01_0206900		1	1		5
PVP01_0419400		1	1		5
PVP01_1010300		1	1		5
PVP01_1143000		1	1		5
PVP01_1310900		1	1		5
PVP01_0407500		1			5
PVP01_0513300		1			5
PVP01_0945400		1			5
PVP01_1141400		1			5
PVP01_1332200		1			5
PVP01_1334400	1				5
PVP01_0717500	1				5
PVP01_0725700			1		5
PVP01_0725900			1		5
PVP01_1248400			1		5
PVP01_0320400	1				5
PVP01_0408300	1				5
PVP01_1110900	1				5
PVP01_1225400	1				5
PVP01_1341200		1			5
PVP01_0112800	1				5
PVP01_0117600	1				5
PVP01_0203700	1				5
PVP01_0212100	1				5
PVP01_0214300	1				5
PVP01_0218000	1				5
PVP01_0320300	1				5
PVP01_0406700	1				5
PVP01_0424100	1				5
PVP01_0530500	1				5
PVP01_0606900	1				5
PVP01_0612800	1				5
PVP01_0623800	1				5
PVP01_0700100	1				5
PVP01_0707500	1				5
PVP01_0800600	1				5
PVP01_0818300	1				5
PVP01_0928800	1				5
PVP01_0930200	1				5
PVP01_0937700	1				5
PVP01_1000200	1				5
PVP01_1015200	1				5
PVP01_1100800	1				5
PVP01_1101100	1				5
PVP01_1146300	1				5
PVP01_1264900	1				5
PVP01_1267900	1				5
PVP01_1302000	1				5
PVP01_1304200	1				5
PVP01_1323400	1				5
PVP01_1404800	1				5
PVP01_1436900	1				5
PVP01_1438700	1				5
PVP01_1441600	1				5
PVP01_1444600	1				5
PVP01_0611300			1		5
PVP01_0946300		1			5
PVP01_1341800			1		5
PVP01_0204100			1		5
PVP01_0606100			1		5
PVP01_0820200			1		5
PVP01_0917600			1		5
PVP01_0936400			1		5
PVP01_1019900			1		5
PVP01_1117400			1		5
PVP01_1137400			1		5
PVP01_1142200			1		5
PVP01_1335900			1		5
PVP01_1417200			1		5
PVP01_0511200		1			5
PVP01_0710000		1			5
PVP01_0714500		1			5
PVP01_0730800		1			5
PVP01_0828600		1			5
PVP01_0905000		1			5
PVP01_1014700		1			5
PVP01_1032000		1			5
PVP01_1334500		1			5
PVP01_1420900		1			5
PVP01_1421400		1			5
PVP01_1456500		1			5
PVP01_0002210	1				5
PVP01_0007830	1				5
PVP01_0008090	1				5
PVP01_0009810	1				5
PVP01_1226200	1	1	1	1	4
PVP01_0214400	1		1	1	4
PVP01_0419200	1		1		4
PVP01_0929600	1			1	4
PVP01_0945600	1		1		4
PVP01_1119200	1		1		4
PVP01_1209700	1		1		4
PVP01_1323600	1		1		4
PVP01_1335700	1		1		4
PVP01_0621400	1	1			4
PVP01_0947200	1	1			4
PVP01_1421900	1	1			4
PVP01_1430400	1	1			4
PVP01_0520600	1			1	4
PVP01_0614200	1			1	4
PVP01_1126900	1			1	4
PVP01_1430000	1			1	4
PVP01_1214400		1	1		4
PVP01_1332900		1	1		4
PVP01_0919700			1	1	4
PVP01_1015600			1	1	4
PVP01_0622400		1		1	4
PVP01_0827100		1		1	4
PVP01_1316000	1				4
PVP01_1459900		1			4
PVP01_1011500	1				4
PVP01_1228500			1		4
PVP01_1304900	1				4
PVP01_0207400	1				4
PVP01_0917400		1			4
PVP01_1251400		1			4
PVP01_1327900	1				4
PVP01_0217400	1				4
PVP01_0300400	1				4
PVP01_0305300	1				4
PVP01_0403500	1				4
PVP01_0403800	1				4
PVP01_0416900	1				4
PVP01_0417100	1				4
PVP01_0417200	1				4
PVP01_0417700	1				4
PVP01_0417900	1				4
PVP01_0500400	1				4
PVP01_0528800	1				4
PVP01_0604500	1				4
PVP01_0729200	1				4
PVP01_0734000	1				4
PVP01_0831500	1				4
PVP01_0939700	1				4
PVP01_0940800	1				4
PVP01_1003600	1				4
PVP01_1024200	1				4
PVP01_1122700	1				4
PVP01_1124500	1				4
PVP01_1146500	1				4
PVP01_1149000	1				4
PVP01_1206800	1				4
PVP01_1209400	1				4
PVP01_1255400	1				4
PVP01_1268200	1				4
PVP01_1307200	1				4
PVP01_1310500	1				4
PVP01_1329500	1				4
PVP01_1335800	1				4
PVP01_1404900	1				4
PVP01_1407600	1				4
PVP01_1432900	1				4
PVP01_1448000	1				4
PVP01_1472300	1				4
PVP01_0309000		1			4
PVP01_0911500			1		4
PVP01_0103100			1		4
PVP01_0208400			1		4
PVP01_0527000			1		4
PVP01_0608100			1		4
PVP01_0718700			1		4
PVP01_0730900			1		4
PVP01_0904900			1		4
PVP01_0906900			1		4
PVP01_0924800			1		4
PVP01_0946000			1		4
PVP01_1232600			1		4
PVP01_1236400			1		4
PVP01_1331000			1		4
PVP01_1332000			1		4
PVP01_1462400			1		4
PVP01_0410800		1			4
PVP01_0416800		1			4
PVP01_0420000		1			4
PVP01_0616800		1			4
PVP01_0622300		1			4
PVP01_0712600		1			4
PVP01_0726500		1			4
PVP01_0731800		1			4
PVP01_0813600				1	4
PVP01_0828900		1			4
PVP01_0833500		1			4
PVP01_1009700		1			4
PVP01_1022300		1			4
PVP01_1024700		1			4
PVP01_1104700		1			4
PVP01_1127200		1			4
PVP01_1211300		1			4
PVP01_1211800		1			4
PVP01_1212900		1			4
PVP01_1308300		1			4
PVP01_1312200		1			4
PVP01_1314300		1			4
PVP01_1426700		1			4
PVP01_0001990	1				4
PVP01_0003020	1				4
PVP01_0003910	1				4
PVP01_0004710	1				4
PVP01_0005220	1				4
PVP01_0006590	1				4
PVP01_0006680	1				4
PVP01_0007460	1				4
PVP01_0007650	1				4
PVP01_0007910	1				4
PVP01_0009580	1				4
PVP01_0621300		1	1	1	3
PVP01_1118100		1	1	1	3
PVP01_0703500	1	1			3
PVP01_1211400	1	1			3
PVP01_1226100	1		1		3
PVP01_0110300	1		1		3
PVP01_0216100	1		1		3
PVP01_1010000	1		1		3
PVP01_1144400	1		1		3
PVP01_1238100	1		1		3
PVP01_1437000	1		1		3
PVP01_0513400	1	1			3
PVP01_0809900	1	1			3
PVP01_0834500	1	1			3
PVP01_0924000	1	1			3
PVP01_1012600	1	1			3
PVP01_1106300	1	1			3
PVP01_1417500	1			1	3
PVP01_0611200		1	1		3
PVP01_0907000		1	1		3
PVP01_0921700		1	1		3
PVP01_1028000		1	1		3
PVP01_1413800		1	1		3
PVP01_1346000	1				3
PVP01_1022900	1				3
PVP01_1114100			1		3
PVP01_1465700	1				3
PVP01_0703300	1				3
PVP01_0706600		1			3
PVP01_0943000		1			3
PVP01_1028900	1				3
PVP01_1106200		1			3
PVP01_1147000	1				3
PVP01_1202300		1			3
PVP01_1248600		1			3
PVP01_1407500	1				3
PVP01_1423500	1				3
PVP01_1466700	1				3
PVP01_0100600	1				3
PVP01_0100700	1				3
PVP01_0113800	1				3
PVP01_0119200	1				3
PVP01_0120200	1				3
PVP01_0120500	1				3
PVP01_0121800	1				3
PVP01_0122200	1				3
PVP01_0200600	1				3
PVP01_0201500	1				3
PVP01_0210400	1				3
PVP01_0211100	1				3
PVP01_0218200	1				3
PVP01_0219700	1				3
PVP01_0221200	1				3
PVP01_0301300	1				3
PVP01_0302600	1				3
PVP01_0304400	1				3
PVP01_0401800	1				3
PVP01_0402300	1				3
PVP01_0412500	1				3
PVP01_0424400	1				3
PVP01_0503200	1				3
PVP01_0600700	1				3
PVP01_0602700	1				3
PVP01_0607400	1				3
PVP01_0623600	1				3
PVP01_0721100	1				3
PVP01_0728000	1				3
PVP01_0729300	1				3
PVP01_0729400	1				3
PVP01_0731500	1				3
PVP01_0737700	1				3
PVP01_0812500	1				3
PVP01_0821800	1				3
PVP01_0824500	1				3
PVP01_0832300	1				3
PVP01_0838600	1				3
PVP01_0839800	1				3
PVP01_0900600	1				3
PVP01_0906300	1				3
PVP01_0911200	1				3
PVP01_0922600	1				3
PVP01_0927100	1				3
PVP01_0947600	1				3
PVP01_0949400	1				3
PVP01_1000300	1				3
PVP01_1000700	1				3
PVP01_1001800	1				3
PVP01_1002300	1				3
PVP01_1008700	1				3
PVP01_1017300	1				3
PVP01_1017800	1				3
PVP01_1027500	1				3
PVP01_1030200	1				3
PVP01_1034500	1				3
PVP01_1127500	1				3
PVP01_1130200	1				3
PVP01_1148700	1				3
PVP01_1200400	1				3
PVP01_1200500	1				3
PVP01_1203100	1				3
PVP01_1206400	1				3
PVP01_1206900	1				3
PVP01_1210000	1				3
PVP01_1212200	1				3
PVP01_1230300	1				3
PVP01_1238900	1				3
PVP01_1250900	1				3
PVP01_1261200	1				3
PVP01_1266200	1				3
PVP01_1268900	1				3
PVP01_1269100	1				3
PVP01_1271900	1				3
PVP01_1274900	1				3
PVP01_1306100	1				3
PVP01_1310000	1				3
PVP01_1310200	1				3
PVP01_1319400	1				3
PVP01_1325600	1				3
PVP01_1331600	1				3
PVP01_1333400	1				3
PVP01_1339800	1				3
PVP01_1347400	1				3
PVP01_1403600	1				3
PVP01_1408700	1				3
PVP01_1421600	1				3
PVP01_1443200	1				3
PVP01_1445900	1				3
PVP01_1449000	1				3
PVP01_1458300	1				3
PVP01_1469500	1				3
PVP01_1469600	1				3
PVP01_0416300		1			3
PVP01_0418200			1		3
PVP01_1003100		1			3
PVP01_1117200			1		3
PVP01_1269600			1		3
PVP01_1410100			1		3
PVP01_1449600		1			3
PVP01_0114200			1		3
PVP01_0316600			1		3
PVP01_0423000			1		3
PVP01_0704200			1		3
PVP01_0925400			1		3
PVP01_0939600			1		3
PVP01_1011400			1		3
PVP01_1033000			1		3
PVP01_1105100			1		3
PVP01_1121600			1		3
PVP01_1234400			1		3
PVP01_1235700			1		3
PVP01_1263700			1		3
PVP01_1269700			1		3
PVP01_1272200			1		3
PVP01_1335600			1		3
PVP01_1407900			1		3
PVP01_1455000			1		3
PVP01_0112300		1			3
PVP01_0204400		1			3
PVP01_0319300		1			3
PVP01_0407700		1			3
PVP01_0507600		1			3
PVP01_0510100		1			3
PVP01_0512600		1			3
PVP01_0513000		1			3
PVP01_0525400		1			3
PVP01_0527800		1			3
PVP01_0605400		1			3
PVP01_0605900		1			3
PVP01_0621000		1			3
PVP01_0706500		1			3
PVP01_0711900		1			3
PVP01_0717400		1			3
PVP01_0812800		1			3
PVP01_0823800		1			3
PVP01_0828400		1			3
PVP01_0833200		1			3
PVP01_0835700		1			3
PVP01_0946200		1			3
PVP01_1013600		1			3
PVP01_1016600		1			3
PVP01_1029800		1			3
PVP01_1119600		1			3
PVP01_1128100		1			3
PVP01_1137900		1			3
PVP01_1138000		1			3
PVP01_1141800		1			3
PVP01_1144700		1			3
PVP01_1240500		1			3
PVP01_1240900		1			3
PVP01_1246500		1			3
PVP01_1262700		1			3
PVP01_1333800		1			3
PVP01_1410200		1			3
PVP01_1427600		1			3
PVP01_1434300		1			3
PVP01_1466200		1			3
PVP01_0000430	1				3
PVP01_0000600	1				3
PVP01_0000670	1				3
PVP01_0000990	1				3
PVP01_0001230	1				3
PVP01_0001320	1				3
PVP01_0001360	1				3
PVP01_0001380	1				3
PVP01_0001590	1				3
PVP01_0001830	1				3
PVP01_0002120	1				3
PVP01_0002240	1				3
PVP01_0002290	1				3
PVP01_0002320	1				3
PVP01_0002360	1				3
PVP01_0002890	1				3
PVP01_0002900	1				3
PVP01_0002940	1				3
PVP01_0003080	1				3
PVP01_0003230	1				3
PVP01_0003480	1				3
PVP01_0003490	1				3
PVP01_0003570	1				3
PVP01_0003640	1				3
PVP01_0003720	1				3
PVP01_0003930	1				3
PVP01_0004070	1				3
PVP01_0004350	1				3
PVP01_0004540	1				3
PVP01_0005270	1				3
PVP01_0005640	1				3
PVP01_0005760	1				3
PVP01_0006030	1				3
PVP01_0006090	1				3
PVP01_0006100	1				3
PVP01_0006110	1				3
PVP01_0006420	1				3
PVP01_0006610	1				3
PVP01_0007350	1				3
PVP01_0007410	1				3
PVP01_0007560	1				3
PVP01_0007660	1				3
PVP01_0008050	1				3
PVP01_0008190	1				3
PVP01_0008350	1				3
PVP01_0008370	1				3
PVP01_0008390	1				3
PVP01_0009300	1				3
PVP01_0009360	1				3
PVP01_0009680	1				3
PVP01_0010160	1				3
PVP01_0010170	1				3
PVP01_0010250	1				3
PVP01_0010320	1				3
PVP01_0010420	1				3
PVP01_0010440	1				3
PVP01_0010450	1				3
PVP01_0000170			1		3
PVP01_0939500	1	1		1	2
PVP01_1253300	1	1	1		2
PVP01_0615500	1		1	1	2
PVP01_1119700	1		1	1	2
PVP01_0912600		1	1	1	2
PVP01_0938500		1	1	1	2
PVP01_0532900		1	1		2
PVP01_1016000		1	1		2
PVP01_1108600	1	1			2
PVP01_1227800	1	1			2
PVP01_1233700	1	1			2
PVP01_1312500	1		1		2
PVP01_1405300	1	1			2
PVP01_0709600	1		1		2
PVP01_0809800	1		1		2
PVP01_0918500	1		1		2
PVP01_0933000	1		1		2
PVP01_0933900	1		1		2
PVP01_0938900	1		1		2
PVP01_1147500	1		1		2
PVP01_1236000	1		1		2
PVP01_1259000	1		1		2
PVP01_1338600	1		1		2
PVP01_1345000	1		1		2
PVP01_1409400	1		1		2
PVP01_0423400	1	1			2
PVP01_0509300	1	1			2
PVP01_0509800	1	1			2
PVP01_0729100	1	1			2
PVP01_0801800	1	1			2
PVP01_0832200	1	1			2
PVP01_0834100	1	1			2
PVP01_0934600	1	1			2
PVP01_1014400	1	1			2
PVP01_1209200	1	1			2
PVP01_1217200	1	1			2
PVP01_1264400	1	1			2
PVP01_1307400	1	1			2
PVP01_1332600	1	1			2
PVP01_1407800	1	1			2
PVP01_1428700	1	1			2
PVP01_1441100	1	1			2
PVP01_1458800	1			1	2
PVP01_0813200	1			1	2
PVP01_0812300		1	1		2
PVP01_0825600		1	1		2
PVP01_0940000		1	1		2
PVP01_1109800		1	1		2
PVP01_1250500		1	1		2
PVP01_1450300		1	1		2
PVP01_0801200			1	1	2
PVP01_1318100			1	1	2
PVP01_1257800		1		1	2
PVP01_0004290	1		1		2
PVP01_0923700		1			2
PVP01_1016700			1		2
PVP01_1251500			1		2
PVP01_1258600	1				2
PVP01_1337600			1		2
PVP01_0105700			1		2
PVP01_0201200	1				2
PVP01_0503700	1				2
PVP01_0906100	1				2
PVP01_0913100			1		2
PVP01_0925300	1				2
PVP01_1125900	1				2
PVP01_1208400	1				2
PVP01_1212400			1		2
PVP01_1234900			1		2
PVP01_1239200			1		2
PVP01_1269200	1				2
PVP01_1331100	1				2
PVP01_1401600			1		2
PVP01_1406200			1		2
PVP01_1413700	1				2
PVP01_1456300	1				2
PVP01_0118100		1			2
PVP01_0209000	1				2
PVP01_0405000	1				2
PVP01_0703000	1				2
PVP01_0703200		1			2
PVP01_0716100	1				2
PVP01_0718200		1			2
PVP01_0729600		1			2
PVP01_0934800		1			2
PVP01_0936000	1				2
PVP01_0942000	1				2
PVP01_1009100		1			2
PVP01_1101400		1			2
PVP01_1240700	1				2
PVP01_1306300	1				2
PVP01_1312300	1				2
PVP01_1316100		1			2
PVP01_1331700	1				2
PVP01_1338200		1			2
PVP01_1467900	1				2
PVP01_0115600	1				2
PVP01_0116000	1				2
PVP01_0120400	1				2
PVP01_0204600	1				2
PVP01_0212000	1				2
PVP01_0215400	1				2
PVP01_0300700	1				2
PVP01_0302900	1				2
PVP01_0304200	1				2
PVP01_0304800	1				2
PVP01_0316700	1				2
PVP01_0319800	1				2
PVP01_0320800	1				2
PVP01_0400600	1				2
PVP01_0401400	1				2
PVP01_0404700	1				2
PVP01_0408900	1				2
PVP01_0422900	1				2
PVP01_0423600	1				2
PVP01_0423900	1				2
PVP01_0501600	1				2
PVP01_0503400	1				2
PVP01_0503600	1				2
PVP01_0506800	1				2
PVP01_0516500	1				2
PVP01_0516900	1				2
PVP01_0517700	1				2
PVP01_0517900	1				2
PVP01_0523100	1				2
PVP01_0524100	1				2
PVP01_0524600	1				2
PVP01_0532000	1				2
PVP01_0533300	1				2
PVP01_0534300	1				2
PVP01_0534400	1				2
PVP01_0534700	1				2
PVP01_0534800	1				2
PVP01_0600900	1				2
PVP01_0602400	1				2
PVP01_0609000	1				2
PVP01_0624000	1				2
PVP01_0624200	1				2
PVP01_0624700	1				2
PVP01_0624900	1				2
PVP01_0700900	1				2
PVP01_0701100	1				2
PVP01_0701200	1				2
PVP01_0704500	1				2
PVP01_0712300	1				2
PVP01_0714600	1				2
PVP01_0719900	1				2
PVP01_0734900	1				2
PVP01_0736800	1				2
PVP01_0800700	1				2
PVP01_0801100	1				2
PVP01_0802600	1				2
PVP01_0803900	1				2
PVP01_0811900	1				2
PVP01_0814400	1				2
PVP01_0822200	1				2
PVP01_0823900	1				2
PVP01_0828800	1				2
PVP01_0830700	1				2
PVP01_0837800	1				2
PVP01_0901500	1				2
PVP01_0902000	1				2
PVP01_0903100	1				2
PVP01_0908100	1				2
PVP01_0911000	1				2
PVP01_0920900	1				2
PVP01_0923500	1				2
PVP01_0925500	1				2
PVP01_0934700	1				2
PVP01_0936900	1				2
PVP01_0937200	1				2
PVP01_0944900	1				2
PVP01_0946900	1				2
PVP01_0949100	1				2
PVP01_1001000	1				2
PVP01_1003200	1				2
PVP01_1004200	1				2
PVP01_1006600	1				2
PVP01_1010700	1				2
PVP01_1027400	1				2
PVP01_1032300	1				2
PVP01_1034000	1				2
PVP01_1034400	1				2
PVP01_1118400	1				2
PVP01_1129500	1				2
PVP01_1140000	1				2
PVP01_1140900	1				2
PVP01_1144300	1				2
PVP01_1147600	1				2
PVP01_1148500	1				2
PVP01_1213600	1				2
PVP01_1219000	1				2
PVP01_1234600	1				2
PVP01_1249300	1				2
PVP01_1252300	1				2
PVP01_1253400	1				2
PVP01_1263800	1				2
PVP01_1264300	1				2
PVP01_1270300	1				2
PVP01_1271100	1				2
PVP01_1271400	1				2
PVP01_1307000	1				2
PVP01_1307300	1				2
PVP01_1310800	1				2
PVP01_1322500	1				2
PVP01_1325500	1				2
PVP01_1330000	1				2
PVP01_1334100	1				2
PVP01_1340000	1				2
PVP01_1340300	1				2
PVP01_1401000	1				2
PVP01_1402100	1				2
PVP01_1402400	1				2
PVP01_1404400	1				2
PVP01_1406300	1				2
PVP01_1409200	1				2
PVP01_1413100	1				2
PVP01_1414000	1				2
PVP01_1414400	1				2
PVP01_1414700	1				2
PVP01_1429100	1				2
PVP01_1438600	1				2
PVP01_1441800	1				2
PVP01_1443700	1				2
PVP01_1445400	1				2
PVP01_1446800	1				2
PVP01_1446900	1				2
PVP01_1451400	1				2
PVP01_1455900	1				2
PVP01_1461500	1				2
PVP01_1469800	1				2
PVP01_1470700	1				2
PVP01_1471600	1				2
PVP01_1472100	1				2
PVP01_0108700			1		2
PVP01_0309300		1			2
PVP01_0511700			1		2
PVP01_0512900			1		2
PVP01_0520100			1		2
PVP01_0532800			1		2
PVP01_0623000			1		2
PVP01_0706400			1		2
PVP01_0807000			1		2
PVP01_0813000		1			2
PVP01_0934000		1			2
PVP01_1251200		1			2
PVP01_1329200			1		2
PVP01_1344600		1			2
PVP01_1413900		1			2
PVP01_0111000			1		2
PVP01_0119500			1		2
PVP01_0202200			1		2
PVP01_0214500			1		2
PVP01_0214900			1		2
PVP01_0216500			1		2
PVP01_0304900			1		2
PVP01_0309600			1		2
PVP01_0314100			1		2
PVP01_0318200			1		2
PVP01_0404200			1		2
PVP01_0405500			1		2
PVP01_0405800			1		2
PVP01_0423200			1		2
PVP01_0510600			1		2
PVP01_0517500			1		2
PVP01_0532300			1		2
PVP01_0601700			1		2
PVP01_0612500			1		2
PVP01_0613500			1		2
PVP01_0623700			1		2
PVP01_0717600			1		2
PVP01_0726400			1		2
PVP01_0801000			1		2
PVP01_0810100			1		2
PVP01_0812400			1		2
PVP01_0838000			1		2
PVP01_0838200			1		2
PVP01_0918700			1		2
PVP01_0921000			1		2
PVP01_0935500			1		2
PVP01_0949200			1		2
PVP01_1003300			1		2
PVP01_1108700			1		2
PVP01_1112500			1		2
PVP01_1201600			1		2
PVP01_1205100			1		2
PVP01_1207300			1		2
PVP01_1220800			1		2
PVP01_1223400			1		2
PVP01_1232900			1		2
PVP01_1235400			1		2
PVP01_1243600			1		2
PVP01_1244100			1		2
PVP01_1312800			1		2
PVP01_1316600			1		2
PVP01_1344700			1		2
PVP01_1402700			1		2
PVP01_1410800			1		2
PVP01_1432800			1		2
PVP01_1443100			1		2
PVP01_1459800			1		2
PVP01_1466300			1		2
PVP01_1469700			1		2
PVP01_1471900			1		2
PVP01_0114800		1			2
PVP01_0115900		1			2
PVP01_0117000		1			2
PVP01_0305500		1			2
PVP01_0316000		1			2
PVP01_0317300		1			2
PVP01_0407000		1			2
PVP01_0409600		1			2
PVP01_0412300		1			2
PVP01_0412700		1			2
PVP01_0423300		1			2
PVP01_0513200		1			2
PVP01_0523900		1			2
PVP01_0529000		1			2
PVP01_0701800		1			2
PVP01_0702900		1			2
PVP01_0717000		1			2
PVP01_0724900		1			2
PVP01_0803300		1			2
PVP01_0805500		1			2
PVP01_0808100		1			2
PVP01_0808600		1			2
PVP01_0927900		1			2
PVP01_1014500		1			2
PVP01_1020200		1			2
PVP01_1030500		1			2
PVP01_1102700		1			2
PVP01_1106500		1			2
PVP01_1113100		1			2
PVP01_1117500		1			2
PVP01_1117900		1			2
PVP01_1118600		1			2
PVP01_1130100		1			2
PVP01_1135700		1			2
PVP01_1201700		1			2
PVP01_1209000		1			2
PVP01_1217800		1			2
PVP01_1222500		1			2
PVP01_1249700		1			2
PVP01_1256800		1			2
PVP01_1261100		1			2
PVP01_1265000		1			2
PVP01_1267100		1			2
PVP01_1321400		1			2
PVP01_1329600		1			2
PVP01_1338400		1			2
PVP01_1340200		1			2
PVP01_1340600		1			2
PVP01_1412500		1			2
PVP01_1444800		1			2
PVP01_1446500		1			2
PVP01_1450700		1			2
PVP01_1462200		1			2
PVP01_0000260	1				2
PVP01_0001760	1				2
PVP01_0003130	1				2
PVP01_0004560	1				2
PVP01_0005120	1				2
PVP01_0005380	1				2
PVP01_0005480	1				2
PVP01_0005990	1				2
PVP01_0006340	1				2
PVP01_0006350	1				2
PVP01_0006450	1				2
PVP01_0007010	1				2
PVP01_0007810	1				2
PVP01_0007950	1				2
PVP01_0008290	1				2
PVP01_0009290	1				2
PVP01_0009370	1				2
PVP01_0009490	1				2
PVP01_0009920	1				2
PVP01_0010060	1				2
PVP01_0010190	1				2
PVP01_0010340	1				2
PVP01_0010500	1				2
PVP01_0003380		1			2
PVP01_0000100			1		2
PVP01_0000160			1		2
PVP01_0004220			1		2
PVP01_0710500	1	1	1		1
PVP01_1121400	1	1	1		1
PVP01_1238700	1	1	1		1
PVP01_1440800	1	1	1		1
PVP01_1455600	1	1	1		1
PVP01_0106700		1	1		1
PVP01_0213600	1		1		1
PVP01_0406800		1	1		1
PVP01_0409500	1		1		1
PVP01_0621500	1	1			1
PVP01_0814700	1		1		1
PVP01_1109700	1		1		1
PVP01_1113200	1	1			1
PVP01_1115900	1		1		1
PVP01_1119100	1		1		1
PVP01_1219300	1		1		1
PVP01_1243900	1	1			1
PVP01_1249800	1	1			1
PVP01_1409900	1	1			1
PVP01_1425200		1	1		1
PVP01_1431100		1	1		1
PVP01_0104300	1		1		1
PVP01_0110500	1		1		1
PVP01_0210500	1		1		1
PVP01_0211300	1		1		1
PVP01_0309100	1		1		1
PVP01_0508300	1		1		1
PVP01_0616400	1		1		1
PVP01_0708700	1		1		1
PVP01_0810300	1		1		1
PVP01_0920500	1		1		1
PVP01_0921300	1		1		1
PVP01_0922400	1		1		1
PVP01_0941000	1		1		1
PVP01_0943800	1		1		1
PVP01_1107600	1		1		1
PVP01_1119400	1		1		1
PVP01_1123500	1		1		1
PVP01_1128200	1		1		1
PVP01_1207600	1		1		1
PVP01_1227200	1		1		1
PVP01_1259200	1		1		1
PVP01_1270000	1		1		1
PVP01_1322300	1		1		1
PVP01_1426500	1		1		1
PVP01_1440100	1		1		1
PVP01_1465800	1		1		1
PVP01_1468600	1		1		1
PVP01_0104600	1	1			1
PVP01_0115000	1	1			1
PVP01_0206500	1	1			1
PVP01_0208900	1	1			1
PVP01_0212800	1	1			1
PVP01_0311800	1	1			1
PVP01_0518200	1	1			1
PVP01_0532100	1	1			1
PVP01_0612900	1	1			1
PVP01_0619500	1	1			1
PVP01_0701700	1	1			1
PVP01_0718400	1	1			1
PVP01_0821600	1	1			1
PVP01_0836000	1	1			1
PVP01_0904400	1	1			1
PVP01_0904600	1	1			1
PVP01_0915600	1	1			1
PVP01_0916700	1	1			1
PVP01_0924200	1	1			1
PVP01_0924400	1	1			1
PVP01_0929500	1	1			1
PVP01_0931200	1	1			1
PVP01_0936100	1	1			1
PVP01_0944000	1	1			1
PVP01_0945300	1	1			1
PVP01_0947900	1	1			1
PVP01_1002700	1	1			1
PVP01_1023900	1	1			1
PVP01_1025700	1	1			1
PVP01_1029600	1	1			1
PVP01_1103500	1	1			1
PVP01_1112200	1	1			1
PVP01_1119000	1	1			1
PVP01_1121300	1	1			1
PVP01_1202100	1	1			1
PVP01_1208300	1	1			1
PVP01_1235200	1	1			1
PVP01_1241300	1	1			1
PVP01_1244400	1	1			1
PVP01_1249600	1	1			1
PVP01_1253100	1	1			1
PVP01_1258700	1	1			1
PVP01_1308000	1	1			1
PVP01_1308200	1	1			1
PVP01_1311100	1	1			1
PVP01_1312100	1	1			1
PVP01_1322800	1	1			1
PVP01_1329000	1	1			1
PVP01_1329900	1	1			1
PVP01_1334300	1	1			1
PVP01_1404200	1	1			1
PVP01_1419200	1	1			1
PVP01_1421800	1	1			1
PVP01_1428200	1	1			1
PVP01_1431800	1	1			1
PVP01_1456900	1	1			1
PVP01_0103400		1	1		1
PVP01_0815500		1	1		1
PVP01_0824700		1	1		1
PVP01_0905800		1	1		1
PVP01_0943600		1	1		1
PVP01_1124900		1	1		1
PVP01_1221000		1	1		1
PVP01_1308400		1	1		1
PVP01_1338300		1	1		1
PVP01_1413300		1	1		1
PVP01_1424100		1	1		1
PVP01_1427400		1	1		1
PVP01_1436800		1	1		1
PVP01_1440200		1	1		1
PVP01_1445300		1	1		1
PVP01_1465300		1	1		1
PVP01_0713800		1			1
PVP01_0837700	1				1
PVP01_1204300		1			1
PVP01_1209900	1				1
PVP01_1321800	1				1
PVP01_1338900		1			1
PVP01_1457000		1			1
PVP01_1457500	1				1
PVP01_0117200			1		1
PVP01_0203800	1				1
PVP01_0310600	1				1
PVP01_0508000	1				1
PVP01_0614500	1				1
PVP01_0618600	1				1
PVP01_0704400			1		1
PVP01_0707600			1		1
PVP01_0710700			1		1
PVP01_0712500	1				1
PVP01_0729700	1				1
PVP01_0804700	1				1
PVP01_0836700	1				1
PVP01_0940500			1		1
PVP01_1112300			1		1
PVP01_1117700	1				1
PVP01_1127300	1				1
PVP01_1136500			1		1
PVP01_1142900	1				1
PVP01_1204100	1				1
PVP01_1205000	1				1
PVP01_1236100	1				1
PVP01_1263200			1		1
PVP01_1264800	1				1
PVP01_1267500			1		1
PVP01_1301100	1				1
PVP01_1304500	1				1
PVP01_1306700			1		1
PVP01_1309400	1				1
PVP01_1314900			1		1
PVP01_1333500	1				1
PVP01_1407100	1				1
PVP01_1408200	1				1
PVP01_1420600	1				1
PVP01_1437800	1				1
PVP01_1437900	1				1
PVP01_1445800			1		1
PVP01_1467700	1				1
PVP01_0103900		1			1
PVP01_0104500	1				1
PVP01_0112200	1				1
PVP01_0118300	1				1
PVP01_0308700		1			1
PVP01_0311100	1				1
PVP01_0409200	1				1
PVP01_0421000	1				1
PVP01_0506600		1			1
PVP01_0522300		1			1
PVP01_0525700	1				1
PVP01_0615000		1			1
PVP01_0701900	1				1
PVP01_0718300	1				1
PVP01_0722300	1				1
PVP01_0803600		1			1
PVP01_0809100		1			1
PVP01_0815100		1			1
PVP01_0821900	1				1
PVP01_0910900	1				1
PVP01_0911900		1			1
PVP01_0929400		1			1
PVP01_0935000	1				1
PVP01_0937500		1			1
PVP01_0942300		1			1
PVP01_1002400	1				1
PVP01_1022400		1			1
PVP01_1139100		1			1
PVP01_1146900	1				1
PVP01_1205500	1				1
PVP01_1209100		1			1
PVP01_1221500	1				1
PVP01_1237400		1			1
PVP01_1253200	1				1
PVP01_1261600		1			1
PVP01_1264100		1			1
PVP01_1303800		1			1
PVP01_1308500		1			1
PVP01_1311500		1			1
PVP01_1313900		1			1
PVP01_1314700		1			1
PVP01_1322200		1			1
PVP01_1340900	1				1
PVP01_1407300		1			1
PVP01_1417400	1				1
PVP01_1420000	1				1
PVP01_1429900	1				1
PVP01_1431000		1			1
PVP01_1431700	1				1
PVP01_1436400		1			1
PVP01_1440600		1			1
PVP01_0103200	1				1
PVP01_0103500	1				1
PVP01_0103700	1				1
PVP01_0104000	1				1
PVP01_0104100	1				1
PVP01_0104700	1				1
PVP01_0105000	1				1
PVP01_0105400	1				1
PVP01_0107700	1				1
PVP01_0109100	1				1
PVP01_0110000	1				1
PVP01_0110600	1				1
PVP01_0111300	1				1
PVP01_0113700	1				1
PVP01_0115400	1				1
PVP01_0203000	1				1
PVP01_0204900	1				1
PVP01_0206700	1				1
PVP01_0211600	1				1
PVP01_0212600	1				1
PVP01_0213800	1				1
PVP01_0214800	1				1
PVP01_0216200	1				1
PVP01_0302700	1				1
PVP01_0302800	1				1
PVP01_0303100	1				1
PVP01_0304700	1				1
PVP01_0305100	1				1
PVP01_0310000	1				1
PVP01_0310100	1				1
PVP01_0310700	1				1
PVP01_0313600	1				1
PVP01_0318300	1				1
PVP01_0319100	1				1
PVP01_0319700	1				1
PVP01_0320600	1				1
PVP01_0406400	1				1
PVP01_0408100	1				1
PVP01_0409000	1				1
PVP01_0412400	1				1
PVP01_0413500	1				1
PVP01_0414200	1				1
PVP01_0416400	1				1
PVP01_0418700	1				1
PVP01_0420500	1				1
PVP01_0421900	1				1
PVP01_0422000	1				1
PVP01_0422400	1				1
PVP01_0504800	1				1
PVP01_0504900	1				1
PVP01_0505000	1				1
PVP01_0506100	1				1
PVP01_0506700	1				1
PVP01_0507100	1				1
PVP01_0508200	1				1
PVP01_0508600	1				1
PVP01_0509500	1				1
PVP01_0510500	1				1
PVP01_0514900	1				1
PVP01_0518100	1				1
PVP01_0518700	1				1
PVP01_0519400	1				1
PVP01_0519500	1				1
PVP01_0521700	1				1
PVP01_0526800	1				1
PVP01_0530700	1				1
PVP01_0531500	1				1
PVP01_0604300	1				1
PVP01_0604900	1				1
PVP01_0607100	1				1
PVP01_0607900	1				1
PVP01_0608300	1				1
PVP01_0609300	1				1
PVP01_0609400	1				1
PVP01_0610500	1				1
PVP01_0611800	1				1
PVP01_0612100	1				1
PVP01_0614400	1				1
PVP01_0617800	1				1
PVP01_0618700	1				1
PVP01_0619100	1				1
PVP01_0620200	1				1
PVP01_0620300	1				1
PVP01_0620900	1				1
PVP01_0622500	1				1
PVP01_0703700	1				1
PVP01_0707100	1				1
PVP01_0707900	1				1
PVP01_0708500	1				1
PVP01_0709200	1				1
PVP01_0710300	1				1
PVP01_0711600	1				1
PVP01_0712400	1				1
PVP01_0713700	1				1
PVP01_0714800	1				1
PVP01_0715900	1				1
PVP01_0718800	1				1
PVP01_0720700	1				1
PVP01_0721700	1				1
PVP01_0722700	1				1
PVP01_0727200	1				1
PVP01_0728500	1				1
PVP01_0730500	1				1
PVP01_0809200	1				1
PVP01_0809600	1				1
PVP01_0815000	1				1
PVP01_0815600	1				1
PVP01_0816800	1				1
PVP01_0818700	1				1
PVP01_0824300	1				1
PVP01_0825400	1				1
PVP01_0826300	1				1
PVP01_0827300	1				1
PVP01_0833700	1				1
PVP01_0835400	1				1
PVP01_0835900	1				1
PVP01_0837100	1				1
PVP01_0907200	1				1
PVP01_0907500	1				1
PVP01_0908500	1				1
PVP01_0911800	1				1
PVP01_0912900	1				1
PVP01_0914300	1				1
PVP01_0914600	1				1
PVP01_0915200	1				1
PVP01_0916100	1				1
PVP01_0917800	1				1
PVP01_0922100	1				1
PVP01_0922500	1				1
PVP01_0930600	1				1
PVP01_0930700	1				1
PVP01_0932400	1				1
PVP01_0932800	1				1
PVP01_0932900	1				1
PVP01_0935100	1				1
PVP01_0935400	1				1
PVP01_0935900	1				1
PVP01_0939000	1				1
PVP01_0939400	1				1
PVP01_0939900	1				1
PVP01_0940300	1				1
PVP01_0941400	1				1
PVP01_0942700	1				1
PVP01_0942800	1				1
PVP01_0944300	1				1
PVP01_0945100	1				1
PVP01_0945500	1				1
PVP01_0946500	1				1
PVP01_0947000	1				1
PVP01_0947100	1				1
PVP01_0947800	1				1
PVP01_0948100	1				1
PVP01_1003500	1				1
PVP01_1005000	1				1
PVP01_1007300	1				1
PVP01_1008400	1				1
PVP01_1011000	1				1
PVP01_1011300	1				1
PVP01_1011800	1				1
PVP01_1014900	1				1
PVP01_1016100	1				1
PVP01_1016200	1				1
PVP01_1016500	1				1
PVP01_1017200	1				1
PVP01_1017700	1				1
PVP01_1018000	1				1
PVP01_1019100	1				1
PVP01_1021100	1				1
PVP01_1022500	1				1
PVP01_1023500	1				1
PVP01_1024900	1				1
PVP01_1025100	1				1
PVP01_1025300	1				1
PVP01_1026200	1				1
PVP01_1028600	1				1
PVP01_1029200	1				1
PVP01_1029300	1				1
PVP01_1030700	1				1
PVP01_1031000	1				1
PVP01_1031200	1				1
PVP01_1033200	1				1
PVP01_1034300	1				1
PVP01_1103200	1				1
PVP01_1105400	1				1
PVP01_1107800	1				1
PVP01_1109300	1				1
PVP01_1113300	1				1
PVP01_1114400	1				1
PVP01_1115100	1				1
PVP01_1117000	1				1
PVP01_1118500	1				1
PVP01_1120200	1				1
PVP01_1121900	1				1
PVP01_1124200	1				1
PVP01_1125600	1				1
PVP01_1125700	1				1
PVP01_1125800	1				1
PVP01_1126500	1				1
PVP01_1132600	1				1
PVP01_1134900	1				1
PVP01_1136200	1				1
PVP01_1137600	1				1
PVP01_1139900	1				1
PVP01_1141300	1				1
PVP01_1144600	1				1
PVP01_1144800	1				1
PVP01_1202800	1				1
PVP01_1203600	1				1
PVP01_1205600	1				1
PVP01_1211000	1				1
PVP01_1211900	1				1
PVP01_1213200	1				1
PVP01_1215500	1				1
PVP01_1221100	1				1
PVP01_1221400	1				1
PVP01_1221600	1				1
PVP01_1221800	1				1
PVP01_1224000	1				1
PVP01_1224700	1				1
PVP01_1224900	1				1
PVP01_1227000	1				1
PVP01_1227100	1				1
PVP01_1227900	1				1
PVP01_1235100	1				1
PVP01_1247500	1				1
PVP01_1247800	1				1
PVP01_1248300	1				1
PVP01_1249000	1				1
PVP01_1249500	1				1
PVP01_1250400	1				1
PVP01_1253000	1				1
PVP01_1255800	1				1
PVP01_1260500	1				1
PVP01_1261900	1				1
PVP01_1263400	1				1
PVP01_1263500	1				1
PVP01_1264000	1				1
PVP01_1264600	1				1
PVP01_1270100	1				1
PVP01_1270500	1				1
PVP01_1271500	1				1
PVP01_1300800	1				1
PVP01_1301500	1				1
PVP01_1302300	1				1
PVP01_1302600	1				1
PVP01_1305000	1				1
PVP01_1306900	1				1
PVP01_1308700	1				1
PVP01_1309200	1				1
PVP01_1309600	1				1
PVP01_1311900	1				1
PVP01_1313000	1				1
PVP01_1313300	1				1
PVP01_1314200	1				1
PVP01_1314500	1				1
PVP01_1315000	1				1
PVP01_1315700	1				1
PVP01_1318200	1				1
PVP01_1319100	1				1
PVP01_1323700	1				1
PVP01_1327200	1				1
PVP01_1328500	1				1
PVP01_1328700	1				1
PVP01_1328800	1				1
PVP01_1329400	1				1
PVP01_1329800	1				1
PVP01_1330800	1				1
PVP01_1331300	1				1
PVP01_1332300	1				1
PVP01_1334000	1				1
PVP01_1335500	1				1
PVP01_1337300	1				1
PVP01_1338700	1				1
PVP01_1339400	1				1
PVP01_1343500	1				1
PVP01_1345700	1				1
PVP01_1346700	1				1
PVP01_1403800	1				1
PVP01_1404700	1				1
PVP01_1407400	1				1
PVP01_1408800	1				1
PVP01_1409600	1				1
PVP01_1410000	1				1
PVP01_1411100	1				1
PVP01_1411700	1				1
PVP01_1412600	1				1
PVP01_1413400	1				1
PVP01_1414900	1				1
PVP01_1415100	1				1
PVP01_1418100	1				1
PVP01_1418400	1				1
PVP01_1419900	1				1
PVP01_1421500	1				1
PVP01_1422100	1				1
PVP01_1423200	1				1
PVP01_1423300	1				1
PVP01_1423700	1				1
PVP01_1425300	1				1
PVP01_1426600	1				1
PVP01_1427200	1				1
PVP01_1427800	1				1
PVP01_1428500	1				1
PVP01_1429000	1				1
PVP01_1429200	1				1
PVP01_1430700	1				1
PVP01_1432200	1				1
PVP01_1434500	1				1
PVP01_1436000	1				1
PVP01_1436100	1				1
PVP01_1437100	1				1
PVP01_1437500	1				1
PVP01_1438400	1				1
PVP01_1438800	1				1
PVP01_1440300	1				1
PVP01_1442900	1				1
PVP01_1445200	1				1
PVP01_1445600	1				1
PVP01_1445700	1				1
PVP01_1447000	1				1
PVP01_1452200	1				1
PVP01_1452300	1				1
PVP01_1453400	1				1
PVP01_1453500	1				1
PVP01_1455300	1				1
PVP01_1456700	1				1
PVP01_1457300	1				1
PVP01_1457400	1				1
PVP01_1457900	1				1
PVP01_1459300	1				1
PVP01_1462300	1				1
PVP01_1462700	1				1
PVP01_1463600	1				1
PVP01_1463800	1				1
PVP01_1468000	1				1
PVP01_1468500	1				1
PVP01_1468900	1				1
PVP01_1472400	1				1
PVP01_0103600		1			1
PVP01_0104400		1			1
PVP01_0108100		1			1
PVP01_0216600		1			1
PVP01_0316100			1		1
PVP01_0412000		1			1
PVP01_0509400		1			1
PVP01_0602200			1		1
PVP01_0604800		1			1
PVP01_0621800		1			1
PVP01_0704300		1			1
PVP01_0705100			1		1
PVP01_0708000		1			1
PVP01_0710100			1		1
PVP01_0804600			1		1
PVP01_0812700		1			1
PVP01_0821200		1			1
PVP01_0824600		1			1
PVP01_0916450		1			1
PVP01_0918000		1			1
PVP01_1003700			1		1
PVP01_1111000		1			1
PVP01_1122400		1			1
PVP01_1211200			1		1
PVP01_1215800			1		1
PVP01_1223900		1			1
PVP01_1233900		1			1
PVP01_1313200		1			1
PVP01_1323500			1		1
PVP01_1325900		1			1
PVP01_1332800		1			1
PVP01_1410700			1		1
PVP01_1426100			1		1
PVP01_1434400			1		1
PVP01_1439700			1		1
PVP01_1465400		1			1
PVP01_0103300			1		1
PVP01_0109500			1		1
PVP01_0305200			1		1
PVP01_0307200			1		1
PVP01_0311700			1		1
PVP01_0319900			1		1
PVP01_0413100			1		1
PVP01_0413300			1		1
PVP01_0419700			1		1
PVP01_0421500			1		1
PVP01_0422600			1		1
PVP01_0518000			1		1
PVP01_0525500			1		1
PVP01_0605500			1		1
PVP01_0608200			1		1
PVP01_0705800			1		1
PVP01_0803400			1		1
PVP01_0806300			1		1
PVP01_0811800			1		1
PVP01_0816200			1		1
PVP01_0825700			1		1
PVP01_0827900			1		1
PVP01_0828000			1		1
PVP01_0836400			1		1
PVP01_0913200			1		1
PVP01_0913600			1		1
PVP01_0930400			1		1
PVP01_0933600			1		1
PVP01_0933800			1		1
PVP01_0934100			1		1
PVP01_0938400			1		1
PVP01_1007100			1		1
PVP01_1007800			1		1
PVP01_1019000			1		1
PVP01_1106800			1		1
PVP01_1107900			1		1
PVP01_1111900			1		1
PVP01_1112400			1		1
PVP01_1118300			1		1
PVP01_1121800			1		1
PVP01_1123800			1		1
PVP01_1125100			1		1
PVP01_1127100			1		1
PVP01_1132100			1		1
PVP01_1134300			1		1
PVP01_1138100			1		1
PVP01_1141500			1		1
PVP01_1143100			1		1
PVP01_1146100			1		1
PVP01_1204000			1		1
PVP01_1204900			1		1
PVP01_1205900			1		1
PVP01_1208100			1		1
PVP01_1211500			1		1
PVP01_1216200			1		1
PVP01_1220600			1		1
PVP01_1232000			1		1
PVP01_1233200			1		1
PVP01_1242800			1		1
PVP01_1244800			1		1
PVP01_1248200			1		1
PVP01_1252500			1		1
PVP01_1255500			1		1
PVP01_1257200			1		1
PVP01_1260800			1		1
PVP01_1263900			1		1
PVP01_1268500			1		1
PVP01_1304400			1		1
PVP01_1319700			1		1
PVP01_1323100			1		1
PVP01_1326600			1		1
PVP01_1331800			1		1
PVP01_1337100			1		1
PVP01_1339000			1		1
PVP01_1339100			1		1
PVP01_1344000			1		1
PVP01_1345600			1		1
PVP01_1405200			1		1
PVP01_1405900			1		1
PVP01_1417900			1		1
PVP01_1420400			1		1
PVP01_1420500			1		1
PVP01_1421000			1		1
PVP01_1430300			1		1
PVP01_1430800			1		1
PVP01_1431600			1		1
PVP01_1435300			1		1
PVP01_1438100			1		1
PVP01_1440400			1		1
PVP01_1459100			1		1
PVP01_1461700			1		1
PVP01_0105300		1			1
PVP01_0106200		1			1
PVP01_0106800		1			1
PVP01_0108300		1			1
PVP01_0111500		1			1
PVP01_0111800		1			1
PVP01_0117900		1			1
PVP01_0205000		1			1
PVP01_0213400		1			1
PVP01_0214000		1			1
PVP01_0307400		1			1
PVP01_0307800		1			1
PVP01_0406600		1			1
PVP01_0409700		1			1
PVP01_0409900		1			1
PVP01_0415300		1			1
PVP01_0416000		1			1
PVP01_0418900		1			1
PVP01_0421200		1			1
PVP01_0504400		1			1
PVP01_0507700		1			1
PVP01_0511400		1			1
PVP01_0514000		1			1
PVP01_0518300		1			1
PVP01_0528600		1			1
PVP01_0602800		1			1
PVP01_0618200		1			1
PVP01_0706900		1			1
PVP01_0711100		1			1
PVP01_0712100		1			1
PVP01_0715000		1			1
PVP01_0722100		1			1
PVP01_0722800		1			1
PVP01_0726650		1			1
PVP01_0802400		1			1
PVP01_0808500		1			1
PVP01_0809000		1			1
PVP01_0816500		1			1
PVP01_0817700		1			1
PVP01_0823700		1			1
PVP01_0905900		1			1
PVP01_0909400		1			1
PVP01_0918100		1			1
PVP01_0920000		1			1
PVP01_0922300		1			1
PVP01_0926200		1			1
PVP01_0927500		1			1
PVP01_0927800		1			1
PVP01_0929000		1			1
PVP01_0932300		1			1
PVP01_0932700		1			1
PVP01_0933500		1			1
PVP01_0934900		1			1
PVP01_0943400		1			1
PVP01_0945800		1			1
PVP01_1004800		1			1
PVP01_1005800		1			1
PVP01_1008500		1			1
PVP01_1009000		1			1
PVP01_1009900		1			1
PVP01_1012700		1			1
PVP01_1016800		1			1
PVP01_1019700		1			1
PVP01_1023800		1			1
PVP01_1026500		1			1
PVP01_1027100		1			1
PVP01_1031800		1			1
PVP01_1105800		1			1
PVP01_1116400		1			1
PVP01_1117600		1			1
PVP01_1122200		1			1
PVP01_1123300		1			1
PVP01_1131500		1			1
PVP01_1132400		1			1
PVP01_1135400		1			1
PVP01_1139500		1			1
PVP01_1144900		1			1
PVP01_1145700		1			1
PVP01_1209300		1			1
PVP01_1211700		1			1
PVP01_1212700		1			1
PVP01_1221200		1			1
PVP01_1228300		1			1
PVP01_1230600		1			1
PVP01_1231100		1			1
PVP01_1231300		1			1
PVP01_1233100		1			1
PVP01_1233800		1			1
PVP01_1237100		1			1
PVP01_1237700		1			1
PVP01_1244500		1			1
PVP01_1250700		1			1
PVP01_1253700		1			1
PVP01_1255000		1			1
PVP01_1256000		1			1
PVP01_1256200		1			1
PVP01_1258900		1			1
PVP01_1262100		1			1
PVP01_1266900		1			1
PVP01_1269800		1			1
PVP01_1301800		1			1
PVP01_1305600		1			1
PVP01_1310700		1			1
PVP01_1313500		1			1
PVP01_1314000		1			1
PVP01_1316300		1			1
PVP01_1317500		1			1
PVP01_1326000		1			1
PVP01_1326100		1			1
PVP01_1327800		1			1
PVP01_1331900		1			1
PVP01_1333300		1			1
PVP01_1336900		1			1
PVP01_1339300		1			1
PVP01_1344400		1			1
PVP01_1346600		1			1
PVP01_1406600		1			1
PVP01_1406900		1			1
PVP01_1410400		1			1
PVP01_1412900		1			1
PVP01_1423600		1			1
PVP01_1425800		1			1
PVP01_1434700		1			1
PVP01_1434800		1			1
PVP01_1447400		1			1
PVP01_1451300		1			1
PVP01_1457600		1			1
PVP01_1458000		1			1
PVP01_1458600		1			1
PVP01_1460500		1			1
PVP01_0004980	1				1
PVP01_0009620	1				1
PVP01_0009940	1				1
PVP01_0010960	1				1
PVP01_API04300	1				1

## Sheet: Streme_results_Gural_hypnozoite
motif_ID	motif_ALT_ID	seq_ID	site_Start	site_End	site_Strand	site_Score	site_Sequence
1-GGGGGGAG	STREME-1	transcript_PVP01_0617100.1	396	403	.	13.4	GGGGGGAG
1-GGGGGGAG	STREME-1	transcript_PVP01_0508300.1	1355	1362	.	13.4	GGGGGGAG
1-GGGGGGAG	STREME-1	transcript_PVP01_1449100.1	1501	1508	.	13.4	GGGGGGAG
1-GGGGGGAG	STREME-1	transcript_PVP01_0719200.1	3669	3676	.	13.4	GGGGGGAG
1-GGGGGGAG	STREME-1	transcript_PVP01_0713700.1	815	822	.	13.4	GGGGGGAG
1-GGGGGGAG	STREME-1	transcript_PVP01_1442800.1	1184	1191	.	13.4	GGGGGGAG
1-GGGGGGAG	STREME-1	transcript_PVP01_1442800.1	2445	2452	.	13.4	GGGGGGAG
1-GGGGGGAG	STREME-1	transcript_PVP01_1442800.1	3655	3662	.	13.4	GGGGGGAG
1-GGGGGGAG	STREME-1	transcript_PVP01_1220900.1	1791	1798	.	13.4	GGGGGGAG
1-GGGGGGAG	STREME-1	transcript_PVP01_1227400.1	616	623	.	13.4	GGGGGGAG
1-GGGGGGAG	STREME-1	transcript_PVP01_0811200.1	2027	2034	.	13.4	GGGGGGAG
1-GGGGGGAG	STREME-1	transcript_PVP01_1450100.1	225	232	.	13.4	GGGGGGAG
1-GGGGGGAG	STREME-1	transcript_PVP01_1450100.1	470	477	.	13.4	GGGGGGAG
1-GGGGGGAG	STREME-1	transcript_PVP01_1450100.1	1000	1007	.	13.4	GGGGGGAG
1-GGGGGGAG	STREME-1	transcript_PVP01_1450100.1	2459	2466	.	13.4	GGGGGGAG
1-GGGGGGAG	STREME-1	transcript_PVP01_1450100.1	2945	2952	.	13.4	GGGGGGAG
1-GGGGGGAG	STREME-1	transcript_PVP01_1450100.1	3107	3114	.	13.4	GGGGGGAG
1-GGGGGGAG	STREME-1	transcript_PVP01_0806100.1	1262	1269	.	13.4	GGGGGGAG
1-GGGGGGAG	STREME-1	transcript_PVP01_1420500.1	1990	1997	.	13.4	GGGGGGAG
1-GGGGGGAG	STREME-1	transcript_PVP01_0923500.1	794	801	.	13.4	GGGGGGAG
1-GGGGGGAG	STREME-1	transcript_PVP01_0923500.1	9234	9241	.	13.4	GGGGGGAG
1-GGGGGGAG	STREME-1	transcript_PVP01_0923500.1	10812	10819	.	13.4	GGGGGGAG
1-GGGGGGAG	STREME-1	transcript_PVP01_0923500.1	11865	11872	.	13.4	GGGGGGAG
1-GGGGGGAG	STREME-1	transcript_PVP01_0923500.1	11988	11995	.	13.4	GGGGGGAG
1-GGGGGGAG	STREME-1	transcript_PVP01_1115700.1	1116	1123	.	13.4	GGGGGGAG
1-GGGGGGAG	STREME-1	transcript_PVP01_1128300.1	7	14	.	13.4	GGGGGGAG
1-GGGGGGAG	STREME-1	transcript_PVP01_1128300.1	997	1004	.	13.4	GGGGGGAG
1-GGGGGGAG	STREME-1	transcript_PVP01_1120200.1	1531	1538	.	13.4	GGGGGGAG
1-GGGGGGAG	STREME-1	transcript_PVP01_0709300.1	1607	1614	.	13.4	GGGGGGAG
1-GGGGGGAG	STREME-1	transcript_PVP01_0318700.1	720	727	.	13.4	GGGGGGAG
1-GGGGGGAG	STREME-1	transcript_PVP01_0725800.1	3405	3412	.	13.4	GGGGGGAG
1-GGGGGGAG	STREME-1	transcript_PVP01_0725800.1	3607	3614	.	13.4	GGGGGGAG
1-GGGGGGAG	STREME-1	transcript_PVP01_0822100.1	926	933	.	13.4	GGGGGGAG
1-GGGGGGAG	STREME-1	transcript_PVP01_1133200.1	1576	1583	.	13.4	GGGGGGAG
1-GGGGGGAG	STREME-1	transcript_PVP01_1213000.1	1843	1850	.	13.4	GGGGGGAG
1-GGGGGGAG	STREME-1	transcript_PVP01_1455700.1	544	551	.	13.4	GGGGGGAG
1-GGGGGGAG	STREME-1	transcript_PVP01_1455700.1	665	672	.	13.4	GGGGGGAG
1-GGGGGGAG	STREME-1	transcript_PVP01_0834000.1	1523	1530	.	13.4	GGGGGGAG
1-GGGGGGAG	STREME-1	transcript_PVP01_1212600.1	1094	1101	.	13.4	GGGGGGAG
1-GGGGGGAG	STREME-1	transcript_PVP01_0306400.1	1246	1253	.	13.4	GGGGGGAG
1-GGGGGGAG	STREME-1	transcript_PVP01_1233500.1	3008	3015	.	13.4	GGGGGGAG
1-GGGGGGAG	STREME-1	transcript_PVP01_1233500.1	3271	3278	.	13.4	GGGGGGAG
1-GGGGGGAG	STREME-1	transcript_PVP01_0718800.1	1811	1818	.	13.4	GGGGGGAG
1-GGGGGGAG	STREME-1	transcript_PVP01_0718800.1	2606	2613	.	13.4	GGGGGGAG
1-GGGGGGAG	STREME-1	transcript_PVP01_0718800.1	3104	3111	.	13.4	GGGGGGAG
1-GGGGGGAG	STREME-1	transcript_PVP01_0718800.1	4674	4681	.	13.4	GGGGGGAG
1-GGGGGGAG	STREME-1	transcript_PVP01_1446300.1	1380	1387	.	13.4	GGGGGGAG
1-GGGGGGAG	STREME-1	transcript_PVP01_0612000.1	1309	1316	.	13.4	GGGGGGAG
1-GGGGGGAG	STREME-1	transcript_PVP01_1214300.1	851	858	.	13.4	GGGGGGAG
1-GGGGGGAG	STREME-1	transcript_PVP01_1002700.1	4811	4818	.	13.4	GGGGGGAG
1-GGGGGGAG	STREME-1	transcript_PVP01_1210800.1	2575	2582	.	13.4	GGGGGGAG
1-GGGGGGAG	STREME-1	transcript_PVP01_0711800.1	650	657	.	13.4	GGGGGGAG
1-GGGGGGAG	STREME-1	transcript_PVP01_0105400.1	3043	3050	.	13.4	GGGGGGAG
1-GGGGGGAG	STREME-1	transcript_PVP01_1342900.1	2689	2696	.	13.4	GGGGGGAG
1-GGGGGGAG	STREME-1	transcript_PVP01_1264800.1	2139	2146	.	13.4	GGGGGGAG
1-GGGGGGAG	STREME-1	transcript_PVP01_1264800.1	3835	3842	.	13.4	GGGGGGAG
1-GGGGGGAG	STREME-1	transcript_PVP01_1221600.1	422	429	.	13.4	GGGGGGAG
1-GGGGGGAG	STREME-1	transcript_PVP01_1241000.1	9168	9175	.	13.4	GGGGGGAG
1-GGGGGGAG	STREME-1	transcript_PVP01_1208600.1	2873	2880	.	13.4	GGGGGGAG
1-GGGGGGAG	STREME-1	transcript_PVP01_0810000.1	189	196	.	13.4	GGGGGGAG
1-GGGGGGAG	STREME-1	transcript_PVP01_1235800.1	2990	2997	.	13.4	GGGGGGAG
1-GGGGGGAG	STREME-1	transcript_PVP01_0939900.1	4773	4780	.	13.4	GGGGGGAG
1-GGGGGGAG	STREME-1	transcript_PVP01_1443200.1	2554	2561	.	13.4	GGGGGGAG
1-GGGGGGAG	STREME-1	transcript_PVP01_1262900.1	4654	4661	.	13.4	GGGGGGAG
1-GGGGGGAG	STREME-1	transcript_PVP01_1262900.1	6274	6281	.	13.4	GGGGGGAG
1-GGGGGGAG	STREME-1	transcript_PVP01_0409000.1	3285	3292	.	13.4	GGGGGGAG
1-GGGGGGAG	STREME-1	transcript_PVP01_0212900.1	2267	2274	.	13.4	GGGGGGAG
1-GGGGGGAG	STREME-1	transcript_PVP01_0836200.1	1689	1696	.	13.4	GGGGGGAG
1-GGGGGGAG	STREME-1	transcript_PVP01_0836200.1	1725	1732	.	13.4	GGGGGGAG
1-GGGGGGAG	STREME-1	transcript_PVP01_1216300.1	46	53	.	13.4	GGGGGGAG
1-GGGGGGAG	STREME-1	transcript_PVP01_1216300.1	681	688	.	13.4	GGGGGGAG
1-GGGGGGAG	STREME-1	transcript_PVP01_1216300.1	2411	2418	.	13.4	GGGGGGAG
1-GGGGGGAG	STREME-1	transcript_PVP01_1426600.1	463	470	.	13.4	GGGGGGAG
1-GGGGGGAG	STREME-1	transcript_PVP01_0703600.1	1612	1619	.	13.4	GGGGGGAG
1-GGGGGGAG	STREME-1	transcript_PVP01_0522600.1	450	457	.	13.4	GGGGGGAG
1-GGGGGGAG	STREME-1	transcript_PVP01_0522600.1	1546	1553	.	13.4	GGGGGGAG
1-GGGGGGAG	STREME-1	transcript_PVP01_1453900.1	2224	2231	.	13.4	GGGGGGAG
1-GGGGGGAG	STREME-1	transcript_PVP01_1453900.1	4045	4052	.	13.4	GGGGGGAG
1-GGGGGGAG	STREME-1	transcript_PVP01_1453900.1	4571	4578	.	13.4	GGGGGGAG
1-GGGGGGAG	STREME-1	transcript_PVP01_1121900.1	1200	1207	.	13.4	GGGGGGAG
1-GGGGGGAG	STREME-1	transcript_PVP01_0411300.1	1536	1543	.	13.4	GGGGGGAG
1-GGGGGGAG	STREME-1	transcript_PVP01_0411300.1	3463	3470	.	13.4	GGGGGGAG
1-GGGGGGAG	STREME-1	transcript_PVP01_1318200.1	1988	1995	.	13.4	GGGGGGAG
1-GGGGGGAG	STREME-1	transcript_PVP01_0211900.1	351	358	.	13.4	GGGGGGAG
1-GGGGGGAG	STREME-1	transcript_PVP01_1220500.1	2382	2389	.	13.4	GGGGGGAG
1-GGGGGGAG	STREME-1	transcript_PVP01_0912300.1	262	269	.	13.4	GGGGGGAG
1-GGGGGGAG	STREME-1	transcript_PVP01_1255100.1	3997	4004	.	13.4	GGGGGGAG
1-GGGGGGAG	STREME-1	transcript_PVP01_1407400.1	8515	8522	.	13.4	GGGGGGAG
1-GGGGGGAG	STREME-1	transcript_PVP01_1307300.1	8408	8415	.	13.4	GGGGGGAG
1-GGGGGGAG	STREME-1	transcript_PVP01_1301800.1	3203	3210	.	13.4	GGGGGGAG
1-GGGGGGAG	STREME-1	transcript_PVP01_1020200.1	3827	3834	.	13.4	GGGGGGAG
1-GGGGGGAG	STREME-1	transcript_PVP01_0810500.1	2473	2480	.	13.4	GGGGGGAG
1-GGGGGGAG	STREME-1	transcript_PVP01_0810500.1	3600	3607	.	13.4	GGGGGGAG
1-GGGGGGAG	STREME-1	transcript_PVP01_1108700.1	69	76	.	13.4	GGGGGGAG
1-GGGGGGAG	STREME-1	transcript_PVP01_0829200.1	376	383	.	13.4	GGGGGGAG
1-GGGGGGAG	STREME-1	transcript_PVP01_1414900.1	2281	2288	.	13.4	GGGGGGAG
1-GGGGGGAG	STREME-1	transcript_PVP01_1345000.1	1874	1881	.	13.4	GGGGGGAG
1-GGGGGGAG	STREME-1	transcript_PVP01_1345000.1	2803	2810	.	13.4	GGGGGGAG
1-GGGGGGAG	STREME-1	transcript_PVP01_1345000.1	4441	4448	.	13.4	GGGGGGAG
1-GGGGGGAG	STREME-1	transcript_PVP01_0828600.1	953	960	.	13.4	GGGGGGAG
1-GGGGGGAG	STREME-1	transcript_PVP01_0505200.1	496	503	.	13.4	GGGGGGAG
1-GGGGGGAG	STREME-1	transcript_PVP01_0505200.1	1551	1558	.	13.4	GGGGGGAG
1-GGGGGGAG	STREME-1	transcript_PVP01_0803500.1	4217	4224	.	13.4	GGGGGGAG
1-GGGGGGAG	STREME-1	transcript_PVP01_1118200.1	1604	1611	.	13.4	GGGGGGAG
1-GGGGGGAG	STREME-1	transcript_PVP01_1210400.1	1766	1773	.	13.4	GGGGGGAG
1-GGGGGGAG	STREME-1	transcript_PVP01_0604500.1	590	597	.	13.4	GGGGGGAG
1-GGGGGGAG	STREME-1	transcript_PVP01_0604500.1	956	963	.	13.4	GGGGGGAG
1-GGGGGGAG	STREME-1	transcript_PVP01_0604500.1	3586	3593	.	13.4	GGGGGGAG
1-GGGGGGAG	STREME-1	transcript_PVP01_0727800.1	104	111	.	13.4	GGGGGGAG
1-GGGGGGAG	STREME-1	transcript_PVP01_0727800.1	766	773	.	13.4	GGGGGGAG
1-GGGGGGAG	STREME-1	transcript_PVP01_0933300.1	2995	3002	.	13.4	GGGGGGAG
1-GGGGGGAG	STREME-1	transcript_PVP01_1269100.1	10229	10236	.	13.4	GGGGGGAG
1-GGGGGGAG	STREME-1	transcript_PVP01_1033300.1	5923	5930	.	13.4	GGGGGGAG
1-GGGGGGAG	STREME-1	transcript_PVP01_0505700.1	885	892	.	13.4	GGGGGGAG
1-GGGGGGAG	STREME-1	transcript_PVP01_0505700.1	1138	1145	.	13.4	GGGGGGAG
1-GGGGGGAG	STREME-1	transcript_PVP01_0505700.1	3797	3804	.	13.4	GGGGGGAG
1-GGGGGGAG	STREME-1	transcript_PVP01_0505700.1	4803	4810	.	13.4	GGGGGGAG
1-GGGGGGAG	STREME-1	transcript_PVP01_0935400.1	2904	2911	.	13.4	GGGGGGAG
1-GGGGGGAG	STREME-1	transcript_PVP01_1107500.1	2294	2301	.	13.4	GGGGGGAG
1-GGGGGGAG	STREME-1	transcript_PVP01_0614100.1	1960	1967	.	13.4	GGGGGGAG
1-GGGGGGAG	STREME-1	transcript_PVP01_0614100.1	3337	3344	.	13.4	GGGGGGAG
1-GGGGGGAG	STREME-1	transcript_PVP01_0732400.1	455	462	.	13.4	GGGGGGAG
1-GGGGGGAG	STREME-1	transcript_PVP01_0732400.1	724	731	.	13.4	GGGGGGAG
1-GGGGGGAG	STREME-1	transcript_PVP01_0936400.1	2255	2262	.	13.4	GGGGGGAG
1-GGGGGGAG	STREME-1	transcript_PVP01_1323100.1	3246	3253	.	13.4	GGGGGGAG
1-GGGGGGAG	STREME-1	transcript_PVP01_0817600.1	794	801	.	13.4	GGGGGGAG
1-GGGGGGAG	STREME-1	transcript_PVP01_0817600.1	1147	1154	.	13.4	GGGGGGAG
1-GGGGGGAG	STREME-1	transcript_PVP01_0817600.1	4907	4914	.	13.4	GGGGGGAG
1-GGGGGGAG	STREME-1	transcript_PVP01_1405700.1	1393	1400	.	13.4	GGGGGGAG
1-GGGGGGAG	STREME-1	transcript_PVP01_0834400.1	2927	2934	.	13.4	GGGGGGAG
1-GGGGGGAG	STREME-1	transcript_PVP01_0927500.1	4694	4701	.	13.4	GGGGGGAG
1-GGGGGGAG	STREME-1	transcript_PVP01_0819800.1	2583	2590	.	13.4	GGGGGGAG
1-GGGGGGAG	STREME-1	transcript_PVP01_0819800.1	7582	7589	.	13.4	GGGGGGAG
1-GGGGGGAG	STREME-1	transcript_PVP01_1254900.1	933	940	.	13.4	GGGGGGAG
1-GGGGGGAG	STREME-1	transcript_PVP01_1103200.1	1773	1780	.	13.4	GGGGGGAG
1-GGGGGGAG	STREME-1	transcript_PVP01_1015200.1	3112	3119	.	13.4	GGGGGGAG
1-GGGGGGAG	STREME-1	transcript_PVP01_1220800.1	1170	1177	.	13.4	GGGGGGAG
1-GGGGGGAG	STREME-1	transcript_PVP01_1220800.1	2862	2869	.	13.4	GGGGGGAG
1-GGGGGGAG	STREME-1	transcript_PVP01_1220800.1	4839	4846	.	13.4	GGGGGGAG
1-GGGGGGAG	STREME-1	transcript_PVP01_1341100.1	1896	1903	.	13.4	GGGGGGAG
1-GGGGGGAG	STREME-1	transcript_PVP01_1341100.1	2456	2463	.	13.4	GGGGGGAG
1-GGGGGGAG	STREME-1	transcript_PVP01_1463800.1	645	652	.	13.4	GGGGGGAG
1-GGGGGGAG	STREME-1	transcript_PVP01_1463800.1	1527	1534	.	13.4	GGGGGGAG
1-GGGGGGAG	STREME-1	transcript_PVP01_1411100.1	1007	1014	.	13.4	GGGGGGAG
1-GGGGGGAG	STREME-1	transcript_PVP01_1411800.1	1340	1347	.	13.4	GGGGGGAG
1-GGGGGGAG	STREME-1	transcript_PVP01_1411800.1	2774	2781	.	13.4	GGGGGGAG
1-GGGGGGAG	STREME-1	transcript_PVP01_1411800.1	3620	3627	.	13.4	GGGGGGAG
1-GGGGGGAG	STREME-1	transcript_PVP01_1323700.1	2522	2529	.	13.4	GGGGGGAG
1-GGGGGGAG	STREME-1	transcript_PVP01_1323700.1	2839	2846	.	13.4	GGGGGGAG
1-GGGGGGAG	STREME-1	transcript_PVP01_0713900.1	120	127	.	13.4	GGGGGGAG
1-GGGGGGAG	STREME-1	transcript_PVP01_0713900.1	910	917	.	13.4	GGGGGGAG
1-GGGGGGAG	STREME-1	transcript_PVP01_0705200.1	1638	1645	.	13.4	GGGGGGAG
1-GGGGGGAG	STREME-1	transcript_PVP01_0514900.1	1060	1067	.	13.4	GGGGGGAG
1-GGGGGGAG	STREME-1	transcript_PVP01_0507200.1	411	418	.	13.4	GGGGGGAG
1-GGGGGGAG	STREME-1	transcript_PVP01_0830300.1	1811	1818	.	13.4	GGGGGGAG
1-GGGGGGAG	STREME-1	transcript_PVP01_0830300.1	2242	2249	.	13.4	GGGGGGAG
1-GGGGGGAG	STREME-1	transcript_PVP01_0312500.1	330	337	.	13.4	GGGGGGAG
1-GGGGGGAG	STREME-1	transcript_PVP01_0312500.1	1707	1714	.	13.4	GGGGGGAG
1-GGGGGGAG	STREME-1	transcript_PVP01_0312500.1	2927	2934	.	13.4	GGGGGGAG
1-GGGGGGAG	STREME-1	transcript_PVP01_0832300.1	2016	2023	.	13.4	GGGGGGAG
1-GGGGGGAG	STREME-1	transcript_PVP01_0832300.1	2263	2270	.	13.4	GGGGGGAG
1-GGGGGGAG	STREME-1	transcript_PVP01_0832300.1	2296	2303	.	13.4	GGGGGGAG
1-GGGGGGAG	STREME-1	transcript_PVP01_0832300.1	3147	3154	.	13.4	GGGGGGAG
1-GGGGGGAG	STREME-1	transcript_PVP01_0832300.1	4549	4556	.	13.4	GGGGGGAG
1-GGGGGGAG	STREME-1	transcript_PVP01_0832300.1	6274	6281	.	13.4	GGGGGGAG
1-GGGGGGAG	STREME-1	transcript_PVP01_0832300.1	7239	7246	.	13.4	GGGGGGAG
1-GGGGGGAG	STREME-1	transcript_PVP01_0832300.1	9627	9634	.	13.4	GGGGGGAG
1-GGGGGGAG	STREME-1	transcript_PVP01_0115400.1	1702	1709	.	13.4	GGGGGGAG
1-GGGGGGAG	STREME-1	transcript_PVP01_0614700.1	292	299	.	13.4	GGGGGGAG
1-GGGGGGAG	STREME-1	transcript_PVP01_1024000.1	978	985	.	13.4	GGGGGGAG
1-GGGGGGAG	STREME-1	transcript_PVP01_1024000.1	1259	1266	.	13.4	GGGGGGAG
1-GGGGGGAG	STREME-1	transcript_PVP01_1024000.1	2083	2090	.	13.4	GGGGGGAG
1-GGGGGGAG	STREME-1	transcript_PVP01_1111400.1	2192	2199	.	13.4	GGGGGGAG
1-GGGGGGAG	STREME-1	transcript_PVP01_1111400.1	2207	2214	.	13.4	GGGGGGAG
1-GGGGGGAG	STREME-1	transcript_PVP01_1111400.1	3957	3964	.	13.4	GGGGGGAG
1-GGGGGGAG	STREME-1	transcript_PVP01_1111400.1	4449	4456	.	13.4	GGGGGGAG
1-GGGGGGAG	STREME-1	transcript_PVP01_1111400.1	4665	4672	.	13.4	GGGGGGAG
1-GGGGGGAG	STREME-1	transcript_PVP01_1123300.1	1273	1280	.	13.4	GGGGGGAG
1-GGGGGGAG	STREME-1	transcript_PVP01_0617700.1	675	682	.	13.4	GGGGGGAG
1-GGGGGGAG	STREME-1	transcript_PVP01_0820400.1	1269	1276	.	13.4	GGGGGGAG
1-GGGGGGAG	STREME-1	transcript_PVP01_0820400.1	1873	1880	.	13.4	GGGGGGAG
1-GGGGGGAG	STREME-1	transcript_PVP01_1212300.1	143	150	.	13.4	GGGGGGAG
1-GGGGGGAG	STREME-1	transcript_PVP01_1212300.1	1716	1723	.	13.4	GGGGGGAG
1-GGGGGGAG	STREME-1	transcript_PVP01_1236700.1	517	524	.	13.4	GGGGGGAG
1-GGGGGGAG	STREME-1	transcript_PVP01_1236700.1	1395	1402	.	13.4	GGGGGGAG
1-GGGGGGAG	STREME-1	transcript_PVP01_1236700.1	1548	1555	.	13.4	GGGGGGAG
1-GGGGGGAG	STREME-1	transcript_PVP01_1236700.1	4474	4481	.	13.4	GGGGGGAG
1-GGGGGGAG	STREME-1	transcript_PVP01_1126500.1	1591	1598	.	13.4	GGGGGGAG
1-GGGGGGAG	STREME-1	transcript_PVP01_1126500.1	2050	2057	.	13.4	GGGGGGAG
1-GGGGGGAG	STREME-1	transcript_PVP01_1126500.1	2067	2074	.	13.4	GGGGGGAG
1-GGGGGGAG	STREME-1	transcript_PVP01_1336400.1	1400	1407	.	13.4	GGGGGGAG
1-GGGGGGAG	STREME-1	transcript_PVP01_1336400.1	3373	3380	.	13.4	GGGGGGAG
1-GGGGGGAG	STREME-1	transcript_PVP01_1315800.1	1353	1360	.	13.4	GGGGGGAG
1-GGGGGGAG	STREME-1	transcript_PVP01_1315800.1	5628	5635	.	13.4	GGGGGGAG
1-GGGGGGAG	STREME-1	transcript_PVP01_0103500.1	1440	1447	.	13.4	GGGGGGAG
1-GGGGGGAG	STREME-1	transcript_PVP01_0515100.1	772	779	.	13.4	GGGGGGAG
1-GGGGGGAG	STREME-1	transcript_PVP01_0515100.1	973	980	.	13.4	GGGGGGAG
1-GGGGGGAG	STREME-1	transcript_PVP01_0113900.1	1620	1627	.	13.4	GGGGGGAG
1-GGGGGGAG	STREME-1	transcript_PVP01_0113900.1	2972	2979	.	13.4	GGGGGGAG
1-GGGGGGAG	STREME-1	transcript_PVP01_0517900.1	565	572	.	13.4	GGGGGGAG
1-GGGGGGAG	STREME-1	transcript_PVP01_1307800.1	800	807	.	13.4	GGGGGGAG
1-GGGGGGAG	STREME-1	transcript_PVP01_1238800.1	183	190	.	13.4	GGGGGGAG
1-GGGGGGAG	STREME-1	transcript_PVP01_1238800.1	6351	6358	.	13.4	GGGGGGAG
1-GGGGGGAG	STREME-1	transcript_PVP01_1109000.1	2647	2654	.	13.4	GGGGGGAG
1-GGGGGGAG	STREME-1	transcript_PVP01_1414100.1	803	810	.	13.4	GGGGGGAG
1-GGGGGGAG	STREME-1	transcript_PVP01_1112600.1	1384	1391	.	13.4	GGGGGGAG
1-GGGGGGAG	STREME-1	transcript_PVP01_0114500.1	314	321	.	13.4	GGGGGGAG
1-GGGGGGAG	STREME-1	transcript_PVP01_0114500.1	916	923	.	13.4	GGGGGGAG
1-GGGGGGAG	STREME-1	transcript_PVP01_0114500.1	1770	1777	.	13.4	GGGGGGAG
1-GGGGGGAG	STREME-1	transcript_PVP01_1342200.1	228	235	.	13.4	GGGGGGAG
1-GGGGGGAG	STREME-1	transcript_PVP01_1342200.1	1571	1578	.	13.4	GGGGGGAG
1-GGGGGGAG	STREME-1	transcript_PVP01_0414400.1	3201	3208	.	13.4	GGGGGGAG
1-GGGGGGAG	STREME-1	transcript_PVP01_0930100.1	235	242	.	13.4	GGGGGGAG
1-GGGGGGAG	STREME-1	transcript_PVP01_1464900.1	3279	3286	.	13.4	GGGGGGAG
1-GGGGGGAG	STREME-1	transcript_PVP01_1009800.1	388	395	.	13.4	GGGGGGAG
1-GGGGGGAG	STREME-1	transcript_PVP01_0921200.1	1132	1139	.	13.4	GGGGGGAG
1-GGGGGGAG	STREME-1	transcript_PVP01_0921200.1	3121	3128	.	13.4	GGGGGGAG
1-GGGGGGAG	STREME-1	transcript_PVP01_0320800.1	607	614	.	13.4	GGGGGGAG
1-GGGGGGAG	STREME-1	transcript_PVP01_0320800.1	2656	2663	.	13.4	GGGGGGAG
1-GGGGGGAG	STREME-1	transcript_PVP01_1109100.1	3139	3146	.	13.4	GGGGGGAG
1-GGGGGGAG	STREME-1	transcript_PVP01_1109100.1	4537	4544	.	13.4	GGGGGGAG
1-GGGGGGAG	STREME-1	transcript_PVP01_1444200.1	1220	1227	.	13.4	GGGGGGAG
1-GGGGGGAG	STREME-1	transcript_PVP01_0614800.1	744	751	.	13.4	GGGGGGAG
1-GGGGGGAG	STREME-1	transcript_PVP01_0930600.1	925	932	.	13.4	GGGGGGAG
1-GGGGGGAG	STREME-1	transcript_PVP01_1455200.1	1752	1759	.	13.4	GGGGGGAG
1-GGGGGGAG	STREME-1	transcript_PVP01_1455200.1	1916	1923	.	13.4	GGGGGGAG
1-GGGGGGAG	STREME-1	transcript_PVP01_1021100.1	849	856	.	13.4	GGGGGGAG
1-GGGGGGAG	STREME-1	transcript_PVP01_1021100.1	2234	2241	.	13.4	GGGGGGAG
1-GGGGGGAG	STREME-1	transcript_PVP01_1021100.1	2351	2358	.	13.4	GGGGGGAG
1-GGGGGGAG	STREME-1	transcript_PVP01_1021100.1	3518	3525	.	13.4	GGGGGGAG
1-GGGGGGAG	STREME-1	transcript_PVP01_1267800.1	581	588	.	13.4	GGGGGGAG
1-GGGGGGAG	STREME-1	transcript_PVP01_1428300.1	556	563	.	13.4	GGGGGGAG
1-GGGGGGAG	STREME-1	transcript_PVP01_1022100.1	838	845	.	13.4	GGGGGGAG
1-GGGGGGAG	STREME-1	transcript_PVP01_0313800.1	8648	8655	.	13.4	GGGGGGAG
1-GGGGGGAG	STREME-1	transcript_PVP01_1232200.1	283	290	.	13.4	GGGGGGAG
1-GGGGGGAG	STREME-1	transcript_PVP01_1232200.1	325	332	.	13.4	GGGGGGAG
1-GGGGGGAG	STREME-1	transcript_PVP01_1232200.1	418	425	.	13.4	GGGGGGAG
1-GGGGGGAG	STREME-1	transcript_PVP01_0716800.1	1733	1740	.	13.4	GGGGGGAG
1-GGGGGGAG	STREME-1	transcript_PVP01_0716800.1	1841	1848	.	13.4	GGGGGGAG
1-GGGGGGAG	STREME-1	transcript_PVP01_0716800.1	1872	1879	.	13.4	GGGGGGAG
1-GGGGGGAG	STREME-1	transcript_PVP01_0716800.1	1908	1915	.	13.4	GGGGGGAG
1-GGGGGGAG	STREME-1	transcript_PVP01_1237300.1	2876	2883	.	13.4	GGGGGGAG
1-GGGGGGAG	STREME-1	transcript_PVP01_0530200.1	2244	2251	.	13.4	GGGGGGAG
1-GGGGGGAG	STREME-1	transcript_PVP01_0530200.1	4790	4797	.	13.4	GGGGGGAG
1-GGGGGGAG	STREME-1	transcript_PVP01_1234900.1	1596	1603	.	13.4	GGGGGGAG
1-GGGGGGAG	STREME-1	transcript_PVP01_1234900.1	2694	2701	.	13.4	GGGGGGAG
1-GGGGGGAG	STREME-1	transcript_PVP01_0520400.1	1241	1248	.	13.4	GGGGGGAG
1-GGGGGGAG	STREME-1	transcript_PVP01_1424700.1	642	649	.	13.4	GGGGGGAG
1-GGGGGGAG	STREME-1	transcript_PVP01_0837600.1	4102	4109	.	13.4	GGGGGGAG
1-GGGGGGAG	STREME-1	transcript_PVP01_0837600.1	4857	4864	.	13.4	GGGGGGAG
1-GGGGGGAG	STREME-1	transcript_PVP01_1120600.1	965	972	.	13.4	GGGGGGAG
1-GGGGGGAG	STREME-1	transcript_PVP01_1120600.1	2178	2185	.	13.4	GGGGGGAG
1-GGGGGGAG	STREME-1	transcript_PVP01_0304200.1	287	294	.	13.4	GGGGGGAG
1-GGGGGGAG	STREME-1	transcript_PVP01_0304200.1	999	1006	.	13.4	GGGGGGAG
1-GGGGGGAG	STREME-1	transcript_PVP01_0728800.1	2257	2264	.	13.4	GGGGGGAG
1-GGGGGGAG	STREME-1	transcript_PVP01_0728800.1	3464	3471	.	13.4	GGGGGGAG
1-GGGGGGAG	STREME-1	transcript_PVP01_0728800.1	5047	5054	.	13.4	GGGGGGAG
1-GGGGGGAG	STREME-1	transcript_PVP01_0911800.1	189	196	.	13.4	GGGGGGAG
1-GGGGGGAG	STREME-1	transcript_PVP01_0922400.1	3050	3057	.	13.4	GGGGGGAG
1-GGGGGGAG	STREME-1	transcript_PVP01_1233200.1	691	698	.	13.4	GGGGGGAG
1-GGGGGGAG	STREME-1	transcript_PVP01_1233200.1	1507	1514	.	13.4	GGGGGGAG
1-GGGGGGAG	STREME-1	transcript_PVP01_1144500.1	949	956	.	13.4	GGGGGGAG
1-GGGGGGAG	STREME-1	transcript_PVP01_1144500.1	1094	1101	.	13.4	GGGGGGAG
1-GGGGGGAG	STREME-1	transcript_PVP01_1303400.1	799	806	.	13.4	GGGGGGAG
1-GGGGGGAG	STREME-1	transcript_PVP01_1330900.1	430	437	.	13.4	GGGGGGAG
1-GGGGGGAG	STREME-1	transcript_PVP01_0725100.1	914	921	.	13.4	GGGGGGAG
1-GGGGGGAG	STREME-1	transcript_PVP01_0725700.1	4512	4519	.	13.4	GGGGGGAG
1-GGGGGGAG	STREME-1	transcript_PVP01_1449900.1	152	159	.	13.4	GGGGGGAG
1-GGGGGGAG	STREME-1	transcript_PVP01_0207300.1	532	539	.	13.4	GGGGGGAG
1-GGGGGGAG	STREME-1	transcript_PVP01_0207300.1	1259	1266	.	13.4	GGGGGGAG
1-GGGGGGAG	STREME-1	transcript_PVP01_0207300.1	1685	1692	.	13.4	GGGGGGAG
1-GGGGGGAG	STREME-1	transcript_PVP01_0207300.1	3803	3810	.	13.4	GGGGGGAG
1-GGGGGGAG	STREME-1	transcript_PVP01_0207300.1	3844	3851	.	13.4	GGGGGGAG
1-GGGGGGAG	STREME-1	transcript_PVP01_0207300.1	6354	6361	.	13.4	GGGGGGAG
1-GGGGGGAG	STREME-1	transcript_PVP01_0207300.1	9915	9922	.	13.4	GGGGGGAG
1-GGGGGGAG	STREME-1	transcript_PVP01_0908700.1	1853	1860	.	13.4	GGGGGGAG
1-GGGGGGAG	STREME-1	transcript_PVP01_0208100.1	1766	1773	.	13.4	GGGGGGAG
1-GGGGGGAG	STREME-1	transcript_PVP01_0208100.1	4204	4211	.	13.4	GGGGGGAG
1-GGGGGGAG	STREME-1	transcript_PVP01_1457200.1	3268	3275	.	13.4	GGGGGGAG
1-GGGGGGAG	STREME-1	transcript_PVP01_1262600.1	1433	1440	.	13.4	GGGGGGAG
1-GGGGGGAG	STREME-1	transcript_PVP01_0611400.1	1339	1346	.	13.4	GGGGGGAG
1-GGGGGGAG	STREME-1	transcript_PVP01_0611400.1	1378	1385	.	13.4	GGGGGGAG
1-GGGGGGAG	STREME-1	transcript_PVP01_1215200.1	1143	1150	.	13.4	GGGGGGAG
1-GGGGGGAG	STREME-1	transcript_PVP01_1215200.1	2070	2077	.	13.4	GGGGGGAG
1-GGGGGGAG	STREME-1	transcript_PVP01_0947400.1	6990	6997	.	13.4	GGGGGGAG
1-GGGGGGAG	STREME-1	transcript_PVP01_1131600.1	1276	1283	.	13.4	GGGGGGAG
1-GGGGGGAG	STREME-1	transcript_PVP01_1131600.1	1903	1910	.	13.4	GGGGGGAG
1-GGGGGGAG	STREME-1	transcript_PVP01_1410600.1	390	397	.	13.4	GGGGGGAG
1-GGGGGGAG	STREME-1	transcript_PVP01_1462300.1	63	70	.	13.4	GGGGGGAG
1-GGGGGGAG	STREME-1	transcript_PVP01_0728700.1	279	286	.	13.4	GGGGGGAG
1-GGGGGGAG	STREME-1	transcript_PVP01_0728700.1	2693	2700	.	13.4	GGGGGGAG
1-GGGGGGAG	STREME-1	transcript_PVP01_0204700.1	1274	1281	.	13.4	GGGGGGAG
1-GGGGGGAG	STREME-1	transcript_PVP01_0204700.1	2349	2356	.	13.4	GGGGGGAG
1-GGGGGGAG	STREME-1	transcript_PVP01_1467700.1	1710	1717	.	13.4	GGGGGGAG
1-GGGGGGAG	STREME-1	transcript_PVP01_1467700.1	1849	1856	.	13.4	GGGGGGAG
1-GGGGGGAG	STREME-1	transcript_PVP01_1467700.1	3120	3127	.	13.4	GGGGGGAG
1-GGGGGGAG	STREME-1	transcript_PVP01_0832600.1	1482	1489	.	13.4	GGGGGGAG
1-GGGGGGAG	STREME-1	transcript_PVP01_1023700.1	2047	2054	.	13.4	GGGGGGAG
1-GGGGGGAG	STREME-1	transcript_PVP01_1428800.1	946	953	.	13.4	GGGGGGAG
1-GGGGGGAG	STREME-1	transcript_PVP01_0927000.1	301	308	.	13.4	GGGGGGAG
1-GGGGGGAG	STREME-1	transcript_PVP01_1408200.1	2540	2547	.	13.4	GGGGGGAG
1-GGGGGGAG	STREME-1	transcript_PVP01_0705800.1	970	977	.	13.4	GGGGGGAG
1-GGGGGGAG	STREME-1	transcript_PVP01_0732500.1	1600	1607	.	13.4	GGGGGGAG
1-GGGGGGAG	STREME-1	transcript_PVP01_1465500.1	713	720	.	13.4	GGGGGGAG
1-GGGGGGAG	STREME-1	transcript_PVP01_0518400.1	341	348	.	13.4	GGGGGGAG
1-GGGGGGAG	STREME-1	transcript_PVP01_0518400.1	1497	1504	.	13.4	GGGGGGAG
1-GGGGGGAG	STREME-1	transcript_PVP01_1326600.1	581	588	.	13.4	GGGGGGAG
1-GGGGGGAG	STREME-1	transcript_PVP01_1326600.1	2710	2717	.	13.4	GGGGGGAG
1-GGGGGGAG	STREME-1	transcript_PVP01_0807500.1	516	523	.	13.4	GGGGGGAG
1-GGGGGGAG	STREME-1	transcript_PVP01_1229400.1	297	304	.	13.4	GGGGGGAG
1-GGGGGGAG	STREME-1	transcript_PVP01_0822200.1	723	730	.	13.4	GGGGGGAG
1-GGGGGGAG	STREME-1	transcript_PVP01_0321000.1	2022	2029	.	13.4	GGGGGGAG
1-GGGGGGAG	STREME-1	transcript_PVP01_1132100.1	1820	1827	.	10.23	GGGGGUAG
1-GGGGGGAG	STREME-1	transcript_PVP01_0702200.1	4525	4532	.	10.23	GGGGGUAG
1-GGGGGGAG	STREME-1	transcript_PVP01_0713700.1	903	910	.	10.23	GGGGGUAG
1-GGGGGGAG	STREME-1	transcript_PVP01_1420500.1	1628	1635	.	10.23	GGGGGUAG
1-GGGGGGAG	STREME-1	transcript_PVP01_1133200.1	1837	1844	.	10.23	GGGGGUAG
1-GGGGGGAG	STREME-1	transcript_PVP01_1415600.1	889	896	.	10.23	GGGGGUAG
1-GGGGGGAG	STREME-1	transcript_PVP01_1020900.1	143	150	.	10.23	GGGGGUAG
1-GGGGGGAG	STREME-1	transcript_PVP01_1437700.1	3213	3220	.	10.23	GGGGGUAG
1-GGGGGGAG	STREME-1	transcript_PVP01_0835900.1	688	695	.	10.23	GGGGGUAG
1-GGGGGGAG	STREME-1	transcript_PVP01_1262900.1	7540	7547	.	10.23	GGGGGUAG
1-GGGGGGAG	STREME-1	transcript_PVP01_0409000.1	3268	3275	.	10.23	GGGGGUAG
1-GGGGGGAG	STREME-1	transcript_PVP01_0409000.1	4787	4794	.	10.23	GGGGGUAG
1-GGGGGGAG	STREME-1	transcript_PVP01_1426600.1	4688	4695	.	10.23	GGGGGUAG
1-GGGGGGAG	STREME-1	transcript_PVP01_1340800.1	1227	1234	.	10.23	GGGGGUAG
1-GGGGGGAG	STREME-1	transcript_PVP01_0411300.1	697	704	.	10.23	GGGGGUAG
1-GGGGGGAG	STREME-1	transcript_PVP01_0805400.1	2927	2934	.	10.23	GGGGGUAG
1-GGGGGGAG	STREME-1	transcript_PVP01_1255100.1	2898	2905	.	10.23	GGGGGUAG
1-GGGGGGAG	STREME-1	transcript_PVP01_1419900.1	2172	2179	.	10.23	GGGGGUAG
1-GGGGGGAG	STREME-1	transcript_PVP01_1209600.1	253	260	.	10.23	GGGGGUAG
1-GGGGGGAG	STREME-1	transcript_PVP01_1247900.1	3766	3773	.	10.23	GGGGGUAG
1-GGGGGGAG	STREME-1	transcript_PVP01_1307300.1	3742	3749	.	10.23	GGGGGUAG
1-GGGGGGAG	STREME-1	transcript_PVP01_1307300.1	6456	6463	.	10.23	GGGGGUAG
1-GGGGGGAG	STREME-1	transcript_PVP01_1301800.1	4824	4831	.	10.23	GGGGGUAG
1-GGGGGGAG	STREME-1	transcript_PVP01_0204200.1	162	169	.	10.23	GGGGGUAG
1-GGGGGGAG	STREME-1	transcript_PVP01_1345000.1	294	301	.	10.23	GGGGGUAG
1-GGGGGGAG	STREME-1	transcript_PVP01_1011000.1	5942	5949	.	10.23	GGGGGUAG
1-GGGGGGAG	STREME-1	transcript_PVP01_1011000.1	8932	8939	.	10.23	GGGGGUAG
1-GGGGGGAG	STREME-1	transcript_PVP01_0727800.1	1366	1373	.	10.23	GGGGGUAG
1-GGGGGGAG	STREME-1	transcript_PVP01_1269100.1	10090	10097	.	10.23	GGGGGUAG
1-GGGGGGAG	STREME-1	transcript_PVP01_0922300.1	3149	3156	.	10.23	GGGGGUAG
1-GGGGGGAG	STREME-1	transcript_PVP01_1457700.1	1143	1150	.	10.23	GGGGGUAG
1-GGGGGGAG	STREME-1	transcript_PVP01_0927500.1	1263	1270	.	10.23	GGGGGUAG
1-GGGGGGAG	STREME-1	transcript_PVP01_0927500.1	2989	2996	.	10.23	GGGGGUAG
1-GGGGGGAG	STREME-1	transcript_PVP01_0707600.1	3339	3346	.	10.23	GGGGGUAG
1-GGGGGGAG	STREME-1	transcript_PVP01_1126100.1	721	728	.	10.23	GGGGGUAG
1-GGGGGGAG	STREME-1	transcript_PVP01_0507200.1	903	910	.	10.23	GGGGGUAG
1-GGGGGGAG	STREME-1	transcript_PVP01_1304200.1	967	974	.	10.23	GGGGGUAG
1-GGGGGGAG	STREME-1	transcript_PVP01_0832300.1	8197	8204	.	10.23	GGGGGUAG
1-GGGGGGAG	STREME-1	transcript_PVP01_0212600.1	2594	2601	.	10.23	GGGGGUAG
1-GGGGGGAG	STREME-1	transcript_PVP01_1111400.1	8065	8072	.	10.23	GGGGGUAG
1-GGGGGGAG	STREME-1	transcript_PVP01_0820400.1	2009	2016	.	10.23	GGGGGUAG
1-GGGGGGAG	STREME-1	transcript_PVP01_1236700.1	2504	2511	.	10.23	GGGGGUAG
1-GGGGGGAG	STREME-1	transcript_PVP01_1236700.1	2525	2532	.	10.23	GGGGGUAG
1-GGGGGGAG	STREME-1	transcript_PVP01_1236700.1	2546	2553	.	10.23	GGGGGUAG
1-GGGGGGAG	STREME-1	transcript_PVP01_1236700.1	2567	2574	.	10.23	GGGGGUAG
1-GGGGGGAG	STREME-1	transcript_PVP01_1236700.1	2588	2595	.	10.23	GGGGGUAG
1-GGGGGGAG	STREME-1	transcript_PVP01_0312400.1	1446	1453	.	10.23	GGGGGUAG
1-GGGGGGAG	STREME-1	transcript_PVP01_1237400.1	1728	1735	.	10.23	GGGGGUAG
1-GGGGGGAG	STREME-1	transcript_PVP01_1267100.1	513	520	.	10.23	GGGGGUAG
1-GGGGGGAG	STREME-1	transcript_PVP01_0708400.1	1000	1007	.	10.23	GGGGGUAG
1-GGGGGGAG	STREME-1	transcript_PVP01_0936700.1	765	772	.	10.23	GGGGGUAG
1-GGGGGGAG	STREME-1	transcript_PVP01_1140700.1	2682	2689	.	10.23	GGGGGUAG
1-GGGGGGAG	STREME-1	transcript_PVP01_1315800.1	1638	1645	.	10.23	GGGGGUAG
1-GGGGGGAG	STREME-1	transcript_PVP01_0103600.1	4535	4542	.	10.23	GGGGGUAG
1-GGGGGGAG	STREME-1	transcript_PVP01_0517000.1	1402	1409	.	10.23	GGGGGUAG
1-GGGGGGAG	STREME-1	transcript_PVP01_0517000.1	3598	3605	.	10.23	GGGGGUAG
1-GGGGGGAG	STREME-1	transcript_PVP01_1256400.1	842	849	.	10.23	GGGGGUAG
1-GGGGGGAG	STREME-1	transcript_PVP01_1009800.1	2702	2709	.	10.23	GGGGGUAG
1-GGGGGGAG	STREME-1	transcript_PVP01_1265300.1	552	559	.	10.23	GGGGGUAG
1-GGGGGGAG	STREME-1	transcript_PVP01_1109100.1	4557	4564	.	10.23	GGGGGUAG
1-GGGGGGAG	STREME-1	transcript_PVP01_1264400.1	2237	2244	.	10.23	GGGGGUAG
1-GGGGGGAG	STREME-1	transcript_PVP01_1332600.1	2106	2113	.	10.23	GGGGGUAG
1-GGGGGGAG	STREME-1	transcript_PVP01_0215100.1	3027	3034	.	10.23	GGGGGUAG
1-GGGGGGAG	STREME-1	transcript_PVP01_0530200.1	3963	3970	.	10.23	GGGGGUAG
1-GGGGGGAG	STREME-1	transcript_PVP01_0409700.1	2879	2886	.	10.23	GGGGGUAG
1-GGGGGGAG	STREME-1	transcript_PVP01_1144500.1	1221	1228	.	10.23	GGGGGUAG
1-GGGGGGAG	STREME-1	transcript_PVP01_1303400.1	1252	1259	.	10.23	GGGGGUAG
1-GGGGGGAG	STREME-1	transcript_PVP01_0725100.1	1053	1060	.	10.23	GGGGGUAG
1-GGGGGGAG	STREME-1	transcript_PVP01_0725700.1	737	744	.	10.23	GGGGGUAG
1-GGGGGGAG	STREME-1	transcript_PVP01_0207300.1	6065	6072	.	10.23	GGGGGUAG
1-GGGGGGAG	STREME-1	transcript_PVP01_1445100.1	3768	3775	.	10.23	GGGGGUAG
1-GGGGGGAG	STREME-1	transcript_PVP01_1433000.1	3949	3956	.	10.23	GGGGGUAG
1-GGGGGGAG	STREME-1	transcript_PVP01_1020500.1	1150	1157	.	10.23	GGGGGUAG
1-GGGGGGAG	STREME-1	transcript_PVP01_0529500.1	1447	1454	.	10.23	GGGGGUAG
1-GGGGGGAG	STREME-1	transcript_PVP01_1213300.1	1517	1524	.	10.23	GGGGGUAG
1-GGGGGGAG	STREME-1	transcript_PVP01_0421400.1	337	344	.	10.23	GGGGGUAG
1-GGGGGGAG	STREME-1	transcript_PVP01_1341700.1	2164	2171	.	10.23	GGGGGUAG
1-GGGGGGAG	STREME-1	transcript_PVP01_0306900.1	1456	1463	.	10.23	GGGGGUAG
1-GGGGGGAG	STREME-1	transcript_PVP01_0306900.1	2688	2695	.	10.23	GGGGGUAG
1-GGGGGGAG	STREME-1	transcript_PVP01_0215600.1	13301	13308	.	10.23	GGGGGUAG
1-GGGGGGAG	STREME-1	transcript_PVP01_1212400.1	1405	1412	.	10.23	GGGGGUAG
1-GGGGGGAG	STREME-1	transcript_PVP01_0108500.1	1711	1718	.	10.23	GGGGGUAG
1-GGGGGGAG	STREME-1	transcript_PVP01_0927100.1	2059	2066	.	10.23	GGGGGUAG
1-GGGGGGAG	STREME-1	transcript_PVP01_0411700.1	391	398	.	9.45	GGGCGGAG
1-GGGGGGAG	STREME-1	transcript_PVP01_1227400.1	365	372	.	9.45	GGGCGGAG
1-GGGGGGAG	STREME-1	transcript_PVP01_1227400.1	1151	1158	.	9.45	GGGCGGAG
1-GGGGGGAG	STREME-1	transcript_PVP01_1122800.1	809	816	.	9.45	GGGCGGAG
1-GGGGGGAG	STREME-1	transcript_PVP01_1415200.1	861	868	.	9.45	GGCGGGAG
1-GGGGGGAG	STREME-1	transcript_PVP01_0940100.1	2104	2111	.	9.45	GGGCGGAG
1-GGGGGGAG	STREME-1	transcript_PVP01_1115700.1	1172	1179	.	9.45	GGCGGGAG
1-GGGGGGAG	STREME-1	transcript_PVP01_1120700.1	815	822	.	9.45	GGGCGGAG
1-GGGGGGAG	STREME-1	transcript_PVP01_0617300.1	306	313	.	9.45	GGCGGGAG
1-GGGGGGAG	STREME-1	transcript_PVP01_0725800.1	1850	1857	.	9.45	GGCGGGAG
1-GGGGGGAG	STREME-1	transcript_PVP01_0725800.1	2455	2462	.	9.45	GGGCGGAG
1-GGGGGGAG	STREME-1	transcript_PVP01_1210800.1	2732	2739	.	9.45	GGCGGGAG
1-GGGGGGAG	STREME-1	transcript_PVP01_0106800.1	686	693	.	9.45	GGGCGGAG
1-GGGGGGAG	STREME-1	transcript_PVP01_1306000.1	1378	1385	.	9.45	GGCGGGAG
1-GGGGGGAG	STREME-1	transcript_PVP01_1239600.1	2152	2159	.	9.45	GGCGGGAG
1-GGGGGGAG	STREME-1	transcript_PVP01_1262900.1	4848	4855	.	9.45	GGGCGGAG
1-GGGGGGAG	STREME-1	transcript_PVP01_0726600.1	1267	1274	.	9.45	GGGCGGAG
1-GGGGGGAG	STREME-1	transcript_PVP01_1340800.1	459	466	.	9.45	GGGCGGAG
1-GGGGGGAG	STREME-1	transcript_PVP01_1340800.1	860	867	.	9.45	GGCGGGAG
1-GGGGGGAG	STREME-1	transcript_PVP01_1318200.1	1236	1243	.	9.45	GGCGGGAG
1-GGGGGGAG	STREME-1	transcript_PVP01_0211900.1	1142	1149	.	9.45	GGGCGGAG
1-GGGGGGAG	STREME-1	transcript_PVP01_0514500.1	292	299	.	9.45	GGCGGGAG
1-GGGGGGAG	STREME-1	transcript_PVP01_0706400.1	1922	1929	.	9.45	GGCGGGAG
1-GGGGGGAG	STREME-1	transcript_PVP01_1419900.1	1776	1783	.	9.45	GGGCGGAG
1-GGGGGGAG	STREME-1	transcript_PVP01_1419900.1	2136	2143	.	9.45	GGCGGGAG
1-GGGGGGAG	STREME-1	transcript_PVP01_1253100.1	1945	1952	.	9.45	GGCGGGAG
1-GGGGGGAG	STREME-1	transcript_PVP01_1020200.1	1440	1447	.	9.45	GGGCGGAG
1-GGGGGGAG	STREME-1	transcript_PVP01_0803500.1	2282	2289	.	9.45	GGGCGGAG
1-GGGGGGAG	STREME-1	transcript_PVP01_0727000.1	68	75	.	9.45	GGGCGGAG
1-GGGGGGAG	STREME-1	transcript_PVP01_0604500.1	2025	2032	.	9.45	GGCGGGAG
1-GGGGGGAG	STREME-1	transcript_PVP01_0604500.1	3122	3129	.	9.45	GGCGGGAG
1-GGGGGGAG	STREME-1	transcript_PVP01_0505700.1	4389	4396	.	9.45	GGGCGGAG
1-GGGGGGAG	STREME-1	transcript_PVP01_0512700.1	1802	1809	.	9.45	GGGCGGAG
1-GGGGGGAG	STREME-1	transcript_PVP01_0817600.1	5841	5848	.	9.45	GGCGGGAG
1-GGGGGGAG	STREME-1	transcript_PVP01_0918100.1	822	829	.	9.45	GGCGGGAG
1-GGGGGGAG	STREME-1	transcript_PVP01_0819800.1	2871	2878	.	9.45	GGCGGGAG
1-GGGGGGAG	STREME-1	transcript_PVP01_0707600.1	2963	2970	.	9.45	GGGCGGAG
1-GGGGGGAG	STREME-1	transcript_PVP01_1323700.1	1303	1310	.	9.45	GGGCGGAG
1-GGGGGGAG	STREME-1	transcript_PVP01_0601900.1	353	360	.	9.45	GGGCGGAG
1-GGGGGGAG	STREME-1	transcript_PVP01_1344000.1	2435	2442	.	9.45	GGCGGGAG
1-GGGGGGAG	STREME-1	transcript_PVP01_0830300.1	2942	2949	.	9.45	GGGCGGAG
1-GGGGGGAG	STREME-1	transcript_PVP01_0832300.1	2574	2581	.	9.45	GGGCGGAG
1-GGGGGGAG	STREME-1	transcript_PVP01_0832300.1	6310	6317	.	9.45	GGCGGGAG
1-GGGGGGAG	STREME-1	transcript_PVP01_0616100.1	1530	1537	.	9.45	GGCGGGAG
1-GGGGGGAG	STREME-1	transcript_PVP01_0937500.1	2944	2951	.	9.45	GGCGGGAG
1-GGGGGGAG	STREME-1	transcript_PVP01_0937500.1	5615	5622	.	9.45	GGGCGGAG
1-GGGGGGAG	STREME-1	transcript_PVP01_0937500.1	5709	5716	.	9.45	GGCGGGAG
1-GGGGGGAG	STREME-1	transcript_PVP01_1236700.1	3881	3888	.	9.45	GGGCGGAG
1-GGGGGGAG	STREME-1	transcript_PVP01_1315800.1	528	535	.	9.45	GGCGGGAG
1-GGGGGGAG	STREME-1	transcript_PVP01_0517000.1	2722	2729	.	9.45	GGGCGGAG
1-GGGGGGAG	STREME-1	transcript_PVP01_0114500.1	1485	1492	.	9.45	GGCGGGAG
1-GGGGGGAG	STREME-1	transcript_PVP01_1247800.1	2307	2314	.	9.45	GGGCGGAG
1-GGGGGGAG	STREME-1	transcript_PVP01_0921200.1	7741	7748	.	9.45	GGGCGGAG
1-GGGGGGAG	STREME-1	transcript_PVP01_0614800.1	1943	1950	.	9.45	GGGCGGAG
1-GGGGGGAG	STREME-1	transcript_PVP01_0614800.1	1982	1989	.	9.45	GGGCGGAG
1-GGGGGGAG	STREME-1	transcript_PVP01_0614800.1	2474	2481	.	9.45	GGGCGGAG
1-GGGGGGAG	STREME-1	transcript_PVP01_1021100.1	4727	4734	.	9.45	GGGCGGAG
1-GGGGGGAG	STREME-1	transcript_PVP01_0614200.1	1699	1706	.	9.45	GGCGGGAG
1-GGGGGGAG	STREME-1	transcript_PVP01_0722700.1	70	77	.	9.45	GGCGGGAG
1-GGGGGGAG	STREME-1	transcript_PVP01_0409700.1	3153	3160	.	9.45	GGCGGGAG
1-GGGGGGAG	STREME-1	transcript_PVP01_0304200.1	598	605	.	9.45	GGCGGGAG
1-GGGGGGAG	STREME-1	transcript_PVP01_1012000.1	2365	2372	.	9.45	GGCGGGAG
1-GGGGGGAG	STREME-1	transcript_PVP01_1233200.1	562	569	.	9.45	GGCGGGAG
1-GGGGGGAG	STREME-1	transcript_PVP01_1303400.1	665	672	.	9.45	GGGCGGAG
1-GGGGGGAG	STREME-1	transcript_PVP01_0725700.1	1726	1733	.	9.45	GGGCGGAG
1-GGGGGGAG	STREME-1	transcript_PVP01_0725700.1	2587	2594	.	9.45	GGGCGGAG
1-GGGGGGAG	STREME-1	transcript_PVP01_0207300.1	1022	1029	.	9.45	GGCGGGAG
1-GGGGGGAG	STREME-1	transcript_PVP01_0207300.1	1802	1809	.	9.45	GGGCGGAG
1-GGGGGGAG	STREME-1	transcript_PVP01_0207300.1	8532	8539	.	9.45	GGCGGGAG
1-GGGGGGAG	STREME-1	transcript_PVP01_1410600.1	1277	1284	.	9.45	GGCGGGAG
1-GGGGGGAG	STREME-1	transcript_PVP01_1210200.1	67	74	.	9.45	GGGCGGAG
1-GGGGGGAG	STREME-1	transcript_PVP01_0832600.1	2007	2014	.	9.45	GGGCGGAG
1-GGGGGGAG	STREME-1	transcript_PVP01_1326600.1	1851	1858	.	9.45	GGGCGGAG
1-GGGGGGAG	STREME-1	transcript_PVP01_1326600.1	2782	2789	.	9.45	GGCGGGAG
1-GGGGGGAG	STREME-1	transcript_PVP01_1326600.1	4495	4502	.	9.45	GGCGGGAG
1-GGGGGGAG	STREME-1	transcript_PVP01_1326600.1	4513	4520	.	9.45	GGCGGGAG
1-GGGGGGAG	STREME-1	transcript_PVP01_0822200.1	747	754	.	9.45	GGCGGGAG
1-GGGGGGAG	STREME-1	transcript_PVP01_0321000.1	1008	1015	.	9.45	GGCGGGAG
1-GGGGGGAG	STREME-1	transcript_PVP01_0617100.1	1009	1016	.	9.35	GGGUGGAG
1-GGGGGGAG	STREME-1	transcript_PVP01_0609600.1	1476	1483	.	9.35	GGGUGGAG
1-GGGGGGAG	STREME-1	transcript_PVP01_1011100.1	1663	1670	.	9.35	GGGUGGAG
1-GGGGGGAG	STREME-1	transcript_PVP01_1030900.1	1345	1352	.	9.35	GGUGGGAG
1-GGGGGGAG	STREME-1	transcript_PVP01_0512300.1	1629	1636	.	9.35	GGGUGGAG
1-GGGGGGAG	STREME-1	transcript_PVP01_0923500.1	2812	2819	.	9.35	GGUGGGAG
1-GGGGGGAG	STREME-1	transcript_PVP01_1461600.1	1495	1502	.	9.35	GGUGGGAG
1-GGGGGGAG	STREME-1	transcript_PVP01_0834000.1	1598	1605	.	9.35	GGGUGGAG
1-GGGGGGAG	STREME-1	transcript_PVP01_0718800.1	3383	3390	.	9.35	GGUGGGAG
1-GGGGGGAG	STREME-1	transcript_PVP01_1007200.1	4549	4556	.	9.35	GGGUGGAG
1-GGGGGGAG	STREME-1	transcript_PVP01_1429200.1	123	130	.	9.35	GGGUGGAG
1-GGGGGGAG	STREME-1	transcript_PVP01_0509900.1	1346	1353	.	9.35	GGUGGGAG
1-GGGGGGAG	STREME-1	transcript_PVP01_1241000.1	9233	9240	.	9.35	GGGUGGAG
1-GGGGGGAG	STREME-1	transcript_PVP01_1235800.1	3016	3023	.	9.35	GGGUGGAG
1-GGGGGGAG	STREME-1	transcript_PVP01_0815700.1	1851	1858	.	9.35	GGGUGGAG
1-GGGGGGAG	STREME-1	transcript_PVP01_0409000.1	1350	1357	.	9.35	GGGUGGAG
1-GGGGGGAG	STREME-1	transcript_PVP01_1425300.1	261	268	.	9.35	GGGUGGAG
1-GGGGGGAG	STREME-1	transcript_PVP01_0726600.1	428	435	.	9.35	GGGUGGAG
1-GGGGGGAG	STREME-1	transcript_PVP01_0205800.1	1898	1905	.	9.35	GGGUGGAG
1-GGGGGGAG	STREME-1	transcript_PVP01_0205800.1	1971	1978	.	9.35	GGGUGGAG
1-GGGGGGAG	STREME-1	transcript_PVP01_0703600.1	3097	3104	.	9.35	GGUGGGAG
1-GGGGGGAG	STREME-1	transcript_PVP01_1340800.1	4242	4249	.	9.35	GGGUGGAG
1-GGGGGGAG	STREME-1	transcript_PVP01_0940300.1	1784	1791	.	9.35	GGGUGGAG
1-GGGGGGAG	STREME-1	transcript_PVP01_0411300.1	2836	2843	.	9.35	GGUGGGAG
1-GGGGGGAG	STREME-1	transcript_PVP01_0411300.1	4737	4744	.	9.35	GGGUGGAG
1-GGGGGGAG	STREME-1	transcript_PVP01_1225900.1	2504	2511	.	9.35	GGGUGGAG
1-GGGGGGAG	STREME-1	transcript_PVP01_1433900.1	1941	1948	.	9.35	GGGUGGAG
1-GGGGGGAG	STREME-1	transcript_PVP01_1407400.1	9467	9474	.	9.35	GGGUGGAG
1-GGGGGGAG	STREME-1	transcript_PVP01_1020200.1	3263	3270	.	9.35	GGUGGGAG
1-GGGGGGAG	STREME-1	transcript_PVP01_1414900.1	3267	3274	.	9.35	GGGUGGAG
1-GGGGGGAG	STREME-1	transcript_PVP01_1345000.1	2297	2304	.	9.35	GGGUGGAG
1-GGGGGGAG	STREME-1	transcript_PVP01_0828600.1	1467	1474	.	9.35	GGGUGGAG
1-GGGGGGAG	STREME-1	transcript_PVP01_1320400.1	86	93	.	9.35	GGGUGGAG
1-GGGGGGAG	STREME-1	transcript_PVP01_1227300.1	568	575	.	9.35	GGUGGGAG
1-GGGGGGAG	STREME-1	transcript_PVP01_0803500.1	4997	5004	.	9.35	GGGUGGAG
1-GGGGGGAG	STREME-1	transcript_PVP01_1114000.1	689	696	.	9.35	GGUGGGAG
1-GGGGGGAG	STREME-1	transcript_PVP01_0604500.1	3562	3569	.	9.35	GGGUGGAG
1-GGGGGGAG	STREME-1	transcript_PVP01_0727800.1	1384	1391	.	9.35	GGUGGGAG
1-GGGGGGAG	STREME-1	transcript_PVP01_0933300.1	2138	2145	.	9.35	GGGUGGAG
1-GGGGGGAG	STREME-1	transcript_PVP01_1269100.1	1767	1774	.	9.35	GGUGGGAG
1-GGGGGGAG	STREME-1	transcript_PVP01_0935400.1	4467	4474	.	9.35	GGGUGGAG
1-GGGGGGAG	STREME-1	transcript_PVP01_0935400.1	5230	5237	.	9.35	GGUGGGAG
1-GGGGGGAG	STREME-1	transcript_PVP01_0814800.1	3196	3203	.	9.35	GGUGGGAG
1-GGGGGGAG	STREME-1	transcript_PVP01_1117300.1	1502	1509	.	9.35	GGGUGGAG
1-GGGGGGAG	STREME-1	transcript_PVP01_0819800.1	2425	2432	.	9.35	GGUGGGAG
1-GGGGGGAG	STREME-1	transcript_PVP01_1106100.1	1881	1888	.	9.35	GGGUGGAG
1-GGGGGGAG	STREME-1	transcript_PVP01_1463800.1	2170	2177	.	9.35	GGUGGGAG
1-GGGGGGAG	STREME-1	transcript_PVP01_1323700.1	147	154	.	9.35	GGGUGGAG
1-GGGGGGAG	STREME-1	transcript_PVP01_1323700.1	883	890	.	9.35	GGUGGGAG
1-GGGGGGAG	STREME-1	transcript_PVP01_1323700.1	922	929	.	9.35	GGUGGGAG
1-GGGGGGAG	STREME-1	transcript_PVP01_1323700.1	976	983	.	9.35	GGUGGGAG
1-GGGGGGAG	STREME-1	transcript_PVP01_1323700.1	3117	3124	.	9.35	GGUGGGAG
1-GGGGGGAG	STREME-1	transcript_PVP01_0713900.1	1322	1329	.	9.35	GGGUGGAG
1-GGGGGGAG	STREME-1	transcript_PVP01_0507200.1	3408	3415	.	9.35	GGGUGGAG
1-GGGGGGAG	STREME-1	transcript_PVP01_0832300.1	4498	4505	.	9.35	GGGUGGAG
1-GGGGGGAG	STREME-1	transcript_PVP01_1236700.1	1742	1749	.	9.35	GGGUGGAG
1-GGGGGGAG	STREME-1	transcript_PVP01_1406200.1	7032	7039	.	9.35	GGGUGGAG
1-GGGGGGAG	STREME-1	transcript_PVP01_0708400.1	678	685	.	9.35	GGGUGGAG
1-GGGGGGAG	STREME-1	transcript_PVP01_1336400.1	2898	2905	.	9.35	GGUGGGAG
1-GGGGGGAG	STREME-1	transcript_PVP01_1315800.1	3916	3923	.	9.35	GGUGGGAG
1-GGGGGGAG	STREME-1	transcript_PVP01_1432200.1	2491	2498	.	9.35	GGUGGGAG
1-GGGGGGAG	STREME-1	transcript_PVP01_1342200.1	1472	1479	.	9.35	GGUGGGAG
1-GGGGGGAG	STREME-1	transcript_PVP01_0414400.1	110	117	.	9.35	GGGUGGAG
1-GGGGGGAG	STREME-1	transcript_PVP01_1464900.1	2377	2384	.	9.35	GGUGGGAG
1-GGGGGGAG	STREME-1	transcript_PVP01_1267300.1	1568	1575	.	9.35	GGUGGGAG
1-GGGGGGAG	STREME-1	transcript_PVP01_0921200.1	3211	3218	.	9.35	GGGUGGAG
1-GGGGGGAG	STREME-1	transcript_PVP01_1444200.1	2179	2186	.	9.35	GGUGGGAG
1-GGGGGGAG	STREME-1	transcript_PVP01_1455200.1	1200	1207	.	9.35	GGGUGGAG
1-GGGGGGAG	STREME-1	transcript_PVP01_0614200.1	643	650	.	9.35	GGUGGGAG
1-GGGGGGAG	STREME-1	transcript_PVP01_1267800.1	1145	1152	.	9.35	GGUGGGAG
1-GGGGGGAG	STREME-1	transcript_PVP01_1022100.1	821	828	.	9.35	GGUGGGAG
1-GGGGGGAG	STREME-1	transcript_PVP01_1415800.1	2781	2788	.	9.35	GGUGGGAG
1-GGGGGGAG	STREME-1	transcript_PVP01_1111000.1	2136	2143	.	9.35	GGGUGGAG
1-GGGGGGAG	STREME-1	transcript_PVP01_0306600.1	388	395	.	9.35	GGGUGGAG
1-GGGGGGAG	STREME-1	transcript_PVP01_1234900.1	2223	2230	.	9.35	GGGUGGAG
1-GGGGGGAG	STREME-1	transcript_PVP01_0837600.1	4463	4470	.	9.35	GGUGGGAG
1-GGGGGGAG	STREME-1	transcript_PVP01_1136100.1	1632	1639	.	9.35	GGUGGGAG
1-GGGGGGAG	STREME-1	transcript_PVP01_0409700.1	74	81	.	9.35	GGGUGGAG
1-GGGGGGAG	STREME-1	transcript_PVP01_1452500.1	2387	2394	.	9.35	GGGUGGAG
1-GGGGGGAG	STREME-1	transcript_PVP01_0725100.1	1704	1711	.	9.35	GGUGGGAG
1-GGGGGGAG	STREME-1	transcript_PVP01_0207300.1	4834	4841	.	9.35	GGGUGGAG
1-GGGGGGAG	STREME-1	transcript_PVP01_0207300.1	9466	9473	.	9.35	GGGUGGAG
1-GGGGGGAG	STREME-1	transcript_PVP01_0208100.1	3244	3251	.	9.35	GGGUGGAG
1-GGGGGGAG	STREME-1	transcript_PVP01_1215200.1	447	454	.	9.35	GGGUGGAG
1-GGGGGGAG	STREME-1	transcript_PVP01_0827300.1	525	532	.	9.35	GGGUGGAG
1-GGGGGGAG	STREME-1	transcript_PVP01_0827300.1	532	539	.	9.35	GGUGGGAG
1-GGGGGGAG	STREME-1	transcript_PVP01_0918300.1	3069	3076	.	9.35	GGUGGGAG
1-GGGGGGAG	STREME-1	transcript_PVP01_0728700.1	2524	2531	.	9.35	GGUGGGAG
1-GGGGGGAG	STREME-1	transcript_PVP01_0619400.1	564	571	.	9.35	GGUGGGAG
1-GGGGGGAG	STREME-1	transcript_PVP01_0832600.1	154	161	.	9.35	GGUGGGAG
1-GGGGGGAG	STREME-1	transcript_PVP01_1023700.1	2424	2431	.	9.35	GGUGGGAG
1-GGGGGGAG	STREME-1	transcript_PVP01_0209300.1	248	255	.	9.35	GGUGGGAG
1-GGGGGGAG	STREME-1	transcript_PVP01_0705800.1	1680	1687	.	9.35	GGGUGGAG
1-GGGGGGAG	STREME-1	transcript_PVP01_1321700.1	2303	2310	.	9.35	GGUGGGAG
1-GGGGGGAG	STREME-1	transcript_PVP01_0945700.1	508	515	.	9.35	GGGUGGAG
1-GGGGGGAG	STREME-1	transcript_PVP01_0945700.1	3217	3224	.	9.35	GGUGGGAG
1-GGGGGGAG	STREME-1	transcript_PVP01_0945700.1	3698	3705	.	9.35	GGUGGGAG
1-GGGGGGAG	STREME-1	transcript_PVP01_0108500.1	1840	1847	.	9.35	GGGUGGAG
1-GGGGGGAG	STREME-1	transcript_PVP01_1256100.1	1161	1168	.	9.35	GGUGGGAG
1-GGGGGGAG	STREME-1	transcript_PVP01_0526400.1	582	589	.	9.22	GGGGUGAG
1-GGGGGGAG	STREME-1	transcript_PVP01_0923500.1	14465	14472	.	9.22	GGGGUGAG
1-GGGGGGAG	STREME-1	transcript_PVP01_0318700.1	765	772	.	9.22	GGGGUGAG
1-GGGGGGAG	STREME-1	transcript_PVP01_1252400.1	2052	2059	.	9.22	GGGGUGAG
1-GGGGGGAG	STREME-1	transcript_PVP01_1004600.1	451	458	.	9.22	GGGGUGAG
1-GGGGGGAG	STREME-1	transcript_PVP01_1205800.1	806	813	.	9.22	GGGGUGAG
1-GGGGGGAG	STREME-1	transcript_PVP01_0945200.1	1982	1989	.	9.22	GGGGUGAG
1-GGGGGGAG	STREME-1	transcript_PVP01_1223500.1	1374	1381	.	9.22	GGGGUGAG
1-GGGGGGAG	STREME-1	transcript_PVP01_0621600.1	2370	2377	.	9.22	GGGGUGAG
1-GGGGGGAG	STREME-1	transcript_PVP01_0918900.1	5003	5010	.	9.22	GGGGUGAG
1-GGGGGGAG	STREME-1	transcript_PVP01_0810500.1	4113	4120	.	9.22	GGGGUGAG
1-GGGGGGAG	STREME-1	transcript_PVP01_0944400.1	613	620	.	9.22	GGGGUGAG
1-GGGGGGAG	STREME-1	transcript_PVP01_1114000.1	307	314	.	9.22	GGGGUGAG
1-GGGGGGAG	STREME-1	transcript_PVP01_0923200.1	1570	1577	.	9.22	GGGGUGAG
1-GGGGGGAG	STREME-1	transcript_PVP01_0506300.1	158	165	.	9.22	GGGGUGAG
1-GGGGGGAG	STREME-1	transcript_PVP01_0405900.1	2357	2364	.	9.22	GGGGUGAG
1-GGGGGGAG	STREME-1	transcript_PVP01_1261700.1	1606	1613	.	9.22	GGGGUGAG
1-GGGGGGAG	STREME-1	transcript_PVP01_0507200.1	2098	2105	.	9.22	GGGGUGAG
1-GGGGGGAG	STREME-1	transcript_PVP01_1141700.1	1072	1079	.	9.22	GGGGUGAG
1-GGGGGGAG	STREME-1	transcript_PVP01_0832300.1	3201	3208	.	9.22	GGGGUGAG
1-GGGGGGAG	STREME-1	transcript_PVP01_0820400.1	1903	1910	.	9.22	GGGGUGAG
1-GGGGGGAG	STREME-1	transcript_PVP01_1140700.1	3335	3342	.	9.22	GGGGUGAG
1-GGGGGGAG	STREME-1	transcript_PVP01_0113900.1	906	913	.	9.22	GGGGUGAG
1-GGGGGGAG	STREME-1	transcript_PVP01_0113900.1	2735	2742	.	9.22	GGGGUGAG
1-GGGGGGAG	STREME-1	transcript_PVP01_0517000.1	912	919	.	9.22	GGGGUGAG
1-GGGGGGAG	STREME-1	transcript_PVP01_0114500.1	2473	2480	.	9.22	GGGGUGAG
1-GGGGGGAG	STREME-1	transcript_PVP01_1342200.1	464	471	.	9.22	GGGGUGAG
1-GGGGGGAG	STREME-1	transcript_PVP01_1455200.1	2885	2892	.	9.22	GGGGUGAG
1-GGGGGGAG	STREME-1	transcript_PVP01_1255400.1	856	863	.	9.22	GGGGUGAG
1-GGGGGGAG	STREME-1	transcript_PVP01_1111000.1	4536	4543	.	9.22	GGGGUGAG
1-GGGGGGAG	STREME-1	transcript_PVP01_1136100.1	521	528	.	9.22	GGGGUGAG
1-GGGGGGAG	STREME-1	transcript_PVP01_0728800.1	5108	5115	.	9.22	GGGGUGAG
1-GGGGGGAG	STREME-1	transcript_PVP01_1013800.1	2467	2474	.	9.22	GGGGUGAG
1-GGGGGGAG	STREME-1	transcript_PVP01_0725100.1	2833	2840	.	9.22	GGGGUGAG
1-GGGGGGAG	STREME-1	transcript_PVP01_0207300.1	3449	3456	.	9.22	GGGGUGAG
1-GGGGGGAG	STREME-1	transcript_PVP01_0939300.1	169	176	.	9.22	GGGGUGAG
1-GGGGGGAG	STREME-1	transcript_PVP01_1467700.1	3255	3262	.	9.22	GGGGUGAG
1-GGGGGGAG	STREME-1	transcript_PVP01_1023700.1	651	658	.	9.22	GGGGUGAG
1-GGGGGGAG	STREME-1	transcript_PVP01_1326600.1	2993	3000	.	9.22	GGGGUGAG
1-GGGGGGAG	STREME-1	transcript_PVP01_0215600.1	7770	7777	.	9.22	GGGGUGAG
1-GGGGGGAG	STREME-1	transcript_PVP01_0719200.1	494	501	.	9.09	GGGGCGAG
1-GGGGGGAG	STREME-1	transcript_PVP01_0713700.1	2072	2079	.	9.09	GGGGCGAG
1-GGGGGGAG	STREME-1	transcript_PVP01_0923500.1	4673	4680	.	9.09	GGGGCGAG
1-GGGGGGAG	STREME-1	transcript_PVP01_1128300.1	1826	1833	.	9.09	GGGGCGAG
1-GGGGGGAG	STREME-1	transcript_PVP01_1233000.1	664	671	.	9.09	GGGGCGAG
1-GGGGGGAG	STREME-1	transcript_PVP01_1314700.1	1242	1249	.	9.09	GGGGCGAG
1-GGGGGGAG	STREME-1	transcript_PVP01_1020900.1	1681	1688	.	9.09	GGGGCGAG
1-GGGGGGAG	STREME-1	transcript_PVP01_0210800.1	2521	2528	.	9.09	GGGGCGAG
1-GGGGGGAG	STREME-1	transcript_PVP01_1425300.1	37	44	.	9.09	GGGGCGAG
1-GGGGGGAG	STREME-1	transcript_PVP01_0522600.1	2149	2156	.	9.09	GGGGCGAG
1-GGGGGGAG	STREME-1	transcript_PVP01_1121100.1	197	204	.	9.09	GGGGCGAG
1-GGGGGGAG	STREME-1	transcript_PVP01_1407400.1	236	243	.	9.09	GGGGCGAG
1-GGGGGGAG	STREME-1	transcript_PVP01_1011000.1	10406	10413	.	9.09	GGGGCGAG
1-GGGGGGAG	STREME-1	transcript_PVP01_0817600.1	4639	4646	.	9.09	GGGGCGAG
1-GGGGGGAG	STREME-1	transcript_PVP01_1103200.1	234	241	.	9.09	GGGGCGAG
1-GGGGGGAG	STREME-1	transcript_PVP01_0939600.1	883	890	.	9.09	GGGGCGAG
1-GGGGGGAG	STREME-1	transcript_PVP01_0819000.1	875	882	.	9.09	GGGGCGAG
1-GGGGGGAG	STREME-1	transcript_PVP01_0514900.1	1446	1453	.	9.09	GGGGCGAG
1-GGGGGGAG	STREME-1	transcript_PVP01_0832300.1	6472	6479	.	9.09	GGGGCGAG
1-GGGGGGAG	STREME-1	transcript_PVP01_1405400.1	79	86	.	9.09	GGGGCGAG
1-GGGGGGAG	STREME-1	transcript_PVP01_1336400.1	95	102	.	9.09	GGGGCGAG
1-GGGGGGAG	STREME-1	transcript_PVP01_0526000.1	379	386	.	9.09	GGGGCGAG
1-GGGGGGAG	STREME-1	transcript_PVP01_0930100.1	1192	1199	.	9.09	GGGGCGAG
1-GGGGGGAG	STREME-1	transcript_PVP01_1464900.1	2405	2412	.	9.09	GGGGCGAG
1-GGGGGGAG	STREME-1	transcript_PVP01_0921200.1	8280	8287	.	9.09	GGGGCGAG
1-GGGGGGAG	STREME-1	transcript_PVP01_1455200.1	3585	3592	.	9.09	GGGGCGAG
1-GGGGGGAG	STREME-1	transcript_PVP01_1308600.1	200	207	.	9.09	GGGGCGAG
1-GGGGGGAG	STREME-1	transcript_PVP01_0802100.1	715	722	.	9.09	GGGGCGAG
1-GGGGGGAG	STREME-1	transcript_PVP01_1012000.1	1432	1439	.	9.09	GGGGCGAG
1-GGGGGGAG	STREME-1	transcript_PVP01_0725700.1	4112	4119	.	9.09	GGGGCGAG
1-GGGGGGAG	STREME-1	transcript_PVP01_1003200.1	1862	1869	.	9.09	GGGGCGAG
1-GGGGGGAG	STREME-1	transcript_PVP01_1427000.1	991	998	.	9.09	GGGGCGAG
1-GGGGGGAG	STREME-1	transcript_PVP01_0617100.1	237	244	.	8.82	GGGGGCAG
1-GGGGGGAG	STREME-1	transcript_PVP01_0617100.1	1664	1671	.	8.82	GGGGGCAG
1-GGGGGGAG	STREME-1	transcript_PVP01_1270300.1	10374	10381	.	8.82	GGGGGCAG
1-GGGGGGAG	STREME-1	transcript_PVP01_0411700.1	652	659	.	8.82	GGGGGCAG
1-GGGGGGAG	STREME-1	transcript_PVP01_0609600.1	727	734	.	8.82	GGGGGCAG
1-GGGGGGAG	STREME-1	transcript_PVP01_1220900.1	2033	2040	.	8.82	GGGGGCAG
1-GGGGGGAG	STREME-1	transcript_PVP01_1450100.1	183	190	.	8.82	GGGGGCAG
1-GGGGGGAG	STREME-1	transcript_PVP01_1429000.1	5555	5562	.	8.82	GGGGGCAG
1-GGGGGGAG	STREME-1	transcript_PVP01_1429000.1	7400	7407	.	8.82	GGGGGCAG
1-GGGGGGAG	STREME-1	transcript_PVP01_0923500.1	2331	2338	.	8.82	GGGGGCAG
1-GGGGGGAG	STREME-1	transcript_PVP01_0940100.1	6678	6685	.	8.82	GGGGGCAG
1-GGGGGGAG	STREME-1	transcript_PVP01_1120700.1	871	878	.	8.82	GGGGGCAG
1-GGGGGGAG	STREME-1	transcript_PVP01_0207900.1	389	396	.	8.82	GGGGGCAG
1-GGGGGGAG	STREME-1	transcript_PVP01_1233500.1	1266	1273	.	8.82	GGGGGCAG
1-GGGGGGAG	STREME-1	transcript_PVP01_1252400.1	281	288	.	8.82	GGGGGCAG
1-GGGGGGAG	STREME-1	transcript_PVP01_0718800.1	2732	2739	.	8.82	GGGGGCAG
1-GGGGGGAG	STREME-1	transcript_PVP01_0719400.1	69	76	.	8.82	GGGGGCAG
1-GGGGGGAG	STREME-1	transcript_PVP01_0705100.1	9468	9475	.	8.82	GGGGGCAG
1-GGGGGGAG	STREME-1	transcript_PVP01_1239500.1	507	514	.	8.82	GGGGGCAG
1-GGGGGGAG	STREME-1	transcript_PVP01_0517400.1	40	47	.	8.82	GGGGGCAG
1-GGGGGGAG	STREME-1	transcript_PVP01_0517400.1	854	861	.	8.82	GGGGGCAG
1-GGGGGGAG	STREME-1	transcript_PVP01_1208600.1	2349	2356	.	8.82	GGGGGCAG
1-GGGGGGAG	STREME-1	transcript_PVP01_1309700.1	1016	1023	.	8.82	GGGGGCAG
1-GGGGGGAG	STREME-1	transcript_PVP01_0835900.1	1508	1515	.	8.82	GGGGGCAG
1-GGGGGGAG	STREME-1	transcript_PVP01_1262900.1	3304	3311	.	8.82	GGGGGCAG
1-GGGGGGAG	STREME-1	transcript_PVP01_1270800.1	252	259	.	8.82	GGGGGCAG
1-GGGGGGAG	STREME-1	transcript_PVP01_1270800.1	279	286	.	8.82	GGGGGCAG
1-GGGGGGAG	STREME-1	transcript_PVP01_1270800.1	306	313	.	8.82	GGGGGCAG
1-GGGGGGAG	STREME-1	transcript_PVP01_0621600.1	5030	5037	.	8.82	GGGGGCAG
1-GGGGGGAG	STREME-1	transcript_PVP01_1426600.1	438	445	.	8.82	GGGGGCAG
1-GGGGGGAG	STREME-1	transcript_PVP01_0411300.1	1663	1670	.	8.82	GGGGGCAG
1-GGGGGGAG	STREME-1	transcript_PVP01_0514500.1	4334	4341	.	8.82	GGGGGCAG
1-GGGGGGAG	STREME-1	transcript_PVP01_0805400.1	410	417	.	8.82	GGGGGCAG
1-GGGGGGAG	STREME-1	transcript_PVP01_1330000.1	450	457	.	8.82	GGGGGCAG
1-GGGGGGAG	STREME-1	transcript_PVP01_1345800.1	665	672	.	8.82	GGGGGCAG
1-GGGGGGAG	STREME-1	transcript_PVP01_1407400.1	11063	11070	.	8.82	GGGGGCAG
1-GGGGGGAG	STREME-1	transcript_PVP01_0406700.1	1298	1305	.	8.82	GGGGGCAG
1-GGGGGGAG	STREME-1	transcript_PVP01_0904400.1	1922	1929	.	8.82	GGGGGCAG
1-GGGGGGAG	STREME-1	transcript_PVP01_1011000.1	6803	6810	.	8.82	GGGGGCAG
1-GGGGGGAG	STREME-1	transcript_PVP01_0727800.1	294	301	.	8.82	GGGGGCAG
1-GGGGGGAG	STREME-1	transcript_PVP01_1420200.1	1576	1583	.	8.82	GGGGGCAG
1-GGGGGGAG	STREME-1	transcript_PVP01_1405700.1	3754	3761	.	8.82	GGGGGCAG
1-GGGGGGAG	STREME-1	transcript_PVP01_1405700.1	4697	4704	.	8.82	GGGGGCAG
1-GGGGGGAG	STREME-1	transcript_PVP01_0819800.1	1819	1826	.	8.82	GGGGGCAG
1-GGGGGGAG	STREME-1	transcript_PVP01_1103200.1	2650	2657	.	8.82	GGGGGCAG
1-GGGGGGAG	STREME-1	transcript_PVP01_1103200.1	3043	3050	.	8.82	GGGGGCAG
1-GGGGGGAG	STREME-1	transcript_PVP01_1015200.1	1097	1104	.	8.82	GGGGGCAG
1-GGGGGGAG	STREME-1	transcript_PVP01_1306900.1	2410	2417	.	8.82	GGGGGCAG
1-GGGGGGAG	STREME-1	transcript_PVP01_1339200.1	747	754	.	8.82	GGGGGCAG
1-GGGGGGAG	STREME-1	transcript_PVP01_1411100.1	1763	1770	.	8.82	GGGGGCAG
1-GGGGGGAG	STREME-1	transcript_PVP01_0601900.1	267	274	.	8.82	GGGGGCAG
1-GGGGGGAG	STREME-1	transcript_PVP01_1344000.1	410	417	.	8.82	GGGGGCAG
1-GGGGGGAG	STREME-1	transcript_PVP01_0507200.1	2111	2118	.	8.82	GGGGGCAG
1-GGGGGGAG	STREME-1	transcript_PVP01_0830300.1	2359	2366	.	8.82	GGGGGCAG
1-GGGGGGAG	STREME-1	transcript_PVP01_0832300.1	2919	2926	.	8.82	GGGGGCAG
1-GGGGGGAG	STREME-1	transcript_PVP01_1459100.1	1812	1819	.	8.82	GGGGGCAG
1-GGGGGGAG	STREME-1	transcript_PVP01_0937500.1	5407	5414	.	8.82	GGGGGCAG
1-GGGGGGAG	STREME-1	transcript_PVP01_1236700.1	2472	2479	.	8.82	GGGGGCAG
1-GGGGGGAG	STREME-1	transcript_PVP01_1236700.1	2651	2658	.	8.82	GGGGGCAG
1-GGGGGGAG	STREME-1	transcript_PVP01_1247200.1	679	686	.	8.82	GGGGGCAG
1-GGGGGGAG	STREME-1	transcript_PVP01_1468600.1	2665	2672	.	8.82	GGGGGCAG
1-GGGGGGAG	STREME-1	transcript_PVP01_0921200.1	3795	3802	.	8.82	GGGGGCAG
1-GGGGGGAG	STREME-1	transcript_PVP01_0921200.1	6979	6986	.	8.82	GGGGGCAG
1-GGGGGGAG	STREME-1	transcript_PVP01_0411900.1	774	781	.	8.82	GGGGGCAG
1-GGGGGGAG	STREME-1	transcript_PVP01_1455200.1	3574	3581	.	8.82	GGGGGCAG
1-GGGGGGAG	STREME-1	transcript_PVP01_0714600.1	1192	1199	.	8.82	GGGGGCAG
1-GGGGGGAG	STREME-1	transcript_PVP01_1428300.1	2069	2076	.	8.82	GGGGGCAG
1-GGGGGGAG	STREME-1	transcript_PVP01_0313800.1	2144	2151	.	8.82	GGGGGCAG
1-GGGGGGAG	STREME-1	transcript_PVP01_0719700.1	4170	4177	.	8.82	GGGGGCAG
1-GGGGGGAG	STREME-1	transcript_PVP01_0719700.1	4337	4344	.	8.82	GGGGGCAG
1-GGGGGGAG	STREME-1	transcript_PVP01_0719700.1	4712	4719	.	8.82	GGGGGCAG
1-GGGGGGAG	STREME-1	transcript_PVP01_0319900.1	1902	1909	.	8.82	GGGGGCAG
1-GGGGGGAG	STREME-1	transcript_PVP01_1111000.1	14	21	.	8.82	GGGGGCAG
1-GGGGGGAG	STREME-1	transcript_PVP01_1341600.1	572	579	.	8.82	GGGGGCAG
1-GGGGGGAG	STREME-1	transcript_PVP01_0308000.1	1957	1964	.	8.82	GGGGGCAG
1-GGGGGGAG	STREME-1	transcript_PVP01_0308000.1	2131	2138	.	8.82	GGGGGCAG
1-GGGGGGAG	STREME-1	transcript_PVP01_1234900.1	6650	6657	.	8.82	GGGGGCAG
1-GGGGGGAG	STREME-1	transcript_PVP01_0837600.1	166	173	.	8.82	GGGGGCAG
1-GGGGGGAG	STREME-1	transcript_PVP01_0304200.1	1866	1873	.	8.82	GGGGGCAG
1-GGGGGGAG	STREME-1	transcript_PVP01_0922400.1	3897	3904	.	8.82	GGGGGCAG
1-GGGGGGAG	STREME-1	transcript_PVP01_1303400.1	2666	2673	.	8.82	GGGGGCAG
1-GGGGGGAG	STREME-1	transcript_PVP01_1242500.1	2868	2875	.	8.82	GGGGGCAG
1-GGGGGGAG	STREME-1	transcript_PVP01_0725700.1	2294	2301	.	8.82	GGGGGCAG
1-GGGGGGAG	STREME-1	transcript_PVP01_0725700.1	4398	4405	.	8.82	GGGGGCAG
1-GGGGGGAG	STREME-1	transcript_PVP01_1261200.1	4388	4395	.	8.82	GGGGGCAG
1-GGGGGGAG	STREME-1	transcript_PVP01_0207300.1	2543	2550	.	8.82	GGGGGCAG
1-GGGGGGAG	STREME-1	transcript_PVP01_0916200.1	2229	2236	.	8.82	GGGGGCAG
1-GGGGGGAG	STREME-1	transcript_PVP01_0809200.1	1771	1778	.	8.82	GGGGGCAG
1-GGGGGGAG	STREME-1	transcript_PVP01_1007800.1	3810	3817	.	8.82	GGGGGCAG
1-GGGGGGAG	STREME-1	transcript_PVP01_0941200.1	5529	5536	.	8.82	GGGGGCAG
1-GGGGGGAG	STREME-1	transcript_PVP01_1207200.1	1460	1467	.	8.82	GGGGGCAG
1-GGGGGGAG	STREME-1	transcript_PVP01_1448700.1	1062	1069	.	8.82	GGGGGCAG
1-GGGGGGAG	STREME-1	transcript_PVP01_0306900.1	664	671	.	8.82	GGGGGCAG
1-GGGGGGAG	STREME-1	transcript_PVP01_0938900.1	1639	1646	.	8.82	GGGGGCAG
1-GGGGGGAG	STREME-1	transcript_PVP01_0807500.1	1352	1359	.	8.82	GGGGGCAG
1-GGGGGGAG	STREME-1	transcript_PVP01_1212400.1	2499	2506	.	8.82	GGGGGCAG
1-GGGGGGAG	STREME-1	transcript_PVP01_0822200.1	845	852	.	8.82	GGGGGCAG
1-GGGGGGAG	STREME-1	transcript_PVP01_0508300.1	1385	1392	.	8.82	GCGGGGAG
1-GGGGGGAG	STREME-1	transcript_PVP01_0609600.1	199	206	.	8.82	GCGGGGAG
1-GGGGGGAG	STREME-1	transcript_PVP01_1220900.1	798	805	.	8.82	GCGGGGAG
1-GGGGGGAG	STREME-1	transcript_PVP01_1227400.1	2993	3000	.	8.82	GCGGGGAG
1-GGGGGGAG	STREME-1	transcript_PVP01_0923500.1	10856	10863	.	8.82	GCGGGGAG
1-GGGGGGAG	STREME-1	transcript_PVP01_0923500.1	14648	14655	.	8.82	GCGGGGAG
1-GGGGGGAG	STREME-1	transcript_PVP01_1115700.1	1385	1392	.	8.82	GCGGGGAG
1-GGGGGGAG	STREME-1	transcript_PVP01_0725800.1	518	525	.	8.82	GCGGGGAG
1-GGGGGGAG	STREME-1	transcript_PVP01_0725800.1	3584	3591	.	8.82	GCGGGGAG
1-GGGGGGAG	STREME-1	transcript_PVP01_1212600.1	1245	1252	.	8.82	GCGGGGAG
1-GGGGGGAG	STREME-1	transcript_PVP01_1223500.1	459	466	.	8.82	GCGGGGAG
1-GGGGGGAG	STREME-1	transcript_PVP01_0726600.1	2201	2208	.	8.82	GCGGGGAG
1-GGGGGGAG	STREME-1	transcript_PVP01_1426600.1	2394	2401	.	8.82	GCGGGGAG
1-GGGGGGAG	STREME-1	transcript_PVP01_1242600.1	530	537	.	8.82	GCGGGGAG
1-GGGGGGAG	STREME-1	transcript_PVP01_1453900.1	5280	5287	.	8.82	GCGGGGAG
1-GGGGGGAG	STREME-1	transcript_PVP01_0514500.1	533	540	.	8.82	GCGGGGAG
1-GGGGGGAG	STREME-1	transcript_PVP01_1255100.1	3196	3203	.	8.82	GCGGGGAG
1-GGGGGGAG	STREME-1	transcript_PVP01_1247900.1	1690	1697	.	8.82	GCGGGGAG
1-GGGGGGAG	STREME-1	transcript_PVP01_1307300.1	3723	3730	.	8.82	GCGGGGAG
1-GGGGGGAG	STREME-1	transcript_PVP01_0204200.1	1082	1089	.	8.82	GCGGGGAG
1-GGGGGGAG	STREME-1	transcript_PVP01_1222600.1	668	675	.	8.82	GCGGGGAG
1-GGGGGGAG	STREME-1	transcript_PVP01_0803500.1	2008	2015	.	8.82	GCGGGGAG
1-GGGGGGAG	STREME-1	transcript_PVP01_1011000.1	5062	5069	.	8.82	GCGGGGAG
1-GGGGGGAG	STREME-1	transcript_PVP01_0604500.1	1318	1325	.	8.82	GCGGGGAG
1-GGGGGGAG	STREME-1	transcript_PVP01_1033300.1	3565	3572	.	8.82	GCGGGGAG
1-GGGGGGAG	STREME-1	transcript_PVP01_1329800.1	1378	1385	.	8.82	GCGGGGAG
1-GGGGGGAG	STREME-1	transcript_PVP01_1329800.1	2978	2985	.	8.82	GCGGGGAG
1-GGGGGGAG	STREME-1	transcript_PVP01_0505700.1	3773	3780	.	8.82	GCGGGGAG
1-GGGGGGAG	STREME-1	transcript_PVP01_0923200.1	1548	1555	.	8.82	GCGGGGAG
1-GGGGGGAG	STREME-1	transcript_PVP01_1420200.1	1556	1563	.	8.82	GCGGGGAG
1-GGGGGGAG	STREME-1	transcript_PVP01_0411500.1	644	651	.	8.82	GCGGGGAG
1-GGGGGGAG	STREME-1	transcript_PVP01_0819800.1	9973	9980	.	8.82	GCGGGGAG
1-GGGGGGAG	STREME-1	transcript_PVP01_1344000.1	2370	2377	.	8.82	GCGGGGAG
1-GGGGGGAG	STREME-1	transcript_PVP01_0312500.1	902	909	.	8.82	GCGGGGAG
1-GGGGGGAG	STREME-1	transcript_PVP01_0832300.1	233	240	.	8.82	GCGGGGAG
1-GGGGGGAG	STREME-1	transcript_PVP01_0832300.1	1614	1621	.	8.82	GCGGGGAG
1-GGGGGGAG	STREME-1	transcript_PVP01_0832300.1	6659	6666	.	8.82	GCGGGGAG
1-GGGGGGAG	STREME-1	transcript_PVP01_1024000.1	3044	3051	.	8.82	GCGGGGAG
1-GGGGGGAG	STREME-1	transcript_PVP01_1459100.1	2237	2244	.	8.82	GCGGGGAG
1-GGGGGGAG	STREME-1	transcript_PVP01_1111400.1	391	398	.	8.82	GCGGGGAG
1-GGGGGGAG	STREME-1	transcript_PVP01_1111400.1	8917	8924	.	8.82	GCGGGGAG
1-GGGGGGAG	STREME-1	transcript_PVP01_1267100.1	1666	1673	.	8.82	GCGGGGAG
1-GGGGGGAG	STREME-1	transcript_PVP01_0708400.1	1029	1036	.	8.82	GCGGGGAG
1-GGGGGGAG	STREME-1	transcript_PVP01_1256400.1	1771	1778	.	8.82	GCGGGGAG
1-GGGGGGAG	STREME-1	transcript_PVP01_1009800.1	2205	2212	.	8.82	GCGGGGAG
1-GGGGGGAG	STREME-1	transcript_PVP01_0921200.1	594	601	.	8.82	GCGGGGAG
1-GGGGGGAG	STREME-1	transcript_PVP01_0320800.1	732	739	.	8.82	GCGGGGAG
1-GGGGGGAG	STREME-1	transcript_PVP01_0913600.1	205	212	.	8.82	GCGGGGAG
1-GGGGGGAG	STREME-1	transcript_PVP01_1444200.1	368	375	.	8.82	GCGGGGAG
1-GGGGGGAG	STREME-1	transcript_PVP01_0313800.1	4751	4758	.	8.82	GCGGGGAG
1-GGGGGGAG	STREME-1	transcript_PVP01_0313800.1	10287	10294	.	8.82	GCGGGGAG
1-GGGGGGAG	STREME-1	transcript_PVP01_1415800.1	2809	2816	.	8.82	GCGGGGAG
1-GGGGGGAG	STREME-1	transcript_PVP01_0719700.1	6071	6078	.	8.82	GCGGGGAG
1-GGGGGGAG	STREME-1	transcript_PVP01_1332600.1	1745	1752	.	8.82	GCGGGGAG
1-GGGGGGAG	STREME-1	transcript_PVP01_0716800.1	630	637	.	8.82	GCGGGGAG
1-GGGGGGAG	STREME-1	transcript_PVP01_1237300.1	3010	3017	.	8.82	GCGGGGAG
1-GGGGGGAG	STREME-1	transcript_PVP01_1013400.1	31	38	.	8.82	GCGGGGAG
1-GGGGGGAG	STREME-1	transcript_PVP01_1204100.1	341	348	.	8.82	GCGGGGAG
1-GGGGGGAG	STREME-1	transcript_PVP01_1009700.1	1333	1340	.	8.82	GCGGGGAG
1-GGGGGGAG	STREME-1	transcript_PVP01_0208100.1	2366	2373	.	8.82	GCGGGGAG
1-GGGGGGAG	STREME-1	transcript_PVP01_1310000.1	2881	2888	.	8.82	GCGGGGAG
1-GGGGGGAG	STREME-1	transcript_PVP01_0947400.1	331	338	.	8.82	GCGGGGAG
1-GGGGGGAG	STREME-1	transcript_PVP01_0518400.1	373	380	.	8.82	GCGGGGAG
1-GGGGGGAG	STREME-1	transcript_PVP01_0938900.1	1190	1197	.	8.82	GCGGGGAG
1-GGGGGGAG	STREME-1	transcript_PVP01_1326600.1	2796	2803	.	8.82	GCGGGGAG
1-GGGGGGAG	STREME-1	transcript_PVP01_0704700.1	610	617	.	8.82	GCGGGGAG
1-GGGGGGAG	STREME-1	transcript_PVP01_1212400.1	1412	1419	.	8.82	GCGGGGAG
1-GGGGGGAG	STREME-1	transcript_PVP01_0508300.1	1287	1294	.	8.82	CGGGGGAG
1-GGGGGGAG	STREME-1	transcript_PVP01_1449100.1	573	580	.	8.82	CGGGGGAG
1-GGGGGGAG	STREME-1	transcript_PVP01_1466200.1	1474	1481	.	8.82	CGGGGGAG
1-GGGGGGAG	STREME-1	transcript_PVP01_1466200.1	1522	1529	.	8.82	CGGGGGAG
1-GGGGGGAG	STREME-1	transcript_PVP01_1466200.1	1537	1544	.	8.82	CGGGGGAG
1-GGGGGGAG	STREME-1	transcript_PVP01_0811200.1	2249	2256	.	8.82	CGGGGGAG
1-GGGGGGAG	STREME-1	transcript_PVP01_0314000.1	6432	6439	.	8.82	CGGGGGAG
1-GGGGGGAG	STREME-1	transcript_PVP01_1450100.1	2496	2503	.	8.82	CGGGGGAG
1-GGGGGGAG	STREME-1	transcript_PVP01_1420500.1	3922	3929	.	8.82	CGGGGGAG
1-GGGGGGAG	STREME-1	transcript_PVP01_0923500.1	2151	2158	.	8.82	CGGGGGAG
1-GGGGGGAG	STREME-1	transcript_PVP01_0923500.1	6389	6396	.	8.82	CGGGGGAG
1-GGGGGGAG	STREME-1	transcript_PVP01_0923500.1	14988	14995	.	8.82	CGGGGGAG
1-GGGGGGAG	STREME-1	transcript_PVP01_0940100.1	6371	6378	.	8.82	CGGGGGAG
1-GGGGGGAG	STREME-1	transcript_PVP01_0725800.1	2448	2455	.	8.82	CGGGGGAG
1-GGGGGGAG	STREME-1	transcript_PVP01_0822100.1	860	867	.	8.82	CGGGGGAG
1-GGGGGGAG	STREME-1	transcript_PVP01_1213000.1	700	707	.	8.82	CGGGGGAG
1-GGGGGGAG	STREME-1	transcript_PVP01_0909700.1	973	980	.	8.82	CGGGGGAG
1-GGGGGGAG	STREME-1	transcript_PVP01_1212600.1	2163	2170	.	8.82	CGGGGGAG
1-GGGGGGAG	STREME-1	transcript_PVP01_0214900.1	242	249	.	8.82	CGGGGGAG
1-GGGGGGAG	STREME-1	transcript_PVP01_1233500.1	2079	2086	.	8.82	CGGGGGAG
1-GGGGGGAG	STREME-1	transcript_PVP01_0718800.1	2718	2725	.	8.82	CGGGGGAG
1-GGGGGGAG	STREME-1	transcript_PVP01_1214300.1	1303	1310	.	8.82	CGGGGGAG
1-GGGGGGAG	STREME-1	transcript_PVP01_0945200.1	1553	1560	.	8.82	CGGGGGAG
1-GGGGGGAG	STREME-1	transcript_PVP01_1123000.1	413	420	.	8.82	CGGGGGAG
1-GGGGGGAG	STREME-1	transcript_PVP01_1223500.1	1236	1243	.	8.82	CGGGGGAG
1-GGGGGGAG	STREME-1	transcript_PVP01_1223500.1	1251	1258	.	8.82	CGGGGGAG
1-GGGGGGAG	STREME-1	transcript_PVP01_1223500.1	1266	1273	.	8.82	CGGGGGAG
1-GGGGGGAG	STREME-1	transcript_PVP01_1223500.1	3967	3974	.	8.82	CGGGGGAG
1-GGGGGGAG	STREME-1	transcript_PVP01_0105400.1	9	16	.	8.82	CGGGGGAG
1-GGGGGGAG	STREME-1	transcript_PVP01_1268500.1	503	510	.	8.82	CGGGGGAG
1-GGGGGGAG	STREME-1	transcript_PVP01_1239500.1	423	430	.	8.82	CGGGGGAG
1-GGGGGGAG	STREME-1	transcript_PVP01_1241000.1	14894	14901	.	8.82	CGGGGGAG
1-GGGGGGAG	STREME-1	transcript_PVP01_1437700.1	275	282	.	8.82	CGGGGGAG
1-GGGGGGAG	STREME-1	transcript_PVP01_0409000.1	50	57	.	8.82	CGGGGGAG
1-GGGGGGAG	STREME-1	transcript_PVP01_0409000.1	4742	4749	.	8.82	CGGGGGAG
1-GGGGGGAG	STREME-1	transcript_PVP01_1425300.1	1872	1879	.	8.82	CGGGGGAG
1-GGGGGGAG	STREME-1	transcript_PVP01_0726600.1	383	390	.	8.82	CGGGGGAG
1-GGGGGGAG	STREME-1	transcript_PVP01_0726600.1	856	863	.	8.82	CGGGGGAG
1-GGGGGGAG	STREME-1	transcript_PVP01_1426600.1	4503	4510	.	8.82	CGGGGGAG
1-GGGGGGAG	STREME-1	transcript_PVP01_0421700.1	296	303	.	8.82	CGGGGGAG
1-GGGGGGAG	STREME-1	transcript_PVP01_1340800.1	2146	2153	.	8.82	CGGGGGAG
1-GGGGGGAG	STREME-1	transcript_PVP01_1340800.1	3744	3751	.	8.82	CGGGGGAG
1-GGGGGGAG	STREME-1	transcript_PVP01_1453900.1	2629	2636	.	8.82	CGGGGGAG
1-GGGGGGAG	STREME-1	transcript_PVP01_1453900.1	2772	2779	.	8.82	CGGGGGAG
1-GGGGGGAG	STREME-1	transcript_PVP01_1453900.1	3795	3802	.	8.82	CGGGGGAG
1-GGGGGGAG	STREME-1	transcript_PVP01_1318200.1	708	715	.	8.82	CGGGGGAG
1-GGGGGGAG	STREME-1	transcript_PVP01_1318200.1	1247	1254	.	8.82	CGGGGGAG
1-GGGGGGAG	STREME-1	transcript_PVP01_1318200.1	2133	2140	.	8.82	CGGGGGAG
1-GGGGGGAG	STREME-1	transcript_PVP01_0918900.1	192	199	.	8.82	CGGGGGAG
1-GGGGGGAG	STREME-1	transcript_PVP01_1225900.1	4015	4022	.	8.82	CGGGGGAG
1-GGGGGGAG	STREME-1	transcript_PVP01_1225900.1	4078	4085	.	8.82	CGGGGGAG
1-GGGGGGAG	STREME-1	transcript_PVP01_1220500.1	2352	2359	.	8.82	CGGGGGAG
1-GGGGGGAG	STREME-1	transcript_PVP01_1407400.1	8936	8943	.	8.82	CGGGGGAG
1-GGGGGGAG	STREME-1	transcript_PVP01_1407400.1	10760	10767	.	8.82	CGGGGGAG
1-GGGGGGAG	STREME-1	transcript_PVP01_1020200.1	1081	1088	.	8.82	CGGGGGAG
1-GGGGGGAG	STREME-1	transcript_PVP01_1266000.1	186	193	.	8.82	CGGGGGAG
1-GGGGGGAG	STREME-1	transcript_PVP01_1108700.1	252	259	.	8.82	CGGGGGAG
1-GGGGGGAG	STREME-1	transcript_PVP01_1345000.1	3758	3765	.	8.82	CGGGGGAG
1-GGGGGGAG	STREME-1	transcript_PVP01_0828600.1	449	456	.	8.82	CGGGGGAG
1-GGGGGGAG	STREME-1	transcript_PVP01_0803500.1	2518	2525	.	8.82	CGGGGGAG
1-GGGGGGAG	STREME-1	transcript_PVP01_0803500.1	5223	5230	.	8.82	CGGGGGAG
1-GGGGGGAG	STREME-1	transcript_PVP01_0727800.1	491	498	.	8.82	CGGGGGAG
1-GGGGGGAG	STREME-1	transcript_PVP01_0727800.1	978	985	.	8.82	CGGGGGAG
1-GGGGGGAG	STREME-1	transcript_PVP01_0505700.1	442	449	.	8.82	CGGGGGAG
1-GGGGGGAG	STREME-1	transcript_PVP01_0916300.1	549	556	.	8.82	CGGGGGAG
1-GGGGGGAG	STREME-1	transcript_PVP01_1107500.1	2207	2214	.	8.82	CGGGGGAG
1-GGGGGGAG	STREME-1	transcript_PVP01_1420200.1	742	749	.	8.82	CGGGGGAG
1-GGGGGGAG	STREME-1	transcript_PVP01_1405700.1	4270	4277	.	8.82	CGGGGGAG
1-GGGGGGAG	STREME-1	transcript_PVP01_0411500.1	1523	1530	.	8.82	CGGGGGAG
1-GGGGGGAG	STREME-1	transcript_PVP01_0834400.1	4609	4616	.	8.82	CGGGGGAG
1-GGGGGGAG	STREME-1	transcript_PVP01_0927500.1	4415	4422	.	8.82	CGGGGGAG
1-GGGGGGAG	STREME-1	transcript_PVP01_1341100.1	4883	4890	.	8.82	CGGGGGAG
1-GGGGGGAG	STREME-1	transcript_PVP01_1306900.1	1325	1332	.	8.82	CGGGGGAG
1-GGGGGGAG	STREME-1	transcript_PVP01_1463800.1	2359	2366	.	8.82	CGGGGGAG
1-GGGGGGAG	STREME-1	transcript_PVP01_0819000.1	2070	2077	.	8.82	CGGGGGAG
1-GGGGGGAG	STREME-1	transcript_PVP01_0707600.1	2093	2100	.	8.82	CGGGGGAG
1-GGGGGGAG	STREME-1	transcript_PVP01_1323700.1	168	175	.	8.82	CGGGGGAG
1-GGGGGGAG	STREME-1	transcript_PVP01_0507200.1	1110	1117	.	8.82	CGGGGGAG
1-GGGGGGAG	STREME-1	transcript_PVP01_0830300.1	958	965	.	8.82	CGGGGGAG
1-GGGGGGAG	STREME-1	transcript_PVP01_0832300.1	1654	1661	.	8.82	CGGGGGAG
1-GGGGGGAG	STREME-1	transcript_PVP01_0832300.1	4564	4571	.	8.82	CGGGGGAG
1-GGGGGGAG	STREME-1	transcript_PVP01_0832300.1	6808	6815	.	8.82	CGGGGGAG
1-GGGGGGAG	STREME-1	transcript_PVP01_0614700.1	803	810	.	8.82	CGGGGGAG
1-GGGGGGAG	STREME-1	transcript_PVP01_1024000.1	1177	1184	.	8.82	CGGGGGAG
1-GGGGGGAG	STREME-1	transcript_PVP01_1459100.1	574	581	.	8.82	CGGGGGAG
1-GGGGGGAG	STREME-1	transcript_PVP01_1111400.1	2972	2979	.	8.82	CGGGGGAG
1-GGGGGGAG	STREME-1	transcript_PVP01_1111400.1	4850	4857	.	8.82	CGGGGGAG
1-GGGGGGAG	STREME-1	transcript_PVP01_1339800.1	89	96	.	8.82	CGGGGGAG
1-GGGGGGAG	STREME-1	transcript_PVP01_0937500.1	4343	4350	.	8.82	CGGGGGAG
1-GGGGGGAG	STREME-1	transcript_PVP01_1236700.1	2364	2371	.	8.82	CGGGGGAG
1-GGGGGGAG	STREME-1	transcript_PVP01_1236700.1	5098	5105	.	8.82	CGGGGGAG
1-GGGGGGAG	STREME-1	transcript_PVP01_1406200.1	7089	7096	.	8.82	CGGGGGAG
1-GGGGGGAG	STREME-1	transcript_PVP01_1126500.1	1696	1703	.	8.82	CGGGGGAG
1-GGGGGGAG	STREME-1	transcript_PVP01_0708400.1	3396	3403	.	8.82	CGGGGGAG
1-GGGGGGAG	STREME-1	transcript_PVP01_1140700.1	977	984	.	8.82	CGGGGGAG
1-GGGGGGAG	STREME-1	transcript_PVP01_1140700.1	1574	1581	.	8.82	CGGGGGAG
1-GGGGGGAG	STREME-1	transcript_PVP01_0103600.1	893	900	.	8.82	CGGGGGAG
1-GGGGGGAG	STREME-1	transcript_PVP01_1334000.1	2122	2129	.	8.82	CGGGGGAG
1-GGGGGGAG	STREME-1	transcript_PVP01_0515100.1	1331	1338	.	8.82	CGGGGGAG
1-GGGGGGAG	STREME-1	transcript_PVP01_1238800.1	6053	6060	.	8.82	CGGGGGAG
1-GGGGGGAG	STREME-1	transcript_PVP01_1109000.1	2701	2708	.	8.82	CGGGGGAG
1-GGGGGGAG	STREME-1	transcript_PVP01_1466100.1	538	545	.	8.82	CGGGGGAG
1-GGGGGGAG	STREME-1	transcript_PVP01_0114500.1	1500	1507	.	8.82	CGGGGGAG
1-GGGGGGAG	STREME-1	transcript_PVP01_0114500.1	2030	2037	.	8.82	CGGGGGAG
1-GGGGGGAG	STREME-1	transcript_PVP01_1342200.1	1486	1493	.	8.82	CGGGGGAG
1-GGGGGGAG	STREME-1	transcript_PVP01_1464900.1	3490	3497	.	8.82	CGGGGGAG
1-GGGGGGAG	STREME-1	transcript_PVP01_1464900.1	3505	3512	.	8.82	CGGGGGAG
1-GGGGGGAG	STREME-1	transcript_PVP01_1464900.1	3520	3527	.	8.82	CGGGGGAG
1-GGGGGGAG	STREME-1	transcript_PVP01_1464900.1	3535	3542	.	8.82	CGGGGGAG
1-GGGGGGAG	STREME-1	transcript_PVP01_1468300.1	1615	1622	.	8.82	CGGGGGAG
1-GGGGGGAG	STREME-1	transcript_PVP01_1468300.1	1630	1637	.	8.82	CGGGGGAG
1-GGGGGGAG	STREME-1	transcript_PVP01_0921200.1	536	543	.	8.82	CGGGGGAG
1-GGGGGGAG	STREME-1	transcript_PVP01_1264400.1	6312	6319	.	8.82	CGGGGGAG
1-GGGGGGAG	STREME-1	transcript_PVP01_0614200.1	1649	1656	.	8.82	CGGGGGAG
1-GGGGGGAG	STREME-1	transcript_PVP01_1022100.1	25	32	.	8.82	CGGGGGAG
1-GGGGGGAG	STREME-1	transcript_PVP01_0313800.1	1150	1157	.	8.82	CGGGGGAG
1-GGGGGGAG	STREME-1	transcript_PVP01_0313800.1	2037	2044	.	8.82	CGGGGGAG
1-GGGGGGAG	STREME-1	transcript_PVP01_0313800.1	5375	5382	.	8.82	CGGGGGAG
1-GGGGGGAG	STREME-1	transcript_PVP01_1232200.1	994	1001	.	8.82	CGGGGGAG
1-GGGGGGAG	STREME-1	transcript_PVP01_0719700.1	1867	1874	.	8.82	CGGGGGAG
1-GGGGGGAG	STREME-1	transcript_PVP01_0719700.1	5819	5826	.	8.82	CGGGGGAG
1-GGGGGGAG	STREME-1	transcript_PVP01_0719700.1	6702	6709	.	8.82	CGGGGGAG
1-GGGGGGAG	STREME-1	transcript_PVP01_0940400.1	459	466	.	8.82	CGGGGGAG
1-GGGGGGAG	STREME-1	transcript_PVP01_0215100.1	115	122	.	8.82	CGGGGGAG
1-GGGGGGAG	STREME-1	transcript_PVP01_0837600.1	2115	2122	.	8.82	CGGGGGAG
1-GGGGGGAG	STREME-1	transcript_PVP01_1452500.1	2175	2182	.	8.82	CGGGGGAG
1-GGGGGGAG	STREME-1	transcript_PVP01_0911800.1	1427	1434	.	8.82	CGGGGGAG
1-GGGGGGAG	STREME-1	transcript_PVP01_0911800.1	1469	1476	.	8.82	CGGGGGAG
1-GGGGGGAG	STREME-1	transcript_PVP01_1012000.1	2066	2073	.	8.82	CGGGGGAG
1-GGGGGGAG	STREME-1	transcript_PVP01_1138600.1	1796	1803	.	8.82	CGGGGGAG
1-GGGGGGAG	STREME-1	transcript_PVP01_1013800.1	3340	3347	.	8.82	CGGGGGAG
1-GGGGGGAG	STREME-1	transcript_PVP01_0725100.1	861	868	.	8.82	CGGGGGAG
1-GGGGGGAG	STREME-1	transcript_PVP01_0725700.1	2673	2680	.	8.82	CGGGGGAG
1-GGGGGGAG	STREME-1	transcript_PVP01_0809200.1	218	225	.	8.82	CGGGGGAG
1-GGGGGGAG	STREME-1	transcript_PVP01_0208100.1	1664	1671	.	8.82	CGGGGGAG
1-GGGGGGAG	STREME-1	transcript_PVP01_0208100.1	2820	2827	.	8.82	CGGGGGAG
1-GGGGGGAG	STREME-1	transcript_PVP01_0208100.1	2850	2857	.	8.82	CGGGGGAG
1-GGGGGGAG	STREME-1	transcript_PVP01_0208100.1	2880	2887	.	8.82	CGGGGGAG
1-GGGGGGAG	STREME-1	transcript_PVP01_1457200.1	210	217	.	8.82	CGGGGGAG
1-GGGGGGAG	STREME-1	transcript_PVP01_0611400.1	267	274	.	8.82	CGGGGGAG
1-GGGGGGAG	STREME-1	transcript_PVP01_1131600.1	2194	2201	.	8.82	CGGGGGAG
1-GGGGGGAG	STREME-1	transcript_PVP01_1462300.1	3341	3348	.	8.82	CGGGGGAG
1-GGGGGGAG	STREME-1	transcript_PVP01_0941200.1	2988	2995	.	8.82	CGGGGGAG
1-GGGGGGAG	STREME-1	transcript_PVP01_1467700.1	1999	2006	.	8.82	CGGGGGAG
1-GGGGGGAG	STREME-1	transcript_PVP01_1405500.1	1691	1698	.	8.82	CGGGGGAG
1-GGGGGGAG	STREME-1	transcript_PVP01_1003200.1	1008	1015	.	8.82	CGGGGGAG
1-GGGGGGAG	STREME-1	transcript_PVP01_1465500.1	694	701	.	8.82	CGGGGGAG
1-GGGGGGAG	STREME-1	transcript_PVP01_1341700.1	1982	1989	.	8.82	CGGGGGAG
1-GGGGGGAG	STREME-1	transcript_PVP01_0938900.1	143	150	.	8.82	CGGGGGAG
1-GGGGGGAG	STREME-1	transcript_PVP01_0938900.1	1395	1402	.	8.82	CGGGGGAG
1-GGGGGGAG	STREME-1	transcript_PVP01_1326600.1	1776	1783	.	8.82	CGGGGGAG
1-GGGGGGAG	STREME-1	transcript_PVP01_0116800.1	2852	2859	.	8.82	CGGGGGAG
1-GGGGGGAG	STREME-1	transcript_PVP01_0108500.1	1822	1829	.	8.82	CGGGGGAG
1-GGGGGGAG	STREME-1	transcript_PVP01_0108500.1	2738	2745	.	8.82	CGGGGGAG
1-GGGGGGAG	STREME-1	transcript_PVP01_0944300.1	810	817	.	8.82	CGGGGGAG
1-GGGGGGAG	STREME-1	transcript_PVP01_0927100.1	1403	1410	.	8.82	CGGGGGAG
1-GGGGGGAG	STREME-1	transcript_PVP01_1270300.1	8400	8407	.	8.75	GUGGGGAG
1-GGGGGGAG	STREME-1	transcript_PVP01_1132100.1	3088	3095	.	8.75	GUGGGGAG
1-GGGGGGAG	STREME-1	transcript_PVP01_0508300.1	3693	3700	.	8.75	GUGGGGAG
1-GGGGGGAG	STREME-1	transcript_PVP01_0713700.1	887	894	.	8.75	GUGGGGAG
1-GGGGGGAG	STREME-1	transcript_PVP01_1429000.1	4557	4564	.	8.75	GUGGGGAG
1-GGGGGGAG	STREME-1	transcript_PVP01_1415200.1	423	430	.	8.75	GUGGGGAG
1-GGGGGGAG	STREME-1	transcript_PVP01_1233000.1	2782	2789	.	8.75	GUGGGGAG
1-GGGGGGAG	STREME-1	transcript_PVP01_0520900.1	973	980	.	8.75	GUGGGGAG
1-GGGGGGAG	STREME-1	transcript_PVP01_0945200.1	957	964	.	8.75	GUGGGGAG
1-GGGGGGAG	STREME-1	transcript_PVP01_1264800.1	2276	2283	.	8.75	GUGGGGAG
1-GGGGGGAG	STREME-1	transcript_PVP01_1241000.1	5766	5773	.	8.75	GUGGGGAG
1-GGGGGGAG	STREME-1	transcript_PVP01_1241000.1	9211	9218	.	8.75	GUGGGGAG
1-GGGGGGAG	STREME-1	transcript_PVP01_1262900.1	19160	19167	.	8.75	GUGGGGAG
1-GGGGGGAG	STREME-1	transcript_PVP01_0212900.1	2690	2697	.	8.75	GUGGGGAG
1-GGGGGGAG	STREME-1	transcript_PVP01_0836200.1	1844	1851	.	8.75	GUGGGGAG
1-GGGGGGAG	STREME-1	transcript_PVP01_0726600.1	2366	2373	.	8.75	GUGGGGAG
1-GGGGGGAG	STREME-1	transcript_PVP01_1225900.1	2428	2435	.	8.75	GUGGGGAG
1-GGGGGGAG	STREME-1	transcript_PVP01_0527000.1	2133	2140	.	8.75	GUGGGGAG
1-GGGGGGAG	STREME-1	transcript_PVP01_1253100.1	2409	2416	.	8.75	GUGGGGAG
1-GGGGGGAG	STREME-1	transcript_PVP01_1020600.1	220	227	.	8.75	GUGGGGAG
1-GGGGGGAG	STREME-1	transcript_PVP01_1307300.1	7184	7191	.	8.75	GUGGGGAG
1-GGGGGGAG	STREME-1	transcript_PVP01_1020200.1	4537	4544	.	8.75	GUGGGGAG
1-GGGGGGAG	STREME-1	transcript_PVP01_1411500.1	2126	2133	.	8.75	GUGGGGAG
1-GGGGGGAG	STREME-1	transcript_PVP01_0813200.1	1639	1646	.	8.75	GUGGGGAG
1-GGGGGGAG	STREME-1	transcript_PVP01_1237100.1	879	886	.	8.75	GUGGGGAG
1-GGGGGGAG	STREME-1	transcript_PVP01_1329800.1	2031	2038	.	8.75	GUGGGGAG
1-GGGGGGAG	STREME-1	transcript_PVP01_1107500.1	2341	2348	.	8.75	GUGGGGAG
1-GGGGGGAG	STREME-1	transcript_PVP01_1107200.1	68	75	.	8.75	GUGGGGAG
1-GGGGGGAG	STREME-1	transcript_PVP01_1457700.1	28	35	.	8.75	GUGGGGAG
1-GGGGGGAG	STREME-1	transcript_PVP01_1405700.1	2981	2988	.	8.75	GUGGGGAG
1-GGGGGGAG	STREME-1	transcript_PVP01_1405700.1	4832	4839	.	8.75	GUGGGGAG
1-GGGGGGAG	STREME-1	transcript_PVP01_0834400.1	2046	2053	.	8.75	GUGGGGAG
1-GGGGGGAG	STREME-1	transcript_PVP01_0927500.1	6183	6190	.	8.75	GUGGGGAG
1-GGGGGGAG	STREME-1	transcript_PVP01_1117300.1	3081	3088	.	8.75	GUGGGGAG
1-GGGGGGAG	STREME-1	transcript_PVP01_1103200.1	1723	1730	.	8.75	GUGGGGAG
1-GGGGGGAG	STREME-1	transcript_PVP01_1103200.1	2945	2952	.	8.75	GUGGGGAG
1-GGGGGGAG	STREME-1	transcript_PVP01_0912000.1	252	259	.	8.75	GUGGGGAG
1-GGGGGGAG	STREME-1	transcript_PVP01_0912000.1	1412	1419	.	8.75	GUGGGGAG
1-GGGGGGAG	STREME-1	transcript_PVP01_0405900.1	1383	1390	.	8.75	GUGGGGAG
1-GGGGGGAG	STREME-1	transcript_PVP01_1314800.1	207	214	.	8.75	GUGGGGAG
1-GGGGGGAG	STREME-1	transcript_PVP01_0832300.1	3795	3802	.	8.75	GUGGGGAG
1-GGGGGGAG	STREME-1	transcript_PVP01_1111400.1	186	193	.	8.75	GUGGGGAG
1-GGGGGGAG	STREME-1	transcript_PVP01_0210000.1	728	735	.	8.75	GUGGGGAG
1-GGGGGGAG	STREME-1	transcript_PVP01_1236700.1	4599	4606	.	8.75	GUGGGGAG
1-GGGGGGAG	STREME-1	transcript_PVP01_1236700.1	4875	4882	.	8.75	GUGGGGAG
1-GGGGGGAG	STREME-1	transcript_PVP01_0515100.1	1891	1898	.	8.75	GUGGGGAG
1-GGGGGGAG	STREME-1	transcript_PVP01_1238800.1	3482	3489	.	8.75	GUGGGGAG
1-GGGGGGAG	STREME-1	transcript_PVP01_1109000.1	1343	1350	.	8.75	GUGGGGAG
1-GGGGGGAG	STREME-1	transcript_PVP01_1109000.1	1376	1383	.	8.75	GUGGGGAG
1-GGGGGGAG	STREME-1	transcript_PVP01_1247800.1	176	183	.	8.75	GUGGGGAG
1-GGGGGGAG	STREME-1	transcript_PVP01_1266500.1	504	511	.	8.75	GUGGGGAG
1-GGGGGGAG	STREME-1	transcript_PVP01_1265300.1	1023	1030	.	8.75	GUGGGGAG
1-GGGGGGAG	STREME-1	transcript_PVP01_1117000.1	2825	2832	.	8.75	GUGGGGAG
1-GGGGGGAG	STREME-1	transcript_PVP01_1143200.1	2812	2819	.	8.75	GUGGGGAG
1-GGGGGGAG	STREME-1	transcript_PVP01_1143200.1	3294	3301	.	8.75	GUGGGGAG
1-GGGGGGAG	STREME-1	transcript_PVP01_1232200.1	2256	2263	.	8.75	GUGGGGAG
1-GGGGGGAG	STREME-1	transcript_PVP01_1120800.1	2314	2321	.	8.75	GUGGGGAG
1-GGGGGGAG	STREME-1	transcript_PVP01_1214000.1	933	940	.	8.75	GUGGGGAG
1-GGGGGGAG	STREME-1	transcript_PVP01_1234900.1	4816	4823	.	8.75	GUGGGGAG
1-GGGGGGAG	STREME-1	transcript_PVP01_1120600.1	2402	2409	.	8.75	GUGGGGAG
1-GGGGGGAG	STREME-1	transcript_PVP01_0725100.1	2538	2545	.	8.75	GUGGGGAG
1-GGGGGGAG	STREME-1	transcript_PVP01_0725700.1	2571	2578	.	8.75	GUGGGGAG
1-GGGGGGAG	STREME-1	transcript_PVP01_0207300.1	8575	8582	.	8.75	GUGGGGAG
1-GGGGGGAG	STREME-1	transcript_PVP01_0916200.1	2090	2097	.	8.75	GUGGGGAG
1-GGGGGGAG	STREME-1	transcript_PVP01_0916200.1	2102	2109	.	8.75	GUGGGGAG
1-GGGGGGAG	STREME-1	transcript_PVP01_0614600.1	2095	2102	.	8.75	GUGGGGAG
1-GGGGGGAG	STREME-1	transcript_PVP01_0611400.1	1261	1268	.	8.75	GUGGGGAG
1-GGGGGGAG	STREME-1	transcript_PVP01_0611400.1	1300	1307	.	8.75	GUGGGGAG
1-GGGGGGAG	STREME-1	transcript_PVP01_1215200.1	1085	1092	.	8.75	GUGGGGAG
1-GGGGGGAG	STREME-1	transcript_PVP01_1215200.1	2642	2649	.	8.75	GUGGGGAG
1-GGGGGGAG	STREME-1	transcript_PVP01_0812600.1	2712	2719	.	8.75	GUGGGGAG
1-GGGGGGAG	STREME-1	transcript_PVP01_1142100.1	1916	1923	.	8.75	GUGGGGAG
1-GGGGGGAG	STREME-1	transcript_PVP01_1408200.1	2474	2481	.	8.75	GUGGGGAG
1-GGGGGGAG	STREME-1	transcript_PVP01_0705800.1	1139	1146	.	8.75	GUGGGGAG
1-GGGGGGAG	STREME-1	transcript_PVP01_0938900.1	2743	2750	.	8.75	GUGGGGAG
1-GGGGGGAG	STREME-1	transcript_PVP01_0807500.1	2442	2449	.	8.75	GUGGGGAG
1-GGGGGGAG	STREME-1	transcript_PVP01_1117200.1	1307	1314	.	8.75	GUGGGGAG
1-GGGGGGAG	STREME-1	transcript_PVP01_0508300.1	3478	3485	.	8.75	GGGGGGUG
1-GGGGGGAG	STREME-1	transcript_PVP01_1449100.1	326	333	.	8.75	GGGGGGUG
1-GGGGGGAG	STREME-1	transcript_PVP01_1442800.1	3490	3497	.	8.75	GGGGGGUG
1-GGGGGGAG	STREME-1	transcript_PVP01_0412900.1	1948	1955	.	8.75	GGGGGGUG
1-GGGGGGAG	STREME-1	transcript_PVP01_0923500.1	107	114	.	8.75	GGGGGGUG
1-GGGGGGAG	STREME-1	transcript_PVP01_0940100.1	5536	5543	.	8.75	GGGGGGUG
1-GGGGGGAG	STREME-1	transcript_PVP01_1012800.1	559	566	.	8.75	GGGGGGUG
1-GGGGGGAG	STREME-1	transcript_PVP01_1133200.1	3212	3219	.	8.75	GGGGGGUG
1-GGGGGGAG	STREME-1	transcript_PVP01_0207900.1	1155	1162	.	8.75	GGGGGGUG
1-GGGGGGAG	STREME-1	transcript_PVP01_1233000.1	3102	3109	.	8.75	GGGGGGUG
1-GGGGGGAG	STREME-1	transcript_PVP01_0214900.1	716	723	.	8.75	GGGGGGUG
1-GGGGGGAG	STREME-1	transcript_PVP01_0214900.1	1006	1013	.	8.75	GGGGGGUG
1-GGGGGGAG	STREME-1	transcript_PVP01_0718800.1	2667	2674	.	8.75	GGGGGGUG
1-GGGGGGAG	STREME-1	transcript_PVP01_0718800.1	5819	5826	.	8.75	GGGGGGUG
1-GGGGGGAG	STREME-1	transcript_PVP01_1446300.1	284	291	.	8.75	GGGGGGUG
1-GGGGGGAG	STREME-1	transcript_PVP01_1214300.1	751	758	.	8.75	GGGGGGUG
1-GGGGGGAG	STREME-1	transcript_PVP01_0509900.1	1970	1977	.	8.75	GGGGGGUG
1-GGGGGGAG	STREME-1	transcript_PVP01_1268500.1	2840	2847	.	8.75	GGGGGGUG
1-GGGGGGAG	STREME-1	transcript_PVP01_1268500.1	3181	3188	.	8.75	GGGGGGUG
1-GGGGGGAG	STREME-1	transcript_PVP01_1239600.1	3524	3531	.	8.75	GGGGGGUG
1-GGGGGGAG	STREME-1	transcript_PVP01_1140300.1	1903	1910	.	8.75	GGGGGGUG
1-GGGGGGAG	STREME-1	transcript_PVP01_1241000.1	5852	5859	.	8.75	GGGGGGUG
1-GGGGGGAG	STREME-1	transcript_PVP01_0409000.1	1485	1492	.	8.75	GGGGGGUG
1-GGGGGGAG	STREME-1	transcript_PVP01_0212900.1	789	796	.	8.75	GGGGGGUG
1-GGGGGGAG	STREME-1	transcript_PVP01_0212900.1	2877	2884	.	8.75	GGGGGGUG
1-GGGGGGAG	STREME-1	transcript_PVP01_0836200.1	2457	2464	.	8.75	GGGGGGUG
1-GGGGGGAG	STREME-1	transcript_PVP01_1426600.1	2381	2388	.	8.75	GGGGGGUG
1-GGGGGGAG	STREME-1	transcript_PVP01_0205800.1	1895	1902	.	8.75	GGGGGGUG
1-GGGGGGAG	STREME-1	transcript_PVP01_1340800.1	3306	3313	.	8.75	GGGGGGUG
1-GGGGGGAG	STREME-1	transcript_PVP01_0411300.1	4632	4639	.	8.75	GGGGGGUG
1-GGGGGGAG	STREME-1	transcript_PVP01_1318200.1	1812	1819	.	8.75	GGGGGGUG
1-GGGGGGAG	STREME-1	transcript_PVP01_0805400.1	3827	3834	.	8.75	GGGGGGUG
1-GGGGGGAG	STREME-1	transcript_PVP01_0819700.1	732	739	.	8.75	GGGGGGUG
1-GGGGGGAG	STREME-1	transcript_PVP01_1407400.1	2259	2266	.	8.75	GGGGGGUG
1-GGGGGGAG	STREME-1	transcript_PVP01_1020600.1	86	93	.	8.75	GGGGGGUG
1-GGGGGGAG	STREME-1	transcript_PVP01_0810500.1	1741	1748	.	8.75	GGGGGGUG
1-GGGGGGAG	STREME-1	transcript_PVP01_0944400.1	611	618	.	8.75	GGGGGGUG
1-GGGGGGAG	STREME-1	transcript_PVP01_0944400.1	2705	2712	.	8.75	GGGGGGUG
1-GGGGGGAG	STREME-1	transcript_PVP01_0803500.1	5736	5743	.	8.75	GGGGGGUG
1-GGGGGGAG	STREME-1	transcript_PVP01_1118200.1	2201	2208	.	8.75	GGGGGGUG
1-GGGGGGAG	STREME-1	transcript_PVP01_0813200.1	1002	1009	.	8.75	GGGGGGUG
1-GGGGGGAG	STREME-1	transcript_PVP01_1011000.1	5021	5028	.	8.75	GGGGGGUG
1-GGGGGGAG	STREME-1	transcript_PVP01_1269100.1	1582	1589	.	8.75	GGGGGGUG
1-GGGGGGAG	STREME-1	transcript_PVP01_1033300.1	3553	3560	.	8.75	GGGGGGUG
1-GGGGGGAG	STREME-1	transcript_PVP01_1446700.1	1344	1351	.	8.75	GGGGGGUG
1-GGGGGGAG	STREME-1	transcript_PVP01_0505700.1	952	959	.	8.75	GGGGGGUG
1-GGGGGGAG	STREME-1	transcript_PVP01_0923200.1	1568	1575	.	8.75	GGGGGGUG
1-GGGGGGAG	STREME-1	transcript_PVP01_0512700.1	202	209	.	8.75	GGGGGGUG
1-GGGGGGAG	STREME-1	transcript_PVP01_0922300.1	3903	3910	.	8.75	GGGGGGUG
1-GGGGGGAG	STREME-1	transcript_PVP01_1435100.1	264	271	.	8.75	GGGGGGUG
1-GGGGGGAG	STREME-1	transcript_PVP01_1227200.1	2170	2177	.	8.75	GGGGGGUG
1-GGGGGGAG	STREME-1	transcript_PVP01_0927500.1	6543	6550	.	8.75	GGGGGGUG
1-GGGGGGAG	STREME-1	transcript_PVP01_1015200.1	157	164	.	8.75	GGGGGGUG
1-GGGGGGAG	STREME-1	transcript_PVP01_1341100.1	1296	1303	.	8.75	GGGGGGUG
1-GGGGGGAG	STREME-1	transcript_PVP01_1341100.1	3828	3835	.	8.75	GGGGGGUG
1-GGGGGGAG	STREME-1	transcript_PVP01_0705200.1	1564	1571	.	8.75	GGGGGGUG
1-GGGGGGAG	STREME-1	transcript_PVP01_0507200.1	29	36	.	8.75	GGGGGGUG
1-GGGGGGAG	STREME-1	transcript_PVP01_0507200.1	381	388	.	8.75	GGGGGGUG
1-GGGGGGAG	STREME-1	transcript_PVP01_1304200.1	1096	1103	.	8.75	GGGGGGUG
1-GGGGGGAG	STREME-1	transcript_PVP01_1304200.1	1783	1790	.	8.75	GGGGGGUG
1-GGGGGGAG	STREME-1	transcript_PVP01_0830300.1	3515	3522	.	8.75	GGGGGGUG
1-GGGGGGAG	STREME-1	transcript_PVP01_0832300.1	4516	4523	.	8.75	GGGGGGUG
1-GGGGGGAG	STREME-1	transcript_PVP01_0832300.1	7598	7605	.	8.75	GGGGGGUG
1-GGGGGGAG	STREME-1	transcript_PVP01_0212600.1	2732	2739	.	8.75	GGGGGGUG
1-GGGGGGAG	STREME-1	transcript_PVP01_0614700.1	2431	2438	.	8.75	GGGGGGUG
1-GGGGGGAG	STREME-1	transcript_PVP01_1339800.1	1066	1073	.	8.75	GGGGGGUG
1-GGGGGGAG	STREME-1	transcript_PVP01_0617700.1	358	365	.	8.75	GGGGGGUG
1-GGGGGGAG	STREME-1	transcript_PVP01_0917800.1	2637	2644	.	8.75	GGGGGGUG
1-GGGGGGAG	STREME-1	transcript_PVP01_0820400.1	873	880	.	8.75	GGGGGGUG
1-GGGGGGAG	STREME-1	transcript_PVP01_0937500.1	676	683	.	8.75	GGGGGGUG
1-GGGGGGAG	STREME-1	transcript_PVP01_0937500.1	5058	5065	.	8.75	GGGGGGUG
1-GGGGGGAG	STREME-1	transcript_PVP01_1236700.1	4509	4516	.	8.75	GGGGGGUG
1-GGGGGGAG	STREME-1	transcript_PVP01_0312400.1	1756	1763	.	8.75	GGGGGGUG
1-GGGGGGAG	STREME-1	transcript_PVP01_1140700.1	440	447	.	8.75	GGGGGGUG
1-GGGGGGAG	STREME-1	transcript_PVP01_0103600.1	2480	2487	.	8.75	GGGGGGUG
1-GGGGGGAG	STREME-1	transcript_PVP01_0517000.1	425	432	.	8.75	GGGGGGUG
1-GGGGGGAG	STREME-1	transcript_PVP01_0517000.1	910	917	.	8.75	GGGGGGUG
1-GGGGGGAG	STREME-1	transcript_PVP01_0517000.1	1377	1384	.	8.75	GGGGGGUG
1-GGGGGGAG	STREME-1	transcript_PVP01_1112600.1	3409	3416	.	8.75	GGGGGGUG
1-GGGGGGAG	STREME-1	transcript_PVP01_1112600.1	3875	3882	.	8.75	GGGGGGUG
1-GGGGGGAG	STREME-1	transcript_PVP01_0114500.1	1160	1167	.	8.75	GGGGGGUG
1-GGGGGGAG	STREME-1	transcript_PVP01_1256400.1	2526	2533	.	8.75	GGGGGGUG
1-GGGGGGAG	STREME-1	transcript_PVP01_1462400.1	731	738	.	8.75	GGGGGGUG
1-GGGGGGAG	STREME-1	transcript_PVP01_1331400.1	2385	2392	.	8.75	GGGGGGUG
1-GGGGGGAG	STREME-1	transcript_PVP01_0921200.1	2662	2669	.	8.75	GGGGGGUG
1-GGGGGGAG	STREME-1	transcript_PVP01_0320800.1	1775	1782	.	8.75	GGGGGGUG
1-GGGGGGAG	STREME-1	transcript_PVP01_0930600.1	862	869	.	8.75	GGGGGGUG
1-GGGGGGAG	STREME-1	transcript_PVP01_1455200.1	2883	2890	.	8.75	GGGGGGUG
1-GGGGGGAG	STREME-1	transcript_PVP01_1021100.1	818	825	.	8.75	GGGGGGUG
1-GGGGGGAG	STREME-1	transcript_PVP01_0714600.1	2151	2158	.	8.75	GGGGGGUG
1-GGGGGGAG	STREME-1	transcript_PVP01_0313800.1	2014	2021	.	8.75	GGGGGGUG
1-GGGGGGAG	STREME-1	transcript_PVP01_0722700.1	1131	1138	.	8.75	GGGGGGUG
1-GGGGGGAG	STREME-1	transcript_PVP01_1323000.1	238	245	.	8.75	GGGGGGUG
1-GGGGGGAG	STREME-1	transcript_PVP01_0728800.1	5106	5113	.	8.75	GGGGGGUG
1-GGGGGGAG	STREME-1	transcript_PVP01_0728800.1	5404	5411	.	8.75	GGGGGGUG
1-GGGGGGAG	STREME-1	transcript_PVP01_1308600.1	3855	3862	.	8.75	GGGGGGUG
1-GGGGGGAG	STREME-1	transcript_PVP01_0911800.1	1253	1260	.	8.75	GGGGGGUG
1-GGGGGGAG	STREME-1	transcript_PVP01_1204100.1	1802	1809	.	8.75	GGGGGGUG
1-GGGGGGAG	STREME-1	transcript_PVP01_0725100.1	2831	2838	.	8.75	GGGGGGUG
1-GGGGGGAG	STREME-1	transcript_PVP01_0207300.1	3447	3454	.	8.75	GGGGGGUG
1-GGGGGGAG	STREME-1	transcript_PVP01_0207300.1	9664	9671	.	8.75	GGGGGGUG
1-GGGGGGAG	STREME-1	transcript_PVP01_0908700.1	4904	4911	.	8.75	GGGGGGUG
1-GGGGGGAG	STREME-1	transcript_PVP01_0809200.1	906	913	.	8.75	GGGGGGUG
1-GGGGGGAG	STREME-1	transcript_PVP01_0614600.1	26	33	.	8.75	GGGGGGUG
1-GGGGGGAG	STREME-1	transcript_PVP01_0208100.1	1850	1857	.	8.75	GGGGGGUG
1-GGGGGGAG	STREME-1	transcript_PVP01_1433000.1	2118	2125	.	8.75	GGGGGGUG
1-GGGGGGAG	STREME-1	transcript_PVP01_1142100.1	291	298	.	8.75	GGGGGGUG
1-GGGGGGAG	STREME-1	transcript_PVP01_1425500.1	707	714	.	8.75	GGGGGGUG
1-GGGGGGAG	STREME-1	transcript_PVP01_0306900.1	646	653	.	8.75	GGGGGGUG
1-GGGGGGAG	STREME-1	transcript_PVP01_1145700.1	1274	1281	.	8.75	GGGGGGUG
1-GGGGGGAG	STREME-1	transcript_PVP01_0215600.1	6333	6340	.	8.75	GGGGGGUG
1-GGGGGGAG	STREME-1	transcript_PVP01_1251900.1	2316	2323	.	8.7	GGGGGGCG
1-GGGGGGAG	STREME-1	transcript_PVP01_0719200.1	2879	2886	.	8.7	GGGGGGCG
1-GGGGGGAG	STREME-1	transcript_PVP01_0713700.1	2070	2077	.	8.7	GGGGGGCG
1-GGGGGGAG	STREME-1	transcript_PVP01_1227400.1	1148	1155	.	8.7	GGGGGGCG
1-GGGGGGAG	STREME-1	transcript_PVP01_1450100.1	1032	1039	.	8.7	GGGGGGCG
1-GGGGGGAG	STREME-1	transcript_PVP01_0806100.1	1233	1240	.	8.7	GGGGGGCG
1-GGGGGGAG	STREME-1	transcript_PVP01_1420500.1	3958	3965	.	8.7	GGGGGGCG
1-GGGGGGAG	STREME-1	transcript_PVP01_0207900.1	411	418	.	8.7	GGGGGGCG
1-GGGGGGAG	STREME-1	transcript_PVP01_0834000.1	659	666	.	8.7	GGGGGGCG
1-GGGGGGAG	STREME-1	transcript_PVP01_0710600.1	997	1004	.	8.7	GGGGGGCG
1-GGGGGGAG	STREME-1	transcript_PVP01_1123000.1	383	390	.	8.7	GGGGGGCG
1-GGGGGGAG	STREME-1	transcript_PVP01_0811000.1	775	782	.	8.7	GGGGGGCG
1-GGGGGGAG	STREME-1	transcript_PVP01_0105400.1	3959	3966	.	8.7	GGGGGGCG
1-GGGGGGAG	STREME-1	transcript_PVP01_0509900.1	397	404	.	8.7	GGGGGGCG
1-GGGGGGAG	STREME-1	transcript_PVP01_1241000.1	12566	12573	.	8.7	GGGGGGCG
1-GGGGGGAG	STREME-1	transcript_PVP01_0210800.1	2519	2526	.	8.7	GGGGGGCG
1-GGGGGGAG	STREME-1	transcript_PVP01_1262900.1	1470	1477	.	8.7	GGGGGGCG
1-GGGGGGAG	STREME-1	transcript_PVP01_0409000.1	579	586	.	8.7	GGGGGGCG
1-GGGGGGAG	STREME-1	transcript_PVP01_1425300.1	289	296	.	8.7	GGGGGGCG
1-GGGGGGAG	STREME-1	transcript_PVP01_1216300.1	2140	2147	.	8.7	GGGGGGCG
1-GGGGGGAG	STREME-1	transcript_PVP01_1216300.1	2295	2302	.	8.7	GGGGGGCG
1-GGGGGGAG	STREME-1	transcript_PVP01_1216300.1	2577	2584	.	8.7	GGGGGGCG
1-GGGGGGAG	STREME-1	transcript_PVP01_0726600.1	1191	1198	.	8.7	GGGGGGCG
1-GGGGGGAG	STREME-1	transcript_PVP01_0522600.1	2147	2154	.	8.7	GGGGGGCG
1-GGGGGGAG	STREME-1	transcript_PVP01_1453900.1	2266	2273	.	8.7	GGGGGGCG
1-GGGGGGAG	STREME-1	transcript_PVP01_0211900.1	389	396	.	8.7	GGGGGGCG
1-GGGGGGAG	STREME-1	transcript_PVP01_0211900.1	1058	1065	.	8.7	GGGGGGCG
1-GGGGGGAG	STREME-1	transcript_PVP01_0918900.1	1880	1887	.	8.7	GGGGGGCG
1-GGGGGGAG	STREME-1	transcript_PVP01_1225900.1	887	894	.	8.7	GGGGGGCG
1-GGGGGGAG	STREME-1	transcript_PVP01_1225900.1	1337	1344	.	8.7	GGGGGGCG
1-GGGGGGAG	STREME-1	transcript_PVP01_1263500.1	1057	1064	.	8.7	GGGGGGCG
1-GGGGGGAG	STREME-1	transcript_PVP01_0819700.1	4603	4610	.	8.7	GGGGGGCG
1-GGGGGGAG	STREME-1	transcript_PVP01_1407400.1	7715	7722	.	8.7	GGGGGGCG
1-GGGGGGAG	STREME-1	transcript_PVP01_1246700.1	857	864	.	8.7	GGGGGGCG
1-GGGGGGAG	STREME-1	transcript_PVP01_1020600.1	238	245	.	8.7	GGGGGGCG
1-GGGGGGAG	STREME-1	transcript_PVP01_0527800.1	3446	3453	.	8.7	GGGGGGCG
1-GGGGGGAG	STREME-1	transcript_PVP01_1020200.1	2832	2839	.	8.7	GGGGGGCG
1-GGGGGGAG	STREME-1	transcript_PVP01_0604500.1	2413	2420	.	8.7	GGGGGGCG
1-GGGGGGAG	STREME-1	transcript_PVP01_0933300.1	498	505	.	8.7	GGGGGGCG
1-GGGGGGAG	STREME-1	transcript_PVP01_1329800.1	2865	2872	.	8.7	GGGGGGCG
1-GGGGGGAG	STREME-1	transcript_PVP01_1329800.1	4615	4622	.	8.7	GGGGGGCG
1-GGGGGGAG	STREME-1	transcript_PVP01_0923200.1	6115	6122	.	8.7	GGGGGGCG
1-GGGGGGAG	STREME-1	transcript_PVP01_0614100.1	3374	3381	.	8.7	GGGGGGCG
1-GGGGGGAG	STREME-1	transcript_PVP01_1107200.1	1731	1738	.	8.7	GGGGGGCG
1-GGGGGGAG	STREME-1	transcript_PVP01_1323100.1	774	781	.	8.7	GGGGGGCG
1-GGGGGGAG	STREME-1	transcript_PVP01_0817600.1	4637	4644	.	8.7	GGGGGGCG
1-GGGGGGAG	STREME-1	transcript_PVP01_0834400.1	3641	3648	.	8.7	GGGGGGCG
1-GGGGGGAG	STREME-1	transcript_PVP01_1426200.1	859	866	.	8.7	GGGGGGCG
1-GGGGGGAG	STREME-1	transcript_PVP01_0927500.1	4209	4216	.	8.7	GGGGGGCG
1-GGGGGGAG	STREME-1	transcript_PVP01_1103200.1	1702	1709	.	8.7	GGGGGGCG
1-GGGGGGAG	STREME-1	transcript_PVP01_0506300.1	1082	1089	.	8.7	GGGGGGCG
1-GGGGGGAG	STREME-1	transcript_PVP01_1220800.1	5197	5204	.	8.7	GGGGGGCG
1-GGGGGGAG	STREME-1	transcript_PVP01_1341100.1	2409	2416	.	8.7	GGGGGGCG
1-GGGGGGAG	STREME-1	transcript_PVP01_0939600.1	1005	1012	.	8.7	GGGGGGCG
1-GGGGGGAG	STREME-1	transcript_PVP01_1323700.1	3335	3342	.	8.7	GGGGGGCG
1-GGGGGGAG	STREME-1	transcript_PVP01_0514900.1	748	755	.	8.7	GGGGGGCG
1-GGGGGGAG	STREME-1	transcript_PVP01_0832300.1	1771	1778	.	8.7	GGGGGGCG
1-GGGGGGAG	STREME-1	transcript_PVP01_0832300.1	3130	3137	.	8.7	GGGGGGCG
1-GGGGGGAG	STREME-1	transcript_PVP01_0832300.1	9173	9180	.	8.7	GGGGGGCG
1-GGGGGGAG	STREME-1	transcript_PVP01_0212600.1	2450	2457	.	8.7	GGGGGGCG
1-GGGGGGAG	STREME-1	transcript_PVP01_1459100.1	359	366	.	8.7	GGGGGGCG
1-GGGGGGAG	STREME-1	transcript_PVP01_0708400.1	1117	1124	.	8.7	GGGGGGCG
1-GGGGGGAG	STREME-1	transcript_PVP01_0708400.1	2257	2264	.	8.7	GGGGGGCG
1-GGGGGGAG	STREME-1	transcript_PVP01_1003900.1	1413	1420	.	8.7	GGGGGGCG
1-GGGGGGAG	STREME-1	transcript_PVP01_1109000.1	2788	2795	.	8.7	GGGGGGCG
1-GGGGGGAG	STREME-1	transcript_PVP01_0810700.1	1380	1387	.	8.7	GGGGGGCG
1-GGGGGGAG	STREME-1	transcript_PVP01_1468300.1	1448	1455	.	8.7	GGGGGGCG
1-GGGGGGAG	STREME-1	transcript_PVP01_0921200.1	7368	7375	.	8.7	GGGGGGCG
1-GGGGGGAG	STREME-1	transcript_PVP01_0921200.1	8278	8285	.	8.7	GGGGGGCG
1-GGGGGGAG	STREME-1	transcript_PVP01_1455200.1	52	59	.	8.7	GGGGGGCG
1-GGGGGGAG	STREME-1	transcript_PVP01_0714600.1	3555	3562	.	8.7	GGGGGGCG
1-GGGGGGAG	STREME-1	transcript_PVP01_1428300.1	1395	1402	.	8.7	GGGGGGCG
1-GGGGGGAG	STREME-1	transcript_PVP01_0313800.1	4652	4659	.	8.7	GGGGGGCG
1-GGGGGGAG	STREME-1	transcript_PVP01_0313800.1	8608	8615	.	8.7	GGGGGGCG
1-GGGGGGAG	STREME-1	transcript_PVP01_0719700.1	1744	1751	.	8.7	GGGGGGCG
1-GGGGGGAG	STREME-1	transcript_PVP01_0719700.1	2035	2042	.	8.7	GGGGGGCG
1-GGGGGGAG	STREME-1	transcript_PVP01_0306600.1	519	526	.	8.7	GGGGGGCG
1-GGGGGGAG	STREME-1	transcript_PVP01_0520400.1	2820	2827	.	8.7	GGGGGGCG
1-GGGGGGAG	STREME-1	transcript_PVP01_0409700.1	104	111	.	8.7	GGGGGGCG
1-GGGGGGAG	STREME-1	transcript_PVP01_1120600.1	3109	3116	.	8.7	GGGGGGCG
1-GGGGGGAG	STREME-1	transcript_PVP01_1308600.1	2238	2245	.	8.7	GGGGGGCG
1-GGGGGGAG	STREME-1	transcript_PVP01_1245800.1	927	934	.	8.7	GGGGGGCG
1-GGGGGGAG	STREME-1	transcript_PVP01_1245800.1	957	964	.	8.7	GGGGGGCG
1-GGGGGGAG	STREME-1	transcript_PVP01_0311000.1	304	311	.	8.7	GGGGGGCG
1-GGGGGGAG	STREME-1	transcript_PVP01_0207300.1	1018	1025	.	8.7	GGGGGGCG
1-GGGGGGAG	STREME-1	transcript_PVP01_0908700.1	2597	2604	.	8.7	GGGGGGCG
1-GGGGGGAG	STREME-1	transcript_PVP01_0908700.1	4227	4234	.	8.7	GGGGGGCG
1-GGGGGGAG	STREME-1	transcript_PVP01_1445100.1	3812	3819	.	8.7	GGGGGGCG
1-GGGGGGAG	STREME-1	transcript_PVP01_1213300.1	1483	1490	.	8.7	GGGGGGCG
1-GGGGGGAG	STREME-1	transcript_PVP01_0938900.1	1229	1236	.	8.7	GGGGGGCG
1-GGGGGGAG	STREME-1	transcript_PVP01_0215600.1	3905	3912	.	8.7	GGGGGGCG
1-GGGGGGAG	STREME-1	transcript_PVP01_0704700.1	605	612	.	8.7	GGGGGGCG
1-GGGGGGAG	STREME-1	transcript_PVP01_1212400.1	3261	3268	.	8.7	GGGGGGCG
1-GGGGGGAG	STREME-1	transcript_PVP01_1251900.1	1776	1783	.	8.68	GGAGGGAG
1-GGGGGGAG	STREME-1	transcript_PVP01_1132100.1	537	544	.	8.68	GGAGGGAG
1-GGGGGGAG	STREME-1	transcript_PVP01_1132100.1	1185	1192	.	8.68	GGGAGGAG
1-GGGGGGAG	STREME-1	transcript_PVP01_1132100.1	3091	3098	.	8.68	GGGAGGAG
1-GGGGGGAG	STREME-1	transcript_PVP01_0508300.1	401	408	.	8.68	GGGAGGAG
1-GGGGGGAG	STREME-1	transcript_PVP01_0411700.1	1296	1303	.	8.68	GGGAGGAG
1-GGGGGGAG	STREME-1	transcript_PVP01_0713700.1	890	897	.	8.68	GGGAGGAG
1-GGGGGGAG	STREME-1	transcript_PVP01_0713700.1	1101	1108	.	8.68	GGAGGGAG
1-GGGGGGAG	STREME-1	transcript_PVP01_0609600.1	1125	1132	.	8.68	GGGAGGAG
1-GGGGGGAG	STREME-1	transcript_PVP01_1220900.1	1293	1300	.	8.68	GGAGGGAG
1-GGGGGGAG	STREME-1	transcript_PVP01_1308700.1	1206	1213	.	8.68	GGAGGGAG
1-GGGGGGAG	STREME-1	transcript_PVP01_0806100.1	1126	1133	.	8.68	GGGAGGAG
1-GGGGGGAG	STREME-1	transcript_PVP01_1437400.1	3050	3057	.	8.68	GGAGGGAG
1-GGGGGGAG	STREME-1	transcript_PVP01_1429000.1	2395	2402	.	8.68	GGGAGGAG
1-GGGGGGAG	STREME-1	transcript_PVP01_1429000.1	6966	6973	.	8.68	GGAGGGAG
1-GGGGGGAG	STREME-1	transcript_PVP01_1429000.1	8094	8101	.	8.68	GGGAGGAG
1-GGGGGGAG	STREME-1	transcript_PVP01_1415200.1	426	433	.	8.68	GGGAGGAG
1-GGGGGGAG	STREME-1	transcript_PVP01_0923500.1	7451	7458	.	8.68	GGGAGGAG
1-GGGGGGAG	STREME-1	transcript_PVP01_0923500.1	7658	7665	.	8.68	GGGAGGAG
1-GGGGGGAG	STREME-1	transcript_PVP01_0923500.1	11883	11890	.	8.68	GGAGGGAG
1-GGGGGGAG	STREME-1	transcript_PVP01_0923500.1	11904	11911	.	8.68	GGAGGGAG
1-GGGGGGAG	STREME-1	transcript_PVP01_0923500.1	11925	11932	.	8.68	GGAGGGAG
1-GGGGGGAG	STREME-1	transcript_PVP01_0923500.1	11946	11953	.	8.68	GGAGGGAG
1-GGGGGGAG	STREME-1	transcript_PVP01_0923500.1	12009	12016	.	8.68	GGAGGGAG
1-GGGGGGAG	STREME-1	transcript_PVP01_0923500.1	13424	13431	.	8.68	GGGAGGAG
1-GGGGGGAG	STREME-1	transcript_PVP01_0940100.1	2557	2564	.	8.68	GGGAGGAG
1-GGGGGGAG	STREME-1	transcript_PVP01_0940100.1	3056	3063	.	8.68	GGAGGGAG
1-GGGGGGAG	STREME-1	transcript_PVP01_0709300.1	332	339	.	8.68	GGAGGGAG
1-GGGGGGAG	STREME-1	transcript_PVP01_0709300.1	1466	1473	.	8.68	GGGAGGAG
1-GGGGGGAG	STREME-1	transcript_PVP01_0318700.1	1060	1067	.	8.68	GGGAGGAG
1-GGGGGGAG	STREME-1	transcript_PVP01_1133200.1	636	643	.	8.68	GGAGGGAG
1-GGGGGGAG	STREME-1	transcript_PVP01_1133200.1	639	646	.	8.68	GGGAGGAG
1-GGGGGGAG	STREME-1	transcript_PVP01_0822100.1	929	936	.	8.68	GGGAGGAG
1-GGGGGGAG	STREME-1	transcript_PVP01_1133200.1	2925	2932	.	8.68	GGGAGGAG
1-GGGGGGAG	STREME-1	transcript_PVP01_1455700.1	717	724	.	8.68	GGGAGGAG
1-GGGGGGAG	STREME-1	transcript_PVP01_0834000.1	226	233	.	8.68	GGGAGGAG
1-GGGGGGAG	STREME-1	transcript_PVP01_0909700.1	976	983	.	8.68	GGGAGGAG
1-GGGGGGAG	STREME-1	transcript_PVP01_1233000.1	1257	1264	.	8.68	GGAGGGAG
1-GGGGGGAG	STREME-1	transcript_PVP01_0306400.1	1411	1418	.	8.68	GGGAGGAG
1-GGGGGGAG	STREME-1	transcript_PVP01_1233500.1	2929	2936	.	8.68	GGGAGGAG
1-GGGGGGAG	STREME-1	transcript_PVP01_0718800.1	2609	2616	.	8.68	GGGAGGAG
1-GGGGGGAG	STREME-1	transcript_PVP01_0718800.1	5621	5628	.	8.68	GGGAGGAG
1-GGGGGGAG	STREME-1	transcript_PVP01_0612000.1	1165	1172	.	8.68	GGGAGGAG
1-GGGGGGAG	STREME-1	transcript_PVP01_1214300.1	854	861	.	8.68	GGGAGGAG
1-GGGGGGAG	STREME-1	transcript_PVP01_1214300.1	2277	2284	.	8.68	GGGAGGAG
1-GGGGGGAG	STREME-1	transcript_PVP01_1210800.1	909	916	.	8.68	GGAGGGAG
1-GGGGGGAG	STREME-1	transcript_PVP01_1210800.1	1532	1539	.	8.68	GGAGGGAG
1-GGGGGGAG	STREME-1	transcript_PVP01_1223500.1	3081	3088	.	8.68	GGGAGGAG
1-GGGGGGAG	STREME-1	transcript_PVP01_0105400.1	1248	1255	.	8.68	GGGAGGAG
1-GGGGGGAG	STREME-1	transcript_PVP01_1268500.1	385	392	.	8.68	GGAGGGAG
1-GGGGGGAG	STREME-1	transcript_PVP01_1264800.1	1425	1432	.	8.68	GGAGGGAG
1-GGGGGGAG	STREME-1	transcript_PVP01_0527100.1	1687	1694	.	8.68	GGGAGGAG
1-GGGGGGAG	STREME-1	transcript_PVP01_0311700.1	1586	1593	.	8.68	GGGAGGAG
1-GGGGGGAG	STREME-1	transcript_PVP01_1309700.1	10	17	.	8.68	GGGAGGAG
1-GGGGGGAG	STREME-1	transcript_PVP01_0810000.1	923	930	.	8.68	GGAGGGAG
1-GGGGGGAG	STREME-1	transcript_PVP01_1437700.1	2568	2575	.	8.68	GGAGGGAG
1-GGGGGGAG	STREME-1	transcript_PVP01_0939900.1	457	464	.	8.68	GGGAGGAG
1-GGGGGGAG	STREME-1	transcript_PVP01_0835900.1	274	281	.	8.68	GGGAGGAG
1-GGGGGGAG	STREME-1	transcript_PVP01_1443200.1	2557	2564	.	8.68	GGGAGGAG
1-GGGGGGAG	STREME-1	transcript_PVP01_1262900.1	5382	5389	.	8.68	GGAGGGAG
1-GGGGGGAG	STREME-1	transcript_PVP01_1262900.1	15673	15680	.	8.68	GGAGGGAG
1-GGGGGGAG	STREME-1	transcript_PVP01_1262900.1	18717	18724	.	8.68	GGGAGGAG
1-GGGGGGAG	STREME-1	transcript_PVP01_0409000.1	1292	1299	.	8.68	GGGAGGAG
1-GGGGGGAG	STREME-1	transcript_PVP01_0409000.1	1296	1303	.	8.68	GGAGGGAG
1-GGGGGGAG	STREME-1	transcript_PVP01_0212900.1	1880	1887	.	8.68	GGAGGGAG
1-GGGGGGAG	STREME-1	transcript_PVP01_0726600.1	465	472	.	8.68	GGAGGGAG
1-GGGGGGAG	STREME-1	transcript_PVP01_0726600.1	624	631	.	8.68	GGAGGGAG
1-GGGGGGAG	STREME-1	transcript_PVP01_1426600.1	2398	2405	.	8.68	GGAGGGAG
1-GGGGGGAG	STREME-1	transcript_PVP01_0623100.1	2020	2027	.	8.68	GGAGGGAG
1-GGGGGGAG	STREME-1	transcript_PVP01_0623100.1	2077	2084	.	8.68	GGAGGGAG
1-GGGGGGAG	STREME-1	transcript_PVP01_0205800.1	1975	1982	.	8.68	GGAGGGAG
1-GGGGGGAG	STREME-1	transcript_PVP01_0522600.1	2393	2400	.	8.68	GGGAGGAG
1-GGGGGGAG	STREME-1	transcript_PVP01_1438500.1	1539	1546	.	8.68	GGAGGGAG
1-GGGGGGAG	STREME-1	transcript_PVP01_1453900.1	2415	2422	.	8.68	GGGAGGAG
1-GGGGGGAG	STREME-1	transcript_PVP01_0934800.1	2315	2322	.	8.68	GGGAGGAG
1-GGGGGGAG	STREME-1	transcript_PVP01_1318200.1	2596	2603	.	8.68	GGGAGGAG
1-GGGGGGAG	STREME-1	transcript_PVP01_0211900.1	451	458	.	8.68	GGGAGGAG
1-GGGGGGAG	STREME-1	transcript_PVP01_0918900.1	3912	3919	.	8.68	GGAGGGAG
1-GGGGGGAG	STREME-1	transcript_PVP01_1220500.1	2385	2392	.	8.68	GGGAGGAG
1-GGGGGGAG	STREME-1	transcript_PVP01_1442600.1	976	983	.	8.68	GGAGGGAG
1-GGGGGGAG	STREME-1	transcript_PVP01_1442600.1	979	986	.	8.68	GGGAGGAG
1-GGGGGGAG	STREME-1	transcript_PVP01_1442600.1	1305	1312	.	8.68	GGGAGGAG
1-GGGGGGAG	STREME-1	transcript_PVP01_0819700.1	3654	3661	.	8.68	GGGAGGAG
1-GGGGGGAG	STREME-1	transcript_PVP01_1407400.1	134	141	.	8.68	GGGAGGAG
1-GGGGGGAG	STREME-1	transcript_PVP01_1407400.1	7178	7185	.	8.68	GGAGGGAG
1-GGGGGGAG	STREME-1	transcript_PVP01_1407400.1	9311	9318	.	8.68	GGGAGGAG
1-GGGGGGAG	STREME-1	transcript_PVP01_1419900.1	1780	1787	.	8.68	GGAGGGAG
1-GGGGGGAG	STREME-1	transcript_PVP01_0527000.1	2160	2167	.	8.68	GGGAGGAG
1-GGGGGGAG	STREME-1	transcript_PVP01_0527000.1	2186	2193	.	8.68	GGGAGGAG
1-GGGGGGAG	STREME-1	transcript_PVP01_0527000.1	3712	3719	.	8.68	GGGAGGAG
1-GGGGGGAG	STREME-1	transcript_PVP01_1307300.1	614	621	.	8.68	GGGAGGAG
1-GGGGGGAG	STREME-1	transcript_PVP01_1301800.1	3240	3247	.	8.68	GGAGGGAG
1-GGGGGGAG	STREME-1	transcript_PVP01_1108700.1	744	751	.	8.68	GGGAGGAG
1-GGGGGGAG	STREME-1	transcript_PVP01_1413400.1	2175	2182	.	8.68	GGGAGGAG
1-GGGGGGAG	STREME-1	transcript_PVP01_1222600.1	857	864	.	8.68	GGGAGGAG
1-GGGGGGAG	STREME-1	transcript_PVP01_0829200.1	931	938	.	8.68	GGAGGGAG
1-GGGGGGAG	STREME-1	transcript_PVP01_0828600.1	2044	2051	.	8.68	GGGAGGAG
1-GGGGGGAG	STREME-1	transcript_PVP01_0803500.1	4196	4203	.	8.68	GGAGGGAG
1-GGGGGGAG	STREME-1	transcript_PVP01_1411500.1	1873	1880	.	8.68	GGGAGGAG
1-GGGGGGAG	STREME-1	transcript_PVP01_1011000.1	9444	9451	.	8.68	GGGAGGAG
1-GGGGGGAG	STREME-1	transcript_PVP01_0727000.1	867	874	.	8.68	GGAGGGAG
1-GGGGGGAG	STREME-1	transcript_PVP01_0604500.1	892	899	.	8.68	GGGAGGAG
1-GGGGGGAG	STREME-1	transcript_PVP01_0604500.1	2679	2686	.	8.68	GGGAGGAG
1-GGGGGGAG	STREME-1	transcript_PVP01_0604500.1	3828	3835	.	8.68	GGGAGGAG
1-GGGGGGAG	STREME-1	transcript_PVP01_0727800.1	1854	1861	.	8.68	GGAGGGAG
1-GGGGGGAG	STREME-1	transcript_PVP01_0933300.1	3702	3709	.	8.68	GGGAGGAG
1-GGGGGGAG	STREME-1	transcript_PVP01_1269100.1	10208	10215	.	8.68	GGGAGGAG
1-GGGGGGAG	STREME-1	transcript_PVP01_1033300.1	3568	3575	.	8.68	GGGAGGAG
1-GGGGGGAG	STREME-1	transcript_PVP01_1329800.1	3798	3805	.	8.68	GGAGGGAG
1-GGGGGGAG	STREME-1	transcript_PVP01_1329800.1	4273	4280	.	8.68	GGAGGGAG
1-GGGGGGAG	STREME-1	transcript_PVP01_0505700.1	65	72	.	8.68	GGGAGGAG
1-GGGGGGAG	STREME-1	transcript_PVP01_0505700.1	3776	3783	.	8.68	GGGAGGAG
1-GGGGGGAG	STREME-1	transcript_PVP01_0505700.1	3800	3807	.	8.68	GGGAGGAG
1-GGGGGGAG	STREME-1	transcript_PVP01_0505700.1	4651	4658	.	8.68	GGGAGGAG
1-GGGGGGAG	STREME-1	transcript_PVP01_0923200.1	1588	1595	.	8.68	GGAGGGAG
1-GGGGGGAG	STREME-1	transcript_PVP01_1435100.1	2384	2391	.	8.68	GGGAGGAG
1-GGGGGGAG	STREME-1	transcript_PVP01_1011200.1	260	267	.	8.68	GGAGGGAG
1-GGGGGGAG	STREME-1	transcript_PVP01_1420200.1	745	752	.	8.68	GGGAGGAG
1-GGGGGGAG	STREME-1	transcript_PVP01_0010970.1	759	766	.	8.68	GGAGGGAG
1-GGGGGGAG	STREME-1	transcript_PVP01_0010970.1	804	811	.	8.68	GGAGGGAG
1-GGGGGGAG	STREME-1	transcript_PVP01_0732400.1	443	450	.	8.68	GGAGGGAG
1-GGGGGGAG	STREME-1	transcript_PVP01_1323100.1	1349	1356	.	8.68	GGAGGGAG
1-GGGGGGAG	STREME-1	transcript_PVP01_0817600.1	2368	2375	.	8.68	GGAGGGAG
1-GGGGGGAG	STREME-1	transcript_PVP01_0834400.1	961	968	.	8.68	GGGAGGAG
1-GGGGGGAG	STREME-1	transcript_PVP01_0834400.1	2951	2958	.	8.68	GGGAGGAG
1-GGGGGGAG	STREME-1	transcript_PVP01_0507300.1	1685	1692	.	8.68	GGGAGGAG
1-GGGGGGAG	STREME-1	transcript_PVP01_0927500.1	957	964	.	8.68	GGAGGGAG
1-GGGGGGAG	STREME-1	transcript_PVP01_1117300.1	2278	2285	.	8.68	GGGAGGAG
1-GGGGGGAG	STREME-1	transcript_PVP01_0819800.1	1526	1533	.	8.68	GGGAGGAG
1-GGGGGGAG	STREME-1	transcript_PVP01_0819800.1	2852	2859	.	8.68	GGGAGGAG
1-GGGGGGAG	STREME-1	transcript_PVP01_0819800.1	4734	4741	.	8.68	GGGAGGAG
1-GGGGGGAG	STREME-1	transcript_PVP01_0819800.1	5066	5073	.	8.68	GGGAGGAG
1-GGGGGGAG	STREME-1	transcript_PVP01_0819800.1	9153	9160	.	8.68	GGGAGGAG
1-GGGGGGAG	STREME-1	transcript_PVP01_1345400.1	2272	2279	.	8.68	GGAGGGAG
1-GGGGGGAG	STREME-1	transcript_PVP01_1015200.1	2573	2580	.	8.68	GGAGGGAG
1-GGGGGGAG	STREME-1	transcript_PVP01_1015200.1	3141	3148	.	8.68	GGGAGGAG
1-GGGGGGAG	STREME-1	transcript_PVP01_1015200.1	3885	3892	.	8.68	GGAGGGAG
1-GGGGGGAG	STREME-1	transcript_PVP01_1015200.1	3924	3931	.	8.68	GGAGGGAG
1-GGGGGGAG	STREME-1	transcript_PVP01_1341100.1	4886	4893	.	8.68	GGGAGGAG
1-GGGGGGAG	STREME-1	transcript_PVP01_1306900.1	929	936	.	8.68	GGGAGGAG
1-GGGGGGAG	STREME-1	transcript_PVP01_1306900.1	1328	1335	.	8.68	GGGAGGAG
1-GGGGGGAG	STREME-1	transcript_PVP01_1140100.1	3427	3434	.	8.68	GGAGGGAG
1-GGGGGGAG	STREME-1	transcript_PVP01_1463800.1	756	763	.	8.68	GGGAGGAG
1-GGGGGGAG	STREME-1	transcript_PVP01_1463800.1	1007	1014	.	8.68	GGGAGGAG
1-GGGGGGAG	STREME-1	transcript_PVP01_1009100.1	505	512	.	8.68	GGAGGGAG
1-GGGGGGAG	STREME-1	transcript_PVP01_0707600.1	1843	1850	.	8.68	GGAGGGAG
1-GGGGGGAG	STREME-1	transcript_PVP01_1411800.1	3107	3114	.	8.68	GGGAGGAG
1-GGGGGGAG	STREME-1	transcript_PVP01_1323700.1	43	50	.	8.68	GGGAGGAG
1-GGGGGGAG	STREME-1	transcript_PVP01_1323700.1	171	178	.	8.68	GGGAGGAG
1-GGGGGGAG	STREME-1	transcript_PVP01_1323700.1	2579	2586	.	8.68	GGGAGGAG
1-GGGGGGAG	STREME-1	transcript_PVP01_1323700.1	2859	2866	.	8.68	GGGAGGAG
1-GGGGGGAG	STREME-1	transcript_PVP01_0514900.1	2081	2088	.	8.68	GGAGGGAG
1-GGGGGGAG	STREME-1	transcript_PVP01_0507200.1	4004	4011	.	8.68	GGAGGGAG
1-GGGGGGAG	STREME-1	transcript_PVP01_1304200.1	1272	1279	.	8.68	GGGAGGAG
1-GGGGGGAG	STREME-1	transcript_PVP01_0830300.1	961	968	.	8.68	GGGAGGAG
1-GGGGGGAG	STREME-1	transcript_PVP01_0830300.1	1047	1054	.	8.68	GGGAGGAG
1-GGGGGGAG	STREME-1	transcript_PVP01_0830300.1	3473	3480	.	8.68	GGAGGGAG
1-GGGGGGAG	STREME-1	transcript_PVP01_0830300.1	4017	4024	.	8.68	GGAGGGAG
1-GGGGGGAG	STREME-1	transcript_PVP01_0312500.1	2176	2183	.	8.68	GGAGGGAG
1-GGGGGGAG	STREME-1	transcript_PVP01_0832300.1	1618	1625	.	8.68	GGAGGGAG
1-GGGGGGAG	STREME-1	transcript_PVP01_0832300.1	4293	4300	.	8.68	GGGAGGAG
1-GGGGGGAG	STREME-1	transcript_PVP01_0832300.1	6663	6670	.	8.68	GGAGGGAG
1-GGGGGGAG	STREME-1	transcript_PVP01_0832300.1	8250	8257	.	8.68	GGAGGGAG
1-GGGGGGAG	STREME-1	transcript_PVP01_0832300.1	10430	10437	.	8.68	GGGAGGAG
1-GGGGGGAG	STREME-1	transcript_PVP01_1111400.1	3960	3967	.	8.68	GGGAGGAG
1-GGGGGGAG	STREME-1	transcript_PVP01_1111400.1	4249	4256	.	8.68	GGAGGGAG
1-GGGGGGAG	STREME-1	transcript_PVP01_1123300.1	1276	1283	.	8.68	GGGAGGAG
1-GGGGGGAG	STREME-1	transcript_PVP01_0617700.1	881	888	.	8.68	GGGAGGAG
1-GGGGGGAG	STREME-1	transcript_PVP01_0917800.1	3280	3287	.	8.68	GGAGGGAG
1-GGGGGGAG	STREME-1	transcript_PVP01_0820400.1	1272	1279	.	8.68	GGGAGGAG
1-GGGGGGAG	STREME-1	transcript_PVP01_1208000.1	1405	1412	.	8.68	GGAGGGAG
1-GGGGGGAG	STREME-1	transcript_PVP01_0210000.1	226	233	.	8.68	GGAGGGAG
1-GGGGGGAG	STREME-1	transcript_PVP01_1311600.1	108	115	.	8.68	GGGAGGAG
1-GGGGGGAG	STREME-1	transcript_PVP01_0937500.1	2947	2954	.	8.68	GGGAGGAG
1-GGGGGGAG	STREME-1	transcript_PVP01_0937500.1	4199	4206	.	8.68	GGGAGGAG
1-GGGGGGAG	STREME-1	transcript_PVP01_1236700.1	1307	1314	.	8.68	GGAGGGAG
1-GGGGGGAG	STREME-1	transcript_PVP01_1236700.1	1552	1559	.	8.68	GGAGGGAG
1-GGGGGGAG	STREME-1	transcript_PVP01_1236700.1	1588	1595	.	8.68	GGAGGGAG
1-GGGGGGAG	STREME-1	transcript_PVP01_1236700.1	4212	4219	.	8.68	GGGAGGAG
1-GGGGGGAG	STREME-1	transcript_PVP01_1236700.1	5101	5108	.	8.68	GGGAGGAG
1-GGGGGGAG	STREME-1	transcript_PVP01_1236700.1	5826	5833	.	8.68	GGAGGGAG
1-GGGGGGAG	STREME-1	transcript_PVP01_1236700.1	6144	6151	.	8.68	GGGAGGAG
1-GGGGGGAG	STREME-1	transcript_PVP01_0708400.1	1141	1148	.	8.68	GGAGGGAG
1-GGGGGGAG	STREME-1	transcript_PVP01_0708400.1	3399	3406	.	8.68	GGGAGGAG
1-GGGGGGAG	STREME-1	transcript_PVP01_0936700.1	678	685	.	8.68	GGAGGGAG
1-GGGGGGAG	STREME-1	transcript_PVP01_1140700.1	980	987	.	8.68	GGGAGGAG
1-GGGGGGAG	STREME-1	transcript_PVP01_1238800.1	3826	3833	.	8.68	GGGAGGAG
1-GGGGGGAG	STREME-1	transcript_PVP01_1112600.1	1106	1113	.	8.68	GGAGGGAG
1-GGGGGGAG	STREME-1	transcript_PVP01_1112600.1	1472	1479	.	8.68	GGAGGGAG
1-GGGGGGAG	STREME-1	transcript_PVP01_1112600.1	1520	1527	.	8.68	GGAGGGAG
1-GGGGGGAG	STREME-1	transcript_PVP01_0114500.1	1421	1428	.	8.68	GGAGGGAG
1-GGGGGGAG	STREME-1	transcript_PVP01_0114500.1	2392	2399	.	8.68	GGAGGGAG
1-GGGGGGAG	STREME-1	transcript_PVP01_1247800.1	824	831	.	8.68	GGAGGGAG
1-GGGGGGAG	STREME-1	transcript_PVP01_1247200.1	136	143	.	8.68	GGGAGGAG
1-GGGGGGAG	STREME-1	transcript_PVP01_1254800.1	949	956	.	8.68	GGAGGGAG
1-GGGGGGAG	STREME-1	transcript_PVP01_0414400.1	804	811	.	8.68	GGAGGGAG
1-GGGGGGAG	STREME-1	transcript_PVP01_1251100.1	336	343	.	8.68	GGAGGGAG
1-GGGGGGAG	STREME-1	transcript_PVP01_0930100.1	35	42	.	8.68	GGGAGGAG
1-GGGGGGAG	STREME-1	transcript_PVP01_1464900.1	2162	2169	.	8.68	GGGAGGAG
1-GGGGGGAG	STREME-1	transcript_PVP01_1464900.1	3493	3500	.	8.68	GGGAGGAG
1-GGGGGGAG	STREME-1	transcript_PVP01_1464900.1	3508	3515	.	8.68	GGGAGGAG
1-GGGGGGAG	STREME-1	transcript_PVP01_1464900.1	3523	3530	.	8.68	GGGAGGAG
1-GGGGGGAG	STREME-1	transcript_PVP01_1009800.1	2628	2635	.	8.68	GGGAGGAG
1-GGGGGGAG	STREME-1	transcript_PVP01_1267300.1	785	792	.	8.68	GGAGGGAG
1-GGGGGGAG	STREME-1	transcript_PVP01_1267300.1	3020	3027	.	8.68	GGGAGGAG
1-GGGGGGAG	STREME-1	transcript_PVP01_0921200.1	3747	3754	.	8.68	GGGAGGAG
1-GGGGGGAG	STREME-1	transcript_PVP01_0921200.1	4189	4196	.	8.68	GGAGGGAG
1-GGGGGGAG	STREME-1	transcript_PVP01_0320800.1	1867	1874	.	8.68	GGGAGGAG
1-GGGGGGAG	STREME-1	transcript_PVP01_0320800.1	3198	3205	.	8.68	GGAGGGAG
1-GGGGGGAG	STREME-1	transcript_PVP01_0320800.1	3201	3208	.	8.68	GGGAGGAG
1-GGGGGGAG	STREME-1	transcript_PVP01_1109100.1	3915	3922	.	8.68	GGAGGGAG
1-GGGGGGAG	STREME-1	transcript_PVP01_0614800.1	80	87	.	8.68	GGAGGGAG
1-GGGGGGAG	STREME-1	transcript_PVP01_0930600.1	560	567	.	8.68	GGGAGGAG
1-GGGGGGAG	STREME-1	transcript_PVP01_1264400.1	7926	7933	.	8.68	GGGAGGAG
1-GGGGGGAG	STREME-1	transcript_PVP01_1455200.1	884	891	.	8.68	GGAGGGAG
1-GGGGGGAG	STREME-1	transcript_PVP01_1455200.1	3540	3547	.	8.68	GGAGGGAG
1-GGGGGGAG	STREME-1	transcript_PVP01_1455200.1	3543	3550	.	8.68	GGGAGGAG
1-GGGGGGAG	STREME-1	transcript_PVP01_1455200.1	4678	4685	.	8.68	GGAGGGAG
1-GGGGGGAG	STREME-1	transcript_PVP01_1455200.1	5881	5888	.	8.68	GGAGGGAG
1-GGGGGGAG	STREME-1	transcript_PVP01_1021100.1	1052	1059	.	8.68	GGAGGGAG
1-GGGGGGAG	STREME-1	transcript_PVP01_0808300.1	1228	1235	.	8.68	GGAGGGAG
1-GGGGGGAG	STREME-1	transcript_PVP01_0614200.1	1430	1437	.	8.68	GGAGGGAG
1-GGGGGGAG	STREME-1	transcript_PVP01_0614200.1	1663	1670	.	8.68	GGAGGGAG
1-GGGGGGAG	STREME-1	transcript_PVP01_1143200.1	735	742	.	8.68	GGAGGGAG
1-GGGGGGAG	STREME-1	transcript_PVP01_1022100.1	350	357	.	8.68	GGGAGGAG
1-GGGGGGAG	STREME-1	transcript_PVP01_0313800.1	11151	11158	.	8.68	GGGAGGAG
1-GGGGGGAG	STREME-1	transcript_PVP01_1232200.1	328	335	.	8.68	GGGAGGAG
1-GGGGGGAG	STREME-1	transcript_PVP01_1232200.1	997	1004	.	8.68	GGGAGGAG
1-GGGGGGAG	STREME-1	transcript_PVP01_1266800.1	1768	1775	.	8.68	GGGAGGAG
1-GGGGGGAG	STREME-1	transcript_PVP01_0106900.1	2913	2920	.	8.68	GGGAGGAG
1-GGGGGGAG	STREME-1	transcript_PVP01_0306600.1	1352	1359	.	8.68	GGGAGGAG
1-GGGGGGAG	STREME-1	transcript_PVP01_0306600.1	1769	1776	.	8.68	GGGAGGAG
1-GGGGGGAG	STREME-1	transcript_PVP01_0306600.1	2243	2250	.	8.68	GGAGGGAG
1-GGGGGGAG	STREME-1	transcript_PVP01_1214000.1	233	240	.	8.68	GGGAGGAG
1-GGGGGGAG	STREME-1	transcript_PVP01_0716800.1	1596	1603	.	8.68	GGAGGGAG
1-GGGGGGAG	STREME-1	transcript_PVP01_0716800.1	1599	1606	.	8.68	GGGAGGAG
1-GGGGGGAG	STREME-1	transcript_PVP01_1341600.1	218	225	.	8.68	GGGAGGAG
1-GGGGGGAG	STREME-1	transcript_PVP01_0530200.1	1024	1031	.	8.68	GGGAGGAG
1-GGGGGGAG	STREME-1	transcript_PVP01_0530200.1	2500	2507	.	8.68	GGAGGGAG
1-GGGGGGAG	STREME-1	transcript_PVP01_0520400.1	2101	2108	.	8.68	GGAGGGAG
1-GGGGGGAG	STREME-1	transcript_PVP01_0520400.1	2895	2902	.	8.68	GGGAGGAG
1-GGGGGGAG	STREME-1	transcript_PVP01_1318400.1	1217	1224	.	8.68	GGGAGGAG
1-GGGGGGAG	STREME-1	transcript_PVP01_1136100.1	590	597	.	8.68	GGGAGGAG
1-GGGGGGAG	STREME-1	transcript_PVP01_1120600.1	3437	3444	.	8.68	GGGAGGAG
1-GGGGGGAG	STREME-1	transcript_PVP01_1452500.1	359	366	.	8.68	GGGAGGAG
1-GGGGGGAG	STREME-1	transcript_PVP01_0304200.1	1764	1771	.	8.68	GGAGGGAG
1-GGGGGGAG	STREME-1	transcript_PVP01_0728800.1	2540	2547	.	8.68	GGGAGGAG
1-GGGGGGAG	STREME-1	transcript_PVP01_0728800.1	3467	3474	.	8.68	GGGAGGAG
1-GGGGGGAG	STREME-1	transcript_PVP01_1308600.1	1894	1901	.	8.68	GGGAGGAG
1-GGGGGGAG	STREME-1	transcript_PVP01_0911800.1	605	612	.	8.68	GGGAGGAG
1-GGGGGGAG	STREME-1	transcript_PVP01_1012000.1	524	531	.	8.68	GGAGGGAG
1-GGGGGGAG	STREME-1	transcript_PVP01_1012000.1	2368	2375	.	8.68	GGGAGGAG
1-GGGGGGAG	STREME-1	transcript_PVP01_1012000.1	3185	3192	.	8.68	GGGAGGAG
1-GGGGGGAG	STREME-1	transcript_PVP01_1244000.1	255	262	.	8.68	GGGAGGAG
1-GGGGGGAG	STREME-1	transcript_PVP01_1013800.1	3807	3814	.	8.68	GGGAGGAG
1-GGGGGGAG	STREME-1	transcript_PVP01_1144500.1	1130	1137	.	8.68	GGAGGGAG
1-GGGGGGAG	STREME-1	transcript_PVP01_1303400.1	481	488	.	8.68	GGGAGGAG
1-GGGGGGAG	STREME-1	transcript_PVP01_1009700.1	730	737	.	8.68	GGGAGGAG
1-GGGGGGAG	STREME-1	transcript_PVP01_0725700.1	1243	1250	.	8.68	GGGAGGAG
1-GGGGGGAG	STREME-1	transcript_PVP01_0725700.1	3430	3437	.	8.68	GGAGGGAG
1-GGGGGGAG	STREME-1	transcript_PVP01_0725700.1	4515	4522	.	8.68	GGGAGGAG
1-GGGGGGAG	STREME-1	transcript_PVP01_0207300.1	2444	2451	.	8.68	GGGAGGAG
1-GGGGGGAG	STREME-1	transcript_PVP01_0207300.1	5820	5827	.	8.68	GGAGGGAG
1-GGGGGGAG	STREME-1	transcript_PVP01_0207300.1	7605	7612	.	8.68	GGAGGGAG
1-GGGGGGAG	STREME-1	transcript_PVP01_0207300.1	8043	8050	.	8.68	GGGAGGAG
1-GGGGGGAG	STREME-1	transcript_PVP01_0207300.1	8926	8933	.	8.68	GGGAGGAG
1-GGGGGGAG	STREME-1	transcript_PVP01_0207300.1	9257	9264	.	8.68	GGAGGGAG
1-GGGGGGAG	STREME-1	transcript_PVP01_0614600.1	2098	2105	.	8.68	GGGAGGAG
1-GGGGGGAG	STREME-1	transcript_PVP01_0942900.1	703	710	.	8.68	GGGAGGAG
1-GGGGGGAG	STREME-1	transcript_PVP01_0208100.1	591	598	.	8.68	GGGAGGAG
1-GGGGGGAG	STREME-1	transcript_PVP01_0208100.1	1265	1272	.	8.68	GGAGGGAG
1-GGGGGGAG	STREME-1	transcript_PVP01_0208100.1	2159	2166	.	8.68	GGGAGGAG
1-GGGGGGAG	STREME-1	transcript_PVP01_1433000.1	1972	1979	.	8.68	GGAGGGAG
1-GGGGGGAG	STREME-1	transcript_PVP01_1433000.1	4215	4222	.	8.68	GGGAGGAG
1-GGGGGGAG	STREME-1	transcript_PVP01_1262600.1	672	679	.	8.68	GGGAGGAG
1-GGGGGGAG	STREME-1	transcript_PVP01_1262600.1	747	754	.	8.68	GGGAGGAG
1-GGGGGGAG	STREME-1	transcript_PVP01_1131600.1	2197	2204	.	8.68	GGGAGGAG
1-GGGGGGAG	STREME-1	transcript_PVP01_1142100.1	1899	1906	.	8.68	GGGAGGAG
1-GGGGGGAG	STREME-1	transcript_PVP01_0938600.1	1226	1233	.	8.68	GGGAGGAG
1-GGGGGGAG	STREME-1	transcript_PVP01_1462300.1	40	47	.	8.68	GGGAGGAG
1-GGGGGGAG	STREME-1	transcript_PVP01_0728700.1	2500	2507	.	8.68	GGGAGGAG
1-GGGGGGAG	STREME-1	transcript_PVP01_0421400.1	1525	1532	.	8.68	GGGAGGAG
1-GGGGGGAG	STREME-1	transcript_PVP01_0941200.1	1695	1702	.	8.68	GGAGGGAG
1-GGGGGGAG	STREME-1	transcript_PVP01_0941200.1	2095	2102	.	8.68	GGAGGGAG
1-GGGGGGAG	STREME-1	transcript_PVP01_0941200.1	3107	3114	.	8.68	GGGAGGAG
1-GGGGGGAG	STREME-1	transcript_PVP01_0941200.1	3209	3216	.	8.68	GGGAGGAG
1-GGGGGGAG	STREME-1	transcript_PVP01_0809800.1	15	22	.	8.68	GGGAGGAG
1-GGGGGGAG	STREME-1	transcript_PVP01_1439700.1	3154	3161	.	8.68	GGAGGGAG
1-GGGGGGAG	STREME-1	transcript_PVP01_1405500.1	1607	1614	.	8.68	GGGAGGAG
1-GGGGGGAG	STREME-1	transcript_PVP01_1428800.1	949	956	.	8.68	GGGAGGAG
1-GGGGGGAG	STREME-1	transcript_PVP01_0305200.1	1790	1797	.	8.68	GGGAGGAG
1-GGGGGGAG	STREME-1	transcript_PVP01_0732500.1	1073	1080	.	8.68	GGAGGGAG
1-GGGGGGAG	STREME-1	transcript_PVP01_1465500.1	731	738	.	8.68	GGAGGGAG
1-GGGGGGAG	STREME-1	transcript_PVP01_1465500.1	763	770	.	8.68	GGGAGGAG
1-GGGGGGAG	STREME-1	transcript_PVP01_0518400.1	1913	1920	.	8.68	GGAGGGAG
1-GGGGGGAG	STREME-1	transcript_PVP01_0306900.1	2112	2119	.	8.68	GGAGGGAG
1-GGGGGGAG	STREME-1	transcript_PVP01_0306900.1	2470	2477	.	8.68	GGAGGGAG
1-GGGGGGAG	STREME-1	transcript_PVP01_0215600.1	14593	14600	.	8.68	GGGAGGAG
1-GGGGGGAG	STREME-1	transcript_PVP01_0523000.1	620	627	.	8.68	GGGAGGAG
1-GGGGGGAG	STREME-1	transcript_PVP01_1212400.1	1416	1423	.	8.68	GGAGGGAG
1-GGGGGGAG	STREME-1	transcript_PVP01_0108500.1	698	705	.	8.68	GGAGGGAG
1-GGGGGGAG	STREME-1	transcript_PVP01_0108500.1	1170	1177	.	8.68	GGGAGGAG
1-GGGGGGAG	STREME-1	transcript_PVP01_0822200.1	726	733	.	8.68	GGGAGGAG
1-GGGGGGAG	STREME-1	transcript_PVP01_1248900.1	2509	2516	.	8.68	GGAGGGAG
1-GGGGGGAG	STREME-1	transcript_PVP01_0321000.1	1048	1055	.	8.68	GGAGGGAG
1-GGGGGGAG	STREME-1	transcript_PVP01_0617100.1	398	405	.	8.68	GGGGAGAG
1-GGGGGGAG	STREME-1	transcript_PVP01_0617100.1	1034	1041	.	8.68	GGGGAGAG
1-GGGGGGAG	STREME-1	transcript_PVP01_0508300.1	1387	1394	.	8.68	GGGGAGAG
1-GGGGGGAG	STREME-1	transcript_PVP01_0609600.1	201	208	.	8.68	GGGGAGAG
1-GGGGGGAG	STREME-1	transcript_PVP01_1227400.1	1589	1596	.	8.68	GGGGAGAG
1-GGGGGGAG	STREME-1	transcript_PVP01_1450100.1	227	234	.	8.68	GGGGAGAG
1-GGGGGGAG	STREME-1	transcript_PVP01_0923500.1	951	958	.	8.68	GGGGAGAG
1-GGGGGGAG	STREME-1	transcript_PVP01_0923500.1	14650	14657	.	8.68	GGGGAGAG
1-GGGGGGAG	STREME-1	transcript_PVP01_0940100.1	6373	6380	.	8.68	GGGGAGAG
1-GGGGGGAG	STREME-1	transcript_PVP01_0948300.1	1305	1312	.	8.68	GGGGAGAG
1-GGGGGGAG	STREME-1	transcript_PVP01_0318700.1	36	43	.	8.68	GGGGAGAG
1-GGGGGGAG	STREME-1	transcript_PVP01_1133200.1	1578	1585	.	8.68	GGGGAGAG
1-GGGGGGAG	STREME-1	transcript_PVP01_0207900.1	1402	1409	.	8.68	GGGGAGAG
1-GGGGGGAG	STREME-1	transcript_PVP01_0718800.1	2720	2727	.	8.68	GGGGAGAG
1-GGGGGGAG	STREME-1	transcript_PVP01_0510300.1	1293	1300	.	8.68	GGGGAGAG
1-GGGGGGAG	STREME-1	transcript_PVP01_1429200.1	1390	1397	.	8.68	GGGGAGAG
1-GGGGGGAG	STREME-1	transcript_PVP01_1210800.1	1682	1689	.	8.68	GGGGAGAG
1-GGGGGGAG	STREME-1	transcript_PVP01_1210800.1	2051	2058	.	8.68	GGGGAGAG
1-GGGGGGAG	STREME-1	transcript_PVP01_1210800.1	2380	2387	.	8.68	GGGGAGAG
1-GGGGGGAG	STREME-1	transcript_PVP01_0710600.1	1011	1018	.	8.68	GGGGAGAG
1-GGGGGGAG	STREME-1	transcript_PVP01_1020900.1	1074	1081	.	8.68	GGGGAGAG
1-GGGGGGAG	STREME-1	transcript_PVP01_1223500.1	1223	1230	.	8.68	GGGGAGAG
1-GGGGGGAG	STREME-1	transcript_PVP01_1223500.1	1238	1245	.	8.68	GGGGAGAG
1-GGGGGGAG	STREME-1	transcript_PVP01_1223500.1	1253	1260	.	8.68	GGGGAGAG
1-GGGGGGAG	STREME-1	transcript_PVP01_1223500.1	1268	1275	.	8.68	GGGGAGAG
1-GGGGGGAG	STREME-1	transcript_PVP01_1342900.1	2659	2666	.	8.68	GGGGAGAG
1-GGGGGGAG	STREME-1	transcript_PVP01_1306000.1	1119	1126	.	8.68	GGGGAGAG
1-GGGGGGAG	STREME-1	transcript_PVP01_1268500.1	505	512	.	8.68	GGGGAGAG
1-GGGGGGAG	STREME-1	transcript_PVP01_1264800.1	2141	2148	.	8.68	GGGGAGAG
1-GGGGGGAG	STREME-1	transcript_PVP01_1264800.1	2157	2164	.	8.68	GGGGAGAG
1-GGGGGGAG	STREME-1	transcript_PVP01_1221600.1	969	976	.	8.68	GGGGAGAG
1-GGGGGGAG	STREME-1	transcript_PVP01_0311700.1	1328	1335	.	8.68	GGGGAGAG
1-GGGGGGAG	STREME-1	transcript_PVP01_1309700.1	1027	1034	.	8.68	GGGGAGAG
1-GGGGGGAG	STREME-1	transcript_PVP01_1264700.1	2711	2718	.	8.68	GGGGAGAG
1-GGGGGGAG	STREME-1	transcript_PVP01_1437700.1	277	284	.	8.68	GGGGAGAG
1-GGGGGGAG	STREME-1	transcript_PVP01_1411400.1	1360	1367	.	8.68	GGGGAGAG
1-GGGGGGAG	STREME-1	transcript_PVP01_1262900.1	5020	5027	.	8.68	GGGGAGAG
1-GGGGGGAG	STREME-1	transcript_PVP01_1262900.1	14974	14981	.	8.68	GGGGAGAG
1-GGGGGGAG	STREME-1	transcript_PVP01_0409000.1	694	701	.	8.68	GGGGAGAG
1-GGGGGGAG	STREME-1	transcript_PVP01_1216300.1	683	690	.	8.68	GGGGAGAG
1-GGGGGGAG	STREME-1	transcript_PVP01_1216300.1	2413	2420	.	8.68	GGGGAGAG
1-GGGGGGAG	STREME-1	transcript_PVP01_1453900.1	2774	2781	.	8.68	GGGGAGAG
1-GGGGGGAG	STREME-1	transcript_PVP01_0940300.1	643	650	.	8.68	GGGGAGAG
1-GGGGGGAG	STREME-1	transcript_PVP01_1318200.1	1973	1980	.	8.68	GGGGAGAG
1-GGGGGGAG	STREME-1	transcript_PVP01_0918900.1	194	201	.	8.68	GGGGAGAG
1-GGGGGGAG	STREME-1	transcript_PVP01_1225900.1	2430	2437	.	8.68	GGGGAGAG
1-GGGGGGAG	STREME-1	transcript_PVP01_1301800.1	3205	3212	.	8.68	GGGGAGAG
1-GGGGGGAG	STREME-1	transcript_PVP01_0810500.1	4243	4250	.	8.68	GGGGAGAG
1-GGGGGGAG	STREME-1	transcript_PVP01_1108700.1	1868	1875	.	8.68	GGGGAGAG
1-GGGGGGAG	STREME-1	transcript_PVP01_0944400.1	92	99	.	8.68	GGGGAGAG
1-GGGGGGAG	STREME-1	transcript_PVP01_1345000.1	1911	1918	.	8.68	GGGGAGAG
1-GGGGGGAG	STREME-1	transcript_PVP01_0828600.1	3251	3258	.	8.68	GGGGAGAG
1-GGGGGGAG	STREME-1	transcript_PVP01_0828600.1	3293	3300	.	8.68	GGGGAGAG
1-GGGGGGAG	STREME-1	transcript_PVP01_0608400.1	2037	2044	.	8.68	GGGGAGAG
1-GGGGGGAG	STREME-1	transcript_PVP01_0803500.1	1123	1130	.	8.68	GGGGAGAG
1-GGGGGGAG	STREME-1	transcript_PVP01_0803500.1	4117	4124	.	8.68	GGGGAGAG
1-GGGGGGAG	STREME-1	transcript_PVP01_0803500.1	4219	4226	.	8.68	GGGGAGAG
1-GGGGGGAG	STREME-1	transcript_PVP01_0813200.1	663	670	.	8.68	GGGGAGAG
1-GGGGGGAG	STREME-1	transcript_PVP01_0604500.1	958	965	.	8.68	GGGGAGAG
1-GGGGGGAG	STREME-1	transcript_PVP01_0604500.1	1563	1570	.	8.68	GGGGAGAG
1-GGGGGGAG	STREME-1	transcript_PVP01_1269100.1	355	362	.	8.68	GGGGAGAG
1-GGGGGGAG	STREME-1	transcript_PVP01_1033300.1	1014	1021	.	8.68	GGGGAGAG
1-GGGGGGAG	STREME-1	transcript_PVP01_0732400.1	726	733	.	8.68	GGGGAGAG
1-GGGGGGAG	STREME-1	transcript_PVP01_0817600.1	4909	4916	.	8.68	GGGGAGAG
1-GGGGGGAG	STREME-1	transcript_PVP01_1405700.1	1395	1402	.	8.68	GGGGAGAG
1-GGGGGGAG	STREME-1	transcript_PVP01_0411500.1	1525	1532	.	8.68	GGGGAGAG
1-GGGGGGAG	STREME-1	transcript_PVP01_0918100.1	558	565	.	8.68	GGGGAGAG
1-GGGGGGAG	STREME-1	transcript_PVP01_0927500.1	4417	4424	.	8.68	GGGGAGAG
1-GGGGGGAG	STREME-1	transcript_PVP01_1103200.1	2947	2954	.	8.68	GGGGAGAG
1-GGGGGGAG	STREME-1	transcript_PVP01_1220800.1	3721	3728	.	8.68	GGGGAGAG
1-GGGGGGAG	STREME-1	transcript_PVP01_1341100.1	4983	4990	.	8.68	GGGGAGAG
1-GGGGGGAG	STREME-1	transcript_PVP01_1306900.1	2581	2588	.	8.68	GGGGAGAG
1-GGGGGGAG	STREME-1	transcript_PVP01_0939600.1	2517	2524	.	8.68	GGGGAGAG
1-GGGGGGAG	STREME-1	transcript_PVP01_1463800.1	647	654	.	8.68	GGGGAGAG
1-GGGGGGAG	STREME-1	transcript_PVP01_1009100.1	210	217	.	8.68	GGGGAGAG
1-GGGGGGAG	STREME-1	transcript_PVP01_0514900.1	1062	1069	.	8.68	GGGGAGAG
1-GGGGGGAG	STREME-1	transcript_PVP01_0312500.1	904	911	.	8.68	GGGGAGAG
1-GGGGGGAG	STREME-1	transcript_PVP01_0312500.1	1709	1716	.	8.68	GGGGAGAG
1-GGGGGGAG	STREME-1	transcript_PVP01_0832300.1	3797	3804	.	8.68	GGGGAGAG
1-GGGGGGAG	STREME-1	transcript_PVP01_0832300.1	4611	4618	.	8.68	GGGGAGAG
1-GGGGGGAG	STREME-1	transcript_PVP01_0832300.1	5939	5946	.	8.68	GGGGAGAG
1-GGGGGGAG	STREME-1	transcript_PVP01_0832300.1	6854	6861	.	8.68	GGGGAGAG
1-GGGGGGAG	STREME-1	transcript_PVP01_0212600.1	580	587	.	8.68	GGGGAGAG
1-GGGGGGAG	STREME-1	transcript_PVP01_1111400.1	3449	3456	.	8.68	GGGGAGAG
1-GGGGGGAG	STREME-1	transcript_PVP01_1111400.1	4667	4674	.	8.68	GGGGAGAG
1-GGGGGGAG	STREME-1	transcript_PVP01_0617700.1	907	914	.	8.68	GGGGAGAG
1-GGGGGGAG	STREME-1	transcript_PVP01_0917800.1	2439	2446	.	8.68	GGGGAGAG
1-GGGGGGAG	STREME-1	transcript_PVP01_1208000.1	2064	2071	.	8.68	GGGGAGAG
1-GGGGGGAG	STREME-1	transcript_PVP01_1305200.1	550	557	.	8.68	GGGGAGAG
1-GGGGGGAG	STREME-1	transcript_PVP01_1311600.1	3503	3510	.	8.68	GGGGAGAG
1-GGGGGGAG	STREME-1	transcript_PVP01_1140700.1	1576	1583	.	8.68	GGGGAGAG
1-GGGGGGAG	STREME-1	transcript_PVP01_1315800.1	4010	4017	.	8.68	GGGGAGAG
1-GGGGGGAG	STREME-1	transcript_PVP01_0103600.1	2777	2784	.	8.68	GGGGAGAG
1-GGGGGGAG	STREME-1	transcript_PVP01_0113900.1	2974	2981	.	8.68	GGGGAGAG
1-GGGGGGAG	STREME-1	transcript_PVP01_1238800.1	185	192	.	8.68	GGGGAGAG
1-GGGGGGAG	STREME-1	transcript_PVP01_1238800.1	1506	1513	.	8.68	GGGGAGAG
1-GGGGGGAG	STREME-1	transcript_PVP01_1109000.1	198	205	.	8.68	GGGGAGAG
1-GGGGGGAG	STREME-1	transcript_PVP01_1109000.1	733	740	.	8.68	GGGGAGAG
1-GGGGGGAG	STREME-1	transcript_PVP01_1342200.1	497	504	.	8.68	GGGGAGAG
1-GGGGGGAG	STREME-1	transcript_PVP01_1438400.1	3045	3052	.	8.68	GGGGAGAG
1-GGGGGGAG	STREME-1	transcript_PVP01_1254800.1	938	945	.	8.68	GGGGAGAG
1-GGGGGGAG	STREME-1	transcript_PVP01_0414400.1	296	303	.	8.68	GGGGAGAG
1-GGGGGGAG	STREME-1	transcript_PVP01_1251100.1	4814	4821	.	8.68	GGGGAGAG
1-GGGGGGAG	STREME-1	transcript_PVP01_1468600.1	844	851	.	8.68	GGGGAGAG
1-GGGGGGAG	STREME-1	transcript_PVP01_0921200.1	596	603	.	8.68	GGGGAGAG
1-GGGGGGAG	STREME-1	transcript_PVP01_0921200.1	2600	2607	.	8.68	GGGGAGAG
1-GGGGGGAG	STREME-1	transcript_PVP01_0921200.1	2883	2890	.	8.68	GGGGAGAG
1-GGGGGGAG	STREME-1	transcript_PVP01_1444200.1	1439	1446	.	8.68	GGGGAGAG
1-GGGGGGAG	STREME-1	transcript_PVP01_0614800.1	746	753	.	8.68	GGGGAGAG
1-GGGGGGAG	STREME-1	transcript_PVP01_1021100.1	1393	1400	.	8.68	GGGGAGAG
1-GGGGGGAG	STREME-1	transcript_PVP01_1267800.1	583	590	.	8.68	GGGGAGAG
1-GGGGGGAG	STREME-1	transcript_PVP01_1428300.1	558	565	.	8.68	GGGGAGAG
1-GGGGGGAG	STREME-1	transcript_PVP01_0313800.1	855	862	.	8.68	GGGGAGAG
1-GGGGGGAG	STREME-1	transcript_PVP01_1415800.1	2015	2022	.	8.68	GGGGAGAG
1-GGGGGGAG	STREME-1	transcript_PVP01_0106900.1	2545	2552	.	8.68	GGGGAGAG
1-GGGGGGAG	STREME-1	transcript_PVP01_0719700.1	1039	1046	.	8.68	GGGGAGAG
1-GGGGGGAG	STREME-1	transcript_PVP01_0719700.1	5821	5828	.	8.68	GGGGAGAG
1-GGGGGGAG	STREME-1	transcript_PVP01_0716800.1	1859	1866	.	8.68	GGGGAGAG
1-GGGGGGAG	STREME-1	transcript_PVP01_0716800.1	1910	1917	.	8.68	GGGGAGAG
1-GGGGGGAG	STREME-1	transcript_PVP01_1237300.1	902	909	.	8.68	GGGGAGAG
1-GGGGGGAG	STREME-1	transcript_PVP01_0530200.1	4792	4799	.	8.68	GGGGAGAG
1-GGGGGGAG	STREME-1	transcript_PVP01_1234900.1	4026	4033	.	8.68	GGGGAGAG
1-GGGGGGAG	STREME-1	transcript_PVP01_1452500.1	1129	1136	.	8.68	GGGGAGAG
1-GGGGGGAG	STREME-1	transcript_PVP01_0728800.1	2419	2426	.	8.68	GGGGAGAG
1-GGGGGGAG	STREME-1	transcript_PVP01_0728800.1	4303	4310	.	8.68	GGGGAGAG
1-GGGGGGAG	STREME-1	transcript_PVP01_1012000.1	2068	2075	.	8.68	GGGGAGAG
1-GGGGGGAG	STREME-1	transcript_PVP01_0942400.1	151	158	.	8.68	GGGGAGAG
1-GGGGGGAG	STREME-1	transcript_PVP01_1009700.1	1335	1342	.	8.68	GGGGAGAG
1-GGGGGGAG	STREME-1	transcript_PVP01_0725100.1	1040	1047	.	8.68	GGGGAGAG
1-GGGGGGAG	STREME-1	transcript_PVP01_0725700.1	2573	2580	.	8.68	GGGGAGAG
1-GGGGGGAG	STREME-1	transcript_PVP01_1261200.1	3219	3226	.	8.68	GGGGAGAG
1-GGGGGGAG	STREME-1	transcript_PVP01_0207300.1	1261	1268	.	8.68	GGGGAGAG
1-GGGGGGAG	STREME-1	transcript_PVP01_0207300.1	3805	3812	.	8.68	GGGGAGAG
1-GGGGGGAG	STREME-1	transcript_PVP01_0207300.1	6305	6312	.	8.68	GGGGAGAG
1-GGGGGGAG	STREME-1	transcript_PVP01_0207300.1	8416	8423	.	8.68	GGGGAGAG
1-GGGGGGAG	STREME-1	transcript_PVP01_0916200.1	2104	2111	.	8.68	GGGGAGAG
1-GGGGGGAG	STREME-1	transcript_PVP01_1445100.1	314	321	.	8.68	GGGGAGAG
1-GGGGGGAG	STREME-1	transcript_PVP01_0947400.1	333	340	.	8.68	GGGGAGAG
1-GGGGGGAG	STREME-1	transcript_PVP01_1142100.1	1918	1925	.	8.68	GGGGAGAG
1-GGGGGGAG	STREME-1	transcript_PVP01_1462300.1	65	72	.	8.68	GGGGAGAG
1-GGGGGGAG	STREME-1	transcript_PVP01_1023700.1	2049	2056	.	8.68	GGGGAGAG
1-GGGGGGAG	STREME-1	transcript_PVP01_0927000.1	303	310	.	8.68	GGGGAGAG
1-GGGGGGAG	STREME-1	transcript_PVP01_0209300.1	526	533	.	8.68	GGGGAGAG
1-GGGGGGAG	STREME-1	transcript_PVP01_1465500.1	696	703	.	8.68	GGGGAGAG
1-GGGGGGAG	STREME-1	transcript_PVP01_0303500.1	348	355	.	8.68	GGGGAGAG
1-GGGGGGAG	STREME-1	transcript_PVP01_0938900.1	1251	1258	.	8.68	GGGGAGAG
1-GGGGGGAG	STREME-1	transcript_PVP01_1326600.1	4292	4299	.	8.68	GGGGAGAG
1-GGGGGGAG	STREME-1	transcript_PVP01_0215600.1	7407	7414	.	8.68	GGGGAGAG
1-GGGGGGAG	STREME-1	transcript_PVP01_1270300.1	7268	7275	.	8.59	GAGGGGAG
1-GGGGGGAG	STREME-1	transcript_PVP01_0702200.1	5042	5049	.	8.59	GAGGGGAG
1-GGGGGGAG	STREME-1	transcript_PVP01_1449100.1	781	788	.	8.59	GAGGGGAG
1-GGGGGGAG	STREME-1	transcript_PVP01_1442800.1	1429	1436	.	8.59	GAGGGGAG
1-GGGGGGAG	STREME-1	transcript_PVP01_1466200.1	1302	1309	.	8.59	GAGGGGAG
1-GGGGGGAG	STREME-1	transcript_PVP01_1228100.1	771	778	.	8.59	GAGGGGAG
1-GGGGGGAG	STREME-1	transcript_PVP01_0923500.1	949	956	.	8.59	GAGGGGAG
1-GGGGGGAG	STREME-1	transcript_PVP01_0709300.1	124	131	.	8.59	GAGGGGAG
1-GGGGGGAG	STREME-1	transcript_PVP01_1133200.1	4814	4821	.	8.59	GAGGGGAG
1-GGGGGGAG	STREME-1	transcript_PVP01_1322800.1	2153	2160	.	8.59	GAGGGGAG
1-GGGGGGAG	STREME-1	transcript_PVP01_1007200.1	4708	4715	.	8.59	GAGGGGAG
1-GGGGGGAG	STREME-1	transcript_PVP01_1210800.1	506	513	.	8.59	GAGGGGAG
1-GGGGGGAG	STREME-1	transcript_PVP01_1212500.1	690	697	.	8.59	GAGGGGAG
1-GGGGGGAG	STREME-1	transcript_PVP01_1212500.1	720	727	.	8.59	GAGGGGAG
1-GGGGGGAG	STREME-1	transcript_PVP01_1212500.1	750	757	.	8.59	GAGGGGAG
1-GGGGGGAG	STREME-1	transcript_PVP01_1212500.1	1127	1134	.	8.59	GAGGGGAG
1-GGGGGGAG	STREME-1	transcript_PVP01_1306000.1	1117	1124	.	8.59	GAGGGGAG
1-GGGGGGAG	STREME-1	transcript_PVP01_1109800.1	2080	2087	.	8.59	GAGGGGAG
1-GGGGGGAG	STREME-1	transcript_PVP01_1239600.1	2261	2268	.	8.59	GAGGGGAG
1-GGGGGGAG	STREME-1	transcript_PVP01_1241000.1	10627	10634	.	8.59	GAGGGGAG
1-GGGGGGAG	STREME-1	transcript_PVP01_1250800.1	70	77	.	8.59	GAGGGGAG
1-GGGGGGAG	STREME-1	transcript_PVP01_0212900.1	2891	2898	.	8.59	GAGGGGAG
1-GGGGGGAG	STREME-1	transcript_PVP01_1216300.1	203	210	.	8.59	GAGGGGAG
1-GGGGGGAG	STREME-1	transcript_PVP01_0703600.1	1071	1078	.	8.59	GAGGGGAG
1-GGGGGGAG	STREME-1	transcript_PVP01_0522600.1	1797	1804	.	8.59	GAGGGGAG
1-GGGGGGAG	STREME-1	transcript_PVP01_1453900.1	5033	5040	.	8.59	GAGGGGAG
1-GGGGGGAG	STREME-1	transcript_PVP01_0940300.1	518	525	.	8.59	GAGGGGAG
1-GGGGGGAG	STREME-1	transcript_PVP01_0411300.1	245	252	.	8.59	GAGGGGAG
1-GGGGGGAG	STREME-1	transcript_PVP01_1318200.1	1971	1978	.	8.59	GAGGGGAG
1-GGGGGGAG	STREME-1	transcript_PVP01_1442600.1	1032	1039	.	8.59	GAGGGGAG
1-GGGGGGAG	STREME-1	transcript_PVP01_1442600.1	1052	1059	.	8.59	GAGGGGAG
1-GGGGGGAG	STREME-1	transcript_PVP01_1263500.1	865	872	.	8.59	GAGGGGAG
1-GGGGGGAG	STREME-1	transcript_PVP01_1406700.1	1208	1215	.	8.59	GAGGGGAG
1-GGGGGGAG	STREME-1	transcript_PVP01_0527000.1	385	392	.	8.59	GAGGGGAG
1-GGGGGGAG	STREME-1	transcript_PVP01_0527000.1	2120	2127	.	8.59	GAGGGGAG
1-GGGGGGAG	STREME-1	transcript_PVP01_1108700.1	1866	1873	.	8.59	GAGGGGAG
1-GGGGGGAG	STREME-1	transcript_PVP01_0828600.1	3291	3298	.	8.59	GAGGGGAG
1-GGGGGGAG	STREME-1	transcript_PVP01_0813200.1	979	986	.	8.59	GAGGGGAG
1-GGGGGGAG	STREME-1	transcript_PVP01_1011000.1	7632	7639	.	8.59	GAGGGGAG
1-GGGGGGAG	STREME-1	transcript_PVP01_0604500.1	2109	2116	.	8.59	GAGGGGAG
1-GGGGGGAG	STREME-1	transcript_PVP01_0732400.1	202	209	.	8.59	GAGGGGAG
1-GGGGGGAG	STREME-1	transcript_PVP01_1323100.1	3284	3291	.	8.59	GAGGGGAG
1-GGGGGGAG	STREME-1	transcript_PVP01_0817600.1	2740	2747	.	8.59	GAGGGGAG
1-GGGGGGAG	STREME-1	transcript_PVP01_0834400.1	3657	3664	.	8.59	GAGGGGAG
1-GGGGGGAG	STREME-1	transcript_PVP01_0927500.1	2614	2621	.	8.59	GAGGGGAG
1-GGGGGGAG	STREME-1	transcript_PVP01_0506300.1	1749	1756	.	8.59	GAGGGGAG
1-GGGGGGAG	STREME-1	transcript_PVP01_1015200.1	3026	3033	.	8.59	GAGGGGAG
1-GGGGGGAG	STREME-1	transcript_PVP01_1341100.1	682	689	.	8.59	GAGGGGAG
1-GGGGGGAG	STREME-1	transcript_PVP01_1341100.1	1380	1387	.	8.59	GAGGGGAG
1-GGGGGGAG	STREME-1	transcript_PVP01_1306900.1	2579	2586	.	8.59	GAGGGGAG
1-GGGGGGAG	STREME-1	transcript_PVP01_1463800.1	925	932	.	8.59	GAGGGGAG
1-GGGGGGAG	STREME-1	transcript_PVP01_1411800.1	1382	1389	.	8.59	GAGGGGAG
1-GGGGGGAG	STREME-1	transcript_PVP01_1323700.1	940	947	.	8.59	GAGGGGAG
1-GGGGGGAG	STREME-1	transcript_PVP01_1323700.1	1384	1391	.	8.59	GAGGGGAG
1-GGGGGGAG	STREME-1	transcript_PVP01_0713900.1	1573	1580	.	8.59	GAGGGGAG
1-GGGGGGAG	STREME-1	transcript_PVP01_1344000.1	2387	2394	.	8.59	GAGGGGAG
1-GGGGGGAG	STREME-1	transcript_PVP01_0832300.1	6852	6859	.	8.59	GAGGGGAG
1-GGGGGGAG	STREME-1	transcript_PVP01_1024000.1	430	437	.	8.59	GAGGGGAG
1-GGGGGGAG	STREME-1	transcript_PVP01_1339800.1	559	566	.	8.59	GAGGGGAG
1-GGGGGGAG	STREME-1	transcript_PVP01_0617700.1	2029	2036	.	8.59	GAGGGGAG
1-GGGGGGAG	STREME-1	transcript_PVP01_0937500.1	4216	4223	.	8.59	GAGGGGAG
1-GGGGGGAG	STREME-1	transcript_PVP01_1315800.1	4680	4687	.	8.59	GAGGGGAG
1-GGGGGGAG	STREME-1	transcript_PVP01_1334000.1	460	467	.	8.59	GAGGGGAG
1-GGGGGGAG	STREME-1	transcript_PVP01_1109000.1	196	203	.	8.59	GAGGGGAG
1-GGGGGGAG	STREME-1	transcript_PVP01_1109000.1	731	738	.	8.59	GAGGGGAG
1-GGGGGGAG	STREME-1	transcript_PVP01_1414100.1	1444	1451	.	8.59	GAGGGGAG
1-GGGGGGAG	STREME-1	transcript_PVP01_1466100.1	3044	3051	.	8.59	GAGGGGAG
1-GGGGGGAG	STREME-1	transcript_PVP01_0114500.1	769	776	.	8.59	GAGGGGAG
1-GGGGGGAG	STREME-1	transcript_PVP01_1342200.1	1526	1533	.	8.59	GAGGGGAG
1-GGGGGGAG	STREME-1	transcript_PVP01_0810700.1	465	472	.	8.59	GAGGGGAG
1-GGGGGGAG	STREME-1	transcript_PVP01_1415000.1	64	71	.	8.59	GAGGGGAG
1-GGGGGGAG	STREME-1	transcript_PVP01_0414400.1	2523	2530	.	8.59	GAGGGGAG
1-GGGGGGAG	STREME-1	transcript_PVP01_1256400.1	1611	1618	.	8.59	GAGGGGAG
1-GGGGGGAG	STREME-1	transcript_PVP01_1462400.1	850	857	.	8.59	GAGGGGAG
1-GGGGGGAG	STREME-1	transcript_PVP01_1009800.1	1997	2004	.	8.59	GAGGGGAG
1-GGGGGGAG	STREME-1	transcript_PVP01_0921200.1	2881	2888	.	8.59	GAGGGGAG
1-GGGGGGAG	STREME-1	transcript_PVP01_0921200.1	3216	3223	.	8.59	GAGGGGAG
1-GGGGGGAG	STREME-1	transcript_PVP01_0320800.1	2473	2480	.	8.59	GAGGGGAG
1-GGGGGGAG	STREME-1	transcript_PVP01_0313800.1	853	860	.	8.59	GAGGGGAG
1-GGGGGGAG	STREME-1	transcript_PVP01_0313800.1	4094	4101	.	8.59	GAGGGGAG
1-GGGGGGAG	STREME-1	transcript_PVP01_0313800.1	9888	9895	.	8.59	GAGGGGAG
1-GGGGGGAG	STREME-1	transcript_PVP01_1111000.1	5068	5075	.	8.59	GAGGGGAG
1-GGGGGGAG	STREME-1	transcript_PVP01_0530200.1	1021	1028	.	8.59	GAGGGGAG
1-GGGGGGAG	STREME-1	transcript_PVP01_1234900.1	3261	3268	.	8.59	GAGGGGAG
1-GGGGGGAG	STREME-1	transcript_PVP01_0837600.1	4143	4150	.	8.59	GAGGGGAG
1-GGGGGGAG	STREME-1	transcript_PVP01_1122600.1	684	691	.	8.59	GAGGGGAG
1-GGGGGGAG	STREME-1	transcript_PVP01_1120600.1	2260	2267	.	8.59	GAGGGGAG
1-GGGGGGAG	STREME-1	transcript_PVP01_1303400.1	244	251	.	8.59	GAGGGGAG
1-GGGGGGAG	STREME-1	transcript_PVP01_0207300.1	2608	2615	.	8.59	GAGGGGAG
1-GGGGGGAG	STREME-1	transcript_PVP01_0207300.1	7286	7293	.	8.59	GAGGGGAG
1-GGGGGGAG	STREME-1	transcript_PVP01_0207300.1	8769	8776	.	8.59	GAGGGGAG
1-GGGGGGAG	STREME-1	transcript_PVP01_0908700.1	1581	1588	.	8.59	GAGGGGAG
1-GGGGGGAG	STREME-1	transcript_PVP01_0908700.1	2030	2037	.	8.59	GAGGGGAG
1-GGGGGGAG	STREME-1	transcript_PVP01_0208100.1	2522	2529	.	8.59	GAGGGGAG
1-GGGGGGAG	STREME-1	transcript_PVP01_1215200.1	3629	3636	.	8.59	GAGGGGAG
1-GGGGGGAG	STREME-1	transcript_PVP01_1425500.1	910	917	.	8.59	GAGGGGAG
1-GGGGGGAG	STREME-1	transcript_PVP01_1410600.1	303	310	.	8.59	GAGGGGAG
1-GGGGGGAG	STREME-1	transcript_PVP01_1268100.1	121	128	.	8.59	GAGGGGAG
1-GGGGGGAG	STREME-1	transcript_PVP01_1405500.1	1987	1994	.	8.59	GAGGGGAG
1-GGGGGGAG	STREME-1	transcript_PVP01_0209300.1	524	531	.	8.59	GAGGGGAG
1-GGGGGGAG	STREME-1	transcript_PVP01_0518400.1	1836	1843	.	8.59	GAGGGGAG
1-GGGGGGAG	STREME-1	transcript_PVP01_1212400.1	2462	2469	.	8.59	GAGGGGAG
1-GGGGGGAG	STREME-1	transcript_PVP01_0924500.1	159	166	.	8.59	GAGGGGAG
1-GGGGGGAG	STREME-1	transcript_PVP01_0924500.1	905	912	.	8.59	GAGGGGAG
1-GGGGGGAG	STREME-1	transcript_PVP01_0508300.1	595	602	.	8.58	GGGGGGAC
1-GGGGGGAG	STREME-1	transcript_PVP01_1433800.1	286	293	.	8.58	GGGGGGAC
1-GGGGGGAG	STREME-1	transcript_PVP01_1449100.1	2276	2283	.	8.58	GGGGGGAC
1-GGGGGGAG	STREME-1	transcript_PVP01_0713700.1	2294	2301	.	8.58	GGGGGGAC
1-GGGGGGAG	STREME-1	transcript_PVP01_0609600.1	1021	1028	.	8.58	GGGGGGAC
1-GGGGGGAG	STREME-1	transcript_PVP01_0811200.1	274	281	.	8.58	GGGGGGAC
1-GGGGGGAG	STREME-1	transcript_PVP01_1227400.1	1607	1614	.	8.58	GGGGGGAC
1-GGGGGGAG	STREME-1	transcript_PVP01_1227400.1	1627	1634	.	8.58	GGGGGGAC
1-GGGGGGAG	STREME-1	transcript_PVP01_1122800.1	435	442	.	8.58	GGGGGGAC
1-GGGGGGAG	STREME-1	transcript_PVP01_0923500.1	5410	5417	.	8.58	GGGGGGAC
1-GGGGGGAG	STREME-1	transcript_PVP01_0725800.1	3531	3538	.	8.58	GGGGGGAC
1-GGGGGGAG	STREME-1	transcript_PVP01_0834000.1	1869	1876	.	8.58	GGGGGGAC
1-GGGGGGAG	STREME-1	transcript_PVP01_1212600.1	2196	2203	.	8.58	GGGGGGAC
1-GGGGGGAG	STREME-1	transcript_PVP01_0718800.1	4530	4537	.	8.58	GGGGGGAC
1-GGGGGGAG	STREME-1	transcript_PVP01_1007200.1	5099	5106	.	8.58	GGGGGGAC
1-GGGGGGAG	STREME-1	transcript_PVP01_1412300.1	64	71	.	8.58	GGGGGGAC
1-GGGGGGAG	STREME-1	transcript_PVP01_0105400.1	587	594	.	8.58	GGGGGGAC
1-GGGGGGAG	STREME-1	transcript_PVP01_1268500.1	2936	2943	.	8.58	GGGGGGAC
1-GGGGGGAG	STREME-1	transcript_PVP01_1140300.1	2785	2792	.	8.58	GGGGGGAC
1-GGGGGGAG	STREME-1	transcript_PVP01_0603300.1	369	376	.	8.58	GGGGGGAC
1-GGGGGGAG	STREME-1	transcript_PVP01_1443200.1	4709	4716	.	8.58	GGGGGGAC
1-GGGGGGAG	STREME-1	transcript_PVP01_1262900.1	8336	8343	.	8.58	GGGGGGAC
1-GGGGGGAG	STREME-1	transcript_PVP01_1262900.1	12926	12933	.	8.58	GGGGGGAC
1-GGGGGGAG	STREME-1	transcript_PVP01_0409000.1	2235	2242	.	8.58	GGGGGGAC
1-GGGGGGAG	STREME-1	transcript_PVP01_0726600.1	2004	2011	.	8.58	GGGGGGAC
1-GGGGGGAG	STREME-1	transcript_PVP01_1252000.1	1444	1451	.	8.58	GGGGGGAC
1-GGGGGGAG	STREME-1	transcript_PVP01_1205000.1	1816	1823	.	8.58	GGGGGGAC
1-GGGGGGAG	STREME-1	transcript_PVP01_1340800.1	5644	5651	.	8.58	GGGGGGAC
1-GGGGGGAG	STREME-1	transcript_PVP01_1453900.1	265	272	.	8.58	GGGGGGAC
1-GGGGGGAG	STREME-1	transcript_PVP01_1453900.1	916	923	.	8.58	GGGGGGAC
1-GGGGGGAG	STREME-1	transcript_PVP01_0918900.1	1693	1700	.	8.58	GGGGGGAC
1-GGGGGGAG	STREME-1	transcript_PVP01_0918900.1	3807	3814	.	8.58	GGGGGGAC
1-GGGGGGAG	STREME-1	transcript_PVP01_1408700.1	526	533	.	8.58	GGGGGGAC
1-GGGGGGAG	STREME-1	transcript_PVP01_1407400.1	2210	2217	.	8.58	GGGGGGAC
1-GGGGGGAG	STREME-1	transcript_PVP01_1407400.1	4507	4514	.	8.58	GGGGGGAC
1-GGGGGGAG	STREME-1	transcript_PVP01_1407400.1	8450	8457	.	8.58	GGGGGGAC
1-GGGGGGAG	STREME-1	transcript_PVP01_0806400.1	1065	1072	.	8.58	GGGGGGAC
1-GGGGGGAG	STREME-1	transcript_PVP01_0527000.1	3666	3673	.	8.58	GGGGGGAC
1-GGGGGGAG	STREME-1	transcript_PVP01_0527800.1	2291	2298	.	8.58	GGGGGGAC
1-GGGGGGAG	STREME-1	transcript_PVP01_0204200.1	1135	1142	.	8.58	GGGGGGAC
1-GGGGGGAG	STREME-1	transcript_PVP01_1320400.1	493	500	.	8.58	GGGGGGAC
1-GGGGGGAG	STREME-1	transcript_PVP01_0803500.1	3370	3377	.	8.58	GGGGGGAC
1-GGGGGGAG	STREME-1	transcript_PVP01_1011000.1	5814	5821	.	8.58	GGGGGGAC
1-GGGGGGAG	STREME-1	transcript_PVP01_0604500.1	1210	1217	.	8.58	GGGGGGAC
1-GGGGGGAG	STREME-1	transcript_PVP01_0933300.1	1838	1845	.	8.58	GGGGGGAC
1-GGGGGGAG	STREME-1	transcript_PVP01_1269100.1	5195	5202	.	8.58	GGGGGGAC
1-GGGGGGAG	STREME-1	transcript_PVP01_0923200.1	2977	2984	.	8.58	GGGGGGAC
1-GGGGGGAG	STREME-1	transcript_PVP01_0732400.1	1700	1707	.	8.58	GGGGGGAC
1-GGGGGGAG	STREME-1	transcript_PVP01_0817600.1	5067	5074	.	8.58	GGGGGGAC
1-GGGGGGAG	STREME-1	transcript_PVP01_0817600.1	6000	6007	.	8.58	GGGGGGAC
1-GGGGGGAG	STREME-1	transcript_PVP01_0918100.1	1507	1514	.	8.58	GGGGGGAC
1-GGGGGGAG	STREME-1	transcript_PVP01_1106100.1	1888	1895	.	8.58	GGGGGGAC
1-GGGGGGAG	STREME-1	transcript_PVP01_1220800.1	4531	4538	.	8.58	GGGGGGAC
1-GGGGGGAG	STREME-1	transcript_PVP01_1463800.1	52	59	.	8.58	GGGGGGAC
1-GGGGGGAG	STREME-1	transcript_PVP01_1463800.1	1607	1614	.	8.58	GGGGGGAC
1-GGGGGGAG	STREME-1	transcript_PVP01_1323700.1	3134	3141	.	8.58	GGGGGGAC
1-GGGGGGAG	STREME-1	transcript_PVP01_1344000.1	5163	5170	.	8.58	GGGGGGAC
1-GGGGGGAG	STREME-1	transcript_PVP01_0507200.1	2843	2850	.	8.58	GGGGGGAC
1-GGGGGGAG	STREME-1	transcript_PVP01_0830300.1	1973	1980	.	8.58	GGGGGGAC
1-GGGGGGAG	STREME-1	transcript_PVP01_0312500.1	2873	2880	.	8.58	GGGGGGAC
1-GGGGGGAG	STREME-1	transcript_PVP01_0832300.1	2979	2986	.	8.58	GGGGGGAC
1-GGGGGGAG	STREME-1	transcript_PVP01_0212600.1	1069	1076	.	8.58	GGGGGGAC
1-GGGGGGAG	STREME-1	transcript_PVP01_1111400.1	3194	3201	.	8.58	GGGGGGAC
1-GGGGGGAG	STREME-1	transcript_PVP01_0708400.1	3480	3487	.	8.58	GGGGGGAC
1-GGGGGGAG	STREME-1	transcript_PVP01_1336400.1	1925	1932	.	8.58	GGGGGGAC
1-GGGGGGAG	STREME-1	transcript_PVP01_1314300.1	2623	2630	.	8.58	GGGGGGAC
1-GGGGGGAG	STREME-1	transcript_PVP01_1315800.1	2055	2062	.	8.58	GGGGGGAC
1-GGGGGGAG	STREME-1	transcript_PVP01_0515100.1	638	645	.	8.58	GGGGGGAC
1-GGGGGGAG	STREME-1	transcript_PVP01_1432200.1	1576	1583	.	8.58	GGGGGGAC
1-GGGGGGAG	STREME-1	transcript_PVP01_1432200.1	1752	1759	.	8.58	GGGGGGAC
1-GGGGGGAG	STREME-1	transcript_PVP01_0520600.1	303	310	.	8.58	GGGGGGAC
1-GGGGGGAG	STREME-1	transcript_PVP01_1254800.1	542	549	.	8.58	GGGGGGAC
1-GGGGGGAG	STREME-1	transcript_PVP01_1254800.1	1727	1734	.	8.58	GGGGGGAC
1-GGGGGGAG	STREME-1	transcript_PVP01_1109100.1	2770	2777	.	8.58	GGGGGGAC
1-GGGGGGAG	STREME-1	transcript_PVP01_1109100.1	3490	3497	.	8.58	GGGGGGAC
1-GGGGGGAG	STREME-1	transcript_PVP01_1232200.1	1020	1027	.	8.58	GGGGGGAC
1-GGGGGGAG	STREME-1	transcript_PVP01_0716800.1	1460	1467	.	8.58	GGGGGGAC
1-GGGGGGAG	STREME-1	transcript_PVP01_1234900.1	308	315	.	8.58	GGGGGGAC
1-GGGGGGAG	STREME-1	transcript_PVP01_1234900.1	2783	2790	.	8.58	GGGGGGAC
1-GGGGGGAG	STREME-1	transcript_PVP01_1122600.1	2190	2197	.	8.58	GGGGGGAC
1-GGGGGGAG	STREME-1	transcript_PVP01_1120600.1	905	912	.	8.58	GGGGGGAC
1-GGGGGGAG	STREME-1	transcript_PVP01_0728800.1	2216	2223	.	8.58	GGGGGGAC
1-GGGGGGAG	STREME-1	transcript_PVP01_0612300.1	1508	1515	.	8.58	GGGGGGAC
1-GGGGGGAG	STREME-1	transcript_PVP01_1012000.1	1019	1026	.	8.58	GGGGGGAC
1-GGGGGGAG	STREME-1	transcript_PVP01_1012000.1	3388	3395	.	8.58	GGGGGGAC
1-GGGGGGAG	STREME-1	transcript_PVP01_0942400.1	1409	1416	.	8.58	GGGGGGAC
1-GGGGGGAG	STREME-1	transcript_PVP01_1204100.1	1492	1499	.	8.58	GGGGGGAC
1-GGGGGGAG	STREME-1	transcript_PVP01_1303400.1	1329	1336	.	8.58	GGGGGGAC
1-GGGGGGAG	STREME-1	transcript_PVP01_1242500.1	3644	3651	.	8.58	GGGGGGAC
1-GGGGGGAG	STREME-1	transcript_PVP01_0725700.1	1344	1351	.	8.58	GGGGGGAC
1-GGGGGGAG	STREME-1	transcript_PVP01_0207300.1	2402	2409	.	8.58	GGGGGGAC
1-GGGGGGAG	STREME-1	transcript_PVP01_1433000.1	576	583	.	8.58	GGGGGGAC
1-GGGGGGAG	STREME-1	transcript_PVP01_1410600.1	1168	1175	.	8.58	GGGGGGAC
1-GGGGGGAG	STREME-1	transcript_PVP01_1462300.1	1153	1160	.	8.58	GGGGGGAC
1-GGGGGGAG	STREME-1	transcript_PVP01_1462300.1	3080	3087	.	8.58	GGGGGGAC
1-GGGGGGAG	STREME-1	transcript_PVP01_0728700.1	2681	2688	.	8.58	GGGGGGAC
1-GGGGGGAG	STREME-1	transcript_PVP01_0832600.1	1152	1159	.	8.58	GGGGGGAC
1-GGGGGGAG	STREME-1	transcript_PVP01_0705800.1	173	180	.	8.58	GGGGGGAC
1-GGGGGGAG	STREME-1	transcript_PVP01_1341700.1	2178	2185	.	8.58	GGGGGGAC
1-GGGGGGAG	STREME-1	transcript_PVP01_1326600.1	3093	3100	.	8.58	GGGGGGAC
1-GGGGGGAG	STREME-1	transcript_PVP01_0505900.1	2163	2170	.	8.58	GGGGGGAC
1-GGGGGGAG	STREME-1	transcript_PVP01_0944300.1	1725	1732	.	8.58	GGGGGGAC
1-GGGGGGAG	STREME-1	transcript_PVP01_1434500.1	3360	3367	.	8.58	GGGGGGAC
1-GGGGGGAG	STREME-1	transcript_PVP01_0508300.1	379	386	.	8.58	GGGGGGAU
1-GGGGGGAG	STREME-1	transcript_PVP01_0508300.1	2198	2205	.	8.58	GGGGGGAU
1-GGGGGGAG	STREME-1	transcript_PVP01_1449100.1	54	61	.	8.58	GGGGGGAU
1-GGGGGGAG	STREME-1	transcript_PVP01_1203200.1	1331	1338	.	8.58	GGGGGGAU
1-GGGGGGAG	STREME-1	transcript_PVP01_1442800.1	1139	1146	.	8.58	GGGGGGAU
1-GGGGGGAG	STREME-1	transcript_PVP01_0609600.1	761	768	.	8.58	GGGGGGAU
1-GGGGGGAG	STREME-1	transcript_PVP01_0609600.1	1528	1535	.	8.58	GGGGGGAU
1-GGGGGGAG	STREME-1	transcript_PVP01_0811200.1	3905	3912	.	8.58	GGGGGGAU
1-GGGGGGAG	STREME-1	transcript_PVP01_1437400.1	2864	2871	.	8.58	GGGGGGAU
1-GGGGGGAG	STREME-1	transcript_PVP01_1030900.1	2603	2610	.	8.58	GGGGGGAU
1-GGGGGGAG	STREME-1	transcript_PVP01_0923500.1	13896	13903	.	8.58	GGGGGGAU
1-GGGGGGAG	STREME-1	transcript_PVP01_0940100.1	3234	3241	.	8.58	GGGGGGAU
1-GGGGGGAG	STREME-1	transcript_PVP01_1115700.1	2221	2228	.	8.58	GGGGGGAU
1-GGGGGGAG	STREME-1	transcript_PVP01_1120200.1	3460	3467	.	8.58	GGGGGGAU
1-GGGGGGAG	STREME-1	transcript_PVP01_0725800.1	2363	2370	.	8.58	GGGGGGAU
1-GGGGGGAG	STREME-1	transcript_PVP01_0725800.1	2406	2413	.	8.58	GGGGGGAU
1-GGGGGGAG	STREME-1	transcript_PVP01_1440700.1	672	679	.	8.58	GGGGGGAU
1-GGGGGGAG	STREME-1	transcript_PVP01_1233000.1	3610	3617	.	8.58	GGGGGGAU
1-GGGGGGAG	STREME-1	transcript_PVP01_1209800.1	2366	2373	.	8.58	GGGGGGAU
1-GGGGGGAG	STREME-1	transcript_PVP01_0510300.1	1599	1606	.	8.58	GGGGGGAU
1-GGGGGGAG	STREME-1	transcript_PVP01_0106800.1	1141	1148	.	8.58	GGGGGGAU
1-GGGGGGAG	STREME-1	transcript_PVP01_0106800.1	1278	1285	.	8.58	GGGGGGAU
1-GGGGGGAG	STREME-1	transcript_PVP01_1431100.1	1776	1783	.	8.58	GGGGGGAU
1-GGGGGGAG	STREME-1	transcript_PVP01_1241000.1	9670	9677	.	8.58	GGGGGGAU
1-GGGGGGAG	STREME-1	transcript_PVP01_0815700.1	1690	1697	.	8.58	GGGGGGAU
1-GGGGGGAG	STREME-1	transcript_PVP01_1216300.1	1110	1117	.	8.58	GGGGGGAU
1-GGGGGGAG	STREME-1	transcript_PVP01_0703600.1	1759	1766	.	8.58	GGGGGGAU
1-GGGGGGAG	STREME-1	transcript_PVP01_1318200.1	674	681	.	8.58	GGGGGGAU
1-GGGGGGAG	STREME-1	transcript_PVP01_0805400.1	2891	2898	.	8.58	GGGGGGAU
1-GGGGGGAG	STREME-1	transcript_PVP01_0706400.1	1388	1395	.	8.58	GGGGGGAU
1-GGGGGGAG	STREME-1	transcript_PVP01_0912400.1	4254	4261	.	8.58	GGGGGGAU
1-GGGGGGAG	STREME-1	transcript_PVP01_0912400.1	4381	4388	.	8.58	GGGGGGAU
1-GGGGGGAG	STREME-1	transcript_PVP01_1407400.1	1293	1300	.	8.58	GGGGGGAU
1-GGGGGGAG	STREME-1	transcript_PVP01_1407400.1	8565	8572	.	8.58	GGGGGGAU
1-GGGGGGAG	STREME-1	transcript_PVP01_1209600.1	343	350	.	8.58	GGGGGGAU
1-GGGGGGAG	STREME-1	transcript_PVP01_1247900.1	1131	1138	.	8.58	GGGGGGAU
1-GGGGGGAG	STREME-1	transcript_PVP01_1253100.1	421	428	.	8.58	GGGGGGAU
1-GGGGGGAG	STREME-1	transcript_PVP01_1020600.1	1359	1366	.	8.58	GGGGGGAU
1-GGGGGGAG	STREME-1	transcript_PVP01_0527800.1	1712	1719	.	8.58	GGGGGGAU
1-GGGGGGAG	STREME-1	transcript_PVP01_1301800.1	627	634	.	8.58	GGGGGGAU
1-GGGGGGAG	STREME-1	transcript_PVP01_0945500.1	1116	1123	.	8.58	GGGGGGAU
1-GGGGGGAG	STREME-1	transcript_PVP01_0945500.1	2165	2172	.	8.58	GGGGGGAU
1-GGGGGGAG	STREME-1	transcript_PVP01_0945500.1	2900	2907	.	8.58	GGGGGGAU
1-GGGGGGAG	STREME-1	transcript_PVP01_0313700.1	1160	1167	.	8.58	GGGGGGAU
1-GGGGGGAG	STREME-1	transcript_PVP01_1011000.1	7337	7344	.	8.58	GGGGGGAU
1-GGGGGGAG	STREME-1	transcript_PVP01_1231600.1	487	494	.	8.58	GGGGGGAU
1-GGGGGGAG	STREME-1	transcript_PVP01_0512700.1	132	139	.	8.58	GGGGGGAU
1-GGGGGGAG	STREME-1	transcript_PVP01_0817600.1	2403	2410	.	8.58	GGGGGGAU
1-GGGGGGAG	STREME-1	transcript_PVP01_0817600.1	4017	4024	.	8.58	GGGGGGAU
1-GGGGGGAG	STREME-1	transcript_PVP01_1405700.1	6299	6306	.	8.58	GGGGGGAU
1-GGGGGGAG	STREME-1	transcript_PVP01_0834400.1	3355	3362	.	8.58	GGGGGGAU
1-GGGGGGAG	STREME-1	transcript_PVP01_0507300.1	1076	1083	.	8.58	GGGGGGAU
1-GGGGGGAG	STREME-1	transcript_PVP01_1103200.1	254	261	.	8.58	GGGGGGAU
1-GGGGGGAG	STREME-1	transcript_PVP01_1220800.1	2715	2722	.	8.58	GGGGGGAU
1-GGGGGGAG	STREME-1	transcript_PVP01_1341100.1	313	320	.	8.58	GGGGGGAU
1-GGGGGGAG	STREME-1	transcript_PVP01_1341100.1	3487	3494	.	8.58	GGGGGGAU
1-GGGGGGAG	STREME-1	transcript_PVP01_1339200.1	3108	3115	.	8.58	GGGGGGAU
1-GGGGGGAG	STREME-1	transcript_PVP01_1261700.1	1633	1640	.	8.58	GGGGGGAU
1-GGGGGGAG	STREME-1	transcript_PVP01_1411100.1	2676	2683	.	8.58	GGGGGGAU
1-GGGGGGAG	STREME-1	transcript_PVP01_1411800.1	2812	2819	.	8.58	GGGGGGAU
1-GGGGGGAG	STREME-1	transcript_PVP01_0705200.1	2082	2089	.	8.58	GGGGGGAU
1-GGGGGGAG	STREME-1	transcript_PVP01_0830300.1	740	747	.	8.58	GGGGGGAU
1-GGGGGGAG	STREME-1	transcript_PVP01_0830300.1	2987	2994	.	8.58	GGGGGGAU
1-GGGGGGAG	STREME-1	transcript_PVP01_1305200.1	971	978	.	8.58	GGGGGGAU
1-GGGGGGAG	STREME-1	transcript_PVP01_1314300.1	1905	1912	.	8.58	GGGGGGAU
1-GGGGGGAG	STREME-1	transcript_PVP01_1315800.1	3110	3117	.	8.58	GGGGGGAU
1-GGGGGGAG	STREME-1	transcript_PVP01_1315800.1	5248	5255	.	8.58	GGGGGGAU
1-GGGGGGAG	STREME-1	transcript_PVP01_1109000.1	1538	1545	.	8.58	GGGGGGAU
1-GGGGGGAG	STREME-1	transcript_PVP01_0517000.1	3381	3388	.	8.58	GGGGGGAU
1-GGGGGGAG	STREME-1	transcript_PVP01_1146400.1	962	969	.	8.58	GGGGGGAU
1-GGGGGGAG	STREME-1	transcript_PVP01_1301300.1	2287	2294	.	8.58	GGGGGGAU
1-GGGGGGAG	STREME-1	transcript_PVP01_1466100.1	928	935	.	8.58	GGGGGGAU
1-GGGGGGAG	STREME-1	transcript_PVP01_1342200.1	2979	2986	.	8.58	GGGGGGAU
1-GGGGGGAG	STREME-1	transcript_PVP01_1464900.1	338	345	.	8.58	GGGGGGAU
1-GGGGGGAG	STREME-1	transcript_PVP01_1464900.1	1913	1920	.	8.58	GGGGGGAU
1-GGGGGGAG	STREME-1	transcript_PVP01_1009800.1	1890	1897	.	8.58	GGGGGGAU
1-GGGGGGAG	STREME-1	transcript_PVP01_1021100.1	3433	3440	.	8.58	GGGGGGAU
1-GGGGGGAG	STREME-1	transcript_PVP01_1022100.1	130	137	.	8.58	GGGGGGAU
1-GGGGGGAG	STREME-1	transcript_PVP01_0106900.1	3148	3155	.	8.58	GGGGGGAU
1-GGGGGGAG	STREME-1	transcript_PVP01_0940200.1	1355	1362	.	8.58	GGGGGGAU
1-GGGGGGAG	STREME-1	transcript_PVP01_0530200.1	961	968	.	8.58	GGGGGGAU
1-GGGGGGAG	STREME-1	transcript_PVP01_0530200.1	3260	3267	.	8.58	GGGGGGAU
1-GGGGGGAG	STREME-1	transcript_PVP01_0530200.1	4130	4137	.	8.58	GGGGGGAU
1-GGGGGGAG	STREME-1	transcript_PVP01_0520400.1	3339	3346	.	8.58	GGGGGGAU
1-GGGGGGAG	STREME-1	transcript_PVP01_0728800.1	320	327	.	8.58	GGGGGGAU
1-GGGGGGAG	STREME-1	transcript_PVP01_0612300.1	982	989	.	8.58	GGGGGGAU
1-GGGGGGAG	STREME-1	transcript_PVP01_0922400.1	2371	2378	.	8.58	GGGGGGAU
1-GGGGGGAG	STREME-1	transcript_PVP01_0725100.1	2214	2221	.	8.58	GGGGGGAU
1-GGGGGGAG	STREME-1	transcript_PVP01_1456200.1	2087	2094	.	8.58	GGGGGGAU
1-GGGGGGAG	STREME-1	transcript_PVP01_0947400.1	2170	2177	.	8.58	GGGGGGAU
1-GGGGGGAG	STREME-1	transcript_PVP01_1462300.1	1758	1765	.	8.58	GGGGGGAU
1-GGGGGGAG	STREME-1	transcript_PVP01_0941200.1	3368	3375	.	8.58	GGGGGGAU
1-GGGGGGAG	STREME-1	transcript_PVP01_1023700.1	2490	2497	.	8.58	GGGGGGAU
1-GGGGGGAG	STREME-1	transcript_PVP01_1465500.1	1421	1428	.	8.58	GGGGGGAU
[truncated: 16,034 more rows]

## Sheet: Streme_results_Gural_schizonts
motif_ID	motif_ALT_ID	seq_ID	site_Start	site_End	site_Strand	site_Score	site_Sequence
1-CAASAGCAAC	STREME-1	cds_PVP01_1421500.1	57	66	.	16.28	CAAGAUCAAC
1-CAASAGCAAC	STREME-1	cds_PVP01_0417000.1	2944	2953	.	16.28	CAAGAUCAAC
1-CAASAGCAAC	STREME-1	cds_PVP01_1340300.1	6093	6102	.	16.28	CAAGAUCAAC
1-CAASAGCAAC	STREME-1	cds_PVP01_1325700.1	300	309	.	16.28	CAAGAUCAAC
1-CAASAGCAAC	STREME-1	cds_PVP01_1319600.1	3928	3937	.	16.28	CAAGAUCAAC
1-CAASAGCAAC	STREME-1	cds_PVP01_1413100.1	432	441	.	16.12	CAACAGCAAC
1-CAASAGCAAC	STREME-1	cds_PVP01_1132900.1	330	339	.	16.12	CAACAGCAAC
1-CAASAGCAAC	STREME-1	cds_PVP01_1249000.1	2370	2379	.	16.12	CAACAGCAAC
1-CAASAGCAAC	STREME-1	cds_PVP01_0931500.1	2028	2037	.	16.12	CAACAGCAAC
1-CAASAGCAAC	STREME-1	cds_PVP01_0106700.1	4557	4566	.	16.12	CAACAGCAAC
1-CAASAGCAAC	STREME-1	cds_PVP01_1022500.1	34092	34101	.	16.12	CAACAGCAAC
1-CAASAGCAAC	STREME-1	cds_PVP01_1022500.1	34098	34107	.	16.12	CAACAGCAAC
1-CAASAGCAAC	STREME-1	cds_PVP01_1022500.1	34104	34113	.	16.12	CAACAGCAAC
1-CAASAGCAAC	STREME-1	cds_PVP01_1022500.1	34122	34131	.	16.12	CAACAGCAAC
1-CAASAGCAAC	STREME-1	cds_PVP01_1022500.1	34128	34137	.	16.12	CAACAGCAAC
1-CAASAGCAAC	STREME-1	cds_PVP01_1022500.1	34134	34143	.	16.12	CAACAGCAAC
1-CAASAGCAAC	STREME-1	cds_PVP01_1022500.1	34140	34149	.	16.12	CAACAGCAAC
1-CAASAGCAAC	STREME-1	cds_PVP01_1022500.1	34146	34155	.	16.12	CAACAGCAAC
1-CAASAGCAAC	STREME-1	cds_PVP01_1022500.1	34152	34161	.	16.12	CAACAGCAAC
1-CAASAGCAAC	STREME-1	cds_PVP01_1022500.1	34158	34167	.	16.12	CAACAGCAAC
1-CAASAGCAAC	STREME-1	cds_PVP01_0104700.1	156	165	.	16.12	CAACAGCAAC
1-CAASAGCAAC	STREME-1	cds_PVP01_0104300.1	3258	3267	.	16.12	CAACAGCAAC
1-CAASAGCAAC	STREME-1	cds_PVP01_1226100.1	354	363	.	16.12	CAACAGCAAC
1-CAASAGCAAC	STREME-1	cds_PVP01_1226100.1	360	369	.	16.12	CAACAGCAAC
1-CAASAGCAAC	STREME-1	cds_PVP01_1226100.1	366	375	.	16.12	CAACAGCAAC
1-CAASAGCAAC	STREME-1	cds_PVP01_1033900.1	2179	2188	.	16.12	CAACAGCAAC
1-CAASAGCAAC	STREME-1	cds_PVP01_1225200.1	1515	1524	.	16.12	CAACAGCAAC
1-CAASAGCAAC	STREME-1	cds_PVP01_1404400.1	4275	4284	.	16.12	CAACAGCAAC
1-CAASAGCAAC	STREME-1	cds_PVP01_0814700.1	5860	5869	.	16.12	CAACAGCAAC
1-CAASAGCAAC	STREME-1	cds_PVP01_1313800.1	2382	2391	.	16.12	CAACAGCAAC
1-CAASAGCAAC	STREME-1	cds_PVP01_1267500.1	1026	1035	.	16.12	CAACAGCAAC
1-CAASAGCAAC	STREME-1	cds_PVP01_1466800.1	2049	2058	.	16.12	CAACAGCAAC
1-CAASAGCAAC	STREME-1	cds_PVP01_0721700.1	2115	2124	.	16.12	CAACAGCAAC
1-CAASAGCAAC	STREME-1	cds_PVP01_1447000.1	2970	2979	.	16.12	CAACAGCAAC
1-CAASAGCAAC	STREME-1	cds_PVP01_0918000.1	758	767	.	16.12	CAACAGCAAC
1-CAASAGCAAC	STREME-1	cds_PVP01_0924100.1	3585	3594	.	16.12	CAACAGCAAC
1-CAASAGCAAC	STREME-1	cds_PVP01_0208000.1	110	119	.	16.12	CAACAGCAAC
1-CAASAGCAAC	STREME-1	cds_PVP01_0802800.1	2490	2499	.	16.12	CAACAGCAAC
1-CAASAGCAAC	STREME-1	cds_PVP01_0320400.1	9129	9138	.	16.12	CAACAGCAAC
1-CAASAGCAAC	STREME-1	cds_PVP01_1211100.1	72	81	.	16.12	CAACAGCAAC
1-CAASAGCAAC	STREME-1	cds_PVP01_1442500.1	2251	2260	.	16.12	CAACAGCAAC
1-CAASAGCAAC	STREME-1	cds_PVP01_1137600.1	63	72	.	16.12	CAACAGCAAC
1-CAASAGCAAC	STREME-1	cds_PVP01_0726100.1	1602	1611	.	16.12	CAACAGCAAC
1-CAASAGCAAC	STREME-1	cds_PVP01_1131500.1	707	716	.	16.12	CAACAGCAAC
1-CAASAGCAAC	STREME-1	cds_PVP01_1306100.1	4995	5004	.	16.12	CAACAGCAAC
1-CAASAGCAAC	STREME-1	cds_PVP01_1308000.1	324	333	.	16.12	CAACAGCAAC
1-CAASAGCAAC	STREME-1	cds_PVP01_1325700.1	517	526	.	16.12	CAACAGCAAC
1-CAASAGCAAC	STREME-1	cds_PVP01_1110900.1	385	394	.	16.12	CAACAGCAAC
1-CAASAGCAAC	STREME-1	cds_PVP01_0723600.1	969	978	.	16.12	CAACAGCAAC
1-CAASAGCAAC	STREME-1	cds_PVP01_1144400.1	3555	3564	.	16.12	CAACAGCAAC
1-CAASAGCAAC	STREME-1	cds_PVP01_1316100.1	11610	11619	.	15.94	CAAGAGCAAC
1-CAASAGCAAC	STREME-1	cds_PVP01_1022500.1	18387	18396	.	15.94	CAAGAGCAAC
1-CAASAGCAAC	STREME-1	cds_PVP01_1022500.1	30486	30495	.	15.94	CAAGAGCAAC
1-CAASAGCAAC	STREME-1	cds_PVP01_0731500.1	3902	3911	.	15.94	CAAGAGCAAC
1-CAASAGCAAC	STREME-1	cds_PVP01_1422300.1	894	903	.	15.94	CAAGAGCAAC
1-CAASAGCAAC	STREME-1	cds_PVP01_1118400.1	282	291	.	15.94	CAAGAGCAAC
1-CAASAGCAAC	STREME-1	cds_PVP01_1139300.1	3626	3635	.	15.94	CAAGAGCAAC
1-CAASAGCAAC	STREME-1	cds_PVP01_1033900.1	2431	2440	.	15.94	CAAGAGCAAC
1-CAASAGCAAC	STREME-1	cds_PVP01_1033900.1	2455	2464	.	15.94	CAAGAGCAAC
1-CAASAGCAAC	STREME-1	cds_PVP01_1238700.1	876	885	.	15.94	CAAGAGCAAC
1-CAASAGCAAC	STREME-1	cds_PVP01_0814700.1	5934	5943	.	15.94	CAAGAGCAAC
1-CAASAGCAAC	STREME-1	cds_PVP01_1023900.1	3033	3042	.	15.94	CAAGAGCAAC
1-CAASAGCAAC	STREME-1	cds_PVP01_1316000.1	948	957	.	15.94	CAAGAGCAAC
1-CAASAGCAAC	STREME-1	cds_PVP01_0723000.1	612	621	.	15.94	CAAGAGCAAC
1-CAASAGCAAC	STREME-1	cds_PVP01_0835000.1	2613	2622	.	15.94	CAAGAGCAAC
1-CAASAGCAAC	STREME-1	cds_PVP01_1408600.1	555	564	.	15.94	CAAGAGCAAC
1-CAASAGCAAC	STREME-1	cds_PVP01_1123500.1	771	780	.	15.94	CAAGAGCAAC
1-CAASAGCAAC	STREME-1	cds_PVP01_0212100.1	4	13	.	15.73	CAACAUCAAC
1-CAASAGCAAC	STREME-1	cds_PVP01_0311300.1	3636	3645	.	15.73	CAACAUCAAC
1-CAASAGCAAC	STREME-1	cds_PVP01_0928700.1	6504	6513	.	15.73	CAACAUCAAC
1-CAASAGCAAC	STREME-1	cds_PVP01_0731500.1	15	24	.	15.73	CAACAUCAAC
1-CAASAGCAAC	STREME-1	cds_PVP01_0731500.1	404	413	.	15.73	CAACAUCAAC
1-CAASAGCAAC	STREME-1	cds_PVP01_1421500.1	1605	1614	.	15.73	CAACAUCAAC
1-CAASAGCAAC	STREME-1	cds_PVP01_1445400.1	5481	5490	.	15.73	CAACAUCAAC
1-CAASAGCAAC	STREME-1	cds_PVP01_0305300.1	8	17	.	15.73	CAACAUCAAC
1-CAASAGCAAC	STREME-1	cds_PVP01_0715400.1	1980	1989	.	15.73	CAACAUCAAC
1-CAASAGCAAC	STREME-1	cds_PVP01_1313800.1	1779	1788	.	15.73	CAACAUCAAC
1-CAASAGCAAC	STREME-1	cds_PVP01_1011500.1	20267	20276	.	15.73	CAACAUCAAC
1-CAASAGCAAC	STREME-1	cds_PVP01_1119800.1	390	399	.	15.73	CAACAUCAAC
1-CAASAGCAAC	STREME-1	cds_PVP01_0320400.1	7245	7254	.	15.73	CAACAUCAAC
1-CAASAGCAAC	STREME-1	cds_PVP01_1137400.1	3609	3618	.	15.73	CAACAUCAAC
1-CAASAGCAAC	STREME-1	cds_PVP01_0005760.1	344	353	.	15.73	CAACAUCAAC
1-CAASAGCAAC	STREME-1	cds_PVP01_0832500.1	4848	4857	.	15.73	CAACAUCAAC
1-CAASAGCAAC	STREME-1	cds_PVP01_0920000.1	4866	4875	.	15.73	CAACAUCAAC
1-CAASAGCAAC	STREME-1	cds_PVP01_0316400.1	687	696	.	15.73	CAACAUCAAC
1-CAASAGCAAC	STREME-1	cds_PVP01_0529800.1	5175	5184	.	15.73	CAAUAGCAAC
1-CAASAGCAAC	STREME-1	cds_PVP01_1260500.1	1572	1581	.	15.73	CAAUAGCAAC
1-CAASAGCAAC	STREME-1	cds_PVP01_1216000.1	1599	1608	.	15.73	CAAUAGCAAC
1-CAASAGCAAC	STREME-1	cds_PVP01_1404700.1	20376	20385	.	15.73	CAAUAGCAAC
1-CAASAGCAAC	STREME-1	cds_PVP01_1404700.1	20394	20403	.	15.73	CAAUAGCAAC
1-CAASAGCAAC	STREME-1	cds_PVP01_1316000.1	4056	4065	.	15.73	CAAUAGCAAC
1-CAASAGCAAC	STREME-1	cds_PVP01_1024200.1	2904	2913	.	15.73	CAAUAGCAAC
1-CAASAGCAAC	STREME-1	cds_PVP01_0729100.1	2299	2308	.	15.73	CAAUAGCAAC
1-CAASAGCAAC	STREME-1	cds_PVP01_0106700.1	4833	4842	.	15.2	CGACAGCAAC
1-CAASAGCAAC	STREME-1	cds_PVP01_1139300.1	3213	3222	.	15.2	CGACAGCAAC
1-CAASAGCAAC	STREME-1	cds_PVP01_0812300.1	201	210	.	15.2	CGACAGCAAC
1-CAASAGCAAC	STREME-1	cds_PVP01_0604700.1	2368	2377	.	15.2	CGACAGCAAC
1-CAASAGCAAC	STREME-1	cds_PVP01_0832500.1	4635	4644	.	15.2	CGACAGCAAC
1-CAASAGCAAC	STREME-1	cds_PVP01_0606100.1	296	305	.	15.2	CGACAGCAAC
1-CAASAGCAAC	STREME-1	cds_PVP01_0603500.1	738	747	.	15.2	CGACAGCAAC
1-CAASAGCAAC	STREME-1	cds_PVP01_1319200.1	279	288	.	15.2	CGACAGCAAC
1-CAASAGCAAC	STREME-1	cds_PVP01_0920000.1	5349	5358	.	15.2	CGACAGCAAC
1-CAASAGCAAC	STREME-1	cds_PVP01_1319600.1	2890	2899	.	15.2	CGACAGCAAC
1-CAASAGCAAC	STREME-1	cds_PVP01_0520500.1	3482	3491	.	15.03	CGAGAUCAAC
1-CAASAGCAAC	STREME-1	cds_PVP01_0834700.1	11037	11046	.	15.03	CGAGAUCAAC
1-CAASAGCAAC	STREME-1	cds_PVP01_0613100.1	606	615	.	15.03	CGAGAUCAAC
1-CAASAGCAAC	STREME-1	cds_PVP01_0922500.1	810	819	.	14.93	CGAUAGCAAC
1-CAASAGCAAC	STREME-1	cds_PVP01_0922500.1	819	828	.	14.93	CGAUAGCAAC
1-CAASAGCAAC	STREME-1	cds_PVP01_1469200.1	5313	5322	.	14.93	CGAUAGCAAC
1-CAASAGCAAC	STREME-1	cds_PVP01_0004320.1	954	963	.	14.93	CGAUAGCAAC
1-CAASAGCAAC	STREME-1	cds_PVP01_0315600.1	2118	2127	.	14.93	CGAUAGCAAC
1-CAASAGCAAC	STREME-1	cds_PVP01_1404700.1	8163	8172	.	14.93	CGAUAGCAAC
1-CAASAGCAAC	STREME-1	cds_PVP01_1310500.1	500	509	.	14.93	CGAUAGCAAC
1-CAASAGCAAC	STREME-1	cds_PVP01_0311400.1	144	153	.	14.93	CGAUAGCAAC
1-CAASAGCAAC	STREME-1	cds_PVP01_1340300.1	8919	8928	.	14.93	CGAUAGCAAC
1-CAASAGCAAC	STREME-1	cds_PVP01_1339500.1	1423	1432	.	14.93	CGAUAGCAAC
1-CAASAGCAAC	STREME-1	cds_PVP01_0405000.1	4766	4775	.	14.93	CGAUAGCAAC
1-CAASAGCAAC	STREME-1	cds_PVP01_0801500.1	144	153	.	14.93	CGAUAGCAAC
1-CAASAGCAAC	STREME-1	cds_PVP01_1124900.1	3075	3084	.	14.93	CGAUAGCAAC
1-CAASAGCAAC	STREME-1	cds_PVP01_0731500.1	9	18	.	14.81	CGACAUCAAC
1-CAASAGCAAC	STREME-1	cds_PVP01_1464600.1	51	60	.	14.81	CGACAUCAAC
1-CAASAGCAAC	STREME-1	cds_PVP01_1422300.1	1137	1146	.	14.81	CGACAUCAAC
1-CAASAGCAAC	STREME-1	cds_PVP01_0410000.1	713	722	.	14.81	CGACAUCAAC
1-CAASAGCAAC	STREME-1	cds_PVP01_0804000.1	1692	1701	.	14.81	CGACAUCAAC
1-CAASAGCAAC	STREME-1	cds_PVP01_0520500.1	2460	2469	.	14.81	CGACAUCAAC
1-CAASAGCAAC	STREME-1	cds_PVP01_0104800.1	4752	4761	.	14.81	CGACAUCAAC
1-CAASAGCAAC	STREME-1	cds_PVP01_1445600.1	1254	1263	.	14.81	CGACAUCAAC
1-CAASAGCAAC	STREME-1	cds_PVP01_1212200.1	12	21	.	14.81	CGACAUCAAC
1-CAASAGCAAC	STREME-1	cds_PVP01_1260300.1	726	735	.	14.81	CGACAUCAAC
1-CAASAGCAAC	STREME-1	cds_PVP01_1447300.1	1044	1053	.	14.81	CGACAUCAAC
1-CAASAGCAAC	STREME-1	cds_PVP01_1253800.1	2387	2396	.	14.81	CGACAUCAAC
1-CAASAGCAAC	STREME-1	cds_PVP01_0611100.1	898	907	.	14.81	CGACAUCAAC
1-CAASAGCAAC	STREME-1	cds_PVP01_1316100.1	6831	6840	.	14.7	CGAGAGCAAC
1-CAASAGCAAC	STREME-1	cds_PVP01_1458300.1	3937	3946	.	14.7	CGAGAGCAAC
1-CAASAGCAAC	STREME-1	cds_PVP01_0307000.1	3972	3981	.	14.7	CGAGAGCAAC
1-CAASAGCAAC	STREME-1	cds_PVP01_0818800.1	171	180	.	14.7	CGAGAGCAAC
1-CAASAGCAAC	STREME-1	cds_PVP01_1208400.1	1728	1737	.	14.7	CGAGAGCAAC
1-CAASAGCAAC	STREME-1	cds_PVP01_0818400.1	2769	2778	.	14.7	CGAGAGCAAC
1-CAASAGCAAC	STREME-1	cds_PVP01_0923700.1	975	984	.	14.7	CGAGAGCAAC
1-CAASAGCAAC	STREME-1	cds_PVP01_1203100.1	1607	1616	.	14.7	CGAGAGCAAC
1-CAASAGCAAC	STREME-1	cds_PVP01_0307100.1	4677	4686	.	14.7	CGAGAGCAAC
1-CAASAGCAAC	STREME-1	cds_PVP01_1301900.1	5784	5793	.	14.7	CGAGAGCAAC
1-CAASAGCAAC	STREME-1	cds_PVP01_0936900.1	1221	1230	.	14.7	CGAGAGCAAC
1-CAASAGCAAC	STREME-1	cds_PVP01_0513800.1	375	384	.	14.7	CGAGAGCAAC
1-CAASAGCAAC	STREME-1	cds_PVP01_0216800.1	1946	1955	.	14.62	CUAGAUCAAC
1-CAASAGCAAC	STREME-1	cds_PVP01_1026500.1	1213	1222	.	14.62	CUAGAUCAAC
1-CAASAGCAAC	STREME-1	cds_PVP01_0727900.1	2736	2745	.	14.58	CAAUAUCAAC
1-CAASAGCAAC	STREME-1	cds_PVP01_1119800.1	2976	2985	.	14.58	CAAUAUCAAC
1-CAASAGCAAC	STREME-1	cds_PVP01_0715700.1	696	705	.	14.58	CAAUAUCAAC
1-CAASAGCAAC	STREME-1	cds_PVP01_0712800.1	157	166	.	14.29	CUAGAGCAAC
1-CAASAGCAAC	STREME-1	cds_PVP01_1031100.1	1162	1171	.	14.29	CUAGAGCAAC
1-CAASAGCAAC	STREME-1	cds_PVP01_0213800.1	4911	4920	.	14.12	CAACAGCUAC
1-CAASAGCAAC	STREME-1	cds_PVP01_1144800.1	5613	5622	.	14.12	CAACAGCUAC
1-CAASAGCAAC	STREME-1	cds_PVP01_1145100.1	1323	1332	.	14.12	CAACAGCUAC
1-CAASAGCAAC	STREME-1	cds_PVP01_1225400.1	4869	4878	.	14.12	CAACAGCUAC
1-CAASAGCAAC	STREME-1	cds_PVP01_1469600.1	337	346	.	14.12	CAACAGCUAC
1-CAASAGCAAC	STREME-1	cds_PVP01_1025100.1	7737	7746	.	14.12	CAACAGCUAC
1-CAASAGCAAC	STREME-1	cds_PVP01_0319100.1	4326	4335	.	14.12	CAACAGCUAC
1-CAASAGCAAC	STREME-1	cds_PVP01_0606900.1	1018	1027	.	14.12	CAACAGCUAC
1-CAASAGCAAC	STREME-1	cds_PVP01_0942800.1	6876	6885	.	14.12	CAACAGCUAC
1-CAASAGCAAC	STREME-1	cds_PVP01_0936900.1	9381	9390	.	14.12	CAACAGCUAC
1-CAASAGCAAC	STREME-1	cds_PVP01_1305900.1	1959	1968	.	14.12	CAACAGCUAC
1-CAASAGCAAC	STREME-1	cds_PVP01_1123500.1	576	585	.	14.12	CAACAGCUAC
1-CAASAGCAAC	STREME-1	cds_PVP01_0931500.1	1245	1254	.	13.94	CAAGAGCUAC
1-CAASAGCAAC	STREME-1	cds_PVP01_0311300.1	4647	4656	.	13.94	CAAGAGCUAC
1-CAASAGCAAC	STREME-1	cds_PVP01_0925500.1	648	657	.	13.94	CAAGAGCUAC
1-CAASAGCAAC	STREME-1	cds_PVP01_1022500.1	5484	5493	.	13.94	CAAGAGCUAC
1-CAASAGCAAC	STREME-1	cds_PVP01_1328700.1	378	387	.	13.94	CAAGAGCUAC
1-CAASAGCAAC	STREME-1	cds_PVP01_0216700.1	141	150	.	13.94	CAAGAGCUAC
1-CAASAGCAAC	STREME-1	cds_PVP01_1316000.1	747	756	.	13.94	CAAGAGCUAC
1-CAASAGCAAC	STREME-1	cds_PVP01_0410100.1	71	80	.	13.94	CAAGAGCUAC
1-CAASAGCAAC	STREME-1	cds_PVP01_0320400.1	4744	4753	.	13.94	CAAGAGCUAC
1-CAASAGCAAC	STREME-1	cds_PVP01_0513800.1	1371	1380	.	13.94	CAAGAGCUAC
1-CAASAGCAAC	STREME-1	cds_PVP01_1255000.1	4554	4563	.	13.94	CAAGAGCUAC
1-CAASAGCAAC	STREME-1	cds_PVP01_0924600.1	648	657	.	13.92	CAAGAUCAUC
1-CAASAGCAAC	STREME-1	cds_PVP01_0616500.1	2871	2880	.	13.92	CAAGAUCAUC
1-CAASAGCAAC	STREME-1	cds_PVP01_0913800.1	12312	12321	.	13.88	CAAGAUCUAC
1-CAASAGCAAC	STREME-1	cds_PVP01_1023900.1	7314	7323	.	13.88	CAAGAUCUAC
1-CAASAGCAAC	STREME-1	cds_PVP01_0534300.1	6177	6186	.	13.88	CAAGAUCUAC
1-CAASAGCAAC	STREME-1	cds_PVP01_1030000.1	4540	4549	.	13.88	CAAGAUCUAC
1-CAASAGCAAC	STREME-1	cds_PVP01_0821200.1	2025	2034	.	13.88	CAAGAUCUAC
1-CAASAGCAAC	STREME-1	cds_PVP01_1133600.1	27	36	.	13.88	CAAGAUCUAC
1-CAASAGCAAC	STREME-1	cds_PVP01_1135200.1	2250	2259	.	13.88	CACUAGCAAC
1-CAASAGCAAC	STREME-1	cds_PVP01_1017200.1	5793	5802	.	13.78	CGAUAUCAAC
1-CAASAGCAAC	STREME-1	cds_PVP01_1313500.1	678	687	.	13.78	CGAUAUCAAC
1-CAASAGCAAC	STREME-1	cds_PVP01_0931900.1	1002	1011	.	13.78	CGAUAUCAAC
1-CAASAGCAAC	STREME-1	cds_PVP01_0935300.1	1524	1533	.	13.77	CAACAGCAUC
1-CAASAGCAAC	STREME-1	cds_PVP01_1316100.1	11562	11571	.	13.77	CAACAGCAUC
1-CAASAGCAAC	STREME-1	cds_PVP01_0415200.1	1980	1989	.	13.77	CAACAGCAUC
1-CAASAGCAAC	STREME-1	cds_PVP01_1456500.1	199	208	.	13.77	CAACAGCAUC
1-CAASAGCAAC	STREME-1	cds_PVP01_1464600.1	1491	1500	.	13.77	CAACAGCAUC
1-CAASAGCAAC	STREME-1	cds_PVP01_0104300.1	8397	8406	.	13.77	CAACAGCAUC
1-CAASAGCAAC	STREME-1	cds_PVP01_0512500.1	272	281	.	13.77	CAACAGCAUC
1-CAASAGCAAC	STREME-1	cds_PVP01_1211000.1	20304	20313	.	13.77	CAACAGCAUC
1-CAASAGCAAC	STREME-1	cds_PVP01_1121400.1	11376	11385	.	13.77	CAACAGCAUC
1-CAASAGCAAC	STREME-1	cds_PVP01_1316000.1	1080	1089	.	13.77	CAACAGCAUC
1-CAASAGCAAC	STREME-1	cds_PVP01_1320900.1	1420	1429	.	13.77	CAACAGCAUC
1-CAASAGCAAC	STREME-1	cds_PVP01_1119800.1	10990	10999	.	13.77	CAACAGCAUC
1-CAASAGCAAC	STREME-1	cds_PVP01_0623800.1	1027	1036	.	13.77	CAACAGCAUC
1-CAASAGCAAC	STREME-1	cds_PVP01_0942800.1	259	268	.	13.77	CAACAGCAUC
1-CAASAGCAAC	STREME-1	cds_PVP01_1445800.1	2220	2229	.	13.77	CAACAGCAUC
1-CAASAGCAAC	STREME-1	cds_PVP01_0906100.1	1129	1138	.	13.77	CAACAGCAUC
1-CAASAGCAAC	STREME-1	cds_PVP01_1217200.1	144	153	.	13.77	CAACAGCAUC
1-CAASAGCAAC	STREME-1	cds_PVP01_1271400.1	1081	1090	.	13.77	CAACAGCAUC
1-CAASAGCAAC	STREME-1	cds_PVP01_0723600.1	888	897	.	13.77	CAACAGCAUC
1-CAASAGCAAC	STREME-1	cds_PVP01_1262500.1	2757	2766	.	13.77	CAACAGCAUC
1-CAASAGCAAC	STREME-1	cds_PVP01_0529800.1	570	579	.	13.73	CAAUAGCUAC
1-CAASAGCAAC	STREME-1	cds_PVP01_0609100.1	750	759	.	13.73	CAAUAGCUAC
1-CAASAGCAAC	STREME-1	cds_PVP01_0703700.1	5547	5556	.	13.73	CAAUAGCUAC
1-CAASAGCAAC	STREME-1	cds_PVP01_1121400.1	21447	21456	.	13.73	CAAUAGCUAC
1-CAASAGCAAC	STREME-1	cds_PVP01_1124500.1	739	748	.	13.73	CAAUAGCUAC
1-CAASAGCAAC	STREME-1	cds_PVP01_1445800.1	1011	1020	.	13.73	CAAUAGCUAC
1-CAASAGCAAC	STREME-1	cds_PVP01_1209200.1	1095	1104	.	13.73	CAAUAGCUAC
1-CAASAGCAAC	STREME-1	cds_PVP01_0927400.1	2754	2763	.	13.73	CAAUAGCUAC
1-CAASAGCAAC	STREME-1	cds_PVP01_1255000.1	3474	3483	.	13.73	CAAUAGCUAC
1-CAASAGCAAC	STREME-1	cds_PVP01_0529800.1	8752	8761	.	13.69	CAACUGCAAC
1-CAASAGCAAC	STREME-1	cds_PVP01_0529800.1	8758	8767	.	13.69	CAACUGCAAC
1-CAASAGCAAC	STREME-1	cds_PVP01_0529800.1	8764	8773	.	13.69	CAACUGCAAC
1-CAASAGCAAC	STREME-1	cds_PVP01_0529800.1	8770	8779	.	13.69	CAACUGCAAC
1-CAASAGCAAC	STREME-1	cds_PVP01_0709000.1	4155	4164	.	13.69	CAACUGCAAC
1-CAASAGCAAC	STREME-1	cds_PVP01_1226900.1	1286	1295	.	13.69	CAACUGCAAC
1-CAASAGCAAC	STREME-1	cds_PVP01_0110400.1	6714	6723	.	13.69	CAACUGCAAC
1-CAASAGCAAC	STREME-1	cds_PVP01_1238400.1	1263	1272	.	13.69	CAACUGCAAC
1-CAASAGCAAC	STREME-1	cds_PVP01_0106700.1	4473	4482	.	13.69	CAACUGCAAC
1-CAASAGCAAC	STREME-1	cds_PVP01_1022500.1	24225	24234	.	13.69	CAACUGCAAC
1-CAASAGCAAC	STREME-1	cds_PVP01_0208800.1	1911	1920	.	13.69	CAACUGCAAC
1-CAASAGCAAC	STREME-1	cds_PVP01_1225400.1	3449	3458	.	13.69	CAACUGCAAC
1-CAASAGCAAC	STREME-1	cds_PVP01_1206500.1	2754	2763	.	13.69	CAACUGCAAC
1-CAASAGCAAC	STREME-1	cds_PVP01_0409600.1	1692	1701	.	13.69	CAACUGCAAC
1-CAASAGCAAC	STREME-1	cds_PVP01_1033900.1	2824	2833	.	13.69	CAACUGCAAC
1-CAASAGCAAC	STREME-1	cds_PVP01_0707000.1	5507	5516	.	13.69	CAACUGCAAC
1-CAASAGCAAC	STREME-1	cds_PVP01_0620400.1	1100	1109	.	13.69	CAACUGCAAC
1-CAASAGCAAC	STREME-1	cds_PVP01_0315600.1	860	869	.	13.69	CAACUGCAAC
1-CAASAGCAAC	STREME-1	cds_PVP01_0814700.1	5881	5890	.	13.69	CAACUGCAAC
1-CAASAGCAAC	STREME-1	cds_PVP01_0814700.1	5887	5896	.	13.69	CAACUGCAAC
1-CAASAGCAAC	STREME-1	cds_PVP01_1023900.1	5426	5435	.	13.69	CAACUGCAAC
1-CAASAGCAAC	STREME-1	cds_PVP01_0606900.1	8869	8878	.	13.69	CAACUGCAAC
1-CAASAGCAAC	STREME-1	cds_PVP01_1119800.1	786	795	.	13.69	CAACUGCAAC
1-CAASAGCAAC	STREME-1	cds_PVP01_1125700.1	660	669	.	13.69	CAACUGCAAC
1-CAASAGCAAC	STREME-1	cds_PVP01_1125700.1	2328	2337	.	13.69	CAACUGCAAC
1-CAASAGCAAC	STREME-1	cds_PVP01_1141300.1	3585	3594	.	13.69	CAACUGCAAC
1-CAASAGCAAC	STREME-1	cds_PVP01_0807700.1	4774	4783	.	13.69	CAACUGCAAC
1-CAASAGCAAC	STREME-1	cds_PVP01_0941300.1	1548	1557	.	13.69	CAACUGCAAC
1-CAASAGCAAC	STREME-1	cds_PVP01_0307100.1	4432	4441	.	13.69	CAACUGCAAC
1-CAASAGCAAC	STREME-1	cds_PVP01_0939000.1	7734	7743	.	13.69	CAACUGCAAC
1-CAASAGCAAC	STREME-1	cds_PVP01_1113900.1	1497	1506	.	13.69	CAACUGCAAC
1-CAASAGCAAC	STREME-1	cds_PVP01_0511400.1	2115	2124	.	13.69	CAACUGCAAC
1-CAASAGCAAC	STREME-1	cds_PVP01_0610000.1	2103	2112	.	13.69	CAACUGCAAC
1-CAASAGCAAC	STREME-1	cds_PVP01_0408300.1	1537	1546	.	13.69	CAACUGCAAC
1-CAASAGCAAC	STREME-1	cds_PVP01_0916700.1	3594	3603	.	13.69	CACGAUCAAC
1-CAASAGCAAC	STREME-1	cds_PVP01_1313300.1	6735	6744	.	13.69	CACGAUCAAC
1-CAASAGCAAC	STREME-1	cds_PVP01_1339500.1	3117	3126	.	13.69	CACGAUCAAC
1-CAASAGCAAC	STREME-1	cds_PVP01_1144400.1	7170	7179	.	13.69	CACGAUCAAC
1-CAASAGCAAC	STREME-1	cds_PVP01_0212200.1	185	194	.	13.69	CACGAUCAAC
1-CAASAGCAAC	STREME-1	cds_PVP01_1025700.1	42	51	.	13.69	CACGAUCAAC
1-CAASAGCAAC	STREME-1	cds_PVP01_1456600.1	771	780	.	13.59	CAAGAGCAUC
1-CAASAGCAAC	STREME-1	cds_PVP01_0319500.1	5286	5295	.	13.59	CAAGAGCAUC
1-CAASAGCAAC	STREME-1	cds_PVP01_0409600.1	912	921	.	13.59	CAAGAGCAUC
1-CAASAGCAAC	STREME-1	cds_PVP01_1322500.1	3872	3881	.	13.59	CAAGAGCAUC
1-CAASAGCAAC	STREME-1	cds_PVP01_0735000.1	630	639	.	13.59	CAAGAGCAUC
1-CAASAGCAAC	STREME-1	cds_PVP01_0732200.1	381	390	.	13.59	CAAGAGCAUC
1-CAASAGCAAC	STREME-1	cds_PVP01_1318000.1	279	288	.	13.59	CAAGAGCAUC
1-CAASAGCAAC	STREME-1	cds_PVP01_1447400.1	2364	2373	.	13.59	CAAGAGCAUC
1-CAASAGCAAC	STREME-1	cds_PVP01_1137400.1	1340	1349	.	13.59	CAAGAGCAUC
1-CAASAGCAAC	STREME-1	cds_PVP01_0817100.1	2496	2505	.	13.59	CAAGAGCAUC
1-CAASAGCAAC	STREME-1	cds_PVP01_1448000.1	1356	1365	.	13.59	CAAGAGCAUC
1-CAASAGCAAC	STREME-1	cds_PVP01_1315700.1	3366	3375	.	13.59	CAAGAGCAUC
1-CAASAGCAAC	STREME-1	cds_PVP01_1340300.1	6381	6390	.	13.59	CAAGAGCAUC
1-CAASAGCAAC	STREME-1	cds_PVP01_1130500.1	3276	3285	.	13.59	CAAGAGCAUC
1-CAASAGCAAC	STREME-1	cds_PVP01_1139900.1	5079	5088	.	13.59	CAAGAGCAUC
1-CAASAGCAAC	STREME-1	cds_PVP01_0927400.1	1386	1395	.	13.59	CAAGAGCAUC
1-CAASAGCAAC	STREME-1	cds_PVP01_1228800.1	4845	4854	.	13.59	CAAGAGCAUC
1-CAASAGCAAC	STREME-1	cds_PVP01_0920000.1	2016	2025	.	13.59	CAAGAGCAUC
1-CAASAGCAAC	STREME-1	cds_PVP01_1022200.1	1083	1092	.	13.59	CAAGAGCAUC
1-CAASAGCAAC	STREME-1	cds_PVP01_0604700.1	2290	2299	.	13.52	CAAGAUCGAC
1-CAASAGCAAC	STREME-1	cds_PVP01_1325700.1	2175	2184	.	13.52	CAAGAUCGAC
1-CAASAGCAAC	STREME-1	cds_PVP01_0939400.1	1776	1785	.	13.52	CAAGAUCGAC
1-CAASAGCAAC	STREME-1	cds_PVP01_1422300.1	2308	2317	.	13.4	CACCAGCAAC
1-CAASAGCAAC	STREME-1	cds_PVP01_0829300.1	1035	1044	.	13.4	CACCAGCAAC
1-CAASAGCAAC	STREME-1	cds_PVP01_1139300.1	3722	3731	.	13.4	CACCAGCAAC
1-CAASAGCAAC	STREME-1	cds_PVP01_1429300.1	1569	1578	.	13.4	CACCAGCAAC
1-CAASAGCAAC	STREME-1	cds_PVP01_1225200.1	816	825	.	13.4	CACCAGCAAC
1-CAASAGCAAC	STREME-1	cds_PVP01_1439300.1	859	868	.	13.4	CACCAGCAAC
1-CAASAGCAAC	STREME-1	cds_PVP01_1210500.1	4440	4449	.	13.4	CACCAGCAAC
1-CAASAGCAAC	STREME-1	cds_PVP01_0607100.1	4761	4770	.	13.4	CACCAGCAAC
1-CAASAGCAAC	STREME-1	cds_PVP01_1266900.1	828	837	.	13.4	CACCAGCAAC
1-CAASAGCAAC	STREME-1	cds_PVP01_0728900.1	3854	3863	.	13.4	CACCAGCAAC
1-CAASAGCAAC	STREME-1	cds_PVP01_0730800.1	2689	2698	.	13.37	CAACAUCAUC
1-CAASAGCAAC	STREME-1	cds_PVP01_0506100.1	474	483	.	13.37	CAACAUCAUC
1-CAASAGCAAC	STREME-1	cds_PVP01_1232700.1	297	306	.	13.37	CAACAUCAUC
1-CAASAGCAAC	STREME-1	cds_PVP01_0414300.1	168	177	.	13.37	CAACAUCAUC
1-CAASAGCAAC	STREME-1	cds_PVP01_1445400.1	4947	4956	.	13.37	CAACAUCAUC
1-CAASAGCAAC	STREME-1	cds_PVP01_1224100.1	711	720	.	13.37	CAACAUCAUC
1-CAASAGCAAC	STREME-1	cds_PVP01_0913800.1	10950	10959	.	13.37	CAACAUCAUC
1-CAASAGCAAC	STREME-1	cds_PVP01_0818800.1	114	123	.	13.37	CAACAUCAUC
1-CAASAGCAAC	STREME-1	cds_PVP01_1011500.1	9944	9953	.	13.37	CAACAUCAUC
1-CAASAGCAAC	STREME-1	cds_PVP01_0406800.1	2292	2301	.	13.37	CAACAUCAUC
1-CAASAGCAAC	STREME-1	cds_PVP01_0211300.1	3509	3518	.	13.37	CAACAUCAUC
1-CAASAGCAAC	STREME-1	cds_PVP01_1267000.1	5697	5706	.	13.37	CAACAUCAUC
1-CAASAGCAAC	STREME-1	cds_PVP01_1425200.1	2307	2316	.	13.37	CAACAUCAUC
1-CAASAGCAAC	STREME-1	cds_PVP01_0712800.1	486	495	.	13.37	CAACAUCAUC
1-CAASAGCAAC	STREME-1	cds_PVP01_1216900.1	528	537	.	13.37	CAACAUCAUC
1-CAASAGCAAC	STREME-1	cds_PVP01_1139900.1	2772	2781	.	13.37	CAACAUCAUC
1-CAASAGCAAC	STREME-1	cds_PVP01_1437300.1	140	149	.	13.37	CAACAUCAUC
1-CAASAGCAAC	STREME-1	cds_PVP01_0730800.1	5	14	.	13.37	CUACAGCAAC
1-CAASAGCAAC	STREME-1	cds_PVP01_0719100.1	228	237	.	13.37	CUACAGCAAC
1-CAASAGCAAC	STREME-1	cds_PVP01_1022500.1	16410	16419	.	13.37	CUACAGCAAC
1-CAASAGCAAC	STREME-1	cds_PVP01_1022500.1	32829	32838	.	13.37	CUACAGCAAC
1-CAASAGCAAC	STREME-1	cds_PVP01_0916700.1	1896	1905	.	13.37	CUACAGCAAC
1-CAASAGCAAC	STREME-1	cds_PVP01_0815000.1	1023	1032	.	13.37	CUACAGCAAC
1-CAASAGCAAC	STREME-1	cds_PVP01_0010200.1	1787	1796	.	13.37	CUACAGCAAC
1-CAASAGCAAC	STREME-1	cds_PVP01_1238700.1	804	813	.	13.37	CUACAGCAAC
1-CAASAGCAAC	STREME-1	cds_PVP01_1208400.1	11787	11796	.	13.37	CUACAGCAAC
1-CAASAGCAAC	STREME-1	cds_PVP01_1025100.1	2019	2028	.	13.37	CUACAGCAAC
1-CAASAGCAAC	STREME-1	cds_PVP01_1023900.1	2973	2982	.	13.37	CUACAGCAAC
1-CAASAGCAAC	STREME-1	cds_PVP01_0606900.1	4297	4306	.	13.37	CUACAGCAAC
1-CAASAGCAAC	STREME-1	cds_PVP01_1119800.1	10816	10825	.	13.37	CUACAGCAAC
1-CAASAGCAAC	STREME-1	cds_PVP01_0304000.1	3351	3360	.	13.37	CUACAGCAAC
1-CAASAGCAAC	STREME-1	cds_PVP01_1469500.1	6828	6837	.	13.37	CUACAGCAAC
1-CAASAGCAAC	STREME-1	cds_PVP01_0923700.1	642	651	.	13.37	CUACAGCAAC
1-CAASAGCAAC	STREME-1	cds_PVP01_0835100.1	3258	3267	.	13.37	CUACAGCAAC
1-CAASAGCAAC	STREME-1	cds_PVP01_0624500.1	820	829	.	13.37	CUACAGCAAC
1-CAASAGCAAC	STREME-1	cds_PVP01_1133600.1	1401	1410	.	13.37	CUACAGCAAC
1-CAASAGCAAC	STREME-1	cds_PVP01_0525700.1	75	84	.	13.37	CUACAGCAAC
1-CAASAGCAAC	STREME-1	cds_PVP01_0908600.1	5640	5649	.	13.37	CUACAGCAAC
1-CAASAGCAAC	STREME-1	cds_PVP01_0908600.1	5754	5763	.	13.37	CUACAGCAAC
1-CAASAGCAAC	STREME-1	cds_PVP01_1306100.1	222	231	.	13.37	CUACAGCAAC
1-CAASAGCAAC	STREME-1	cds_PVP01_0939400.1	10425	10434	.	13.37	CUACAGCAAC
1-CAASAGCAAC	STREME-1	cds_PVP01_1113900.1	5385	5394	.	13.37	CUACAGCAAC
1-CAASAGCAAC	STREME-1	cds_PVP01_0729100.1	3907	3916	.	13.37	CUACAGCAAC
1-CAASAGCAAC	STREME-1	cds_PVP01_0839000.1	52	61	.	13.37	CUACAGCAAC
1-CAASAGCAAC	STREME-1	cds_PVP01_1456600.1	795	804	.	13.37	CAAUAGCAUC
1-CAASAGCAAC	STREME-1	cds_PVP01_1456600.1	807	816	.	13.37	CAAUAGCAUC
1-CAASAGCAAC	STREME-1	cds_PVP01_1264300.1	2956	2965	.	13.37	CAAUAGCAUC
1-CAASAGCAAC	STREME-1	cds_PVP01_1318000.1	2292	2301	.	13.37	CAAUAGCAUC
1-CAASAGCAAC	STREME-1	cds_PVP01_0105700.1	397	406	.	13.36	CACGAGCAAC
1-CAASAGCAAC	STREME-1	cds_PVP01_0815000.1	5643	5652	.	13.36	CACGAGCAAC
1-CAASAGCAAC	STREME-1	cds_PVP01_0309100.1	585	594	.	13.36	CACGAGCAAC
1-CAASAGCAAC	STREME-1	cds_PVP01_1237600.1	451	460	.	13.36	CACGAGCAAC
1-CAASAGCAAC	STREME-1	cds_PVP01_1211000.1	471	480	.	13.36	CACGAGCAAC
1-CAASAGCAAC	STREME-1	cds_PVP01_0905700.1	3631	3640	.	13.36	CACGAGCAAC
1-CAASAGCAAC	STREME-1	cds_PVP01_0204500.1	4476	4485	.	13.36	CACGAGCAAC
1-CAASAGCAAC	STREME-1	cds_PVP01_0720600.1	1824	1833	.	13.36	CACGAGCAAC
1-CAASAGCAAC	STREME-1	cds_PVP01_0821200.1	57	66	.	13.36	CACGAGCAAC
1-CAASAGCAAC	STREME-1	cds_PVP01_0525900.1	303	312	.	13.36	CACGAGCAAC
1-CAASAGCAAC	STREME-1	cds_PVP01_0807700.1	429	438	.	13.36	CACGAGCAAC
1-CAASAGCAAC	STREME-1	cds_PVP01_1451400.1	4910	4919	.	13.36	CACGAGCAAC
1-CAASAGCAAC	STREME-1	cds_PVP01_1329900.1	2394	2403	.	13.36	CACGAGCAAC
1-CAASAGCAAC	STREME-1	cds_PVP01_0730800.1	3001	3010	.	13.35	CAAGACCAAC
1-CAASAGCAAC	STREME-1	cds_PVP01_0829900.1	1130	1139	.	13.35	CAAGACCAAC
1-CAASAGCAAC	STREME-1	cds_PVP01_1136400.1	375	384	.	13.35	CAAGACCAAC
1-CAASAGCAAC	STREME-1	cds_PVP01_0932800.1	1335	1344	.	13.35	CAAGACCAAC
1-CAASAGCAAC	STREME-1	cds_PVP01_1121400.1	19770	19779	.	13.35	CAAGACCAAC
1-CAASAGCAAC	STREME-1	cds_PVP01_1203100.1	297	306	.	13.35	CAAGACCAAC
1-CAASAGCAAC	STREME-1	cds_PVP01_1308000.1	4053	4062	.	13.35	CAAGACCAAC
1-CAASAGCAAC	STREME-1	cds_PVP01_1328600.1	630	639	.	13.35	CAAGACCAAC
1-CAASAGCAAC	STREME-1	cds_PVP01_0409300.1	3884	3893	.	13.35	CAAGACCAAC
1-CAASAGCAAC	STREME-1	cds_PVP01_1014400.1	3618	3627	.	13.35	CAAGACCAAC
1-CAASAGCAAC	STREME-1	cds_PVP01_0102600.1	133	142	.	13.35	CAAGACCAAC
1-CAASAGCAAC	STREME-1	cds_PVP01_0212100.1	1357	1366	.	13.33	CAACAUCUAC
1-CAASAGCAAC	STREME-1	cds_PVP01_0520500.1	1041	1050	.	13.33	CAACAUCUAC
1-CAASAGCAAC	STREME-1	cds_PVP01_1464800.1	733	742	.	13.33	CAACAUCUAC
1-CAASAGCAAC	STREME-1	cds_PVP01_1312300.1	2247	2256	.	13.33	CAACAUCUAC
1-CAASAGCAAC	STREME-1	cds_PVP01_1215100.1	3162	3171	.	13.33	CAACAUCUAC
1-CAASAGCAAC	STREME-1	cds_PVP01_0304000.1	6651	6660	.	13.33	CAACAUCUAC
1-CAASAGCAAC	STREME-1	cds_PVP01_0817100.1	2289	2298	.	13.33	CAACAUCUAC
1-CAASAGCAAC	STREME-1	cds_PVP01_0817100.1	3555	3564	.	13.33	CAACAUCUAC
1-CAASAGCAAC	STREME-1	cds_PVP01_0604700.1	2065	2074	.	13.33	CAACAUCUAC
1-CAASAGCAAC	STREME-1	cds_PVP01_0417700.1	2508	2517	.	13.33	CAACAUCUAC
1-CAASAGCAAC	STREME-1	cds_PVP01_0615000.1	2121	2130	.	13.33	CAACAUCUAC
1-CAASAGCAAC	STREME-1	cds_PVP01_0727700.1	219	228	.	13.33	CAACAUCUAC
1-CAASAGCAAC	STREME-1	cds_PVP01_1414500.1	4293	4302	.	13.33	CAACAUCUAC
1-CAASAGCAAC	STREME-1	cds_PVP01_0212100.1	1312	1321	.	13.28	CAACAGCGAC
1-CAASAGCAAC	STREME-1	cds_PVP01_0822600.1	423	432	.	13.28	CAACAGCGAC
1-CAASAGCAAC	STREME-1	cds_PVP01_0529300.1	3999	4008	.	13.28	CAACAGCGAC
1-CAASAGCAAC	STREME-1	cds_PVP01_0529300.1	8037	8046	.	13.28	CAACAGCGAC
1-CAASAGCAAC	STREME-1	cds_PVP01_1206500.1	3504	3513	.	13.28	CAACAGCGAC
1-CAASAGCAAC	STREME-1	cds_PVP01_1440900.1	309	318	.	13.28	CAACAGCGAC
1-CAASAGCAAC	STREME-1	cds_PVP01_1125700.1	3348	3357	.	13.28	CAACAGCGAC
1-CAASAGCAAC	STREME-1	cds_PVP01_1211100.1	78	87	.	13.28	CAACAGCGAC
1-CAASAGCAAC	STREME-1	cds_PVP01_1343200.1	1035	1044	.	13.28	CAACAGCGAC
1-CAASAGCAAC	STREME-1	cds_PVP01_0417000.1	1422	1431	.	13.28	CAACAGCGAC
1-CAASAGCAAC	STREME-1	cds_PVP01_1306100.1	732	741	.	13.28	CAACAGCGAC
1-CAASAGCAAC	STREME-1	cds_PVP01_0832500.1	1155	1164	.	13.28	CAACAGCGAC
1-CAASAGCAAC	STREME-1	cds_PVP01_0516600.1	3291	3300	.	13.28	CAACAGCGAC
1-CAASAGCAAC	STREME-1	cds_PVP01_1020300.1	2106	2115	.	13.28	CAACAGCGAC
1-CAASAGCAAC	STREME-1	cds_PVP01_1124900.1	8577	8586	.	13.28	CAACAGCGAC
1-CAASAGCAAC	STREME-1	cds_PVP01_1135000.1	1101	1110	.	13.25	CAAGUGCAAC
1-CAASAGCAAC	STREME-1	cds_PVP01_0616600.1	1782	1791	.	13.25	CAAGUGCAAC
1-CAASAGCAAC	STREME-1	cds_PVP01_0715100.1	222	231	.	13.25	CAAGUGCAAC
1-CAASAGCAAC	STREME-1	cds_PVP01_0924600.1	909	918	.	13.25	CAAGUGCAAC
1-CAASAGCAAC	STREME-1	cds_PVP01_0734500.1	2491	2500	.	13.25	CAAGUGCAAC
1-CAASAGCAAC	STREME-1	cds_PVP01_0917400.1	979	988	.	13.25	CAAGUGCAAC
1-CAASAGCAAC	STREME-1	cds_PVP01_1135500.1	2341	2350	.	13.25	CAAGUGCAAC
1-CAASAGCAAC	STREME-1	cds_PVP01_0613600.1	1226	1235	.	13.25	CAAGUGCAAC
1-CAASAGCAAC	STREME-1	cds_PVP01_0623800.1	2826	2835	.	13.25	CAAGUGCAAC
1-CAASAGCAAC	STREME-1	cds_PVP01_0942800.1	3891	3900	.	13.25	CAAGUGCAAC
1-CAASAGCAAC	STREME-1	cds_PVP01_0210400.1	2991	3000	.	13.25	CAAGUGCAAC
1-CAASAGCAAC	STREME-1	cds_PVP01_0801600.1	1564	1573	.	13.25	CAAGUGCAAC
1-CAASAGCAAC	STREME-1	cds_PVP01_0801600.1	1582	1591	.	13.25	CAAGUGCAAC
1-CAASAGCAAC	STREME-1	cds_PVP01_1301900.1	5413	5422	.	13.25	CAAGUGCAAC
1-CAASAGCAAC	STREME-1	cds_PVP01_0722500.1	2189	2198	.	13.25	CAAGUGCAAC
1-CAASAGCAAC	STREME-1	cds_PVP01_0807800.1	7512	7521	.	13.25	CAAGUGCAAC
1-CAASAGCAAC	STREME-1	cds_PVP01_0706700.1	1332	1341	.	13.25	CAAGUGCAAC
1-CAASAGCAAC	STREME-1	cds_PVP01_0408300.1	732	741	.	13.25	CAAGUGCAAC
1-CAASAGCAAC	STREME-1	cds_PVP01_0936000.1	1391	1400	.	13.25	CAAGUGCAAC
1-CAASAGCAAC	STREME-1	cds_PVP01_0829800.1	1197	1206	.	13.2	CGACAGCUAC
1-CAASAGCAAC	STREME-1	cds_PVP01_1457300.1	4653	4662	.	13.2	CGACAGCUAC
1-CAASAGCAAC	STREME-1	cds_PVP01_1340300.1	2841	2850	.	13.2	CGACAGCUAC
1-CAASAGCAAC	STREME-1	cds_PVP01_0813600.1	2676	2685	.	13.2	CGACAGCUAC
1-CAASAGCAAC	STREME-1	cds_PVP01_0713300.1	3003	3012	.	13.17	CAAGUUCAAC
1-CAASAGCAAC	STREME-1	cds_PVP01_1139300.1	3755	3764	.	13.17	CAAGUUCAAC
1-CAASAGCAAC	STREME-1	cds_PVP01_1452000.1	2565	2574	.	13.17	CAAGUUCAAC
1-CAASAGCAAC	STREME-1	cds_PVP01_1233400.1	687	696	.	13.17	CAAGUUCAAC
1-CAASAGCAAC	STREME-1	cds_PVP01_1312500.1	1613	1622	.	13.17	CAAGUUCAAC
1-CAASAGCAAC	STREME-1	cds_PVP01_1130500.1	543	552	.	13.17	CAAGUUCAAC
1-CAASAGCAAC	STREME-1	cds_PVP01_0728900.1	2284	2293	.	13.17	CAAGUUCAAC
1-CAASAGCAAC	STREME-1	cds_PVP01_1139900.1	12285	12294	.	13.17	CAAGUUCAAC
1-CAASAGCAAC	STREME-1	cds_PVP01_1316100.1	7638	7647	.	13.1	CAAGAGCGAC
1-CAASAGCAAC	STREME-1	cds_PVP01_0410000.1	126	135	.	13.1	CAAGAGCGAC
1-CAASAGCAAC	STREME-1	cds_PVP01_1225400.1	2595	2604	.	13.1	CAAGAGCGAC
1-CAASAGCAAC	STREME-1	cds_PVP01_1458300.1	4048	4057	.	13.1	CAAGAGCGAC
1-CAASAGCAAC	STREME-1	cds_PVP01_0725000.1	3138	3147	.	13.1	CAAGAGCGAC
1-CAASAGCAAC	STREME-1	cds_PVP01_0523400.1	510	519	.	13.1	CAAGAGCGAC
1-CAASAGCAAC	STREME-1	cds_PVP01_0917400.1	2609	2618	.	13.1	CAAGAGCGAC
1-CAASAGCAAC	STREME-1	cds_PVP01_1142900.1	2262	2271	.	13.04	CUAUAGCAAC
1-CAASAGCAAC	STREME-1	cds_PVP01_1228800.1	2070	2079	.	13.04	CUAUAGCAAC
1-CAASAGCAAC	STREME-1	cds_PVP01_0905200.1	141	150	.	13.03	CAACUUCAAC
1-CAASAGCAAC	STREME-1	cds_PVP01_1402700.1	3	12	.	13.03	CAACUUCAAC
1-CAASAGCAAC	STREME-1	cds_PVP01_1305400.1	2856	2865	.	13.03	CAACUUCAAC
1-CAASAGCAAC	STREME-1	cds_PVP01_0928700.1	5820	5829	.	13.03	CAACUUCAAC
1-CAASAGCAAC	STREME-1	cds_PVP01_0945900.1	3291	3300	.	13.03	CAACUUCAAC
1-CAASAGCAAC	STREME-1	cds_PVP01_1424300.1	834	843	.	13.03	CAACUUCAAC
1-CAASAGCAAC	STREME-1	cds_PVP01_0732200.1	291	300	.	13.03	CAACUUCAAC
1-CAASAGCAAC	STREME-1	cds_PVP01_0907900.1	1428	1437	.	13.03	CAACUUCAAC
1-CAASAGCAAC	STREME-1	cds_PVP01_0615300.1	1281	1290	.	13.03	CAACUUCAAC
1-CAASAGCAAC	STREME-1	cds_PVP01_0519500.1	4146	4155	.	13.03	CAACUUCAAC
1-CAASAGCAAC	STREME-1	cds_PVP01_1121400.1	16089	16098	.	13.03	CAACUUCAAC
1-CAASAGCAAC	STREME-1	cds_PVP01_0921700.1	2335	2344	.	13.03	CAACUUCAAC
1-CAASAGCAAC	STREME-1	cds_PVP01_0801700.1	105	114	.	13.03	CAACUUCAAC
1-CAASAGCAAC	STREME-1	cds_PVP01_1312900.1	2400	2409	.	13.03	CAACUUCAAC
1-CAASAGCAAC	STREME-1	cds_PVP01_1130500.1	15	24	.	13.03	CAACUUCAAC
1-CAASAGCAAC	STREME-1	cds_PVP01_0706700.1	4986	4995	.	13.03	CAACUUCAAC
1-CAASAGCAAC	STREME-1	cds_PVP01_0110400.1	8676	8685	.	13.01	CACCAUCAAC
1-CAASAGCAAC	STREME-1	cds_PVP01_1022500.1	16194	16203	.	13.01	CACCAUCAAC
1-CAASAGCAAC	STREME-1	cds_PVP01_1328700.1	2370	2379	.	13.01	CACCAUCAAC
1-CAASAGCAAC	STREME-1	cds_PVP01_0117600.1	2037	2046	.	13.01	CACCAUCAAC
1-CAASAGCAAC	STREME-1	cds_PVP01_0305300.1	1996	2005	.	13.01	CACCAUCAAC
1-CAASAGCAAC	STREME-1	cds_PVP01_1441400.1	78	87	.	13.01	CACCAUCAAC
1-CAASAGCAAC	STREME-1	cds_PVP01_0921600.1	246	255	.	13.01	CACCAUCAAC
1-CAASAGCAAC	STREME-1	cds_PVP01_1316000.1	4224	4233	.	13.01	CACCAUCAAC
1-CAASAGCAAC	STREME-1	cds_PVP01_1466800.1	2097	2106	.	13.01	CACCAUCAAC
1-CAASAGCAAC	STREME-1	cds_PVP01_0818400.1	7164	7173	.	13.01	CACCAUCAAC
1-CAASAGCAAC	STREME-1	cds_PVP01_1411700.1	48	57	.	13.01	CACCAUCAAC
1-CAASAGCAAC	STREME-1	cds_PVP01_0615000.1	2556	2565	.	13.01	CACCAUCAAC
1-CAASAGCAAC	STREME-1	cds_PVP01_0110400.1	5302	5311	.	12.98	CUACAUCAAC
1-CAASAGCAAC	STREME-1	cds_PVP01_0116000.1	6648	6657	.	12.98	CUACAUCAAC
1-CAASAGCAAC	STREME-1	cds_PVP01_0935100.1	6624	6633	.	12.98	CUACAUCAAC
1-CAASAGCAAC	STREME-1	cds_PVP01_0310100.1	3036	3045	.	12.98	CUACAUCAAC
1-CAASAGCAAC	STREME-1	cds_PVP01_1442400.1	1968	1977	.	12.98	CUACAUCAAC
1-CAASAGCAAC	STREME-1	cds_PVP01_0803200.1	4263	4272	.	12.98	CUACAUCAAC
1-CAASAGCAAC	STREME-1	cds_PVP01_1418000.1	1269	1278	.	12.98	CUACAUCAAC
1-CAASAGCAAC	STREME-1	cds_PVP01_1023900.1	919	928	.	12.98	CUACAUCAAC
1-CAASAGCAAC	STREME-1	cds_PVP01_0703000.1	3753	3762	.	12.98	CUACAUCAAC
1-CAASAGCAAC	STREME-1	cds_PVP01_1029200.1	7974	7983	.	12.98	CUACAUCAAC
1-CAASAGCAAC	STREME-1	cds_PVP01_1449500.1	438	447	.	12.98	CUACAUCAAC
1-CAASAGCAAC	STREME-1	cds_PVP01_1340300.1	13854	13863	.	12.98	CUACAUCAAC
1-CAASAGCAAC	STREME-1	cds_PVP01_1135200.1	2178	2187	.	12.98	CUACAUCAAC
1-CAASAGCAAC	STREME-1	cds_PVP01_1132900.1	1494	1503	.	12.98	CAACAUCGAC
1-CAASAGCAAC	STREME-1	cds_PVP01_0919300.1	1618	1627	.	12.98	CAACAUCGAC
1-CAASAGCAAC	STREME-1	cds_PVP01_0520500.1	2013	2022	.	12.98	CAACAUCGAC
1-CAASAGCAAC	STREME-1	cds_PVP01_1211000.1	8427	8436	.	12.98	CAACAUCGAC
1-CAASAGCAAC	STREME-1	cds_PVP01_1106300.1	1380	1389	.	12.98	CAACAUCGAC
1-CAASAGCAAC	STREME-1	cds_PVP01_1142200.1	392	401	.	12.98	CAACAUCGAC
1-CAASAGCAAC	STREME-1	cds_PVP01_1266900.1	2400	2409	.	12.98	CAACAUCGAC
1-CAASAGCAAC	STREME-1	cds_PVP01_1448000.1	234	243	.	12.98	CAACAUCGAC
1-CAASAGCAAC	STREME-1	cds_PVP01_0307100.1	3297	3306	.	12.98	CAACAUCGAC
1-CAASAGCAAC	STREME-1	cds_PVP01_1340300.1	9744	9753	.	12.98	CAACAUCGAC
1-CAASAGCAAC	STREME-1	cds_PVP01_0807800.1	105	114	.	12.98	CAACAUCGAC
1-CAASAGCAAC	STREME-1	cds_PVP01_0942800.1	6675	6684	.	12.93	CGAUAGCUAC
1-CAASAGCAAC	STREME-1	cds_PVP01_0906100.1	1237	1246	.	12.93	CGAUAGCUAC
1-CAASAGCAAC	STREME-1	cds_PVP01_1026000.1	561	570	.	12.93	CGAUAGCUAC
1-CAASAGCAAC	STREME-1	cds_PVP01_0213800.1	7146	7155	.	12.89	CAAUAGCGAC
1-CAASAGCAAC	STREME-1	cds_PVP01_0214800.1	6849	6858	.	12.89	CAAUAGCGAC
1-CAASAGCAAC	STREME-1	cds_PVP01_1220600.1	906	915	.	12.89	CAAUAGCGAC
1-CAASAGCAAC	STREME-1	cds_PVP01_1220600.1	942	951	.	12.89	CAAUAGCGAC
1-CAASAGCAAC	STREME-1	cds_PVP01_0715400.1	1125	1134	.	12.89	CAAUAGCGAC
1-CAASAGCAAC	STREME-1	cds_PVP01_1105700.1	6996	7005	.	12.89	CAAUAGCGAC
1-CAASAGCAAC	STREME-1	cds_PVP01_1308000.1	3774	3783	.	12.89	CAAUAGCGAC
1-CAASAGCAAC	STREME-1	cds_PVP01_0104500.1	2568	2577	.	12.85	CGACAGCAUC
1-CAASAGCAAC	STREME-1	cds_PVP01_1143100.1	1731	1740	.	12.85	CGACAGCAUC
1-CAASAGCAAC	STREME-1	cds_PVP01_0829800.1	2640	2649	.	12.85	CGACAGCAUC
1-CAASAGCAAC	STREME-1	cds_PVP01_0715400.1	2586	2595	.	12.85	CGACAGCAUC
1-CAASAGCAAC	STREME-1	cds_PVP01_1235400.1	1416	1425	.	12.85	CGACAGCAUC
1-CAASAGCAAC	STREME-1	cds_PVP01_1024200.1	4536	4545	.	12.85	CGACAGCAUC
1-CAASAGCAAC	STREME-1	cds_PVP01_0116000.1	8079	8088	.	12.78	CGACUGCAAC
1-CAASAGCAAC	STREME-1	cds_PVP01_1445400.1	921	930	.	12.78	CGACUGCAAC
1-CAASAGCAAC	STREME-1	cds_PVP01_0112000.1	321	330	.	12.78	CGACUGCAAC
1-CAASAGCAAC	STREME-1	cds_PVP01_0920300.1	558	567	.	12.78	CGACUGCAAC
1-CAASAGCAAC	STREME-1	cds_PVP01_0114000.1	1345	1354	.	12.78	CGACUGCAAC
1-CAASAGCAAC	STREME-1	cds_PVP01_1438600.1	1565	1574	.	12.78	CGACUGCAAC
1-CAASAGCAAC	STREME-1	cds_PVP01_1139900.1	1776	1785	.	12.78	CGACUGCAAC
1-CAASAGCAAC	STREME-1	cds_PVP01_1014400.1	6168	6177	.	12.78	CGACUGCAAC
1-CAASAGCAAC	STREME-1	cds_PVP01_1144800.1	1380	1389	.	12.78	CAACAGUAAC
1-CAASAGCAAC	STREME-1	cds_PVP01_1260500.1	3243	3252	.	12.78	CAACAGUAAC
1-CAASAGCAAC	STREME-1	cds_PVP01_1238700.1	2148	2157	.	12.78	CAACAGUAAC
1-CAASAGCAAC	STREME-1	cds_PVP01_1208400.1	13260	13269	.	12.78	CAACAGUAAC
1-CAASAGCAAC	STREME-1	cds_PVP01_1011500.1	19961	19970	.	12.78	CAACAGUAAC
1-CAASAGCAAC	STREME-1	cds_PVP01_0720600.1	3513	3522	.	12.78	CAACAGUAAC
1-CAASAGCAAC	STREME-1	cds_PVP01_1419700.1	2022	2031	.	12.78	CAACAGUAAC
1-CAASAGCAAC	STREME-1	cds_PVP01_1437300.1	1063	1072	.	12.78	CAACAGUAAC
1-CAASAGCAAC	STREME-1	cds_PVP01_0719100.1	33	42	.	12.75	CAACACCAAC
1-CAASAGCAAC	STREME-1	cds_PVP01_1256500.1	3831	3840	.	12.75	CAACACCAAC
1-CAASAGCAAC	STREME-1	cds_PVP01_0822800.1	5247	5256	.	12.75	CAACACCAAC
1-CAASAGCAAC	STREME-1	cds_PVP01_0304600.1	951	960	.	12.75	CAACACCAAC
1-CAASAGCAAC	STREME-1	cds_PVP01_0529800.1	1800	1809	.	12.7	CGAGAGCUAC
1-CAASAGCAAC	STREME-1	cds_PVP01_0529800.1	5136	5145	.	12.7	CGAGAGCUAC
1-CAASAGCAAC	STREME-1	cds_PVP01_0928700.1	6195	6204	.	12.7	CGAGAGCUAC
1-CAASAGCAAC	STREME-1	cds_PVP01_1445400.1	3690	3699	.	12.7	CGAGAGCUAC
1-CAASAGCAAC	STREME-1	cds_PVP01_1004500.1	1629	1638	.	12.7	CGAGAGCUAC
1-CAASAGCAAC	STREME-1	cds_PVP01_0609100.1	9418	9427	.	12.7	CGAGAGCUAC
1-CAASAGCAAC	STREME-1	cds_PVP01_0725000.1	148	157	.	12.7	CGAGAGCUAC
1-CAASAGCAAC	STREME-1	cds_PVP01_1445800.1	1674	1683	.	12.7	CGAGAGCUAC
1-CAASAGCAAC	STREME-1	cds_PVP01_0320400.1	442	451	.	12.7	CGAGAGCUAC
1-CAASAGCAAC	STREME-1	cds_PVP01_0709600.1	2901	2910	.	12.7	CGAGAGCUAC
1-CAASAGCAAC	STREME-1	cds_PVP01_0604700.1	2659	2668	.	12.7	CGAGAGCUAC
1-CAASAGCAAC	STREME-1	cds_PVP01_0916600.1	1084	1093	.	12.68	CGAGAUCAUC
1-CAASAGCAAC	STREME-1	cds_PVP01_1346500.1	48	57	.	12.68	CGAGAUCAUC
1-CAASAGCAAC	STREME-1	cds_PVP01_0907900.1	2061	2070	.	12.68	CGAGAUCAUC
1-CAASAGCAAC	STREME-1	cds_PVP01_1141300.1	1920	1929	.	12.68	CGAGAUCAUC
1-CAASAGCAAC	STREME-1	cds_PVP01_0210400.1	3027	3036	.	12.68	CGAGAUCAUC
1-CAASAGCAAC	STREME-1	cds_PVP01_0316400.1	657	666	.	12.68	CGAGAUCAUC
1-CAASAGCAAC	STREME-1	cds_PVP01_1329500.1	3147	3156	.	12.63	CGAGAUCUAC
1-CAASAGCAAC	STREME-1	cds_PVP01_1120100.1	1689	1698	.	12.6	CAAGAGUAAC
1-CAASAGCAAC	STREME-1	cds_PVP01_1306100.1	6923	6932	.	12.6	CAAGAGUAAC
1-CAASAGCAAC	STREME-1	cds_PVP01_1139900.1	8598	8607	.	12.6	CAAGAGUAAC
1-CAASAGCAAC	STREME-1	cds_PVP01_0118100.1	3795	3804	.	12.6	CAAGAGUAAC
1-CAASAGCAAC	STREME-1	cds_PVP01_1343700.1	1467	1476	.	12.58	CGAUAGCAUC
1-CAASAGCAAC	STREME-1	cds_PVP01_0105700.1	6457	6466	.	12.57	CAACAGCCAC
1-CAASAGCAAC	STREME-1	cds_PVP01_0105700.1	6475	6484	.	12.57	CAACAGCCAC
1-CAASAGCAAC	STREME-1	cds_PVP01_0105700.1	6493	6502	.	12.57	CAACAGCCAC
1-CAASAGCAAC	STREME-1	cds_PVP01_0105700.1	6511	6520	.	12.57	CAACAGCCAC
1-CAASAGCAAC	STREME-1	cds_PVP01_0105700.1	6529	6538	.	12.57	CAACAGCCAC
1-CAASAGCAAC	STREME-1	cds_PVP01_1033900.1	1864	1873	.	12.57	CAACAGCCAC
1-CAASAGCAAC	STREME-1	cds_PVP01_1442400.1	2478	2487	.	12.57	CAACAGCCAC
1-CAASAGCAAC	STREME-1	cds_PVP01_0519800.1	1430	1439	.	12.57	CAACAGCCAC
1-CAASAGCAAC	STREME-1	cds_PVP01_0731500.1	4082	4091	.	12.46	CGACAUCAUC
1-CAASAGCAAC	STREME-1	cds_PVP01_0610200.1	2134	2143	.	12.46	CGACAUCAUC
1-CAASAGCAAC	STREME-1	cds_PVP01_1448000.1	240	249	.	12.46	CGACAUCAUC
1-CAASAGCAAC	STREME-1	cds_PVP01_1217000.1	1500	1509	.	12.46	CGACAUCAUC
1-CAASAGCAAC	STREME-1	cds_PVP01_1130500.1	552	561	.	12.46	CGACAUCAUC
1-CAASAGCAAC	STREME-1	cds_PVP01_0316400.1	1482	1491	.	12.46	CGACAUCAUC
1-CAASAGCAAC	STREME-1	cds_PVP01_1022500.1	5514	5523	.	12.41	CGACAUCUAC
1-CAASAGCAAC	STREME-1	cds_PVP01_1312200.1	660	669	.	12.41	CGACAUCUAC
1-CAASAGCAAC	STREME-1	cds_PVP01_1428700.1	3864	3873	.	12.41	CGACAUCUAC
1-CAASAGCAAC	STREME-1	cds_PVP01_1023900.1	5760	5769	.	12.41	CGACAUCUAC
1-CAASAGCAAC	STREME-1	cds_PVP01_1447000.1	6225	6234	.	12.41	CGACAUCUAC
1-CAASAGCAAC	STREME-1	cds_PVP01_1251300.1	2271	2280	.	12.41	CGACAUCUAC
1-CAASAGCAAC	STREME-1	cds_PVP01_1113900.1	4263	4272	.	12.41	CGACAUCUAC
1-CAASAGCAAC	STREME-1	cds_PVP01_0521100.1	14	23	.	12.4	CGCUAGCAAC
1-CAASAGCAAC	STREME-1	cds_PVP01_1201600.1	726	735	.	12.4	CGCUAGCAAC
1-CAASAGCAAC	STREME-1	cds_PVP01_1316000.1	3696	3705	.	12.4	CGCUAGCAAC
1-CAASAGCAAC	STREME-1	cds_PVP01_1131100.1	825	834	.	12.4	CGCUAGCAAC
1-CAASAGCAAC	STREME-1	cds_PVP01_0417300.1	2001	2010	.	12.39	CAAGAGCCAC
1-CAASAGCAAC	STREME-1	cds_PVP01_0208800.1	2055	2064	.	12.39	CAAGAGCCAC
1-CAASAGCAAC	STREME-1	cds_PVP01_1305400.1	1542	1551	.	12.39	CAAGAGCCAC
1-CAASAGCAAC	STREME-1	cds_PVP01_1033900.1	1948	1957	.	12.39	CAAGAGCCAC
1-CAASAGCAAC	STREME-1	cds_PVP01_1033900.1	2515	2524	.	12.39	CAAGAGCCAC
1-CAASAGCAAC	STREME-1	cds_PVP01_1033900.1	2533	2542	.	12.39	CAAGAGCCAC
1-CAASAGCAAC	STREME-1	cds_PVP01_1438700.1	327	336	.	12.39	CAAGAGCCAC
1-CAASAGCAAC	STREME-1	cds_PVP01_0714800.1	5572	5581	.	12.39	CAAGAGCCAC
1-CAASAGCAAC	STREME-1	cds_PVP01_1104900.1	747	756	.	12.39	CAAGAGCCAC
1-CAASAGCAAC	STREME-1	cds_PVP01_0308400.1	1186	1195	.	12.39	CAAGAGCCAC
1-CAASAGCAAC	STREME-1	cds_PVP01_1004800.1	2172	2181	.	12.39	CAAGAGCCAC
1-CAASAGCAAC	STREME-1	cds_PVP01_1123500.1	1431	1440	.	12.39	CAAGAGCCAC
1-CAASAGCAAC	STREME-1	cds_PVP01_1211700.1	159	168	.	12.38	CAAUAGUAAC
1-CAASAGCAAC	STREME-1	cds_PVP01_0000190.1	525	534	.	12.38	CAAUAGUAAC
1-CAASAGCAAC	STREME-1	cds_PVP01_0701100.1	3956	3965	.	12.38	CAAUAGUAAC
1-CAASAGCAAC	STREME-1	cds_PVP01_1264300.1	6748	6757	.	12.36	CGACAGCGAC
1-CAASAGCAAC	STREME-1	cds_PVP01_1318000.1	1542	1551	.	12.36	CGACAGCGAC
1-CAASAGCAAC	STREME-1	cds_PVP01_1104900.1	720	729	.	12.36	CGACAGCGAC
1-CAASAGCAAC	STREME-1	cds_PVP01_1147700.1	1113	1122	.	12.36	CGACAGCGAC
1-CAASAGCAAC	STREME-1	cds_PVP01_1215100.1	1785	1794	.	12.36	CGACAGCGAC
1-CAASAGCAAC	STREME-1	cds_PVP01_1139900.1	10281	10290	.	12.36	CGACAGCGAC
1-CAASAGCAAC	STREME-1	cds_PVP01_0529800.1	8049	8058	.	12.34	CGAGAGCAUC
1-CAASAGCAAC	STREME-1	cds_PVP01_1309100.1	435	444	.	12.34	CGAGAGCAUC
1-CAASAGCAAC	STREME-1	cds_PVP01_0311300.1	2460	2469	.	12.34	CGAGAGCAUC
1-CAASAGCAAC	STREME-1	cds_PVP01_1017200.1	6021	6030	.	12.34	CGAGAGCAUC
1-CAASAGCAAC	STREME-1	cds_PVP01_1260500.1	237	246	.	12.34	CGAGAGCAUC
1-CAASAGCAAC	STREME-1	cds_PVP01_1228700.1	201	210	.	12.34	CGAGAGCAUC
1-CAASAGCAAC	STREME-1	cds_PVP01_1404700.1	20712	20721	.	12.34	CGAGAGCAUC
1-CAASAGCAAC	STREME-1	cds_PVP01_1256500.1	4419	4428	.	12.32	CAAUUGCAAC
1-CAASAGCAAC	STREME-1	cds_PVP01_0623600.1	962	971	.	12.32	CAAUUGCAAC
1-CAASAGCAAC	STREME-1	cds_PVP01_0416800.1	1596	1605	.	12.32	CAAUUGCAAC
1-CAASAGCAAC	STREME-1	cds_PVP01_1308000.1	1902	1911	.	12.32	CAAUUGCAAC
1-CAASAGCAAC	STREME-1	cds_PVP01_1313300.1	5916	5925	.	12.32	CAAUUGCAAC
1-CAASAGCAAC	STREME-1	cds_PVP01_1135300.1	9435	9444	.	12.28	CGAGAUCGAC
1-CAASAGCAAC	STREME-1	cds_PVP01_1328600.1	705	714	.	12.28	CGAGAUCGAC
1-CAASAGCAAC	STREME-1	cds_PVP01_0936900.1	8988	8997	.	12.28	CGAGAUCGAC
1-CAASAGCAAC	STREME-1	cds_PVP01_1139900.1	5547	5556	.	12.28	CGAGAUCGAC
1-CAASAGCAAC	STREME-1	cds_PVP01_1450900.1	1377	1386	.	12.28	CGCGAUCAAC
1-CAASAGCAAC	STREME-1	cds_PVP01_0941100.1	267	276	.	12.28	CGCGAUCAAC
1-CAASAGCAAC	STREME-1	cds_PVP01_1418000.1	873	882	.	12.22	CAAUAUCAUC
1-CAASAGCAAC	STREME-1	cds_PVP01_0505800.1	1299	1308	.	12.22	CAAUAUCAUC
1-CAASAGCAAC	STREME-1	cds_PVP01_1402400.1	1974	1983	.	12.22	CAAUAUCAUC
1-CAASAGCAAC	STREME-1	cds_PVP01_1271200.1	218	227	.	12.22	CUAGAUCUAC
1-CAASAGCAAC	STREME-1	cds_PVP01_1136900.1	1275	1284	.	12.19	CGCCAGCAAC
1-CAASAGCAAC	STREME-1	cds_PVP01_1022500.1	30111	30120	.	12.19	CGCCAGCAAC
1-CAASAGCAAC	STREME-1	cds_PVP01_0105700.1	157	166	.	12.19	CGCCAGCAAC
1-CAASAGCAAC	STREME-1	cds_PVP01_0310100.1	2511	2520	.	12.19	CGCCAGCAAC
1-CAASAGCAAC	STREME-1	cds_PVP01_0913800.1	3741	3750	.	12.19	CGCCAGCAAC
1-CAASAGCAAC	STREME-1	cds_PVP01_0517200.1	1101	1110	.	12.19	CGCCAGCAAC
1-CAASAGCAAC	STREME-1	cds_PVP01_0724600.1	7938	7947	.	12.19	CGCCAGCAAC
1-CAASAGCAAC	STREME-1	cds_PVP01_1124900.1	8250	8259	.	12.19	CGCCAGCAAC
1-CAASAGCAAC	STREME-1	cds_PVP01_1124900.1	8286	8295	.	12.19	CGCCAGCAAC
1-CAASAGCAAC	STREME-1	cds_PVP01_1124900.1	8322	8331	.	12.19	CGCCAGCAAC
1-CAASAGCAAC	STREME-1	cds_PVP01_0927400.1	730	739	.	12.19	CGCCAGCAAC
1-CAASAGCAAC	STREME-1	cds_PVP01_1022500.1	6486	6495	.	12.18	CAAUAUCUAC
1-CAASAGCAAC	STREME-1	cds_PVP01_0214800.1	5049	5058	.	12.18	CAGUAGCAAC
1-CAASAGCAAC	STREME-1	cds_PVP01_0106700.1	669	678	.	12.18	CAGUAGCAAC
1-CAASAGCAAC	STREME-1	cds_PVP01_1022500.1	2376	2385	.	12.18	CAGUAGCAAC
1-CAASAGCAAC	STREME-1	cds_PVP01_1022500.1	19710	19719	.	12.18	CAGUAGCAAC
1-CAASAGCAAC	STREME-1	cds_PVP01_1266600.1	216	225	.	12.18	CAGUAGCAAC
1-CAASAGCAAC	STREME-1	cds_PVP01_1107800.1	4626	4635	.	12.18	CAGUAGCAAC
1-CAASAGCAAC	STREME-1	cds_PVP01_1238700.1	4821	4830	.	12.18	CAGUAGCAAC
1-CAASAGCAAC	STREME-1	cds_PVP01_1428700.1	3711	3720	.	12.18	CAGUAGCAAC
1-CAASAGCAAC	STREME-1	cds_PVP01_1267500.1	411	420	.	12.18	CAGUAGCAAC
1-CAASAGCAAC	STREME-1	cds_PVP01_0604200.1	4530	4539	.	12.18	CAGUAGCAAC
1-CAASAGCAAC	STREME-1	cds_PVP01_1471900.1	674	683	.	12.18	CAGUAGCAAC
1-CAASAGCAAC	STREME-1	cds_PVP01_0807700.1	399	408	.	12.18	CAGUAGCAAC
1-CAASAGCAAC	STREME-1	cds_PVP01_0807700.1	414	423	.	12.18	CAGUAGCAAC
1-CAASAGCAAC	STREME-1	cds_PVP01_0807700.1	2655	2664	.	12.18	CAGUAGCAAC
1-CAASAGCAAC	STREME-1	cds_PVP01_0939400.1	2283	2292	.	12.18	CAGUAGCAAC
1-CAASAGCAAC	STREME-1	cds_PVP01_1472100.1	542	551	.	12.18	CAGUAGCAAC
1-CAASAGCAAC	STREME-1	cds_PVP01_0620700.1	336	345	.	12.18	CAGUAGCAAC
1-CAASAGCAAC	STREME-1	cds_PVP01_0603500.1	1464	1473	.	12.18	CAGUAGCAAC
1-CAASAGCAAC	STREME-1	cds_PVP01_1455600.1	3114	3123	.	12.18	CAGUAGCAAC
1-CAASAGCAAC	STREME-1	cds_PVP01_0311300.1	4029	4038	.	12.11	CGACUUCAAC
1-CAASAGCAAC	STREME-1	cds_PVP01_1458300.1	2023	2032	.	12.11	CGACUUCAAC
1-CAASAGCAAC	STREME-1	cds_PVP01_1439300.1	1749	1758	.	12.11	CGACUUCAAC
1-CAASAGCAAC	STREME-1	cds_PVP01_0732200.1	186	195	.	12.11	CGACUUCAAC
1-CAASAGCAAC	STREME-1	cds_PVP01_0732200.1	201	210	.	12.11	CGACUUCAAC
1-CAASAGCAAC	STREME-1	cds_PVP01_0732200.1	216	225	.	12.11	CGACUUCAAC
1-CAASAGCAAC	STREME-1	cds_PVP01_0732200.1	231	240	.	12.11	CGACUUCAAC
1-CAASAGCAAC	STREME-1	cds_PVP01_0732200.1	246	255	.	12.11	CGACUUCAAC
1-CAASAGCAAC	STREME-1	cds_PVP01_0732200.1	3792	3801	.	12.11	CGACUUCAAC
1-CAASAGCAAC	STREME-1	cds_PVP01_1238700.1	4689	4698	.	12.11	CGACUUCAAC
1-CAASAGCAAC	STREME-1	cds_PVP01_0410100.1	2366	2375	.	12.11	CGACUUCAAC
1-CAASAGCAAC	STREME-1	cds_PVP01_1132000.1	572	581	.	12.11	CGACUUCAAC
1-CAASAGCAAC	STREME-1	cds_PVP01_1130500.1	3570	3579	.	12.11	CGACUUCAAC
1-CAASAGCAAC	STREME-1	cds_PVP01_0418200.1	29	38	.	12.11	CGACUUCAAC
1-CAASAGCAAC	STREME-1	cds_PVP01_0316400.1	4488	4497	.	12.11	CGACUUCAAC
1-CAASAGCAAC	STREME-1	cds_PVP01_0203800.1	2112	2121	.	12.1	CGAGACCAAC
1-CAASAGCAAC	STREME-1	cds_PVP01_0105300.1	1275	1284	.	12.1	CGAGACCAAC
1-CAASAGCAAC	STREME-1	cds_PVP01_1445600.1	1866	1875	.	12.1	CGAGACCAAC
1-CAASAGCAAC	STREME-1	cds_PVP01_0712800.1	693	702	.	12.1	CGAGACCAAC
1-CAASAGCAAC	STREME-1	cds_PVP01_1022500.1	4572	4581	.	12.09	CGAUAGCGAC
1-CAASAGCAAC	STREME-1	cds_PVP01_1022500.1	30849	30858	.	12.09	CGAUAGCGAC
1-CAASAGCAAC	STREME-1	cds_PVP01_0529300.1	9063	9072	.	12.09	CGAUAGCGAC
1-CAASAGCAAC	STREME-1	cds_PVP01_0919300.1	1137	1146	.	12.09	CGAUAGCGAC
1-CAASAGCAAC	STREME-1	cds_PVP01_0834700.1	7911	7920	.	12.09	CGAUAGCGAC
1-CAASAGCAAC	STREME-1	cds_PVP01_1318000.1	1536	1545	.	12.09	CGAUAGCGAC
1-CAASAGCAAC	STREME-1	cds_PVP01_1217200.1	6186	6195	.	12.09	CGAUAGCGAC
1-CAASAGCAAC	STREME-1	cds_PVP01_1263600.1	6	15	.	12.09	CGAUAGCGAC
1-CAASAGCAAC	STREME-1	cds_PVP01_0814200.1	3486	3495	.	12.09	CGAUAGCGAC
1-CAASAGCAAC	STREME-1	cds_PVP01_0610000.1	3048	3057	.	12.09	CGAUAGCGAC
1-CAASAGCAAC	STREME-1	cds_PVP01_1002900.1	3924	3933	.	12.09	CGAUAGCGAC
1-CAASAGCAAC	STREME-1	cds_PVP01_1225400.1	5907	5916	.	12.06	CGACAUCGAC
1-CAASAGCAAC	STREME-1	cds_PVP01_0520500.1	1071	1080	.	12.06	CGACAUCGAC
1-CAASAGCAAC	STREME-1	cds_PVP01_1267000.1	5517	5526	.	12.06	CGACAUCGAC
1-CAASAGCAAC	STREME-1	cds_PVP01_1308500.1	672	681	.	12.06	CGACAUCGAC
1-CAASAGCAAC	STREME-1	cds_PVP01_0110400.1	6708	6717	.	12.01	CGAGUGCAAC
1-CAASAGCAAC	STREME-1	cds_PVP01_1119800.1	10738	10747	.	12.01	CGAGUGCAAC
1-CAASAGCAAC	STREME-1	cds_PVP01_0809700.1	1509	1518	.	12.01	CGAGUGCAAC
1-CAASAGCAAC	STREME-1	cds_PVP01_0525700.1	66	75	.	12.01	CGAGUGCAAC
1-CAASAGCAAC	STREME-1	cds_PVP01_1340300.1	15876	15885	.	12.01	CGAGUGCAAC
1-CAASAGCAAC	STREME-1	cds_PVP01_0936900.1	9069	9078	.	12.01	CGAGUGCAAC
1-CAASAGCAAC	STREME-1	cds_PVP01_0611100.1	1269	1278	.	12.01	CGAGUGCAAC
1-CAASAGCAAC	STREME-1	cds_PVP01_1135300.1	11724	11733	.	11.98	CAGGAUCAAC
1-CAASAGCAAC	STREME-1	cds_PVP01_0306000.1	1803	1812	.	11.98	CAGGAUCAAC
1-CAASAGCAAC	STREME-1	cds_PVP01_1250100.1	81	90	.	11.98	CAGGAUCAAC
1-CAASAGCAAC	STREME-1	cds_PVP01_1022500.1	24906	24915	.	11.96	CAAGAUCCAC
1-CAASAGCAAC	STREME-1	cds_PVP01_1445400.1	3405	3414	.	11.96	CAAGAUCCAC
1-CAASAGCAAC	STREME-1	cds_PVP01_1238400.1	1281	1290	.	11.94	CGCGAGCAAC
1-CAASAGCAAC	STREME-1	cds_PVP01_1017200.1	3735	3744	.	11.94	CGCGAGCAAC
1-CAASAGCAAC	STREME-1	cds_PVP01_1112300.1	4356	4365	.	11.94	CGCGAGCAAC
1-CAASAGCAAC	STREME-1	cds_PVP01_1025500.1	138	147	.	11.94	CGCGAGCAAC
1-CAASAGCAAC	STREME-1	cds_PVP01_1011500.1	18719	18728	.	11.94	CGCGAGCAAC
1-CAASAGCAAC	STREME-1	cds_PVP01_1135500.1	461	470	.	11.94	CGCGAGCAAC
1-CAASAGCAAC	STREME-1	cds_PVP01_1137400.1	840	849	.	11.94	CGCGAGCAAC
1-CAASAGCAAC	STREME-1	cds_PVP01_1008600.1	4384	4393	.	11.94	CGCGAGCAAC
1-CAASAGCAAC	STREME-1	cds_PVP01_1306100.1	1419	1428	.	11.94	CGCGAGCAAC
1-CAASAGCAAC	STREME-1	cds_PVP01_1134800.1	1161	1170	.	11.94	CGCGAGCAAC
1-CAASAGCAAC	STREME-1	cds_PVP01_1130500.1	1095	1104	.	11.94	CGCGAGCAAC
1-CAASAGCAAC	STREME-1	cds_PVP01_1238900.1	2188	2197	.	11.92	CGAGUUCAAC
1-CAASAGCAAC	STREME-1	cds_PVP01_1234200.1	1191	1200	.	11.92	CGAGUUCAAC
1-CAASAGCAAC	STREME-1	cds_PVP01_0814700.1	657	666	.	11.89	CUAUAUCAAC
1-CAASAGCAAC	STREME-1	cds_PVP01_1105600.1	840	849	.	11.87	CACUAGCUAC
1-CAASAGCAAC	STREME-1	cds_PVP01_1208400.1	4714	4723	.	11.87	CUAGAUCGAC
1-CAASAGCAAC	STREME-1	cds_PVP01_1270500.1	1290	1299	.	11.86	CGACAGUAAC
1-CAASAGCAAC	STREME-1	cds_PVP01_1147000.1	1119	1128	.	11.86	CGACAGUAAC
1-CAASAGCAAC	STREME-1	cds_PVP01_1439600.1	211	220	.	11.86	CGACAGUAAC
1-CAASAGCAAC	STREME-1	cds_PVP01_1215100.1	1749	1758	.	11.86	CGACAGUAAC
1-CAASAGCAAC	STREME-1	cds_PVP01_1106300.1	513	522	.	11.86	CGACAGUAAC
1-CAASAGCAAC	STREME-1	cds_PVP01_1113900.1	4386	4395	.	11.86	CGACAGUAAC
1-CAASAGCAAC	STREME-1	cds_PVP01_0616500.1	144	153	.	11.86	CGACAGUAAC
1-CAASAGCAAC	STREME-1	cds_PVP01_1228700.1	2046	2055	.	11.86	CGAGAGCGAC
1-CAASAGCAAC	STREME-1	cds_PVP01_0716300.1	1941	1950	.	11.86	CGAGAGCGAC
1-CAASAGCAAC	STREME-1	cds_PVP01_1320900.1	580	589	.	11.86	CGAGAGCGAC
1-CAASAGCAAC	STREME-1	cds_PVP01_0821300.1	225	234	.	11.86	CGAGAGCGAC
1-CAASAGCAAC	STREME-1	cds_PVP01_1227100.1	3507	3516	.	11.86	CGAGAGCGAC
1-CAASAGCAAC	STREME-1	cds_PVP01_1141300.1	4719	4728	.	11.86	CGAGAGCGAC
1-CAASAGCAAC	STREME-1	cds_PVP01_0611800.1	1461	1470	.	11.86	CGAGAGCGAC
1-CAASAGCAAC	STREME-1	cds_PVP01_1306100.1	765	774	.	11.86	CGAGAGCGAC
1-CAASAGCAAC	STREME-1	cds_PVP01_0915900.1	1287	1296	.	11.86	CGAGAGCGAC
1-CAASAGCAAC	STREME-1	cds_PVP01_1419600.1	2196	2205	.	11.84	CGACACCAAC
1-CAASAGCAAC	STREME-1	cds_PVP01_1312500.1	1061	1070	.	11.84	CGACACCAAC
1-CAASAGCAAC	STREME-1	cds_PVP01_1313300.1	1425	1434	.	11.84	CGACACCAAC
1-CAASAGCAAC	STREME-1	cds_PVP01_0118100.1	7644	7653	.	11.84	CGACACCAAC
1-CAASAGCAAC	STREME-1	cds_PVP01_1022500.1	20652	20661	.	11.8	CGCCAUCAAC
1-CAASAGCAAC	STREME-1	cds_PVP01_0928700.1	5034	5043	.	11.8	CGCCAUCAAC
1-CAASAGCAAC	STREME-1	cds_PVP01_0814700.1	2511	2520	.	11.8	CGCCAUCAAC
1-CAASAGCAAC	STREME-1	cds_PVP01_0606900.1	10987	10996	.	11.8	CGCCAUCAAC
1-CAASAGCAAC	STREME-1	cds_PVP01_0931600.1	1431	1440	.	11.8	CGCCAUCAAC
1-CAASAGCAAC	STREME-1	cds_PVP01_0827800.1	1113	1122	.	11.8	CGCCAUCAAC
1-CAASAGCAAC	STREME-1	cds_PVP01_1209200.1	1158	1167	.	11.8	CGCCAUCAAC
1-CAASAGCAAC	STREME-1	cds_PVP01_0213800.1	6711	6720	.	11.76	CAGCAGCAAC
1-CAASAGCAAC	STREME-1	cds_PVP01_0529800.1	711	720	.	11.76	CAGCAGCAAC
1-CAASAGCAAC	STREME-1	cds_PVP01_0529800.1	747	756	.	11.76	CAGCAGCAAC
1-CAASAGCAAC	STREME-1	cds_PVP01_0529800.1	4683	4692	.	11.76	CAGCAGCAAC
1-CAASAGCAAC	STREME-1	cds_PVP01_0529800.1	8746	8755	.	11.76	CAGCAGCAAC
1-CAASAGCAAC	STREME-1	cds_PVP01_0616600.1	150	159	.	11.76	CAGCAGCAAC
1-CAASAGCAAC	STREME-1	cds_PVP01_0106700.1	3099	3108	.	11.76	CAGCAGCAAC
1-CAASAGCAAC	STREME-1	cds_PVP01_0106700.1	4467	4476	.	11.76	CAGCAGCAAC
1-CAASAGCAAC	STREME-1	cds_PVP01_0106700.1	4551	4560	.	11.76	CAGCAGCAAC
1-CAASAGCAAC	STREME-1	cds_PVP01_1022500.1	11805	11814	.	11.76	CAGCAGCAAC
1-CAASAGCAAC	STREME-1	cds_PVP01_1022500.1	31941	31950	.	11.76	CAGCAGCAAC
1-CAASAGCAAC	STREME-1	cds_PVP01_0928700.1	6477	6486	.	11.76	CAGCAGCAAC
1-CAASAGCAAC	STREME-1	cds_PVP01_1107800.1	5265	5274	.	11.76	CAGCAGCAAC
1-CAASAGCAAC	STREME-1	cds_PVP01_0104300.1	6645	6654	.	11.76	CAGCAGCAAC
1-CAASAGCAAC	STREME-1	cds_PVP01_1445400.1	2859	2868	.	11.76	CAGCAGCAAC
1-CAASAGCAAC	STREME-1	cds_PVP01_1135300.1	11301	11310	.	11.76	CAGCAGCAAC
1-CAASAGCAAC	STREME-1	cds_PVP01_0010200.1	32	41	.	11.76	CAGCAGCAAC
1-CAASAGCAAC	STREME-1	cds_PVP01_0010200.1	473	482	.	11.76	CAGCAGCAAC
1-CAASAGCAAC	STREME-1	cds_PVP01_1139300.1	3204	3213	.	11.76	CAGCAGCAAC
1-CAASAGCAAC	STREME-1	cds_PVP01_1112300.1	1419	1428	.	11.76	CAGCAGCAAC
1-CAASAGCAAC	STREME-1	cds_PVP01_1439300.1	4329	4338	.	11.76	CAGCAGCAAC
1-CAASAGCAAC	STREME-1	cds_PVP01_1210500.1	2085	2094	.	11.76	CAGCAGCAAC
1-CAASAGCAAC	STREME-1	cds_PVP01_1229200.1	1494	1503	.	11.76	CAGCAGCAAC
1-CAASAGCAAC	STREME-1	cds_PVP01_0732200.1	2127	2136	.	11.76	CAGCAGCAAC
1-CAASAGCAAC	STREME-1	cds_PVP01_0213600.1	885	894	.	11.76	CAGCAGCAAC
1-CAASAGCAAC	STREME-1	cds_PVP01_0834700.1	3180	3189	.	11.76	CAGCAGCAAC
1-CAASAGCAAC	STREME-1	cds_PVP01_0814700.1	3726	3735	.	11.76	CAGCAGCAAC
1-CAASAGCAAC	STREME-1	cds_PVP01_0814700.1	3787	3796	.	11.76	CAGCAGCAAC
1-CAASAGCAAC	STREME-1	cds_PVP01_0814700.1	4471	4480	.	11.76	CAGCAGCAAC
1-CAASAGCAAC	STREME-1	cds_PVP01_0814700.1	5854	5863	.	11.76	CAGCAGCAAC
1-CAASAGCAAC	STREME-1	cds_PVP01_1209900.1	2346	2355	.	11.76	CAGCAGCAAC
1-CAASAGCAAC	STREME-1	cds_PVP01_1025100.1	717	726	.	11.76	CAGCAGCAAC
1-CAASAGCAAC	STREME-1	cds_PVP01_1011500.1	4656	4665	.	11.76	CAGCAGCAAC
1-CAASAGCAAC	STREME-1	cds_PVP01_1011500.1	11999	12008	.	11.76	CAGCAGCAAC
1-CAASAGCAAC	STREME-1	cds_PVP01_0708200.1	1836	1845	.	11.76	CAGCAGCAAC
1-CAASAGCAAC	STREME-1	cds_PVP01_0606900.1	9661	9670	.	11.76	CAGCAGCAAC
1-CAASAGCAAC	STREME-1	cds_PVP01_0204500.1	1878	1887	.	11.76	CAGCAGCAAC
1-CAASAGCAAC	STREME-1	cds_PVP01_0604200.1	6070	6079	.	11.76	CAGCAGCAAC
1-CAASAGCAAC	STREME-1	cds_PVP01_0604200.1	6274	6283	.	11.76	CAGCAGCAAC
1-CAASAGCAAC	STREME-1	cds_PVP01_0417500.1	1092	1101	.	11.76	CAGCAGCAAC
1-CAASAGCAAC	STREME-1	cds_PVP01_1257500.1	1085	1094	.	11.76	CAGCAGCAAC
1-CAASAGCAAC	STREME-1	cds_PVP01_1257500.1	1739	1748	.	11.76	CAGCAGCAAC
1-CAASAGCAAC	STREME-1	cds_PVP01_0918500.1	990	999	.	11.76	CAGCAGCAAC
1-CAASAGCAAC	STREME-1	cds_PVP01_1423300.1	1086	1095	.	11.76	CAGCAGCAAC
1-CAASAGCAAC	STREME-1	cds_PVP01_0802800.1	2409	2418	.	11.76	CAGCAGCAAC
1-CAASAGCAAC	STREME-1	cds_PVP01_0416800.1	2657	2666	.	11.76	CAGCAGCAAC
1-CAASAGCAAC	STREME-1	cds_PVP01_1227800.1	5930	5939	.	11.76	CAGCAGCAAC
1-CAASAGCAAC	STREME-1	cds_PVP01_1227800.1	8426	8435	.	11.76	CAGCAGCAAC
1-CAASAGCAAC	STREME-1	cds_PVP01_0709600.1	1956	1965	.	11.76	CAGCAGCAAC
1-CAASAGCAAC	STREME-1	cds_PVP01_1442500.1	2245	2254	.	11.76	CAGCAGCAAC
1-CAASAGCAAC	STREME-1	cds_PVP01_0531900.1	177	186	.	11.76	CAGCAGCAAC
1-CAASAGCAAC	STREME-1	cds_PVP01_1203100.1	3033	3042	.	11.76	CAGCAGCAAC
1-CAASAGCAAC	STREME-1	cds_PVP01_0937100.1	2054	2063	.	11.76	CAGCAGCAAC
1-CAASAGCAAC	STREME-1	cds_PVP01_0210400.1	10825	10834	.	11.76	CAGCAGCAAC
1-CAASAGCAAC	STREME-1	cds_PVP01_1306100.1	6231	6240	.	11.76	CAGCAGCAAC
1-CAASAGCAAC	STREME-1	cds_PVP01_0807700.1	951	960	.	11.76	CAGCAGCAAC
1-CAASAGCAAC	STREME-1	cds_PVP01_0513800.1	1710	1719	.	11.76	CAGCAGCAAC
1-CAASAGCAAC	STREME-1	cds_PVP01_1442700.1	711	720	.	11.76	CAGCAGCAAC
1-CAASAGCAAC	STREME-1	cds_PVP01_0724600.1	5316	5325	.	11.76	CAGCAGCAAC
1-CAASAGCAAC	STREME-1	cds_PVP01_0724600.1	6996	7005	.	11.76	CAGCAGCAAC
1-CAASAGCAAC	STREME-1	cds_PVP01_0616500.1	1794	1803	.	11.76	CAGCAGCAAC
1-CAASAGCAAC	STREME-1	cds_PVP01_1447300.1	2902	2911	.	11.76	CAGCAGCAAC
1-CAASAGCAAC	STREME-1	cds_PVP01_1144400.1	3525	3534	.	11.76	CAGCAGCAAC
1-CAASAGCAAC	STREME-1	cds_PVP01_1144400.1	3549	3558	.	11.76	CAGCAGCAAC
1-CAASAGCAAC	STREME-1	cds_PVP01_1144400.1	3767	3776	.	11.76	CAGCAGCAAC
1-CAASAGCAAC	STREME-1	cds_PVP01_0212200.1	1968	1977	.	11.76	CAGCAGCAAC
1-CAASAGCAAC	STREME-1	cds_PVP01_0212200.1	7761	7770	.	11.76	CAGCAGCAAC
1-CAASAGCAAC	STREME-1	cds_PVP01_0117000.1	24	33	.	11.76	CAGCAGCAAC
1-CAASAGCAAC	STREME-1	cds_PVP01_0117000.1	282	291	.	11.76	CAGCAGCAAC
1-CAASAGCAAC	STREME-1	cds_PVP01_0611100.1	3444	3453	.	11.76	CAGCAGCAAC
1-CAASAGCAAC	STREME-1	cds_PVP01_0731000.1	513	522	.	11.72	CAAGAUUAAC
1-CAASAGCAAC	STREME-1	cds_PVP01_1023900.1	5079	5088	.	11.72	CAAGAUUAAC
1-CAASAGCAAC	STREME-1	cds_PVP01_1313200.1	579	588	.	11.72	CAAGAUUAAC
1-CAASAGCAAC	STREME-1	cds_PVP01_0217000.1	983	992	.	11.72	CAAGAUUAAC
1-CAASAGCAAC	STREME-1	cds_PVP01_1464800.1	97	106	.	11.72	CAAUACCAAC
1-CAASAGCAAC	STREME-1	cds_PVP01_0927400.1	1057	1066	.	11.72	CAAUACCAAC
1-CAASAGCAAC	STREME-1	cds_PVP01_0000160.1	44	53	.	11.69	CAACUGCUAC
1-CAASAGCAAC	STREME-1	cds_PVP01_1017200.1	7083	7092	.	11.69	CAACUGCUAC
1-CAASAGCAAC	STREME-1	cds_PVP01_0915600.1	2733	2742	.	11.69	CAACUGCUAC
1-CAASAGCAAC	STREME-1	cds_PVP01_1327800.1	285	294	.	11.69	CAACUGCUAC
1-CAASAGCAAC	STREME-1	cds_PVP01_0714800.1	339	348	.	11.69	CAACUGCUAC
1-CAASAGCAAC	STREME-1	cds_PVP01_1208400.1	16281	16290	.	11.69	CAACUGCUAC
1-CAASAGCAAC	STREME-1	cds_PVP01_0708200.1	57	66	.	11.69	CAACUGCUAC
1-CAASAGCAAC	STREME-1	cds_PVP01_1023900.1	3579	3588	.	11.69	CAACUGCUAC
1-CAASAGCAAC	STREME-1	cds_PVP01_1008000.1	882	891	.	11.69	CAACUGCUAC
1-CAASAGCAAC	STREME-1	cds_PVP01_1340300.1	11937	11946	.	11.69	CAACUGCUAC
1-CAASAGCAAC	STREME-1	cds_PVP01_1130500.1	3660	3669	.	11.69	CAACUGCUAC
1-CAASAGCAAC	STREME-1	cds_PVP01_0114800.1	4186	4195	.	11.69	CAACUGCUAC
1-CAASAGCAAC	STREME-1	cds_PVP01_1211000.1	20074	20083	.	11.69	CUAGACCAAC
1-CAASAGCAAC	STREME-1	cds_PVP01_1228300.1	1240	1249	.	11.69	CUAGACCAAC
1-CAASAGCAAC	STREME-1	cds_PVP01_0529800.1	1680	1689	.	11.65	CGACAGCCAC
1-CAASAGCAAC	STREME-1	cds_PVP01_1219800.1	917	926	.	11.65	CGACAGCCAC
1-CAASAGCAAC	STREME-1	cds_PVP01_0319500.1	4539	4548	.	11.65	CGACAGCCAC
1-CAASAGCAAC	STREME-1	cds_PVP01_1033900.1	1828	1837	.	11.65	CGACAGCCAC
1-CAASAGCAAC	STREME-1	cds_PVP01_1033900.1	1846	1855	.	11.65	CGACAGCCAC
1-CAASAGCAAC	STREME-1	cds_PVP01_1033900.1	1882	1891	.	11.65	CGACAGCCAC
1-CAASAGCAAC	STREME-1	cds_PVP01_0610200.1	2644	2653	.	11.65	CGACAGCCAC
1-CAASAGCAAC	STREME-1	cds_PVP01_1025100.1	5295	5304	.	11.65	CGACAGCCAC
1-CAASAGCAAC	STREME-1	cds_PVP01_0920600.1	399	408	.	11.65	CGACAGCCAC
1-CAASAGCAAC	STREME-1	cds_PVP01_0118100.1	3651	3660	.	11.65	CGACAGCCAC
1-CAASAGCAAC	STREME-1	cds_PVP01_0118100.1	3690	3699	.	11.65	CGACAGCCAC
1-CAASAGCAAC	STREME-1	cds_PVP01_0214800.1	4610	4619	.	11.65	CAGGAGCAAC
1-CAASAGCAAC	STREME-1	cds_PVP01_0527700.1	2032	2041	.	11.65	CAGGAGCAAC
1-CAASAGCAAC	STREME-1	cds_PVP01_0529300.1	3909	3918	.	11.65	CAGGAGCAAC
1-CAASAGCAAC	STREME-1	cds_PVP01_1228700.1	1995	2004	.	11.65	CAGGAGCAAC
1-CAASAGCAAC	STREME-1	cds_PVP01_0204500.1	665	674	.	11.65	CAGGAGCAAC
1-CAASAGCAAC	STREME-1	cds_PVP01_0604200.1	2748	2757	.	11.65	CAGGAGCAAC
1-CAASAGCAAC	STREME-1	cds_PVP01_0818400.1	4299	4308	.	11.65	CAGGAGCAAC
1-CAASAGCAAC	STREME-1	cds_PVP01_0720600.1	2934	2943	.	11.65	CAGGAGCAAC
1-CAASAGCAAC	STREME-1	cds_PVP01_1125700.1	3097	3106	.	11.65	CAGGAGCAAC
1-CAASAGCAAC	STREME-1	cds_PVP01_0004290.1	319	328	.	11.65	CAGGAGCAAC
1-CAASAGCAAC	STREME-1	cds_PVP01_0726100.1	825	834	.	11.65	CAGGAGCAAC
1-CAASAGCAAC	STREME-1	cds_PVP01_0822800.1	7051	7060	.	11.65	CAGGAGCAAC
1-CAASAGCAAC	STREME-1	cds_PVP01_1265700.1	1041	1050	.	11.65	CAGGAGCAAC
1-CAASAGCAAC	STREME-1	cds_PVP01_1437100.1	207	216	.	11.65	CAGGAGCAAC
1-CAASAGCAAC	STREME-1	cds_PVP01_0316400.1	477	486	.	11.65	CAGGAGCAAC
1-CAASAGCAAC	STREME-1	cds_PVP01_1123500.1	366	375	.	11.65	CAGGAGCAAC
1-CAASAGCAAC	STREME-1	cds_PVP01_0611100.1	1087	1096	.	11.65	CAGGAGCAAC
1-CAASAGCAAC	STREME-1	cds_PVP01_1022500.1	23103	23112	.	11.62	CAAGAUCAGC
1-CAASAGCAAC	STREME-1	cds_PVP01_1022500.1	27472	27481	.	11.62	CAAGAUCAGC
1-CAASAGCAAC	STREME-1	cds_PVP01_1445400.1	3414	3423	.	11.62	CAAGAUCAGC
1-CAASAGCAAC	STREME-1	cds_PVP01_1101300.1	108	117	.	11.62	CAAGAUCAGC
1-CAASAGCAAC	STREME-1	cds_PVP01_0530100.1	1374	1383	.	11.62	CAAGAUCAGC
1-CAASAGCAAC	STREME-1	cds_PVP01_1325700.1	425	434	.	11.62	CAAGAUCAGC
1-CAASAGCAAC	STREME-1	cds_PVP01_1121400.1	12760	12769	.	11.6	CUAGUGCAAC
1-CAASAGCAAC	STREME-1	cds_PVP01_0925500.1	900	909	.	11.59	CGAUAGUAAC
1-CAASAGCAAC	STREME-1	cds_PVP01_1466900.1	6322	6331	.	11.59	CGAUAGUAAC
1-CAASAGCAAC	STREME-1	cds_PVP01_0415700.1	129	138	.	11.59	CGAUAGUAAC
1-CAASAGCAAC	STREME-1	cds_PVP01_1132900.1	324	333	.	11.54	CAACAACAAC
1-CAASAGCAAC	STREME-1	cds_PVP01_0812200.1	1155	1164	.	11.54	CAACAACAAC
1-CAASAGCAAC	STREME-1	cds_PVP01_1022500.1	31947	31956	.	11.54	CAACAACAAC
1-CAASAGCAAC	STREME-1	cds_PVP01_0717100.1	1620	1629	.	11.54	CAACAACAAC
1-CAASAGCAAC	STREME-1	cds_PVP01_1033900.1	1771	1780	.	11.54	CAACAACAAC
1-CAASAGCAAC	STREME-1	cds_PVP01_1033900.1	1774	1783	.	11.54	CAACAACAAC
1-CAASAGCAAC	STREME-1	cds_PVP01_1033900.1	1777	1786	.	11.54	CAACAACAAC
1-CAASAGCAAC	STREME-1	cds_PVP01_1033900.1	1780	1789	.	11.54	CAACAACAAC
1-CAASAGCAAC	STREME-1	cds_PVP01_1033900.1	1783	1792	.	11.54	CAACAACAAC
1-CAASAGCAAC	STREME-1	cds_PVP01_1033900.1	1786	1795	.	11.54	CAACAACAAC
1-CAASAGCAAC	STREME-1	cds_PVP01_1033900.1	2137	2146	.	11.54	CAACAACAAC
1-CAASAGCAAC	STREME-1	cds_PVP01_1033900.1	2629	2638	.	11.54	CAACAACAAC
1-CAASAGCAAC	STREME-1	cds_PVP01_0912900.1	5634	5643	.	11.54	CAACAACAAC
1-CAASAGCAAC	STREME-1	cds_PVP01_0505400.1	2194	2203	.	11.54	CAACAACAAC
1-CAASAGCAAC	STREME-1	cds_PVP01_0932800.1	1725	1734	.	11.54	CAACAACAAC
1-CAASAGCAAC	STREME-1	cds_PVP01_0511300.1	174	183	.	11.54	CAACAACAAC
1-CAASAGCAAC	STREME-1	cds_PVP01_0703000.1	2532	2541	.	11.54	CAACAACAAC
1-CAASAGCAAC	STREME-1	cds_PVP01_0703000.1	2535	2544	.	11.54	CAACAACAAC
1-CAASAGCAAC	STREME-1	cds_PVP01_0703000.1	2538	2547	.	11.54	CAACAACAAC
1-CAASAGCAAC	STREME-1	cds_PVP01_0703000.1	2541	2550	.	11.54	CAACAACAAC
1-CAASAGCAAC	STREME-1	cds_PVP01_0703000.1	2544	2553	.	11.54	CAACAACAAC
1-CAASAGCAAC	STREME-1	cds_PVP01_0703000.1	2547	2556	.	11.54	CAACAACAAC
1-CAASAGCAAC	STREME-1	cds_PVP01_0703000.1	2550	2559	.	11.54	CAACAACAAC
1-CAASAGCAAC	STREME-1	cds_PVP01_0703000.1	2553	2562	.	11.54	CAACAACAAC
1-CAASAGCAAC	STREME-1	cds_PVP01_0703000.1	2556	2565	.	11.54	CAACAACAAC
1-CAASAGCAAC	STREME-1	cds_PVP01_0703000.1	2559	2568	.	11.54	CAACAACAAC
1-CAASAGCAAC	STREME-1	cds_PVP01_0703000.1	2562	2571	.	11.54	CAACAACAAC
1-CAASAGCAAC	STREME-1	cds_PVP01_0703000.1	2565	2574	.	11.54	CAACAACAAC
1-CAASAGCAAC	STREME-1	cds_PVP01_0703000.1	2568	2577	.	11.54	CAACAACAAC
1-CAASAGCAAC	STREME-1	cds_PVP01_0703000.1	2571	2580	.	11.54	CAACAACAAC
1-CAASAGCAAC	STREME-1	cds_PVP01_0703000.1	2574	2583	.	11.54	CAACAACAAC
1-CAASAGCAAC	STREME-1	cds_PVP01_0703000.1	2577	2586	.	11.54	CAACAACAAC
1-CAASAGCAAC	STREME-1	cds_PVP01_0703000.1	2580	2589	.	11.54	CAACAACAAC
1-CAASAGCAAC	STREME-1	cds_PVP01_0703000.1	3546	3555	.	11.54	CAACAACAAC
1-CAASAGCAAC	STREME-1	cds_PVP01_1454200.1	420	429	.	11.54	CAACAACAAC
1-CAASAGCAAC	STREME-1	cds_PVP01_1454200.1	1017	1026	.	11.54	CAACAACAAC
1-CAASAGCAAC	STREME-1	cds_PVP01_1267500.1	1197	1206	.	11.54	CAACAACAAC
1-CAASAGCAAC	STREME-1	cds_PVP01_1120100.1	882	891	.	11.54	CAACAACAAC
1-CAASAGCAAC	STREME-1	cds_PVP01_1120100.1	909	918	.	11.54	CAACAACAAC
1-CAASAGCAAC	STREME-1	cds_PVP01_0304000.1	11361	11370	.	11.54	CAACAACAAC
1-CAASAGCAAC	STREME-1	cds_PVP01_0102700.1	88	97	.	11.54	CAACAACAAC
1-CAASAGCAAC	STREME-1	cds_PVP01_0102700.1	91	100	.	11.54	CAACAACAAC
1-CAASAGCAAC	STREME-1	cds_PVP01_0102700.1	94	103	.	11.54	CAACAACAAC
1-CAASAGCAAC	STREME-1	cds_PVP01_0102700.1	97	106	.	11.54	CAACAACAAC
1-CAASAGCAAC	STREME-1	cds_PVP01_0102700.1	100	109	.	11.54	CAACAACAAC
1-CAASAGCAAC	STREME-1	cds_PVP01_0102700.1	103	112	.	11.54	CAACAACAAC
1-CAASAGCAAC	STREME-1	cds_PVP01_0102700.1	106	115	.	11.54	CAACAACAAC
1-CAASAGCAAC	STREME-1	cds_PVP01_0734300.1	543	552	.	11.54	CAACAACAAC
1-CAASAGCAAC	STREME-1	cds_PVP01_1137400.1	2931	2940	.	11.54	CAACAACAAC
1-CAASAGCAAC	STREME-1	cds_PVP01_1442500.1	2019	2028	.	11.54	CAACAACAAC
1-CAASAGCAAC	STREME-1	cds_PVP01_0531900.1	732	741	.	11.54	CAACAACAAC
1-CAASAGCAAC	STREME-1	cds_PVP01_0532600.1	81	90	.	11.54	CAACAACAAC
1-CAASAGCAAC	STREME-1	cds_PVP01_0532600.1	84	93	.	11.54	CAACAACAAC
1-CAASAGCAAC	STREME-1	cds_PVP01_0818600.1	1411	1420	.	11.54	CAACAACAAC
1-CAASAGCAAC	STREME-1	cds_PVP01_1110900.1	397	406	.	11.54	CAACAACAAC
1-CAASAGCAAC	STREME-1	cds_PVP01_0728900.1	2173	2182	.	11.54	CAACAACAAC
1-CAASAGCAAC	STREME-1	cds_PVP01_0728900.1	2176	2185	.	11.54	CAACAACAAC
1-CAASAGCAAC	STREME-1	cds_PVP01_0728900.1	2179	2188	.	11.54	CAACAACAAC
1-CAASAGCAAC	STREME-1	cds_PVP01_0516600.1	408	417	.	11.54	CAACAACAAC
1-CAASAGCAAC	STREME-1	cds_PVP01_1203500.1	945	954	.	11.54	CAACAACAAC
1-CAASAGCAAC	STREME-1	cds_PVP01_1014400.1	2220	2229	.	11.54	CAACAACAAC
1-CAASAGCAAC	STREME-1	cds_PVP01_0114600.1	366	375	.	11.53	CGAUUGCAAC
1-CAASAGCAAC	STREME-1	cds_PVP01_1404700.1	23641	23650	.	11.53	CGAUUGCAAC
1-CAASAGCAAC	STREME-1	cds_PVP01_0521100.1	126	135	.	11.46	CAACAGCAGC
1-CAASAGCAAC	STREME-1	cds_PVP01_0529800.1	1869	1878	.	11.46	CAACAGCAGC
1-CAASAGCAAC	STREME-1	cds_PVP01_0931500.1	636	645	.	11.46	CAACAGCAGC
1-CAASAGCAAC	STREME-1	cds_PVP01_0106700.1	4479	4488	.	11.46	CAACAGCAGC
1-CAASAGCAAC	STREME-1	cds_PVP01_1031400.1	422	431	.	11.46	CAACAGCAGC
1-CAASAGCAAC	STREME-1	cds_PVP01_1022500.1	31935	31944	.	11.46	CAACAGCAGC
1-CAASAGCAAC	STREME-1	cds_PVP01_1227700.1	336	345	.	11.46	CAACAGCAGC
1-CAASAGCAAC	STREME-1	cds_PVP01_1135300.1	2908	2917	.	11.46	CAACAGCAGC
1-CAASAGCAAC	STREME-1	cds_PVP01_1135300.1	6939	6948	.	11.46	CAACAGCAGC
1-CAASAGCAAC	STREME-1	cds_PVP01_1139300.1	3201	3210	.	11.46	CAACAGCAGC
1-CAASAGCAAC	STREME-1	cds_PVP01_0834700.1	10713	10722	.	11.46	CAACAGCAGC
1-CAASAGCAAC	STREME-1	cds_PVP01_0814700.1	3784	3793	.	11.46	CAACAGCAGC
1-CAASAGCAAC	STREME-1	cds_PVP01_0814700.1	4477	4486	.	11.46	CAACAGCAGC
1-CAASAGCAAC	STREME-1	cds_PVP01_0814700.1	5866	5875	.	11.46	CAACAGCAGC
1-CAASAGCAAC	STREME-1	cds_PVP01_0707900.1	2841	2850	.	11.46	CAACAGCAGC
1-CAASAGCAAC	STREME-1	cds_PVP01_1011500.1	1350	1359	.	11.46	CAACAGCAGC
1-CAASAGCAAC	STREME-1	cds_PVP01_0945800.1	2865	2874	.	11.46	CAACAGCAGC
1-CAASAGCAAC	STREME-1	cds_PVP01_0708200.1	2946	2955	.	11.46	CAACAGCAGC
1-CAASAGCAAC	STREME-1	cds_PVP01_0703000.1	3495	3504	.	11.46	CAACAGCAGC
1-CAASAGCAAC	STREME-1	cds_PVP01_0703000.1	3552	3561	.	11.46	CAACAGCAGC
1-CAASAGCAAC	STREME-1	cds_PVP01_0204500.1	1872	1881	.	11.46	CAACAGCAGC
1-CAASAGCAAC	STREME-1	cds_PVP01_1267500.1	402	411	.	11.46	CAACAGCAGC
1-CAASAGCAAC	STREME-1	cds_PVP01_0832900.1	639	648	.	11.46	CAACAGCAGC
1-CAASAGCAAC	STREME-1	cds_PVP01_1119800.1	7699	7708	.	11.46	CAACAGCAGC
1-CAASAGCAAC	STREME-1	cds_PVP01_1119800.1	9352	9361	.	11.46	CAACAGCAGC
1-CAASAGCAAC	STREME-1	cds_PVP01_1447000.1	1447	1456	.	11.46	CAACAGCAGC
1-CAASAGCAAC	STREME-1	cds_PVP01_1447000.1	3000	3009	.	11.46	CAACAGCAGC
1-CAASAGCAAC	STREME-1	cds_PVP01_1343100.1	1500	1509	.	11.46	CAACAGCAGC
1-CAASAGCAAC	STREME-1	cds_PVP01_0910900.1	1617	1626	.	11.46	CAACAGCAGC
1-CAASAGCAAC	STREME-1	cds_PVP01_1133600.1	129	138	.	11.46	CAACAGCAGC
1-CAASAGCAAC	STREME-1	cds_PVP01_1442500.1	1819	1828	.	11.46	CAACAGCAGC
1-CAASAGCAAC	STREME-1	cds_PVP01_0532600.1	90	99	.	11.46	CAACAGCAGC
1-CAASAGCAAC	STREME-1	cds_PVP01_1448000.1	765	774	.	11.46	CAACAGCAGC
1-CAASAGCAAC	STREME-1	cds_PVP01_0908600.1	2898	2907	.	11.46	CAACAGCAGC
1-CAASAGCAAC	STREME-1	cds_PVP01_1306100.1	6228	6237	.	11.46	CAACAGCAGC
1-CAASAGCAAC	STREME-1	cds_PVP01_1451400.1	263	272	.	11.46	CAACAGCAGC
1-CAASAGCAAC	STREME-1	cds_PVP01_1265700.1	5157	5166	.	11.46	CAACAGCAGC
1-CAASAGCAAC	STREME-1	cds_PVP01_1134800.1	1167	1176	.	11.46	CAACAGCAGC
1-CAASAGCAAC	STREME-1	cds_PVP01_1134800.1	1449	1458	.	11.46	CAACAGCAGC
1-CAASAGCAAC	STREME-1	cds_PVP01_0728900.1	3791	3800	.	11.46	CAACAGCAGC
1-CAASAGCAAC	STREME-1	cds_PVP01_1329900.1	1191	1200	.	11.46	CAACAGCAGC
1-CAASAGCAAC	STREME-1	cds_PVP01_0516600.1	2451	2460	.	11.46	CAACAGCAGC
1-CAASAGCAAC	STREME-1	cds_PVP01_1144400.1	3546	3555	.	11.46	CAACAGCAGC
1-CAASAGCAAC	STREME-1	cds_PVP01_1014400.1	3414	3423	.	11.46	CAACAGCAGC
1-CAASAGCAAC	STREME-1	cds_PVP01_0114800.1	1680	1689	.	11.46	CAACAGCAGC
1-CAASAGCAAC	STREME-1	cds_PVP01_0118100.1	6000	6009	.	11.46	CAACAGCAGC
1-CAASAGCAAC	STREME-1	cds_PVP01_1022500.1	30882	30891	.	11.44	CGGUAGCAAC
1-CAASAGCAAC	STREME-1	cds_PVP01_1225400.1	3407	3416	.	11.44	CGGUAGCAAC
1-CAASAGCAAC	STREME-1	cds_PVP01_0609100.1	2127	2136	.	11.44	CGGUAGCAAC
1-CAASAGCAAC	STREME-1	cds_PVP01_1457300.1	1752	1761	.	11.44	CGGUAGCAAC
1-CAASAGCAAC	STREME-1	cds_PVP01_0620400.1	1596	1605	.	11.44	CGGUAGCAAC
1-CAASAGCAAC	STREME-1	cds_PVP01_1110800.1	1935	1944	.	11.44	CGGUAGCAAC
1-CAASAGCAAC	STREME-1	cds_PVP01_1447000.1	2613	2622	.	11.44	CGGUAGCAAC
1-CAASAGCAAC	STREME-1	cds_PVP01_0818400.1	4028	4037	.	11.44	CGGUAGCAAC
1-CAASAGCAAC	STREME-1	cds_PVP01_0942800.1	6495	6504	.	11.44	CGGUAGCAAC
1-CAASAGCAAC	STREME-1	cds_PVP01_0942800.1	6870	6879	.	11.44	CGGUAGCAAC
1-CAASAGCAAC	STREME-1	cds_PVP01_1024200.1	1575	1584	.	11.44	CGGUAGCAAC
1-CAASAGCAAC	STREME-1	cds_PVP01_1024200.1	1626	1635	.	11.44	CGGUAGCAAC
1-CAASAGCAAC	STREME-1	cds_PVP01_0419100.1	1080	1089	.	11.43	CGAUAUCAUC
1-CAASAGCAAC	STREME-1	cds_PVP01_0528300.1	15	24	.	11.43	CGAUAUCAUC
1-CAASAGCAAC	STREME-1	cds_PVP01_1143100.1	1413	1422	.	11.43	CGAUAUCAUC
1-CAASAGCAAC	STREME-1	cds_PVP01_1128400.1	3873	3882	.	11.43	CGAUAUCAUC
1-CAASAGCAAC	STREME-1	cds_PVP01_1260700.1	897	906	.	11.43	CGAUAUCAUC
1-CAASAGCAAC	STREME-1	cds_PVP01_0311300.1	3660	3669	.	11.41	CAACAUCCAC
1-CAASAGCAAC	STREME-1	cds_PVP01_0603100.1	1077	1086	.	11.41	CAACAUCCAC
1-CAASAGCAAC	STREME-1	cds_PVP01_1107800.1	2568	2577	.	11.41	CAACAUCCAC
1-CAASAGCAAC	STREME-1	cds_PVP01_1421900.1	5585	5594	.	11.41	CAACAUCCAC
1-CAASAGCAAC	STREME-1	cds_PVP01_0834700.1	300	309	.	11.41	CAACAUCCAC
1-CAASAGCAAC	STREME-1	cds_PVP01_0509300.1	3970	3979	.	11.41	CAACAUCCAC
1-CAASAGCAAC	STREME-1	cds_PVP01_1255000.1	4613	4622	.	11.41	CAACAUCCAC
1-CAASAGCAAC	STREME-1	cds_PVP01_0311300.1	3420	3429	.	11.4	CACCAGCUAC
1-CAASAGCAAC	STREME-1	cds_PVP01_1145100.1	1161	1170	.	11.4	CACCAGCUAC
1-CAASAGCAAC	STREME-1	cds_PVP01_0715400.1	5640	5649	.	11.4	CACCAGCUAC
1-CAASAGCAAC	STREME-1	cds_PVP01_0606900.1	16442	16451	.	11.4	CACCAGCUAC
1-CAASAGCAAC	STREME-1	cds_PVP01_1029200.1	10356	10365	.	11.4	CACCAGCUAC
1-CAASAGCAAC	STREME-1	cds_PVP01_0530000.1	7	16	.	11.4	CACCAGCUAC
1-CAASAGCAAC	STREME-1	cds_PVP01_1142200.1	890	899	.	11.4	CACCAGCUAC
1-CAASAGCAAC	STREME-1	cds_PVP01_1306100.1	4950	4959	.	11.4	CACCAGCUAC
1-CAASAGCAAC	STREME-1	cds_PVP01_1414000.1	5895	5904	.	11.4	CACCAGCUAC
1-CAASAGCAAC	STREME-1	cds_PVP01_0511300.1	51	60	.	11.38	CGAUAUCUAC
1-CAASAGCAAC	STREME-1	cds_PVP01_1343100.1	1436	1445	.	11.38	CGAUAUCUAC
1-CAASAGCAAC	STREME-1	cds_PVP01_0936900.1	8661	8670	.	11.38	CGAUAUCUAC
1-CAASAGCAAC	STREME-1	cds_PVP01_0509600.1	1185	1194	.	11.38	CGAUAGCCAC
1-CAASAGCAAC	STREME-1	cds_PVP01_1266600.1	714	723	.	11.37	CUACAGCUAC
1-CAASAGCAAC	STREME-1	cds_PVP01_1452700.1	1443	1452	.	11.37	CUACAGCUAC
1-CAASAGCAAC	STREME-1	cds_PVP01_0213600.1	3131	3140	.	11.37	CUACAGCUAC
1-CAASAGCAAC	STREME-1	cds_PVP01_0703000.1	1207	1216	.	11.37	CUACAGCUAC
1-CAASAGCAAC	STREME-1	cds_PVP01_1447000.1	7329	7338	.	11.37	CUACAGCUAC
1-CAASAGCAAC	STREME-1	cds_PVP01_0822800.1	246	255	.	11.37	CUACAGCUAC
1-CAASAGCAAC	STREME-1	cds_PVP01_1139900.1	17334	17343	.	11.37	CUACAGCUAC
1-CAASAGCAAC	STREME-1	cds_PVP01_0107700.1	183	192	.	11.37	CUACAGCUAC
1-CAASAGCAAC	STREME-1	cds_PVP01_0316400.1	81	90	.	11.37	CUACAGCUAC
1-CAASAGCAAC	STREME-1	cds_PVP01_0415200.1	1983	1992	.	11.37	CAGCAUCAAC
1-CAASAGCAAC	STREME-1	cds_PVP01_1445400.1	720	729	.	11.37	CAGCAUCAAC
1-CAASAGCAAC	STREME-1	cds_PVP01_0115600.1	1035	1044	.	11.37	CAGCAUCAAC
1-CAASAGCAAC	STREME-1	cds_PVP01_0913800.1	14640	14649	.	11.37	CAGCAUCAAC
1-CAASAGCAAC	STREME-1	cds_PVP01_1466900.1	5293	5302	.	11.37	CAGCAUCAAC
1-CAASAGCAAC	STREME-1	cds_PVP01_1110800.1	4359	4368	.	11.37	CAGCAUCAAC
1-CAASAGCAAC	STREME-1	cds_PVP01_1310500.1	2768	2777	.	11.37	CAGCAUCAAC
1-CAASAGCAAC	STREME-1	cds_PVP01_1023900.1	2106	2115	.	11.37	CAGCAUCAAC
1-CAASAGCAAC	STREME-1	cds_PVP01_1119800.1	10975	10984	.	11.37	CAGCAUCAAC
1-CAASAGCAAC	STREME-1	cds_PVP01_0319700.1	1799	1808	.	11.37	CAGCAUCAAC
1-CAASAGCAAC	STREME-1	cds_PVP01_1022400.1	166	175	.	11.37	CAGCAUCAAC
1-CAASAGCAAC	STREME-1	cds_PVP01_0117600.1	5365	5374	.	11.35	CACGAGCUAC
1-CAASAGCAAC	STREME-1	cds_PVP01_1268200.1	1910	1919	.	11.35	CACGAGCUAC
1-CAASAGCAAC	STREME-1	cds_PVP01_0107500.1	42	51	.	11.35	CACGAGCUAC
1-CAASAGCAAC	STREME-1	cds_PVP01_0505800.1	12	21	.	11.35	CACGAGCUAC
1-CAASAGCAAC	STREME-1	cds_PVP01_1316100.1	3384	3393	.	11.35	CGAGAGUAAC
1-CAASAGCAAC	STREME-1	cds_PVP01_0529800.1	1740	1749	.	11.35	CGAGAGUAAC
1-CAASAGCAAC	STREME-1	cds_PVP01_1022500.1	32589	32598	.	11.35	CGAGAGUAAC
1-CAASAGCAAC	STREME-1	cds_PVP01_0829900.1	1787	1796	.	11.35	CGAGAGUAAC
1-CAASAGCAAC	STREME-1	cds_PVP01_1225400.1	4011	4020	.	11.35	CGAGAGUAAC
1-CAASAGCAAC	STREME-1	cds_PVP01_1424300.1	723	732	.	11.35	CGAGAGUAAC
1-CAASAGCAAC	STREME-1	cds_PVP01_1229200.1	2583	2592	.	11.35	CGAGAGUAAC
1-CAASAGCAAC	STREME-1	cds_PVP01_1209900.1	516	525	.	11.35	CGAGAGUAAC
1-CAASAGCAAC	STREME-1	cds_PVP01_1029200.1	2274	2283	.	11.35	CGAGAGUAAC
1-CAASAGCAAC	STREME-1	cds_PVP01_1024200.1	1155	1164	.	11.35	CGAGAGUAAC
1-CAASAGCAAC	STREME-1	cds_PVP01_1437300.1	1018	1027	.	11.35	CGAGAGUAAC
1-CAASAGCAAC	STREME-1	cds_PVP01_0935900.1	1406	1415	.	11.34	CAACUGCAUC
1-CAASAGCAAC	STREME-1	cds_PVP01_1031600.1	518	527	.	11.34	CAACUGCAUC
1-CAASAGCAAC	STREME-1	cds_PVP01_0621900.1	510	519	.	11.34	CAACUGCAUC
1-CAASAGCAAC	STREME-1	cds_PVP01_0836800.1	462	471	.	11.34	CAACUGCAUC
1-CAASAGCAAC	STREME-1	cds_PVP01_0921600.1	423	432	.	11.34	CAACUGCAUC
1-CAASAGCAAC	STREME-1	cds_PVP01_1211000.1	20637	20646	.	11.34	CAACUGCAUC
1-CAASAGCAAC	STREME-1	cds_PVP01_0603400.1	2047	2056	.	11.34	CAACUGCAUC
1-CAASAGCAAC	STREME-1	cds_PVP01_1132000.1	3709	3718	.	11.34	CAACUGCAUC
1-CAASAGCAAC	STREME-1	cds_PVP01_1325700.1	1484	1493	.	11.34	CAACUGCAUC
1-CAASAGCAAC	STREME-1	cds_PVP01_1467300.1	2253	2262	.	11.33	CACGAUCAUC
1-CAASAGCAAC	STREME-1	cds_PVP01_0606900.1	6205	6214	.	11.33	CACGAUCAUC
1-CAASAGCAAC	STREME-1	cds_PVP01_1138200.1	723	732	.	11.33	CACGAUCAUC
1-CAASAGCAAC	STREME-1	cds_PVP01_0913700.1	98	107	.	11.29	CACGAUCUAC
1-CAASAGCAAC	STREME-1	cds_PVP01_0731500.1	3164	3173	.	11.29	CACGAUCUAC
1-CAASAGCAAC	STREME-1	cds_PVP01_0943800.1	4191	4200	.	11.29	CACGAUCUAC
1-CAASAGCAAC	STREME-1	cds_PVP01_0735200.1	2155	2164	.	11.29	CACGAUCUAC
1-CAASAGCAAC	STREME-1	cds_PVP01_1456600.1	1236	1245	.	11.28	CAAGAGCAGC
1-CAASAGCAAC	STREME-1	cds_PVP01_0302900.1	1820	1829	.	11.28	CAAGAGCAGC
1-CAASAGCAAC	STREME-1	cds_PVP01_0719100.1	831	840	.	11.28	CAAGAGCAGC
1-CAASAGCAAC	STREME-1	cds_PVP01_1305400.1	2616	2625	.	11.28	CAAGAGCAGC
1-CAASAGCAAC	STREME-1	cds_PVP01_0935100.1	5811	5820	.	11.28	CAAGAGCAGC
1-CAASAGCAAC	STREME-1	cds_PVP01_1458300.1	6110	6119	.	11.28	CAAGAGCAGC
1-CAASAGCAAC	STREME-1	cds_PVP01_1424300.1	3297	3306	.	11.28	CAAGAGCAGC
1-CAASAGCAAC	STREME-1	cds_PVP01_0309100.1	153	162	.	11.28	CAAGAGCAGC
1-CAASAGCAAC	STREME-1	cds_PVP01_1442400.1	2073	2082	.	11.28	CAAGAGCAGC
1-CAASAGCAAC	STREME-1	cds_PVP01_1208400.1	478	487	.	11.28	CAAGAGCAGC
1-CAASAGCAAC	STREME-1	cds_PVP01_1018200.1	1029	1038	.	11.28	CAAGAGCAGC
1-CAASAGCAAC	STREME-1	cds_PVP01_1452000.1	2004	2013	.	11.28	CAAGAGCAGC
1-CAASAGCAAC	STREME-1	cds_PVP01_1466800.1	1242	1251	.	11.28	CAAGAGCAGC
1-CAASAGCAAC	STREME-1	cds_PVP01_1334400.1	5121	5130	.	11.28	CAAGAGCAGC
1-CAASAGCAAC	STREME-1	cds_PVP01_1447000.1	4509	4518	.	11.28	CAAGAGCAGC
1-CAASAGCAAC	STREME-1	cds_PVP01_0910900.1	1146	1155	.	11.28	CAAGAGCAGC
1-CAASAGCAAC	STREME-1	cds_PVP01_1445800.1	228	237	.	11.28	CAAGAGCAGC
1-CAASAGCAAC	STREME-1	cds_PVP01_1306100.1	3700	3709	.	11.28	CAAGAGCAGC
1-CAASAGCAAC	STREME-1	cds_PVP01_1451400.1	5075	5084	.	11.28	CAAGAGCAGC
1-CAASAGCAAC	STREME-1	cds_PVP01_1340300.1	16437	16446	.	11.28	CAAGAGCAGC
1-CAASAGCAAC	STREME-1	cds_PVP01_0946100.1	331	340	.	11.28	CAAGAGCAGC
1-CAASAGCAAC	STREME-1	cds_PVP01_0110400.1	8151	8160	.	11.25	CAAGUGCUAC
1-CAASAGCAAC	STREME-1	cds_PVP01_1310500.1	818	827	.	11.25	CAAGUGCUAC
1-CAASAGCAAC	STREME-1	cds_PVP01_0204500.1	1419	1428	.	11.25	CAAGUGCUAC
1-CAASAGCAAC	STREME-1	cds_PVP01_1455000.1	974	983	.	11.25	CAAGUGCUAC
1-CAASAGCAAC	STREME-1	cds_PVP01_0410800.1	2929	2938	.	11.25	CAAGUGCUAC
1-CAASAGCAAC	STREME-1	cds_PVP01_0604700.1	2299	2308	.	11.25	CAAGUGCUAC
1-CAASAGCAAC	STREME-1	cds_PVP01_1130500.1	3627	3636	.	11.25	CAAGUGCUAC
1-CAASAGCAAC	STREME-1	cds_PVP01_1002900.1	426	435	.	11.25	CAAGUGCUAC
1-CAASAGCAAC	STREME-1	cds_PVP01_0213800.1	780	789	.	11.24	CAAGAACAAC
1-CAASAGCAAC	STREME-1	cds_PVP01_0213800.1	993	1002	.	11.24	CAAGAACAAC
1-CAASAGCAAC	STREME-1	cds_PVP01_1219800.1	805	814	.	11.24	CAAGAACAAC
1-CAASAGCAAC	STREME-1	cds_PVP01_1235700.1	423	432	.	11.24	CAAGAACAAC
1-CAASAGCAAC	STREME-1	cds_PVP01_1422300.1	1470	1479	.	11.24	CAAGAACAAC
1-CAASAGCAAC	STREME-1	cds_PVP01_0505600.1	1929	1938	.	11.24	CAAGAACAAC
1-CAASAGCAAC	STREME-1	cds_PVP01_1011500.1	2388	2397	.	11.24	CAAGAACAAC
1-CAASAGCAAC	STREME-1	cds_PVP01_1310500.1	185	194	.	11.24	CAAGAACAAC
1-CAASAGCAAC	STREME-1	cds_PVP01_1211000.1	7149	7158	.	11.24	CAAGAACAAC
1-CAASAGCAAC	STREME-1	cds_PVP01_1023900.1	6882	6891	.	11.24	CAAGAACAAC
1-CAASAGCAAC	STREME-1	cds_PVP01_1121400.1	13182	13191	.	11.24	CAAGAACAAC
1-CAASAGCAAC	STREME-1	cds_PVP01_1251300.1	3633	3642	.	11.24	CAAGAACAAC
1-CAASAGCAAC	STREME-1	cds_PVP01_0709600.1	1455	1464	.	11.24	CAAGAACAAC
1-CAASAGCAAC	STREME-1	cds_PVP01_1448000.1	756	765	.	11.24	CAAGAACAAC
1-CAASAGCAAC	STREME-1	cds_PVP01_1033600.1	433	442	.	11.24	CAAGAACAAC
1-CAASAGCAAC	STREME-1	cds_PVP01_0822800.1	4728	4737	.	11.24	CAAGAACAAC
1-CAASAGCAAC	STREME-1	cds_PVP01_1139900.1	4398	4407	.	11.24	CAAGAACAAC
1-CAASAGCAAC	STREME-1	cds_PVP01_0725200.1	1032	1041	.	11.24	CAAGAACAAC
1-CAASAGCAAC	STREME-1	cds_PVP01_0004280.1	485	494	.	11.18	GAAGAUCAAC
1-CAASAGCAAC	STREME-1	cds_PVP01_0603100.1	853	862	.	11.18	GAAGAUCAAC
1-CAASAGCAAC	STREME-1	cds_PVP01_0804000.1	3490	3499	.	11.18	GAAGAUCAAC
1-CAASAGCAAC	STREME-1	cds_PVP01_1210500.1	4830	4839	.	11.18	GAAGAUCAAC
1-CAASAGCAAC	STREME-1	cds_PVP01_0217100.1	545	554	.	11.18	GAAGAUCAAC
1-CAASAGCAAC	STREME-1	cds_PVP01_0410100.1	1469	1478	.	11.18	GAAGAUCAAC
1-CAASAGCAAC	STREME-1	cds_PVP01_1142200.1	1136	1145	.	11.18	GAAGAUCAAC
1-CAASAGCAAC	STREME-1	cds_PVP01_0320400.1	3934	3943	.	11.18	GAAGAUCAAC
1-CAASAGCAAC	STREME-1	cds_PVP01_1323600.1	1163	1172	.	11.18	GAAGAUCAAC
1-CAASAGCAAC	STREME-1	cds_PVP01_1235400.1	1443	1452	.	11.18	GAAGAUCAAC
1-CAASAGCAAC	STREME-1	cds_PVP01_0212200.1	4812	4821	.	11.18	GAAGAUCAAC
1-CAASAGCAAC	STREME-1	cds_PVP01_0920000.1	27	36	.	11.18	GAAGAUCAAC
1-CAASAGCAAC	STREME-1	cds_PVP01_1445400.1	5268	5277	.	11.17	CAACAUUAAC
1-CAASAGCAAC	STREME-1	cds_PVP01_0913800.1	3747	3756	.	11.17	CAACAUUAAC
1-CAASAGCAAC	STREME-1	cds_PVP01_0913800.1	12687	12696	.	11.17	CAACAUUAAC
1-CAASAGCAAC	STREME-1	cds_PVP01_1322500.1	4898	4907	.	11.17	CAACAUUAAC
1-CAASAGCAAC	STREME-1	cds_PVP01_0727900.1	1566	1575	.	11.17	CAACAUUAAC
1-CAASAGCAAC	STREME-1	cds_PVP01_0503400.1	53	62	.	11.17	CAACAUUAAC
1-CAASAGCAAC	STREME-1	cds_PVP01_1404700.1	21585	21594	.	11.17	CAACAUUAAC
1-CAASAGCAAC	STREME-1	cds_PVP01_1306100.1	4959	4968	.	11.17	CAACAUUAAC
1-CAASAGCAAC	STREME-1	cds_PVP01_1451400.1	4916	4925	.	11.17	CAACAUUAAC
1-CAASAGCAAC	STREME-1	cds_PVP01_0106700.1	4029	4038	.	11.15	CGGCAGCAAC
1-CAASAGCAAC	STREME-1	cds_PVP01_0106700.1	4791	4800	.	11.15	CGGCAGCAAC
1-CAASAGCAAC	STREME-1	cds_PVP01_1107800.1	4749	4758	.	11.15	CGGCAGCAAC
1-CAASAGCAAC	STREME-1	cds_PVP01_1260500.1	4152	4161	.	11.15	CGGCAGCAAC
1-CAASAGCAAC	STREME-1	cds_PVP01_1225400.1	3416	3425	.	11.15	CGGCAGCAAC
1-CAASAGCAAC	STREME-1	cds_PVP01_1225400.1	3425	3434	.	11.15	CGGCAGCAAC
1-CAASAGCAAC	STREME-1	cds_PVP01_1225400.1	3443	3452	.	11.15	CGGCAGCAAC
1-CAASAGCAAC	STREME-1	cds_PVP01_1226100.1	303	312	.	11.15	CGGCAGCAAC
1-CAASAGCAAC	STREME-1	cds_PVP01_1112300.1	3720	3729	.	11.15	CGGCAGCAAC
1-CAASAGCAAC	STREME-1	cds_PVP01_0621900.1	1656	1665	.	11.15	CGGCAGCAAC
1-CAASAGCAAC	STREME-1	cds_PVP01_1210500.1	3240	3249	.	11.15	CGGCAGCAAC
1-CAASAGCAAC	STREME-1	cds_PVP01_1146300.1	1951	1960	.	11.15	CGGCAGCAAC
1-CAASAGCAAC	STREME-1	cds_PVP01_1011500.1	23618	23627	.	11.15	CGGCAGCAAC
1-CAASAGCAAC	STREME-1	cds_PVP01_0942800.1	253	262	.	11.15	CGGCAGCAAC
1-CAASAGCAAC	STREME-1	cds_PVP01_0942800.1	7206	7215	.	11.15	CGGCAGCAAC
1-CAASAGCAAC	STREME-1	cds_PVP01_0709600.1	1857	1866	.	11.15	CGGCAGCAAC
1-CAASAGCAAC	STREME-1	cds_PVP01_0822800.1	5241	5250	.	11.15	CGGCAGCAAC
1-CAASAGCAAC	STREME-1	cds_PVP01_0714400.1	1889	1898	.	11.15	CGGCAGCAAC
1-CAASAGCAAC	STREME-1	cds_PVP01_1144400.1	3540	3549	.	11.15	CGGCAGCAAC
1-CAASAGCAAC	STREME-1	cds_PVP01_0408300.1	1456	1465	.	11.15	CGGCAGCAAC
1-CAASAGCAAC	STREME-1	cds_PVP01_0408300.1	1498	1507	.	11.15	CGGCAGCAAC
1-CAASAGCAAC	STREME-1	cds_PVP01_0213800.1	3771	3780	.	11.15	CGAGAGCCAC
1-CAASAGCAAC	STREME-1	cds_PVP01_0813300.1	2766	2775	.	11.15	CGAGAGCCAC
1-CAASAGCAAC	STREME-1	cds_PVP01_0112000.1	27	36	.	11.15	CGAGAGCCAC
1-CAASAGCAAC	STREME-1	cds_PVP01_1011500.1	9842	9851	.	11.15	CGAGAGCCAC
1-CAASAGCAAC	STREME-1	cds_PVP01_0320400.1	1083	1092	.	11.15	CGAGAGCCAC
1-CAASAGCAAC	STREME-1	cds_PVP01_1024200.1	197	206	.	11.15	CGAGAGCCAC
1-CAASAGCAAC	STREME-1	cds_PVP01_0302900.1	146	155	.	11.07	CAACAUCAGC
1-CAASAGCAAC	STREME-1	cds_PVP01_0527700.1	1263	1272	.	11.07	CAACAUCAGC
1-CAASAGCAAC	STREME-1	cds_PVP01_0931500.1	2034	2043	.	11.07	CAACAUCAGC
1-CAASAGCAAC	STREME-1	cds_PVP01_0931500.1	3048	3057	.	11.07	CAACAUCAGC
1-CAASAGCAAC	STREME-1	cds_PVP01_1031600.1	1229	1238	.	11.07	CAACAUCAGC
1-CAASAGCAAC	STREME-1	cds_PVP01_0311300.1	118	127	.	11.07	CAACAUCAGC
1-CAASAGCAAC	STREME-1	cds_PVP01_1022500.1	32163	32172	.	11.07	CAACAUCAGC
1-CAASAGCAAC	STREME-1	cds_PVP01_0104500.1	3216	3225	.	11.07	CAACAUCAGC
1-CAASAGCAAC	STREME-1	cds_PVP01_0945900.1	3297	3306	.	11.07	CAACAUCAGC
1-CAASAGCAAC	STREME-1	cds_PVP01_1119800.1	8206	8215	.	11.07	CAACAUCAGC
1-CAASAGCAAC	STREME-1	cds_PVP01_0823900.1	1443	1452	.	11.07	CAACAUCAGC
1-CAASAGCAAC	STREME-1	cds_PVP01_0703800.1	1438	1447	.	11.07	CAACAUCAGC
1-CAASAGCAAC	STREME-1	cds_PVP01_0410800.1	18	27	.	11.07	CAACAUCAGC
1-CAASAGCAAC	STREME-1	cds_PVP01_0939800.1	1822	1831	.	11.07	CAACAUCAGC
1-CAASAGCAAC	STREME-1	cds_PVP01_0942800.1	1815	1824	.	11.07	CAACAUCAGC
1-CAASAGCAAC	STREME-1	cds_PVP01_1423300.1	1092	1101	.	11.07	CAACAUCAGC
1-CAASAGCAAC	STREME-1	cds_PVP01_0908600.1	5541	5550	.	11.07	CAACAUCAGC
1-CAASAGCAAC	STREME-1	cds_PVP01_1135200.1	3216	3225	.	11.07	CAACAUCAGC
1-CAASAGCAAC	STREME-1	cds_PVP01_1135200.1	5754	5763	.	11.07	CAACAUCAGC
1-CAASAGCAAC	STREME-1	cds_PVP01_1024200.1	2922	2931	.	11.07	CAACAUCAGC
1-CAASAGCAAC	STREME-1	cds_PVP01_1024200.1	3876	3885	.	11.07	CAACAUCAGC
1-CAASAGCAAC	STREME-1	cds_PVP01_0316400.1	6243	6252	.	11.07	CAACAUCAGC
1-CAASAGCAAC	STREME-1	cds_PVP01_1319600.1	3934	3943	.	11.07	CAACAUCAGC
1-CAASAGCAAC	STREME-1	cds_PVP01_0529800.1	705	714	.	11.07	CAAUAGCAGC
1-CAASAGCAAC	STREME-1	cds_PVP01_0511000.1	2358	2367	.	11.07	CAAUAGCAGC
1-CAASAGCAAC	STREME-1	cds_PVP01_0105700.1	5227	5236	.	11.07	CAAUAGCAGC
1-CAASAGCAAC	STREME-1	cds_PVP01_0104300.1	5181	5190	.	11.07	CAAUAGCAGC
1-CAASAGCAAC	STREME-1	cds_PVP01_1240500.1	1647	1656	.	11.07	CAAUAGCAGC
1-CAASAGCAAC	STREME-1	cds_PVP01_1260500.1	1206	1215	.	11.07	CAAUAGCAGC
1-CAASAGCAAC	STREME-1	cds_PVP01_1260500.1	1563	1572	.	11.07	CAAUAGCAGC
1-CAASAGCAAC	STREME-1	cds_PVP01_0945900.1	5052	5061	.	11.07	CAAUAGCAGC
1-CAASAGCAAC	STREME-1	cds_PVP01_1438700.1	2430	2439	.	11.07	CAAUAGCAGC
1-CAASAGCAAC	STREME-1	cds_PVP01_1256500.1	2838	2847	.	11.07	CAAUAGCAGC
1-CAASAGCAAC	STREME-1	cds_PVP01_0814700.1	3720	3729	.	11.07	CAAUAGCAGC
1-CAASAGCAAC	STREME-1	cds_PVP01_1011500.1	4617	4626	.	11.07	CAAUAGCAGC
1-CAASAGCAAC	STREME-1	cds_PVP01_0803200.1	939	948	.	11.07	CAAUAGCAGC
1-CAASAGCAAC	STREME-1	cds_PVP01_1211100.1	186	195	.	11.07	CAAUAGCAGC
1-CAASAGCAAC	STREME-1	cds_PVP01_1329900.1	1101	1110	.	11.07	CAAUAGCAGC
1-CAASAGCAAC	STREME-1	cds_PVP01_0729100.1	3604	3613	.	11.07	CAAUAGCAGC
1-CAASAGCAAC	STREME-1	cds_PVP01_1310500.1	2765	2774	.	11.05	CACCAGCAUC
1-CAASAGCAAC	STREME-1	cds_PVP01_1204200.1	17	26	.	11.05	CACCAGCAUC
1-CAASAGCAAC	STREME-1	cds_PVP01_1226200.1	1971	1980	.	11.05	CACCAGCAUC
1-CAASAGCAAC	STREME-1	cds_PVP01_0604700.1	1738	1747	.	11.05	CACCAGCAUC
1-CAASAGCAAC	STREME-1	cds_PVP01_0210500.1	1494	1503	.	11.05	CACCAGCAUC
1-CAASAGCAAC	STREME-1	cds_PVP01_1139900.1	12897	12906	.	11.05	CACCAGCAUC
1-CAASAGCAAC	STREME-1	cds_PVP01_0806900.1	1394	1403	.	11.04	CAAGACCGAC
1-CAASAGCAAC	STREME-1	cds_PVP01_0213600.1	3143	3152	.	11.03	CUAUAGCUAC
1-CAASAGCAAC	STREME-1	cds_PVP01_0817100.1	3114	3123	.	11.03	CUAUAGCUAC
1-CAASAGCAAC	STREME-1	cds_PVP01_0214800.1	4674	4683	.	11.03	CACUAGCGAC
1-CAASAGCAAC	STREME-1	cds_PVP01_1401400.1	2698	2707	.	11.03	CGAUAUCGAC
1-CAASAGCAAC	STREME-1	cds_PVP01_0409600.1	2286	2295	.	11.03	CAGUAUCAAC
1-CAASAGCAAC	STREME-1	cds_PVP01_0709000.1	459	468	.	11.02	CAACAGCUUC
1-CAASAGCAAC	STREME-1	cds_PVP01_1469200.1	3894	3903	.	11.02	CAACAGCUUC
1-CAASAGCAAC	STREME-1	cds_PVP01_0105700.1	8062	8071	.	11.02	CAACAGCUUC
1-CAASAGCAAC	STREME-1	cds_PVP01_0104800.1	2387	2396	.	11.02	CAACAGCUUC
1-CAASAGCAAC	STREME-1	cds_PVP01_1011500.1	19064	19073	.	11.02	CAACAGCUUC
1-CAASAGCAAC	STREME-1	cds_PVP01_0606900.1	10993	11002	.	11.02	CAACAGCUUC
1-CAASAGCAAC	STREME-1	cds_PVP01_1321100.1	1122	1131	.	11.02	CAACAGCUUC
1-CAASAGCAAC	STREME-1	cds_PVP01_1334400.1	5529	5538	.	11.02	CAACAGCUUC
1-CAASAGCAAC	STREME-1	cds_PVP01_1445500.1	1968	1977	.	11.02	CAACAGCUUC
1-CAASAGCAAC	STREME-1	cds_PVP01_1030000.1	16	25	.	11.02	CAACAGCUUC
1-CAASAGCAAC	STREME-1	cds_PVP01_0803400.1	24	33	.	11.02	CAACAGCUUC
1-CAASAGCAAC	STREME-1	cds_PVP01_1141300.1	1149	1158	.	11.02	CAACAGCUUC
1-CAASAGCAAC	STREME-1	cds_PVP01_1452400.1	766	775	.	11.02	CAACAGCUUC
1-CAASAGCAAC	STREME-1	cds_PVP01_0908600.1	5646	5655	.	11.02	CAACAGCUUC
1-CAASAGCAAC	STREME-1	cds_PVP01_1340300.1	19635	19644	.	11.02	CAACAGCUUC
1-CAASAGCAAC	STREME-1	cds_PVP01_1313500.1	1635	1644	.	11.02	CAACAGCUUC
1-CAASAGCAAC	STREME-1	cds_PVP01_1135200.1	2649	2658	.	11.02	CAACAGCUUC
1-CAASAGCAAC	STREME-1	cds_PVP01_1130500.1	2160	2169	.	11.02	CAACAGCUUC
1-CAASAGCAAC	STREME-1	cds_PVP01_0920000.1	4872	4881	.	11.02	CAACAGCUUC
1-CAASAGCAAC	STREME-1	cds_PVP01_0316400.1	5568	5577	.	11.02	CAACAGCUUC
1-CAASAGCAAC	STREME-1	cds_PVP01_0213800.1	5922	5931	.	11.02	GAACAGCAAC
1-CAASAGCAAC	STREME-1	cds_PVP01_1135300.1	10686	10695	.	11.02	GAACAGCAAC
1-CAASAGCAAC	STREME-1	cds_PVP01_1453600.1	615	624	.	11.02	GAACAGCAAC
1-CAASAGCAAC	STREME-1	cds_PVP01_1457300.1	3969	3978	.	11.02	GAACAGCAAC
1-CAASAGCAAC	STREME-1	cds_PVP01_0620800.1	1126	1135	.	11.02	GAACAGCAAC
1-CAASAGCAAC	STREME-1	cds_PVP01_0732200.1	624	633	.	11.02	GAACAGCAAC
1-CAASAGCAAC	STREME-1	cds_PVP01_0307000.1	4254	4263	.	11.02	GAACAGCAAC
1-CAASAGCAAC	STREME-1	cds_PVP01_0607100.1	486	495	.	11.02	GAACAGCAAC
1-CAASAGCAAC	STREME-1	cds_PVP01_1238700.1	543	552	.	11.02	GAACAGCAAC
1-CAASAGCAAC	STREME-1	cds_PVP01_0104800.1	822	831	.	11.02	GAACAGCAAC
1-CAASAGCAAC	STREME-1	cds_PVP01_0104800.1	3162	3171	.	11.02	GAACAGCAAC
1-CAASAGCAAC	STREME-1	cds_PVP01_1011500.1	15767	15776	.	11.02	GAACAGCAAC
1-CAASAGCAAC	STREME-1	cds_PVP01_1268600.1	1012	1021	.	11.02	GAACAGCAAC
1-CAASAGCAAC	STREME-1	cds_PVP01_1215100.1	342	351	.	11.02	GAACAGCAAC
1-CAASAGCAAC	STREME-1	cds_PVP01_0908600.1	4038	4047	.	11.02	GAACAGCAAC
1-CAASAGCAAC	STREME-1	cds_PVP01_1306100.1	4542	4551	.	11.02	GAACAGCAAC
1-CAASAGCAAC	STREME-1	cds_PVP01_1010400.1	288	297	.	11.02	GAACAGCAAC
1-CAASAGCAAC	STREME-1	cds_PVP01_1134800.1	1560	1569	.	11.02	GAACAGCAAC
1-CAASAGCAAC	STREME-1	cds_PVP01_1139900.1	12538	12547	.	11.02	GAACAGCAAC
1-CAASAGCAAC	STREME-1	cds_PVP01_0813600.1	360	369	.	11.02	GAACAGCAAC
1-CAASAGCAAC	STREME-1	cds_PVP01_1144400.1	6370	6379	.	11.02	GAACAGCAAC
1-CAASAGCAAC	STREME-1	cds_PVP01_0212200.1	1605	1614	.	11.02	GAACAGCAAC
1-CAASAGCAAC	STREME-1	cds_PVP01_0212200.1	2403	2412	.	11.02	GAACAGCAAC
1-CAASAGCAAC	STREME-1	cds_PVP01_1014400.1	1281	1290	.	11.02	GAACAGCAAC
1-CAASAGCAAC	STREME-1	cds_PVP01_0319500.1	4101	4110	.	11.02	CUACAGCAUC
1-CAASAGCAAC	STREME-1	cds_PVP01_1115300.1	333	342	.	11.02	CUACAGCAUC
1-CAASAGCAAC	STREME-1	cds_PVP01_0315600.1	5523	5532	.	11.02	CUACAGCAUC
1-CAASAGCAAC	STREME-1	cds_PVP01_0821200.1	2031	2040	.	11.02	CUACAGCAUC
1-CAASAGCAAC	STREME-1	cds_PVP01_0929600.1	1137	1146	.	11.02	CUACAGCAUC
1-CAASAGCAAC	STREME-1	cds_PVP01_0604800.1	1221	1230	.	11.02	CUACAGCAUC
1-CAASAGCAAC	STREME-1	cds_PVP01_1123500.1	3405	3414	.	11.02	CUACAGCAUC
1-CAASAGCAAC	STREME-1	cds_PVP01_0517600.1	2586	2595	.	11	CACGAGCAUC
1-CAASAGCAAC	STREME-1	cds_PVP01_0114000.1	108	117	.	11	CACGAGCAUC
1-CAASAGCAAC	STREME-1	cds_PVP01_0918500.1	486	495	.	11	CACGAGCAUC
1-CAASAGCAAC	STREME-1	cds_PVP01_1325700.1	226	235	.	11	CACGAGCAUC
1-CAASAGCAAC	STREME-1	cds_PVP01_1141400.1	1809	1818	.	10.99	CAAGACCAUC
1-CAASAGCAAC	STREME-1	cds_PVP01_0513700.1	711	720	.	10.99	CAAGACCAUC
1-CAASAGCAAC	STREME-1	cds_PVP01_0936900.1	6461	6470	.	10.99	CAAGACCAUC
1-CAASAGCAAC	STREME-1	cds_PVP01_0705900.1	2388	2397	.	10.99	CAAGACCAUC
1-CAASAGCAAC	STREME-1	cds_PVP01_0616500.1	1209	1218	.	10.99	CAAGACCAUC
1-CAASAGCAAC	STREME-1	cds_PVP01_1243300.1	366	375	.	10.95	CUACUGCAAC
1-CAASAGCAAC	STREME-1	cds_PVP01_0417300.1	1686	1695	.	10.95	CUACUGCAAC
1-CAASAGCAAC	STREME-1	cds_PVP01_0529300.1	1290	1299	.	10.95	CUACUGCAAC
1-CAASAGCAAC	STREME-1	cds_PVP01_0529300.1	2457	2466	.	10.95	CUACUGCAAC
1-CAASAGCAAC	STREME-1	cds_PVP01_0604300.1	3747	3756	.	10.95	CUACUGCAAC
1-CAASAGCAAC	STREME-1	cds_PVP01_0928700.1	5685	5694	.	10.95	CUACUGCAAC
1-CAASAGCAAC	STREME-1	cds_PVP01_0829300.1	870	879	.	10.95	CUACUGCAAC
1-CAASAGCAAC	STREME-1	cds_PVP01_1033900.1	2047	2056	.	10.95	CUACUGCAAC
1-CAASAGCAAC	STREME-1	cds_PVP01_1033900.1	2068	2077	.	10.95	CUACUGCAAC
1-CAASAGCAAC	STREME-1	cds_PVP01_0505400.1	2278	2287	.	10.95	CUACUGCAAC
1-CAASAGCAAC	STREME-1	cds_PVP01_1008000.1	888	897	.	10.95	CUACUGCAAC
1-CAASAGCAAC	STREME-1	cds_PVP01_0923700.1	4203	4212	.	10.95	CUACUGCAAC
1-CAASAGCAAC	STREME-1	cds_PVP01_0304700.1	5559	5568	.	10.95	CUACUGCAAC
1-CAASAGCAAC	STREME-1	cds_PVP01_1346000.1	4196	4205	.	10.95	CUACUGCAAC
1-CAASAGCAAC	STREME-1	cds_PVP01_1004800.1	1110	1119	.	10.95	CUACUGCAAC
1-CAASAGCAAC	STREME-1	cds_PVP01_1262500.1	4127	4136	.	10.95	CUACUGCAAC
1-CAASAGCAAC	STREME-1	cds_PVP01_0006260.1	245	254	.	10.94	CUAGAGUAAC
1-CAASAGCAAC	STREME-1	cds_PVP01_0616600.1	1279	1288	.	10.94	CACGAUCGAC
1-CAASAGCAAC	STREME-1	cds_PVP01_0928700.1	3429	3438	.	10.94	CACGAUCGAC
1-CAASAGCAAC	STREME-1	cds_PVP01_0309100.1	168	177	.	10.94	CACGAUCGAC
1-CAASAGCAAC	STREME-1	cds_PVP01_0714800.1	4989	4998	.	10.94	CACGAUCGAC
1-CAASAGCAAC	STREME-1	cds_PVP01_0516500.1	1143	1152	.	10.94	CACGAUCGAC
1-CAASAGCAAC	STREME-1	cds_PVP01_0509300.1	3160	3169	.	10.94	CACGAUCGAC
#
2-AAGAAGGAGAAC	STREME-2	cds_PVP01_0213800.1	13357	13368	.	18.77	AAGAAGGAGAAC
2-AAGAAGGAGAAC	STREME-2	cds_PVP01_0703700.1	14836	14847	.	18.77	AAGAAGGAGAAC
2-AAGAAGGAGAAC	STREME-2	cds_PVP01_1144400.1	6003	6014	.	18.77	AAGAAGGAGAAC
2-AAGAAGGAGAAC	STREME-2	cds_PVP01_0832500.1	1295	1306	.	17.08	AAGAAGUAGAAC
2-AAGAAGGAGAAC	STREME-2	cds_PVP01_1022500.1	6160	6171	.	17.03	AAGAAGGAGAUC
2-AAGAAGGAGAAC	STREME-2	cds_PVP01_0410100.1	1701	1712	.	17.03	AAGAAGGAGAUC
2-AAGAAGGAGAAC	STREME-2	cds_PVP01_1404700.1	20157	20168	.	16.87	AAGAAGCAGAAC
2-AAGAAGGAGAAC	STREME-2	cds_PVP01_1343200.1	619	630	.	16.87	AAGAAGCAGAAC
2-AAGAAGGAGAAC	STREME-2	cds_PVP01_0832100.1	2296	2307	.	16.87	AAGAAGCAGAAC
2-AAGAAGGAGAAC	STREME-2	cds_PVP01_1316100.1	13924	13935	.	16.85	AAGAAGGAGGAC
2-AAGAAGGAGAAC	STREME-2	cds_PVP01_0519500.1	697	708	.	16.85	AAGAAGGAGGAC
2-AAGAAGGAGAAC	STREME-2	cds_PVP01_1119800.1	4145	4156	.	16.78	AAGAAGGACAAC
2-AAGAAGGAGAAC	STREME-2	cds_PVP01_1340300.1	3442	3453	.	16.78	AAGAAGGACAAC
2-AAGAAGGAGAAC	STREME-2	cds_PVP01_0604300.1	82	93	.	16.38	AAGAAGGCGAAC
2-AAGAAGGAGAAC	STREME-2	cds_PVP01_0623500.1	2072	2083	.	16.38	AAGAAGGCGAAC
2-AAGAAGGAGAAC	STREME-2	cds_PVP01_1438600.1	5841	5852	.	16.38	AAGAAGGCGAAC
2-AAGAAGGAGAAC	STREME-2	cds_PVP01_0813600.1	3943	3954	.	16.38	AAGAAGGCGAAC
2-AAGAAGGAGAAC	STREME-2	cds_PVP01_0945900.1	1792	1803	.	16.33	AAGAAGGAUAAC
2-AAGAAGGAGAAC	STREME-2	cds_PVP01_0623500.1	3712	3723	.	16.33	AAGAAGGAUAAC
2-AAGAAGGAGAAC	STREME-2	cds_PVP01_1438600.1	6447	6458	.	16.33	AAGAAGGAUAAC
2-AAGAAGGAGAAC	STREME-2	cds_PVP01_0920600.1	799	810	.	16.31	AAGAAGGAGACC
2-AAGAAGGAGAAC	STREME-2	cds_PVP01_0419100.1	944	955	.	16.23	AAGAAGGUGAAC
2-AAGAAGGAGAAC	STREME-2	cds_PVP01_1445400.1	952	963	.	16.23	AAGAAGGUGAAC
2-AAGAAGGAGAAC	STREME-2	cds_PVP01_0807800.1	4852	4863	.	16.23	AAGAAGGUGAAC
2-AAGAAGGAGAAC	STREME-2	cds_PVP01_0529800.1	9841	9852	.	16.14	AAGAAGAAGAAC
2-AAGAAGGAGAAC	STREME-2	cds_PVP01_0110400.1	4099	4110	.	16.14	AAGAAGAAGAAC
2-AAGAAGGAGAAC	STREME-2	cds_PVP01_0523900.1	877	888	.	16.14	AAGAAGAAGAAC
2-AAGAAGGAGAAC	STREME-2	cds_PVP01_1022500.1	2488	2499	.	16.14	AAGAAGAAGAAC
2-AAGAAGGAGAAC	STREME-2	cds_PVP01_1022500.1	2689	2700	.	16.14	AAGAAGAAGAAC
2-AAGAAGGAGAAC	STREME-2	cds_PVP01_1103800.1	4	15	.	16.14	AAGAAGAAGAAC
2-AAGAAGGAGAAC	STREME-2	cds_PVP01_1033900.1	1760	1771	.	16.14	AAGAAGAAGAAC
2-AAGAAGGAGAAC	STREME-2	cds_PVP01_0408400.1	1360	1371	.	16.14	AAGAAGAAGAAC
2-AAGAAGGAGAAC	STREME-2	cds_PVP01_0703700.1	703	714	.	16.14	AAGAAGAAGAAC
2-AAGAAGGAGAAC	STREME-2	cds_PVP01_1238900.1	1835	1846	.	16.14	AAGAAGAAGAAC
2-AAGAAGGAGAAC	STREME-2	cds_PVP01_1238900.1	2432	2443	.	16.14	AAGAAGAAGAAC
2-AAGAAGGAGAAC	STREME-2	cds_PVP01_1447400.1	1789	1800	.	16.14	AAGAAGAAGAAC
2-AAGAAGGAGAAC	STREME-2	cds_PVP01_0410100.1	2955	2966	.	16.14	AAGAAGAAGAAC
2-AAGAAGGAGAAC	STREME-2	cds_PVP01_1441600.1	1606	1617	.	16.14	AAGAAGAAGAAC
2-AAGAAGGAGAAC	STREME-2	cds_PVP01_0942500.1	253	264	.	16.14	AAGAAGAAGAAC
2-AAGAAGGAGAAC	STREME-2	cds_PVP01_1313200.1	1486	1497	.	16.14	AAGAAGAAGAAC
2-AAGAAGGAGAAC	STREME-2	cds_PVP01_1002900.1	3664	3675	.	16.14	AAGAAGAAGAAC
2-AAGAAGGAGAAC	STREME-2	cds_PVP01_0114800.1	1783	1794	.	16.14	AAGAAGAAGAAC
2-AAGAAGGAGAAC	STREME-2	cds_PVP01_0529800.1	1531	1542	.	15.93	AAGAAGGAGAAG
2-AAGAAGGAGAAC	STREME-2	cds_PVP01_0529800.1	4318	4329	.	15.93	AAGAAGGAGAAG
2-AAGAAGGAGAAC	STREME-2	cds_PVP01_0813300.1	372	383	.	15.93	AAGAAGGAGAAG
2-AAGAAGGAGAAC	STREME-2	cds_PVP01_0527700.1	535	546	.	15.93	AAGAAGGAGAAG
2-AAGAAGGAGAAC	STREME-2	cds_PVP01_0529300.1	9415	9426	.	15.93	AAGAAGGAGAAG
2-AAGAAGGAGAAC	STREME-2	cds_PVP01_0829900.1	2751	2762	.	15.93	AAGAAGGAGAAG
2-AAGAAGGAGAAC	STREME-2	cds_PVP01_1421500.1	3118	3129	.	15.93	AAGAAGGAGAAG
2-AAGAAGGAGAAC	STREME-2	cds_PVP01_0117600.1	3097	3108	.	15.93	AAGAAGGAGAAG
2-AAGAAGGAGAAC	STREME-2	cds_PVP01_0913800.1	9880	9891	.	15.93	AAGAAGGAGAAG
2-AAGAAGGAGAAC	STREME-2	cds_PVP01_0610200.1	579	590	.	15.93	AAGAAGGAGAAG
2-AAGAAGGAGAAC	STREME-2	cds_PVP01_0520500.1	1222	1233	.	15.93	AAGAAGGAGAAG
2-AAGAAGGAGAAC	STREME-2	cds_PVP01_1115100.1	7849	7860	.	15.93	AAGAAGGAGAAG
2-AAGAAGGAGAAC	STREME-2	cds_PVP01_1441400.1	196	207	.	15.93	AAGAAGGAGAAG
2-AAGAAGGAGAAC	STREME-2	cds_PVP01_1404700.1	11068	11079	.	15.93	AAGAAGGAGAAG
2-AAGAAGGAGAAC	STREME-2	cds_PVP01_0606900.1	5303	5314	.	15.93	AAGAAGGAGAAG
2-AAGAAGGAGAAC	STREME-2	cds_PVP01_1112200.1	3574	3585	.	15.93	AAGAAGGAGAAG
2-AAGAAGGAGAAC	STREME-2	cds_PVP01_0921700.1	1688	1699	.	15.93	AAGAAGGAGAAG
2-AAGAAGGAGAAC	STREME-2	cds_PVP01_1227800.1	3484	3495	.	15.93	AAGAAGGAGAAG
2-AAGAAGGAGAAC	STREME-2	cds_PVP01_1027200.1	1753	1764	.	15.93	AAGAAGGAGAAG
2-AAGAAGGAGAAC	STREME-2	cds_PVP01_1441600.1	3268	3279	.	15.93	AAGAAGGAGAAG
2-AAGAAGGAGAAC	STREME-2	cds_PVP01_0417700.1	227	238	.	15.93	AAGAAGGAGAAG
2-AAGAAGGAGAAC	STREME-2	cds_PVP01_0822800.1	2953	2964	.	15.93	AAGAAGGAGAAG
2-AAGAAGGAGAAC	STREME-2	cds_PVP01_0415700.1	578	589	.	15.93	AAGAAGGAGAAG
2-AAGAAGGAGAAC	STREME-2	cds_PVP01_0405000.1	7073	7084	.	15.93	AAGAAGGAGAAG
2-AAGAAGGAGAAC	STREME-2	cds_PVP01_0516600.1	2503	2514	.	15.93	AAGAAGGAGAAG
2-AAGAAGGAGAAC	STREME-2	cds_PVP01_0701200.1	2007	2018	.	15.93	AAGAAGGAGAAG
2-AAGAAGGAGAAC	STREME-2	cds_PVP01_0920000.1	1643	1654	.	15.93	AAGAAGGAGAAG
2-AAGAAGGAGAAC	STREME-2	cds_PVP01_0316400.1	5941	5952	.	15.93	AAGAAGGAGAAG
2-AAGAAGGAGAAC	STREME-2	cds_PVP01_0316400.1	5989	6000	.	15.93	AAGAAGGAGAAG
2-AAGAAGGAGAAC	STREME-2	cds_PVP01_0723100.1	4996	5007	.	15.86	AAGAAGGAGUAC
2-AAGAAGGAGAAC	STREME-2	cds_PVP01_0409900.1	1963	1974	.	15.86	AAGAAGGAGUAC
2-AAGAAGGAGAAC	STREME-2	cds_PVP01_0807700.1	3706	3717	.	15.86	AAGAAGGAGUAC
2-AAGAAGGAGAAC	STREME-2	cds_PVP01_0724600.1	8488	8499	.	15.86	AAGAAGGAGUAC
2-AAGAAGGAGAAC	STREME-2	cds_PVP01_1101400.1	1343	1354	.	15.84	CAGAAGGAGAAC
2-AAGAAGGAGAAC	STREME-2	cds_PVP01_0305300.1	1419	1430	.	15.84	CAGAAGGAGAAC
2-AAGAAGGAGAAC	STREME-2	cds_PVP01_1315700.1	1876	1887	.	15.84	CAGAAGGAGAAC
2-AAGAAGGAGAAC	STREME-2	cds_PVP01_1027300.1	396	407	.	15.79	AAGAAGGAGAGC
2-AAGAAGGAGAAC	STREME-2	cds_PVP01_0106700.1	382	393	.	15.79	AAGAAGGAGAGC
2-AAGAAGGAGAAC	STREME-2	cds_PVP01_0928700.1	2439	2450	.	15.79	AAGAAGGAGAGC
2-AAGAAGGAGAAC	STREME-2	cds_PVP01_1328700.1	1066	1077	.	15.79	AAGAAGGAGAGC
2-AAGAAGGAGAAC	STREME-2	cds_PVP01_0703700.1	5926	5937	.	15.79	AAGAAGGAGAGC
2-AAGAAGGAGAAC	STREME-2	cds_PVP01_1110800.1	4189	4200	.	15.79	AAGAAGGAGAGC
2-AAGAAGGAGAAC	STREME-2	cds_PVP01_1447000.1	3364	3375	.	15.79	AAGAAGGAGAGC
2-AAGAAGGAGAAC	STREME-2	cds_PVP01_1132000.1	3380	3391	.	15.79	AAGAAGGAGAGC
2-AAGAAGGAGAAC	STREME-2	cds_PVP01_1442500.1	1204	1215	.	15.79	AAGAAGGAGAGC
2-AAGAAGGAGAAC	STREME-2	cds_PVP01_0832100.1	2248	2259	.	15.79	AAGAAGGAGAGC
2-AAGAAGGAGAAC	STREME-2	cds_PVP01_1414500.1	2974	2985	.	15.79	AAGAAGGAGAGC
2-AAGAAGGAGAAC	STREME-2	cds_PVP01_0935900.1	2295	2306	.	15.53	AAUAAGGAGAAC
2-AAGAAGGAGAAC	STREME-2	cds_PVP01_0829800.1	1441	1452	.	15.53	AAUAAGGAGAAC
2-AAGAAGGAGAAC	STREME-2	cds_PVP01_0839000.1	230	241	.	15.34	AAGAAGUAGAUC
2-AAGAAGGAGAAC	STREME-2	cds_PVP01_0212100.1	6669	6680	.	15.3	AAGAAGGGGAAC
2-AAGAAGGAGAAC	STREME-2	cds_PVP01_1441300.1	694	705	.	15.3	AAGAAGGGGAAC
2-AAGAAGGAGAAC	STREME-2	cds_PVP01_1424300.1	3192	3203	.	15.3	AAGAAGGGGAAC
2-AAGAAGGAGAAC	STREME-2	cds_PVP01_1404700.1	23932	23943	.	15.3	AAGAAGGGGAAC
2-AAGAAGGAGAAC	STREME-2	cds_PVP01_0606900.1	16972	16983	.	15.3	AAGAAGGGGAAC
2-AAGAAGGAGAAC	STREME-2	cds_PVP01_1138300.1	1099	1110	.	15.3	AAGAAGGGGAAC
2-AAGAAGGAGAAC	STREME-2	cds_PVP01_0816800.1	691	702	.	15.3	AAGAAGGGGAAC
2-AAGAAGGAGAAC	STREME-2	cds_PVP01_1017200.1	5596	5607	.	15.18	AAGAGGGAGAAC
2-AAGAAGGAGAAC	STREME-2	cds_PVP01_0423400.1	5210	5221	.	15.18	AAGAGGGAGAAC
2-AAGAAGGAGAAC	STREME-2	cds_PVP01_0423400.1	5255	5266	.	15.18	AAGAGGGAGAAC
2-AAGAAGGAGAAC	STREME-2	cds_PVP01_0703000.1	2737	2748	.	15.18	AAGAGGGAGAAC
2-AAGAAGGAGAAC	STREME-2	cds_PVP01_0105300.1	29	40	.	15.18	AAGAGGGAGAAC
2-AAGAAGGAGAAC	STREME-2	cds_PVP01_0514700.1	799	810	.	15.18	AAGAGGGAGAAC
2-AAGAAGGAGAAC	STREME-2	cds_PVP01_0603400.1	6101	6112	.	15.15	AAGAAGGAGCAC
2-AAGAAGGAGAAC	STREME-2	cds_PVP01_0410100.1	2214	2225	.	15.15	AAGAAGGAGCAC
2-AAGAAGGAGAAC	STREME-2	cds_PVP01_1105700.1	19	30	.	15.15	AAGAAGGAGCAC
2-AAGAAGGAGAAC	STREME-2	cds_PVP01_0516600.1	349	360	.	15.15	AAGAAGGAGCAC
2-AAGAAGGAGAAC	STREME-2	cds_PVP01_1031400.1	2987	2998	.	15.13	AAGAAGCAGAUC
2-AAGAAGGAGAAC	STREME-2	cds_PVP01_1031100.1	326	337	.	15.13	AAGAAGCAGAUC
2-AAGAAGGAGAAC	STREME-2	cds_PVP01_1011300.1	613	624	.	15.04	AAGAAGGACGAC
2-AAGAAGGAGAAC	STREME-2	cds_PVP01_1414000.1	7513	7524	.	15.04	AAGAAGGACGAC
2-AAGAAGGAGAAC	STREME-2	cds_PVP01_0818400.1	4663	4674	.	14.99	AAGAAGGAGGUC
2-AAGAAGGAGAAC	STREME-2	cds_PVP01_0624500.1	809	820	.	14.99	AAGAAGGAGGUC
2-AAGAAGGAGAAC	STREME-2	cds_PVP01_0620000.1	2518	2529	.	14.99	AAGAAGGAGGUC
2-AAGAAGGAGAAC	STREME-2	cds_PVP01_0511000.1	3925	3936	.	14.94	AAGAAGCAGGAC
2-AAGAAGGAGAAC	STREME-2	cds_PVP01_0927700.1	172	183	.	14.94	AAGAAGCAGGAC
2-AAGAAGGAGAAC	STREME-2	cds_PVP01_0819500.1	83	94	.	14.94	AAGAAGCAGGAC
2-AAGAAGGAGAAC	STREME-2	cds_PVP01_0118400.1	1699	1710	.	14.94	AAGAAGCAGGAC
2-AAGAAGGAGAAC	STREME-2	cds_PVP01_0916700.1	3550	3561	.	14.81	AAGAAGGCGGAC
2-AAGAAGGAGAAC	STREME-2	cds_PVP01_1334400.1	2824	2835	.	14.81	AAGAAGGCGGAC
2-AAGAAGGAGAAC	STREME-2	cds_PVP01_0612800.1	273	284	.	14.81	AAGAAGGCGGAC
2-AAGAAGGAGAAC	STREME-2	cds_PVP01_0729100.1	209	220	.	14.69	AAGAAGGUCAAC
2-AAGAAGGAGAAC	STREME-2	cds_PVP01_0806600.1	353	364	.	14.62	AAGAAGUAGACC
2-AAGAAGGAGAAC	STREME-2	cds_PVP01_0934200.1	1139	1150	.	14.62	AAGAAGUAGACC
2-AAGAAGGAGAAC	STREME-2	cds_PVP01_1115100.1	9016	9027	.	14.59	AAGAAGGAGAAU
2-AAGAAGGAGAAC	STREME-2	cds_PVP01_1208400.1	2773	2784	.	14.59	AAGAAGGAGAAU
2-AAGAAGGAGAAC	STREME-2	cds_PVP01_1119800.1	13007	13018	.	14.59	AAGAAGGAGAAU
2-AAGAAGGAGAAC	STREME-2	cds_PVP01_1006800.1	1162	1173	.	14.59	AAGAAGGAGAAU
2-AAGAAGGAGAAC	STREME-2	cds_PVP01_0939000.1	3357	3368	.	14.59	AAGAAGGAGAAU
2-AAGAAGGAGAAC	STREME-2	cds_PVP01_0815000.1	7189	7200	.	14.49	AAGAAGGUGAUC
2-AAGAAGGAGAAC	STREME-2	cds_PVP01_0622000.1	2581	2592	.	14.43	AAGAAGGUGGAC
2-AAGAAGGAGAAC	STREME-2	cds_PVP01_1346500.1	571	582	.	14.43	AAGAAGGUGGAC
2-AAGAAGGAGAAC	STREME-2	cds_PVP01_0417700.1	1045	1056	.	14.43	AAGAAGGUGGAC
2-AAGAAGGAGAAC	STREME-2	cds_PVP01_0603100.1	1057	1068	.	14.41	AAGAAGAAGAUC
2-AAGAAGGAGAAC	STREME-2	cds_PVP01_1033900.1	779	790	.	14.41	AAGAAGAAGAUC
2-AAGAAGGAGAAC	STREME-2	cds_PVP01_1334800.1	94	105	.	14.41	AAGAAGAAGAUC
2-AAGAAGGAGAAC	STREME-2	cds_PVP01_1447300.1	5170	5181	.	14.41	AAGAAGAAGAUC
2-AAGAAGGAGAAC	STREME-2	cds_PVP01_1457300.1	1372	1383	.	14.4	AAGAAGCAGACC
2-AAGAAGGAGAAC	STREME-2	cds_PVP01_0823900.1	3494	3505	.	14.4	AAGAAGCAGACC
2-AAGAAGGAGAAC	STREME-2	cds_PVP01_0703700.1	6277	6288	.	14.25	AAGAAGGAUGAC
2-AAGAAGGAGAAC	STREME-2	cds_PVP01_0003380.1	1340	1351	.	14.23	AAGAAGUAGAAG
2-AAGAAGGAGAAC	STREME-2	cds_PVP01_1031300.1	2309	2320	.	14.23	AAGAAGUAGAAG
2-AAGAAGGAGAAC	STREME-2	cds_PVP01_0620600.1	896	907	.	14.23	AAGAAGUAGAAG
2-AAGAAGGAGAAC	STREME-2	cds_PVP01_0534300.1	3670	3681	.	14.23	AAGAAGUAGAAG
2-AAGAAGGAGAAC	STREME-2	cds_PVP01_0404300.1	659	670	.	14.23	AAGAAGUAGAAG
2-AAGAAGGAGAAC	STREME-2	cds_PVP01_0404300.1	713	724	.	14.23	AAGAAGUAGAAG
2-AAGAAGGAGAAC	STREME-2	cds_PVP01_1402400.1	4190	4201	.	14.23	AAGAAGUAGAAG
2-AAGAAGGAGAAC	STREME-2	cds_PVP01_0702000.1	1598	1609	.	14.23	AAGAAGUAGAAG
2-AAGAAGGAGAAC	STREME-2	cds_PVP01_1408900.1	1196	1207	.	14.22	AAGAAGAAGGAC
2-AAGAAGGAGAAC	STREME-2	cds_PVP01_0520500.1	505	516	.	14.22	AAGAAGAAGGAC
2-AAGAAGGAGAAC	STREME-2	cds_PVP01_0604700.1	2126	2137	.	14.22	AAGAAGAAGGAC
2-AAGAAGGAGAAC	STREME-2	cds_PVP01_1131900.1	135	146	.	14.22	AAGAAGAAGGAC
2-AAGAAGGAGAAC	STREME-2	cds_PVP01_0004370.1	866	877	.	14.22	AAGAAGAAGGAC
2-AAGAAGGAGAAC	STREME-2	cds_PVP01_0701100.1	7320	7331	.	14.22	AAGAAGAAGGAC
2-AAGAAGGAGAAC	STREME-2	cds_PVP01_0418200.1	3159	3170	.	14.22	AAGAAGAAGGAC
2-AAGAAGGAGAAC	STREME-2	cds_PVP01_0931500.1	2077	2088	.	14.2	AAGAAGGACAUC
2-AAGAAGGAGAAC	STREME-2	cds_PVP01_1022500.1	24244	24255	.	14.2	AAGAAGGACAUC
2-AAGAAGGAGAAC	STREME-2	cds_PVP01_1242900.1	2071	2082	.	14.2	AAGAAGGACAUC
2-AAGAAGGAGAAC	STREME-2	cds_PVP01_1145100.1	5542	5553	.	14.2	AAGAAGGACAUC
2-AAGAAGGAGAAC	STREME-2	cds_PVP01_1131900.1	138	149	.	14.2	AAGAAGGACAUC
2-AAGAAGGAGAAC	STREME-2	cds_PVP01_0938100.1	1132	1143	.	14.2	AAGAAGGACAUC
2-AAGAAGGAGAAC	STREME-2	cds_PVP01_0705900.1	1282	1293	.	14.2	AAGAAGGACAUC
2-AAGAAGGAGAAC	STREME-2	cds_PVP01_1105600.1	1288	1299	.	14.2	AAGAAGGACAUC
2-AAGAAGGAGAAC	STREME-2	cds_PVP01_1132000.1	2888	2899	.	14.16	AAGAAGGCUAAC
2-AAGAAGGAGAAC	STREME-2	cds_PVP01_0934200.1	1525	1536	.	14.16	AAGAAGGCUAAC
2-AAGAAGGAGAAC	STREME-2	cds_PVP01_1110200.1	2370	2381	.	14.13	AAGAAGGCCAAC
2-AAGAAGGAGAAC	STREME-2	cds_PVP01_0707900.1	4012	4023	.	14.13	AAGAAGGCCAAC
2-AAGAAGGAGAAC	STREME-2	cds_PVP01_1316000.1	1153	1164	.	14.13	AAGAAGGCCAAC
2-AAGAAGGAGAAC	STREME-2	cds_PVP01_1306100.1	6073	6084	.	14.13	AAGAAGGCCAAC
2-AAGAAGGAGAAC	STREME-2	cds_PVP01_0415200.1	1330	1341	.	14.1	CAGAAGGAGAUC
2-AAGAAGGAGAAC	STREME-2	cds_PVP01_0936900.1	554	565	.	14.1	AAGAAGUAGAGC
2-AAGAAGGAGAAC	STREME-2	cds_PVP01_0010200.1	1667	1678	.	14.1	AAGAAGCACAAC
2-AAGAAGGAGAAC	STREME-2	cds_PVP01_1441600.1	3973	3984	.	14.1	AAGAAGCACAAC
2-AAGAAGGAGAAC	STREME-2	cds_PVP01_1315700.1	3943	3954	.	14.1	AAGAAGCACAAC
2-AAGAAGGAGAAC	STREME-2	cds_PVP01_0730800.1	1007	1018	.	14.08	AAGCAGGAGAAC
2-AAGAAGGAGAAC	STREME-2	cds_PVP01_0405000.1	6893	6904	.	14.08	AAGCAGGAGAAC
2-AAGAAGGAGAAC	STREME-2	cds_PVP01_1121400.1	4834	4845	.	14.07	AAGAAGCUGAAC
2-AAGAAGGAGAAC	STREME-2	cds_PVP01_0505800.1	1015	1026	.	14.07	AAGAAGCUGAAC
2-AAGAAGGAGAAC	STREME-2	cds_PVP01_1471700.1	785	796	.	14.07	AAGAAGCUGAAC
2-AAGAAGGAGAAC	STREME-2	cds_PVP01_0405000.1	4592	4603	.	14.07	AAGAAGCUGAAC
2-AAGAAGGAGAAC	STREME-2	cds_PVP01_0706700.1	4843	4854	.	14.07	AAGAAGCUGAAC
2-AAGAAGGAGAAC	STREME-2	cds_PVP01_0114800.1	4210	4221	.	14.07	AAGAAGCUGAAC
2-AAGAAGGAGAAC	STREME-2	cds_PVP01_0305300.1	1563	1574	.	14.06	AAGAAGUCGAAC
2-AAGAAGGAGAAC	STREME-2	cds_PVP01_1017200.1	412	423	.	14.04	AAGAAGGACUAC
2-AAGAAGGAGAAC	STREME-2	cds_PVP01_1022500.1	11659	11670	.	14.04	AAGAAGGACUAC
2-AAGAAGGAGAAC	STREME-2	cds_PVP01_0913800.1	9889	9900	.	14.02	AAGAAGACGAAC
2-AAGAAGGAGAAC	STREME-2	cds_PVP01_1409000.1	419	430	.	14.02	AAGAAGACGAAC
2-AAGAAGGAGAAC	STREME-2	cds_PVP01_0315600.1	889	900	.	14.02	AAGAAGACGAAC
2-AAGAAGGAGAAC	STREME-2	cds_PVP01_1029200.1	11980	11991	.	14.02	AAGAAGACGAAC
2-AAGAAGGAGAAC	STREME-2	cds_PVP01_1346000.1	4772	4783	.	14.02	AAGAAGACGAAC
2-AAGAAGGAGAAC	STREME-2	cds_PVP01_1113900.1	1685	1696	.	14.02	AAGAAGACGAAC
2-AAGAAGGAGAAC	STREME-2	cds_PVP01_1144400.1	224	235	.	14.02	AAGAAGACGAAC
2-AAGAAGGAGAAC	STREME-2	cds_PVP01_1316100.1	10993	11004	.	14.02	AAGAAGCAGAAG
2-AAGAAGGAGAAC	STREME-2	cds_PVP01_1316100.1	14299	14310	.	14.02	AAGAAGCAGAAG
2-AAGAAGGAGAAC	STREME-2	cds_PVP01_0931500.1	2125	2136	.	14.02	AAGAAGCAGAAG
2-AAGAAGGAGAAC	STREME-2	cds_PVP01_1031600.1	656	667	.	14.02	AAGAAGCAGAAG
2-AAGAAGGAGAAC	STREME-2	cds_PVP01_1031700.1	350	361	.	14.02	AAGAAGCAGAAG
2-AAGAAGGAGAAC	STREME-2	cds_PVP01_1031700.1	698	709	.	14.02	AAGAAGCAGAAG
2-AAGAAGGAGAAC	STREME-2	cds_PVP01_1031700.1	1397	1408	.	14.02	AAGAAGCAGAAG
2-AAGAAGGAGAAC	STREME-2	cds_PVP01_1031400.1	2120	2131	.	14.02	AAGAAGCAGAAG
2-AAGAAGGAGAAC	STREME-2	cds_PVP01_1022500.1	31444	31455	.	14.02	AAGAAGCAGAAG
2-AAGAAGGAGAAC	STREME-2	cds_PVP01_0529300.1	9181	9192	.	14.02	AAGAAGCAGAAG
2-AAGAAGGAGAAC	STREME-2	cds_PVP01_0529300.1	9433	9444	.	14.02	AAGAAGCAGAAG
2-AAGAAGGAGAAC	STREME-2	cds_PVP01_0609100.1	9569	9580	.	14.02	AAGAAGCAGAAG
2-AAGAAGGAGAAC	STREME-2	cds_PVP01_0117600.1	3445	3456	.	14.02	AAGAAGCAGAAG
2-AAGAAGGAGAAC	STREME-2	cds_PVP01_1031300.1	2351	2362	.	14.02	AAGAAGCAGAAG
2-AAGAAGGAGAAC	STREME-2	cds_PVP01_1457300.1	4540	4551	.	14.02	AAGAAGCAGAAG
2-AAGAAGGAGAAC	STREME-2	cds_PVP01_1419200.1	4063	4074	.	14.02	AAGAAGCAGAAG
2-AAGAAGGAGAAC	STREME-2	cds_PVP01_1025100.1	7421	7432	.	14.02	AAGAAGCAGAAG
2-AAGAAGGAGAAC	STREME-2	cds_PVP01_1461000.1	369	380	.	14.02	AAGAAGCAGAAG
2-AAGAAGGAGAAC	STREME-2	cds_PVP01_1211000.1	1690	1701	.	14.02	AAGAAGCAGAAG
2-AAGAAGGAGAAC	STREME-2	cds_PVP01_0821300.1	1222	1233	.	14.02	AAGAAGCAGAAG
2-AAGAAGGAGAAC	STREME-2	cds_PVP01_1413000.1	1168	1179	.	14.02	AAGAAGCAGAAG
2-AAGAAGGAGAAC	STREME-2	cds_PVP01_0939800.1	3524	3535	.	14.02	AAGAAGCAGAAG
2-AAGAAGGAGAAC	STREME-2	cds_PVP01_1227800.1	11424	11435	.	14.02	AAGAAGCAGAAG
2-AAGAAGGAGAAC	STREME-2	cds_PVP01_1131900.1	228	239	.	14.02	AAGAAGCAGAAG
2-AAGAAGGAGAAC	STREME-2	cds_PVP01_1445600.1	175	186	.	14.02	AAGAAGCAGAAG
2-AAGAAGGAGAAC	STREME-2	cds_PVP01_1445600.1	211	222	.	14.02	AAGAAGCAGAAG
2-AAGAAGGAGAAC	STREME-2	cds_PVP01_0939400.1	160	171	.	14.02	AAGAAGCAGAAG
2-AAGAAGGAGAAC	STREME-2	cds_PVP01_0903800.1	905	916	.	14.02	AAGAAGCAGAAG
2-AAGAAGGAGAAC	STREME-2	cds_PVP01_0814200.1	1796	1807	.	14.02	AAGAAGCAGAAG
2-AAGAAGGAGAAC	STREME-2	cds_PVP01_1142900.1	3121	3132	.	14.02	AAGAAGCAGAAG
2-AAGAAGGAGAAC	STREME-2	cds_PVP01_1136900.1	4198	4209	.	14	AAGAAGGAGGCC
2-AAGAAGGAGAAC	STREME-2	cds_PVP01_1240500.1	50	61	.	14	AAGAAGGAGGCC
2-AAGAAGGAGAAC	STREME-2	cds_PVP01_0520500.1	107	118	.	14	AAGAAGGAGGCC
2-AAGAAGGAGAAC	STREME-2	cds_PVP01_1404700.1	16981	16992	.	14	AAGAAGGAGGCC
2-AAGAAGGAGAAC	STREME-2	cds_PVP01_1447000.1	3847	3858	.	14	AAGAAGGAGGCC
2-AAGAAGGAGAAC	STREME-2	cds_PVP01_1447000.1	4120	4131	.	14	AAGAAGGAGGCC
2-AAGAAGGAGAAC	STREME-2	cds_PVP01_0604700.1	2420	2431	.	14	AAGAAGGAGGCC
2-AAGAAGGAGAAC	STREME-2	cds_PVP01_1441400.1	859	870	.	13.96	AAGAAGCAGUAC
2-AAGAAGGAGAAC	STREME-2	cds_PVP01_0807700.1	4492	4503	.	13.96	AAGAAGCAGUAC
2-AAGAAGGAGAAC	STREME-2	cds_PVP01_0010200.1	2297	2308	.	13.94	CAGAAGCAGAAC
2-AAGAAGGAGAAC	STREME-2	cds_PVP01_0417700.1	248	259	.	13.94	CAGAAGCAGAAC
2-AAGAAGGAGAAC	STREME-2	cds_PVP01_0105700.1	3800	3811	.	13.93	AAGAAGGACAAG
2-AAGAAGGAGAAC	STREME-2	cds_PVP01_1321100.1	2620	2631	.	13.93	AAGAAGGACAAG
2-AAGAAGGAGAAC	STREME-2	cds_PVP01_1119800.1	5003	5014	.	13.93	AAGAAGGACAAG
2-AAGAAGGAGAAC	STREME-2	cds_PVP01_0320400.1	3044	3055	.	13.93	AAGAAGGACAAG
2-AAGAAGGAGAAC	STREME-2	cds_PVP01_0604700.1	2129	2140	.	13.93	AAGAAGGACAAG
2-AAGAAGGAGAAC	STREME-2	cds_PVP01_0928300.1	203	214	.	13.93	AAGAAGGACAAG
2-AAGAAGGAGAAC	STREME-2	cds_PVP01_1144400.1	7422	7433	.	13.93	AAGAAGGACAAG
2-AAGAAGGAGAAC	STREME-2	cds_PVP01_0212100.1	4177	4188	.	13.92	CAGAAGGAGGAC
2-AAGAAGGAGAAC	STREME-2	cds_PVP01_1128400.1	2701	2712	.	13.92	CAGAAGGAGGAC
2-AAGAAGGAGAAC	STREME-2	cds_PVP01_0728900.1	3484	3495	.	13.92	CAGAAGGAGGAC
2-AAGAAGGAGAAC	STREME-2	cds_PVP01_0316400.1	868	879	.	13.92	AAGAAGGCGACC
2-AAGAAGGAGAAC	STREME-2	cds_PVP01_1305400.1	7121	7132	.	13.91	AAGAGGUAGAAC
2-AAGAAGGAGAAC	STREME-2	cds_PVP01_1031100.1	455	466	.	13.91	AAGAGGUAGAAC
2-AAGAAGGAGAAC	STREME-2	cds_PVP01_1025500.1	1393	1404	.	13.9	AAGAAGGUUAAC
2-AAGAAGGAGAAC	STREME-2	cds_PVP01_1130500.1	2494	2505	.	13.9	AAGAAGGUUAAC
2-AAGAAGGAGAAC	STREME-2	cds_PVP01_0116000.1	199	210	.	13.89	AAGAAGCAGAGC
2-AAGAAGGAGAAC	STREME-2	cds_PVP01_0117700.1	988	999	.	13.89	AAGAAGCAGAGC
2-AAGAAGGAGAAC	STREME-2	cds_PVP01_1211700.1	868	879	.	13.89	AAGAAGCAGAGC
2-AAGAAGGAGAAC	STREME-2	cds_PVP01_1211000.1	18853	18864	.	13.89	AAGAAGCAGAGC
2-AAGAAGGAGAAC	STREME-2	cds_PVP01_1235400.1	521	532	.	13.89	AAGAAGCAGAGC
2-AAGAAGGAGAAC	STREME-2	cds_PVP01_1446800.1	1216	1227	.	13.85	GAGAAGGAGAAC
2-AAGAAGGAGAAC	STREME-2	cds_PVP01_0924100.1	2587	2598	.	13.85	GAGAAGGAGAAC
2-AAGAAGGAGAAC	STREME-2	cds_PVP01_1227100.1	565	576	.	13.85	GAGAAGGAGAAC
2-AAGAAGGAGAAC	STREME-2	cds_PVP01_1227100.1	637	648	.	13.85	GAGAAGGAGAAC
2-AAGAAGGAGAAC	STREME-2	cds_PVP01_0727700.1	46	57	.	13.85	GAGAAGGAGAAC
2-AAGAAGGAGAAC	STREME-2	cds_PVP01_0417600.1	2465	2476	.	13.85	CAGAAGGACAAC
2-AAGAAGGAGAAC	STREME-2	cds_PVP01_1031400.1	872	883	.	13.83	AAGAGGCAGAAC
2-AAGAAGGAGAAC	STREME-2	cds_PVP01_0908600.1	3361	3372	.	13.83	AAGAGGCAGAAC
2-AAGAAGGAGAAC	STREME-2	cds_PVP01_0724600.1	5346	5357	.	13.83	AAGAGGCAGAAC
2-AAGAAGGAGAAC	STREME-2	cds_PVP01_0709000.1	124	135	.	13.83	AAGAAGGAUAGC
2-AAGAAGGAGAAC	STREME-2	cds_PVP01_0607000.1	1767	1778	.	13.83	AAGAAGGAUAGC
2-AAGAAGGAGAAC	STREME-2	cds_PVP01_0529800.1	9844	9855	.	13.82	AAGAAGAACAAC
2-AAGAAGGAGAAC	STREME-2	cds_PVP01_1022500.1	4702	4713	.	13.82	AAGAAGAACAAC
2-AAGAAGGAGAAC	STREME-2	cds_PVP01_1225400.1	3580	3591	.	13.82	AAGAAGAACAAC
2-AAGAAGGAGAAC	STREME-2	cds_PVP01_1033900.1	1763	1774	.	13.82	AAGAAGAACAAC
2-AAGAAGGAGAAC	STREME-2	cds_PVP01_0912900.1	6085	6096	.	13.82	AAGAAGAACAAC
2-AAGAAGGAGAAC	STREME-2	cds_PVP01_0520500.1	1105	1116	.	13.82	AAGAAGAACAAC
2-AAGAAGGAGAAC	STREME-2	cds_PVP01_1229900.1	8	19	.	13.82	AAGAAGAACAAC
2-AAGAAGGAGAAC	STREME-2	cds_PVP01_1115800.1	796	807	.	13.82	AAGAAGAACAAC
2-AAGAAGGAGAAC	STREME-2	cds_PVP01_0423300.1	52	63	.	13.82	AAGAAGAACAAC
2-AAGAAGGAGAAC	STREME-2	cds_PVP01_0727700.1	364	375	.	13.82	AAGAAGAACAAC
2-AAGAAGGAGAAC	STREME-2	cds_PVP01_1002900.1	3667	3678	.	13.82	AAGAAGAACAAC
2-AAGAAGGAGAAC	STREME-2	cds_PVP01_0316400.1	3397	3408	.	13.82	AAGAAGAACAAC
2-AAGAAGGAGAAC	STREME-2	cds_PVP01_1105700.1	7663	7674	.	13.79	AAUAAGGAGAUC
2-AAGAAGGAGAAC	STREME-2	cds_PVP01_0604300.1	166	177	.	13.79	AAGAAGGAGAUG
2-AAGAAGGAGAAC	STREME-2	cds_PVP01_1135300.1	11581	11592	.	13.79	AAGAAGGAGAUG
2-AAGAAGGAGAAC	STREME-2	cds_PVP01_1227100.1	398	409	.	13.79	AAGAAGGAGAUG
2-AAGAAGGAGAAC	STREME-2	cds_PVP01_0914600.1	541	552	.	13.77	AAGAAGGUGACC
2-AAGAAGGAGAAC	STREME-2	cds_PVP01_0104800.1	11227	11238	.	13.77	AAGAAGGUGACC
2-AAGAAGGAGAAC	STREME-2	cds_PVP01_1031000.1	2428	2439	.	13.77	AAGAAGGUGACC
2-AAGAAGGAGAAC	STREME-2	cds_PVP01_1031700.1	2237	2248	.	13.77	AAGAAGGAGACG
2-AAGAAGGAGAAC	STREME-2	cds_PVP01_0418400.1	662	673	.	13.77	AAGAAGGAGACG
2-AAGAAGGAGAAC	STREME-2	cds_PVP01_1023900.1	3122	3133	.	13.77	AAGAAGGAGACG
2-AAGAAGGAGAAC	STREME-2	cds_PVP01_1121400.1	16727	16738	.	13.77	AAGAAGGAGACG
2-AAGAAGGAGAAC	STREME-2	cds_PVP01_0603900.1	955	966	.	13.7	AAGAAGGAGGGC
2-AAGAAGGAGAAC	STREME-2	cds_PVP01_0106700.1	2164	2175	.	13.7	AAGAAGGAGGGC
2-AAGAAGGAGAAC	STREME-2	cds_PVP01_0731000.1	403	414	.	13.7	AAGAAGGAGGGC
2-AAGAAGGAGAAC	STREME-2	cds_PVP01_0721700.1	2206	2217	.	13.7	AAGAAGGAGGGC
2-AAGAAGGAGAAC	STREME-2	cds_PVP01_1211100.1	451	462	.	13.7	AAGAAGGAGGGC
2-AAGAAGGAGAAC	STREME-2	cds_PVP01_0117000.1	376	387	.	13.7	AAGAAGGAGGGC
2-AAGAAGGAGAAC	STREME-2	cds_PVP01_0212100.1	2669	2680	.	13.7	AAGAAGCAUAAC
2-AAGAAGGAGAAC	STREME-2	cds_PVP01_1022500.1	13030	13041	.	13.68	AAGAAGAAGACC
2-AAGAAGGAGAAC	STREME-2	cds_PVP01_0529300.1	6628	6639	.	13.68	AAGAAGAAGACC
2-AAGAAGGAGAAC	STREME-2	cds_PVP01_0113600.1	2728	2739	.	13.68	AAGAAGGACAGC
2-AAGAAGGAGAAC	STREME-2	cds_PVP01_0620800.1	566	577	.	13.68	AAGAAGGACAGC
2-AAGAAGGAGAAC	STREME-2	cds_PVP01_1340300.1	5749	5760	.	13.68	AAGAAGGACAGC
2-AAGAAGGAGAAC	STREME-2	cds_PVP01_0529800.1	10117	10128	.	13.68	AAGAAGGAGGAG
2-AAGAAGGAGAAC	STREME-2	cds_PVP01_0709000.1	2089	2100	.	13.68	AAGAAGGAGGAG
2-AAGAAGGAGAAC	STREME-2	cds_PVP01_1135000.1	677	688	.	13.68	AAGAAGGAGGAG
2-AAGAAGGAGAAC	STREME-2	cds_PVP01_0527700.1	1567	1578	.	13.68	AAGAAGGAGGAG
2-AAGAAGGAGAAC	STREME-2	cds_PVP01_0106700.1	211	222	.	13.68	AAGAAGGAGGAG
2-AAGAAGGAGAAC	STREME-2	cds_PVP01_1022500.1	25987	25998	.	13.68	AAGAAGGAGGAG
2-AAGAAGGAGAAC	STREME-2	cds_PVP01_0928700.1	5554	5565	.	13.68	AAGAAGGAGGAG
2-AAGAAGGAGAAC	STREME-2	cds_PVP01_0723100.1	797	808	.	13.68	AAGAAGGAGGAG
2-AAGAAGGAGAAC	STREME-2	cds_PVP01_0105700.1	1484	1495	.	13.68	AAGAAGGAGGAG
2-AAGAAGGAGAAC	STREME-2	cds_PVP01_1114500.1	1981	1992	.	13.68	AAGAAGGAGGAG
2-AAGAAGGAGAAC	STREME-2	cds_PVP01_0930000.1	2920	2931	.	13.68	AAGAAGGAGGAG
2-AAGAAGGAGAAC	STREME-2	cds_PVP01_1220600.1	1354	1365	.	13.68	AAGAAGGAGGAG
2-AAGAAGGAGAAC	STREME-2	cds_PVP01_1466900.1	577	588	.	13.68	AAGAAGGAGGAG
2-AAGAAGGAGAAC	STREME-2	cds_PVP01_1208400.1	2246	2257	.	13.68	AAGAAGGAGGAG
2-AAGAAGGAGAAC	STREME-2	cds_PVP01_1446800.1	761	772	.	13.68	AAGAAGGAGGAG
2-AAGAAGGAGAAC	STREME-2	cds_PVP01_1121400.1	13135	13146	.	13.68	AAGAAGGAGGAG
2-AAGAAGGAGAAC	STREME-2	cds_PVP01_1112200.1	9565	9576	.	13.68	AAGAAGGAGGAG
2-AAGAAGGAGAAC	STREME-2	cds_PVP01_1346000.1	4757	4768	.	13.68	AAGAAGGAGGAG
2-AAGAAGGAGAAC	STREME-2	cds_PVP01_1125700.1	5546	5557	.	13.68	AAGAAGGAGGAG
2-AAGAAGGAGAAC	STREME-2	cds_PVP01_1227800.1	882	893	.	13.68	AAGAAGGAGGAG
2-AAGAAGGAGAAC	STREME-2	cds_PVP01_0817100.1	2890	2901	.	13.68	AAGAAGGAGGAG
2-AAGAAGGAGAAC	STREME-2	cds_PVP01_1313500.1	550	561	.	13.68	AAGAAGGAGGAG
2-AAGAAGGAGAAC	STREME-2	cds_PVP01_1329900.1	706	717	.	13.68	AAGAAGGAGGAG
2-AAGAAGGAGAAC	STREME-2	cds_PVP01_1313200.1	1993	2004	.	13.68	AAGAAGGAGGAG
2-AAGAAGGAGAAC	STREME-2	cds_PVP01_0316400.1	6013	6024	.	13.68	AAGAAGGAGGAG
2-AAGAAGGAGAAC	STREME-2	cds_PVP01_0309100.1	1519	1530	.	13.67	AAGAAGUACAAC
2-AAGAAGGAGAAC	STREME-2	cds_PVP01_0105000.1	3487	3498	.	13.67	AAGAAGUACAAC
2-AAGAAGGAGAAC	STREME-2	cds_PVP01_0421000.1	3166	3177	.	13.67	AAGAAGUACAAC
2-AAGAAGGAGAAC	STREME-2	cds_PVP01_1450900.1	718	729	.	13.66	AAGAAGAUGAAC
2-AAGAAGGAGAAC	STREME-2	cds_PVP01_1271200.1	189	200	.	13.66	AAGAAGAUGAAC
2-AAGAAGGAGAAC	STREME-2	cds_PVP01_1250900.1	1235	1246	.	13.66	AAGAAGAUGAAC
2-AAGAAGGAGAAC	STREME-2	cds_PVP01_0000130.1	443	454	.	13.66	AAGAAGAUGAAC
2-AAGAAGGAGAAC	STREME-2	cds_PVP01_1121400.1	3418	3429	.	13.66	AAGAAGAUGAAC
2-AAGAAGGAGAAC	STREME-2	cds_PVP01_1428600.1	2668	2679	.	13.66	AAGAAGAUGAAC
2-AAGAAGGAGAAC	STREME-2	cds_PVP01_0915600.1	2025	2036	.	13.62	AAUAAGCAGAAC
2-AAGAAGGAGAAC	STREME-2	cds_PVP01_1427100.1	382	393	.	13.62	AAUAAGCAGAAC
2-AAGAAGGAGAAC	STREME-2	cds_PVP01_1022500.1	9976	9987	.	13.61	AAUAAGGAGGAC
2-AAGAAGGAGAAC	STREME-2	cds_PVP01_0309100.1	991	1002	.	13.61	AAUAAGGAGGAC
2-AAGAAGGAGAAC	STREME-2	cds_PVP01_1124900.1	5938	5949	.	13.61	AAUAAGGAGGAC
2-AAGAAGGAGAAC	STREME-2	cds_PVP01_1415900.1	100	111	.	13.58	AAGAAGGAUAUC
2-AAGAAGGAGAAC	STREME-2	cds_PVP01_1260300.1	652	663	.	13.58	AAGAAGGAUAUC
2-AAGAAGGAGAAC	STREME-2	cds_PVP01_1143600.1	275	286	.	13.56	AAGAAGGGGAUC
2-AAGAAGGAGAAC	STREME-2	cds_PVP01_0815000.1	4792	4803	.	13.56	AAGAAGGGGAUC
2-AAGAAGGAGAAC	STREME-2	cds_PVP01_0912900.1	583	594	.	13.56	AAGAAGGGGAUC
2-AAGAAGGAGAAC	STREME-2	cds_PVP01_0207400.1	3325	3336	.	13.56	AAGAAGGGGAUC
2-AAGAAGGAGAAC	STREME-2	cds_PVP01_0906100.1	422	433	.	13.56	AAGAAGGGGAUC
2-AAGAAGGAGAAC	STREME-2	cds_PVP01_0112000.1	211	222	.	13.53	AAGAAGGCGAAG
2-AAGAAGGAGAAC	STREME-2	cds_PVP01_1318000.1	2090	2101	.	13.53	AAGAAGGCGAAG
2-AAGAAGGAGAAC	STREME-2	cds_PVP01_1266900.1	1823	1834	.	13.53	AAGAAGGCGAAG
2-AAGAAGGAGAAC	STREME-2	cds_PVP01_1266900.1	1832	1843	.	13.53	AAGAAGGCGAAG
2-AAGAAGGAGAAC	STREME-2	cds_PVP01_1266900.1	1841	1852	.	13.53	AAGAAGGCGAAG
2-AAGAAGGAGAAC	STREME-2	cds_PVP01_1452400.1	1559	1570	.	13.53	AAGAAGGCGAAG
2-AAGAAGGAGAAC	STREME-2	cds_PVP01_0835000.1	332	343	.	13.53	AAGAAGGCGAAG
2-AAGAAGGAGAAC	STREME-2	cds_PVP01_0118100.1	5560	5571	.	13.53	AAGAAGGCGAAG
2-AAGAAGGAGAAC	STREME-2	cds_PVP01_1132900.1	613	624	.	13.53	AAUAAGGACAAC
2-AAGAAGGAGAAC	STREME-2	cds_PVP01_1003600.1	2449	2460	.	13.53	AAUAAGGACAAC
2-AAGAAGGAGAAC	STREME-2	cds_PVP01_1266900.1	388	399	.	13.53	AAUAAGGACAAC
2-AAGAAGGAGAAC	STREME-2	cds_PVP01_1227100.1	220	231	.	13.53	AAUAAGGACAAC
2-AAGAAGGAGAAC	STREME-2	cds_PVP01_1249000.1	7480	7491	.	13.48	AAGAAGGAUAAG
2-AAGAAGGAGAAC	STREME-2	cds_PVP01_0114900.1	748	759	.	13.48	AAGAAGGAUAAG
2-AAGAAGGAGAAC	STREME-2	cds_PVP01_1006800.1	2515	2526	.	13.47	AAGAAGGGCAAC
2-AAGAAGGAGAAC	STREME-2	cds_PVP01_0714400.1	2280	2291	.	13.47	AAGAAGGGCAAC
2-AAGAAGGAGAAC	STREME-2	cds_PVP01_0306000.1	241	252	.	13.47	AAGAAGGGCAAC
2-AAGAAGGAGAAC	STREME-2	cds_PVP01_0214800.1	2999	3010	.	13.42	AAGAAGGACACC
2-AAGAAGGAGAAC	STREME-2	cds_PVP01_0816800.1	2120	2131	.	13.42	AAGAAGGACACC
2-AAGAAGGAGAAC	STREME-2	cds_PVP01_1428700.1	4168	4179	.	13.4	CAGAAGGAUAAC
2-AAGAAGGAGAAC	STREME-2	cds_PVP01_0114900.1	922	933	.	13.4	CAGAAGGAUAAC
2-AAGAAGGAGAAC	STREME-2	cds_PVP01_0511700.1	415	426	.	13.4	CAGAAGGAUAAC
2-AAGAAGGAGAAC	STREME-2	cds_PVP01_0604200.1	6401	6412	.	13.4	AAGAAGGCGAGC
2-AAGAAGGAGAAC	STREME-2	cds_PVP01_1125700.1	3769	3780	.	13.4	AAGAAGGCGAGC
2-AAGAAGGAGAAC	STREME-2	cds_PVP01_0936200.1	124	135	.	13.38	AAGAAGGUGAAG
2-AAGAAGGAGAAC	STREME-2	cds_PVP01_1439600.1	308	319	.	13.38	AAGAAGGUGAAG
2-AAGAAGGAGAAC	STREME-2	cds_PVP01_0612400.1	1174	1185	.	13.38	AAGAAGGUGAAG
2-AAGAAGGAGAAC	STREME-2	cds_PVP01_1033900.1	5627	5638	.	13.38	AAGAAGGUGAAG
2-AAGAAGGAGAAC	STREME-2	cds_PVP01_0517600.1	1312	1323	.	13.38	AAGAAGGUGAAG
2-AAGAAGGAGAAC	STREME-2	cds_PVP01_0703700.1	17431	17442	.	13.38	AAGAAGGUGAAG
2-AAGAAGGAGAAC	STREME-2	cds_PVP01_1011500.1	13029	13040	.	13.38	AAGAAGGUGAAG
2-AAGAAGGAGAAC	STREME-2	cds_PVP01_0931600.1	1195	1206	.	13.38	AAGAAGGUGAAG
2-AAGAAGGAGAAC	STREME-2	cds_PVP01_1469800.1	482	493	.	13.38	AAGAAGGUGAAG
2-AAGAAGGAGAAC	STREME-2	cds_PVP01_0210400.1	32	43	.	13.38	AAGAAGGUGAAG
2-AAGAAGGAGAAC	STREME-2	cds_PVP01_0931900.1	967	978	.	13.38	AAGAAGGUGAAG
2-AAGAAGGAGAAC	STREME-2	cds_PVP01_1312900.1	331	342	.	13.38	AAGAAGGUGAAG
2-AAGAAGGAGAAC	STREME-2	cds_PVP01_0724600.1	245	256	.	13.38	AAGAAGGUGAAG
2-AAGAAGGAGAAC	STREME-2	cds_PVP01_1123500.1	2257	2268	.	13.38	AAGAAGGUGAAG
2-AAGAAGGAGAAC	STREME-2	cds_PVP01_0725200.1	562	573	.	13.38	CAGAAGGAGACC
2-AAGAAGGAGAAC	STREME-2	cds_PVP01_1322500.1	2496	2507	.	13.38	AAGAAGGGGGAC
2-AAGAAGGAGAAC	STREME-2	cds_PVP01_0931900.1	2191	2202	.	13.38	AAGAAGGGGGAC
2-AAGAAGGAGAAC	STREME-2	cds_PVP01_0107700.1	1759	1770	.	13.38	AAGAAGGGGGAC
2-AAGAAGGAGAAC	STREME-2	cds_PVP01_1447000.1	6799	6810	.	13.3	CAGAAGGUGAAC
2-AAGAAGGAGAAC	STREME-2	cds_PVP01_0213800.1	3717	3728	.	13.3	AAGAAGAAGAAG
2-AAGAAGGAGAAC	STREME-2	cds_PVP01_0214800.1	2891	2902	.	13.3	AAGAAGAAGAAG
2-AAGAAGGAGAAC	STREME-2	cds_PVP01_1316100.1	13654	13665	.	13.3	AAGAAGAAGAAG
2-AAGAAGGAGAAC	STREME-2	cds_PVP01_1402200.1	272	283	.	13.3	AAGAAGAAGAAG
2-AAGAAGGAGAAC	STREME-2	cds_PVP01_0529800.1	9352	9363	.	13.3	AAGAAGAAGAAG
2-AAGAAGGAGAAC	STREME-2	cds_PVP01_1135000.1	671	682	.	13.3	AAGAAGAAGAAG
2-AAGAAGGAGAAC	STREME-2	cds_PVP01_0730800.1	1127	1138	.	13.3	AAGAAGAAGAAG
2-AAGAAGGAGAAC	STREME-2	cds_PVP01_0527700.1	529	540	.	13.3	AAGAAGAAGAAG
2-AAGAAGGAGAAC	STREME-2	cds_PVP01_0110400.1	6307	6318	.	13.3	AAGAAGAAGAAG
2-AAGAAGGAGAAC	STREME-2	cds_PVP01_0311300.1	4708	4719	.	13.3	AAGAAGAAGAAG
2-AAGAAGGAGAAC	STREME-2	cds_PVP01_1031400.1	2981	2992	.	13.3	AAGAAGAAGAAG
2-AAGAAGGAGAAC	STREME-2	cds_PVP01_1022500.1	25975	25986	.	13.3	AAGAAGAAGAAG
2-AAGAAGGAGAAC	STREME-2	cds_PVP01_1022500.1	25978	25989	.	13.3	AAGAAGAAGAAG
2-AAGAAGGAGAAC	STREME-2	cds_PVP01_1022500.1	25981	25992	.	13.3	AAGAAGAAGAAG
2-AAGAAGGAGAAC	STREME-2	cds_PVP01_0916700.1	3544	3555	.	13.3	AAGAAGAAGAAG
2-AAGAAGGAGAAC	STREME-2	cds_PVP01_0529300.1	9400	9411	.	13.3	AAGAAGAAGAAG
2-AAGAAGGAGAAC	STREME-2	cds_PVP01_0208800.1	1969	1980	.	13.3	AAGAAGAAGAAG
2-AAGAAGGAGAAC	STREME-2	cds_PVP01_0928700.1	5548	5559	.	13.3	AAGAAGAAGAAG
2-AAGAAGGAGAAC	STREME-2	cds_PVP01_1417500.1	394	405	.	13.3	AAGAAGAAGAAG
2-AAGAAGGAGAAC	STREME-2	cds_PVP01_1421500.1	1162	1173	.	13.3	AAGAAGAAGAAG
2-AAGAAGGAGAAC	STREME-2	cds_PVP01_1260500.1	6496	6507	.	13.3	AAGAAGAAGAAG
2-AAGAAGGAGAAC	STREME-2	cds_PVP01_0004220.1	173	184	.	13.3	AAGAAGAAGAAG
2-AAGAAGGAGAAC	STREME-2	cds_PVP01_0004220.1	176	187	.	13.3	AAGAAGAAGAAG
2-AAGAAGGAGAAC	STREME-2	cds_PVP01_0004220.1	179	190	.	13.3	AAGAAGAAGAAG
2-AAGAAGGAGAAC	STREME-2	cds_PVP01_0004220.1	182	193	.	13.3	AAGAAGAAGAAG
2-AAGAAGGAGAAC	STREME-2	cds_PVP01_0945900.1	3158	3169	.	13.3	AAGAAGAAGAAG
2-AAGAAGGAGAAC	STREME-2	cds_PVP01_0945900.1	3161	3172	.	13.3	AAGAAGAAGAAG
2-AAGAAGGAGAAC	STREME-2	cds_PVP01_0109300.1	16	27	.	13.3	AAGAAGAAGAAG
2-AAGAAGGAGAAC	STREME-2	cds_PVP01_1033900.1	1694	1705	.	13.3	AAGAAGAAGAAG
2-AAGAAGGAGAAC	STREME-2	cds_PVP01_1033900.1	1697	1708	.	13.3	AAGAAGAAGAAG
2-AAGAAGGAGAAC	STREME-2	cds_PVP01_1033900.1	1700	1711	.	13.3	AAGAAGAAGAAG
2-AAGAAGGAGAAC	STREME-2	cds_PVP01_1033900.1	1703	1714	.	13.3	AAGAAGAAGAAG
2-AAGAAGGAGAAC	STREME-2	cds_PVP01_1033900.1	1706	1717	.	13.3	AAGAAGAAGAAG
2-AAGAAGGAGAAC	STREME-2	cds_PVP01_1033900.1	1709	1720	.	13.3	AAGAAGAAGAAG
2-AAGAAGGAGAAC	STREME-2	cds_PVP01_1033900.1	1712	1723	.	13.3	AAGAAGAAGAAG
2-AAGAAGGAGAAC	STREME-2	cds_PVP01_1033900.1	1715	1726	.	13.3	AAGAAGAAGAAG
2-AAGAAGGAGAAC	STREME-2	cds_PVP01_1033900.1	1718	1729	.	13.3	AAGAAGAAGAAG
2-AAGAAGGAGAAC	STREME-2	cds_PVP01_1033900.1	1733	1744	.	13.3	AAGAAGAAGAAG
2-AAGAAGGAGAAC	STREME-2	cds_PVP01_1033900.1	1736	1747	.	13.3	AAGAAGAAGAAG
2-AAGAAGGAGAAC	STREME-2	cds_PVP01_1033900.1	1739	1750	.	13.3	AAGAAGAAGAAG
2-AAGAAGGAGAAC	STREME-2	cds_PVP01_1033900.1	1742	1753	.	13.3	AAGAAGAAGAAG
2-AAGAAGGAGAAC	STREME-2	cds_PVP01_1033900.1	1745	1756	.	13.3	AAGAAGAAGAAG
2-AAGAAGGAGAAC	STREME-2	cds_PVP01_1033900.1	1748	1759	.	13.3	AAGAAGAAGAAG
2-AAGAAGGAGAAC	STREME-2	cds_PVP01_1033900.1	1751	1762	.	13.3	AAGAAGAAGAAG
2-AAGAAGGAGAAC	STREME-2	cds_PVP01_1033900.1	1754	1765	.	13.3	AAGAAGAAGAAG
2-AAGAAGGAGAAC	STREME-2	cds_PVP01_1033900.1	1757	1768	.	13.3	AAGAAGAAGAAG
2-AAGAAGGAGAAC	STREME-2	cds_PVP01_0117700.1	3748	3759	.	13.3	AAGAAGAAGAAG
2-AAGAAGGAGAAC	STREME-2	cds_PVP01_0117700.1	3751	3762	.	13.3	AAGAAGAAGAAG
2-AAGAAGGAGAAC	STREME-2	cds_PVP01_1439100.1	153	164	.	13.3	AAGAAGAAGAAG
2-AAGAAGGAGAAC	STREME-2	cds_PVP01_1203800.1	1123	1134	.	13.3	AAGAAGAAGAAG
2-AAGAAGGAGAAC	STREME-2	cds_PVP01_1203800.1	1126	1137	.	13.3	AAGAAGAAGAAG
2-AAGAAGGAGAAC	STREME-2	cds_PVP01_1203800.1	1129	1140	.	13.3	AAGAAGAAGAAG
2-AAGAAGGAGAAC	STREME-2	cds_PVP01_1146300.1	2524	2535	.	13.3	AAGAAGAAGAAG
2-AAGAAGGAGAAC	STREME-2	cds_PVP01_0104800.1	1303	1314	.	13.3	AAGAAGAAGAAG
2-AAGAAGGAGAAC	STREME-2	cds_PVP01_0104800.1	9853	9864	.	13.3	AAGAAGAAGAAG
2-AAGAAGGAGAAC	STREME-2	cds_PVP01_0104800.1	9856	9867	.	13.3	AAGAAGAAGAAG
2-AAGAAGGAGAAC	STREME-2	cds_PVP01_0104800.1	9859	9870	.	13.3	AAGAAGAAGAAG
2-AAGAAGGAGAAC	STREME-2	cds_PVP01_0104800.1	9862	9873	.	13.3	AAGAAGAAGAAG
2-AAGAAGGAGAAC	STREME-2	cds_PVP01_0300700.1	473	484	.	13.3	AAGAAGAAGAAG
2-AAGAAGGAGAAC	STREME-2	cds_PVP01_1402100.1	806	817	.	13.3	AAGAAGAAGAAG
2-AAGAAGGAGAAC	STREME-2	cds_PVP01_1025100.1	7181	7192	.	13.3	AAGAAGAAGAAG
2-AAGAAGGAGAAC	STREME-2	cds_PVP01_1025100.1	7184	7195	.	13.3	AAGAAGAAGAAG
2-AAGAAGGAGAAC	STREME-2	cds_PVP01_0924600.1	1378	1389	.	13.3	AAGAAGAAGAAG
2-AAGAAGGAGAAC	STREME-2	cds_PVP01_0924600.1	1381	1392	.	13.3	AAGAAGAAGAAG
2-AAGAAGGAGAAC	STREME-2	cds_PVP01_0803200.1	1615	1626	.	13.3	AAGAAGAAGAAG
2-AAGAAGGAGAAC	STREME-2	cds_PVP01_0803200.1	1618	1629	.	13.3	AAGAAGAAGAAG
2-AAGAAGGAGAAC	STREME-2	cds_PVP01_0803200.1	1621	1632	.	13.3	AAGAAGAAGAAG
2-AAGAAGGAGAAC	STREME-2	cds_PVP01_0803200.1	1624	1635	.	13.3	AAGAAGAAGAAG
2-AAGAAGGAGAAC	STREME-2	cds_PVP01_1310500.1	3200	3211	.	13.3	AAGAAGAAGAAG
2-AAGAAGGAGAAC	STREME-2	cds_PVP01_0519500.1	691	702	.	13.3	AAGAAGAAGAAG
2-AAGAAGGAGAAC	STREME-2	cds_PVP01_1219600.1	401	412	.	13.3	AAGAAGAAGAAG
2-AAGAAGGAGAAC	STREME-2	cds_PVP01_0606900.1	6707	6718	.	13.3	AAGAAGAAGAAG
2-AAGAAGGAGAAC	STREME-2	cds_PVP01_0606900.1	9110	9121	.	13.3	AAGAAGAAGAAG
2-AAGAAGGAGAAC	STREME-2	cds_PVP01_0606900.1	9113	9124	.	13.3	AAGAAGAAGAAG
2-AAGAAGGAGAAC	STREME-2	cds_PVP01_0606900.1	12609	12620	.	13.3	AAGAAGAAGAAG
2-AAGAAGGAGAAC	STREME-2	cds_PVP01_0606900.1	12612	12623	.	13.3	AAGAAGAAGAAG
2-AAGAAGGAGAAC	STREME-2	cds_PVP01_0105500.1	1526	1537	.	13.3	AAGAAGAAGAAG
2-AAGAAGGAGAAC	STREME-2	cds_PVP01_0204500.1	4102	4113	.	13.3	AAGAAGAAGAAG
2-AAGAAGGAGAAC	STREME-2	cds_PVP01_1321100.1	1270	1281	.	13.3	AAGAAGAAGAAG
2-AAGAAGGAGAAC	STREME-2	cds_PVP01_1469500.1	58	69	.	13.3	AAGAAGAAGAAG
2-AAGAAGGAGAAC	STREME-2	cds_PVP01_1469500.1	61	72	.	13.3	AAGAAGAAGAAG
2-AAGAAGGAGAAC	STREME-2	cds_PVP01_1469500.1	64	75	.	13.3	AAGAAGAAGAAG
2-AAGAAGGAGAAC	STREME-2	cds_PVP01_1469500.1	67	78	.	13.3	AAGAAGAAGAAG
2-AAGAAGGAGAAC	STREME-2	cds_PVP01_1469500.1	70	81	.	13.3	AAGAAGAAGAAG
2-AAGAAGGAGAAC	STREME-2	cds_PVP01_1469500.1	73	84	.	13.3	AAGAAGAAGAAG
2-AAGAAGGAGAAC	STREME-2	cds_PVP01_1469500.1	76	87	.	13.3	AAGAAGAAGAAG
2-AAGAAGGAGAAC	STREME-2	cds_PVP01_1469500.1	79	90	.	13.3	AAGAAGAAGAAG
2-AAGAAGGAGAAC	STREME-2	cds_PVP01_1469500.1	148	159	.	13.3	AAGAAGAAGAAG
2-AAGAAGGAGAAC	STREME-2	cds_PVP01_1469500.1	151	162	.	13.3	AAGAAGAAGAAG
2-AAGAAGGAGAAC	STREME-2	cds_PVP01_1469500.1	154	165	.	13.3	AAGAAGAAGAAG
2-AAGAAGGAGAAC	STREME-2	cds_PVP01_1447400.1	1774	1785	.	13.3	AAGAAGAAGAAG
2-AAGAAGGAGAAC	STREME-2	cds_PVP01_1447400.1	1777	1788	.	13.3	AAGAAGAAGAAG
2-AAGAAGGAGAAC	STREME-2	cds_PVP01_1447400.1	1780	1791	.	13.3	AAGAAGAAGAAG
2-AAGAAGGAGAAC	STREME-2	cds_PVP01_1447400.1	1783	1794	.	13.3	AAGAAGAAGAAG
2-AAGAAGGAGAAC	STREME-2	cds_PVP01_1447400.1	1786	1797	.	13.3	AAGAAGAAGAAG
2-AAGAAGGAGAAC	STREME-2	cds_PVP01_0823900.1	5236	5247	.	13.3	AAGAAGAAGAAG
2-AAGAAGGAGAAC	STREME-2	cds_PVP01_0948800.1	797	808	.	13.3	AAGAAGAAGAAG
2-AAGAAGGAGAAC	STREME-2	cds_PVP01_0923700.1	4024	4035	.	13.3	AAGAAGAAGAAG
2-AAGAAGGAGAAC	STREME-2	cds_PVP01_0923700.1	4027	4038	.	13.3	AAGAAGAAGAAG
2-AAGAAGGAGAAC	STREME-2	cds_PVP01_0924100.1	2659	2670	.	13.3	AAGAAGAAGAAG
2-AAGAAGGAGAAC	STREME-2	cds_PVP01_1419600.1	2320	2331	.	13.3	AAGAAGAAGAAG
2-AAGAAGGAGAAC	STREME-2	cds_PVP01_0423000.1	722	733	.	13.3	AAGAAGAAGAAG
2-AAGAAGGAGAAC	STREME-2	cds_PVP01_0106500.1	163	174	.	13.3	AAGAAGAAGAAG
2-AAGAAGGAGAAC	STREME-2	cds_PVP01_0106500.1	166	177	.	13.3	AAGAAGAAGAAG
2-AAGAAGGAGAAC	STREME-2	cds_PVP01_0928600.1	196	207	.	13.3	AAGAAGAAGAAG
2-AAGAAGGAGAAC	STREME-2	cds_PVP01_0928600.1	199	210	.	13.3	AAGAAGAAGAAG
2-AAGAAGGAGAAC	STREME-2	cds_PVP01_0320400.1	1877	1888	.	13.3	AAGAAGAAGAAG
2-AAGAAGGAGAAC	STREME-2	cds_PVP01_0817100.1	2383	2394	.	13.3	AAGAAGAAGAAG
2-AAGAAGGAGAAC	STREME-2	cds_PVP01_1027200.1	663	674	.	13.3	AAGAAGAAGAAG
2-AAGAAGGAGAAC	STREME-2	cds_PVP01_1260700.1	934	945	.	13.3	AAGAAGAAGAAG
2-AAGAAGGAGAAC	STREME-2	cds_PVP01_1131900.1	132	143	.	13.3	AAGAAGAAGAAG
2-AAGAAGGAGAAC	STREME-2	cds_PVP01_1445600.1	157	168	.	13.3	AAGAAGAAGAAG
2-AAGAAGGAGAAC	STREME-2	cds_PVP01_1441600.1	2881	2892	.	13.3	AAGAAGAAGAAG
2-AAGAAGGAGAAC	STREME-2	cds_PVP01_1441600.1	3967	3978	.	13.3	AAGAAGAAGAAG
2-AAGAAGGAGAAC	STREME-2	cds_PVP01_1313500.1	544	555	.	13.3	AAGAAGAAGAAG
2-AAGAAGGAGAAC	STREME-2	cds_PVP01_1438600.1	3417	3428	.	13.3	AAGAAGAAGAAG
2-AAGAAGGAGAAC	STREME-2	cds_PVP01_0711600.1	394	405	.	13.3	AAGAAGAAGAAG
2-AAGAAGGAGAAC	STREME-2	cds_PVP01_1130500.1	1846	1857	.	13.3	AAGAAGAAGAAG
2-AAGAAGGAGAAC	STREME-2	cds_PVP01_0807800.1	2893	2904	.	13.3	AAGAAGAAGAAG
2-AAGAAGGAGAAC	STREME-2	cds_PVP01_0807800.1	2896	2907	.	13.3	AAGAAGAAGAAG
2-AAGAAGGAGAAC	STREME-2	cds_PVP01_1449600.1	2568	2579	.	13.3	AAGAAGAAGAAG
2-AAGAAGGAGAAC	STREME-2	cds_PVP01_0728900.1	4294	4305	.	13.3	AAGAAGAAGAAG
2-AAGAAGGAGAAC	STREME-2	cds_PVP01_1024200.1	3355	3366	.	13.3	AAGAAGAAGAAG
2-AAGAAGGAGAAC	STREME-2	cds_PVP01_0415700.1	880	891	.	13.3	AAGAAGAAGAAG
2-AAGAAGGAGAAC	STREME-2	cds_PVP01_0415700.1	883	894	.	13.3	AAGAAGAAGAAG
2-AAGAAGGAGAAC	STREME-2	cds_PVP01_0415700.1	886	897	.	13.3	AAGAAGAAGAAG
2-AAGAAGGAGAAC	STREME-2	cds_PVP01_0415700.1	889	900	.	13.3	AAGAAGAAGAAG
2-AAGAAGGAGAAC	STREME-2	cds_PVP01_0516600.1	133	144	.	13.3	AAGAAGAAGAAG
2-AAGAAGGAGAAC	STREME-2	cds_PVP01_0915900.1	340	351	.	13.3	AAGAAGAAGAAG
2-AAGAAGGAGAAC	STREME-2	cds_PVP01_0915900.1	343	354	.	13.3	AAGAAGAAGAAG
2-AAGAAGGAGAAC	STREME-2	cds_PVP01_0915900.1	346	357	.	13.3	AAGAAGAAGAAG
2-AAGAAGGAGAAC	STREME-2	cds_PVP01_1144400.1	195	206	.	13.3	AAGAAGAAGAAG
2-AAGAAGGAGAAC	STREME-2	cds_PVP01_1144400.1	2874	2885	.	13.3	AAGAAGAAGAAG
2-AAGAAGGAGAAC	STREME-2	cds_PVP01_1144400.1	2877	2888	.	13.3	AAGAAGAAGAAG
2-AAGAAGGAGAAC	STREME-2	cds_PVP01_1313200.1	1483	1494	.	13.3	AAGAAGAAGAAG
2-AAGAAGGAGAAC	STREME-2	cds_PVP01_0418200.1	3156	3167	.	13.3	AAGAAGAAGAAG
2-AAGAAGGAGAAC	STREME-2	cds_PVP01_0610000.1	994	1005	.	13.3	AAGAAGAAGAAG
2-AAGAAGGAGAAC	STREME-2	cds_PVP01_0212200.1	6253	6264	.	13.3	AAGAAGAAGAAG
2-AAGAAGGAGAAC	STREME-2	cds_PVP01_1014400.1	6988	6999	.	13.3	AAGAAGAAGAAG
2-AAGAAGGAGAAC	STREME-2	cds_PVP01_1014400.1	6991	7002	.	13.3	AAGAAGAAGAAG
2-AAGAAGGAGAAC	STREME-2	cds_PVP01_0118400.1	1613	1624	.	13.3	AAGAAGAAGAAG
2-AAGAAGGAGAAC	STREME-2	cds_PVP01_0729100.1	203	214	.	13.3	AAGAAGAAGAAG
2-AAGAAGGAGAAC	STREME-2	cds_PVP01_0118100.1	1816	1827	.	13.3	AAGAAGAAGAAG
2-AAGAAGGAGAAC	STREME-2	cds_PVP01_1255000.1	488	499	.	13.3	AAGAAGAAGAAG
2-AAGAAGGAGAAC	STREME-2	cds_PVP01_0317900.1	1657	1668	.	13.29	AAGAAGCCGGAC
2-AAGAAGGAGAAC	STREME-2	cds_PVP01_1260500.1	5884	5895	.	13.27	AAGAAGGACCAC
2-AAGAAGGAGAAC	STREME-2	cds_PVP01_0418200.1	3204	3215	.	13.27	AAGAAGGACCAC
2-AAGAAGGAGAAC	STREME-2	cds_PVP01_0509300.1	167	178	.	13.27	AAGAAGGACCAC
2-AAGAAGGAGAAC	STREME-2	cds_PVP01_0106700.1	2539	2550	.	13.26	AAGAGGGAGGAC
2-AAGAAGGAGAAC	STREME-2	cds_PVP01_1238900.1	2063	2074	.	13.26	AAGAGGGAGGAC
2-AAGAAGGAGAAC	STREME-2	cds_PVP01_1238900.1	2777	2788	.	13.26	AAGAGGGAGGAC
2-AAGAAGGAGAAC	STREME-2	cds_PVP01_1208400.1	8026	8037	.	13.26	AAGAGGGAGGAC
2-AAGAAGGAGAAC	STREME-2	cds_PVP01_1233400.1	802	813	.	13.26	AAGAGGGAGGAC
2-AAGAAGGAGAAC	STREME-2	cds_PVP01_0921700.1	731	742	.	13.26	AAGAGGGAGGAC
2-AAGAAGGAGAAC	STREME-2	cds_PVP01_1132000.1	2015	2026	.	13.26	AAGAGGGAGGAC
2-AAGAAGGAGAAC	STREME-2	cds_PVP01_1346500.1	862	873	.	13.25	AAGAAGAAUAAC
2-AAGAAGGAGAAC	STREME-2	cds_PVP01_0807400.1	1177	1188	.	13.25	AAGAAGAAUAAC
2-AAGAAGGAGAAC	STREME-2	cds_PVP01_0606900.1	10856	10867	.	13.25	AAGAAGGUGAGC
2-AAGAAGGAGAAC	STREME-2	cds_PVP01_0908600.1	2320	2331	.	13.25	AAGAAGGUGAGC
2-AAGAAGGAGAAC	STREME-2	cds_PVP01_1022200.1	217	228	.	13.25	AAGAAGGUGAGC
2-AAGAAGGAGAAC	STREME-2	cds_PVP01_1031400.1	1220	1231	.	13.24	AAGAAGCAGCAC
2-AAGAAGGAGAAC	STREME-2	cds_PVP01_1203100.1	366	377	.	13.24	AAGAAGCAGCAC
2-AAGAAGGAGAAC	STREME-2	cds_PVP01_0311300.1	4711	4722	.	13.23	AAGAAGAAGUAC
2-AAGAAGGAGAAC	STREME-2	cds_PVP01_0916700.1	4129	4140	.	13.23	AAGAAGAAGUAC
2-AAGAAGGAGAAC	STREME-2	cds_PVP01_1267700.1	3181	3192	.	13.23	AAGAAGAAGUAC
2-AAGAAGGAGAAC	STREME-2	cds_PVP01_1326400.1	1384	1395	.	13.23	AAGAAGAAGUAC
2-AAGAAGGAGAAC	STREME-2	cds_PVP01_0927400.1	1349	1360	.	13.23	AAGAAGAAGUAC
2-AAGAAGGAGAAC	STREME-2	cds_PVP01_0004280.1	569	580	.	13.21	CAGAAGAAGAAC
2-AAGAAGGAGAAC	STREME-2	cds_PVP01_1136900.1	4069	4080	.	13.21	CAGAAGAAGAAC
2-AAGAAGGAGAAC	STREME-2	cds_PVP01_1264300.1	188	199	.	13.21	CAGAAGAAGAAC
2-AAGAAGGAGAAC	STREME-2	cds_PVP01_1208400.1	9835	9846	.	13.21	CAGAAGAAGAAC
2-AAGAAGGAGAAC	STREME-2	cds_PVP01_0939800.1	732	743	.	13.21	CAGAAGAAGAAC
2-AAGAAGGAGAAC	STREME-2	cds_PVP01_0908600.1	1255	1266	.	13.21	CAGAAGAAGAAC
2-AAGAAGGAGAAC	STREME-2	cds_PVP01_0925500.1	3758	3769	.	13.2	AAGAAGGAGAGG
2-AAGAAGGAGAAC	STREME-2	cds_PVP01_1228700.1	5180	5191	.	13.2	AAGAAGGAGAGG
2-AAGAAGGAGAAC	STREME-2	cds_PVP01_1229200.1	6074	6085	.	13.2	AAGAAGGAGAGG
2-AAGAAGGAGAAC	STREME-2	cds_PVP01_1025500.1	3367	3378	.	13.2	AAGAAGGAGAGG
2-AAGAAGGAGAAC	STREME-2	cds_PVP01_1238700.1	6553	6564	.	13.2	AAGAAGGAGAGG
2-AAGAAGGAGAAC	STREME-2	cds_PVP01_0606900.1	11937	11948	.	13.2	AAGAAGGAGAGG
2-AAGAAGGAGAAC	STREME-2	cds_PVP01_1135500.1	2562	2573	.	13.2	AAGAAGGAGAGG
2-AAGAAGGAGAAC	STREME-2	cds_PVP01_1320900.1	5961	5972	.	13.2	AAGAAGGAGAGG
2-AAGAAGGAGAAC	STREME-2	cds_PVP01_0210400.1	5742	5753	.	13.2	AAGAAGGAGAGG
2-AAGAAGGAGAAC	STREME-2	cds_PVP01_0517700.1	1999	2010	.	13.2	AAGAAGGAGAGG
2-AAGAAGGAGAAC	STREME-2	cds_PVP01_0405000.1	6761	6772	.	13.2	AAGAAGGAGAGG
2-AAGAAGGAGAAC	STREME-2	cds_PVP01_1025100.1	2776	2787	.	13.18	AAGAGGGACAAC
2-AAGAAGGAGAAC	STREME-2	cds_PVP01_1457000.1	1501	1512	.	13.16	AAGAAGAAGAGC
2-AAGAAGGAGAAC	STREME-2	cds_PVP01_1022500.1	26608	26619	.	13.16	AAGAAGAAGAGC
2-AAGAAGGAGAAC	STREME-2	cds_PVP01_0117700.1	3754	3765	.	13.16	AAGAAGAAGAGC
2-AAGAAGGAGAAC	STREME-2	cds_PVP01_1025100.1	1228	1239	.	13.16	AAGAAGAAGAGC
2-AAGAAGGAGAAC	STREME-2	cds_PVP01_0921700.1	56	67	.	13.16	AAGAAGAAGAGC
2-AAGAAGGAGAAC	STREME-2	cds_PVP01_0604700.1	1919	1930	.	13.16	AAGAAGAAGAGC
2-AAGAAGGAGAAC	STREME-2	cds_PVP01_1027200.1	444	455	.	13.16	AAGAAGAAGAGC
2-AAGAAGGAGAAC	STREME-2	cds_PVP01_0611800.1	3943	3954	.	13.16	AAGAAGAAGAGC
2-AAGAAGGAGAAC	STREME-2	cds_PVP01_1340300.1	11191	11202	.	13.16	AAGAAGAAGAGC
2-AAGAAGGAGAAC	STREME-2	cds_PVP01_0522700.1	121	132	.	13.16	AAGAAGAAGAGC
2-AAGAAGGAGAAC	STREME-2	cds_PVP01_0701100.1	2259	2270	.	13.16	AAGAAGAAGAGC
2-AAGAAGGAGAAC	STREME-2	cds_PVP01_0509300.1	1265	1276	.	13.16	AAGAAGAAGAGC
2-AAGAAGGAGAAC	STREME-2	cds_PVP01_0114800.1	1741	1752	.	13.16	AAGAAGAAGAGC
2-AAGAAGGAGAAC	STREME-2	cds_PVP01_0719100.1	460	471	.	13.16	AAGAAGGCGUAC
2-AAGAAGGAGAAC	STREME-2	cds_PVP01_0615000.1	3508	3519	.	13.16	AAGAAGGCGUAC
2-AAGAAGGAGAAC	STREME-2	cds_PVP01_0609100.1	4759	4770	.	13.15	AAGAAGUAUAAC
2-AAGAAGGAGAAC	STREME-2	cds_PVP01_1301900.1	1024	1035	.	13.15	AAGAAGUAUAAC
2-AAGAAGGAGAAC	STREME-2	cds_PVP01_1313900.1	3289	3300	.	13.15	AAGAAGUAUAAC
2-AAGAAGGAGAAC	STREME-2	cds_PVP01_1121400.1	12151	12162	.	13.15	AAGAAGGAGUUC
2-AAGAAGGAGAAC	STREME-2	cds_PVP01_0822900.1	3916	3927	.	13.15	AAGAAGGAGUUC
2-AAGAAGGAGAAC	STREME-2	cds_PVP01_1024200.1	3134	3145	.	13.08	AAGAAGCAGGUC
2-AAGAAGGAGAAC	STREME-2	cds_PVP01_0922200.1	112	123	.	13.07	AAGAAGAGGAAC
2-AAGAAGGAGAAC	STREME-2	cds_PVP01_0520500.1	621	632	.	13.07	AAGAAGAGGAAC
2-AAGAAGGAGAAC	STREME-2	cds_PVP01_0707900.1	2569	2580	.	13.07	AAGAAGAGGAAC
2-AAGAAGGAGAAC	STREME-2	cds_PVP01_1211000.1	11068	11079	.	13.07	AAGAAGAGGAAC
2-AAGAAGGAGAAC	STREME-2	cds_PVP01_0207400.1	2194	2205	.	13.07	AAGAAGAGGAAC
2-AAGAAGGAGAAC	STREME-2	cds_PVP01_1315100.1	724	735	.	13.07	AAGAAGAGGAAC
2-AAGAAGGAGAAC	STREME-2	cds_PVP01_0611800.1	2870	2881	.	13.07	AAGAAGAGGAAC
2-AAGAAGGAGAAC	STREME-2	cds_PVP01_0210400.1	3001	3012	.	13.07	AAGAAGAGGAAC
2-AAGAAGGAGAAC	STREME-2	cds_PVP01_1008600.1	3635	3646	.	13.07	AAGAAGAGGAAC
2-AAGAAGGAGAAC	STREME-2	cds_PVP01_0928700.1	5671	5682	.	13	CAGAAGGAGAAG
2-AAGAAGGAGAAC	STREME-2	cds_PVP01_0707000.1	1033	1044	.	13	CAGAAGGAGAAG
2-AAGAAGGAGAAC	STREME-2	cds_PVP01_1203800.1	1532	1543	.	13	CAGAAGGAGAAG
2-AAGAAGGAGAAC	STREME-2	cds_PVP01_1428700.1	2218	2229	.	13	CAGAAGGAGAAG
2-AAGAAGGAGAAC	STREME-2	cds_PVP01_0920600.1	1315	1326	.	13	CAGAAGGAGAAG
2-AAGAAGGAGAAC	STREME-2	cds_PVP01_1343100.1	805	816	.	13	CAGAAGGAGAAG
2-AAGAAGGAGAAC	STREME-2	cds_PVP01_0210400.1	2950	2961	.	13	CAGAAGGAGAAG
2-AAGAAGGAGAAC	STREME-2	cds_PVP01_1340300.1	11341	11352	.	13	CAGAAGGAGAAG
2-AAGAAGGAGAAC	STREME-2	cds_PVP01_0835000.1	2161	2172	.	13	CAGAAGGAGAAG
2-AAGAAGGAGAAC	STREME-2	cds_PVP01_1205300.1	6202	6213	.	13	CAGAAGGAGAAG
2-AAGAAGGAGAAC	STREME-2	cds_PVP01_1130500.1	2917	2928	.	13	CAGAAGGAGAAG
2-AAGAAGGAGAAC	STREME-2	cds_PVP01_0724600.1	4306	4317	.	13	CAGAAGGAGAAG
2-AAGAAGGAGAAC	STREME-2	cds_PVP01_1313900.1	3268	3279	.	13	CAGAAGGAGAAG
2-AAGAAGGAGAAC	STREME-2	cds_PVP01_1112300.1	4369	4380	.	12.95	AAGAAGGAGUCC
2-AAGAAGGAGAAC	STREME-2	cds_PVP01_0709600.1	2344	2355	.	12.95	AAGAAGGAGUCC
2-AAGAAGGAGAAC	STREME-2	cds_PVP01_0317900.1	1279	1290	.	12.93	CAGAAGGAGUAC
2-AAGAAGGAGAAC	STREME-2	cds_PVP01_1266900.1	2179	2190	.	12.93	CAGAAGGAGUAC
2-AAGAAGGAGAAC	STREME-2	cds_PVP01_1460800.1	373	384	.	12.93	CAGAAGGAGUAC
2-AAGAAGGAGAAC	STREME-2	cds_PVP01_1334400.1	3280	3291	.	12.9	AAUAAGAAGAAC
2-AAGAAGGAGAAC	STREME-2	cds_PVP01_0423300.1	49	60	.	12.9	AAUAAGAAGAAC
2-AAGAAGGAGAAC	STREME-2	cds_PVP01_1263600.1	1477	1488	.	12.9	AAUAAGAAGAAC
2-AAGAAGGAGAAC	STREME-2	cds_PVP01_0308400.1	454	465	.	12.89	AAGAAGGCCGAC
2-AAGAAGGAGAAC	STREME-2	cds_PVP01_1144400.1	72	83	.	12.89	AAGAAGGCCGAC
2-AAGAAGGAGAAC	STREME-2	cds_PVP01_0204500.1	1946	1957	.	12.86	CAGAAGGAGAGC
2-AAGAAGGAGAAC	STREME-2	cds_PVP01_1141300.1	3655	3666	.	12.86	CAGAAGGAGAGC
2-AAGAAGGAGAAC	STREME-2	cds_PVP01_0829800.1	1700	1711	.	12.84	AAGAAGGGGACC
2-AAGAAGGAGAAC	STREME-2	cds_PVP01_1116400.1	380	391	.	12.84	AAGAAGGGGACC
2-AAGAAGGAGAAC	STREME-2	cds_PVP01_1011800.1	691	702	.	12.84	AAGAAGGGGACC
2-AAGAAGGAGAAC	STREME-2	cds_PVP01_1208400.1	13276	13287	.	12.84	AAGAAGGGGACC
2-AAGAAGGAGAAC	STREME-2	cds_PVP01_0928700.1	785	796	.	12.79	AAGAAGGAGGAU
2-AAGAAGGAGAAC	STREME-2	cds_PVP01_0315300.1	454	465	.	12.79	AAGAAGGAGGAU
2-AAGAAGGAGAAC	STREME-2	cds_PVP01_1135200.1	2129	2140	.	12.79	AAGAAGGAGGAU
2-AAGAAGGAGAAC	STREME-2	cds_PVP01_1311100.1	2107	2118	.	12.79	AAGAAGGAGGAU
2-AAGAAGGAGAAC	STREME-2	cds_PVP01_0945900.1	4196	4207	.	12.79	AAGAGGGCGAAC
2-AAGAAGGAGAAC	STREME-2	cds_PVP01_1031600.1	347	358	.	12.75	AAGAAGGAGCAG
2-AAGAAGGAGAAC	STREME-2	cds_PVP01_0612400.1	1084	1095	.	12.75	AAGAAGGAGCAG
2-AAGAAGGAGAAC	STREME-2	cds_PVP01_0010200.1	794	805	.	12.75	AAGAAGGAGCAG
2-AAGAAGGAGAAC	STREME-2	cds_PVP01_1216000.1	242	253	.	12.75	AAGAAGGAGCAG
2-AAGAAGGAGAAC	STREME-2	cds_PVP01_1110800.1	3643	3654	.	12.75	AAGAAGGAGCAG
2-AAGAAGGAGAAC	STREME-2	cds_PVP01_0703000.1	4198	4209	.	12.75	AAGAAGGAGCAG
2-AAGAAGGAGAAC	STREME-2	cds_PVP01_1029200.1	404	415	.	12.75	AAGAAGGAGCAG
2-AAGAAGGAGAAC	STREME-2	cds_PVP01_1432900.1	316	327	.	12.75	AAGAAGGAGCAG
2-AAGAAGGAGAAC	STREME-2	cds_PVP01_0208000.1	60	71	.	12.75	AAGAAGGAGCAG
2-AAGAAGGAGAAC	STREME-2	cds_PVP01_1306100.1	3403	3414	.	12.75	AAGAAGGAGCAG
2-AAGAAGGAGAAC	STREME-2	cds_PVP01_0511400.1	2068	2079	.	12.75	AAGAAGGAGCAG
2-AAGAAGGAGAAC	STREME-2	cds_PVP01_1002900.1	6698	6709	.	12.75	AAGAAGGAGCAG
2-AAGAAGGAGAAC	STREME-2	cds_PVP01_0915600.1	6109	6120	.	12.74	AAGAGGGAUAAC
2-AAGAAGGAGAAC	STREME-2	cds_PVP01_1211000.1	3295	3306	.	12.74	AAGAGGGAUAAC
2-AAGAAGGAGAAC	STREME-2	cds_PVP01_1135200.1	5239	5250	.	12.73	AAGAAGUGGAAC
2-AAGAAGGAGAAC	STREME-2	cds_PVP01_1110900.1	1085	1096	.	12.73	AAGAAGUGGAAC
2-AAGAAGGAGAAC	STREME-2	cds_PVP01_1143000.1	321	332	.	12.73	AAGAAGUGGAAC
2-AAGAAGGAGAAC	STREME-2	cds_PVP01_0311300.1	1010	1021	.	12.72	AAGAAGGAGCUC
2-AAGAAGGAGAAC	STREME-2	cds_PVP01_0928700.1	6028	6039	.	12.72	AAGAAGGAGCUC
2-AAGAAGGAGAAC	STREME-2	cds_PVP01_0520500.1	26	37	.	12.72	AAGAAGGAGCUC
2-AAGAAGGAGAAC	STREME-2	cds_PVP01_1452700.1	1528	1539	.	12.72	AAGAAGGAGCUC
2-AAGAAGGAGAAC	STREME-2	cds_PVP01_1011500.1	8000	8011	.	12.72	AAGAAGGAGCUC
2-AAGAAGGAGAAC	STREME-2	cds_PVP01_0417900.1	1072	1083	.	12.72	AAGAAGGAGCUC
2-AAGAAGGAGAAC	STREME-2	cds_PVP01_1105700.1	3934	3945	.	12.72	AAGAAGGAGCUC
2-AAGAAGGAGAAC	STREME-2	cds_PVP01_0807700.1	4096	4107	.	12.72	AAGAAGGAGCUC
2-AAGAAGGAGAAC	STREME-2	cds_PVP01_0920000.1	1753	1764	.	12.72	AAGAAGGAGCUC
2-AAGAAGGAGAAC	STREME-2	cds_PVP01_1319600.1	1817	1828	.	12.72	AAGAAGGAGCUC
2-AAGAAGGAGAAC	STREME-2	cds_PVP01_0620800.1	140	151	.	12.72	AAGAGGGAGACC
2-AAGAAGGAGAAC	STREME-2	cds_PVP01_0707000.1	850	861	.	12.72	AAGAGGGAGACC
2-AAGAAGGAGAAC	STREME-2	cds_PVP01_1208400.1	2077	2088	.	12.72	AAGAGGGAGACC
2-AAGAAGGAGAAC	STREME-2	cds_PVP01_1131800.1	64	75	.	12.72	AAGAGGGAGACC
2-AAGAAGGAGAAC	STREME-2	cds_PVP01_0417200.1	985	996	.	12.71	AAGAAGGAAAAC
2-AAGAAGGAGAAC	STREME-2	cds_PVP01_0305300.1	432	443	.	12.71	AAGAAGGAAAAC
2-AAGAAGGAGAAC	STREME-2	cds_PVP01_0610200.1	1563	1574	.	12.71	AAGAAGGAAAAC
2-AAGAAGGAGAAC	STREME-2	cds_PVP01_0607100.1	3745	3756	.	12.71	AAGAAGGAAAAC
2-AAGAAGGAGAAC	STREME-2	cds_PVP01_1011500.1	15684	15695	.	12.71	AAGAAGGAAAAC
2-AAGAAGGAGAAC	STREME-2	cds_PVP01_1404700.1	5428	5439	.	12.71	AAGAAGGAAAAC
2-AAGAAGGAGAAC	STREME-2	cds_PVP01_1228300.1	1288	1299	.	12.71	AAGAAGGAAAAC
2-AAGAAGGAGAAC	STREME-2	cds_PVP01_0916100.1	319	330	.	12.71	AAGAAGGAAAAC
2-AAGAAGGAGAAC	STREME-2	cds_PVP01_1447000.1	5560	5571	.	12.71	AAGAAGGAAAAC
2-AAGAAGGAGAAC	STREME-2	cds_PVP01_0320400.1	7540	7551	.	12.71	AAGAAGGAAAAC
2-AAGAAGGAGAAC	STREME-2	cds_PVP01_1139300.1	873	884	.	12.68	AAUAAGGAGAAG
2-AAGAAGGAGAAC	STREME-2	cds_PVP01_0703700.1	7000	7011	.	12.68	AAUAAGGAGAAG
2-AAGAAGGAGAAC	STREME-2	cds_PVP01_0939800.1	3659	3670	.	12.68	AAUAAGGAGAAG
2-AAGAAGGAGAAC	STREME-2	cds_PVP01_1469200.1	647	658	.	12.68	AAGAAGCAGAAU
2-AAGAAGGAGAAC	STREME-2	cds_PVP01_0913800.1	10192	10203	.	12.68	AAGAAGCAGAAU
2-AAGAAGGAGAAC	STREME-2	cds_PVP01_0604200.1	2557	2568	.	12.68	AAGAAGCAGAAU
2-AAGAAGGAGAAC	STREME-2	cds_PVP01_1301900.1	2284	2295	.	12.68	AAGAAGCAGAAU
2-AAGAAGGAGAAC	STREME-2	cds_PVP01_1113900.1	6118	6129	.	12.68	AAGAAGCAGAAU
2-AAGAAGGAGAAC	STREME-2	cds_PVP01_1204300.1	1222	1233	.	12.65	AAGAAGGAUUAC
2-AAGAAGGAGAAC	STREME-2	cds_PVP01_1113900.1	172	183	.	12.64	AAGAGGGUGAAC
2-AAGAAGGAGAAC	STREME-2	cds_PVP01_1211000.1	3211	3222	.	12.59	AAGAAGGACAAU
2-AAGAAGGAGAAC	STREME-2	cds_PVP01_1003600.1	1990	2001	.	12.59	AAGAAGGACAAU
2-AAGAAGGAGAAC	STREME-2	cds_PVP01_0506600.1	503	514	.	12.55	AAGAGGAAGAAC
2-AAGAAGGAGAAC	STREME-2	cds_PVP01_0829900.1	2704	2715	.	12.55	AAGAGGAAGAAC
2-AAGAAGGAGAAC	STREME-2	cds_PVP01_1260500.1	19	30	.	12.55	AAGAGGAAGAAC
2-AAGAAGGAGAAC	STREME-2	cds_PVP01_1411200.1	130	141	.	12.55	AAGAGGAAGAAC
2-AAGAAGGAGAAC	STREME-2	cds_PVP01_1206200.1	1109	1120	.	12.55	AAGAGGAAGAAC
2-AAGAAGGAGAAC	STREME-2	cds_PVP01_0817100.1	3505	3516	.	12.55	AAGAGGAAGAAC
2-AAGAAGGAGAAC	STREME-2	cds_PVP01_0604800.1	1111	1122	.	12.55	AAGAGGAAGAAC
2-AAGAAGGAGAAC	STREME-2	cds_PVP01_1139900.1	2152	2163	.	12.55	AAGAGGAAGAAC
2-AAGAAGGAGAAC	STREME-2	cds_PVP01_1014400.1	1054	1065	.	12.55	AAGAGGAAGAAC
2-AAGAAGGAGAAC	STREME-2	cds_PVP01_0105700.1	5039	5050	.	12.55	AAUAAGGAGAGC
2-AAGAAGGAGAAC	STREME-2	cds_PVP01_1215100.1	4789	4800	.	12.55	AAUAAGGAGAGC
2-AAGAAGGAGAAC	STREME-2	cds_PVP01_0823900.1	2616	2627	.	12.55	AAUAAGGAGAGC
2-AAGAAGGAGAAC	STREME-2	cds_PVP01_1320900.1	434	445	.	12.52	AAGAAGGCGCAC
2-AAGAAGGAGAAC	STREME-2	cds_PVP01_0720600.1	1876	1887	.	12.52	AAGAAGGCGCAC
#
3-AGGAUGAGGAU	STREME-3	cds_PVP01_0213800.1	11165	11175	.	18.52	AGGAUGAGGAU
3-AGGAUGAGGAU	STREME-3	cds_PVP01_1107800.1	272	282	.	18.52	AGGAUGAGGAU
3-AGGAUGAGGAU	STREME-3	cds_PVP01_0004320.1	905	915	.	18.52	AGGAUGAGGAU
3-AGGAUGAGGAU	STREME-3	cds_PVP01_0423400.1	3962	3972	.	18.52	AGGAUGAGGAU
3-AGGAUGAGGAU	STREME-3	cds_PVP01_1238900.1	2484	2494	.	18.52	AGGAUGAGGAU
3-AGGAUGAGGAU	STREME-3	cds_PVP01_0104800.1	1175	1185	.	18.52	AGGAUGAGGAU
3-AGGAUGAGGAU	STREME-3	cds_PVP01_0708200.1	2666	2676	.	18.52	AGGAUGAGGAU
3-AGGAUGAGGAU	STREME-3	cds_PVP01_0105300.1	1889	1899	.	18.52	AGGAUGAGGAU
3-AGGAUGAGGAU	STREME-3	cds_PVP01_1301900.1	5699	5709	.	18.52	AGGAUGAGGAU
3-AGGAUGAGGAU	STREME-3	cds_PVP01_0316400.1	2048	2058	.	18.52	AGGAUGAGGAU
3-AGGAUGAGGAU	STREME-3	cds_PVP01_1017200.1	4324	4334	.	16.73	AGGAUGAUGAU
[truncated: 60,866 more rows]

## Sheet: Gural_transcripts_motifs
Gene	Annotation	log2FoldChange (Hyp/Mix)	padj	IESI_2 motif	IESI_1_motif
PVP01_0533700	Plasmodium exported protein (PHIST), unknown function	-11.7915	2.35173e-13		1
PVP01_0000200	tryptophan-rich protein	-11.7193	9.40189e-13
PVP01_1402700	Plasmodium exported protein, unknown function	-11.5294	2.04249e-12	1	1
PVP01_1401800	tryptophan-rich protein	-10.9134	3.34252e-12
PVP01_0010210	merozoite surface protein 3, putative	-10.8638	6.7571e-11
PVP01_0503800	Plasmodium exported protein (PHIST), unknown function	-10.1094	7.84717e-09		1
PVP01_0838300	Plasmodium exported protein, unknown function	-10.0844	3.09658e-08		1
PVP01_0423000	Plasmodium exported protein, unknown function	-10.069	1.82738e-09	1	1
PVP01_1400900	Plasmodium exported protein, unknown function	-10.0665	2.44328e-09		1
PVP01_0808700	Plasmodium exported protein (PHIST), unknown function	-10.004	4.13514e-10		1
PVP01_1470700	hypothetical protein	-9.93314	1.93906e-09	1	1
PVP01_0525100	Plasmodium exported protein (PHIST), unknown function	-9.85446	1.61761e-08
PVP01_0523800	Plasmodium exported protein (PHIST), unknown function	-9.84634	1.84999e-08		1
PVP01_1271500	lysophospholipase, putative	-9.80282	1.23981e-08	1	1
PVP01_0000100	tryptophan-rich protein	-9.80177	2.90294e-22		1
PVP01_1401900	lysophospholipase, putative	-9.7078	4.55198e-09		1
PVP01_0523900	Plasmodium exported protein (PHIST), unknown function	-9.66756	3.15324e-09	1
PVP01_0102300	duffy binding protein 2	-9.62718	1.83717e-24		1
PVP01_1034000	Plasmodium exported protein (PHIST), unknown function	-9.60856	3.854e-08	1	1
PVP01_0838100	Plasmodium exported protein, unknown function	-9.60551	4.68943e-08		1
PVP01_0422600	early transcribed membrane protein	-9.58869	2.66682e-35	1	1
PVP01_0522900	Plasmodium exported protein (PHIST), unknown function, pseudogene	-9.53207	1.6846e-07		1
PVP01_0523200	Plasmodium exported protein (PHIST), unknown function	-9.51066	6.95257e-08		1
PVP01_1402800	Plasmodium exported protein, unknown function	-9.49423	2.76196e-07		1
PVP01_0201500	PIR protein	-9.3893	5.88232e-07	1
PVP01_1400600	Plasmodium exported protein, unknown function, pseudogene	-9.23079	2.79456e-07
PVP01_1401700	Plasmodium exported protein, unknown function	-9.21291	4.79886e-07		1
PVP01_1101700	conserved Plasmodium protein, unknown function	-9.17534	4.25491e-07		1
PVP01_0321100	conserved Plasmodium protein, unknown function	-9.16111	6.46888e-08		1
PVP01_1147500	Plasmodium exported protein, unknown function	-9.10873	1.1474e-13	1	1
PVP01_0201800	PIR protein	-9.08896	7.65571e-07		1
PVP01_0516100	Plasmodium exported protein (PHIST), unknown function	-9.05506	1.07072e-14		1
PVP01_1402600	conserved Plasmodium protein, unknown function	-9.03744	1.19877e-06		1
PVP01_0516000	Plasmodium exported protein (PHIST), unknown function	-9.02578	1.51744e-06		1
PVP01_1031700	merozoite surface protein 3	-9.0193	2.02113e-13		1
PVP01_0000140	tryptophan-rich protein	-9.01207	1.11419e-06		1
PVP01_0003380	PIR protein	-8.98622	9.53784e-07		1
PVP01_1469700	Plasmodium exported protein, unknown function	-8.92204	1.99408e-09	1	1
PVP01_1471900	Plasmodium exported protein (PHIST), unknown function	-8.85573	3.10304e-06	1	1
PVP01_0532900	tryptophan-rich protein	-8.82321	1.00636e-05	1	1
PVP01_1471100	PIR protein	-8.77647	3.66478e-06		1
PVP01_1449500	conserved Plasmodium protein, unknown function	-8.77146	8.07984e-06		1
PVP01_1201500	Plasmodium exported protein (PHIST), unknown function	-8.75875	4.05235e-13		1
PVP01_1033400	rhoptry-associated protein 2	-8.70865	7.12768e-52
PVP01_0001440	Plasmodium exported protein (PHIST), unknown function	-8.69514	6.22364e-40
PVP01_1469600	PIR protein	-8.64853	5.79691e-06	1	1
PVP01_0620700	hypothetical protein	-8.63112	1.98862e-11		1
PVP01_1470000	Plasmodium exported protein, unknown function	-8.62237	6.797e-06		1
PVP01_0534400	reticulocyte binding protein 2 precursor (PvRBP- 2), putative	-8.57516	1.61566e-15	1	1
PVP01_0010990	Plasmodium exported protein, unknown function	-8.56898	4.28512e-06		1
PVP01_1034200	Plasmodium exported protein, unknown function	-8.52466	1.0957e-05		1
PVP01_1401000	Plasmodium exported protein, unknown function	-8.5223	7.56088e-07	1	1
PVP01_0620500	conserved Plasmodium protein, unknown function	-8.47851	5.49716e-33
PVP01_0217100	Plasmodium exported protein, unknown function	-8.45668	1.51251e-05		1
PVP01_0302100	Plasmodium exported protein (PHIST), unknown function	-8.45446	2.5327e-12
PVP01_0532700	tryptophan-rich protein	-8.44931	3.33416e-05		1
PVP01_0524300	Plasmodium exported protein (PHIST), unknown function	-8.42894	1.11736e-06		1
PVP01_1401100	Plasmodium exported protein, unknown function	-8.40406	2.01564e-06		1
PVP01_1401300	Plasmodium exported protein, unknown function	-8.40338	7.30997e-25		1
PVP01_0623900	ring-exported protein 4, putative	-8.38145	2.41109e-05		1
PVP01_0700400	Plasmodium exported protein, unknown function	-8.34824	4.97656e-05		1
PVP01_0503700	tryptophan-rich protein	-8.34504	4.44601e-06	1
PVP01_0423300	hypothetical protein	-8.33257	2.67553e-60	1
PVP01_1220200	MSP7-like protein	-8.30887	3.59667e-11		1
PVP01_0936200	conserved Plasmodium protein, unknown function	-8.3077	2.26148e-11
PVP01_1147400	Plasmodium exported protein, unknown function	-8.28139	6.62958e-05
PVP01_1201800	tryptophan-rich protein	-8.27531	3.82771e-05		1
PVP01_0504000	Plasmodium exported protein (PHIST), unknown function	-8.25722	9.4712e-40		1
PVP01_0624500	PIR protein	-8.22858	1.11309e-05		1
PVP01_0102100	PIR protein, pseudogene	-8.22414	4.91024e-05
PVP01_0404200	tryptophan-rich protein	-8.21513	6.50547e-05	1	1
PVP01_1402100	Plasmodium exported protein, unknown function	-8.2022	7.7216e-23	1	1
PVP01_0524700	Plasmodium exported protein (PHIST), unknown function	-8.16743	2.70048e-16		1
PVP01_1402000	hypothetical protein	-8.1486	0.000170573		1
PVP01_1400700	Plasmodium exported protein, unknown function	-8.14005	7.85173e-05		1
PVP01_0931600	PF16 protein, putative	-8.11028	8.19733e-05		1
PVP01_0423200	Plasmodium exported protein (PHIST), unknown function	-8.04611	1.08909e-15	1	1
PVP01_0901100	PIR protein, pseudogene	-8.00852	6.84639e-05
PVP01_1402200	Plasmodium exported protein, unknown function	-8.00421	9.89072e-50		1
PVP01_1469300	conserved Plasmodium protein, unknown function	-7.97817	0.000150169		1
PVP01_0949200	tryptophan-rich protein	-7.96953	1.22283e-11	1
PVP01_0623600	PIR protein	-7.88913	0.000367151	1
PVP01_1401400	cytoadherence linked asexual protein, CLAG, putative	-7.87654	1.26916e-53	1	1
PVP01_0503400	tryptophan-rich protein	-7.87199	0.000341967	1	1
PVP01_0515800	Plasmodium exported protein (PHIST), unknown function	-7.85793	0.000253371		1
PVP01_1201700	hypothetical protein	-7.84987	0.000258757	1	1
PVP01_1033500	Plasmodium exported protein, unknown function	-7.81162	0.000353568		1
PVP01_0102200	PIR protein, pseudogene	-7.77825	3.07917e-14		1
PVP01_0503600	tryptophan-rich protein	-7.77165	3.35227e-09	1	1
PVP01_0404300	Plasmodium exported protein, unknown function	-7.76707	4.4208e-05		1
PVP01_0216800	Plasmodium exported protein, unknown function	-7.75547	1.86434e-05		1
PVP01_0735000	Plasmodium exported protein, unknown function	-7.73688	8.01217e-11		1
PVP01_0201400	PIR protein	-7.64425	1.15153e-11		1
PVP01_0300700	Plasmodium exported protein, unknown function	-7.64347	4.95872e-05	1	1
PVP01_1402500	conserved Plasmodium protein, unknown function	-7.63124	7.58188e-13
PVP01_1263000	conserved Plasmodium protein, unknown function	-7.60469	0.00102776		1
PVP01_0000130	tryptophan-rich protein	-7.60075	2.0933e-24		1
PVP01_1402400	reticulocyte binding protein 2a	-7.57712	2.49919e-34	1	1
PVP01_1469200	rhoptry neck protein 3, putative	-7.54718	3.02581e-71	1	1
PVP01_1201600	Plasmodium exported protein, unknown function	-7.5422	0.00107386	1	1
PVP01_0216900	knob-associated histidine-rich protein, putative	-7.54083	0.000955096		1
PVP01_1033600	skeleton-binding protein 1, putative	-7.53805	4.62767e-29		1
PVP01_0523400	Plasmodium exported protein (PHIST), unknown function	-7.53598	2.64929e-11
PVP01_0800900	cytoadherence-linked asexual protein (CLAG), putative	-7.52204	0.00118868	1	1
PVP01_0703800	high molecular weight rhoptry protein 3	-7.52161	2.08251e-85	1	1
PVP01_0010770	reticulocyte binding protein 1a, putative	-7.49229	0.00378723
PVP01_0524500	Plasmodium exported protein (PHIST), unknown function	-7.46925	0.00128601
PVP01_0503300	PIR protein, pseudogene	-7.46736	4.95872e-05
PVP01_1147800	Plasmodium exported protein, unknown function	-7.43683	0.00143006		1
PVP01_1470500	Plasmodium exported protein, unknown function	-7.39356	0.00311311
PVP01_1271100	erythrocyte membrane protein 3, putative	-7.37642	9.00134e-12	1	1
PVP01_0422900	Plasmodium exported protein, unknown function	-7.34034	0.00213843	1
PVP01_0007310	hypothetical protein	-7.31055	0.00224166		1
PVP01_0107500	rhoptry-associated membrane antigen, putative	-7.27459	1.11015e-38	1	1
PVP01_1220300	MSP7-like protein	-7.27413	1.71743e-20		1
PVP01_0534300	reticulocyte binding protein 2c	-7.25378	7.07753e-47	1	1
PVP01_0623700	Plasmodium exported protein (PHIST), unknown function	-7.23399	2.3484e-23	1	1
PVP01_0948800	tryptophan-rich protein	-7.19953	0.00423622		1
PVP01_1471500	Plasmodium exported protein, unknown function	-7.18969	0.00344422
PVP01_0700500	reticulocyte binding protein 2e, pseudogene	-7.17927	4.30737e-33
PVP01_0005430	PIR protein	-7.16682	0.0061073		1
PVP01_1101500	Plasmodium exported protein, unknown function	-7.15799	0.000182853		1
PVP01_1471400	reticulocyte binding protein 2, pseudogene	-7.15605	2.43477e-39
PVP01_0624000	Plasmodium exported protein, unknown function	-7.14824	0.00397551	1
PVP01_1271200	Plasmodium exported protein, unknown function	-7.14729	0.000186063		1
PVP01_0102600	small exported membrane protein 1, putative	-7.12677	0.00027716
PVP01_0102700	conserved Plasmodium protein, unknown function	-7.10019	0.00723914
PVP01_1031600	merozoite surface protein 3	-7.09146	5.82231e-26		1
PVP01_0216500	hypothetical protein	-7.07507	0.00624866	1	1
PVP01_0304100	dipeptidyl aminopeptidase 3, putative	-7.06496	0.00914119		1
PVP01_1201400	Plasmodium exported protein (PHIST), unknown function	-7.06416	1.70422e-22		1
PVP01_1402300	Plasmodium exported protein, unknown function	-7.05877	9.1396e-20		1
PVP01_0734900	Plasmodium exported protein (PHIST), unknown function	-7.0586	0.00760699	1
PVP01_0839000	PIR protein	-7.00856	0.00622023		1
PVP01_0004290	Plasmodium exported protein, unknown function	-7.00448	2.45286e-15		1
PVP01_0623200	Plasmodium exported protein, unknown function	-6.9739	0.00719741
PVP01_0004220	Plasmodium exported protein (PHISTc), unknown function	-6.96707	3.4161e-12		1
PVP01_1101300	Plasmodium exported protein, unknown function	-6.96268	0.000326759		1
PVP01_0003400	PIR protein	-6.94298	0.00944032		1
PVP01_0300600	Plasmodium exported protein, unknown function	-6.91443	0.0101191		1
PVP01_0000220	Plasmodium exported protein, unknown function	-6.88843	0.00909586		1
PVP01_0801000	hypothetical protein	-6.88067	0.0171783	1	1
PVP01_1338100	ankyrin-repeat protein, putative	-6.84655	0.0134823		1
PVP01_1472100	PIR protein	-6.84458	0.0101756	1	1
PVP01_0004280	Plasmodium exported protein, unknown function	-6.83544	0.0114593		1
PVP01_1033800	tryptophan-rich protein	-6.79736	1.21023e-50		1
PVP01_1101200	PIR protein, pseudogene	-6.77581	0.0123848
PVP01_1271400	Plasmodium exported protein, unknown function	-6.77271	0.0126176	1	1
PVP01_0215500	dynein light chain, putative	-6.77219	0.0125631
PVP01_0423400	Plasmodium exported protein, unknown function	-6.77087	3.09466e-25	1	1
PVP01_0838600	PIR protein	-6.75659	0.0137015	1	1
PVP01_1338500	rhoptry-associated protein 1	-6.73594	6.30881e-31		1
PVP01_1401600	Plasmodium exported protein, unknown function	-6.73072	0.0187476	1	1
PVP01_0601000	Plasmodium exported protein, unknown function	-6.70948	4.30257e-14		1
PVP01_0005760	PIR protein	-6.70414	0.0166072
PVP01_0300800	Plasmodium exported protein, unknown function	-6.69362	0.000919314		1
PVP01_1203100	inner membrane complex protein 1f, putative	-6.67996	1.52584e-19	1	1
PVP01_1469500	hypothetical protein	-6.67553	1.32855e-54	1	1
PVP01_0006260	PIR protein	-6.66261	0.0167836
PVP01_1401200	Plasmodium exported protein, unknown function	-6.62949	9.24555e-09		1
PVP01_0405000	liver stage antigen 3, putative	-6.62719	1.63448e-18	1	1
PVP01_1147100	conserved Plasmodium protein, unknown function	-6.61061	0.0220115		1
PVP01_0805500	conserved Plasmodium protein, unknown function	-6.59156	4.38966e-11	1	1
PVP01_1114600	dynein light chain, putative	-6.58021	0.0209086
PVP01_0800700	reticulocyte binding protein 2b	-6.56223	8.17357e-25	1	1
PVP01_0700300	Plasmodium exported protein, unknown function	-6.55479	7.70995e-06		1
PVP01_1469400	reticulocyte binding protein 3, pseudogene	-6.55115	9.26846e-23
PVP01_0000160	tryptophan-rich protein	-6.54752	3.11109e-31		1
PVP01_0004320	PIR protein	-6.53154	0.0244259
PVP01_0417300	serine-repeat antigen 4 (SERA)	-6.50796	1.97064e-47		1
PVP01_1471700	PIR protein	-6.5022	0.0268967		1
PVP01_0809700	tubulin--tyrosine ligase, putative	-6.50029	1.65037e-09		1
PVP01_0734700	hypothetical protein	-6.49341	7.16285e-12		1
PVP01_0305600	sexual stage antigen s16, putative	-6.44907	9.28898e-17
PVP01_0623800	duffy binding protein	-6.44762	4.78851e-34	1	1
PVP01_0106500	conserved Plasmodium protein, unknown function	-6.43519	0.0383663		1
PVP01_0004370	PIR protein	-6.39949	0.0481053		1
PVP01_1010400	dynein light chain Tctex-type, putative	-6.36625	0.0381745
PVP01_1271300	40 kDa heat shock protein, putative	-6.36479	3.07917e-14
PVP01_1271600	Plasmodium exported protein, unknown function	-6.31747	0.0423141		1
PVP01_0734300	conserved Plasmodium protein, unknown function	-6.3164	3.96054e-27		1
PVP01_0419600	DNA-directed RNA polymerase II 16 kDa subunit, putative	-6.31037	0.0405039		1
PVP01_0202300	Plasmodium exported protein, unknown function	-6.30155	2.04249e-12
PVP01_0903700	hypothetical protein	-6.28338	5.07071e-05		1
PVP01_0620400	hypothetical protein	-6.27352	3.24945e-29
PVP01_0208200	conserved Plasmodium protein, unknown function	-6.25886	0.0477055
PVP01_1204200	conserved Plasmodium protein, unknown function	-6.22734	4.07126e-07		1
PVP01_0615000	conserved Plasmodium protein, unknown function	-6.20617	1.65012e-58	1	1
PVP01_0317900	rhoptry-associated leucine zipper-like protein 1	-6.16382	1.89685e-12		1
PVP01_0217000	heat shock protein, putative	-6.10017	7.78278e-13		1
PVP01_0815000	conserved Plasmodium protein, unknown function	-6.09829	2.38707e-22	1	1
PVP01_1147600	Plasmodium exported protein, unknown function	-6.0969	3.54617e-28	1	1
PVP01_1147900	PIR protein	-6.08433	0.00675885
PVP01_0727900	high molecular weight rhoptry protein 2	-6.08258	2.18652e-66		1
PVP01_1147700	PIR protein	-6.03781	2.24241e-20		1
PVP01_0516400	Plasmodium exported protein (PHIST), unknown function	-6.03474	0.00675898
PVP01_0838200	Plasmodium exported protein (PHIST), unknown function	-6.01531	0.000249741	1
PVP01_1318000	conserved Plasmodium protein, unknown function	-6.00603	3.15524e-11		1
PVP01_1101400	tryptophan-rich protein	-5.93357	1.95311e-13	1	1
PVP01_0735200	Plasmodium exported protein, unknown function	-5.89796	4.13514e-10		1
PVP01_0417600	serine-repeat antigen 5 (SERA)	-5.87568	1.36526e-62		1
PVP01_0601300	Plasmodium exported protein (PHIST), unknown function	-5.82294	4.38878e-08		1
PVP01_0517600	rhoptry neck protein 5	-5.80187	1.48542e-20
PVP01_0503900	conserved Plasmodium protein, unknown function	-5.80122	6.57307e-07		1
PVP01_0504100	Plasmodium exported protein, unknown function	-5.79851	1.12218e-09		1
PVP01_0010200	merozoite surface protein 3, putative	-5.77972	1.07656e-05		1
PVP01_0523600	Plasmodium exported protein (PHIST), unknown function, pseudogene	-5.76011	5.10327e-07
PVP01_0722000	cyclin-dependent kinases regulatory subunit, putative	-5.73164	8.84199e-14
PVP01_0216600	conserved Plasmodium protein, unknown function	-5.71917	2.33651e-05	1	1
PVP01_1031400	merozoite surface protein 3	-5.70081	3.26989e-40		1
PVP01_1219800	MSP7-like protein	-5.69897	0.00642574		1
PVP01_0417200	serine-repeat antigen 5 (SERA)	-5.69436	1.93358e-83	1	1
PVP01_1034400	Plasmodium exported protein, unknown function	-5.65729	2.72087e-10	1	1
PVP01_0941100	conserved Plasmodium protein, unknown function	-5.64598	2.84481e-14		1
PVP01_1230900	glideosome associated protein with multiple membrane spans 1, putative	-5.61165	5.03258e-20
PVP01_0205200	phosphatidate cytidylyltransferase, putative	-5.61079	4.85328e-06
PVP01_0505500	conserved Plasmodium protein, unknown function	-5.60742	1.94301e-08		1
PVP01_1336900	p1/s1 nuclease, putative	-5.5959	1.84401e-21	1	1
PVP01_0620900	hypothetical protein	-5.57726	1.15481e-11	1	1
PVP01_0304300	6-cysteine protein	-5.57279	6.48581e-24
PVP01_0825300	conserved Plasmodium protein, unknown function	-5.56354	9.85582e-08		1
PVP01_1031500	merozoite surface protein 3	-5.49735	8.92791e-11		1
PVP01_0728900	merozoite surface protein 1	-5.48211	7.45237e-37		1
PVP01_1115100	serine/threonine protein kinase, putative	-5.46031	1.00397e-12	1	1
PVP01_0119200	Plasmodium exported protein (PHISTc), unknown function	-5.44585	6.29628e-19	1	1
PVP01_0800100	PIR protein	-5.43292	4.32577e-06		1
PVP01_1251600	conserved Plasmodium protein, unknown function	-5.43054	1.11873e-16		1
PVP01_1220000	MSP7-like protein	-5.42447	2.08988e-13		1
PVP01_1209200	inner membrane complex protein, putative	-5.37425	1.75729e-13	1	1
PVP01_0801600	Plasmodium exported protein, unknown function	-5.36651	3.54617e-28		1
PVP01_0417700	serine-repeat antigen (SERA)	-5.34487	2.69812e-44	1	1
PVP01_0803400	inner membrane complex protein 1c, putative	-5.34144	1.65037e-09	1	1
PVP01_1136400	6-cysteine protein	-5.32588	1.78545e-13		1
PVP01_0004400	PIR protein	-5.28763	1.07844e-05		1
PVP01_0918000	conserved Plasmodium protein, unknown function	-5.2621	5.61511e-05	1	1
PVP01_1018200	glideosome-associated protein 40, putative	-5.20792	1.95928e-14
PVP01_1409000	conserved Plasmodium protein, unknown function	-5.18213	0.0233012
PVP01_0702600	PH domain-containing protein, putative	-5.17193	0.0481053		1
PVP01_1250100	V-type H(+)-translocating pyrophosphatase, putative	-5.04446	1.49525e-36
PVP01_0916000	vivapain-2	-5.041	1.3897e-54		1
PVP01_1430300	acyl-CoA binding protein, putative	-5.02365	1.99701e-12	1	1
PVP01_0102400	VIR protein	-5.00881	0.0172551		1
PVP01_1312200	conserved Plasmodium protein, unknown function	-5.00733	1.43584e-08	1	1
PVP01_1144800	AP2 domain transcription factor, putative	-4.97954	8.41393e-34	1	1
PVP01_0700900	tryptophan-rich protein	-4.96562	0.000125636	1
PVP01_1141300	conserved Plasmodium protein, unknown function	-4.96293	1.92604e-14	1	1
PVP01_0916600	rhoptry neck protein 4	-4.9464	1.58163e-09		1
PVP01_0531900	asparagine-rich protein	-4.91554	7.79007e-10		1
PVP01_1025500	guanidine nucleotide exchange factor, putative	-4.90957	3.23426e-15		1
PVP01_1135000	conserved Plasmodium protein, unknown function	-4.90367	3.2395e-06		1
PVP01_0734500	cytoadherence linked asexual protein 7	-4.89924	7.5019e-63		1
PVP01_1466800	conserved Plasmodium protein, unknown function	-4.88793	2.67229e-27
PVP01_1255000	rhoptry neck protein 2	-4.88349	1.44859e-16	1	1
PVP01_0423500	knob-associated histidine-rich protein, putative	-4.88054	2.1239e-24		1
PVP01_1228300	TBC domain containing protein	-4.87641	2.86377e-05	1	1
[truncated: 1,457 more rows]

## Sheet: GO_enrichment_IESI1
Biological Process
[truncated: 52 more rows]

## Sheet: GO_enrichment_IESI2
Cellular Component
[truncated: 65 more rows]
