# Supplementary material for: Two Plasmodium vivax hypnozoite-expressed RNA-binding proteins inhibit liver stage replication
Source: Research Square preprint supplement (doi:10.21203/rs.3.rs-8080228/v1), 2025-11-28
Supplement: Supplementary file 3 [file 36c18b2fadfd1a345fe16560.xlsx]

## Sheet: README
Supplementary Table 1:
Each tab contains RBNS results for the IESI proteins tested from each parasite species. Results are shown for 6-mers enriched with IESI-1 and 9-mers enriched with IESI-2, with individual concentrations averaged to give enriched within a replicate

## Sheet: P_vivax_IESI1
P_vivax	Replicate_1			Replicate_2
6-mer	250 nM	500 nM	1000 nM	250 nM	500 nM	1000 nM	Average_250nM	Average_500nM	Average_1000nM	Average_all
UGAUGA	5.5064	5.6161	5.25	2.2767	6.46	6.039	5.25	3.89155	6.03805	4.99255
AUGAUG	5.1414	5.2626	5.0217	1.903	5.6663	5.4069	5.0217	3.5222	5.46445	4.49742
UUGAUG	4.8491	5.0601	4.6813	2.3037	5.5854	5.1672	4.6813	3.5764	5.32275	4.43946
UGAUUU	4.881	5.0028	4.691	2.0347	5.4322	5.0936	4.691	3.45785	5.2175	4.32114
UUGAUU	4.501	4.7346	4.4256	2.0059	5.1999	4.8605	4.4256	3.25345	4.96725	4.11877
AUGAUU	4.4905	4.793	4.5937	1.5792	5.0006	4.7927	4.5937	3.03485	4.8968	3.98297
UGAUGU	4.2449	4.5101	4.1326	1.8744	4.8538	4.4476	4.1326	3.05965	4.68195	3.84167
CUGAUG	4.0904	4.3407	4.0379	2.0449	4.9354	4.5911	4.0379	3.06765	4.63805	3.88583
UGAUGG	3.9094	4.108	3.7752	2.0916	4.7315	4.3482	3.7752	3.0005	4.41975	3.72779
UUUGAU	3.9412	4.247	3.9793	1.8547	4.5618	4.2743	3.9793	2.89795	4.4044	3.66207
GAUGAU	3.8598	4.1308	3.8821	1.7646	4.7182	4.4341	3.8821	2.8122	4.4245	3.67262
UGAUUA	3.8567	4.2507	4.1123	1.3674	4.4681	4.3226	4.1123	2.61205	4.3594	3.54031
CUGAUU	3.8934	4.1058	3.7529	1.7896	4.5422	4.1518	3.7529	2.8415	4.324	3.567
UGAUGC	3.7204	4.0373	3.9487	1.8974	4.3624	4.2667	3.9487	2.8089	4.19985	3.58066
UGAUUC	3.8473	4.1319	3.8937	1.7548	4.3853	4.1325	3.8937	2.80105	4.2586	3.53766
UGAUUG	3.5636	3.7593	3.3941	2.0077	4.388	3.9617	3.3941	2.78565	4.07365	3.43513
AAUGAU	3.6563	3.8914	3.9403	1.282	3.9863	4.0363	3.9403	2.46915	3.93885	3.27548
CUUGAU	3.2253	3.6469	3.4913	1.7876	4.0831	3.9089	3.4913	2.50645	3.865	3.27373
AUUGAU	3.5392	3.7249	3.666	1.4322	3.8998	3.8381	3.666	2.4857	3.81235	3.18902
GUGAUG	3.2637	3.5736	3.3428	1.8878	4.1196	3.8536	3.3428	2.57575	3.8466	3.27102
CAUGAU	3.5699	3.8713	3.8019	1.26	3.7456	3.6784	3.8019	2.41495	3.80845	3.11822
CCUGAU	3.0283	3.3602	3.1282	1.6692	3.7673	3.5071	3.1282	2.34875	3.56375	2.99738
AUGAUA	3.0835	3.4901	3.6443	1.051	3.4443	3.5964	3.6443	2.06725	3.4672	2.87841
UGAUAG	3.0036	3.3541	3.29	1.2725	3.5637	3.4957	3.29	2.13805	3.4589	2.86981
GUGAUU	2.9639	3.2242	3.0976	1.6295	3.5847	3.444	3.0976	2.2967	3.40445	2.90949
UUGAUA	2.865	3.3627	3.3246	1.2661	3.519	3.4791	3.3246	2.06555	3.44085	2.8492
UCUGAU	2.9397	3.2088	3.0175	1.4913	3.5487	3.3371	3.0175	2.2155	3.37875	2.83147
UAUGAU	3.088	3.2693	3.2726	1.204	3.3473	3.3506	3.2726	2.146	3.3083	2.77147
ACUGAU	2.9941	3.1999	3.1058	1.3403	3.4099	3.3097	3.1058	2.1672	3.3049	2.77297
UGAUAA	2.8191	3.2867	3.4263	1.0131	3.3039	3.4442	3.4263	1.9161	3.2953	2.73315
GUUGAU	2.7025	2.9815	2.7291	1.5616	3.356	3.0718	2.7291	2.13205	3.16875	2.66988
GAUUUG	2.8144	2.8727	2.6205	1.7257	3.255	2.9693	2.6205	2.27005	3.06385	2.65073
GAUGAA	2.7316	2.8929	2.8284	1.4255	3.1086	3.0393	2.8284	2.07855	3.00075	2.58018
GCUGAU	2.6182	2.8165	2.6771	1.5223	3.1207	2.9662	2.6771	2.07025	2.9686	2.55419
UGUGAU	2.5349	2.8005	2.7175	1.4686	3.1313	3.0386	2.7175	2.00175	2.9659	2.55394
UGAUAC	2.4129	2.8318	2.8737	1.2601	2.9409	2.9844	2.8737	1.8365	2.88635	2.46366
CGAUGA	2.3747	2.7042	2.6028	1.452	3.056	2.9414	2.6028	1.91335	2.8801	2.47428
UGAUAU	2.4503	2.7879	2.9017	1.0841	2.8754	2.9927	2.9017	1.7672	2.83165	2.40879
CUGAUA	2.4183	2.8094	2.8098	1.1533	2.948	2.9484	2.8098	1.7858	2.8787	2.42067
GAUGAC	2.4684	2.6741	2.514	1.5255	3.0226	2.8417	2.514	1.99695	2.84835	2.45818
GAUGGC	2.4957	2.547	2.3605	1.7192	2.8925	2.6806	2.3605	2.10745	2.71975	2.41333
AGUGAU	2.4091	2.6859	2.6276	1.251	2.8739	2.8115	2.6276	1.83005	2.7799	2.36232
CGUGAU	2.3291	2.5365	2.5127	1.4815	2.8542	2.8274	2.5127	1.9053	2.69535	2.37941
GAUGAG	2.3322	2.4925	2.4008	1.546	2.8869	2.7807	2.4008	1.9391	2.6897	2.37387
GAUUUU	2.5038	2.6441	2.4651	1.4465	2.771	2.5834	2.4651	1.97515	2.70755	2.32478
GAUGUG	2.3039	2.5256	2.315	1.5541	2.8661	2.6271	2.315	1.929	2.69585	2.33119
GAUUGA	2.2657	2.4155	2.2915	1.5043	2.7896	2.6464	2.2915	1.885	2.60255	2.28656
CACCCG	1.4119	1.7632	1.7678	2.6884	3.0247	3.0326	1.7678	2.05015	2.39395	2.49293
CCCGAG	1.4091	1.7193	1.7161	2.6347	3.028	3.0223	1.7161	2.0219	2.37365	2.46611
GAUUUC	2.3204	2.4881	2.3759	1.379	2.4991	2.3864	2.3759	1.8497	2.4936	2.16395
GAUUGC	2.2135	2.3258	2.1048	1.6295	2.6566	2.4042	2.1048	1.9215	2.4912	2.2013
GUGAUA	2.039	2.3423	2.4742	1.1133	2.5149	2.6564	2.4742	1.57615	2.4286	2.12726
GAUGCC	1.8852	2.1119	2.0586	1.736	2.4968	2.4338	2.0586	1.8106	2.30435	2.14003
GGUGAU	1.9747	2.1899	2.1469	1.4165	2.4968	2.4478	2.1469	1.6956	2.34335	2.09116
GAUGGG	2.0178	2.0962	2.0054	1.6073	2.5003	2.3919	2.0054	1.81255	2.29825	2.10262
ACCCGA	1.4436	1.743	1.7376	2.2079	2.6829	2.6747	1.7376	1.82575	2.21295	2.22363
GCGAUG	1.969	2.1894	2.0087	1.4928	2.4684	2.2647	2.0087	1.7309	2.3289	2.04907
UGAUCU	2.0007	2.1547	2.14	1.2392	2.347	2.331	2.14	1.61995	2.25085	1.988
CCUUGA	1.6956	1.882	1.9072	1.8399	2.3883	2.4202	1.9072	1.76775	2.13515	2.07642
UUGAUC	1.9103	2.1215	2.0972	1.3245	2.3517	2.3247	2.0972	1.6174	2.2366	1.99202
GCCCGA	1.4462	1.6718	1.6675	2.1536	2.4846	2.4781	1.6675	1.7999	2.0782	2.11032
GACACC	1.4553	1.66	1.6944	2.209	2.4106	2.4606	1.6944	1.83215	2.0353	2.10701

## Sheet: Pyoelii_IESI1
P_yoelii	Replicate_1			Replicate_2
6-mer	250 nM	500 nM	1000 nM	250 nM	500 nM	1000 nM	Average_250nM	Average_500nM	Average_1000nM	Average_all
UGAUGA	9.088	7.8702	7.7269	5.1284	6.3368	4.9311	7.7269	7.1082	7.1035	6.38915
AUGAUG	8.5966	7.4315	7.4667	4.7586	5.8071	4.5446	7.4667	6.6776	6.6193	5.97898
UGAUUU	7.8998	7.0583	7.2204	4.6709	5.717	4.409	7.2204	6.28535	6.38765	5.78172
UUGAUG	7.9372	6.9514	6.9561	4.4324	5.4761	4.335	6.9561	6.1848	6.21375	5.59969
AUGAUU	7.3378	6.6346	6.9434	4.2147	5.2607	4.1275	6.9434	5.77625	5.94765	5.37837
UUGAUU	7.2347	6.6482	6.8418	4.3216	5.2918	4.2338	6.8418	5.77815	5.97	5.40619
UGAUGU	6.9997	6.2907	6.3872	3.9893	4.9064	3.9744	6.3872	5.4945	5.59855	5.05839
UGAUUA	6.3087	5.8808	6.3013	3.6792	4.7245	3.7771	6.3013	4.99395	5.30265	4.79645
UUUGAU	6.2846	5.8204	6.0533	3.7947	4.6584	3.7349	6.0533	5.03965	5.2394	4.75339
CUGAUG	6.4798	5.8016	5.8671	3.7337	4.573	3.7987	5.8671	5.10675	5.1873	4.71109
CUGAUU	6.3265	5.6857	5.8211	3.7127	4.548	3.7119	5.8211	5.0196	5.11685	4.65503
UGAUUC	6.2447	5.6673	5.913	3.6387	4.3659	3.657	5.913	4.9417	5.0166	4.58882
UGAUGC	6.0375	5.5039	5.712	3.4674	4.2415	3.5673	5.712	4.75245	4.8727	4.43556
GAUGAU	6.074	5.5241	5.5852	3.7202	4.5182	3.6879	5.5852	4.8971	5.02115	4.57163
CAUGAU	5.8447	5.3572	5.7194	3.2041	3.9654	3.2726	5.7194	4.5244	4.6613	4.22453
AUUGAU	5.7535	5.2888	5.5202	3.3831	4.2012	3.3871	5.5202	4.5683	4.745	4.30082
AAUGAU	5.7601	5.2238	5.5575	3.3692	4.123	3.3244	5.5575	4.56465	4.6734	4.26869
UGAUGG	5.9645	5.2385	5.2076	3.6127	4.2975	3.5795	5.2076	4.7886	4.768	4.37565
UGAUUG	5.4499	4.9541	4.9366	3.4323	4.1128	3.4399	4.9366	4.4411	4.53345	4.14936
AUGAUA	4.7912	4.6257	5.1417	2.8138	3.5816	2.9988	5.1417	3.8025	4.10365	3.74034
CUUGAU	4.8863	4.7006	4.9271	3.0233	3.7078	3.2047	4.9271	3.9548	4.2042	3.83698
GUGAUG	5.0587	4.6968	4.6829	3.1196	3.8246	3.297	4.6829	4.08915	4.2607	3.87899
UAUGAU	4.8936	4.5887	4.9046	2.8953	3.6576	3.0098	4.9046	3.89445	4.12315	3.74748
CCUGAU	4.7577	4.4686	4.649	2.8462	3.4796	3.0403	4.649	3.80195	3.9741	3.63186
UUGAUA	4.4167	4.3757	4.8105	2.7534	3.4975	2.9698	4.8105	3.58505	3.9366	3.59214
UGAUAG	4.5278	4.3336	4.5461	2.7889	3.4525	2.9587	4.5461	3.65835	3.89305	3.5496
UGAUAA	4.3424	4.2076	4.6915	2.6069	3.3248	2.7951	4.6915	3.47465	3.7662	3.44319
GUGAUU	4.5506	4.239	4.44	2.8888	3.541	3.008	4.44	3.7197	3.89	3.58125
UCUGAU	4.5131	4.2027	4.422	2.811	3.4484	2.9886	4.422	3.66205	3.82555	3.52627
ACUGAU	4.5577	4.1692	4.3634	2.7462	3.352	2.8417	4.3634	3.65195	3.7606	3.45264
GAUUUG	4.2038	3.8115	3.7824	2.8187	3.2404	2.729	3.7824	3.51125	3.52595	3.26795
GUUGAU	4.018	3.8089	3.9581	2.663	3.1971	2.7561	3.9581	3.3405	3.503	3.2363
UGAUAU	3.7222	3.7673	4.1902	2.3754	3.0675	2.6316	4.1902	3.0488	3.4174	3.12182
GCUGAU	3.922	3.6988	3.7946	2.5216	2.9882	2.6511	3.7946	3.2218	3.3435	3.0868
GAUGAA	4.0714	3.6631	3.6763	2.5923	2.9971	2.5239	3.6763	3.33185	3.3301	3.07526
UGAUAC	3.6461	3.5945	3.9575	2.2901	2.8418	2.5289	3.9575	2.9681	3.21815	2.96742
UGUGAU	3.7676	3.6233	3.7765	2.4678	3.0397	2.6424	3.7765	3.1177	3.3315	3.0626
CUGAUA	3.6583	3.588	3.8848	2.2565	2.8476	2.5009	3.8848	2.9574	3.2178	2.94417
GAUUUU	3.707	3.4256	3.5596	2.5034	2.9157	2.3758	3.5596	3.1052	3.17065	2.93839
GAUGAC	3.6587	3.4145	3.465	2.4892	2.8787	2.5285	3.465	3.07395	3.1466	2.93032
AGUGAU	3.5283	3.361	3.5621	2.325	2.846	2.4515	3.5621	2.92665	3.1035	2.86913
CGAUGA	3.4819	3.3588	3.4651	2.3949	2.8006	2.5006	3.4651	2.9384	3.0797	2.86322
CGUGAU	3.4643	3.2612	3.3892	2.2687	2.7108	2.4895	3.3892	2.8665	2.986	2.78512
GAUUUC	3.3826	3.1986	3.3203	2.2192	2.5804	2.2093	3.3203	2.8009	2.8895	2.66993
GAUGGC	3.5608	3.1208	3.0979	2.4283	2.691	2.4101	3.0979	2.99455	2.9059	2.75463
GAUGUG	3.4619	3.1446	3.1352	2.3544	2.7285	2.3896	3.1352	2.90815	2.93655	2.74207
GAUGAG	3.2538	3.0734	3.0604	2.3786	2.7215	2.3815	3.0604	2.8162	2.89745	2.70927
GAUUGA	3.2397	3.0283	3.0467	2.3284	2.6879	2.3565	3.0467	2.78405	2.8581	2.67694
GUGAUA	2.9668	2.9417	3.2017	2.0358	2.5035	2.235	3.2017	2.5013	2.7226	2.53332
GAUUGC	3.1665	2.8547	2.8738	2.2294	2.517	2.2519	2.8738	2.69795	2.68585	2.54265
GAUGUU	2.9178	2.803	2.8737	2.0454	2.3232	2.0583	2.8737	2.4816	2.5631	2.39088
GAUUCU	2.8856	2.7659	2.8453	1.9933	2.3222	2.0561	2.8453	2.43945	2.54405	2.36673
GAUUCA	2.8467	2.7017	2.9168	0	0	0	2.9168	0	0	0
UGAUCU	2.7388	2.7488	2.9344	1.9589	2.3064	2.1351	2.9344	2.34885	2.5276	2.36854
AUGAUC	2.7433	2.7105	2.9656	0	0	0	2.9656	0	0	0
UUUUGA	2.8675	2.6879	2.7586	2.0667	2.3509	1.9716	2.7586	2.4671	2.5194	2.35572
AUUUGA	2.8456	2.6657	2.7504	0	0	0	2.7504	0	0	0
UUGAUC	2.6306	2.7029	2.8969	1.9783	2.3334	2.1187	2.8969	2.30445	2.51815	2.35832
GAUUAC	2.7234	2.6546	2.8181	0	0	0	2.8181	0	0	0
GAUGCC	2.7035	2.6045	2.8578	2.0564	2.306	2.2027	2.8578	2.37995	2.45525	2.37635
GGUGAU	2.6594	2.6923	2.7458	1.9954	2.3789	2.1773	2.7458	2.3274	2.5356	2.36007
AGAUGA	2.6889	2.6108	2.718	0	0	0	2.718	0	0	0
UGAUCC	2.5824	2.5975	2.8244	0	0	0	2.8244	0	0	0
CGAUUU	2.5935	2.5581	2.7064	0	0	0	2.7064	0	0	0
GCGAUG	2.6469	2.5622	2.6486	0	0	0	2.6486	0	0	0
GAUGCA	2.6609	2.4994	2.6758	0	0	0	2.6758	0	0	0
GAUUUA	2.5832	2.5208	2.6959	0	0	0	2.6959	0	0	0
GAUUCG	2.6418	2.4926	2.5149	0	0	0	2.5149	0	0	0
ACGAUG	2.5011	2.4607	2.5894	0	0	0	2.5894	0	0	0
GAUGCG	2.5426	2.4535	2.5151	0	0	0	2.5151	0	0	0
GAUGUC	2.5471	2.4391	2.4954	0	0	0	2.4954	0	0	0
GAUGUA	2.5053	2.4145	2.525	0	0	0	2.525	0	0	0
GAUGCU	2.4762	2.4161	2.5143	0	0	0	2.5143	0	0	0
GAUAGC	2.5271	2.394	2.4832	0	0	0	2.4832	0	0	0
GAUUAA	2.4699	2.367	2.5593	0	0	0	2.5593	0	0	0
UGAUCA	2.3663	2.3835	2.6354	0	0	0	2.6354	0	0	0
CUGAUC	2.3865	2.3849	2.5793	0	0	0	2.5793	0	0	0
GAUUAG	2.4412	2.4056	2.4996	0	0	0	2.4996	0	0	0
CCGAUG	2.441	2.3991	2.4986	0	0	0	2.4986	0	0	0
GAUGGG	2.5355	2.4296	2.3601	2.0809	2.3159	2.0859	2.3601	2.3082	2.37275	2.25396
GAUUCC	2.4223	2.3674	2.4877	0	0	0	2.4877	0	0	0
AAAUGA	2.484	2.2951	2.3961	0	0	0	2.3961	0	0	0
GAAUGA	2.4977	2.3144	2.2991	0	0	0	2.2991	0	0	0
GAUAUG	2.3	2.3151	2.4328	0	0	0	2.4328	0	0	0
AAUUGA	2.4158	2.26	2.3103	0	0	0	2.3103	0	0	0
CUUUGA	2.328	2.2763	2.3172	0	0	0	2.3172	0	0	0
ACCUGA	2.3411	2.233	2.3014	0	0	0	2.3014	0	0	0
CCGAUU	2.3026	2.2261	2.3429	0	0	0	2.3429	0	0	0
UCGAUG	2.222	2.2385	2.367	0	0	0	2.367	0	0	0
CCAUGA	2.3175	2.2149	2.2924	0	0	0	2.2924	0	0	0
ACUUGA	2.308	2.2365	2.272	0	0	0	2.272	0	0	0
GAUUGG	2.3484	2.2611	2.1747	0	0	0	2.1747	0	0	0
CAAUGA	2.2734	2.1807	2.2835	0	0	0	2.2835	0	0	0
CCCUGA	2.2841	2.2024	2.2465	0	0	0	2.2465	0	0	0
GCGAUU	2.1919	2.2071	2.2844	0	0	0	2.2844	0	0	0
CAUUGA	2.2539	2.1556	2.238	0	0	0	2.238	0	0	0
GAUUAU	2.1584	2.1444	2.3298	0	0	0	2.3298	0	0	0
GAUGGA	2.2891	2.1522	2.186	0	0	0	2.186	0	0	0
CGAUUG	2.2469	2.1773	2.2019	0	0	0	2.2019	0	0	0
CCUUGA	2.175	2.1484	2.2284	0	0	0	2.2284	0	0	0
GCUUGA	2.2275	2.1484	2.1625	0	0	0	2.1625	0	0	0
GCAUGA	2.2348	2.1296	2.1381	0	0	0	2.1381	0	0	0
CGAUGC	2.0714	2.1023	2.3061	0	0	0	2.3061	0	0	0
UCUUGA	2.1745	2.1199	2.1622	0	0	0	2.1622	0	0	0
UUCUGA	2.2095	2.0985	2.1477	0	0	0	2.1477	0	0	0
CGAUUC	2.0779	2.1184	2.2356	0	0	0	2.2356	0	0	0
UCGAUU	2.064	2.0932	2.2026	0	0	0	2.2026	0	0	0
AUUUUG	2.1735	2.0515	2.0935	0	0	0	2.0935	0	0	0
GCCUGA	2.1366	2.0746	2.0677	0	0	0	2.0677	0	0	0
ACGAUU	2.015	2.0402	2.1782	0	0	0	2.1782	0	0	0
CGAUGU	2.033	2.0393	2.1326	0	0	0	2.1326	0	0	0
CCCGAU	2.0762	1.9977	2.0938	0	0	0	2.0938	0	0	0
CACUGA	2.1075	1.9783	2.0522	0	0	0	2.0522	0	0	0
ACAUGA	2.0737	1.943	2.0615	0	0	0	2.0615	0	0	0
UCAUGA	2.0553	1.9336	2.0506	0	0	0	2.0506	0	0	0
CGAUGG	2.0481	1.9797	2.0009	0	0	0	2.0009	0	0	0
UGCUGA	2.043	1.9781	1.9918	0	0	0	1.9918	0	0	0
GAUAAA	1.9635	1.9502	2.0976	0	0	0	2.0976	0	0	0
UUCGAU	1.9324	1.9538	2.0768	0	0	0	2.0768	0	0	0
AUGUGA	2.0521	1.9393	1.9631	0	0	0	1.9631	0	0	0
UGCGAU	1.9158	1.9573	2.03	0	0	0	2.03	0	0	0
GAGAUG	1.9687	1.9374	1.9948	0	0	0	1.9948	0	0	0
GUUUGA	2.0434	1.9417	1.9116	0	0	0	1.9116	0	0	0
GAUAGA	1.9194	1.9313	1.9983	0	0	0	1.9983	0	0	0
AACUGA	2.0203	1.875	1.9172	0	0	0	1.9172	0	0	0
CUCUGA	1.9662	1.9073	1.9361	0	0	0	1.9361	0	0	0
CUAUGA	1.9577	1.861	1.9467	0	0	0	1.9467	0	0	0
GAUAAC	1.8649	1.8615	2.0193	0	0	0	2.0193	0	0	0
AAGAUG	1.8877	1.8712	1.9689	0	0	0	1.9689	0	0	0
UGUUGA	1.9449	1.89	1.8852	0	0	0	1.8852	0	0	0
GAUACC	1.8341	1.8523	1.9891	0	0	0	1.9891	0	0	0
GAUGGU	1.9221	1.8472	1.8991	0	0	0	1.8991	0	0	0
AUCUGA	1.9179	1.8427	1.8861	0	0	0	1.8861	0	0	0
ACCCGA	1.9889	1.7894	1.856	0	0	0	1.856	0	0	0
CGCGAU	1.848	1.8447	1.9229	0	0	0	1.9229	0	0	0
GAUAGG	1.8542	1.8625	1.8976	0	0	0	1.8976	0	0	0
CAGAUG	1.8483	1.8304	1.9275	0	0	0	1.9275	0	0	0
CACGAU	1.8045	1.8226	1.9534	0	0	0	1.9534	0	0	0
GACUGA	1.941	1.8129	1.789	0	0	0	1.789	0	0	0
CACCCG	1.9641	1.7225	1.8354	0	0	0	1.8354	0	0	0
GUAUGA	1.9173	1.7996	1.7863	0	0	0	1.7863	0	0	0
UCCUGA	1.8382	1.7973	1.8441	0	0	0	1.8441	0	0	0
CUCGAU	1.7678	1.7982	1.8919	0	0	0	1.8919	0	0	0
CGAUUA	1.7321	1.7856	1.9394	0	0	0	1.9394	0	0	0
AGCGAU	1.7791	1.7952	1.8583	0	0	0	1.8583	0	0	0
GAUAAG	1.7502	1.7717	1.9023	0	0	0	1.9023	0	0	0
CGCUGA	1.8208	1.7798	1.7965	0	0	0	1.7965	0	0	0
AUAUGA	1.7786	1.7436	1.8449	0	0	0	1.8449	0	0	0
GCCCGA	1.8418	1.7326	1.7875	0	0	0	1.7875	0	0	0
GAUCUG	1.8061	1.7602	1.7913	0	0	0	1.7913	0	0	0
AUUUGC	1.8211	1.7554	1.7666	0	0	0	1.7666	0	0	0
UUAUGA	1.7611	1.7201	1.8107	0	0	0	1.8107	0	0	0
GAUAAU	1.6956	1.7262	1.8587	0	0	0	1.8587	0	0	0
ACCGAU	1.734	1.72	1.8192	0	0	0	1.8192	0	0	0
AGAUUU	1.7181	1.7153	1.8278	0	0	0	1.8278	0	0	0
AUUCUG	1.7638	1.7301	1.7359	0	0	0	1.7359	0	0	0
GUGAUC	1.6808	1.711	1.8115	0	0	0	1.8115	0	0	0
AUUGCG	1.8264	1.6985	1.6731	0	0	0	1.6731	0	0	0
GAUACA	1.6668	1.6971	1.7929	0	0	0	1.7929	0	0	0
CUGUGA	1.7422	1.7044	1.708	0	0	0	1.708	0	0	0
GGAUGA	1.748	1.7111	1.6912	0	0	0	1.6912	0	0	0
GACACC	1.7784	1.6512	1.7124	0	0	0	1.7124	0	0	0
CACCUG	1.7159	1.6689	1.7342	0	0	0	1.7342	0	0	0
CCGUGA	1.7506	1.677	1.6887	0	0	0	1.6887	0	0	0
AUGGCC	1.7593	1.6614	1.6798	0	0	0	1.6798	0	0	0
UUUUUG	1.7466	1.6532	1.6971	0	0	0	1.6971	0	0	0
UGACAC	1.7299	1.6602	1.6957	0	0	0	1.6957	0	0	0
UCCGAU	1.6743	1.6733	1.7371	0	0	0	1.7371	0	0	0
AGCUGA	1.7221	1.6767	1.6764	0	0	0	1.6764	0	0	0
AUGACC	1.6962	1.6641	1.7124	0	0	0	1.7124	0	0	0
CCCGAG	1.8335	1.5887	1.642	0	0	0	1.642	0	0	0
UGAUCG	1.639	1.678	1.7387	0	0	0	1.7387	0	0	0
UAAUGA	1.6888	1.6527	1.7137	0	0	0	1.7137	0	0	0
AUGGCG	1.7908	1.6491	1.6143	0	0	0	1.6143	0	0	0
GAGUGA	1.7219	1.6789	1.6413	0	0	0	1.6413	0	0	0
AGUUGA	1.7091	1.6509	1.6792	0	0	0	1.6792	0	0	0
CCCCGA	1.7209	1.6339	1.6707	0	0	0	1.6707	0	0	0
UAGAUG	1.6369	1.6476	1.7293	0	0	0	1.7293	0	0	0
AACGAU	1.6231	1.6435	1.7284	0	0	0	1.7284	0	0	0
GAUAUU	1.5678	1.6517	1.7683	0	0	0	1.7683	0	0	0
ACACCC	1.7408	1.5724	1.6681	0	0	0	1.6681	0	0	0
UGACUG	1.6929	1.6461	1.6223	0	0	0	1.6223	0	0	0
GAAAUG	1.7044	1.6373	1.6177	0	0	0	1.6177	0	0	0
UUGUGA	1.6549	1.6406	1.6464	0	0	0	1.6464	0	0	0
GAUACG	1.5984	1.6418	1.7001	0	0	0	1.7001	0	0	0
GGUUGA	1.6772	1.636	1.6242	0	0	0	1.6242	0	0	0
AUGGCA	1.731	1.6033	1.59	0	0	0	1.59	0	0	0
UAUUGA	1.6582	1.6144	1.6508	0	0	0	1.6508	0	0	0
AUGACA	1.6457	1.6094	1.6663	0	0	0	1.6663	0	0	0
GCACCC	1.6815	1.5526	1.6538	0	0	0	1.6538	0	0	0
GCUAUG	1.6891	1.5855	1.6062	0	0	0	1.6062	0	0	0
AUGAAA	1.709	1.5865	1.5754	0	0	0	1.5754	0	0	0
UGAAUG	1.6678	1.6006	1.5703	0	0	0	1.5703	0	0	0
CAAUUG	1.622	1.5805	1.6231	0	0	0	1.6231	0	0	0
CUUGAC	1.6091	1.593	1.6149	0	0	0	1.6149	0	0	0
GCGUGA	1.6314	1.5896	1.585	0	0	0	1.585	0	0	0
CAGUGA	1.5999	1.5818	1.6232	0	0	0	1.6232	0	0	0
GGCUGA	1.6519	1.5975	1.5548	0	0	0	1.5548	0	0	0
GCCGAU	1.5819	1.5741	1.6366	0	0	0	1.6366	0	0	0
GAUAUC	1.5454	1.5722	1.6704	0	0	0	1.6704	0	0	0
CCAUUG	1.6099	1.5779	1.5927	0	0	0	1.5927	0	0	0
UACUGA	1.6094	1.5815	1.586	0	0	0	1.586	0	0	0
GAUACU	1.5462	1.5821	1.6481	0	0	0	1.6481	0	0	0
AUUGCC	1.6148	1.5695	1.5886	0	0	0	1.5886	0	0	0
GACUUG	1.611	1.5858	1.5708	0	0	0	1.5708	0	0	0
AUGACG	1.609	1.5731	1.5753	0	0	0	1.5753	0	0	0
CCGAGA	1.6733	1.5327	1.548	0	0	0	1.548	0	0	0
UUUCUG	1.5947	1.5748	1.5794	0	0	0	1.5794	0	0	0
AUGGCU	1.6542	1.5556	1.5387	0	0	0	1.5387	0	0	0
UGCUUG	1.6245	1.5531	1.5669	0	0	0	1.5669	0	0	0
AAUUUG	1.6006	1.5438	1.5987	0	0	0	1.5987	0	0	0
AUUGCU	1.6396	1.5527	1.5477	0	0	0	1.5477	0	0	0
UGACCC	1.5663	1.5549	1.6187	0	0	0	1.6187	0	0	0
AUGAGA	1.5955	1.5758	1.5685	0	0	0	1.5685	0	0	0
UUCUUG	1.5498	1.5818	1.599	0	0	0	1.599	0	0	0
AAGUGA	1.608	1.5302	1.5852	0	0	0	1.5852	0	0	0
CCCGGG	1.6342	1.5185	1.5518	0	0	0	1.5518	0	0	0
UGGUGA	1.5579	1.5892	1.5527	0	0	0	1.5527	0	0	0
GCAAUG	1.584	1.5251	1.5755	0	0	0	1.5755	0	0	0
UUGACA	1.5691	1.5369	1.5607	0	0	0	1.5607	0	0	0
AUUCGA	1.5447	1.5402	1.5733	0	0	0	1.5733	0	0	0
CAGAUU	1.5305	1.5205	1.6055	0	0	0	1.6055	0	0	0
AGAUUG	1.5843	1.526	1.5369	0	0	0	1.5369	0	0	0
AGAUGC	1.4708	1.5162	1.6492	0	0	0	1.6492	0	0	0
GAGAUU	1.5213	1.5389	1.5582	0	0	0	1.5582	0	0	0
CCCCGG	1.543	1.5268	1.5466	0	0	0	1.5466	0	0	0
CUAUUG	1.6105	1.511	1.4879	0	0	0	1.4879	0	0	0
AUUUGG	1.5628	1.5159	1.5281	0	0	0	1.5281	0	0	0
GACCUG	1.5359	1.5176	1.5349	0	0	0	1.5349	0	0	0
UGCCUG	1.5117	1.5204	1.5498	0	0	0	1.5498	0	0	0
UUGCUG	1.5213	1.5309	1.5235	0	0	0	1.5235	0	0	0
UGACGA	1.5215	1.5291	1.521	0	0	0	1.521	0	0	0
ACCCUG	1.5339	1.5072	1.5204	0	0	0	1.5204	0	0	0
AGAUUC	1.4726	1.4917	1.5794	0	0	0	1.5794	0	0	0
CGUUGA	1.5369	1.4968	1.5074	0	0	0	1.5074	0	0	0
UACGAU	1.4642	1.4981	1.5776	0	0	0	1.5776	0	0	0
AUGCUG	1.5068	1.51	1.5223	0	0	0	1.5223	0	0	0
GACGAU	1.5045	1.4973	1.5333	0	0	0	1.5333	0	0	0
UGAGAU	1.4852	1.5241	1.5244	0	0	0	1.5244	0	0	0
UGGCAC	1.567	1.4584	1.5033	0	0	0	1.5033	0	0	0
GAUUGU	1.5106	1.504	1.513	0	0	0	1.513	0	0	0
CUGAGA	1.5462	1.507	1.4619	0	0	0	1.4619	0	0	0
AUGAAG	1.534	1.5105	1.4704	0	0	0	1.4704	0	0	0
CACCCA	1.5313	1.4436	1.5369	0	0	0	1.5369	0	0	0
CCCCUG	1.4995	1.4908	1.5151	0	0	0	1.5151	0	0	0
GACAUG	1.5159	1.4849	1.5023	0	0	0	1.5023	0	0	0
CCCGAA	1.5523	1.4778	1.4648	0	0	0	1.4648	0	0	0
CGACUG	1.5432	1.481	1.4649	0	0	0	1.4649	0	0	0
AAAAUG	1.5392	1.4506	1.4993	0	0	0	1.4993	0	0	0
GUGUGA	1.4978	1.5118	1.4778	0	0	0	1.4778	0	0	0
AUCGAU	1.4627	1.4762	1.5474	0	0	0	1.5474	0	0	0
CGCCCG	1.5223	1.4464	1.5148	0	0	0	1.5148	0	0	0
AUGAGC	1.5126	1.4783	1.4896	0	0	0	1.4896	0	0	0
GAAUUG	1.5133	1.4943	1.4616	0	0	0	1.4616	0	0	0
GUCUGA	1.5586	1.4602	1.4414	0	0	0	1.4414	0	0	0
GAUCCG	1.4775	1.4682	1.5125	0	0	0	1.5125	0	0	0
AGAUGU	1.4494	1.4668	1.5394	0	0	0	1.5394	0	0	0
CCCUUG	1.4632	1.4933	1.4946	0	0	0	1.4946	0	0	0
UUUGAC	1.4757	1.4717	1.4996	0	0	0	1.4996	0	0	0
AGAUGG	1.485	1.4587	1.4905	0	0	0	1.4905	0	0	0
ACGUGA	1.5074	1.4406	1.4787	0	0	0	1.4787	0	0	0
GGCACC	1.5271	1.4076	1.4907	0	0	0	1.4907	0	0	0
AUGUUG	1.496	1.4696	1.4582	0	0	0	1.4582	0	0	0
UGCCCG	1.4551	1.4586	1.5076	0	0	0	1.5076	0	0	0
UUGCGA	1.4924	1.473	1.4514	0	0	0	1.4514	0	0	0
CGAGAA	1.5521	1.4496	1.4128	0	0	0	1.4128	0	0	0
AUUGAC	1.452	1.4618	1.4939	0	0	0	1.4939	0	0	0
CCCGGA	1.4971	1.4612	1.4447	0	0	0	1.4447	0	0	0
CGAGAU	1.467	1.4641	1.4718	0	0	0	1.4718	0	0	0
AUGACU	1.477	1.4577	1.4681	0	0	0	1.4681	0	0	0
UGGCUG	1.4846	1.4882	1.4277	0	0	0	1.4277	0	0	0
AUUUCG	1.4672	1.4577	1.4718	0	0	0	1.4718	0	0	0
CGAUAG	1.4166	1.4619	1.5163	0	0	0	1.5163	0	0	0
CACUUG	1.4827	1.4542	1.457	0	0	0	1.457	0	0	0
GCCCUG	1.4455	1.4642	1.4719	0	0	0	1.4719	0	0	0
ACCCGG	1.5001	1.4395	1.4364	0	0	0	1.4364	0	0	0
GGAAUG	1.4963	1.455	1.4192	0	0	0	1.4192	0	0	0
CCUGAG	1.4833	1.4469	1.4385	0	0	0	1.4385	0	0	0
CCCAUG	1.4513	1.4326	1.4843	0	0	0	1.4843	0	0	0
AUUCGC	1.4739	1.4336	1.4579	0	0	0	1.4579	0	0	0
ACCUUG	1.4426	1.4384	1.4746	0	0	0	1.4746	0	0	0
UGAGAA	1.4897	1.4634	1.4007	0	0	0	1.4007	0	0	0
GAUCCC	1.4102	1.4252	1.5074	0	0	0	1.5074	0	0	0
CCCAGA	1.4706	1.4266	1.4447	0	0	0	1.4447	0	0	0
AGAAUG	1.4901	1.4365	1.4079	0	0	0	1.4079	0	0	0
AUUGCA	1.4915	1.423	1.4122	0	0	0	1.4122	0	0	0
GAGAAU	1.5157	1.4134	1.3975	0	0	0	1.3975	0	0	0
AUGAAC	1.48	1.4208	1.424	0	0	0	1.424	0	0	0
GCCUUG	1.4207	1.4342	1.4684	0	0	0	1.4684	0	0	0
GCUUUG	1.4258	1.445	1.4386	0	0	0	1.4386	0	0	0
AUUUCC	1.4055	1.4168	1.4844	0	0	0	1.4844	0	0	0
UUGACC	1.4179	1.4232	1.465	0	0	0	1.465	0	0	0
UGGCCC	1.4297	1.4205	1.453	0	0	0	1.453	0	0	0
GAUCUU	1.4067	1.4276	1.4655	0	0	0	1.4655	0	0	0
GAUCCA	1.3964	1.4166	1.4848	0	0	0	1.4848	0	0	0
GGACUG	1.4761	1.42	1.4013	0	0	0	1.4013	0	0	0
GCGAUA	1.3682	1.4242	1.503	0	0	0	1.503	0	0	0
AUUUUC	1.4223	1.3988	1.4703	0	0	0	1.4703	0	0	0
UUCCUG	1.4111	1.4149	1.4577	0	0	0	1.4577	0	0	0
UUGCCC	1.4243	1.4166	1.4427	0	0	0	1.4427	0	0	0
AUUGGC	1.4325	1.4215	1.4236	0	0	0	1.4236	0	0	0
AUGUGC	1.4422	1.4188	1.4165	0	0	0	1.4165	0	0	0
CUUUUG	1.4081	1.4228	1.4442	0	0	0	1.4442	0	0	0
GGCCUG	1.4293	1.4251	1.4196	0	0	0	1.4196	0	0	0
CCAAUG	1.4132	1.4064	1.4513	0	0	0	1.4513	0	0	0
CUGCUG	1.4228	1.4106	1.4362	0	0	0	1.4362	0	0	0
UGCACC	1.4254	1.391	1.4497	0	0	0	1.4497	0	0	0
CCGCGA	1.4208	1.4023	1.4368	0	0	0	1.4368	0	0	0
UGACGC	1.4304	1.4055	1.4206	0	0	0	1.4206	0	0	0
GAUAGU	1.3925	1.4124	1.4482	0	0	0	1.4482	0	0	0
CCUUUG	1.3729	1.4277	1.4459	0	0	0	1.4459	0	0	0
AUUUUU	1.4163	1.3872	1.4406	0	0	0	1.4406	0	0	0
GACCCC	1.4263	1.3966	1.421	0	0	0	1.421	0	0	0
UUGCGC	1.4513	1.3851	1.4021	0	0	0	1.4021	0	0	0
AAGAUU	1.3777	1.3866	1.4734	0	0	0	1.4734	0	0	0
AUUUCU	1.3887	1.4105	1.4382	0	0	0	1.4382	0	0	0
AGACUG	1.4651	1.3988	1.3694	0	0	0	1.3694	0	0	0
AAAUUG	1.4463	1.3888	1.3968	0	0	0	1.3968	0	0	0
CCCCCG	1.4154	1.3902	1.417	0	0	0	1.417	0	0	0
GAAUUC	1.4341	1.3813	1.3972	0	0	0	1.3972	0	0	0
UUUCGA	1.3801	1.3937	1.4358	0	0	0	1.4358	0	0	0
GACUGU	1.4375	1.4069	1.3647	0	0	0	1.3647	0	0	0
GAUAUA	1.3177	1.3633	1.5265	0	0	0	1.5265	0	0	0
CGCCUG	1.4107	1.3964	1.3996	0	0	0	1.3996	0	0	0
AUCCGA	1.4054	1.3946	1.3977	0	0	0	1.3977	0	0	0
CAAAUG	1.4103	1.3659	1.4153	0	0	0	1.4153	0	0	0
ACCCCG	1.4064	1.3608	1.4097	0	0	0	1.4097	0	0	0
CACCGA	1.3994	1.3592	1.4181	0	0	0	1.4181	0	0	0
UGGCGA	1.4218	1.3815	1.3665	0	0	0	1.3665	0	0	0
CCACUG	1.4036	1.3646	1.3974	0	0	0	1.3974	0	0	0
GAACUG	1.4094	1.3968	1.359	0	0	0	1.359	0	0	0
ACUCGA	1.3945	1.3827	1.385	0	0	0	1.385	0	0	0
CUGCGA	1.3779	1.384	1.3974	0	0	0	1.3974	0	0	0
AUUCCG	1.3902	1.3618	1.406	0	0	0	1.406	0	0	0
GCCCGG	1.3833	1.3821	1.3915	0	0	0	1.3915	0	0	0
GCACUG	1.4051	1.3734	1.3763	0	0	0	1.3763	0	0	0
GACCCG	1.4075	1.3587	1.3817	0	0	0	1.3817	0	0	0
AUGCGA	1.3727	1.3695	1.4041	0	0	0	1.4041	0	0	0
GGCAUG	1.3864	1.389	1.369	0	0	0	1.369	0	0	0
UGACAU	1.3566	1.3791	1.4005	0	0	0	1.4005	0	0	0
CCCCCC	1.3915	1.3564	1.3873	0	0	0	1.3873	0	0	0
CGAAUG	1.4131	1.3685	1.3532	0	0	0	1.3532	0	0	0
UUGACU	1.3758	1.3765	1.3823	0	0	0	1.3823	0	0	0
CCACCC	1.4049	1.3311	1.3957	0	0	0	1.3957	0	0	0
GGCGAU	1.3591	1.3769	1.3933	0	0	0	1.3933	0	0	0
UAUGGC	1.4105	1.3748	1.3421	0	0	0	1.3421	0	0	0
GCCCCG	1.3784	1.3513	1.3897	0	0	0	1.3897	0	0	0
AUGAAU	1.4069	1.3517	1.3585	0	0	0	1.3585	0	0	0
AUGAGG	1.3901	1.383	1.3429	0	0	0	1.3429	0	0	0
AACCUG	1.3725	1.365	1.3782	0	0	0	1.3782	0	0	0
UUUGGC	1.3809	1.3517	1.3775	0	0	0	1.3775	0	0	0
GAGAAA	1.4241	1.3822	1.3019	0	0	0	1.3019	0	0	0
UUUGCC	1.3409	1.3637	1.4023	0	0	0	1.4023	0	0	0
UUGACG	1.3652	1.3665	1.3739	0	0	0	1.3739	0	0	0
UCACCC	1.3583	1.3278	1.4161	0	0	0	1.4161	0	0	0
GCCAUG	1.3709	1.3576	1.372	0	0	0	1.372	0	0	0
UGGCGC	1.3967	1.3465	1.3572	0	0	0	1.3572	0	0	0
CCGAUA	1.3151	1.3561	1.4254	0	0	0	1.4254	0	0	0
AUGCCC	1.3511	1.325	1.4203	0	0	0	1.4203	0	0	0
CGGUGA	1.3576	1.3862	1.35	0	0	0	1.35	0	0	0
CCUCGA	1.3551	1.3674	1.3683	0	0	0	1.3683	0	0	0
CCAGAU	1.3466	1.3404	1.3972	0	0	0	1.3972	0	0	0
GGCUUG	1.3608	1.3733	1.35	0	0	0	1.35	0	0	0
GACUGC	1.3703	1.3561	1.351	0	0	0	1.351	0	0	0
AAACUG	1.408	1.3361	1.3273	0	0	0	1.3273	0	0	0
UGCAUG	1.3719	1.342	1.3543	0	0	0	1.3543	0	0	0
UUCCGA	1.3609	1.3328	1.3734	0	0	0	1.3734	0	0	0
UAGAUU	1.299	1.3382	1.4287	0	0	0	1.4287	0	0	0
GAUCCU	1.3198	1.3556	1.3899	0	0	0	1.3899	0	0	0
CACCCC	1.3695	1.3011	1.3842	0	0	0	1.3842	0	0	0
UUUGCG	1.3701	1.3408	1.3424	0	0	0	1.3424	0	0	0
UUGGCA	1.3845	1.3088	1.356	0	0	0	1.356	0	0	0
CCACGA	1.3423	1.3364	1.3694	0	0	0	1.3694	0	0	0
AACCCG	1.3624	1.321	1.3552	0	0	0	1.3552	0	0	0
CAUUUG	1.3105	1.3453	1.3791	0	0	0	1.3791	0	0	0
CGGCUG	1.3589	1.3658	1.3095	0	0	0	1.3095	0	0	0
AGAGAU	1.3533	1.332	1.3464	0	0	0	1.3464	0	0	0
UGACCU	1.3184	1.3344	1.3785	0	0	0	1.3785	0	0	0
UUCAUG	1.3281	1.3256	1.3775	0	0	0	1.3775	0	0	0
CCCGGC	1.3354	1.3388	1.3555	0	0	0	1.3555	0	0	0
UCCUUG	1.3194	1.3526	1.3551	0	0	0	1.3551	0	0	0
UGUUUG	1.3649	1.3506	1.3111	0	0	0	1.3111	0	0	0
CCCGAC	1.3574	1.319	1.3498	0	0	0	1.3498	0	0	0
CACCCU	1.3559	1.3166	1.3518	0	0	0	1.3518	0	0	0
GCUCGA	1.3817	1.3112	1.3308	0	0	0	1.3308	0	0	0
UGCGCC	1.3409	1.3189	1.3591	0	0	0	1.3591	0	0	0
UGACAG	1.3393	1.3425	1.3366	0	0	0	1.3366	0	0	0
CGCUUG	1.3239	1.3513	1.3426	0	0	0	1.3426	0	0	0
AGCCUG	1.3261	1.3334	1.358	0	0	0	1.358	0	0	0
AUGUGG	1.3737	1.3352	1.3081	0	0	0	1.3081	0	0	0
GAAGAU	1.3474	1.3425	1.3265	0	0	0	1.3265	0	0	0
CGAUAA	1.2741	1.3276	1.4131	0	0	0	1.4131	0	0	0
UCCCGA	1.34	1.3275	1.347	0	0	0	1.347	0	0	0
AACUUG	1.3618	1.3272	1.3249	0	0	0	1.3249	0	0	0
CUCUUG	1.3269	1.3424	1.3434	0	0	0	1.3434	0	0	0
CUGUAG	1.3177	1.3679	1.3228	0	0	0	1.3228	0	0	0
GGGUGA	1.3443	1.3394	1.3215	0	0	0	1.3215	0	0	0
GAUCUC	1.3166	1.3143	1.3723	0	0	0	1.3723	0	0	0
GAUCAC	1.3127	1.2949	1.3931	0	0	0	1.3931	0	0	0
CCCGCG	1.3412	1.307	1.3521	0	0	0	1.3521	0	0	0
UAUUGC	1.3963	1.3263	1.271	0	0	0	1.271	0	0	0
GCGCCC	1.3295	1.3081	1.3559	0	0	0	1.3559	0	0	0
AUGCGC	1.3354	1.3079	1.3499	0	0	0	1.3499	0	0	0
UGGCAG	1.366	1.3256	1.2976	0	0	0	1.2976	0	0	0
CUUGGC	1.3389	1.313	1.3357	0	0	0	1.3357	0	0	0
UCCGAG	1.3443	1.3303	1.312	0	0	0	1.312	0	0	0
CCUGAC	1.3174	1.3286	1.3405	0	0	0	1.3405	0	0	0
UGAAGA	1.3467	1.348	1.2904	0	0	0	1.2904	0	0	0
AUGGUG	1.3279	1.3215	1.3354	0	0	0	1.3354	0	0	0
CGAUAC	1.262	1.3361	1.3861	0	0	0	1.3861	0	0	0
AGGUGA	1.3233	1.3509	1.3096	0	0	0	1.3096	0	0	0
GACACU	1.3371	1.3124	1.3342	0	0	0	1.3342	0	0	0
CCGCUG	1.3182	1.3207	1.3418	0	0	0	1.3418	0	0	0
AUCUUG	1.3067	1.3368	1.3372	0	0	0	1.3372	0	0	0
AUGGGA	1.344	1.3403	1.295	0	0	0	1.295	0	0	0
ACCCGC	1.3224	1.2889	1.3629	0	0	0	1.3629	0	0	0
CUCGAG	1.3488	1.3161	1.3051	0	0	0	1.3051	0	0	0
GACGCC	1.3167	1.3088	1.3441	0	0	0	1.3441	0	0	0
GCGCUG	1.3477	1.311	1.3062	0	0	0	1.3062	0	0	0
CCUCUG	1.3144	1.3162	1.3337	0	0	0	1.3337	0	0	0
GCAGAU	1.3121	1.3172	1.334	0	0	0	1.334	0	0	0
AAUGGC	1.3729	1.297	1.2915	0	0	0	1.2915	0	0	0
UGAGUG	1.3511	1.321	1.2893	0	0	0	1.2893	0	0	0
GCUCUG	1.3315	1.3068	1.3211	0	0	0	1.3211	0	0	0
UAGUGA	1.3028	1.3208	1.3308	0	0	0	1.3308	0	0	0
CCGGGA	1.367	1.2904	1.2922	0	0	0	1.2922	0	0	0
GCUGUG	1.3233	1.342	1.2838	0	0	0	1.2838	0	0	0
AGAAUU	1.3506	1.3083	1.2858	0	0	0	1.2858	0	0	0
UUGAGA	1.3097	1.3248	1.3077	0	0	0	1.3077	0	0	0
UGAACC	1.3329	1.2977	1.3057	0	0	0	1.3057	0	0	0
UGAGCC	1.3233	1.3009	1.3117	0	0	0	1.3117	0	0	0
UGCCCC	1.3036	1.3033	1.328	0	0	0	1.328	0	0	0
UGCCGA	1.3134	1.2991	1.3218	0	0	0	1.3218	0	0	0
CCCGUG	1.3243	1.2893	1.3196	0	0	0	1.3196	0	0	0
ACUUUG	1.3136	1.305	1.3133	0	0	0	1.3133	0	0	0
GUUUUG	1.3008	1.3231	1.3037	0	0	0	1.3037	0	0	0
CUCCGA	1.2962	1.3044	1.3258	0	0	0	1.3258	0	0	0
CAUCCG	1.2935	1.3117	1.3174	0	0	0	1.3174	0	0	0
UGGAUG	1.3025	1.3234	1.2957	0	0	0	1.2957	0	0	0
GGCCCG	1.3092	1.298	1.3111	0	0	0	1.3111	0	0	0
UGUAGA	1.3001	1.3266	1.2914	0	0	0	1.2914	0	0	0
UUGCAC	1.3212	1.2879	1.3065	0	0	0	1.3065	0	0	0
GGGCUG	1.3196	1.3115	1.2837	0	0	0	1.2837	0	0	0
AUGGGG	1.3419	1.2959	1.2743	0	0	0	1.2743	0	0	0
ACCCAG	1.3156	1.2688	1.3203	0	0	0	1.3203	0	0	0
UGAAAA	1.3712	1.2816	1.2465	0	0	0	1.2465	0	0	0
GAGAAC	1.3412	1.3022	1.2537	0	0	0	1.2537	0	0	0
GAACCC	1.3129	1.2847	1.2975	0	0	0	1.2975	0	0	0
CAACUG	1.3256	1.2756	1.2938	0	0	0	1.2938	0	0	0
AUUUCA	1.292	1.2554	1.347	0	0	0	1.347	0	0	0
CCCUGG	1.2645	1.3139	1.314	0	0	0	1.314	0	0	0
GCGAGA	1.3131	1.3153	1.2625	0	0	0	1.2625	0	0	0
GCAUUG	1.3022	1.2872	1.2993	0	0	0	1.2993	0	0	0
UCCCUG	1.2842	1.2911	1.3111	0	0	0	1.3111	0	0	0
ACGAUA	1.2138	1.2977	1.3726	0	0	0	1.3726	0	0	0
CCAAGA	1.3254	1.2681	1.2896	0	0	0	1.2896	0	0	0
AGCCCG	1.3122	1.2772	1.2916	0	0	0	1.2916	0	0	0
GACUGG	1.3251	1.2916	1.2609	0	0	0	1.2609	0	0	0
GCUAUU	1.3622	1.2742	1.2368	0	0	0	1.2368	0	0	0
UUUGCU	1.2753	1.2972	1.2954	0	0	0	1.2954	0	0	0
CAAGAU	1.2492	1.2716	1.3457	0	0	0	1.3457	0	0	0
CCCGCC	1.2804	1.2627	1.3215	0	0	0	1.3215	0	0	0
UGAGAC	1.3051	1.2919	1.2601	0	0	0	1.2601	0	0	0
AGACAC	1.3123	1.2604	1.2815	0	0	0	1.2815	0	0	0
UGACUU	1.2643	1.2885	1.3007	0	0	0	1.3007	0	0	0
AACACC	1.3021	1.2483	1.3009	0	0	0	1.3009	0	0	0
UGACAA	1.2996	1.2595	1.2907	0	0	0	1.2907	0	0	0
UGGCCU	1.3054	1.2747	1.268	0	0	0	1.268	0	0	0
GGGAUG	1.2971	1.2785	1.2673	0	0	0	1.2673	0	0	0
GGUUUG	1.2824	1.3198	1.2407	0	0	0	1.2407	0	0	0
AUGGGC	1.2716	1.2916	1.2771	0	0	0	1.2771	0	0	0
GAGAGA	1.3157	1.2866	1.2357	0	0	0	1.2357	0	0	0
AUCCUG	1.2762	1.2713	1.2896	0	0	0	1.2896	0	0	0
GAGCUG	1.2817	1.2872	1.2668	0	0	0	1.2668	0	0	0
GAAUUU	1.2857	1.2777	1.2702	0	0	0	1.2702	0	0	0
UUGCGG	1.3016	1.2739	1.2578	0	0	0	1.2578	0	0	0
CCCAGG	1.2816	1.2726	1.279	0	0	0	1.279	0	0	0
CACUCG	1.2876	1.264	1.2813	0	0	0	1.2813	0	0	0
UUUUGC	1.2513	1.2765	1.3015	0	0	0	1.3015	0	0	0
UUCACC	1.2521	1.2434	1.3326	0	0	0	1.3326	0	0	0
UGAAAC	1.3019	1.2716	1.2506	0	0	0	1.2506	0	0	0
UUGCCU	1.2625	1.2626	1.2984	0	0	0	1.2984	0	0	0
GAUCAA	1.2434	1.2547	1.3249	0	0	0	1.3249	0	0	0
CCCAAG	1.2849	1.2511	1.2846	0	0	0	1.2846	0	0	0
UUGGCC	1.2852	1.2541	1.2805	0	0	0	1.2805	0	0	0
CCUGGG	1.2494	1.2894	1.2793	0	0	0	1.2793	0	0	0
CUGUUG	1.2785	1.2713	1.2659	0	0	0	1.2659	0	0	0
ACACCU	1.2755	1.2496	1.289	0	0	0	1.289	0	0	0
UGCAGA	1.2835	1.2834	1.2451	0	0	0	1.2451	0	0	0
GACCGA	1.2815	1.2639	1.2658	0	0	0	1.2658	0	0	0
ACACUG	1.2861	1.2493	1.2736	0	0	0	1.2736	0	0	0
UCUUUG	1.2508	1.2629	1.2884	0	0	0	1.2884	0	0	0
AUUAUG	1.2253	1.2691	1.3073	0	0	0	1.3073	0	0	0
UGAGAG	1.3013	1.2638	1.2342	0	0	0	1.2342	0	0	0
GAGAAG	1.3222	1.2711	1.2034	0	0	0	1.2034	0	0	0
GCCCCC	1.2734	1.2501	1.2711	0	0	0	1.2711	0	0	0
GGCCCC	1.2642	1.251	1.2788	0	0	0	1.2788	0	0	0
UGAAUU	1.2747	1.258	1.2582	0	0	0	1.2582	0	0	0
CCCCAG	1.2558	1.2519	1.2828	0	0	0	1.2828	0	0	0
UGACCA	1.2681	1.2483	1.2728	0	0	0	1.2728	0	0	0
UUUCCG	1.2466	1.2466	1.2951	0	0	0	1.2951	0	0	0
UGCGCU	1.2737	1.2529	1.2603	0	0	0	1.2603	0	0	0
UCGUGA	1.2603	1.262	1.2626	0	0	0	1.2626	0	0	0
GCACCU	1.2653	1.2421	1.2774	0	0	0	1.2774	0	0	0
ACCAUG	1.2693	1.2451	1.2663	0	0	0	1.2663	0	0	0
UCCCCG	1.2623	1.2454	1.2704	0	0	0	1.2704	0	0	0
ACUGUG	1.2831	1.2636	1.2312	0	0	0	1.2312	0	0	0
CUGACA	1.2641	1.2512	1.2623	0	0	0	1.2623	0	0	0
CUAUGG	1.3033	1.2476	1.2251	0	0	0	1.2251	0	0	0
CUUCUG	1.2406	1.2627	1.2727	0	0	0	1.2727	0	0	0
AGCACC	1.2855	1.2209	1.2694	0	0	0	1.2694	0	0	0
UACCCG	1.2697	1.2436	1.2622	0	0	0	1.2622	0	0	0
UGGCAU	1.266	1.2702	1.2346	0	0	0	1.2346	0	0	0
AACCGA	1.2715	1.245	1.2537	0	0	0	1.2537	0	0	0
CUUGAG	1.2471	1.2769	1.2448	0	0	0	1.2448	0	0	0
CUUCGA	1.2375	1.2525	1.2768	0	0	0	1.2768	0	0	0
ACGAGA	1.2838	1.2507	1.2297	0	0	0	1.2297	0	0	0
UGCGGC	1.2854	1.237	1.2408	0	0	0	1.2408	0	0	0
GGCUGU	1.28	1.2652	1.2172	0	0	0	1.2172	0	0	0
GCCCGC	1.2424	1.2341	1.2837	0	0	0	1.2837	0	0	0
CCGAGC	1.2728	1.2368	1.2505	0	0	0	1.2505	0	0	0
AAAGAU	1.2527	1.238	1.266	0	0	0	1.266	0	0	0
GAACGA	1.2867	1.2559	1.2134	0	0	0	1.2134	0	0	0
GUGCUG	1.2762	1.2525	1.2209	0	0	0	1.2209	0	0	0
AAUUGC	1.249	1.2487	1.2506	0	0	0	1.2506	0	0	0
ACGCCC	1.2516	1.2354	1.2612	0	0	0	1.2612	0	0	0
CCGAGG	1.2969	1.235	1.216	0	0	0	1.216	0	0	0
CACACC	1.2627	1.2033	1.2817	0	0	0	1.2817	0	0	0
UCCAUG	1.2574	1.2272	1.2627	0	0	0	1.2627	0	0	0
CCUGGA	1.2434	1.2651	1.2385	0	0	0	1.2385	0	0	0
CCUUGC	1.2224	1.2561	1.267	0	0	0	1.267	0	0	0
CCGCCC	1.2429	1.2166	1.2829	0	0	0	1.2829	0	0	0
GCGCGA	1.2551	1.2394	1.2472	0	0	0	1.2472	0	0	0
CCCACC	1.2418	1.2147	1.2843	0	0	0	1.2843	0	0	0
AUUCCA	1.2476	1.2237	1.269	0	0	0	1.269	0	0	0
CGACAC	1.2639	1.2202	1.2557	0	0	0	1.2557	0	0	0
UUUGAG	1.2317	1.2743	1.2318	0	0	0	1.2318	0	0	0
AGCUUG	1.2594	1.2438	1.2336	0	0	0	1.2336	0	0	0
UGCGGG	1.2681	1.2452	1.2232	0	0	0	1.2232	0	0	0
UCAUUG	1.2268	1.2422	1.2654	0	0	0	1.2654	0	0	0
UCUCUG	1.2467	1.2551	1.2284	0	0	0	1.2284	0	0	0
CUGGGA	1.2339	1.2637	1.2289	0	0	0	1.2289	0	0	0
AUGGAG	1.2456	1.2491	1.2318	0	0	0	1.2318	0	0	0
AUUCAC	1.2296	1.2107	1.2858	0	0	0	1.2858	0	0	0
UGCGGA	1.2841	1.235	1.2066	0	0	0	1.2066	0	0	0
GUUCUG	1.2517	1.2538	1.2193	0	0	0	1.2193	0	0	0
UUUUGG	1.234	1.2384	1.2504	0	0	0	1.2504	0	0	0
CUGACC	1.2324	1.2242	1.2661	0	0	0	1.2661	0	0	0
UGGAGA	1.2337	1.2634	1.2254	0	0	0	1.2254	0	0	0
GAGCCC	1.2531	1.2324	1.2348	0	0	0	1.2348	0	0	0
AGAGAA	1.2843	1.242	1.1908	0	0	0	1.1908	0	0	0
ACCCCC	1.2532	1.2172	1.2463	0	0	0	1.2463	0	0	0
AUGCCU	1.1859	1.2232	1.3066	0	0	0	1.3066	0	0	0
UGAAAU	1.2782	1.2194	1.2171	0	0	0	1.2171	0	0	0
ACAGAU	1.2244	1.2135	1.2763	0	0	0	1.2763	0	0	0
UGGCCA	1.2551	1.2224	1.236	0	0	0	1.236	0	0	0
UGGGAA	1.2429	1.2561	1.2135	0	0	0	1.2135	0	0	0
AUUCUU	1.2188	1.2365	1.257	0	0	0	1.257	0	0	0
AGGCUG	1.2522	1.2529	1.202	0	0	0	1.202	0	0	0
UGCUGC	1.217	1.2389	1.2508	0	0	0	1.2508	0	0	0
GAGCGA	1.248	1.2482	1.2091	0	0	0	1.2091	0	0	0
UUGCCA	1.2347	1.2289	1.2411	0	0	0	1.2411	0	0	0
CUUGCC	1.2021	1.2381	1.2641	0	0	0	1.2641	0	0	0
GGUAUG	1.239	1.2397	1.2254	0	0	0	1.2254	0	0	0
CCUUGG	1.2163	1.2512	1.2349	0	0	0	1.2349	0	0	0
AUUGUG	1.2105	1.2439	1.2474	0	0	0	1.2474	0	0	0
CUCAUG	1.2328	1.2117	1.2567	0	0	0	1.2567	0	0	0
CCUGAA	1.2345	1.2384	1.2259	0	0	0	1.2259	0	0	0
CGGACU	1.2714	1.2033	1.2218	0	0	0	1.2218	0	0	0
UGGCCG	1.2553	1.2111	1.2297	0	0	0	1.2297	0	0	0
CAGCUG	1.2375	1.2201	1.2385	0	0	0	1.2385	0	0	0
UUUGUG	1.2081	1.2523	1.2346	0	0	0	1.2346	0	0	0
UGCUGG	1.2476	1.2203	1.2264	0	0	0	1.2264	0	0	0
UGGCAA	1.2529	1.2159	1.2232	0	0	0	1.2232	0	0	0
AGACCC	1.2426	1.2267	1.2225	0	0	0	1.2225	0	0	0
UGCGUG	1.229	1.2373	1.2253	0	0	0	1.2253	0	0	0
GAUCAG	1.2068	1.2253	1.2593	0	0	0	1.2593	0	0	0
GUAGAA	1.2684	1.2306	1.1908	0	0	0	1.1908	0	0	0
CCCCGC	1.2179	1.2094	1.2606	0	0	0	1.2606	0	0	0
CUGACG	1.2329	1.2375	1.2174	0	0	0	1.2174	0	0	0
CCUGCG	1.2057	1.2235	1.2584	0	0	0	1.2584	0	0	0
CGGGAA	1.2659	1.229	1.1923	0	0	0	1.1923	0	0	0
AUUGAG	1.232	1.241	1.2136	0	0	0	1.2136	0	0	0
CCGAAA	1.2764	1.2103	1.1978	0	0	0	1.1978	0	0	0
CCGAGU	1.2736	1.2132	1.1976	0	0	0	1.1976	0	0	0
GAUCUA	1.1871	1.2262	1.2706	0	0	0	1.2706	0	0	0
UCGAUA	1.1656	1.2275	1.2892	0	0	0	1.2892	0	0	0
CGCAUG	1.233	1.217	1.2279	0	0	0	1.2279	0	0	0
AUGUCC	1.2164	1.2194	1.2418	0	0	0	1.2418	0	0	0
UUGGCG	1.21	1.2463	1.221	0	0	0	1.221	0	0	0
UUUUCC	1.1873	1.2035	1.2861	0	0	0	1.2861	0	0	0
AAUGAC	1.1945	1.2289	1.2525	0	0	0	1.2525	0	0	0
GCUGAC	1.2149	1.2314	1.2266	0	0	0	1.2266	0	0	0
UGCUAU	1.2739	1.2026	1.1963	0	0	0	1.1963	0	0	0
CUUGCG	1.2069	1.2364	1.2295	0	0	0	1.2295	0	0	0
CUCCUG	1.2082	1.2227	1.2412	0	0	0	1.2412	0	0	0
CAUCUG	1.217	1.2221	1.2328	0	0	0	1.2328	0	0	0
UCGAGA	1.2476	1.221	1.2015	0	0	0	1.2015	0	0	0
UUCCGG	1.2227	1.2225	1.2246	0	0	0	1.2246	0	0	0
CCUGUG	1.1973	1.229	1.2429	0	0	0	1.2429	0	0	0
CGAUCC	1.192	1.219	1.2577	0	0	0	1.2577	0	0	0
CUGCCC	1.2064	1.2083	1.254	0	0	0	1.254	0	0	0
CGAGAC	1.2577	1.2124	1.1974	0	0	0	1.1974	0	0	0
CAGAGA	1.2507	1.2121	1.2036	0	0	0	1.2036	0	0	0
UUGGUG	1.2218	1.2443	1.2	0	0	0	1.2	0	0	0
GCCCAG	1.2195	1.2052	1.2403	0	0	0	1.2403	0	0	0
GCCUGC	1.2042	1.2059	1.2545	0	0	0	1.2545	0	0	0
UGACCG	1.2229	1.2297	1.2118	0	0	0	1.2118	0	0	0
UGCGAG	1.2322	1.2371	1.1944	0	0	0	1.1944	0	0	0
GAAGUG	1.256	1.2185	1.189	0	0	0	1.189	0	0	0
CGACCC	1.2301	1.2033	1.2301	0	0	0	1.2301	0	0	0
GCACGA	1.2259	1.2124	1.2246	0	0	0	1.2246	0	0	0
ACCGAG	1.2487	1.2103	1.2037	0	0	0	1.2037	0	0	0
CAGCGA	1.2134	1.2095	1.239	0	0	0	1.239	0	0	0
CCUCCG	1.1864	1.2029	1.2722	0	0	0	1.2722	0	0	0
AUUCGG	1.2126	1.2324	1.2159	0	0	0	1.2159	0	0	0
CGCACC	1.2228	1.1837	1.2543	0	0	0	1.2543	0	0	0
CCAGAG	1.2403	1.2119	1.2067	0	0	0	1.2067	0	0	0
GAAAGA	1.2666	1.2259	1.1623	0	0	0	1.1623	0	0	0
UGAAGC	1.2312	1.2219	1.2016	0	0	0	1.2016	0	0	0
UCCCCC	1.2125	1.2077	1.2335	0	0	0	1.2335	0	0	0
UAAUUG	1.236	1.2009	1.2165	0	0	0	1.2165	0	0	0
UGGCGG	1.235	1.2369	1.1795	0	0	0	1.1795	0	0	0
AUGCAC	1.2186	1.1879	1.2411	0	0	0	1.2411	0	0	0
CUGGCA	1.2137	1.2112	1.2189	0	0	0	1.2189	0	0	0
AUUCCU	1.1889	1.2012	1.2517	0	0	0	1.2517	0	0	0
UGAAAG	1.2659	1.2099	1.1651	0	0	0	1.1651	0	0	0
GGCUGC	1.2119	1.2373	1.1906	0	0	0	1.1906	0	0	0
UUGCAG	1.218	1.2253	1.1932	0	0	0	1.1932	0	0	0
CCGGGG	1.2208	1.1974	1.2181	0	0	0	1.2181	0	0	0
GCAAUU	1.2083	1.1977	1.2262	0	0	0	1.2262	0	0	0
CCAGAA	1.2504	1.193	1.1871	0	0	0	1.1871	0	0	0
CCUGCC	1.1832	1.203	1.2437	0	0	0	1.2437	0	0	0
UUGGCU	1.2012	1.2188	1.2097	0	0	0	1.2097	0	0	0
GAAACC	1.2333	1.1948	1.2011	0	0	0	1.2011	0	0	0
GAAAUU	1.2263	1.2003	1.2001	0	0	0	1.2001	0	0	0
CCUGGC	1.1776	1.2058	1.2429	0	0	0	1.2429	0	0	0
CUGGCC	1.1896	1.2039	1.2299	0	0	0	1.2299	0	0	0
UGGGUG	1.2001	1.2224	1.1988	0	0	0	1.1988	0	0	0
CCCACG	1.1891	1.2007	1.2261	0	0	0	1.2261	0	0	0
GAAAAA	1.2676	1.1869	1.1613	0	0	0	1.1613	0	0	0
GCUGGC	1.2117	1.2062	1.1972	0	0	0	1.1972	0	0	0
CGCCCA	1.1971	1.1839	1.2334	0	0	0	1.2334	0	0	0
CCCAAA	1.2218	1.1799	1.2113	0	0	0	1.2113	0	0	0
GACGUG	1.2283	1.1995	1.1851	0	0	0	1.1851	0	0	0
GGAGUG	1.2279	1.2076	1.1747	0	0	0	1.1747	0	0	0
CCCGGU	1.1854	1.2098	1.2147	0	0	0	1.2147	0	0	0
UUCUGC	1.187	1.207	1.2156	0	0	0	1.2156	0	0	0
UUCCCG	1.1837	1.1935	1.2263	0	0	0	1.2263	0	0	0
AUUGGG	1.2049	1.2064	1.192	0	0	0	1.192	0	0	0
ACUCUG	1.2093	1.1896	1.204	0	0	0	1.204	0	0	0
CGAUAU	1.1197	1.2013	1.2809	0	0	0	1.2809	0	0	0
AUGGGU	1.2	1.214	1.1876	0	0	0	1.1876	0	0	0
CUGACU	1.2001	1.2054	1.1952	0	0	0	1.1952	0	0	0
GAAGAA	1.2535	1.2161	1.1302	0	0	0	1.1302	0	0	0
GAGACC	1.2182	1.2056	1.1752	0	0	0	1.1752	0	0	0
CCUAGA	1.2152	1.196	1.1855	0	0	0	1.1855	0	0	0
GGGAAU	1.2275	1.2001	1.1686	0	0	0	1.1686	0	0	0
GGAUUG	1.2228	1.2184	1.1546	0	0	0	1.1546	0	0	0
AGCAUG	1.1989	1.1939	1.2028	0	0	0	1.2028	0	0	0
UGUGCC	1.1785	1.2114	1.2028	0	0	0	1.2028	0	0	0
ACCCAA	1.2065	1.1733	1.2123	0	0	0	1.2123	0	0	0
CUCCGG	1.1843	1.1965	1.2111	0	0	0	1.2111	0	0	0
UGAGCU	1.199	1.2063	1.1865	0	0	0	1.1865	0	0	0
UCACUG	1.2075	1.187	1.1954	0	0	0	1.1954	0	0	0
UUCUGG	1.1747	1.2342	1.1797	0	0	0	1.1797	0	0	0
CUAGAU	1.1593	1.1911	1.2381	0	0	0	1.2381	0	0	0
GAGACU	1.2335	1.199	1.1554	0	0	0	1.1554	0	0	0
UCCGGG	1.1903	1.2098	1.187	0	0	0	1.187	0	0	0
CGCCCC	1.1918	1.1772	1.2164	0	0	0	1.2164	0	0	0
CGAGUG	1.1986	1.2034	1.1829	0	0	0	1.1829	0	0	0
ACAAUG	1.1899	1.1734	1.2214	0	0	0	1.2214	0	0	0
CUGGCG	1.1901	1.1937	1.1997	0	0	0	1.1997	0	0	0
UGACUC	1.1958	1.1997	1.1874	0	0	0	1.1874	0	0	0
CCGAUC	1.1917	1.1697	1.2215	0	0	0	1.2215	0	0	0
CGGAUG	1.2151	1.1832	1.1836	0	0	0	1.1836	0	0	0
ACCUGG	1.1781	1.213	1.1902	0	0	0	1.1902	0	0	0
AUUCUC	1.1755	1.1834	1.2214	0	0	0	1.2214	0	0	0
GGAGAA	1.2411	1.2028	1.1358	0	0	0	1.1358	0	0	0
GGCCGA	1.2004	1.1998	1.179	0	0	0	1.179	0	0	0
GACAUC	1.1743	1.1924	1.212	0	0	0	1.212	0	0	0
AAUCUG	1.211	1.1823	1.185	0	0	0	1.185	0	0	0
GACAGA	1.2127	1.1908	1.1745	0	0	0	1.1745	0	0	0
AGGAUG	1.2182	1.1827	1.1759	0	0	0	1.1759	0	0	0
CCGGAA	1.2226	1.1832	1.17	0	0	0	1.17	0	0	0
UCCCGG	1.2017	1.1851	1.1875	0	0	0	1.1875	0	0	0
GAGUUG	1.2128	1.1824	1.179	0	0	0	1.179	0	0	0
UGCGAC	1.2102	1.1838	1.18	0	0	0	1.18	0	0	0
AUGUAG	1.1912	1.1983	1.1845	0	0	0	1.1845	0	0	0
UUUCCC	1.1591	1.1811	1.2337	0	0	0	1.2337	0	0	0
UGCGCG	1.2021	1.1804	1.189	0	0	0	1.189	0	0	0
GGCGCC	1.1885	1.1854	1.1975	0	0	0	1.1975	0	0	0
ACGCGA	1.1902	1.1816	1.1984	0	0	0	1.1984	0	0	0
AUGGAA	1.2047	1.1943	1.1705	0	0	0	1.1705	0	0	0
GAGAUA	1.1588	1.2162	1.1942	0	0	0	1.1942	0	0	0
GCCACC	1.1901	1.1581	1.2207	0	0	0	1.2207	0	0	0
AAGAGA	1.2137	1.1968	1.1568	0	0	0	1.1568	0	0	0
UGGUUG	1.187	1.2045	1.172	0	0	0	1.172	0	0	0
GAGACA	1.2062	1.1912	1.165	0	0	0	1.165	0	0	0
GAAAAG	1.24	1.1944	1.1269	0	0	0	1.1269	0	0	0
UUCGCG	1.1998	1.1743	1.1853	0	0	0	1.1853	0	0	0
UGCCCA	1.1784	1.1602	1.2193	0	0	0	1.2193	0	0	0
UUGCUU	1.1725	1.1854	1.1987	0	0	0	1.1987	0	0	0
UUGCCG	1.1586	1.1984	1.1984	0	0	0	1.1984	0	0	0
GUAAUG	1.2275	1.1852	1.142	0	0	0	1.142	0	0	0
AUGAGU	1.1907	1.1923	1.1711	0	0	0	1.1711	0	0	0
UUCCCC	1.1561	1.1999	1.197	0	0	0	1.197	0	0	0
CUCCCC	1.1839	1.1622	1.2038	0	0	0	1.2038	0	0	0
ACAUUG	1.185	1.165	1.1998	0	0	0	1.1998	0	0	0
AUUCAG	1.1786	1.1532	1.2167	0	0	0	1.2167	0	0	0
GAUCGA	1.1845	1.1726	1.1906	0	0	0	1.1906	0	0	0
AGAACC	1.2061	1.1802	1.1613	0	0	0	1.1613	0	0	0
UGAGGC	1.1866	1.194	1.167	0	0	0	1.167	0	0	0
UGGGAG	1.1911	1.201	1.1549	0	0	0	1.1549	0	0	0
CCUAUG	1.1775	1.1713	1.1982	0	0	0	1.1982	0	0	0
CUGGUG	1.1675	1.2096	1.1696	0	0	0	1.1696	0	0	0
AUAGCG	1.1898	1.1853	1.1709	0	0	0	1.1709	0	0	0
CGAGAG	1.2068	1.1922	1.1469	0	0	0	1.1469	0	0	0
GCUGAG	1.2124	1.1794	1.1533	0	0	0	1.1533	0	0	0
UCUCGA	1.1786	1.1754	1.1909	0	0	0	1.1909	0	0	0
AUGCCG	1.1679	1.1621	1.2129	0	0	0	1.2129	0	0	0
UGGCUC	1.1873	1.181	1.1745	0	0	0	1.1745	0	0	0
GGAAUU	1.1932	1.1899	1.1594	0	0	0	1.1594	0	0	0
UGGCUA	1.2073	1.1735	1.1581	0	0	0	1.1581	0	0	0
GACCCA	1.1707	1.1697	1.1982	0	0	0	1.1982	0	0	0
AAACGA	1.1951	1.1716	1.1708	0	0	0	1.1708	0	0	0
UGCUGU	1.1607	1.2023	1.1738	0	0	0	1.1738	0	0	0
UGAGGA	1.2125	1.1876	1.1343	0	0	0	1.1343	0	0	0
UGAGCG	1.1804	1.1927	1.1606	0	0	0	1.1606	0	0	0
AUGCGG	1.1696	1.1823	1.1813	0	0	0	1.1813	0	0	0
AUGCCA	1.1497	1.1526	1.2306	0	0	0	1.2306	0	0	0
UCUGGC	1.1827	1.1825	1.1666	0	0	0	1.1666	0	0	0
UUCGAG	1.1755	1.192	1.164	0	0	0	1.164	0	0	0
AUGGAC	1.1793	1.1662	1.1859	0	0	0	1.1859	0	0	0
CCCCCU	1.1869	1.1658	1.1764	0	0	0	1.1764	0	0	0
UUGAGC	1.1654	1.194	1.1686	0	0	0	1.1686	0	0	0
ACUGAC	1.1827	1.1632	1.182	0	0	0	1.182	0	0	0
UGUAUG	1.1839	1.1772	1.1656	0	0	0	1.1656	0	0	0
AUUUGU	1.1858	1.1804	1.1586	0	0	0	1.1586	0	0	0
GCACCG	1.1786	1.1529	1.1931	0	0	0	1.1931	0	0	0
UUGCUC	1.1792	1.1784	1.1646	0	0	0	1.1646	0	0	0
CCCUGC	1.1623	1.1628	1.1969	0	0	0	1.1969	0	0	0
GACACG	1.1822	1.1672	1.1718	0	0	0	1.1718	0	0	0
UGUGCU	1.1741	1.1694	1.175	0	0	0	1.175	0	0	0
CGAAGA	1.2081	1.1786	1.1284	0	0	0	1.1284	0	0	0
GAAAAC	1.2268	1.162	1.126	0	0	0	1.126	0	0	0
GAAUGC	1.1703	1.1776	1.1658	0	0	0	1.1658	0	0	0
ACCUGC	1.127	1.1724	1.2133	0	0	0	1.2133	0	0	0
UGAGCA	1.1662	1.1857	1.1608	0	0	0	1.1608	0	0	0
AGAAGA	1.2211	1.1838	1.1046	0	0	0	1.1046	0	0	0
AAGCUG	1.1842	1.1686	1.1566	0	0	0	1.1566	0	0	0
UGUGAC	1.1705	1.1801	1.1588	0	0	0	1.1588	0	0	0
UUCCGC	1.1455	1.1613	1.2019	0	0	0	1.2019	0	0	0
UGUCUG	1.1732	1.1795	1.1525	0	0	0	1.1525	0	0	0
CUUGAA	1.1812	1.1692	1.154	0	0	0	1.154	0	0	0
GACUCC	1.1691	1.1662	1.1689	0	0	0	1.1689	0	0	0
UGACGG	1.1727	1.1888	1.1417	0	0	0	1.1417	0	0	0
CCGAAG	1.1868	1.1736	1.1427	0	0	0	1.1427	0	0	0
GACGAG	1.1888	1.1815	1.1318	0	0	0	1.1318	0	0	0
ACUGAG	1.1815	1.1866	1.1334	0	0	0	1.1334	0	0	0
GGAGAU	1.1548	1.1813	1.1622	0	0	0	1.1622	0	0	0
AGAUUA	1.0922	1.1586	1.2469	0	0	0	1.2469	0	0	0
UGUGUG	1.1449	1.1912	1.161	0	0	0	1.161	0	0	0
AUUGGU	1.1719	1.1761	1.1485	0	0	0	1.1485	0	0	0
AGCCGA	1.1599	1.17	1.1661	0	0	0	1.1661	0	0	0
AUGCAG	1.1491	1.1613	1.1824	0	0	0	1.1824	0	0	0
CACAUG	1.1667	1.1329	1.1914	0	0	0	1.1914	0	0	0
AAAAGA	1.2035	1.1522	1.1346	0	0	0	1.1346	0	0	0
AACAUG	1.1809	1.1314	1.1777	0	0	0	1.1777	0	0	0
AAACCC	1.1718	1.1462	1.172	0	0	0	1.172	0	0	0
CGAUCU	1.1477	1.1525	1.1892	0	0	0	1.1892	0	0	0
AGAACU	1.1811	1.1632	1.1437	0	0	0	1.1437	0	0	0
GGCACU	1.1721	1.1552	1.1607	0	0	0	1.1607	0	0	0
GAAUCC	1.1794	1.1606	1.1479	0	0	0	1.1479	0	0	0
GCCAGA	1.1673	1.1618	1.1579	0	0	0	1.1579	0	0	0
CCGGAC	1.1745	1.1496	1.1627	0	0	0	1.1627	0	0	0
CUGCAG	1.174	1.1633	1.1484	0	0	0	1.1484	0	0	0
GAACUC	1.1603	1.1636	1.1616	0	0	0	1.1616	0	0	0
AUUCAA	1.1569	1.1268	1.2016	0	0	0	1.2016	0	0	0
UGGGGC	1.161	1.1724	1.1508	0	0	0	1.1508	0	0	0
CCACCG	1.15	1.1369	1.1966	0	0	0	1.1966	0	0	0
CCCAGC	1.1435	1.1373	1.201	0	0	0	1.201	0	0	0
CAACGA	1.1491	1.155	1.1774	0	0	0	1.1774	0	0	0
CGACGA	1.1793	1.1567	1.1447	0	0	0	1.1447	0	0	0
UGGCUU	1.1509	1.1667	1.1608	0	0	0	1.1608	0	0	0
UCUGUG	1.1489	1.1699	1.1592	0	0	0	1.1592	0	0	0
AAGCGA	1.1659	1.1531	1.1571	0	0	0	1.1571	0	0	0
CCACGG	1.1475	1.1604	1.1669	0	0	0	1.1669	0	0	0
UCUUGC	1.1236	1.1699	1.1805	0	0	0	1.1805	0	0	0
UUUGCA	1.1517	1.155	1.1661	0	0	0	1.1661	0	0	0
ACACGA	1.1555	1.1386	1.1783	0	0	0	1.1783	0	0	0
CUUGUG	1.15	1.1689	1.1534	0	0	0	1.1534	0	0	0
CUGCGC	1.1361	1.1502	1.1844	0	0	0	1.1844	0	0	0
AUUCCC	1.1433	1.1576	1.169	0	0	0	1.169	0	0	0
UGCCAC	1.1488	1.132	1.189	0	0	0	1.189	0	0	0
UCCACC	1.1478	1.1454	1.176	0	0	0	1.176	0	0	0
GGCAGA	1.1579	1.177	1.1334	0	0	0	1.1334	0	0	0
UGGAAC	1.1658	1.1653	1.1369	0	0	0	1.1369	0	0	0
UUUUCG	1.1366	1.1479	1.1826	0	0	0	1.1826	0	0	0
GGGAAA	1.1856	1.1679	1.1136	0	0	0	1.1136	0	0	0
CAAUGG	1.1775	1.1329	1.155	0	0	0	1.155	0	0	0
GCCGAG	1.1762	1.1502	1.1383	0	0	0	1.1383	0	0	0
UGUGGC	1.1575	1.1629	1.143	0	0	0	1.143	0	0	0
AUGUUC	1.1505	1.1642	1.1486	0	0	0	1.1486	0	0	0
UGCCCU	1.1256	1.1506	1.1866	0	0	0	1.1866	0	0	0
GGCGUG	1.1641	1.159	1.1389	0	0	0	1.1389	0	0	0
GAAGCC	1.1527	1.1586	1.1498	0	0	0	1.1498	0	0	0
UACCUG	1.1291	1.1634	1.1682	0	0	0	1.1682	0	0	0
UUCGAC	1.1543	1.1473	1.1589	0	0	0	1.1589	0	0	0
AUAGAU	1.1127	1.1432	1.2041	0	0	0	1.2041	0	0	0
GCCCAA	1.1493	1.1328	1.1776	0	0	0	1.1776	0	0	0
CUGAAA	1.1838	1.1527	1.1228	0	0	0	1.1228	0	0	0
GCCUGG	1.1283	1.1545	1.1765	0	0	0	1.1765	0	0	0
CCAGUG	1.1407	1.1561	1.162	0	0	0	1.162	0	0	0
CCGGCC	1.1375	1.1412	1.179	0	0	0	1.179	0	0	0
GCUUGC	1.142	1.1664	1.1492	0	0	0	1.1492	0	0	0
GCCCCA	1.135	1.1474	1.1748	0	0	0	1.1748	0	0	0
GCCUCC	1.1375	1.1369	1.1827	0	0	0	1.1827	0	0	0
CUGGGG	1.1459	1.1759	1.1348	0	0	0	1.1348	0	0	0
GCUGCG	1.1373	1.1651	1.1528	0	0	0	1.1528	0	0	0
CUGAGC	1.1455	1.1574	1.152	0	0	0	1.152	0	0	0
GAAGAC	1.1803	1.1735	1.1007	0	0	0	1.1007	0	0	0
UGCGAA	1.1718	1.1544	1.1282	0	0	0	1.1282	0	0	0
CCCCAA	1.1539	1.1306	1.1656	0	0	0	1.1656	0	0	0
ACCCAC	1.1431	1.1259	1.1807	0	0	0	1.1807	0	0	0
ACUGGC	1.1469	1.151	1.1512	0	0	0	1.1512	0	0	0
GUAGAU	1.1228	1.1648	1.1605	0	0	0	1.1605	0	0	0
CCGGGC	1.1479	1.1543	1.1447	0	0	0	1.1447	0	0	0
UCCGCG	1.1455	1.1331	1.1683	0	0	0	1.1683	0	0	0
GCACUC	1.1636	1.1348	1.1482	0	0	0	1.1482	0	0	0
UUCGCC	1.1292	1.1462	1.1698	0	0	0	1.1698	0	0	0
UGCCGC	1.1262	1.148	1.1698	0	0	0	1.1698	0	0	0
CCCUCC	1.1458	1.1284	1.1691	0	0	0	1.1691	0	0	0
CCGGAG	1.1559	1.1521	1.1349	0	0	0	1.1349	0	0	0
GGCUGG	1.1258	1.1874	1.129	0	0	0	1.129	0	0	0
CCCCCA	1.1542	1.1274	1.1601	0	0	0	1.1601	0	0	0
CUGAAG	1.1596	1.1654	1.1139	0	0	0	1.1139	0	0	0
CGCCGA	1.1606	1.1179	1.1597	0	0	0	1.1597	0	0	0
CCGACC	1.1407	1.1359	1.1616	0	0	0	1.1616	0	0	0
CGGUUG	1.1343	1.1641	1.1392	0	0	0	1.1392	0	0	0
AUGUUU	1.1489	1.1335	1.1543	0	0	0	1.1543	0	0	0
GAACAC	1.1727	1.1312	1.1327	0	0	0	1.1327	0	0	0
GAAGAG	1.1831	1.1621	1.0907	0	0	0	1.0907	0	0	0
UGCUUU	1.1038	1.1536	1.1772	0	0	0	1.1772	0	0	0
UGCGCA	1.1364	1.1383	1.1596	0	0	0	1.1596	0	0	0
UGCCUC	1.1092	1.1346	1.1897	0	0	0	1.1897	0	0	0
UGGGAC	1.146	1.1492	1.1379	0	0	0	1.1379	0	0	0
UGACUA	1.1344	1.1493	1.148	0	0	0	1.148	0	0	0
CCUGCU	1.1203	1.1328	1.1786	0	0	0	1.1786	0	0	0
GGUCUG	1.1565	1.1597	1.1152	0	0	0	1.1152	0	0	0
UUGCUA	1.1622	1.1324	1.1348	0	0	0	1.1348	0	0	0
AGUUUG	1.1658	1.1377	1.1259	0	0	0	1.1259	0	0	0
GACACA	1.1506	1.1273	1.1508	0	0	0	1.1508	0	0	0
UCCGUG	1.1207	1.1497	1.1583	0	0	0	1.1583	0	0	0
CUCCCG	1.1365	1.1369	1.1546	0	0	0	1.1546	0	0	0
AUGCAA	1.1473	1.1135	1.167	0	0	0	1.167	0	0	0
UUUGAA	1.148	1.151	1.1274	0	0	0	1.1274	0	0	0
ACCCCA	1.1394	1.1153	1.1689	0	0	0	1.1689	0	0	0
UUAGAU	1.1053	1.1412	1.1763	0	0	0	1.1763	0	0	0
GGAAGA	1.1664	1.1661	1.0883	0	0	0	1.0883	0	0	0
ACACCG	1.137	1.1271	1.155	0	0	0	1.155	0	0	0
CUGGAG	1.129	1.1671	1.1219	0	0	0	1.1219	0	0	0
UUUGGG	1.1301	1.1551	1.1289	0	0	0	1.1289	0	0	0
CUGUGG	1.1424	1.1547	1.1159	0	0	0	1.1159	0	0	0
UGAACU	1.1433	1.1511	1.1183	0	0	0	1.1183	0	0	0
CUGAGG	1.1772	1.141	1.0944	0	0	0	1.0944	0	0	0
CCUCCC	1.1391	1.1242	1.1471	0	0	0	1.1471	0	0	0
CGGGCU	1.134	1.1508	1.1251	0	0	0	1.1251	0	0	0
CCCUCG	1.1357	1.1325	1.1416	0	0	0	1.1416	0	0	0
CCAGGA	1.1519	1.1327	1.1246	0	0	0	1.1246	0	0	0
UUGCGU	1.1344	1.1491	1.1249	0	0	0	1.1249	0	0	0
UGGGGA	1.1603	1.1436	1.1043	0	0	0	1.1043	0	0	0
CGGCCC	1.1133	1.1379	1.1552	0	0	0	1.1552	0	0	0
GUUAUG	1.1345	1.1328	1.1384	0	0	0	1.1384	0	0	0
GGAAAA	1.1839	1.1304	1.0907	0	0	0	1.0907	0	0	0
UCGCGA	1.1502	1.138	1.1166	0	0	0	1.1166	0	0	0
GAACCG	1.1629	1.1392	1.1024	0	0	0	1.1024	0	0	0
UGCACU	1.1437	1.1311	1.1297	0	0	0	1.1297	0	0	0
UGAGGG	1.1397	1.1554	1.1081	0	0	0	1.1081	0	0	0
GCGCCU	1.1339	1.1278	1.14	0	0	0	1.14	0	0	0
GCUGCC	1.1144	1.1206	1.1642	0	0	0	1.1642	0	0	0
ACUGUA	1.1548	1.1393	1.1049	0	0	0	1.1049	0	0	0
ACGCUG	1.1383	1.1275	1.1331	0	0	0	1.1331	0	0	0
UCAAUG	1.1136	1.1143	1.1706	0	0	0	1.1706	0	0	0
UGACGU	1.1508	1.1292	1.1181	0	0	0	1.1181	0	0	0
GGGAAC	1.1541	1.1355	1.1069	0	0	0	1.1069	0	0	0
GGACCC	1.1331	1.1182	1.1446	0	0	0	1.1446	0	0	0
AGCCCC	1.1241	1.1216	1.1492	0	0	0	1.1492	0	0	0
UUUCGC	1.1124	1.1306	1.1517	0	0	0	1.1517	0	0	0
UGCGGU	1.1149	1.1569	1.1228	0	0	0	1.1228	0	0	0
CCGUUG	1.1331	1.1275	1.1338	0	0	0	1.1338	0	0	0
CCCGCA	1.109	1.1107	1.1746	0	0	0	1.1746	0	0	0
AAUGUG	1.1186	1.139	1.1348	0	0	0	1.1348	0	0	0
UGCCAG	1.1146	1.13	1.1478	0	0	0	1.1478	0	0	0
GUACUG	1.1382	1.1493	1.1048	0	0	0	1.1048	0	0	0
UCGCUG	1.1213	1.1373	1.1336	0	0	0	1.1336	0	0	0
UUGAAC	1.1338	1.1425	1.1155	0	0	0	1.1155	0	0	0
GCCCAC	1.1192	1.1043	1.1679	0	0	0	1.1679	0	0	0
AGACGA	1.1454	1.1398	1.1057	0	0	0	1.1057	0	0	0
UACACC	1.1301	1.1171	1.1433	0	0	0	1.1433	0	0	0
UCUGAG	1.15	1.1387	1.0994	0	0	0	1.0994	0	0	0
CACCGG	1.1231	1.1238	1.1412	0	0	0	1.1412	0	0	0
GUCCUG	1.1374	1.122	1.1269	0	0	0	1.1269	0	0	0
GAGAGC	1.1476	1.1324	1.1054	0	0	0	1.1054	0	0	0
GGGGUG	1.1262	1.1587	1.1002	0	0	0	1.1002	0	0	0
UAGCUG	1.1254	1.1503	1.1093	0	0	0	1.1093	0	0	0
GGGAAG	1.1577	1.1413	1.0845	0	0	0	1.0845	0	0	0
UCUGAC	1.1317	1.1209	1.1304	0	0	0	1.1304	0	0	0
UGGGGG	1.1478	1.1198	1.1148	0	0	0	1.1148	0	0	0
UCCGCC	1.1005	1.1148	1.165	0	0	0	1.165	0	0	0
GCUGAA	1.131	1.1458	1.1017	0	0	0	1.1017	0	0	0
ACUGCG	1.1179	1.1323	1.1282	0	0	0	1.1282	0	0	0
UGAACG	1.147	1.1306	1.0992	0	0	0	1.0992	0	0	0
UGGUGC	1.132	1.1315	1.112	0	0	0	1.112	0	0	0
GCGGUG	1.1167	1.1423	1.1154	0	0	0	1.1154	0	0	0
UGCCUU	1.0746	1.1336	1.1648	0	0	0	1.1648	0	0	0
CUACUG	1.1261	1.1317	1.1151	0	0	0	1.1151	0	0	0
AGGACU	1.1492	1.1183	1.1053	0	0	0	1.1053	0	0	0
UGAACA	1.1391	1.1208	1.1129	0	0	0	1.1129	0	0	0
AUUGAA	1.1294	1.1304	1.1126	0	0	0	1.1126	0	0	0
UGGCGU	1.1391	1.1264	1.1066	0	0	0	1.1066	0	0	0
GCAGUG	1.1144	1.1397	1.1175	0	0	0	1.1175	0	0	0
UGCAGC	1.1141	1.1153	1.1393	0	0	0	1.1393	0	0	0
CGCAGA	1.1155	1.126	1.1268	0	0	0	1.1268	0	0	0
UAGAAC	1.1387	1.1302	1.0993	0	0	0	1.0993	0	0	0
GUCUUG	1.1237	1.1328	1.1103	0	0	0	1.1103	0	0	0
CGAGCC	1.1226	1.1205	1.1232	0	0	0	1.1232	0	0	0
CAAAGA	1.131	1.1188	1.116	0	0	0	1.116	0	0	0
GGUAGA	1.1208	1.1448	1.0986	0	0	0	1.0986	0	0	0
GACAGC	1.1048	1.1169	1.1425	0	0	0	1.1425	0	0	0
UCAGAU	1.0782	1.1093	1.1766	0	0	0	1.1766	0	0	0
GCUGUA	1.1379	1.1363	1.0895	0	0	0	1.0895	0	0	0
CGCGAG	1.1382	1.1231	1.1023	0	0	0	1.1023	0	0	0
GCGGAC	1.156	1.0921	1.1153	0	0	0	1.1153	0	0	0
AAUUUC	1.1005	1.113	1.1495	0	0	0	1.1495	0	0	0
AUCCGC	1.111	1.1044	1.1475	0	0	0	1.1475	0	0	0
CCGGUG	1.1069	1.1385	1.1173	0	0	0	1.1173	0	0	0
CUUGCU	1.097	1.1337	1.1316	0	0	0	1.1316	0	0	0
UUUCCU	1.0766	1.1261	1.1594	0	0	0	1.1594	0	0	0
CGCGCC	1.1022	1.1124	1.1467	0	0	0	1.1467	0	0	0
ACCAGA	1.1247	1.1068	1.1289	0	0	0	1.1289	0	0	0
GGCUCC	1.1137	1.1191	1.1264	0	0	0	1.1264	0	0	0
UGUGGA	1.1281	1.1293	1.1016	0	0	0	1.1016	0	0	0
UGCAGG	1.1159	1.1325	1.1097	0	0	0	1.1097	0	0	0
CCCCAC	1.1152	1.0998	1.1431	0	0	0	1.1431	0	0	0
UUGAAA	1.1409	1.1224	1.0939	0	0	0	1.0939	0	0	0
GAAAAU	1.1475	1.124	1.0853	0	0	0	1.0853	0	0	0
UUAUUG	1.1093	1.1169	1.1304	0	0	0	1.1304	0	0	0
CUGGAA	1.1349	1.1315	1.0898	0	0	0	1.0898	0	0	0
GAUCAU	1.0832	1.1036	1.1691	0	0	0	1.1691	0	0	0
UGUAGC	1.1185	1.1416	1.0957	0	0	0	1.0957	0	0	0
UCCAGA	1.1255	1.1045	1.1251	0	0	0	1.1251	0	0	0
GACCCU	1.1114	1.1175	1.126	0	0	0	1.126	0	0	0
GGGACU	1.1469	1.1145	1.0932	0	0	0	1.0932	0	0	0
AUUGGA	1.1228	1.1263	1.1049	0	0	0	1.1049	0	0	0
AUGCUU	1.1054	1.099	1.1494	0	0	0	1.1494	0	0	0
ACCACC	1.1099	1.0925	1.1511	0	0	0	1.1511	0	0	0
UGGAAG	1.1285	1.1384	1.0861	0	0	0	1.0861	0	0	0
UCGCCC	1.1165	1.1055	1.1309	0	0	0	1.1309	0	0	0
UGGAAA	1.1492	1.1198	1.0837	0	0	0	1.0837	0	0	0
CUGCGG	1.1212	1.1224	1.1082	0	0	0	1.1082	0	0	0
GACGAC	1.1184	1.1276	1.1058	0	0	0	1.1058	0	0	0
CUUGCA	1.1107	1.1218	1.1191	0	0	0	1.1191	0	0	0
GAGGAA	1.1598	1.1277	1.0628	0	0	0	1.0628	0	0	0
UCCUCC	1.1012	1.1014	1.1474	0	0	0	1.1474	0	0	0
GGUGUG	1.0831	1.1556	1.1113	0	0	0	1.1113	0	0	0
CAGUUG	1.123	1.107	1.1199	0	0	0	1.1199	0	0	0
ACGGAC	1.1264	1.1023	1.1206	0	0	0	1.1206	0	0	0
CUGCCG	1.1088	1.111	1.1284	0	0	0	1.1284	0	0	0
UUCUCG	1.11	1.1066	1.1313	0	0	0	1.1313	0	0	0
CCAAAA	1.1409	1.0953	1.1115	0	0	0	1.1115	0	0	0
UGAAGG	1.1468	1.1253	1.0756	0	0	0	1.0756	0	0	0
UGGAGC	1.1212	1.1215	1.1047	0	0	0	1.1047	0	0	0
CGAGGA	1.1373	1.1312	1.0782	0	0	0	1.0782	0	0	0
GGGAGA	1.1384	1.1341	1.0733	0	0	0	1.0733	0	0	0
GCAGAA	1.1422	1.1397	1.0638	0	0	0	1.0638	0	0	0
GGCUAU	1.1308	1.1261	1.0886	0	0	0	1.0886	0	0	0
CCCCUC	1.1169	1.0975	1.1305	0	0	0	1.1305	0	0	0
UUCCAG	1.1157	1.1052	1.1229	0	0	0	1.1229	0	0	0
GAGGUG	1.1342	1.1312	1.0773	0	0	0	1.0773	0	0	0
UGGGCC	1.1021	1.1205	1.1185	0	0	0	1.1185	0	0	0
UUUGGA	1.1058	1.1208	1.1144	0	0	0	1.1144	0	0	0
CCAAAG	1.1234	1.1024	1.1148	0	0	0	1.1148	0	0	0
UGCUAG	1.1101	1.1266	1.1034	0	0	0	1.1034	0	0	0
AGAAAA	1.1623	1.107	1.0707	0	0	0	1.0707	0	0	0
GCGAUC	1.0907	1.12	1.1293	0	0	0	1.1293	0	0	0
GGGCCC	1.105	1.1141	1.1204	0	0	0	1.1204	0	0	0
CUGGCU	1.1038	1.1294	1.1059	0	0	0	1.1059	0	0	0
GGGUUG	1.1184	1.1252	1.0951	0	0	0	1.0951	0	0	0
GAGCCU	1.1068	1.1178	1.1127	0	0	0	1.1127	0	0	0
UCCGGA	1.1156	1.1125	1.1089	0	0	0	1.1089	0	0	0
AAUUCC	1.118	1.0935	1.1245	0	0	0	1.1245	0	0	0
ACCCGU	1.1318	1.0948	1.1087	0	0	0	1.1087	0	0	0
UGGGCU	1.1168	1.1131	1.1054	0	0	0	1.1054	0	0	0
AAGCCC	1.1083	1.103	1.1231	0	0	0	1.1231	0	0	0
GAGCUC	1.1168	1.118	1.0984	0	0	0	1.0984	0	0	0
AACCCC	1.1097	1.0971	1.1259	0	0	0	1.1259	0	0	0
GACGAA	1.1366	1.112	1.0836	0	0	0	1.0836	0	0	0
GAAACG	1.1345	1.1227	1.0746	0	0	0	1.0746	0	0	0
UUGCAA	1.1237	1.1033	1.1041	0	0	0	1.1041	0	0	0
GCUGCU	1.109	1.1196	1.1024	0	0	0	1.1024	0	0	0
AUCCCG	1.1066	1.1052	1.1189	0	0	0	1.1189	0	0	0
AGAGAC	1.1237	1.1204	1.084	0	0	0	1.084	0	0	0
UACUUG	1.0992	1.1156	1.1129	0	0	0	1.1129	0	0	0
AGGCCC	1.1067	1.1086	1.1115	0	0	0	1.1115	0	0	0
AGGCAC	1.1356	1.0807	1.1103	0	0	0	1.1103	0	0	0
UGUGCG	1.0921	1.1387	1.0955	0	0	0	1.0955	0	0	0
CCCGCU	1.0885	1.1084	1.1285	0	0	0	1.1285	0	0	0
CGCCCU	1.1018	1.1029	1.1204	0	0	0	1.1204	0	0	0
UCCGGC	1.0835	1.114	1.1273	0	0	0	1.1273	0	0	0
GGGGAA	1.1354	1.1221	1.0669	0	0	0	1.0669	0	0	0
CUCUGG	1.1019	1.1211	1.1014	0	0	0	1.1014	0	0	0
UUCCAC	1.106	1.0852	1.1312	0	0	0	1.1312	0	0	0
UCUGCC	1.081	1.105	1.1358	0	0	0	1.1358	0	0	0
CAUUGC	1.1002	1.1066	1.1135	0	0	0	1.1135	0	0	0
UGGGCA	1.0974	1.1167	1.106	0	0	0	1.106	0	0	0
UGGACU	1.112	1.1185	1.0884	0	0	0	1.0884	0	0	0
CCGACG	1.1281	1.0937	1.0955	0	0	0	1.0955	0	0	0
GCUCCG	1.0904	1.1004	1.1264	0	0	0	1.1264	0	0	0
UGCAAU	1.1101	1.0843	1.1216	0	0	0	1.1216	0	0	0
GUGCCC	1.0815	1.116	1.118	0	0	0	1.118	0	0	0
UGGGAU	1.1184	1.1265	1.0704	0	0	0	1.0704	0	0	0
CCGACA	1.1058	1.0876	1.1217	0	0	0	1.1217	0	0	0
UUCAGA	1.0913	1.0957	1.128	0	0	0	1.128	0	0	0
AUGUCU	1.0917	1.1108	1.1124	0	0	0	1.1124	0	0	0
UCACGA	1.1015	1.0857	1.1268	0	0	0	1.1268	0	0	0
GACUCG	1.1124	1.1279	1.0734	0	0	0	1.0734	0	0	0
GAGGCU	1.1193	1.1052	1.0872	0	0	0	1.0872	0	0	0
CGGGUG	1.1051	1.1144	1.0922	0	0	0	1.0922	0	0	0
UUGGGA	1.1079	1.1152	1.0884	0	0	0	1.0884	0	0	0
UUCUCC	1.0737	1.1085	1.1288	0	0	0	1.1288	0	0	0
UCUGCG	1.101	1.1074	1.1016	0	0	0	1.1016	0	0	0
CUCAGA	1.0934	1.1073	1.109	0	0	0	1.109	0	0	0
CCAUGG	1.0774	1.1128	1.119	0	0	0	1.119	0	0	0
CGAAAA	1.1404	1.1048	1.0634	0	0	0	1.0634	0	0	0
CCUUCC	1.0767	1.1091	1.1227	0	0	0	1.1227	0	0	0
AAAGUG	1.1215	1.0949	1.0918	0	0	0	1.0918	0	0	0
GCACCA	1.1051	1.0813	1.1211	0	0	0	1.1211	0	0	0
UCCUGG	1.0893	1.1148	1.1031	0	0	0	1.1031	0	0	0
GGGGCU	1.1075	1.1099	1.0894	0	0	0	1.0894	0	0	0
UUUUCU	1.0839	1.0871	1.1339	0	0	0	1.1339	0	0	0
CACGAG	1.1238	1.0926	1.0883	0	0	0	1.0883	0	0	0
GACCAG	1.1008	1.1104	1.0934	0	0	0	1.0934	0	0	0
UUUUUC	1.0514	1.0858	1.1674	0	0	0	1.1674	0	0	0
AAAACC	1.1255	1.0868	1.092	0	0	0	1.092	0	0	0
UAGCGA	1.0816	1.1176	1.1038	0	0	0	1.1038	0	0	0
CCAGCG	1.0912	1.0888	1.1203	0	0	0	1.1203	0	0	0
CGGACC	1.119	1.0769	1.1041	0	0	0	1.1041	0	0	0
GGGGGG	1.081	1.1313	1.087	0	0	0	1.087	0	0	0
UUGAAU	1.1105	1.0975	1.0905	0	0	0	1.0905	0	0	0
ACUUGC	1.0877	1.1005	1.1095	0	0	0	1.1095	0	0	0
GCCCGU	1.0932	1.0942	1.1081	0	0	0	1.1081	0	0	0
GGACUC	1.1187	1.0825	1.0935	0	0	0	1.0935	0	0	0
CUCACC	1.081	1.0788	1.1346	0	0	0	1.1346	0	0	0
UCCGAA	1.0979	1.1049	1.0909	0	0	0	1.0909	0	0	0
UUUCUC	1.0669	1.0843	1.1424	0	0	0	1.1424	0	0	0
GCAUCC	1.0904	1.0958	1.1071	0	0	0	1.1071	0	0	0
AGAACA	1.1233	1.0981	1.0716	0	0	0	1.0716	0	0	0
GGAACU	1.1013	1.1098	1.0819	0	0	0	1.0819	0	0	0
CCGACU	1.1042	1.0986	1.0898	0	0	0	1.0898	0	0	0
GCAAGA	1.0957	1.1015	1.0951	0	0	0	1.0951	0	0	0
GACUUC	1.0855	1.101	1.1049	0	0	0	1.1049	0	0	0
UCUCCG	1.072	1.1059	1.1121	0	0	0	1.1121	0	0	0
CCAGCC	1.0665	1.0852	1.1377	0	0	0	1.1377	0	0	0
GCGGCU	1.1104	1.1059	1.0718	0	0	0	1.0718	0	0	0
CUGGGC	1.0732	1.1089	1.1046	0	0	0	1.1046	0	0	0
AUUACC	1.0787	1.0903	1.1177	0	0	0	1.1177	0	0	0
CUCGAC	1.0995	1.0998	1.0867	0	0	0	1.0867	0	0	0
CGGCAC	1.093	1.0826	1.1091	0	0	0	1.1091	0	0	0
GACCUC	1.0782	1.0962	1.11	0	0	0	1.11	0	0	0
GAAAGC	1.1293	1.1013	1.0532	0	0	0	1.0532	0	0	0
CGGAGA	1.1167	1.106	1.0611	0	0	0	1.0611	0	0	0
GACGCG	1.0898	1.1004	1.093	0	0	0	1.093	0	0	0
AUAGCC	1.0763	1.0894	1.1174	0	0	0	1.1174	0	0	0
UUCGGC	1.081	1.1143	1.0877	0	0	0	1.0877	0	0	0
GAACCU	1.112	1.0961	1.0739	0	0	0	1.0739	0	0	0
CCGGGU	1.0957	1.1003	1.0853	0	0	0	1.0853	0	0	0
GGAACC	1.1076	1.0913	1.0823	0	0	0	1.0823	0	0	0
AGAUAG	1.077	1.0967	1.1075	0	0	0	1.1075	0	0	0
UUUGGU	1.0788	1.1227	1.0761	0	0	0	1.0761	0	0	0
CCGAAU	1.1049	1.1001	1.0718	0	0	0	1.0718	0	0	0
CUGAAU	1.0896	1.1129	1.0727	0	0	0	1.0727	0	0	0
GGAAAG	1.1168	1.1139	1.0435	0	0	0	1.0435	0	0	0
UUUCGG	1.0751	1.0876	1.1109	0	0	0	1.1109	0	0	0
UUGAAG	1.0842	1.1091	1.0802	0	0	0	1.0802	0	0	0
GCCUGU	1.0684	1.1102	1.0942	0	0	0	1.0942	0	0	0
GGCACG	1.0941	1.0881	1.0901	0	0	0	1.0901	0	0	0
UGGACC	1.0928	1.0858	1.0928	0	0	0	1.0928	0	0	0
GGCCAG	1.0909	1.091	1.0892	0	0	0	1.0892	0	0	0
CGUUUG	1.0998	1.0947	1.076	0	0	0	1.076	0	0	0
CCGCGG	1.1158	1.0706	1.0838	0	0	0	1.0838	0	0	0
UUGGGG	1.075	1.1224	1.0724	0	0	0	1.0724	0	0	0
CCACCU	1.0755	1.0851	1.1086	0	0	0	1.1086	0	0	0
UGGAAU	1.1057	1.0971	1.0663	0	0	0	1.0663	0	0	0
GGAGAG	1.1175	1.1114	1.0382	0	0	0	1.0382	0	0	0
GCUGGG	1.0743	1.1122	1.0782	0	0	0	1.0782	0	0	0
UGUGAG	1.1094	1.1023	1.0527	0	0	0	1.0527	0	0	0
GACAUU	1.0745	1.0908	1.099	0	0	0	1.099	0	0	0
UGGGCG	1.0765	1.1102	1.0774	0	0	0	1.0774	0	0	0
UUGGAG	1.0919	1.1127	1.0594	0	0	0	1.0594	0	0	0
AUGUGU	1.078	1.1092	1.0767	0	0	0	1.0767	0	0	0
CCGGCU	1.0834	1.1022	1.078	0	0	0	1.078	0	0	0
ACUGGG	1.1065	1.0913	1.0656	0	0	0	1.0656	0	0	0
AUCUGC	1.0637	1.0959	1.1036	0	0	0	1.1036	0	0	0
AGAGUG	1.0929	1.1061	1.0636	0	0	0	1.0636	0	0	0
GGCCCA	1.0776	1.0841	1.1009	0	0	0	1.1009	0	0	0
UUGAGG	1.0736	1.1232	1.0656	0	0	0	1.0656	0	0	0
AAAAAG	1.1339	1.0726	1.0558	0	0	0	1.0558	0	0	0
CACGGA	1.0887	1.0843	1.0891	0	0	0	1.0891	0	0	0
CUUCCG	1.0686	1.0806	1.1125	0	0	0	1.1125	0	0	0
GAGACG	1.1047	1.0935	1.0626	0	0	0	1.0626	0	0	0
UGCACG	1.0827	1.0884	1.0893	0	0	0	1.0893	0	0	0
CUGCCU	1.0608	1.0841	1.115	0	0	0	1.115	0	0	0
CGCGUG	1.0993	1.0917	1.0688	0	0	0	1.0688	0	0	0
UGCUCC	1.0725	1.0795	1.1075	0	0	0	1.1075	0	0	0
CCUUCG	1.063	1.0851	1.1114	0	0	0	1.1114	0	0	0
GACGCU	1.0871	1.0897	1.0826	0	0	0	1.0826	0	0	0
UUUCCA	1.0726	1.0717	1.1147	0	0	0	1.1147	0	0	0
UGGAGG	1.0882	1.1146	1.0557	0	0	0	1.0557	0	0	0
GAGUUC	1.0969	1.0903	1.0704	0	0	0	1.0704	0	0	0
AUUAGC	1.0725	1.0811	1.1032	0	0	0	1.1032	0	0	0
GCCAUU	1.065	1.074	1.1178	0	0	0	1.1178	0	0	0
GACUAG	1.0842	1.11	1.0623	0	0	0	1.0623	0	0	0
GCAGAC	1.0869	1.1011	1.0685	0	0	0	1.0685	0	0	0
GCGGGA	1.1	1.0911	1.0649	0	0	0	1.0649	0	0	0
GAGCAC	1.0968	1.0891	1.0699	0	0	0	1.0699	0	0	0
UUGUUG	1.075	1.0954	1.0852	0	0	0	1.0852	0	0	0
CUGAGU	1.1122	1.0898	1.0532	0	0	0	1.0532	0	0	0
UGAGGU	1.1007	1.1036	1.0509	0	0	0	1.0509	0	0	0
CCAGGG	1.0813	1.0813	1.0925	0	0	0	1.0925	0	0	0
GAUCGC	1.0913	1.0745	1.089	0	0	0	1.089	0	0	0
GCGGGC	1.0889	1.0907	1.0736	0	0	0	1.0736	0	0	0
GCGACC	1.0822	1.0831	1.0878	0	0	0	1.0878	0	0	0
UUCGUG	1.0583	1.1057	1.0888	0	0	0	1.0888	0	0	0
UGCUCG	1.0953	1.0823	1.075	0	0	0	1.075	0	0	0
UAGAGA	1.0905	1.0983	1.0634	0	0	0	1.0634	0	0	0
GGACUU	1.1086	1.0699	1.0734	0	0	0	1.0734	0	0	0
CCGCGC	1.0628	1.073	1.1156	0	0	0	1.1156	0	0	0
CCGCCU	1.0697	1.0708	1.1108	0	0	0	1.1108	0	0	0
CUGCUU	1.0606	1.0923	1.0981	0	0	0	1.0981	0	0	0
CCAGAC	1.088	1.0753	1.0875	0	0	0	1.0875	0	0	0
AUACUG	1.0664	1.0947	1.0885	0	0	0	1.0885	0	0	0
GAGGCC	1.0828	1.0991	1.0676	0	0	0	1.0676	0	0	0
CCGAAC	1.0938	1.0784	1.0763	0	0	0	1.0763	0	0	0
GGAUUC	1.0877	1.0927	1.0671	0	0	0	1.0671	0	0	0
CACCUU	1.0578	1.0764	1.1118	0	0	0	1.1118	0	0	0
GAACUU	1.0897	1.0895	1.0666	0	0	0	1.0666	0	0	0
CACCUC	1.07	1.0647	1.1108	0	0	0	1.1108	0	0	0
UCCUGC	1.0575	1.0771	1.1104	0	0	0	1.1104	0	0	0
UGUAGG	1.0723	1.11	1.0626	0	0	0	1.0626	0	0	0
CUGUGC	1.0567	1.1048	1.0827	0	0	0	1.0827	0	0	0
GCGGCC	1.0778	1.0808	1.0856	0	0	0	1.0856	0	0	0
GCGAAA	1.1141	1.0788	1.0511	0	0	0	1.0511	0	0	0
GCCUCG	1.0548	1.0908	1.0978	0	0	0	1.0978	0	0	0
CCUCCU	1.0743	1.0764	1.0926	0	0	0	1.0926	0	0	0
UGGGGU	1.0704	1.1298	1.0429	0	0	0	1.0429	0	0	0
AUGCUC	1.0503	1.0849	1.1072	0	0	0	1.1072	0	0	0
CAUGGC	1.0613	1.0847	1.0962	0	0	0	1.0962	0	0	0
GAGGAU	1.0995	1.0947	1.0463	0	0	0	1.0463	0	0	0
GCCGCC	1.0698	1.0606	1.1097	0	0	0	1.1097	0	0	0
UUACUG	1.0662	1.0915	1.0824	0	0	0	1.0824	0	0	0
GCGGGG	1.0895	1.082	1.0678	0	0	0	1.0678	0	0	0
CACCAG	1.0715	1.0598	1.108	0	0	0	1.108	0	0	0
AAUUCG	1.0796	1.0759	1.0835	0	0	0	1.0835	0	0	0
UGUCCC	1.0722	1.0823	1.0845	0	0	0	1.0845	0	0	0
ACAUCC	1.0657	1.0886	1.0847	0	0	0	1.0847	0	0	0
CUGCAC	1.0736	1.0759	1.0889	0	0	0	1.0889	0	0	0
CUGGAC	1.0819	1.0878	1.0686	0	0	0	1.0686	0	0	0
CGAGCU	1.0939	1.0768	1.0674	0	0	0	1.0674	0	0	0
CCGGCG	1.0641	1.0894	1.0845	0	0	0	1.0845	0	0	0
GCGACU	1.0927	1.087	1.0572	0	0	0	1.0572	0	0	0
GGAUUU	1.0818	1.0995	1.0551	0	0	0	1.0551	0	0	0
GUCCGA	1.0894	1.0806	1.0662	0	0	0	1.0662	0	0	0
GCCCCU	1.0714	1.0693	1.0946	0	0	0	1.0946	0	0	0
AAAGAC	1.1023	1.0863	1.0458	0	0	0	1.0458	0	0	0
CGGCGA	1.0694	1.0926	1.0724	0	0	0	1.0724	0	0	0
ACCGGG	1.0851	1.0826	1.0663	0	0	0	1.0663	0	0	0
CUCCGC	1.0575	1.0621	1.1138	0	0	0	1.1138	0	0	0
CGGGAG	1.1029	1.0855	1.0449	0	0	0	1.0449	0	0	0
ACUGCC	1.0676	1.0739	1.0913	0	0	0	1.0913	0	0	0
GACAAC	1.0873	1.0696	1.075	0	0	0	1.075	0	0	0
GCGCUC	1.0799	1.0574	1.0946	0	0	0	1.0946	0	0	0
GGGGGC	1.092	1.0793	1.0597	0	0	0	1.0597	0	0	0
GCGGAA	1.113	1.0836	1.0343	0	0	0	1.0343	0	0	0
GACCAC	1.0844	1.0582	1.0876	0	0	0	1.0876	0	0	0
GGACAC	1.0767	1.0719	1.0816	0	0	0	1.0816	0	0	0
UUUCAC	1.0493	1.0556	1.1252	0	0	0	1.1252	0	0	0
CGUAGA	1.0876	1.0873	1.0541	0	0	0	1.0541	0	0	0
CCGGCA	1.0656	1.0756	1.0869	0	0	0	1.0869	0	0	0
CGGCCU	1.0566	1.0812	1.0901	0	0	0	1.0901	0	0	0
AGGAGA	1.123	1.0823	1.0224	0	0	0	1.0224	0	0	0
CAGCCC	1.0605	1.0518	1.1146	0	0	0	1.1146	0	0	0
AGAACG	1.1025	1.0936	1.03	0	0	0	1.03	0	0	0
ACCUCC	1.0534	1.0719	1.1005	0	0	0	1.1005	0	0	0
AGAAAU	1.1122	1.0696	1.0437	0	0	0	1.0437	0	0	0
CCAGGC	1.0745	1.0666	1.0833	0	0	0	1.0833	0	0	0
GAGGAG	1.1157	1.0879	1.0204	0	0	0	1.0204	0	0	0
GUGACA	1.0778	1.0756	1.0706	0	0	0	1.0706	0	0	0
CAUGAC	1.0541	1.0697	1.0999	0	0	0	1.0999	0	0	0
CGAAUU	1.0746	1.0858	1.0632	0	0	0	1.0632	0	0	0
UCGAUC	1.0457	1.0704	1.1072	0	0	0	1.1072	0	0	0
AUGGAU	1.0715	1.0705	1.0802	0	0	0	1.0802	0	0	0
GAAGCG	1.1043	1.0705	1.0473	0	0	0	1.0473	0	0	0
UUGCAU	1.071	1.0825	1.0674	0	0	0	1.0674	0	0	0
GCCACG	1.0661	1.0622	1.0921	0	0	0	1.0921	0	0	0
UUCCAA	1.0765	1.0604	1.0822	0	0	0	1.0822	0	0	0
GGACAG	1.0867	1.0719	1.06	0	0	0	1.06	0	0	0
GCCGUG	1.0732	1.0709	1.0743	0	0	0	1.0743	0	0	0
CGAGGC	1.0952	1.0661	1.057	0	0	0	1.057	0	0	0
CAACCC	1.0614	1.0609	1.095	0	0	0	1.095	0	0	0
GAGAGU	1.1078	1.0858	1.0236	0	0	0	1.0236	0	0	0
AUCCGG	1.0475	1.0985	1.0712	0	0	0	1.0712	0	0	0
CAGAAC	1.0856	1.0658	1.0657	0	0	0	1.0657	0	0	0
ACCGUG	1.0977	1.0674	1.0519	0	0	0	1.0519	0	0	0
UGCUUC	1.0483	1.0777	1.0903	0	0	0	1.0903	0	0	0
GGCGAG	1.0744	1.0916	1.0499	0	0	0	1.0499	0	0	0
CUCGGG	1.0839	1.0769	1.0546	0	0	0	1.0546	0	0	0
UGCCAA	1.057	1.0621	1.0957	0	0	0	1.0957	0	0	0
GGCGCU	1.0817	1.0662	1.0668	0	0	0	1.0668	0	0	0
CGAACC	1.0866	1.0635	1.0634	0	0	0	1.0634	0	0	0
UGUUCC	1.0577	1.0826	1.0728	0	0	0	1.0728	0	0	0
GCGCUU	1.061	1.0665	1.0852	0	0	0	1.0852	0	0	0
GCGUUG	1.065	1.0857	1.0596	0	0	0	1.0596	0	0	0
GAGCCA	1.0783	1.0631	1.0688	0	0	0	1.0688	0	0	0
GGAUGC	1.0811	1.0444	1.0845	0	0	0	1.0845	0	0	0
GUGACU	1.0617	1.0908	1.056	0	0	0	1.056	0	0	0
GUGCGA	1.0563	1.0865	1.0652	0	0	0	1.0652	0	0	0
CGGGGG	1.072	1.0839	1.0518	0	0	0	1.0518	0	0	0
AUAGCU	1.0748	1.0778	1.0537	0	0	0	1.0537	0	0	0
AGAGCU	1.0741	1.0743	1.0579	0	0	0	1.0579	0	0	0
GACUUU	1.0514	1.0897	1.065	0	0	0	1.065	0	0	0
UUCGCU	1.0755	1.0614	1.0687	0	0	0	1.0687	0	0	0
UGGUAG	1.0827	1.0814	1.0411	0	0	0	1.0411	0	0	0
GAGAGG	1.0969	1.0807	1.027	0	0	0	1.027	0	0	0
AAAUUU	1.0551	1.0581	1.0913	0	0	0	1.0913	0	0	0
GGCAGG	1.0735	1.0634	1.0674	0	0	0	1.0674	0	0	0
AGAUAC	1.0242	1.0921	1.0863	0	0	0	1.0863	0	0	0
GGACCG	1.082	1.0682	1.0522	0	0	0	1.0522	0	0	0
GGCUCG	1.09	1.0598	1.0516	0	0	0	1.0516	0	0	0
GGGAUU	1.0774	1.0848	1.0388	0	0	0	1.0388	0	0	0
AGAGAG	1.0941	1.075	1.0313	0	0	0	1.0313	0	0	0
CUUUGC	1.0319	1.0696	1.0983	0	0	0	1.0983	0	0	0
AAGAAC	1.0946	1.075	1.0286	0	0	0	1.0286	0	0	0
CCCAAC	1.0606	1.045	1.0923	0	0	0	1.0923	0	0	0
GCCUUC	1.0327	1.0605	1.1047	0	0	0	1.1047	0	0	0
AAAACG	1.0916	1.064	1.0414	0	0	0	1.0414	0	0	0
UCCCGC	1.0402	1.0626	1.094	0	0	0	1.094	0	0	0
UCCCAG	1.0579	1.0665	1.0719	0	0	0	1.0719	0	0	0
UGUGAA	1.1029	1.0696	1.0233	0	0	0	1.0233	0	0	0
ACCCCU	1.0541	1.0643	1.076	0	0	0	1.076	0	0	0
CGGGGA	1.0932	1.0634	1.0377	0	0	0	1.0377	0	0	0
GGACGA	1.0773	1.0599	1.0571	0	0	0	1.0571	0	0	0
ACCUCG	1.077	1.0559	1.0607	0	0	0	1.0607	0	0	0
GAGCAA	1.0631	1.0832	1.0466	0	0	0	1.0466	0	0	0
AGAGCC	1.0603	1.0678	1.0647	0	0	0	1.0647	0	0	0
GGAAAU	1.0698	1.0879	1.0346	0	0	0	1.0346	0	0	0
CGGGGC	1.0717	1.0621	1.0574	0	0	0	1.0574	0	0	0
GCGACA	1.074	1.0545	1.0616	0	0	0	1.0616	0	0	0
UAGAAU	1.0764	1.078	1.0354	0	0	0	1.0354	0	0	0
GAGCUU	1.0659	1.0672	1.0564	0	0	0	1.0564	0	0	0
AUGCUA	1.0529	1.06	1.0765	0	0	0	1.0765	0	0	0
UCUGGG	1.0388	1.0969	1.0535	0	0	0	1.0535	0	0	0
AGAAAG	1.0981	1.077	1.0137	0	0	0	1.0137	0	0	0
CCAAGG	1.082	1.0473	1.0595	0	0	0	1.0595	0	0	0
UGCUCU	1.0465	1.0739	1.0682	0	0	0	1.0682	0	0	0
UAUUUG	1.0316	1.066	1.0908	0	0	0	1.0908	0	0	0
CUUCCC	1.0348	1.073	1.0804	0	0	0	1.0804	0	0	0
CUAAUG	1.0537	1.0634	1.0699	0	0	0	1.0699	0	0	0
GCGAGG	1.0824	1.073	1.031	0	0	0	1.031	0	0	0
CGACGC	1.063	1.0576	1.0658	0	0	0	1.0658	0	0	0
CGGAAU	1.0762	1.073	1.0371	0	0	0	1.0371	0	0	0
UUGGAA	1.0724	1.0705	1.0434	0	0	0	1.0434	0	0	0
ACACUC	1.0658	1.0544	1.0656	0	0	0	1.0656	0	0	0
GCUAGA	1.0556	1.08	1.0501	0	0	0	1.0501	0	0	0
GAAAGG	1.0988	1.0766	1.0103	0	0	0	1.0103	0	0	0
GAAGGC	1.0771	1.0775	1.0311	0	0	0	1.0311	0	0	0
UUCUGU	1.0377	1.089	1.059	0	0	0	1.059	0	0	0
AUAAUG	1.0411	1.0603	1.0841	0	0	0	1.0841	0	0	0
CCUGCA	1.0413	1.0567	1.0872	0	0	0	1.0872	0	0	0
GGCGCG	1.0651	1.0593	1.0607	0	0	0	1.0607	0	0	0
CAGAAU	1.0937	1.0569	1.0343	0	0	0	1.0343	0	0	0
ACACCA	1.0554	1.0459	1.0824	0	0	0	1.0824	0	0	0
CCGCAG	1.029	1.0668	1.0874	0	0	0	1.0874	0	0	0
GAAUGG	1.0738	1.0846	1.0241	0	0	0	1.0241	0	0	0
GACCAA	1.0739	1.0544	1.0536	0	0	0	1.0536	0	0	0
GUCGAU	1.0311	1.0707	1.08	0	0	0	1.08	0	0	0
GACAAG	1.0666	1.0584	1.0565	0	0	0	1.0565	0	0	0
UGGACA	1.0494	1.0618	1.0693	0	0	0	1.0693	0	0	0
CCAACG	1.0552	1.0501	1.0746	0	0	0	1.0746	0	0	0
GGCAGC	1.0673	1.0527	1.0598	0	0	0	1.0598	0	0	0
AAGACU	1.0777	1.0717	1.0294	0	0	0	1.0294	0	0	0
AAGACA	1.075	1.0605	1.0431	0	0	0	1.0431	0	0	0
GUGUUG	1.0732	1.0668	1.0385	0	0	0	1.0385	0	0	0
GCGGCA	1.0776	1.0448	1.0557	0	0	0	1.0557	0	0	0
UGAGUU	1.0506	1.0773	1.0498	0	0	0	1.0498	0	0	0
GCUGUU	1.0524	1.0576	1.0673	0	0	0	1.0673	0	0	0
CAACCG	1.0648	1.0473	1.0652	0	0	0	1.0652	0	0	0
AGAAAC	1.0851	1.067	1.0248	0	0	0	1.0248	0	0	0
AAGACC	1.0737	1.0626	1.0391	0	0	0	1.0391	0	0	0
UUUCAG	1.0324	1.0627	1.0798	0	0	0	1.0798	0	0	0
GUCAUG	1.053	1.0493	1.0719	0	0	0	1.0719	0	0	0
GGGACC	1.0623	1.0607	1.0509	0	0	0	1.0509	0	0	0
CUCCAG	1.0548	1.0487	1.0701	0	0	0	1.0701	0	0	0
AAUUCU	1.0599	1.053	1.0604	0	0	0	1.0604	0	0	0
AUCAUG	1.0579	1.029	1.0856	0	0	0	1.0856	0	0	0
GUAGAC	1.0626	1.0838	1.0251	0	0	0	1.0251	0	0	0
CACUGG	1.0597	1.0548	1.057	0	0	0	1.057	0	0	0
GCCCUC	1.0472	1.0446	1.0797	0	0	0	1.0797	0	0	0
UUCGCA	1.0428	1.0518	1.0765	0	0	0	1.0765	0	0	0
UGCCAU	1.0351	1.0541	1.0818	0	0	0	1.0818	0	0	0
GAGGAC	1.091	1.0581	1.0218	0	0	0	1.0218	0	0	0
GGGGCC	1.0421	1.0624	1.0653	0	0	0	1.0653	0	0	0
UGUUGC	1.0414	1.0728	1.0553	0	0	0	1.0553	0	0	0
GGCCCU	1.0325	1.0707	1.0662	0	0	0	1.0662	0	0	0
GGGCUC	1.064	1.0526	1.0523	0	0	0	1.0523	0	0	0
CCGCCG	1.0593	1.0369	1.0725	0	0	0	1.0725	0	0	0
GGGGCA	1.0624	1.0675	1.0385	0	0	0	1.0385	0	0	0
UGAAUC	1.0567	1.0646	1.0471	0	0	0	1.0471	0	0	0
AUGGUU	1.0477	1.0658	1.0545	0	0	0	1.0545	0	0	0
GAGGCA	1.071	1.058	1.0376	0	0	0	1.0376	0	0	0
GAACAG	1.076	1.0587	1.0313	0	0	0	1.0313	0	0	0
UGUGGU	1.0646	1.0803	1.021	0	0	0	1.021	0	0	0
GGAACA	1.0808	1.054	1.0309	0	0	0	1.0309	0	0	0
CCUCGG	1.0524	1.0661	1.0472	0	0	0	1.0472	0	0	0
ACUUGG	1.0656	1.0672	1.032	0	0	0	1.032	0	0	0
GAGGGA	1.0563	1.0852	1.0217	0	0	0	1.0217	0	0	0
CUCGAA	1.0902	1.0512	1.0217	0	0	0	1.0217	0	0	0
CUUGGG	1.0393	1.0732	1.0506	0	0	0	1.0506	0	0	0
UCCGAC	1.0579	1.0458	1.0579	0	0	0	1.0579	0	0	0
CGGGCC	1.0542	1.0472	1.06	0	0	0	1.06	0	0	0
ACUCCG	1.0512	1.0494	1.0599	0	0	0	1.0599	0	0	0
CGGGAC	1.0701	1.0501	1.0401	0	0	0	1.0401	0	0	0
GCGAGC	1.0542	1.0558	1.0502	0	0	0	1.0502	0	0	0
GGGCAC	1.057	1.0435	1.0596	0	0	0	1.0596	0	0	0
UAAGAU	1.0208	1.0433	1.0948	0	0	0	1.0948	0	0	0
GAACCA	1.0699	1.0414	1.047	0	0	0	1.047	0	0	0
CGGACG	1.0634	1.0408	1.0537	0	0	0	1.0537	0	0	0
CGAGGG	1.0521	1.0758	1.0299	0	0	0	1.0299	0	0	0
UAACUG	1.0705	1.0459	1.0411	0	0	0	1.0411	0	0	0
CGAAAU	1.0675	1.0566	1.0317	0	0	0	1.0317	0	0	0
GCGAAG	1.0801	1.0548	1.02	0	0	0	1.02	0	0	0
UGCAAG	1.0535	1.0512	1.0497	0	0	0	1.0497	0	0	0
GGAGAC	1.0742	1.0618	1.0178	0	0	0	1.0178	0	0	0
GCUCCC	1.0418	1.0379	1.0741	0	0	0	1.0741	0	0	0
GCAGAG	1.0513	1.0675	1.0349	0	0	0	1.0349	0	0	0
CUGAAC	1.0466	1.0563	1.0507	0	0	0	1.0507	0	0	0
CAAGAA	1.0743	1.0474	1.0316	0	0	0	1.0316	0	0	0
UCUGCU	1.0313	1.0603	1.0611	0	0	0	1.0611	0	0	0
AACCCA	1.0444	1.0383	1.0688	0	0	0	1.0688	0	0	0
GGCAAG	1.0575	1.0589	1.0348	0	0	0	1.0348	0	0	0
CGGAAA	1.0728	1.0562	1.0214	0	0	0	1.0214	0	0	0
AAAAGG	1.0922	1.0447	1.0134	0	0	0	1.0134	0	0	0
GGGCGA	1.0579	1.0554	1.0362	0	0	0	1.0362	0	0	0
UGAAGU	1.0442	1.0798	1.0249	0	0	0	1.0249	0	0	0
AGGGCU	1.0525	1.0611	1.0351	0	0	0	1.0351	0	0	0
CUGCCA	1.0305	1.046	1.0717	0	0	0	1.0717	0	0	0
GGAACG	1.0654	1.0617	1.0202	0	0	0	1.0202	0	0	0
AGGGAA	1.0837	1.0522	1.0111	0	0	0	1.0111	0	0	0
UUCGGG	1.0487	1.0636	1.0338	0	0	0	1.0338	0	0	0
AGCCCA	1.0341	1.0316	1.0799	0	0	0	1.0799	0	0	0
AUCCCC	1.0331	1.0503	1.0617	0	0	0	1.0617	0	0	0
ACUGCU	1.0403	1.0557	1.0488	0	0	0	1.0488	0	0	0
ACCGGA	1.0564	1.0482	1.0397	0	0	0	1.0397	0	0	0
GCUUGG	1.0552	1.0451	1.0439	0	0	0	1.0439	0	0	0
AAUGGG	1.0565	1.0575	1.0296	0	0	0	1.0296	0	0	0
GAGUUU	1.0604	1.051	1.0318	0	0	0	1.0318	0	0	0
GCGCGC	1.0421	1.0371	1.0637	0	0	0	1.0637	0	0	0
GAAACU	1.0756	1.0541	1.0131	0	0	0	1.0131	0	0	0
CGCGAC	1.0555	1.0432	1.044	0	0	0	1.044	0	0	0
UAGCCC	1.0318	1.0481	1.0628	0	0	0	1.0628	0	0	0
GGGAGC	1.057	1.0549	1.0299	0	0	0	1.0299	0	0	0
GCGGAG	1.0846	1.0412	1.0152	0	0	0	1.0152	0	0	0
CGAGUU	1.0651	1.0434	1.0321	0	0	0	1.0321	0	0	0
AAUGAG	1.0281	1.0675	1.0445	0	0	0	1.0445	0	0	0
GCGCAC	1.0442	1.0405	1.0546	0	0	0	1.0546	0	0	0
AUUCUA	1.0535	1.0373	1.0484	0	0	0	1.0484	0	0	0
CGAGCA	1.0573	1.0499	1.0301	0	0	0	1.0301	0	0	0
CGGAAC	1.0588	1.0434	1.0345	0	0	0	1.0345	0	0	0
AGCGCC	1.0352	1.031	1.0704	0	0	0	1.0704	0	0	0
GUGACG	1.042	1.0686	1.0258	0	0	0	1.0258	0	0	0
AUUAGA	1.0362	1.0477	1.0523	0	0	0	1.0523	0	0	0
AAACGG	1.0693	1.0376	1.029	0	0	0	1.029	0	0	0
GCGACG	1.0602	1.0507	1.0244	0	0	0	1.0244	0	0	0
UGGUGG	1.037	1.0537	1.0445	0	0	0	1.0445	0	0	0
UUCCUC	1.0158	1.032	1.0866	0	0	0	1.0866	0	0	0
CGCUCG	1.0656	1.0206	1.0475	0	0	0	1.0475	0	0	0
CAUUCG	1.0092	1.0494	1.0739	0	0	0	1.0739	0	0	0
UUGAGU	1.0344	1.0682	1.0298	0	0	0	1.0298	0	0	0
CGCGAA	1.0666	1.0397	1.025	0	0	0	1.025	0	0	0
GGCCUC	1.0381	1.0407	1.0516	0	0	0	1.0516	0	0	0
AAGAAU	1.0622	1.0561	1.0119	0	0	0	1.0119	0	0	0
CAGAAA	1.078	1.0432	1.009	0	0	0	1.009	0	0	0
GCCGCG	1.0261	1.0547	1.0489	0	0	0	1.0489	0	0	0
UUCACG	1.029	1.023	1.0765	0	0	0	1.0765	0	0	0
GACAAA	1.048	1.038	1.0404	0	0	0	1.0404	0	0	0
UUUCUU	1.0017	1.0443	1.0796	0	0	0	1.0796	0	0	0
CCUUGU	1.0259	1.0552	1.0442	0	0	0	1.0442	0	0	0
CUCGCG	1.0415	1.0485	1.0343	0	0	0	1.0343	0	0	0
CAAGAC	1.0482	1.0366	1.0393	0	0	0	1.0393	0	0	0
GUAGAG	1.0541	1.0684	1.0013	0	0	0	1.0013	0	0	0
UUGUAG	1.0597	1.0578	1.0057	0	0	0	1.0057	0	0	0
CACAGA	1.0429	1.0251	1.0542	0	0	0	1.0542	0	0	0
CGGGAU	1.0599	1.052	1.0102	0	0	0	1.0102	0	0	0
CGGCAG	1.047	1.0454	1.0296	0	0	0	1.0296	0	0	0
GGCGAA	1.0682	1.0433	1.0097	0	0	0	1.0097	0	0	0
GCCGAC	1.038	1.0369	1.0455	0	0	0	1.0455	0	0	0
AAAGAA	1.0789	1.042	0.9991	0	0	0	0.9991	0	0	0
GUGGAA	1.0662	1.0485	1.0046	0	0	0	1.0046	0	0	0
GGGCAG	1.0424	1.0426	1.0342	0	0	0	1.0342	0	0	0
GGAGCU	1.0305	1.064	1.0244	0	0	0	1.0244	0	0	0
CGGAAG	1.0793	1.0343	1.0051	0	0	0	1.0051	0	0	0
GGCUAG	1.0476	1.0564	1.0147	0	0	0	1.0147	0	0	0
GUGGUG	1.0233	1.0818	1.0133	0	0	0	1.0133	0	0	0
GGCAAU	1.0317	1.0443	1.042	0	0	0	1.042	0	0	0
AACGGA	1.0632	1.0296	1.0252	0	0	0	1.0252	0	0	0
UUGGGC	1.0482	1.0412	1.0276	0	0	0	1.0276	0	0	0
GAGCAG	1.0482	1.0509	1.0177	0	0	0	1.0177	0	0	0
UCUUGG	1.0129	1.0599	1.0437	0	0	0	1.0437	0	0	0
CCGCAC	1.0435	1.0082	1.0645	0	0	0	1.0645	0	0	0
GCGCCA	1.0178	1.0363	1.0619	0	0	0	1.0619	0	0	0
GGAGCC	1.0449	1.0395	1.0315	0	0	0	1.0315	0	0	0
GCUUUC	1.0182	1.0314	1.0662	0	0	0	1.0662	0	0	0
GCAGCC	1.0189	1.0298	1.0662	0	0	0	1.0662	0	0	0
CAAGAG	1.0548	1.0369	1.0223	0	0	0	1.0223	0	0	0
AGACGC	1.0275	1.0532	1.0332	0	0	0	1.0332	0	0	0
GGGGAG	1.0534	1.0425	1.0177	0	0	0	1.0177	0	0	0
CGGCGC	1.0348	1.0338	1.0448	0	0	0	1.0448	0	0	0
AGUAGA	1.0618	1.0486	1.0014	0	0	0	1.0014	0	0	0
GACCGG	1.042	1.0524	1.0165	0	0	0	1.0165	0	0	0
GCUGCA	1.0246	1.0501	1.0362	0	0	0	1.0362	0	0	0
GAGCGC	1.0385	1.0402	1.0316	0	0	0	1.0316	0	0	0
GAAGCU	1.0512	1.0486	1.0103	0	0	0	1.0103	0	0	0
GGAAGG	1.0602	1.0383	1.0111	0	0	0	1.0111	0	0	0
GGAAGC	1.0563	1.0423	1.0105	0	0	0	1.0105	0	0	0
GGUGCC	1.0246	1.033	1.0515	0	0	0	1.0515	0	0	0
GAAGCA	1.0585	1.0419	1.0084	0	0	0	1.0084	0	0	0
CCUCCA	1.0197	1.0196	1.0688	0	0	0	1.0688	0	0	0
ACUGAA	1.0595	1.0352	1.0132	0	0	0	1.0132	0	0	0
GCGGCG	1.0579	1.0311	1.0189	0	0	0	1.0189	0	0	0
CGAGCG	1.0406	1.0485	1.0187	0	0	0	1.0187	0	0	0
AUACCC	1.0308	1.0244	1.0522	0	0	0	1.0522	0	0	0
AGAAGC	1.0516	1.0442	1.0107	0	0	0	1.0107	0	0	0
AUAUUG	1.0232	1.0362	1.0463	0	0	0	1.0463	0	0	0
GUGCUU	1.0379	1.0438	1.022	0	0	0	1.022	0	0	0
AGACCU	1.0348	1.0433	1.0252	0	0	0	1.0252	0	0	0
CGGAUU	1.0366	1.0515	1.0151	0	0	0	1.0151	0	0	0
UUCCCA	1.0075	1.0322	1.0632	0	0	0	1.0632	0	0	0
GAACGC	1.0317	1.0468	1.0243	0	0	0	1.0243	0	0	0
CGCGGG	1.0371	1.0336	1.0311	0	0	0	1.0311	0	0	0
GAGUGC	1.0362	1.0389	1.0262	0	0	0	1.0262	0	0	0
GGUGCU	1.0279	1.0586	1.0148	0	0	0	1.0148	0	0	0
AGACUC	1.0428	1.0451	1.012	0	0	0	1.012	0	0	0
GCGCCG	1.0273	1.0214	1.0511	0	0	0	1.0511	0	0	0
UGUCCG	1.0232	1.0323	1.0442	0	0	0	1.0442	0	0	0
UGGGUU	1.0285	1.0493	1.0218	0	0	0	1.0218	0	0	0
GUUCGA	1.0324	1.0421	1.0246	0	0	0	1.0246	0	0	0
ACCCUC	1.031	1.0234	1.0443	0	0	0	1.0443	0	0	0
AAAGAG	1.0501	1.0436	1.0046	0	0	0	1.0046	0	0	0
AAUUUU	1.0238	1.0178	1.0551	0	0	0	1.0551	0	0	0
CAUGUG	1.0232	1.0438	1.0296	0	0	0	1.0296	0	0	0
AGGAUU	1.0566	1.0436	0.9947	0	0	0	0.9947	0	0	0
GGCAUC	1.026	1.0375	1.0314	0	0	0	1.0314	0	0	0
UAAAUG	1.0225	1.0199	1.0521	0	0	0	1.0521	0	0	0
UCUAUG	1.0365	1.0225	1.0349	0	0	0	1.0349	0	0	0
UCUCCC	1.0094	1.0325	1.0516	0	0	0	1.0516	0	0	0
GGGGGA	1.0254	1.0538	1.0139	0	0	0	1.0139	0	0	0
ACUGGA	1.0428	1.0401	1.0099	0	0	0	1.0099	0	0	0
CCAACC	1.02	1.0141	1.058	0	0	0	1.058	0	0	0
GUAAUU	1.0791	1.0132	0.9993	0	0	0	0.9993	0	0	0
GAGGGG	1.02	1.0604	1.0111	0	0	0	1.0111	0	0	0
AAUGCC	0.9989	1.0215	1.0707	0	0	0	1.0707	0	0	0
CGACCG	1.0378	1.029	1.0235	0	0	0	1.0235	0	0	0
UUUAUG	1.0047	1.0358	1.0498	0	0	0	1.0498	0	0	0
ACCGCG	1.0259	1.0277	1.0352	0	0	0	1.0352	0	0	0
CACCGC	1.009	1.0095	1.0701	0	0	0	1.0701	0	0	0
GAACAA	1.0574	1.0231	1.0077	0	0	0	1.0077	0	0	0
CUCCAC	1.0192	1.0226	1.0457	0	0	0	1.0457	0	0	0
GGGAGG	1.0513	1.0369	0.9987	0	0	0	0.9987	0	0	0
GACAGG	1.0378	1.0363	1.0123	0	0	0	1.0123	0	0	0
AAAGCC	1.0346	1.0186	1.0327	0	0	0	1.0327	0	0	0
GCAGCG	1.0321	1.0223	1.0308	0	0	0	1.0308	0	0	0
GCGAAU	1.0363	1.0314	1.0165	0	0	0	1.0165	0	0	0
GCUUCC	1.0002	1.0367	1.0465	0	0	0	1.0465	0	0	0
CACGCC	1.0158	1.0124	1.055	0	0	0	1.055	0	0	0
GACCGC	1.0267	1.0272	1.0281	0	0	0	1.0281	0	0	0
GGACUA	1.0418	1.0321	1.0079	0	0	0	1.0079	0	0	0
GGCCAC	1.0239	1.0204	1.0373	0	0	0	1.0373	0	0	0
GGGACA	1.0258	1.0317	1.0234	0	0	0	1.0234	0	0	0
CUUUCG	1.0038	1.0185	1.0581	0	0	0	1.0581	0	0	0
GGACCA	1.0417	1.0192	1.0194	0	0	0	1.0194	0	0	0
CCCCUU	1.0087	1.0323	1.0392	0	0	0	1.0392	0	0	0
AGCUGU	1.0216	1.042	1.0156	0	0	0	1.0156	0	0	0
CGGCCG	1.0171	1.0356	1.0259	0	0	0	1.0259	0	0	0
GCAGGC	1.0334	1.0171	1.0279	0	0	0	1.0279	0	0	0
AAGUUG	1.0248	1.0343	1.018	0	0	0	1.018	0	0	0
CCCUUC	0.9959	1.0209	1.0602	0	0	0	1.0602	0	0	0
CCGGAU	1.0285	1.0359	1.0122	0	0	0	1.0122	0	0	0
GAGCCG	1.0263	1.0322	1.0165	0	0	0	1.0165	0	0	0
GCAUUC	1.0056	1.0237	1.0455	0	0	0	1.0455	0	0	0
CCUGGU	1.002	1.0471	1.0254	0	0	0	1.0254	0	0	0
GGGGAU	1.039	1.0377	0.9978	0	0	0	0.9978	0	0	0
CUUGGA	1.0182	1.0427	1.0134	0	0	0	1.0134	0	0	0
CUCGCC	1.0128	1.019	1.0411	0	0	0	1.0411	0	0	0
GCGCAG	1.0111	1.03	1.0313	0	0	0	1.0313	0	0	0
CGCGGA	1.0593	1.0169	0.9958	0	0	0	0.9958	0	0	0
GGCCUU	1.0003	1.0344	1.0373	0	0	0	1.0373	0	0	0
UUCGAA	1.0217	1.0373	1.0129	0	0	0	1.0129	0	0	0
UGGAUU	1.0232	1.0381	1.0094	0	0	0	1.0094	0	0	0
CACGGG	1.0339	1.0173	1.0186	0	0	0	1.0186	0	0	0
AAUGAA	1.0284	1.0238	1.0169	0	0	0	1.0169	0	0	0
CUACGA	1.0131	1.0361	1.0196	0	0	0	1.0196	0	0	0
GUGAGA	1.026	1.0586	0.984	0	0	0	0.984	0	0	0
CGCUGC	1.0062	1.016	1.046	0	0	0	1.046	0	0	0
CAGACU	1.0293	1.0277	1.0105	0	0	0	1.0105	0	0	0
CAAAAG	1.0375	1.0158	1.0134	0	0	0	1.0134	0	0	0
GCGAAC	1.0356	1.0288	1.0022	0	0	0	1.0022	0	0	0
CCAAGC	1.0282	1.0062	1.0317	0	0	0	1.0317	0	0	0
CAGAAG	1.0577	1.0426	0.9652	0	0	0	0.9652	0	0	0
GGCCAA	1.0251	1.0184	1.0218	0	0	0	1.0218	0	0	0
GGCGAC	1.0192	1.0334	1.012	0	0	0	1.012	0	0	0
CGCCUU	1.0024	1.016	1.0462	0	0	0	1.0462	0	0	0
UGUGCA	1.0105	1.0389	1.0142	0	0	0	1.0142	0	0	0
GAGGGC	1.0226	1.0538	0.9848	0	0	0	0.9848	0	0	0
CGAACU	1.0383	1.0246	0.9982	0	0	0	0.9982	0	0	0
ACGGGC	1.0278	1.0087	1.0245	0	0	0	1.0245	0	0	0
AAAAAA	1.0608	0.9857	1.014	0	0	0	1.014	0	0	0
CAUCGA	1.0059	1.0272	1.027	0	0	0	1.027	0	0	0
AGGUUG	1.0291	1.0375	0.9931	0	0	0	0.9931	0	0	0
AGGCGA	1.0203	1.0292	1.0102	0	0	0	1.0102	0	0	0
GGGGAC	1.0349	1.0232	1.0007	0	0	0	1.0007	0	0	0
AGCAGA	1.0364	1.0431	0.9792	0	0	0	0.9792	0	0	0
CGAAAC	1.0322	1.0193	1.0068	0	0	0	1.0068	0	0	0
AGUGAC	1.0054	1.0372	1.0157	0	0	0	1.0157	0	0	0
CGACCU	1.0127	1.0198	1.0257	0	0	0	1.0257	0	0	0
AAGGAC	1.0442	1.005	1.0084	0	0	0	1.0084	0	0	0
UGGAGU	1.009	1.0435	1.0049	0	0	0	1.0049	0	0	0
GCCAAG	1.0318	0.9949	1.0296	0	0	0	1.0296	0	0	0
UGGACG	1.02	1.0209	1.0148	0	0	0	1.0148	0	0	0
AAACCG	1.0342	1.0142	1.0068	0	0	0	1.0068	0	0	0
ACGGCC	0.9949	1.0379	1.0215	0	0	0	1.0215	0	0	0
CGGACA	1.0175	1.0072	1.0293	0	0	0	1.0293	0	0	0
AAAUUC	1.014	1.0068	1.0324	0	0	0	1.0324	0	0	0
AGCGUG	1.0124	1.0286	1.0117	0	0	0	1.0117	0	0	0
GUUCCC	0.9914	1.0297	1.0314	0	0	0	1.0314	0	0	0
GCCCAU	1	1.0198	1.0322	0	0	0	1.0322	0	0	0
GAAAUC	1.0638	1.0088	0.9787	0	0	0	0.9787	0	0	0
AUUACG	1.0019	1.022	1.0272	0	0	0	1.0272	0	0	0
AACGAG	1.031	1.032	0.9877	0	0	0	0.9877	0	0	0
GUUGAC	1.0215	1.0185	1.0104	0	0	0	1.0104	0	0	0
CAGGAC	1.0082	1.0183	1.0239	0	0	0	1.0239	0	0	0
AGACUU	1.0147	1.0339	1.0016	0	0	0	1.0016	0	0	0
CGCGCG	1.0054	1.0186	1.0261	0	0	0	1.0261	0	0	0
UGUGGG	0.9994	1.05	1.0006	0	0	0	1.0006	0	0	0
GACGCA	1.0146	1.0203	1.015	0	0	0	1.015	0	0	0
AUUUAG	0.999	1.0197	1.0312	0	0	0	1.0312	0	0	0
GACCUU	1.0062	1.0148	1.0288	0	0	0	1.0288	0	0	0
GCAGGG	1.0039	1.0414	1.0039	0	0	0	1.0039	0	0	0
ACGAUC	0.9984	1.0017	1.0487	0	0	0	1.0487	0	0	0
ACUGCA	1.0186	1.0184	1.0115	0	0	0	1.0115	0	0	0
CGCUGU	1.0109	1.0252	1.0123	0	0	0	1.0123	0	0	0
GAACGG	1.0319	1.029	0.9874	0	0	0	0.9874	0	0	0
CAAGUG	1.0189	1.0064	1.0216	0	0	0	1.0216	0	0	0
UUGGUU	1.0074	1.0332	1.0063	0	0	0	1.0063	0	0	0
GCCGAA	1.0277	1.018	0.9999	0	0	0	0.9999	0	0	0
GAAACA	1.027	1.0233	0.9952	0	0	0	0.9952	0	0	0
UUCUUC	0.9781	1.0237	1.0435	0	0	0	1.0435	0	0	0
GCGGAU	1.0391	1.0226	0.983	0	0	0	0.983	0	0	0
CAGCCG	1.0035	1.005	1.0362	0	0	0	1.0362	0	0	0
AAUUGG	1.0025	1.0225	1.0194	0	0	0	1.0194	0	0	0
GCACUU	1.0104	1.0189	1.0146	0	0	0	1.0146	0	0	0
UGCAAC	1.0038	1.0091	1.0309	0	0	0	1.0309	0	0	0
GACUCU	1.0153	1.0183	1.0098	0	0	0	1.0098	0	0	0
UCCCCA	0.9984	1.0171	1.0279	0	0	0	1.0279	0	0	0
CUCCUC	0.9879	1.0181	1.0368	0	0	0	1.0368	0	0	0
CGAAGC	1.0326	1.0136	0.9964	0	0	0	0.9964	0	0	0
CGCCUC	0.981	1.0111	1.0504	0	0	0	1.0504	0	0	0
UCACCU	0.999	1.0005	1.0428	0	0	0	1.0428	0	0	0
CGACAU	1.0036	1.0244	1.014	0	0	0	1.014	0	0	0
AGCGAC	1.0146	1.0161	1.011	0	0	0	1.011	0	0	0
CGCGGC	1.0267	1.0063	1.0086	0	0	0	1.0086	0	0	0
CUUUCC	0.988	1.0119	1.0417	0	0	0	1.0417	0	0	0
GGCCGC	1.0206	1.004	1.0169	0	0	0	1.0169	0	0	0
CCGCCA	0.9879	1.0036	1.05	0	0	0	1.05	0	0	0
AUCUGG	1.0199	1.0199	1.0014	0	0	0	1.0014	0	0	0
GACGGC	1.0045	1.0393	0.9973	0	0	0	0.9973	0	0	0
CACUGU	1.0157	1.0228	1.0022	0	0	0	1.0022	0	0	0
ACCACG	1.0135	0.9979	1.029	0	0	0	1.029	0	0	0
UUCGGA	1.0127	1.0048	1.0229	0	0	0	1.0229	0	0	0
GCGGGU	0.998	1.0364	1.0058	0	0	0	1.0058	0	0	0
GGGCUU	1.0074	1.0217	1.0106	0	0	0	1.0106	0	0	0
UACCGA	1.0027	1.0173	1.0191	0	0	0	1.0191	0	0	0
CCCGUU	1.0079	1.0129	1.0181	0	0	0	1.0181	0	0	0
UCCAAG	1.0249	1.0129	1.001	0	0	0	1.001	0	0	0
AUUCAU	0.9935	1.0039	1.0409	0	0	0	1.0409	0	0	0
CCCUAG	1.0038	1.0217	1.0126	0	0	0	1.0126	0	0	0
AUGUCA	1.0174	0.9964	1.024	0	0	0	1.024	0	0	0
UCCACG	0.9941	1.0147	1.0289	0	0	0	1.0289	0	0	0
AGGACC	1.0192	1.0174	1.001	0	0	0	1.001	0	0	0
CCAAUU	0.9994	1.0113	1.0267	0	0	0	1.0267	0	0	0
GGCGGG	1.0236	1.031	0.9825	0	0	0	0.9825	0	0	0
ACGACC	1.0187	1.007	1.0111	0	0	0	1.0111	0	0	0
GGCAAA	1.0144	1.0209	1.001	0	0	0	1.001	0	0	0
CAGACC	1.0076	1.0102	1.0182	0	0	0	1.0182	0	0	0
ACCGAC	1.0117	1.0062	1.0181	0	0	0	1.0181	0	0	0
CUCUGC	1.0091	1.0036	1.0226	0	0	0	1.0226	0	0	0
GGGCUA	1.0076	1.0315	0.9955	0	0	0	0.9955	0	0	0
CUUGGU	1.0014	1.0382	0.995	0	0	0	0.995	0	0	0
UCUGAA	1.0114	1.0331	0.9898	0	0	0	0.9898	0	0	0
CACCAC	1.0011	0.9833	1.0498	0	0	0	1.0498	0	0	0
CUGGGU	1.0189	1.0241	0.9911	0	0	0	0.9911	0	0	0
UAGAGC	1.006	1.0423	0.9858	0	0	0	0.9858	0	0	0
UGCAAA	1.0253	0.9988	1.0098	0	0	0	1.0098	0	0	0
AAAAAC	1.0387	0.9981	0.9959	0	0	0	0.9959	0	0	0
AGCUAU	1.0354	1.0131	0.9836	0	0	0	0.9836	0	0	0
CGGAGC	1.0157	1.0144	1.0015	0	0	0	1.0015	0	0	0
AACGCC	1.0056	1.0052	1.0208	0	0	0	1.0208	0	0	0
GGUUCC	0.9817	1.019	1.0308	0	0	0	1.0308	0	0	0
GCCAGG	1.0041	1.0097	1.017	0	0	0	1.017	0	0	0
AGUCUG	1.0336	1.0156	0.9815	0	0	0	0.9815	0	0	0
CGAUCA	0.9841	0.994	1.0526	0	0	0	1.0526	0	0	0
AUAGGC	0.9979	1.0267	1.0057	0	0	0	1.0057	0	0	0
AAGAAA	1.0446	1.006	0.9794	0	0	0	0.9794	0	0	0
CACGUG	1.0088	1.0101	1.011	0	0	0	1.011	0	0	0
UUGUGC	0.9885	1.0222	1.019	0	0	0	1.019	0	0	0
GGACGG	1.0155	1.018	0.9958	0	0	0	0.9958	0	0	0
AAAGGA	1.042	1.0098	0.9774	0	0	0	0.9774	0	0	0
GUGACC	0.9939	1.0294	1.0059	0	0	0	1.0059	0	0	0
GCCUUU	0.9704	1.0238	1.0348	0	0	0	1.0348	0	0	0
AGAGGA	1.0554	1.0051	0.9684	0	0	0	0.9684	0	0	0
ACCGGC	1.0032	1.0098	1.0157	0	0	0	1.0157	0	0	0
CGCGCU	1.0008	1.0014	1.0263	0	0	0	1.0263	0	0	0
CGAAAG	1.0469	1.0209	0.9601	0	0	0	0.9601	0	0	0
GGUGAC	1.0061	1.0384	0.9826	0	0	0	0.9826	0	0	0
UUCCUU	0.9775	1.0164	1.0325	0	0	0	1.0325	0	0	0
GGGGCG	1.0265	1.0032	0.9966	0	0	0	0.9966	0	0	0
AUGGUA	1.0034	1.0142	1.0078	0	0	0	1.0078	0	0	0
GCCAGC	0.9865	1.0021	1.0368	0	0	0	1.0368	0	0	0
UGUUCU	0.9925	1.0296	1.0025	0	0	0	1.0025	0	0	0
UUUUUU	0.9829	0.9915	1.0499	0	0	0	1.0499	0	0	0
GAAGGA	1.0578	1.006	0.9604	0	0	0	0.9604	0	0	0
GACUCA	1.0269	1.0022	0.995	0	0	0	0.995	0	0	0
AACUGU	1.0184	1.0168	0.9886	0	0	0	0.9886	0	0	0
CAAAAA	1.0322	0.9881	1.0032	0	0	0	1.0032	0	0	0
CUUUGG	0.9755	1.0365	1.0113	0	0	0	1.0113	0	0	0
ACCGAA	1.0281	1.0069	0.9878	0	0	0	0.9878	0	0	0
CGUGAC	0.9951	1.0168	1.0109	0	0	0	1.0109	0	0	0
GACGGG	1.0223	1.0203	0.9801	0	0	0	0.9801	0	0	0
AAGAAG	1.0517	1.0163	0.9538	0	0	0	0.9538	0	0	0
GAGUCC	1.0103	1.0255	0.9856	0	0	0	0.9856	0	0	0
GGAGCG	1.0126	1.0148	0.9938	0	0	0	0.9938	0	0	0
UCAAGA	1.0011	1.0005	1.0185	0	0	0	1.0185	0	0	0
GCUUUU	0.9839	1.0235	1.0126	0	0	0	1.0126	0	0	0
UUCAGC	0.9885	0.9875	1.0438	0	0	0	1.0438	0	0	0
AACUGC	1.0077	1.0088	1.0031	0	0	0	1.0031	0	0	0
CUCUCC	0.9977	0.9978	1.0236	0	0	0	1.0236	0	0	0
CUGUCC	0.9955	1.0048	1.0185	0	0	0	1.0185	0	0	0
UCUUCC	0.9784	1.0141	1.0262	0	0	0	1.0262	0	0	0
CGGGCG	1.0191	1.0076	0.9918	0	0	0	0.9918	0	0	0
GGGACG	1.0068	1.0154	0.9956	0	0	0	0.9956	0	0	0
GUCCCG	1.0051	1.0081	1.0039	0	0	0	1.0039	0	0	0
GCCCUU	0.9712	1.0161	1.0291	0	0	0	1.0291	0	0	0
CGACUU	0.9997	1.0234	0.993	0	0	0	0.993	0	0	0
CUAGAA	1.0368	1.0175	0.9617	0	0	0	0.9617	0	0	0
ACGGGA	1.0272	1.0158	0.9727	0	0	0	0.9727	0	0	0
GCCAAA	1.0049	0.995	1.0157	0	0	0	1.0157	0	0	0
GGAUGG	1.0222	1.0041	0.9892	0	0	0	0.9892	0	0	0
AUGUAC	1.0037	1.0047	1.006	0	0	0	1.006	0	0	0
AUGCAU	1.0091	0.9931	1.0115	0	0	0	1.0115	0	0	0
AAAUGG	0.9978	1.0183	0.9976	0	0	0	0.9976	0	0	0
GGGCCG	1.0026	1.012	0.9985	0	0	0	0.9985	0	0	0
AGACAG	1.013	1.0109	0.9884	0	0	0	0.9884	0	0	0
GGCCGG	0.9956	1.0128	1.0039	0	0	0	1.0039	0	0	0
AGCGAG	1.0061	1.0229	0.9831	0	0	0	0.9831	0	0	0
GGGCCA	0.9933	1.0151	1.0037	0	0	0	1.0037	0	0	0
UAGACC	1.0054	1.0157	0.9905	0	0	0	0.9905	0	0	0
GGCUUC	1.0027	1.0005	1.0084	0	0	0	1.0084	0	0	0
ACUGUU	1.006	1.0139	0.9912	0	0	0	0.9912	0	0	0
GGUUCU	0.9887	1.0375	0.9849	0	0	0	0.9849	0	0	0
ACGCCU	0.9732	1.0116	1.0257	0	0	0	1.0257	0	0	0
UCCAGG	1.0043	1.0045	1.0009	0	0	0	1.0009	0	0	0
GUGGCA	0.9901	1.0227	0.9967	0	0	0	0.9967	0	0	0
CCUCGC	0.9914	0.9964	1.0211	0	0	0	1.0211	0	0	0
UGGUUC	0.9989	1.004	1.0058	0	0	0	1.0058	0	0	0
GGAGGC	1.0212	1.0133	0.9741	0	0	0	0.9741	0	0	0
GCUGGA	1.0174	1.0072	0.9834	0	0	0	0.9834	0	0	0
AACUGG	1.0078	1.0251	0.9749	0	0	0	0.9749	0	0	0
CACUGC	0.9923	1.0021	1.013	0	0	0	1.013	0	0	0
GGCGGC	1.0146	1.01	0.9826	0	0	0	0.9826	0	0	0
GAGGCG	1.01	1.0186	0.9784	0	0	0	0.9784	0	0	0
UCCAAA	1.0157	0.9842	1.0065	0	0	0	1.0065	0	0	0
AACCGG	1.0225	0.9994	0.9831	0	0	0	0.9831	0	0	0
AACGGC	0.9944	1.0147	0.9953	0	0	0	0.9953	0	0	0
GGAAAC	1.0197	1.0074	0.9771	0	0	0	0.9771	0	0	0
GUCCCC	0.9959	1.0008	1.0069	0	0	0	1.0069	0	0	0
ACGACU	1.01	1.0082	0.9847	0	0	0	0.9847	0	0	0
GCAGGA	0.9942	1.0111	0.9971	0	0	0	0.9971	0	0	0
GGAGGA	1.0337	1.0236	0.945	0	0	0	0.945	0	0	0
AAAAGC	1.024	0.9939	0.9843	0	0	0	0.9843	0	0	0
CGACAG	1.0058	0.998	0.998	0	0	0	0.998	0	0	0
GGGCGC	1.0004	1.0017	0.9995	0	0	0	0.9995	0	0	0
GCAAAA	1.0186	0.9891	0.9937	0	0	0	0.9937	0	0	0
GCAACC	0.9982	0.9871	1.0159	0	0	0	1.0159	0	0	0
CAGGUG	0.9994	1.0077	0.9939	0	0	0	0.9939	0	0	0
AAAGGC	1.016	1.0062	0.9781	0	0	0	0.9781	0	0	0
UGUUUU	0.99	1.0016	1.0087	0	0	0	1.0087	0	0	0
GAAGGG	1.0214	1.0217	0.957	0	0	0	0.957	0	0	0
GUGCCU	0.971	1.0149	1.0141	0	0	0	1.0141	0	0	0
CAGGGA	1.0079	1	0.9914	0	0	0	0.9914	0	0	0
GGGUUC	0.998	1.0092	0.9917	0	0	0	0.9917	0	0	0
AGACAU	0.9968	1.0042	0.9974	0	0	0	0.9974	0	0	0
AGCACU	1.0068	0.9997	0.9899	0	0	0	0.9899	0	0	0
UCCAGC	0.9829	0.9964	1.0171	0	0	0	1.0171	0	0	0
AGGAAA	1.0193	1.0172	0.9596	0	0	0	0.9596	0	0	0
CACGCG	1.0007	0.9871	1.0083	0	0	0	1.0083	0	0	0
GGAGGG	1.0113	1.0166	0.9682	0	0	0	0.9682	0	0	0
AAUCGA	1.004	0.9992	0.9923	0	0	0	0.9923	0	0	0
ACCGCC	0.9848	0.9825	1.0279	0	0	0	1.0279	0	0	0
UGGGUA	0.987	1.0193	0.9886	0	0	0	0.9886	0	0	0
UGUAGU	0.9961	1.0152	0.9834	0	0	0	0.9834	0	0	0
GGACGC	0.9874	0.9981	1.0092	0	0	0	1.0092	0	0	0
CCGGUU	0.9802	1.0194	0.995	0	0	0	0.995	0	0	0
GUAUUG	1.0222	1.0042	0.9678	0	0	0	0.9678	0	0	0
UAGACU	0.9998	1.0095	0.9841	0	0	0	0.9841	0	0	0
AGGAAC	1.0146	1.0072	0.9715	0	0	0	0.9715	0	0	0
GAGGGU	1.0254	1.0005	0.9665	0	0	0	0.9665	0	0	0
CAGGAA	1.0014	1.0118	0.9786	0	0	0	0.9786	0	0	0
GGCGCA	1.0175	0.9823	0.9919	0	0	0	0.9919	0	0	0
AGCCCU	0.9911	0.9991	1.0011	0	0	0	1.0011	0	0	0
GGGUGC	0.9891	1.011	0.9912	0	0	0	0.9912	0	0	0
CUCGUG	1.0095	0.9831	0.998	0	0	0	0.998	0	0	0
ACAAGA	0.9881	0.9973	1.0052	0	0	0	1.0052	0	0	0
GGGUAG	0.9845	1.027	0.9787	0	0	0	0.9787	0	0	0
UUCCCU	0.9765	1.0015	1.0119	0	0	0	1.0119	0	0	0
CACCAA	0.9984	0.9757	1.0157	0	0	0	1.0157	0	0	0
GGGGUU	0.9844	1.0062	0.9991	0	0	0	0.9991	0	0	0
UCGACC	1.0042	0.9891	0.9958	0	0	0	0.9958	0	0	0
ACGGUG	0.9821	1.0225	0.9844	0	0	0	0.9844	0	0	0
GGCUUU	0.9806	1.013	0.9951	0	0	0	0.9951	0	0	0
GGGAGU	0.9872	1.0229	0.9785	0	0	0	0.9785	0	0	0
CGGUAG	0.9948	1.0211	0.9714	0	0	0	0.9714	0	0	0
GAGUAG	1.0153	0.9937	0.9777	0	0	0	0.9777	0	0	0
GAGAUC	1.0211	0.9983	0.9673	0	0	0	0.9673	0	0	0
GGCAUU	0.9812	1.0152	0.9894	0	0	0	0.9894	0	0	0
UCUGGA	0.9916	1.0124	0.9808	0	0	0	0.9808	0	0	0
AGAGUU	1.0186	0.9933	0.9724	0	0	0	0.9724	0	0	0
GCUUCG	0.9882	0.992	1.0012	0	0	0	1.0012	0	0	0
CGCUGG	1.0027	0.9972	0.9806	0	0	0	0.9806	0	0	0
UGUCCU	0.9856	1.0063	0.9883	0	0	0	0.9883	0	0	0
ACCUGU	0.9908	0.9963	0.993	0	0	0	0.993	0	0	0
UUGGUA	1.0075	0.9932	0.9791	0	0	0	0.9791	0	0	0
GGGUGG	0.9984	1.0192	0.9622	0	0	0	0.9622	0	0	0
CGACUC	0.9899	1.004	0.9859	0	0	0	0.9859	0	0	0
ACCCAU	0.9889	0.9827	1.0067	0	0	0	1.0067	0	0	0
CAAACG	1.0086	0.9663	1.0031	0	0	0	1.0031	0	0	0
AGGACA	0.9985	0.991	0.9883	0	0	0	0.9883	0	0	0
AGAUCC	0.9787	0.9984	1.0005	0	0	0	1.0005	0	0	0
GCCUAG	0.9893	0.9884	0.9996	0	0	0	0.9996	0	0	0
AGGAAU	0.9978	1.005	0.9742	0	0	0	0.9742	0	0	0
AAGACG	0.9987	1.0173	0.9605	0	0	0	0.9605	0	0	0
UUUUCA	0.9445	0.9891	1.0419	0	0	0	1.0419	0	0	0
AGCUCC	0.9818	0.9912	1.0023	0	0	0	1.0023	0	0	0
CAGAGC	0.9795	0.9978	0.998	0	0	0	0.998	0	0	0
GGCACA	0.9988	0.9801	0.9948	0	0	0	0.9948	0	0	0
AGAGCA	0.9916	1.0142	0.9679	0	0	0	0.9679	0	0	0
AGGCCU	0.9809	0.995	0.9978	0	0	0	0.9978	0	0	0
CUGGAU	0.9946	0.9927	0.9862	0	0	0	0.9862	0	0	0
UCGACU	0.997	0.9985	0.9777	0	0	0	0.9777	0	0	0
UCGCGC	0.9902	0.9877	0.9945	0	0	0	0.9945	0	0	0
GAAUGU	0.9986	1.0017	0.9719	0	0	0	0.9719	0	0	0
GUUCCG	0.9796	1.001	0.9911	0	0	0	0.9911	0	0	0
AGGCGC	0.9997	0.9831	0.9887	0	0	0	0.9887	0	0	0
ACGAGC	0.9943	1.0073	0.9697	0	0	0	0.9697	0	0	0
GGUAGG	1.0161	0.9931	0.962	0	0	0	0.962	0	0	0
GGACAA	0.9822	0.9941	0.9946	0	0	0	0.9946	0	0	0
GGUGAA	1.0013	1.0156	0.9539	0	0	0	0.9539	0	0	0
AAAAUU	0.9948	0.9888	0.9868	0	0	0	0.9868	0	0	0
ACUCCC	0.9944	0.9784	0.9973	0	0	0	0.9973	0	0	0
CCAAAC	1.0039	0.9638	1.002	0	0	0	1.002	0	0	0
AAAGCG	1.0077	0.995	0.9668	0	0	0	0.9668	0	0	0
GAGCAU	0.9854	1.0086	0.9753	0	0	0	0.9753	0	0	0
AAUCCG	0.99	0.9895	0.9897	0	0	0	0.9897	0	0	0
CAGAUA	0.96	0.9883	1.0209	0	0	0	1.0209	0	0	0
AUUAGG	0.9747	0.9945	0.9993	0	0	0	0.9993	0	0	0
CGGGCA	0.9887	0.9836	0.9959	0	0	0	0.9959	0	0	0
CUGUAA	1.0231	0.9965	0.948	0	0	0	0.948	0	0	0
UCGAGC	0.9953	0.9938	0.9785	0	0	0	0.9785	0	0	0
AGAGGC	0.9796	1.0107	0.9773	0	0	0	0.9773	0	0	0
AGCUGC	0.9751	0.9958	0.9965	0	0	0	0.9965	0	0	0
CGGCCA	0.9822	0.9819	1.003	0	0	0	1.003	0	0	0
GGACCU	0.9991	0.986	0.9818	0	0	0	0.9818	0	0	0
AAGAGC	0.9989	0.9948	0.973	0	0	0	0.973	0	0	0
UUGGGU	0.9685	1.01	0.9882	0	0	0	0.9882	0	0	0
CCUAGG	0.9935	1.0054	0.9675	0	0	0	0.9675	0	0	0
AGAAUC	1.0147	0.993	0.9576	0	0	0	0.9576	0	0	0
GGGGGU	0.9914	0.9934	0.9802	0	0	0	0.9802	0	0	0
GACAGU	1.0027	0.9951	0.9666	0	0	0	0.9666	0	0	0
GAAUCU	1.0044	0.9945	0.9651	0	0	0	0.9651	0	0	0
CGCCAC	0.9724	0.9776	1.0135	0	0	0	1.0135	0	0	0
GGCUCU	0.9757	1.002	0.9856	0	0	0	0.9856	0	0	0
AGAUAA	0.9363	1.0029	1.024	0	0	0	1.024	0	0	0
ACGGAA	0.9964	0.9902	0.9753	0	0	0	0.9753	0	0	0
CAAACC	0.9899	0.9634	1.0076	0	0	0	1.0076	0	0	0
AAGCCU	0.9669	0.9839	1.0101	0	0	0	1.0101	0	0	0
CAGCCU	0.9691	0.9811	1.0101	0	0	0	1.0101	0	0	0
CCCAAU	0.9746	0.9844	1.0012	0	0	0	1.0012	0	0	0
GGAGCA	1.0011	0.9881	0.9709	0	0	0	0.9709	0	0	0
CGAGGU	1.0105	1.007	0.9416	0	0	0	0.9416	0	0	0
CUGCUC	0.9681	0.9816	1.0094	0	0	0	1.0094	0	0	0
GCACAC	0.9859	0.9699	1.0028	0	0	0	1.0028	0	0	0
UCCGCA	0.9661	0.9818	1.01	0	0	0	1.01	0	0	0
AGGCUC	0.9878	0.9838	0.9862	0	0	0	0.9862	0	0	0
ACGGCU	0.9767	1.0028	0.9783	0	0	0	0.9783	0	0	0
CGGGGU	0.989	0.994	0.9739	0	0	0	0.9739	0	0	0
UCCGCU	0.9725	0.9824	1.0015	0	0	0	1.0015	0	0	0
CAAUUC	0.9647	0.9803	1.0111	0	0	0	1.0111	0	0	0
CCUCAG	0.9386	0.9975	1.0196	0	0	0	1.0196	0	0	0
AAGGCC	0.9856	0.9883	0.981	0	0	0	0.981	0	0	0
AGCGGA	1.012	0.9765	0.9659	0	0	0	0.9659	0	0	0
UGUACC	0.9788	0.9942	0.9814	0	0	0	0.9814	0	0	0
CCCCGU	0.9803	0.9784	0.9954	0	0	0	0.9954	0	0	0
UACCCC	0.9708	0.9867	0.9965	0	0	0	0.9965	0	0	0
CGCCAG	0.966	0.9822	1.0055	0	0	0	1.0055	0	0	0
CAGGCC	0.9717	0.981	1.0009	0	0	0	1.0009	0	0	0
CACGGC	0.9754	0.9922	0.985	0	0	0	0.985	0	0	0
CAGACA	0.9817	0.9794	0.9913	0	0	0	0.9913	0	0	0
UUGUGG	0.9626	1.0098	0.9799	0	0	0	0.9799	0	0	0
GCGAGU	0.9917	1.0051	0.9542	0	0	0	0.9542	0	0	0
ACAGUG	0.976	0.9851	0.9898	0	0	0	0.9898	0	0	0
GCUGGU	0.971	1.0081	0.9718	0	0	0	0.9718	0	0	0
CUUCCA	0.9708	0.9911	0.9888	0	0	0	0.9888	0	0	0
AGCGGC	0.9764	0.9952	0.9782	0	0	0	0.9782	0	0	0
UCUAGA	0.9843	0.9987	0.9664	0	0	0	0.9664	0	0	0
UUACCC	0.967	0.9839	0.9977	0	0	0	0.9977	0	0	0
UGCCGG	0.9544	0.9929	1.0013	0	0	0	1.0013	0	0	0
AGAUAU	0.9618	0.9834	1.0033	0	0	0	1.0033	0	0	0
CUCGGC	0.9836	0.9928	0.9719	0	0	0	0.9719	0	0	0
AGAAGG	1.0172	1.0004	0.9306	0	0	0	0.9306	0	0	0
CUGCAA	0.9723	0.9805	0.9951	0	0	0	0.9951	0	0	0
CAGGGG	0.9804	0.9894	0.9771	0	0	0	0.9771	0	0	0
CCGUAG	0.9937	0.9946	0.9583	0	0	0	0.9583	0	0	0
CAAGCC	0.9682	0.9718	1.0064	0	0	0	1.0064	0	0	0
UGAGUC	0.9889	0.9969	0.9594	0	0	0	0.9594	0	0	0
AGCGCU	0.975	0.9856	0.9842	0	0	0	0.9842	0	0	0
UCCUCG	0.965	0.9913	0.9882	0	0	0	0.9882	0	0	0
GCUCCA	0.9718	0.9824	0.9902	0	0	0	0.9902	0	0	0
GUGGCC	0.9872	0.9807	0.9758	0	0	0	0.9758	0	0	0
UGCACA	0.983	0.97	0.9906	0	0	0	0.9906	0	0	0
AGCCUC	0.969	0.9717	1.0029	0	0	0	1.0029	0	0	0
AAGAUA	0.9435	0.9967	1.0025	0	0	0	1.0025	0	0	0
GGCCAU	0.9701	0.9907	0.9818	0	0	0	0.9818	0	0	0
UAGAUA	0.937	0.995	1.01	0	0	0	1.01	0	0	0
GUGAAU	0.9949	1.0033	0.9436	0	0	0	0.9436	0	0	0
CAUGAG	0.9779	0.9842	0.9792	0	0	0	0.9792	0	0	0
AACCCU	0.9739	0.9803	0.9869	0	0	0	0.9869	0	0	0
UUCUCU	0.9612	0.9842	0.9955	0	0	0	0.9955	0	0	0
CGACCA	0.9805	0.9755	0.9846	0	0	0	0.9846	0	0	0
UGCAUU	0.9664	0.9854	0.9887	0	0	0	0.9887	0	0	0
GGGCGG	0.9971	0.9856	0.9575	0	0	0	0.9575	0	0	0
CAACGG	0.9875	0.9836	0.9687	0	0	0	0.9687	0	0	0
GGGCCU	0.9686	0.978	0.9932	0	0	0	0.9932	0	0	0
GCUGUC	0.9568	0.9961	0.9867	0	0	0	0.9867	0	0	0
UAGCGC	0.9621	0.9869	0.9902	0	0	0	0.9902	0	0	0
GACAAU	0.9685	0.9854	0.9851	0	0	0	0.9851	0	0	0
GCAGCU	0.9661	0.9929	0.9798	0	0	0	0.9798	0	0	0
AGGGGA	0.9988	0.9891	0.9501	0	0	0	0.9501	0	0	0
CUAGAG	0.9891	0.9995	0.9494	0	0	0	0.9494	0	0	0
ACGACA	0.9822	0.9799	0.9756	0	0	0	0.9756	0	0	0
UAAUGG	1.005	0.9853	0.9472	0	0	0	0.9472	0	0	0
ACGAGG	0.9915	0.9994	0.9464	0	0	0	0.9464	0	0	0
CCCUCU	0.9823	0.9747	0.9803	0	0	0	0.9803	0	0	0
CAAGGA	1.0008	0.9728	0.963	0	0	0	0.963	0	0	0
UGCUCA	0.9564	0.9771	1.0027	0	0	0	1.0027	0	0	0
AGGGUG	0.9657	0.9961	0.9741	0	0	0	0.9741	0	0	0
GUACGA	0.9853	0.9976	0.953	0	0	0	0.953	0	0	0
CCCUGU	0.957	0.9983	0.9801	0	0	0	0.9801	0	0	0
CAGGCU	0.9894	0.9836	0.9616	0	0	0	0.9616	0	0	0
UCGGGA	0.9852	0.9977	0.9514	0	0	0	0.9514	0	0	0
UCGACA	0.9788	0.9743	0.9811	0	0	0	0.9811	0	0	0
GGGCAA	0.971	0.9876	0.9755	0	0	0	0.9755	0	0	0
ACUAUG	0.9896	0.9661	0.9782	0	0	0	0.9782	0	0	0
GGCAGU	0.9832	1.001	0.9496	0	0	0	0.9496	0	0	0
CAGACG	0.9767	0.982	0.9749	0	0	0	0.9749	0	0	0
GUACCC	0.9823	0.9759	0.9753	0	0	0	0.9753	0	0	0
CUUCGC	0.9568	0.9761	1.0006	0	0	0	1.0006	0	0	0
CAGGGC	0.9602	0.9783	0.9943	0	0	0	0.9943	0	0	0
CACACG	0.9759	0.9572	0.9995	0	0	0	0.9995	0	0	0
AGCCAC	0.9753	0.9638	0.9934	0	0	0	0.9934	0	0	0
CUCUCG	0.9609	0.9845	0.9868	0	0	0	0.9868	0	0	0
GGCAAC	0.9885	0.9674	0.9762	0	0	0	0.9762	0	0	0
UUCGGU	0.9615	0.9952	0.9754	0	0	0	0.9754	0	0	0
GGUAAU	0.9857	0.9901	0.9562	0	0	0	0.9562	0	0	0
GGUGGC	0.9672	0.9953	0.9695	0	0	0	0.9695	0	0	0
UUACGA	0.9598	0.9876	0.9844	0	0	0	0.9844	0	0	0
GCUCGC	0.9759	0.9738	0.982	0	0	0	0.982	0	0	0
GCUCCU	0.9547	0.9833	0.9931	0	0	0	0.9931	0	0	0
AGGAAG	1.0032	0.9939	0.9329	0	0	0	0.9329	0	0	0
AAGCAC	0.9938	0.9607	0.9754	0	0	0	0.9754	0	0	0
CACGAC	0.9767	0.97	0.9824	0	0	0	0.9824	0	0	0
CCAGCU	0.9642	0.9777	0.9865	0	0	0	0.9865	0	0	0
GUUUCC	0.9465	0.9881	0.9934	0	0	0	0.9934	0	0	0
CAAUUU	0.9526	0.9701	1.0048	0	0	0	1.0048	0	0	0
AUAGCA	0.9832	0.9643	0.9786	0	0	0	0.9786	0	0	0
UCCCAA	0.9722	0.9671	0.9865	0	0	0	0.9865	0	0	0
ACCAAG	0.9908	0.9614	0.9735	0	0	0	0.9735	0	0	0
CUCCAA	0.9718	0.9633	0.9901	0	0	0	0.9901	0	0	0
CACUCC	0.9805	0.9588	0.9852	0	0	0	0.9852	0	0	0
CUUCCU	0.9583	0.9801	0.9861	0	0	0	0.9861	0	0	0
GCAAAG	0.9755	0.9855	0.9631	0	0	0	0.9631	0	0	0
GUGGCU	0.9683	0.9933	0.9622	0	0	0	0.9622	0	0	0
UUCAGG	0.9618	0.9742	0.9877	0	0	0	0.9877	0	0	0
UGGUAC	0.9736	0.9933	0.9564	0	0	0	0.9564	0	0	0
AGCGGG	0.9603	0.9958	0.9667	0	0	0	0.9667	0	0	0
CCACGC	0.9588	0.9605	1.0034	0	0	0	1.0034	0	0	0
UUGGAC	0.9723	0.9798	0.9703	0	0	0	0.9703	0	0	0
AUAGAA	0.9782	0.9877	0.955	0	0	0	0.955	0	0	0
UAGGAC	0.9709	0.9905	0.959	0	0	0	0.959	0	0	0
AAGGCU	0.9793	0.991	0.95	0	0	0	0.95	0	0	0
CAUUCC	0.9483	0.9746	0.9972	0	0	0	0.9972	0	0	0
CAAGCG	0.9684	0.9716	0.9793	0	0	0	0.9793	0	0	0
GCGCAA	0.976	0.9551	0.9881	0	0	0	0.9881	0	0	0
CGAACG	0.9862	0.9763	0.9565	0	0	0	0.9565	0	0	0
UAGAAA	1.0087	0.9767	0.9335	0	0	0	0.9335	0	0	0
AUGUUA	0.9495	0.9809	0.9879	0	0	0	0.9879	0	0	0
CCCAUU	0.9473	0.9804	0.9904	0	0	0	0.9904	0	0	0
GAGUGG	0.9774	0.985	0.9553	0	0	0	0.9553	0	0	0
AAGGUG	0.9704	0.9774	0.9688	0	0	0	0.9688	0	0	0
GGGUUU	0.9552	0.9918	0.9696	0	0	0	0.9696	0	0	0
GUCACC	0.9781	0.9567	0.9816	0	0	0	0.9816	0	0	0
ACUUCC	0.9596	0.9755	0.9813	0	0	0	0.9813	0	0	0
UAGGCU	0.9535	0.9974	0.9654	0	0	0	0.9654	0	0	0
AUCACC	0.9542	0.944	1.0178	0	0	0	1.0178	0	0	0
GGUGAG	0.98	0.9927	0.9425	0	0	0	0.9425	0	0	0
CAGAGG	0.987	0.9906	0.9373	0	0	0	0.9373	0	0	0
AGCUGG	0.9734	0.9869	0.9545	0	0	0	0.9545	0	0	0
CAAAAC	0.9843	0.9566	0.9736	0	0	0	0.9736	0	0	0
AGACCG	0.9864	0.972	0.9556	0	0	0	0.9556	0	0	0
CUCACG	0.9508	0.9694	0.9934	0	0	0	0.9934	0	0	0
GAGCUA	0.9749	0.9818	0.9567	0	0	0	0.9567	0	0	0
AUGUAA	0.9759	0.9705	0.9669	0	0	0	0.9669	0	0	0
UGCAGU	0.96	0.9872	0.9659	0	0	0	0.9659	0	0	0
CCACAC	0.9695	0.9466	0.9958	0	0	0	0.9958	0	0	0
GCAACG	0.9683	0.9694	0.9741	0	0	0	0.9741	0	0	0
CCUUUC	0.9427	0.964	1.005	0	0	0	1.005	0	0	0
ACGGCA	0.9595	0.9844	0.967	0	0	0	0.967	0	0	0
CGGCAA	0.9633	0.9795	0.9681	0	0	0	0.9681	0	0	0
AACAGA	0.9659	0.9656	0.9772	0	0	0	0.9772	0	0	0
CGGGUU	0.9364	1.0049	0.9661	0	0	0	0.9661	0	0	0
AUAGAG	0.9586	0.9881	0.9601	0	0	0	0.9601	0	0	0
GAGUCU	0.9869	0.9778	0.9419	0	0	0	0.9419	0	0	0
AGUGCU	0.9838	0.9727	0.949	0	0	0	0.949	0	0	0
UUCUUU	0.9275	0.9773	1.0006	0	0	0	1.0006	0	0	0
CGCUCC	0.9407	0.9651	0.9987	0	0	0	0.9987	0	0	0
GUGAAC	0.9934	0.9749	0.9359	0	0	0	0.9359	0	0	0
GUUGUG	0.9685	0.9833	0.9524	0	0	0	0.9524	0	0	0
GUGGAG	0.9665	0.9771	0.9602	0	0	0	0.9602	0	0	0
CCUCAC	0.9367	0.9565	1.0104	0	0	0	1.0104	0	0	0
CCGUGG	0.9644	0.9733	0.9657	0	0	0	0.9657	0	0	0
GCAAGG	0.9802	0.9719	0.9511	0	0	0	0.9511	0	0	0
CUCCCU	0.9557	0.9668	0.9804	0	0	0	0.9804	0	0	0
AAACAC	0.9732	0.9631	0.9664	0	0	0	0.9664	0	0	0
AUCCAG	0.9637	0.9659	0.9727	0	0	0	0.9727	0	0	0
CCCACA	0.9552	0.945	1.0021	0	0	0	1.0021	0	0	0
UCCCUC	0.9547	0.9671	0.98	0	0	0	0.98	0	0	0
GCCGGG	0.9549	0.9736	0.9725	0	0	0	0.9725	0	0	0
UGCAUC	0.9541	0.974	0.9727	0	0	0	0.9727	0	0	0
GCAUGG	0.9612	0.9748	0.9647	0	0	0	0.9647	0	0	0
AAGGCA	0.976	0.9693	0.9549	0	0	0	0.9549	0	0	0
CCGUGC	0.9549	0.9625	0.9827	0	0	0	0.9827	0	0	0
GCUUCU	0.9413	0.9806	0.9776	0	0	0	0.9776	0	0	0
GCUCUU	0.9442	0.9761	0.9786	0	0	0	0.9786	0	0	0
UUCAAG	0.9528	0.953	0.9929	0	0	0	0.9929	0	0	0
CGGCUC	0.9674	0.9717	0.9593	0	0	0	0.9593	0	0	0
AAAGGG	0.991	0.9613	0.9459	0	0	0	0.9459	0	0	0
CAUUGG	0.9398	0.9829	0.9749	0	0	0	0.9749	0	0	0
AAACCU	0.9719	0.9552	0.968	0	0	0	0.968	0	0	0
CGUGCU	0.9671	0.9734	0.9543	0	0	0	0.9543	0	0	0
ACCAGG	0.96	0.9629	0.9705	0	0	0	0.9705	0	0	0
CAUGGG	0.9526	0.9686	0.972	0	0	0	0.972	0	0	0
AGGGGG	0.9528	0.9895	0.9508	0	0	0	0.9508	0	0	0
AGGGAC	0.9608	0.9729	0.9591	0	0	0	0.9591	0	0	0
CUACCC	0.9498	0.9607	0.9823	0	0	0	0.9823	0	0	0
UAGACA	0.9722	0.964	0.9565	0	0	0	0.9565	0	0	0
CGGAGU	0.9751	0.9654	0.9521	0	0	0	0.9521	0	0	0
CGUCUG	0.9813	0.9655	0.9457	0	0	0	0.9457	0	0	0
UCGAGG	0.9624	0.9861	0.9428	0	0	0	0.9428	0	0	0
UCACCG	0.9519	0.9492	0.9899	0	0	0	0.9899	0	0	0
CCGCAA	0.9446	0.9508	0.9955	0	0	0	0.9955	0	0	0
AACGAC	0.986	0.957	0.9477	0	0	0	0.9477	0	0	0
CCUGUU	0.934	0.9911	0.9653	0	0	0	0.9653	0	0	0
UGGUUU	0.9377	0.997	0.9554	0	0	0	0.9554	0	0	0
CGGAGG	0.9812	0.9787	0.9301	0	0	0	0.9301	0	0	0
AGACCA	0.9673	0.9733	0.9493	0	0	0	0.9493	0	0	0
CCCAGU	0.955	0.9565	0.9779	0	0	0	0.9779	0	0	0
CAGGAG	0.981	0.9626	0.9455	0	0	0	0.9455	0	0	0
AACUCC	0.9609	0.9612	0.9669	0	0	0	0.9669	0	0	0
AACGUG	0.9776	0.9559	0.9546	0	0	0	0.9546	0	0	0
ACCCUU	0.9442	0.9664	0.9755	0	0	0	0.9755	0	0	0
AACUCG	0.9672	0.9693	0.9494	0	0	0	0.9494	0	0	0
[truncated: 2,098 more rows]

## Sheet: Pfalciparum_IESI1
P_falciparum	Replicate_1			Replicate_2
6-mer	250 nM	500 nM	1000 nM	250 nM	500 nM	1000 nM	Average_250nM	Average_500nM	Average_1000nM	Average_all
UGAUGA	3.3366	3.5584	2.4826	1.5658	1.6876	2.6118	2.4826	2.4512	2.623	2.237
AUGAUG	3.1675	3.4226	2.3862	1.3967	1.4932	2.2861	2.3862	2.2821	2.4579	2.05037
UGAUUU	3.0027	3.2263	2.3038	1.3881	1.5216	2.3645	2.3038	2.1954	2.37395	2.02456
UUGAUG	2.9526	3.1363	2.3166	1.5096	1.6218	2.379	2.3166	2.2311	2.37905	2.07286
AUGAUU	2.7529	3.0024	2.1924	1.2272	1.337	2.0458	2.1924	1.99005	2.1697	1.82702
UUGAUU	2.6871	2.9636	2.1773	1.3781	1.4818	2.2743	2.1773	2.0326	2.2227	1.9278
UGAUGU	2.498	2.7797	2.0957	1.3405	1.4251	2.1133	2.0957	1.91925	2.1024	1.83271
CUGAUU	2.5203	2.6635	1.9651	1.3552	1.4526	2.0592	1.9651	1.93775	2.05805	1.80465
CUGAUG	2.4729	2.5807	1.9732	1.4881	1.5844	2.1375	1.9732	1.9805	2.08255	1.87437
UGAUUC	2.4386	2.6062	1.9667	1.4002	1.4191	1.8987	1.9667	1.9194	2.01265	1.76946
UUUGAU	2.3866	2.6186	1.9545	1.3038	1.4119	2.0583	1.9545	1.8452	2.01525	1.76483
UGAUGG	2.4822	2.5606	1.8996	1.5241	1.6152	2.1705	1.8996	2.00315	2.0879	1.88341
GAUGAU	2.4284	2.5762	1.9025	1.3794	1.4775	2.0641	1.9025	1.9039	2.02685	1.79237
UGAUUA	2.213	2.5752	1.9447	1.0954	1.2255	1.9059	1.9447	1.6542	1.90035	1.62101
AAUGAU	2.2754	2.5032	1.8795	0	0	0	1.8795	1.1377	1.2516	0.711467
UGAUUG	2.381	2.4233	1.8495	1.449	1.5443	2.146	1.8495	1.915	1.9838	1.8146
UGAUGC	2.3135	2.4169	1.9066	1.4277	1.4516	1.9093	1.9066	1.8706	1.93425	1.75001
CAUGAU	2.2436	2.4176	1.851	0	0	0	1.851	1.1218	1.2088	0.696933
AUUGAU	2.2086	2.4002	1.849	1.1433	1.2291	1.7805	1.849	1.67595	1.81465	1.58208
GUGAUG	2.0186	2.1699	1.7184	1.4633	1.4569	2	1.7184	1.74095	1.8134	1.69883
CUUGAU	2.0128	2.1466	1.7448	1.3372	1.4124	1.8873	1.7448	1.675	1.7795	1.63937
UAUGAU	1.9494	2.1726	1.6101	0	0	0	1.6101	0.9747	1.0863	0.61185
CCUGAU	1.9901	2.0779	1.6603	1.3318	1.388	1.7819	1.6603	1.66095	1.73295	1.59265
ACUGAU	1.8911	2.0571	1.6526	0	0	0	1.6526	0.94555	1.02855	0.60445
UGAUAG	1.8737	2.0767	1.6488	1.2257	1.3289	1.783	1.6488	1.5497	1.7028	1.53982
AUGAUA	1.8365	2.0819	1.6311	0	0	0	1.6311	0.91825	1.04095	0.598383
GAUGAA	1.8797	1.9997	1.591	0	0	0	1.591	0.93985	0.99985	0.58845
GUGAUU	1.8276	2.0079	1.6082	1.3185	1.3583	1.8381	1.6082	1.57305	1.6831	1.56321
UCUGAU	1.878	1.9817	1.5789	0	0	0	1.5789	0.939	0.99085	0.584792
GAUUUG	1.8829	1.9404	1.5129	1.4351	1.4691	1.8336	1.5129	1.659	1.70475	1.60241
UUGAUA	1.7194	1.9235	1.5976	0	0	0	1.5976	0.8597	0.96175	0.569842
GAUUUU	1.78	1.9192	1.5289	0	0	0	1.5289	0.89	0.9596	0.563083
GAUGGC	1.8475	1.8236	1.4811	0	0	0	1.4811	0.92375	0.9118	0.552775
GAUGAC	1.7975	1.796	1.5108	0	0	0	1.5108	0.89875	0.898	0.551258
UGAUAA	1.6653	1.8928	1.5362	0	0	0	1.5362	0.83265	0.9464	0.552542
GUUGAU	1.7134	1.8088	1.5053	1.2985	1.3754	1.7487	1.5053	1.50595	1.5921	1.50432
GCUGAU	1.7726	1.7585	1.4708	0	0	0	1.4708	0.8863	0.87925	0.539392
GAUUUC	1.709	1.7351	1.5243	0	0	0	1.5243	0.8545	0.86755	0.541058
CGAUGA	1.6608	1.6978	1.4447	0	0	0	1.4447	0.8304	0.8489	0.520667
GAUUGC	1.7004	1.6786	1.4229	0	0	0	1.4229	0.8502	0.8393	0.518733
UGAUAC	1.5871	1.6829	1.4696	0	0	0	1.4696	0.79355	0.84145	0.517433
GAUUGA	1.6102	1.6879	1.4268	0	0	0	1.4268	0.8051	0.84395	0.512642
AGUGAU	1.553	1.7266	1.4432	0	0	0	1.4432	0.7765	0.8633	0.513833
GAUGAG	1.6091	1.6805	1.431	0	0	0	1.431	0.80455	0.84025	0.512633
CUGAUA	1.5733	1.7124	1.4283	0	0	0	1.4283	0.78665	0.8562	0.511858
UGUGAU	1.555	1.7275	1.3931	0	0	0	1.3931	0.7775	0.86375	0.505725
UGAUAU	1.4978	1.6944	1.3814	0	0	0	1.3814	0.7489	0.8472	0.49625
CGUGAU	1.5585	1.6203	1.3923	0	0	0	1.3923	0.77925	0.81015	0.49695
GAUGUG	1.5348	1.6491	1.3578	0	0	0	1.3578	0.7674	0.82455	0.491625
UUUUGA	1.5296	1.5926	1.3728	0	0	0	1.3728	0.7648	0.7963	0.488983
CGAGAA	1.5171	1.5308	1.4326	0	0	0	1.4326	0.75855	0.7654	0.492758
GAUUCU	1.5251	1.5964	1.3341	0	0	0	1.3341	0.76255	0.7982	0.482475
GAUGCC	1.5668	1.4554	1.3921	0	0	0	1.3921	0.7834	0.7277	0.483867
GAGAAA	1.4111	1.5463	1.4512	0	0	0	1.4512	0.70555	0.77315	0.488317
CACCCG	1.6668	1.3265	1.4144	2.0834	2.0336	1.9516	1.4144	1.8751	1.68005	1.83969
CCCGAG	1.6574	1.2945	1.4538	2.1639	2.1971	2.0462	1.4538	1.91065	1.7458	1.91958
AAAUGA	1.4226	1.6013	1.3803	0	0	0	1.3803	0.7113	0.80065	0.482042
CCGAGA	1.5918	1.4046	1.405	1.7959	1.861	1.7853	1.405	1.69385	1.6328	1.69564
ACCCGA	1.629	1.3611	1.3974	1.8539	1.9348	1.8256	1.3974	1.74145	1.64795	1.73352
AGAUGA	1.493	1.5537	1.3387	0	0	0	1.3387	0.7465	0.77685	0.477008
AUUUGA	1.4512	1.5927	1.338	0	0	0	1.338	0.7256	0.79635	0.476658
GAAUGA	1.4724	1.5453	1.3605	0	0	0	1.3605	0.7362	0.77265	0.478225
ACCUGA	1.51	1.4823	1.3722	0	0	0	1.3722	0.755	0.74115	0.478058
GAUUCC	1.5127	1.4683	1.3788	0	0	0	1.3788	0.75635	0.73415	0.478217
GAUUCA	1.4438	1.5598	1.3495	0	0	0	1.3495	0.7219	0.7799	0.475217
GAUGUU	1.4722	1.53	1.3074	0	0	0	1.3074	0.7361	0.765	0.468083
GAGAAU	1.4349	1.4987	1.3712	0	0	0	1.3712	0.71745	0.74935	0.473
CCCGGG	1.5644	1.2956	1.4183	2.069	2.0628	1.998	1.4183	1.8167	1.6792	1.84067
GAUGGG	1.4663	1.4563	1.3398	0	0	0	1.3398	0.73315	0.72815	0.46685
GACACC	1.5555	1.3176	1.3523	0	0	0	1.3523	0.77775	0.6588	0.464808
GAUAGC	1.4401	1.4843	1.2979	0	0	0	1.2979	0.72005	0.74215	0.460017
ACUUGA	1.4151	1.4634	1.3362	0	0	0	1.3362	0.70755	0.7317	0.462575
GCCCGA	1.5159	1.3412	1.3551	1.9786	1.9389	1.889	1.3551	1.74725	1.64005	1.75815
CCCUGA	1.4438	1.4078	1.3517	0	0	0	1.3517	0.7219	0.7039	0.462917
AAUUGA	1.3706	1.5183	1.3103	0	0	0	1.3103	0.6853	0.75915	0.459125
AGAGAA	1.3377	1.4848	1.3695	0	0	0	1.3695	0.66885	0.7424	0.463458
GAUUCG	1.4336	1.4412	1.311	0	0	0	1.311	0.7168	0.7206	0.458067
GCCUGA	1.447	1.3977	1.3237	0	0	0	1.3237	0.7235	0.69885	0.457675
CCUUGA	1.4617	1.3735	1.3196	0	0	0	1.3196	0.73085	0.68675	0.4562
ACACCC	1.5345	1.2836	1.3326	0	0	0	1.3326	0.76725	0.6418	0.456942
GAUGCG	1.413	1.4187	1.3129	0	0	0	1.3129	0.7065	0.70935	0.454792
GAAAAA	1.2902	1.4766	1.3662	0	0	0	1.3662	0.6451	0.7383	0.458267
GAUUAC	1.3562	1.4757	1.2891	0	0	0	1.2891	0.6781	0.73785	0.450842
AAAAAA	1.2489	1.5092	1.362	0	0	0	1.362	0.62445	0.7546	0.456842
CCCGAA	1.4375	1.3254	1.3531	0	0	0	1.3531	0.71875	0.6627	0.455758
GCAUGA	1.4087	1.4293	1.2716	0	0	0	1.2716	0.70435	0.71465	0.448433
GAUGCA	1.3917	1.4245	1.2924	0	0	0	1.2924	0.69585	0.71225	0.450083
AGAAAA	1.2732	1.4802	1.3496	0	0	0	1.3496	0.6366	0.7401	0.454383
CCAUGA	1.4009	1.4255	1.2707	0	0	0	1.2707	0.70045	0.71275	0.447317
GCACCC	1.5002	1.2622	1.3319	0	0	0	1.3319	0.7501	0.6311	0.452183
CCUGAG	1.4662	1.2631	1.3404	1.7541	1.8166	1.7639	1.3404	1.61015	1.53985	1.6375
UGAGAA	1.3303	1.3946	1.3395	0	0	0	1.3395	0.66515	0.6973	0.450325
GAUGUC	1.3679	1.3918	1.2878	0	0	0	1.2878	0.68395	0.6959	0.444608
AUGAUC	1.3813	1.4214	1.2398	0	0	0	1.2398	0.69065	0.7107	0.440192
GCUUGA	1.36	1.3956	1.2812	0	0	0	1.2812	0.68	0.6978	0.443167
GCGAUG	1.3666	1.3908	1.2758	0	0	0	1.2758	0.6833	0.6954	0.442417
CCGAUG	1.381	1.354	1.2929	0	0	0	1.2929	0.6905	0.677	0.4434
GUGAUA	1.3118	1.4349	1.2776	0	0	0	1.2776	0.6559	0.71745	0.441825
CUUUGA	1.3524	1.4126	1.2576	0	0	0	1.2576	0.6762	0.7063	0.440017
UGAUCC	1.3822	1.3797	1.2563	0	0	0	1.2563	0.6911	0.68985	0.439542
UGACAC	1.3948	1.3173	1.3024	0	0	0	1.3024	0.6974	0.65865	0.443075
CCCAGA	1.394	1.3215	1.2973	0	0	0	1.2973	0.697	0.66075	0.442508
GAUUUA	1.3326	1.4558	1.2241	0	0	0	1.2241	0.6663	0.7279	0.436383
ACCCGG	1.4415	1.2496	1.3181	1.8046	1.8373	1.7647	1.3181	1.62305	1.54345	1.64853
GGUGAU	1.33	1.395	1.2831	0	0	0	1.2831	0.665	0.6975	0.440933
CACCUG	1.4093	1.3034	1.2942	0	0	0	1.2942	0.70465	0.6517	0.441758
CACCCA	1.4223	1.2634	1.3099	0	0	0	1.3099	0.71115	0.6317	0.442125
CUGAGA	1.3615	1.3034	1.3253	0	0	0	1.3253	0.68075	0.6517	0.442958
GAUUGG	1.3695	1.3662	1.2528	0	0	0	1.2528	0.68475	0.6831	0.436775
CGCCCG	1.4323	1.2243	1.3302	1.9496	1.8825	1.8231	1.3302	1.69095	1.5534	1.70496
CAAUGA	1.3353	1.4137	1.2351	0	0	0	1.2351	0.66765	0.70685	0.434933
GAGAAG	1.3343	1.3584	1.2878	0	0	0	1.2878	0.66715	0.6792	0.439025
UGAUCU	1.359	1.3711	1.2266	0	0	0	1.2266	0.6795	0.68555	0.431942
GAUGCU	1.3424	1.3698	1.2397	0	0	0	1.2397	0.6712	0.6849	0.432633
GAUUAG	1.2962	1.4004	1.2484	0	0	0	1.2484	0.6481	0.7002	0.432783
CGAUUU	1.3459	1.3783	1.2195	0	0	0	1.2195	0.67295	0.68915	0.430267
GAGAUG	1.3617	1.3333	1.2418	0	0	0	1.2418	0.68085	0.66665	0.43155
CUCGAG	1.3815	1.2787	1.2725	0	0	0	1.2725	0.69075	0.63935	0.433767
AACCCG	1.3817	1.2547	1.2936	0	0	0	1.2936	0.69085	0.62735	0.4353
CAUUGA	1.3256	1.3745	1.2231	0	0	0	1.2231	0.6628	0.68725	0.428858
ACGAUG	1.3336	1.3766	1.2103	0	0	0	1.2103	0.6668	0.6883	0.427567
CCCGAU	1.3732	1.2682	1.2736	0	0	0	1.2736	0.6866	0.6341	0.432383
CCCCGA	1.3684	1.2263	1.3146	0	0	0	1.3146	0.6842	0.61315	0.435325
CCAGAG	1.3206	1.2963	1.2881	0	0	0	1.2881	0.6603	0.64815	0.432758
GAUACC	1.3441	1.3143	1.2445	0	0	0	1.2445	0.67205	0.65715	0.42895
ACCCAG	1.3497	1.2632	1.278	0	0	0	1.278	0.67485	0.6316	0.430742
UUGAUC	1.3206	1.3502	1.2177	0	0	0	1.2177	0.6603	0.6751	0.425517
AAGAGA	1.2335	1.3734	1.2792	0	0	0	1.2792	0.61675	0.6867	0.430442
GCCCGG	1.3766	1.196	1.3117	1.9042	1.8697	1.8201	1.3117	1.6404	1.53285	1.67982
CAGAGA	1.279	1.3072	1.2962	0	0	0	1.2962	0.6395	0.6536	0.43155
CCGGGA	1.3997	1.2077	1.2728	1.7197	1.7244	1.7518	1.2728	1.5597	1.46605	1.58241
CCAGAA	1.2904	1.3153	1.2743	0	0	0	1.2743	0.6452	0.65765	0.429525
CCGAUU	1.3447	1.3019	1.231	0	0	0	1.231	0.67235	0.65095	0.425717
UCCGAG	1.3452	1.2522	1.2801	0	0	0	1.2801	0.6726	0.6261	0.4298
CACUGA	1.287	1.3454	1.2412	0	0	0	1.2412	0.6435	0.6727	0.426233
GGCACC	1.3819	1.1981	1.2894	0	0	0	1.2894	0.69095	0.59905	0.4299
UCUUGA	1.2992	1.3225	1.247	0	0	0	1.247	0.6496	0.66125	0.426308
AAAAAG	1.2024	1.3735	1.2912	0	0	0	1.2912	0.6012	0.68675	0.429858
GAUGGA	1.2924	1.3414	1.23	0	0	0	1.23	0.6462	0.6707	0.424483
CCCCGG	1.3181	1.2099	1.3219	0	0	0	1.3219	0.65905	0.60495	0.430983
GAUUAA	1.2364	1.4158	1.1955	0	0	0	1.1955	0.6182	0.7079	0.420267
AGACAC	1.3197	1.2701	1.2574	0	0	0	1.2574	0.65985	0.63505	0.425383
AUUUUG	1.3013	1.3336	1.2123	0	0	0	1.2123	0.65065	0.6668	0.421625
UUCUGA	1.3015	1.3283	1.2147	0	0	0	1.2147	0.65075	0.66415	0.4216
AACUGA	1.2441	1.3668	1.2324	0	0	0	1.2324	0.62205	0.6834	0.422975
GAUGUA	1.2462	1.3919	1.2042	0	0	0	1.2042	0.6231	0.69595	0.420542
ACGAGA	1.2762	1.3163	1.2475	0	0	0	1.2475	0.6381	0.65815	0.423958
GAGAGA	1.2646	1.2901	1.2833	0	0	0	1.2833	0.6323	0.64505	0.426775
GAGAAC	1.2449	1.3147	1.2711	0	0	0	1.2711	0.62245	0.65735	0.42515
ACCGAG	1.3421	1.2355	1.253	0	0	0	1.253	0.67105	0.61775	0.423633
CCGAGG	1.3551	1.1909	1.2702	0	0	0	1.2702	0.67755	0.59545	0.423867
ACAUGA	1.2452	1.3654	1.2047	0	0	0	1.2047	0.6226	0.6827	0.418333
CGAGAU	1.3183	1.282	1.214	0	0	0	1.214	0.65915	0.641	0.419025
GUUUGA	1.2658	1.3152	1.2327	0	0	0	1.2327	0.6329	0.6576	0.420533
AGAAUU	1.2288	1.3291	1.251	0	0	0	1.251	0.6144	0.66455	0.421658
CCCGGA	1.3286	1.2001	1.2796	0	0	0	1.2796	0.6643	0.60005	0.423992
AAAAGA	1.1858	1.3632	1.2591	0	0	0	1.2591	0.5929	0.6816	0.422267
AGAAAG	1.1936	1.3224	1.2769	0	0	0	1.2769	0.5968	0.6612	0.422483
GAAGAA	1.2121	1.3311	1.2462	0	0	0	1.2462	0.60605	0.66555	0.419633
GAAAUG	1.2289	1.3119	1.2482	0	0	0	1.2482	0.61445	0.65595	0.419767
GAAAAG	1.1887	1.3209	1.2777	0	0	0	1.2777	0.59435	0.66045	0.422083
AAGAAA	1.1606	1.3703	1.2506	0	0	0	1.2506	0.5803	0.68515	0.419342
CGGGAA	1.2758	1.2371	1.2665	0	0	0	1.2665	0.6379	0.61855	0.420492
AAAAUG	1.1863	1.358	1.2349	0	0	0	1.2349	0.59315	0.679	0.417842
CGAGAG	1.2892	1.22	1.2676	0	0	0	1.2676	0.6446	0.61	0.420367
CCGAAA	1.2372	1.2712	1.2668	0	0	0	1.2668	0.6186	0.6356	0.420167
AUGAGA	1.2275	1.3148	1.2276	0	0	0	1.2276	0.61375	0.6574	0.416458
AAGAUG	1.2504	1.3179	1.2015	0	0	0	1.2015	0.6252	0.65895	0.414275
AGAAGA	1.2191	1.319	1.2313	0	0	0	1.2313	0.60955	0.6595	0.416725
GAAAGA	1.1867	1.3135	1.2628	0	0	0	1.2628	0.59335	0.65675	0.418817
CUGAUC	1.2918	1.2701	1.2005	0	0	0	1.2005	0.6459	0.63505	0.413575
CCAAGA	1.2376	1.2898	1.2339	0	0	0	1.2339	0.6188	0.6449	0.416267
GAAAAC	1.1959	1.3245	1.2367	0	0	0	1.2367	0.59795	0.66225	0.41615
GAUAUG	1.2573	1.31	1.1888	0	0	0	1.1888	0.62865	0.655	0.412075
GGAAAA	1.1765	1.32	1.2534	0	0	0	1.2534	0.58825	0.66	0.416942
CGAUUG	1.2766	1.2693	1.203	0	0	0	1.203	0.6383	0.63465	0.412658
GAGUGA	1.2482	1.3024	1.1965	0	0	0	1.1965	0.6241	0.6512	0.411967
GAAUUC	1.253	1.2632	1.2279	0	0	0	1.2279	0.6265	0.6316	0.414333
CCCAGG	1.2659	1.2064	1.2686	0	0	0	1.2686	0.63295	0.6032	0.417458
AGCCCG	1.3042	1.1893	1.2417	0	0	0	1.2417	0.6521	0.59465	0.414742
AUCUGA	1.2422	1.298	1.1946	0	0	0	1.1946	0.6211	0.649	0.410783
AGAAUG	1.2247	1.3073	1.2014	0	0	0	1.2014	0.61235	0.65365	0.411233
CCGAGU	1.3173	1.1811	1.2304	0	0	0	1.2304	0.65865	0.59055	0.413267
GCGAGA	1.2332	1.2564	1.2382	0	0	0	1.2382	0.6166	0.6282	0.413833
CCACCC	1.2986	1.1767	1.2508	0	0	0	1.2508	0.6493	0.58835	0.414742
CAGAAA	1.1663	1.3052	1.2521	0	0	0	1.2521	0.58315	0.6526	0.414642
CCGGGG	1.3005	1.1384	1.2837	0	0	0	1.2837	0.65025	0.5692	0.417192
CCCCCC	1.2818	1.1649	1.271	0	0	0	1.271	0.6409	0.58245	0.415725
GAAACC	1.2348	1.2572	1.2221	0	0	0	1.2221	0.6174	0.6286	0.41135
AUGAAA	1.1758	1.3476	1.1904	0	0	0	1.1904	0.5879	0.6738	0.408683
GUAUGA	1.2305	1.3239	1.1588	0	0	0	1.1588	0.61525	0.66195	0.406
GACUGA	1.2376	1.2764	1.1985	0	0	0	1.1985	0.6188	0.6382	0.40925
CUCUGA	1.2587	1.2497	1.2007	0	0	0	1.2007	0.62935	0.62485	0.40915
UCGAGA	1.2601	1.2293	1.2185	0	0	0	1.2185	0.63005	0.61465	0.410533
AAAGAA	1.1445	1.3253	1.2377	0	0	0	1.2377	0.57225	0.66265	0.4121
CAUCCG	1.314	1.197	1.1952	0	0	0	1.1952	0.657	0.5985	0.40845
ACCCCG	1.2926	1.1596	1.2522	0	0	0	1.2522	0.6463	0.5798	0.41305
AUGGCA	1.2764	1.263	1.1645	0	0	0	1.1645	0.6382	0.6315	0.4057
GGAGAA	1.2013	1.2772	1.2236	0	0	0	1.2236	0.60065	0.6386	0.410475
CACCCC	1.3042	1.1607	1.2365	0	0	0	1.2365	0.6521	0.58035	0.411492
CCGAGC	1.2936	1.1623	1.2441	0	0	0	1.2441	0.6468	0.58115	0.412008
GGGAAA	1.194	1.2473	1.2572	0	0	0	1.2572	0.597	0.62365	0.412975
UUGACA	1.2375	1.2493	1.207	0	0	0	1.207	0.61875	0.62465	0.4084
AAAACC	1.1946	1.2728	1.2252	0	0	0	1.2252	0.5973	0.6364	0.409817
UCAUGA	1.2252	1.2943	1.1724	0	0	0	1.1724	0.6126	0.64715	0.405358
AGAGAG	1.1943	1.2542	1.2421	0	0	0	1.2421	0.59715	0.6271	0.411058
AUGACA	1.2583	1.2703	1.1599	0	0	0	1.1599	0.62915	0.63515	0.404033
CUUGAC	1.2763	1.1931	1.2189	0	0	0	1.2189	0.63815	0.59655	0.408933
CGAAAA	1.1697	1.2831	1.2344	0	0	0	1.2344	0.58485	0.64155	0.410133
CGAUUC	1.2459	1.2461	1.195	0	0	0	1.195	0.62295	0.62305	0.406833
AUUCCA	1.2358	1.2285	1.2226	0	0	0	1.2226	0.6179	0.61425	0.409125
CCUGGG	1.2823	1.1614	1.2424	0	0	0	1.2424	0.64115	0.5807	0.410708
GAUAGG	1.192	1.29	1.2027	0	0	0	1.2027	0.596	0.645	0.407283
CAGAUG	1.2469	1.2461	1.1915	0	0	0	1.1915	0.62345	0.62305	0.406333
ACCCGC	1.2877	1.1703	1.2261	0	0	0	1.2261	0.64385	0.58515	0.409183
UGAAAA	1.16	1.3014	1.2216	0	0	0	1.2216	0.58	0.6507	0.408717
GAUAGA	1.2079	1.2986	1.1751	0	0	0	1.1751	0.60395	0.6493	0.404725
CCCAAG	1.2396	1.2157	1.2259	0	0	0	1.2259	0.6198	0.60785	0.408925
UGCCCG	1.3169	1.1646	1.1973	0	0	0	1.1973	0.65845	0.5823	0.406342
CCGUGA	1.2551	1.2236	1.1956	0	0	0	1.1956	0.62755	0.6118	0.405825
UCACCC	1.2928	1.1635	1.2138	0	0	0	1.2138	0.6464	0.58175	0.406992
UGACCC	1.286	1.1783	1.2049	0	0	0	1.2049	0.643	0.58915	0.406175
GACCCC	1.2781	1.157	1.2336	0	0	0	1.2336	0.63905	0.5785	0.408525
CGAUGC	1.2585	1.2184	1.1848	0	0	0	1.1848	0.62925	0.6092	0.403875
GACGCC	1.2898	1.1548	1.217	0	0	0	1.217	0.6449	0.5774	0.40655
AGCACC	1.2708	1.1705	1.219	0	0	0	1.219	0.6354	0.58525	0.406608
AGUUGA	1.2035	1.2621	1.1917	0	0	0	1.1917	0.60175	0.63105	0.404083
GACCCG	1.264	1.161	1.2322	0	0	0	1.2322	0.632	0.5805	0.40745
GAGACA	1.2153	1.238	1.2037	0	0	0	1.2037	0.60765	0.619	0.405058
UACCCG	1.3009	1.159	1.1961	0	0	0	1.1961	0.65045	0.5795	0.404342
UGGCAC	1.273	1.1691	1.2126	0	0	0	1.2126	0.6365	0.58455	0.405608
GGGAAU	1.2256	1.2199	1.2048	0	0	0	1.2048	0.6128	0.60995	0.404592
CCCGGC	1.2691	1.1423	1.236	0	0	0	1.236	0.63455	0.57115	0.40695
UCGAUG	1.2492	1.242	1.1561	0	0	0	1.1561	0.6246	0.621	0.400283
CCCGAC	1.3063	1.1486	1.1916	0	0	0	1.1916	0.65315	0.5743	0.403175
GGAUGA	1.2306	1.2479	1.1675	0	0	0	1.1675	0.6153	0.62395	0.401125
UGCUGA	1.239	1.2336	1.1717	0	0	0	1.1717	0.6195	0.6168	0.401333
AUCCGA	1.2501	1.2034	1.1906	0	0	0	1.1906	0.62505	0.6017	0.402892
AGAAAC	1.1604	1.2706	1.2123	0	0	0	1.2123	0.5802	0.6353	0.404633
GAUAAA	1.1422	1.3347	1.1648	0	0	0	1.1648	0.5711	0.66735	0.400542
CGAUGG	1.2391	1.2342	1.1667	0	0	0	1.1667	0.61955	0.6171	0.400558
GCCCAG	1.233	1.1865	1.2127	0	0	0	1.2127	0.6165	0.59325	0.403742
AUGGCG	1.2539	1.2292	1.1484	0	0	0	1.1484	0.62695	0.6146	0.398325
AGACCC	1.2343	1.1816	1.2155	0	0	0	1.2155	0.61715	0.5908	0.403908
CACGAG	1.2063	1.2035	1.2178	0	0	0	1.2178	0.60315	0.60175	0.403783
AAAAAC	1.1271	1.3021	1.1973	0	0	0	1.1973	0.56355	0.65105	0.401983
UGAUCA	1.2013	1.2585	1.1662	0	0	0	1.1662	0.60065	0.62925	0.39935
AACACC	1.2401	1.1981	1.1877	0	0	0	1.1877	0.62005	0.59905	0.401133
GAGACC	1.2334	1.1924	1.1978	0	0	0	1.1978	0.6167	0.5962	0.401783
AGCUGA	1.2047	1.2375	1.1795	0	0	0	1.1795	0.60235	0.61875	0.4001
CGCUGA	1.2435	1.2182	1.158	0	0	0	1.158	0.62175	0.6091	0.398142
GCGAUU	1.2277	1.2383	1.1493	0	0	0	1.1493	0.61385	0.61915	0.39705
CCCCAG	1.2401	1.1669	1.208	0	0	0	1.208	0.62005	0.58345	0.401917
CGAGAC	1.234	1.1951	1.1845	0	0	0	1.1845	0.617	0.59755	0.399842
GAGAUU	1.232	1.2411	1.1394	0	0	0	1.1394	0.616	0.62055	0.395992
CACUCG	1.2478	1.1509	1.2123	0	0	0	1.2123	0.6239	0.57545	0.401942
AAACCC	1.2384	1.1942	1.1781	0	0	0	1.1781	0.6192	0.5971	0.399067
CCCGCG	1.2619	1.1262	1.2217	0	0	0	1.2217	0.63095	0.5631	0.402625
CCGCGA	1.2267	1.1738	1.2076	0	0	0	1.2076	0.61335	0.5869	0.401308
AAAGAG	1.1496	1.2662	1.192	0	0	0	1.192	0.5748	0.6331	0.399983
GAAAAU	1.1248	1.2871	1.1879	0	0	0	1.1879	0.5624	0.64355	0.398975
AUGACC	1.2324	1.1975	1.1685	0	0	0	1.1685	0.6162	0.59875	0.397242
GGCCCG	1.2585	1.1118	1.2277	0	0	0	1.2277	0.62925	0.5559	0.402142
GAUUAU	1.181	1.3027	1.1115	0	0	0	1.1115	0.5905	0.65135	0.392225
UUUUUG	1.1788	1.2569	1.1578	0	0	0	1.1578	0.5894	0.62845	0.395942
CAAAAA	1.1188	1.2808	1.1907	0	0	0	1.1907	0.5594	0.6404	0.398417
UUGAGA	1.1941	1.2162	1.18	0	0	0	1.18	0.59705	0.6081	0.397525
GCCGAG	1.2274	1.1581	1.2037	0	0	0	1.2037	0.6137	0.57905	0.399408
AGAGAU	1.1829	1.2403	1.1646	0	0	0	1.1646	0.59145	0.62015	0.396033
GAGGAA	1.1631	1.2114	1.2094	0	0	0	1.2094	0.58155	0.6057	0.399442
AGAUUU	1.168	1.2607	1.155	0	0	0	1.155	0.584	0.63035	0.394892
AGAUUC	1.1935	1.2185	1.1716	0	0	0	1.1716	0.59675	0.60925	0.396267
CACCGA	1.2131	1.1862	1.1829	0	0	0	1.1829	0.60655	0.5931	0.397092
GAAUUG	1.1914	1.2051	1.1855	0	0	0	1.1855	0.5957	0.60255	0.397292
GAAAGC	1.1537	1.2215	1.2063	0	0	0	1.2063	0.57685	0.61075	0.398983
ACCCUG	1.2383	1.1668	1.1752	0	0	0	1.1752	0.61915	0.5834	0.396292
CAAGAA	1.1077	1.2721	1.2003	0	0	0	1.2003	0.55385	0.63605	0.398367
ACUCGA	1.2149	1.1984	1.1667	0	0	0	1.1667	0.60745	0.5992	0.395558
CCGAAG	1.2077	1.1861	1.1832	0	0	0	1.1832	0.60385	0.59305	0.396683
CACCCU	1.2591	1.1339	1.1791	0	0	0	1.1791	0.62955	0.56695	0.395933
CCCCCG	1.2434	1.1135	1.2145	0	0	0	1.2145	0.6217	0.55675	0.398825
GGGGGG	1.1847	1.1275	1.2591	0	0	0	1.2591	0.59235	0.56375	0.402533
GAUAAC	1.1649	1.2565	1.1453	0	0	0	1.1453	0.58245	0.62825	0.392667
AUGGCC	1.2241	1.2009	1.1415	0	0	0	1.1415	0.61205	0.60045	0.392333
ACGCCC	1.2744	1.1215	1.1705	0	0	0	1.1705	0.6372	0.56075	0.394742
CUAUGA	1.2059	1.2602	1.0997	0	0	0	1.0997	0.60295	0.6301	0.388792
CGCGAG	1.1727	1.1855	1.2052	0	0	0	1.2052	0.58635	0.59275	0.397383
CUUGAG	1.2008	1.1824	1.1769	0	0	0	1.1769	0.6004	0.5912	0.39475
AGAACC	1.1922	1.1942	1.1727	0	0	0	1.1727	0.5961	0.5971	0.394317
CCGGAA	1.2042	1.1493	1.2034	0	0	0	1.2034	0.6021	0.57465	0.396692
GCCCCG	1.2236	1.133	1.1998	0	0	0	1.1998	0.6118	0.5665	0.39635
ACCCGU	1.2407	1.1221	1.1923	0	0	0	1.1923	0.62035	0.56105	0.395617
AUUGCG	1.2092	1.2291	1.1164	0	0	0	1.1164	0.6046	0.61455	0.389258
CCAAAA	1.1388	1.2369	1.1777	0	0	0	1.1777	0.5694	0.61845	0.394258
GGUUGA	1.2069	1.196	1.1499	0	0	0	1.1499	0.60345	0.598	0.391892
GCGCCC	1.2483	1.1052	1.1988	0	0	0	1.1988	0.62415	0.5526	0.395925
AGAGAC	1.1757	1.2081	1.1657	0	0	0	1.1657	0.58785	0.60405	0.392933
AAAAGG	1.1082	1.2423	1.1982	0	0	0	1.1982	0.5541	0.62115	0.395575
AGAAAU	1.0922	1.2948	1.1613	0	0	0	1.1613	0.5461	0.6474	0.392467
AUGUGA	1.1499	1.2578	1.139	0	0	0	1.139	0.57495	0.6289	0.390475
CAAAGA	1.1277	1.2146	1.204	0	0	0	1.204	0.56385	0.6073	0.395858
ACCCAA	1.2028	1.1719	1.1699	0	0	0	1.1699	0.6014	0.58595	0.392875
GCAGAA	1.1391	1.2057	1.199	0	0	0	1.199	0.56955	0.60285	0.395233
UCCUGA	1.2089	1.1787	1.1537	0	0	0	1.1537	0.60445	0.58935	0.39125
CACACC	1.2619	1.1248	1.1542	0	0	0	1.1542	0.63095	0.5624	0.391258
CCCGGU	1.2162	1.1159	1.208	0	0	0	1.208	0.6081	0.55795	0.395675
GAUGGU	1.1791	1.2254	1.1347	0	0	0	1.1347	0.58955	0.6127	0.389492
AAAUUG	1.1272	1.2608	1.1501	0	0	0	1.1501	0.5636	0.6304	0.390683
GAAGAG	1.1734	1.2024	1.1612	0	0	0	1.1612	0.5867	0.6012	0.391517
AAGAAG	1.115	1.2403	1.1802	0	0	0	1.1802	0.5575	0.62015	0.392975
GCCCGC	1.2418	1.0947	1.1988	0	0	0	1.1988	0.6209	0.54735	0.394508
CGAAGA	1.1613	1.1997	1.1737	0	0	0	1.1737	0.58065	0.59985	0.392367
GACACU	1.2032	1.1919	1.1364	0	0	0	1.1364	0.6016	0.59595	0.388992
CGAGGA	1.2061	1.1611	1.1639	0	0	0	1.1639	0.60305	0.58055	0.39125
UGAGAG	1.1776	1.1634	1.1896	0	0	0	1.1896	0.5888	0.5817	0.39335
AAAGAC	1.1238	1.2285	1.1781	0	0	0	1.1781	0.5619	0.61425	0.392375
AAGUGA	1.1163	1.2555	1.1585	0	0	0	1.1585	0.55815	0.62775	0.390733
CCUGAA	1.1729	1.1746	1.1827	0	0	0	1.1827	0.58645	0.5873	0.392742
AAAAAU	1.0718	1.2939	1.1639	0	0	0	1.1639	0.5359	0.64695	0.391125
AGGGAA	1.1336	1.208	1.1879	0	0	0	1.1879	0.5668	0.604	0.393117
UGAGAU	1.1646	1.2041	1.1599	0	0	0	1.1599	0.5823	0.60205	0.390708
CAGUGA	1.1713	1.1951	1.1607	0	0	0	1.1607	0.58565	0.59755	0.39065
GGGAAG	1.1733	1.1708	1.1795	0	0	0	1.1795	0.58665	0.5854	0.391925
CCUAGA	1.1978	1.1523	1.17	0	0	0	1.17	0.5989	0.57615	0.390842
GGGGAA	1.1538	1.1482	1.2181	0	0	0	1.2181	0.5769	0.5741	0.39485
UGCACC	1.2387	1.1495	1.1302	0	0	0	1.1302	0.61935	0.57475	0.387383
GAGAGU	1.1852	1.1563	1.1755	0	0	0	1.1755	0.5926	0.57815	0.391042
GACAUC	1.2053	1.1588	1.1524	0	0	0	1.1524	0.60265	0.5794	0.389075
ACACCU	1.2332	1.1581	1.1239	0	0	0	1.1239	0.6166	0.57905	0.386592
CGACAC	1.2304	1.1515	1.1331	0	0	0	1.1331	0.6152	0.57575	0.387342
AAGAAU	1.079	1.2511	1.1848	0	0	0	1.1848	0.5395	0.62555	0.391642
AACCGA	1.169	1.1843	1.1611	0	0	0	1.1611	0.5845	0.59215	0.389625
GAGAGC	1.1771	1.1634	1.1728	0	0	0	1.1728	0.58855	0.5817	0.390508
CAGAAG	1.1232	1.1934	1.1959	0	0	0	1.1959	0.5616	0.5967	0.392367
GAAGCC	1.1672	1.1684	1.1756	0	0	0	1.1756	0.5836	0.5842	0.390567
GAGUUC	1.1688	1.1557	1.1867	0	0	0	1.1867	0.5844	0.57785	0.391492
AUUCUG	1.1914	1.2209	1.0981	0	0	0	1.0981	0.5957	0.61045	0.384042
AGAAGC	1.1376	1.2061	1.1667	0	0	0	1.1667	0.5688	0.60305	0.389758
GCUCGA	1.2049	1.1558	1.1442	0	0	0	1.1442	0.60245	0.5779	0.387425
CCCCUG	1.2133	1.1211	1.1686	0	0	0	1.1686	0.60665	0.56055	0.3893
CCCGUG	1.2288	1.1048	1.1647	0	0	0	1.1647	0.6144	0.5524	0.388583
GCCAGA	1.1598	1.1627	1.1739	0	0	0	1.1739	0.5799	0.58135	0.389192
AUUCCG	1.1957	1.1355	1.1645	0	0	0	1.1645	0.59785	0.56775	0.38835
CCGGAG	1.2133	1.1079	1.1733	0	0	0	1.1733	0.60665	0.55395	0.388983
CAAGAG	1.1311	1.1956	1.1665	0	0	0	1.1665	0.56555	0.5978	0.388308
AGAUGC	1.1828	1.1656	1.1448	0	0	0	1.1448	0.5914	0.5828	0.3865
UCCGGG	1.2174	1.0966	1.1788	0	0	0	1.1788	0.6087	0.5483	0.3893
ACCAGA	1.1593	1.1845	1.1483	0	0	0	1.1483	0.57965	0.59225	0.3867
AGCGAU	1.1432	1.2102	1.1383	0	0	0	1.1383	0.5716	0.6051	0.385833
GAAUCC	1.1934	1.1659	1.1304	0	0	0	1.1304	0.5967	0.58295	0.385008
CUGGGA	1.1663	1.1424	1.1804	0	0	0	1.1804	0.58315	0.5712	0.389125
AAGACA	1.1149	1.2201	1.153	0	0	0	1.153	0.55745	0.61005	0.38675
CGCCUG	1.2053	1.1025	1.1793	0	0	0	1.1793	0.60265	0.55125	0.388867
AGAAUC	1.1304	1.1887	1.1665	0	0	0	1.1665	0.5652	0.59435	0.387675
AAAAGC	1.1008	1.223	1.1607	0	0	0	1.1607	0.5504	0.6115	0.3871
AUGCCC	1.2206	1.1248	1.1383	0	0	0	1.1383	0.6103	0.5624	0.385167
UGUUGA	1.1597	1.2188	1.1043	0	0	0	1.1043	0.57985	0.6094	0.382258
AGCCUG	1.1952	1.1384	1.1488	0	0	0	1.1488	0.5976	0.5692	0.385933
GAACCC	1.1943	1.1364	1.1516	0	0	0	1.1516	0.59715	0.5682	0.386158
AGGAGA	1.1321	1.1815	1.1685	0	0	0	1.1685	0.56605	0.59075	0.38755
CCCUUG	1.2231	1.1122	1.1465	0	0	0	1.1465	0.61155	0.5561	0.385692
UGAGAC	1.1575	1.1744	1.1498	0	0	0	1.1498	0.57875	0.5872	0.385958
UUCCAG	1.1779	1.1473	1.1562	0	0	0	1.1562	0.58895	0.57365	0.386467
CCAGGA	1.1617	1.1435	1.1759	0	0	0	1.1759	0.58085	0.57175	0.388083
UGGGAA	1.1552	1.1702	1.1556	0	0	0	1.1556	0.5776	0.5851	0.386383
ACCUUG	1.2102	1.1345	1.1338	0	0	0	1.1338	0.6051	0.56725	0.384358
CCAGGG	1.1673	1.1345	1.1753	0	0	0	1.1753	0.58365	0.56725	0.3877
GACUUG	1.1824	1.1501	1.1438	0	0	0	1.1438	0.5912	0.57505	0.385008
CCAAAG	1.1348	1.1651	1.175	0	0	0	1.175	0.5674	0.58255	0.387492
CGCCCA	1.2037	1.1097	1.1612	0	0	0	1.1612	0.60185	0.55485	0.386317
UUGACC	1.1904	1.1276	1.1546	0	0	0	1.1546	0.5952	0.5638	0.3856
ACCUGG	1.1916	1.1139	1.1663	0	0	0	1.1663	0.5958	0.55695	0.386508
GACCUG	1.1854	1.1365	1.148	0	0	0	1.148	0.5927	0.56825	0.384825
GAUAAG	1.1329	1.2144	1.1223	0	0	0	1.1223	0.56645	0.6072	0.382658
GCGAAA	1.1123	1.2034	1.1521	0	0	0	1.1521	0.55615	0.6017	0.384992
AAUUCC	1.1552	1.1525	1.1598	0	0	0	1.1598	0.5776	0.57625	0.385608
ACGAUU	1.141	1.2041	1.12	0	0	0	1.12	0.5705	0.60205	0.382092
CCCGCC	1.2054	1.0804	1.179	0	0	0	1.179	0.6027	0.5402	0.386983
CCCAAA	1.1398	1.172	1.1522	0	0	0	1.1522	0.5699	0.586	0.384683
UCCAGA	1.1434	1.1434	1.177	0	0	0	1.177	0.5717	0.5717	0.386733
GAAUUU	1.1419	1.1893	1.1312	0	0	0	1.1312	0.57095	0.59465	0.3828
GCCUUG	1.1949	1.1271	1.1376	0	0	0	1.1376	0.59745	0.56355	0.3831
UCCCGA	1.2	1.1164	1.1431	0	0	0	1.1431	0.6	0.5582	0.38355
GCGUGA	1.1174	1.1872	1.1543	0	0	0	1.1543	0.5587	0.5936	0.384433
GGAAUG	1.1633	1.1605	1.1346	0	0	0	1.1346	0.58165	0.58025	0.38275
CGCAGA	1.165	1.1452	1.1481	0	0	0	1.1481	0.5825	0.5726	0.383867
GGCCCC	1.1692	1.0907	1.1981	0	0	0	1.1981	0.5846	0.54535	0.388008
GAAGAC	1.1445	1.168	1.1451	0	0	0	1.1451	0.57225	0.584	0.383558
AGAACA	1.0855	1.2245	1.146	0	0	0	1.146	0.54275	0.61225	0.3835
CCGCCC	1.2167	1.0769	1.1612	0	0	0	1.1612	0.60835	0.53845	0.384667
CACUUG	1.1662	1.1447	1.1435	0	0	0	1.1435	0.5831	0.57235	0.383158
GAUCUG	1.1955	1.1438	1.1136	0	0	0	1.1136	0.59775	0.5719	0.380542
CAGAUU	1.1445	1.1798	1.1284	0	0	0	1.1284	0.57225	0.5899	0.381758
CACCAG	1.1759	1.1198	1.1552	0	0	0	1.1552	0.58795	0.5599	0.383842
CCACGA	1.1666	1.1337	1.1504	0	0	0	1.1504	0.5833	0.56685	0.383425
GCACCU	1.2052	1.1103	1.1348	0	0	0	1.1348	0.6026	0.55515	0.382092
AUUUUU	1.1377	1.1939	1.1183	0	0	0	1.1183	0.56885	0.59695	0.380683
GACACA	1.1522	1.1641	1.1318	0	0	0	1.1318	0.5761	0.58205	0.381658
CAGAAU	1.1214	1.1801	1.1464	0	0	0	1.1464	0.5607	0.59005	0.382858
CGCGAU	1.1696	1.1515	1.1263	0	0	0	1.1263	0.5848	0.57575	0.381142
CCCAUG	1.204	1.1232	1.1198	0	0	0	1.1198	0.602	0.5616	0.380567
GGGAAC	1.1363	1.1387	1.1711	0	0	0	1.1711	0.56815	0.56935	0.384767
GGAAGA	1.1326	1.1691	1.1443	0	0	0	1.1443	0.5663	0.58455	0.382525
UUUGAC	1.1688	1.1546	1.1226	0	0	0	1.1226	0.5844	0.5773	0.380717
CCAGAU	1.1632	1.1468	1.1351	0	0	0	1.1351	0.5816	0.5734	0.381683
CCGGGU	1.1914	1.0798	1.1739	0	0	0	1.1739	0.5957	0.5399	0.384917
GAAAUU	1.0955	1.2314	1.1181	0	0	0	1.1181	0.54775	0.6157	0.380258
GAAACA	1.0746	1.2136	1.1564	0	0	0	1.1564	0.5373	0.6068	0.383417
ACCCCC	1.2095	1.0815	1.1534	0	0	0	1.1534	0.60475	0.54075	0.38315
AGGAAA	1.0883	1.206	1.1493	0	0	0	1.1493	0.54415	0.603	0.382742
AAACUG	1.1035	1.1988	1.1408	0	0	0	1.1408	0.55175	0.5994	0.381992
AAAGCC	1.1349	1.1788	1.1293	0	0	0	1.1293	0.56745	0.5894	0.381025
UGACGC	1.1841	1.1057	1.1532	0	0	0	1.1532	0.59205	0.55285	0.383017
GGGAGA	1.171	1.1382	1.1337	0	0	0	1.1337	0.5855	0.5691	0.381383
UGAAUG	1.1307	1.1952	1.1166	0	0	0	1.1166	0.56535	0.5976	0.379925
GAGGAU	1.1576	1.1298	1.1551	0	0	0	1.1551	0.5788	0.5649	0.383133
GUCUGA	1.1209	1.1787	1.1427	0	0	0	1.1427	0.56045	0.58935	0.382083
AUGAAG	1.1429	1.2042	1.0943	0	0	0	1.0943	0.57145	0.6021	0.377975
AAGCCC	1.1685	1.1293	1.1434	0	0	0	1.1434	0.58425	0.56465	0.38205
GAGCCC	1.1806	1.117	1.1435	0	0	0	1.1435	0.5903	0.5585	0.38205
CGAGUU	1.1564	1.1293	1.1543	0	0	0	1.1543	0.5782	0.56465	0.382858
GAGAUA	1.1171	1.1855	1.1366	0	0	0	1.1366	0.55855	0.59275	0.381317
GAGAGG	1.1556	1.1141	1.1686	0	0	0	1.1686	0.5778	0.55705	0.383908
UCGAUU	1.1323	1.1854	1.1204	0	0	0	1.1204	0.56615	0.5927	0.379875
CGACCC	1.1982	1.0845	1.1548	0	0	0	1.1548	0.5991	0.54225	0.382692
UGGCCC	1.1755	1.1055	1.1557	0	0	0	1.1557	0.58775	0.55275	0.3827
GCCCUG	1.1896	1.1045	1.1418	0	0	0	1.1418	0.5948	0.55225	0.381475
UGAAAC	1.0954	1.2156	1.1242	0	0	0	1.1242	0.5477	0.6078	0.37995
ACACCG	1.1692	1.1182	1.1477	0	0	0	1.1477	0.5846	0.5591	0.3819
GACAUG	1.1439	1.1726	1.1176	0	0	0	1.1176	0.57195	0.5863	0.379308
UAGAGA	1.1268	1.2101	1.0971	0	0	0	1.0971	0.5634	0.60505	0.377592
AACCUG	1.1563	1.1524	1.1241	0	0	0	1.1241	0.57815	0.5762	0.379742
CGGGAG	1.1796	1.0965	1.1545	0	0	0	1.1545	0.5898	0.54825	0.382092
AUUGCC	1.177	1.1599	1.0933	0	0	0	1.0933	0.5885	0.57995	0.376958
AGAUUG	1.1436	1.1744	1.112	0	0	0	1.112	0.5718	0.5872	0.3785
CCCAGC	1.168	1.1162	1.1449	0	0	0	1.1449	0.584	0.5581	0.381167
CGAGGG	1.1362	1.1154	1.1742	0	0	0	1.1742	0.5681	0.5577	0.383333
CAAAAG	1.0665	1.2089	1.1497	0	0	0	1.1497	0.53325	0.60445	0.381233
AAAACG	1.0842	1.1971	1.1434	0	0	0	1.1434	0.5421	0.59855	0.380675
GGAAAG	1.1077	1.1598	1.1564	0	0	0	1.1564	0.55385	0.5799	0.381692
GAUCCG	1.1647	1.117	1.142	0	0	0	1.142	0.58235	0.5585	0.380475
AGGCCC	1.1766	1.0931	1.1531	0	0	0	1.1531	0.5883	0.54655	0.381325
CUGAAA	1.0881	1.1817	1.1522	0	0	0	1.1522	0.54405	0.59085	0.381183
UCCCGG	1.1895	1.0743	1.1575	0	0	0	1.1575	0.59475	0.53715	0.381567
AGAGGA	1.1128	1.1429	1.1646	0	0	0	1.1646	0.5564	0.57145	0.382075
CCGCAG	1.1602	1.1107	1.1485	0	0	0	1.1485	0.5801	0.55535	0.380658
GAUCCC	1.1688	1.1089	1.1417	0	0	0	1.1417	0.5844	0.55445	0.380092
GGCUGA	1.1726	1.1198	1.1267	0	0	0	1.1267	0.5863	0.5599	0.378817
GAAGAU	1.1182	1.1766	1.1229	0	0	0	1.1229	0.5591	0.5883	0.378383
UGAAAG	1.0782	1.2026	1.1369	0	0	0	1.1369	0.5391	0.6013	0.37955
UGAAGA	1.1128	1.1729	1.1307	0	0	0	1.1307	0.5564	0.58645	0.378925
GAUCCA	1.1543	1.1485	1.1129	0	0	0	1.1129	0.57715	0.57425	0.377383
GACCCA	1.1504	1.1222	1.1426	0	0	0	1.1426	0.5752	0.5611	0.379817
AAGACC	1.1374	1.1529	1.1244	0	0	0	1.1244	0.5687	0.57645	0.378258
CGCACC	1.1955	1.0747	1.1411	0	0	0	1.1411	0.59775	0.53735	0.379367
GCAAAA	1.0724	1.2063	1.1314	0	0	0	1.1314	0.5362	0.60315	0.378458
CCCUGG	1.1699	1.0874	1.1518	0	0	0	1.1518	0.58495	0.5437	0.380075
UUGGCA	1.1422	1.1178	1.1478	0	0	0	1.1478	0.5711	0.5589	0.379633
CCAGGC	1.1523	1.0961	1.1581	0	0	0	1.1581	0.57615	0.54805	0.380383
AUUUGC	1.1778	1.1702	1.0584	0	0	0	1.0584	0.5889	0.5851	0.372067
UGCCUG	1.193	1.1202	1.0924	0	0	0	1.0924	0.5965	0.5601	0.374833
CGGGGA	1.1477	1.1009	1.1567	0	0	0	1.1567	0.57385	0.55045	0.380167
UGACAU	1.1446	1.1429	1.1176	0	0	0	1.1176	0.5723	0.57145	0.376892
AACGAG	1.1238	1.1756	1.1049	0	0	0	1.1049	0.5619	0.5878	0.375767
UGCGAU	1.1422	1.1482	1.1127	0	0	0	1.1127	0.5711	0.5741	0.376317
CCCACC	1.1806	1.0849	1.1368	0	0	0	1.1368	0.5903	0.54245	0.378258
UGACAG	1.1517	1.1376	1.1124	0	0	0	1.1124	0.57585	0.5688	0.376175
AUUCGA	1.1297	1.1624	1.1081	0	0	0	1.1081	0.56485	0.5812	0.375692
AUGAGC	1.141	1.1604	1.0988	0	0	0	1.0988	0.5705	0.5802	0.374917
CGAGCC	1.1673	1.0978	1.1349	0	0	0	1.1349	0.58365	0.5489	0.377908
CGAGGC	1.1491	1.0845	1.1656	0	0	0	1.1656	0.57455	0.54225	0.3804
AGAAGG	1.0908	1.147	1.1612	0	0	0	1.1612	0.5454	0.5735	0.380017
AUAUGA	1.1038	1.226	1.0688	0	0	0	1.0688	0.5519	0.613	0.372283
AGAUGG	1.1216	1.1409	1.1355	0	0	0	1.1355	0.5608	0.57045	0.377792
GAAAGG	1.1127	1.1533	1.1318	0	0	0	1.1318	0.55635	0.57665	0.377467
GAGGAG	1.1161	1.1193	1.1601	0	0	0	1.1601	0.55805	0.55965	0.379633
UGACUG	1.1427	1.1276	1.1248	0	0	0	1.1248	0.57135	0.5638	0.376658
ACCGAU	1.1278	1.1512	1.1149	0	0	0	1.1149	0.5639	0.5756	0.375733
GCCCCC	1.1727	1.0658	1.1552	0	0	0	1.1552	0.58635	0.5329	0.379075
AUGACG	1.1415	1.1569	1.0952	0	0	0	1.0952	0.57075	0.57845	0.374067
AUUUUC	1.1314	1.1647	1.0972	0	0	0	1.0972	0.5657	0.58235	0.374208
GAGGGG	1.107	1.1307	1.1556	0	0	0	1.1556	0.5535	0.56535	0.379075
UGGCAG	1.1443	1.1418	1.1069	0	0	0	1.1069	0.57215	0.5709	0.374992
GGCGCC	1.1721	1.0571	1.1632	0	0	0	1.1632	0.58605	0.52855	0.379633
UGAGCC	1.1342	1.1215	1.1358	0	0	0	1.1358	0.5671	0.56075	0.377275
AGGCAC	1.17	1.0937	1.1255	0	0	0	1.1255	0.585	0.54685	0.376225
GAAGCA	1.0919	1.1351	1.1615	0	0	0	1.1615	0.54595	0.56755	0.379167
UUGCCC	1.1813	1.0857	1.1196	0	0	0	1.1196	0.59065	0.54285	0.375517
UUCCGA	1.1376	1.1222	1.1263	0	0	0	1.1263	0.5688	0.5611	0.376033
CGAGCA	1.1213	1.1244	1.1394	0	0	0	1.1394	0.56065	0.5622	0.377042
CACGAU	1.1351	1.136	1.113	0	0	0	1.113	0.56755	0.568	0.374758
AGCCGA	1.146	1.1203	1.1167	0	0	0	1.1167	0.573	0.56015	0.374975
AACCCA	1.1523	1.1197	1.1102	0	0	0	1.1102	0.57615	0.55985	0.374367
CCGACA	1.1754	1.0969	1.1099	0	0	0	1.1099	0.5877	0.54845	0.374342
AACUUG	1.1081	1.1499	1.1238	0	0	0	1.1238	0.55405	0.57495	0.375467
AUGAGG	1.1144	1.1591	1.1065	0	0	0	1.1065	0.5572	0.57955	0.373875
CUUGGC	1.1609	1.0704	1.1485	0	0	0	1.1485	0.58045	0.5352	0.377358
GACAGA	1.0991	1.1334	1.147	0	0	0	1.147	0.54955	0.5667	0.377208
CAGGAA	1.0841	1.1511	1.1438	0	0	0	1.1438	0.54205	0.57555	0.3769
GAAACG	1.0856	1.1494	1.1432	0	0	0	1.1432	0.5428	0.5747	0.376783
GCCCAA	1.127	1.1179	1.1331	0	0	0	1.1331	0.5635	0.55895	0.375925
GCACCG	1.1443	1.0938	1.1398	0	0	0	1.1398	0.57215	0.5469	0.376475
GGAAUU	1.1397	1.145	1.0931	0	0	0	1.0931	0.56985	0.5725	0.372575
CAGGGG	1.1142	1.0983	1.1652	0	0	0	1.1652	0.5571	0.54915	0.378575
AAACGA	1.08	1.1864	1.1113	0	0	0	1.1113	0.54	0.5932	0.374083
CGAUGU	1.1307	1.1604	1.0859	0	0	0	1.0859	0.56535	0.5802	0.371908
CCAGCC	1.1506	1.0862	1.1399	0	0	0	1.1399	0.5753	0.5431	0.376383
GAUACA	1.1094	1.1675	1.0992	0	0	0	1.0992	0.5547	0.58375	0.372942
GGCAUG	1.1352	1.1387	1.1022	0	0	0	1.1022	0.5676	0.56935	0.373192
GCAAUG	1.1334	1.1439	1.0984	0	0	0	1.0984	0.5667	0.57195	0.372842
ACCGGG	1.1476	1.0702	1.1578	0	0	0	1.1578	0.5738	0.5351	0.377783
AAACCG	1.0981	1.1342	1.1431	0	0	0	1.1431	0.54905	0.5671	0.376542
AUGGGA	1.1316	1.1373	1.1063	0	0	0	1.1063	0.5658	0.56865	0.373458
CUCGAU	1.139	1.1268	1.1092	0	0	0	1.1092	0.5695	0.5634	0.373683
GCCCGU	1.1742	1.0693	1.1312	0	0	0	1.1312	0.5871	0.53465	0.375492
CUGGGG	1.1438	1.0703	1.1602	0	0	0	1.1602	0.5719	0.53515	0.377875
CCUGGA	1.1468	1.0843	1.1421	0	0	0	1.1421	0.5734	0.54215	0.376275
CGGGGG	1.1585	1.0585	1.1561	0	0	0	1.1561	0.57925	0.52925	0.377433
CACCGG	1.1365	1.0972	1.1385	0	0	0	1.1385	0.56825	0.5486	0.375892
GGCAGA	1.1111	1.1284	1.1321	0	0	0	1.1321	0.55555	0.5642	0.375308
AAUUUG	1.0844	1.1808	1.1062	0	0	0	1.1062	0.5422	0.5904	0.373133
CUCAGA	1.0978	1.1245	1.1491	0	0	0	1.1491	0.5489	0.56225	0.376708
GAACAC	1.1016	1.1318	1.1378	0	0	0	1.1378	0.5508	0.5659	0.37575
GAGCAG	1.1109	1.0982	1.1621	0	0	0	1.1621	0.55545	0.5491	0.377775
ACAUCC	1.1709	1.1	1.099	0	0	0	1.099	0.58545	0.55	0.372408
GAACGA	1.0951	1.1546	1.1201	0	0	0	1.1201	0.54755	0.5773	0.374158
UCUGAG	1.1231	1.1037	1.1422	0	0	0	1.1422	0.56155	0.55185	0.375933
CGCGAA	1.1096	1.1373	1.1217	0	0	0	1.1217	0.5548	0.56865	0.374192
UUGCGC	1.1511	1.1067	1.1105	0	0	0	1.1105	0.57555	0.55335	0.373233
CAGAGG	1.1012	1.1194	1.147	0	0	0	1.147	0.5506	0.5597	0.376217
AGAGCC	1.1394	1.1004	1.1269	0	0	0	1.1269	0.5697	0.5502	0.374467
AGGGGG	1.0979	1.0937	1.174	0	0	0	1.174	0.54895	0.54685	0.3783
AAGAAC	1.0743	1.1831	1.1081	0	0	0	1.1081	0.53715	0.59155	0.3728
UCCGAU	1.1485	1.1165	1.0993	0	0	0	1.0993	0.57425	0.55825	0.371967
GGCCUG	1.1459	1.0854	1.1327	0	0	0	1.1327	0.57295	0.5427	0.374725
UGAACC	1.1258	1.1236	1.1143	0	0	0	1.1143	0.5629	0.5618	0.373167
AGACAG	1.096	1.1375	1.1291	0	0	0	1.1291	0.548	0.56875	0.374308
CGAAAG	1.0907	1.1474	1.1243	0	0	0	1.1243	0.54535	0.5737	0.373892
CAGAAC	1.1052	1.1317	1.1255	0	0	0	1.1255	0.5526	0.56585	0.373992
CGCCCC	1.1704	1.0509	1.141	0	0	0	1.141	0.5852	0.52545	0.375275
ACCCAC	1.1669	1.0813	1.1136	0	0	0	1.1136	0.58345	0.54065	0.37295
GAGCCA	1.1263	1.1171	1.1163	0	0	0	1.1163	0.56315	0.55855	0.373
UUCGAG	1.1043	1.1162	1.1392	0	0	0	1.1392	0.55215	0.5581	0.374908
ACACCA	1.1569	1.1005	1.1012	0	0	0	1.1012	0.57845	0.55025	0.37165
GACGAG	1.1169	1.1275	1.1137	0	0	0	1.1137	0.55845	0.56375	0.37265
AAAAUU	1.0474	1.2048	1.1057	0	0	0	1.1057	0.5237	0.6024	0.371967
CAAUUG	1.1235	1.1335	1.1001	0	0	0	1.1001	0.56175	0.56675	0.371433
GAGGCC	1.1522	1.0729	1.132	0	0	0	1.132	0.5761	0.53645	0.374092
AUUUCC	1.1517	1.1322	1.073	0	0	0	1.073	0.57585	0.5661	0.369158
AAGAGG	1.0793	1.1538	1.1238	0	0	0	1.1238	0.53965	0.5769	0.373392
AAAGAU	1.0602	1.1879	1.1084	0	0	0	1.1084	0.5301	0.59395	0.372075
ACCACC	1.1521	1.0904	1.1131	0	0	0	1.1131	0.57605	0.5452	0.372392
UUUCUG	1.1442	1.1276	1.0836	0	0	0	1.0836	0.5721	0.5638	0.369917
CUGUGA	1.107	1.1469	1.1008	0	0	0	1.1008	0.5535	0.57345	0.371292
UGACGA	1.1344	1.1381	1.0817	0	0	0	1.0817	0.5672	0.56905	0.369658
GAACCA	1.106	1.1415	1.1064	0	0	0	1.1064	0.553	0.57075	0.371692
CUGAGG	1.1445	1.0737	1.1355	0	0	0	1.1355	0.57225	0.53685	0.3741
CCAGAC	1.1306	1.1	1.1231	0	0	0	1.1231	0.5653	0.55	0.373067
CUGACA	1.1297	1.1083	1.1148	0	0	0	1.1148	0.56485	0.55415	0.3723
UACUGA	1.114	1.155	1.083	0	0	0	1.083	0.557	0.5775	0.369583
UUCGAU	1.1278	1.1235	1.1007	0	0	0	1.1007	0.5639	0.56175	0.371058
GACACG	1.1322	1.1031	1.1159	0	0	0	1.1159	0.5661	0.55155	0.372258
AUUGAC	1.1227	1.1439	1.0838	0	0	0	1.0838	0.56135	0.57195	0.369517
CCCGCA	1.1599	1.0568	1.1329	0	0	0	1.1329	0.57995	0.5284	0.373542
GAGGCA	1.1088	1.1107	1.129	0	0	0	1.129	0.5544	0.55535	0.373125
CUCGGG	1.1336	1.0907	1.1242	0	0	0	1.1242	0.5668	0.54535	0.372725
UGGCGC	1.1585	1.0874	1.1026	0	0	0	1.1026	0.57925	0.5437	0.370925
CCGGCC	1.1394	1.0711	1.1377	0	0	0	1.1377	0.5697	0.53555	0.373825
GAUAAU	1.0696	1.2035	1.0749	0	0	0	1.0749	0.5348	0.60175	0.368575
GAGCAA	1.0782	1.1535	1.1162	0	0	0	1.1162	0.5391	0.57675	0.372008
AUGAAC	1.0838	1.1713	1.0926	0	0	0	1.0926	0.5419	0.58565	0.370025
CAAAUG	1.0719	1.1738	1.1017	0	0	0	1.1017	0.53595	0.5869	0.370758
GAACAG	1.0624	1.1603	1.1244	0	0	0	1.1244	0.5312	0.58015	0.372625
CGAAUG	1.1162	1.1227	1.1077	0	0	0	1.1077	0.5581	0.56135	0.371192
AGAGCA	1.0665	1.1517	1.1278	0	0	0	1.1278	0.53325	0.57585	0.372817
CAGCCC	1.1282	1.0698	1.1479	0	0	0	1.1479	0.5641	0.5349	0.374483
CCAAGG	1.117	1.1051	1.1237	0	0	0	1.1237	0.5585	0.55255	0.372458
GGGGCA	1.1209	1.0879	1.1369	0	0	0	1.1369	0.56045	0.54395	0.37355
AGACGC	1.1354	1.0832	1.1259	0	0	0	1.1259	0.5677	0.5416	0.372533
GCCACC	1.1622	1.0587	1.1217	0	0	0	1.1217	0.5811	0.52935	0.372025
CGAAAC	1.0928	1.1341	1.1154	0	0	0	1.1154	0.5464	0.56705	0.371475
CCGACC	1.161	1.0664	1.1145	0	0	0	1.1145	0.5805	0.5332	0.371367
CAGCGA	1.095	1.1185	1.1275	0	0	0	1.1275	0.5475	0.55925	0.372375
UAGAUG	1.1038	1.169	1.0675	0	0	0	1.0675	0.5519	0.5845	0.367317
CGGAAA	1.0926	1.1268	1.1209	0	0	0	1.1209	0.5463	0.5634	0.371767
AUUUCG	1.1082	1.1249	1.1069	0	0	0	1.1069	0.5541	0.56245	0.370575
UGGCGA	1.1319	1.094	1.1139	0	0	0	1.1139	0.56595	0.547	0.371142
GCACCA	1.1379	1.0821	1.1192	0	0	0	1.1192	0.56895	0.54105	0.371533
UGGUGA	1.0886	1.1489	1.1003	0	0	0	1.1003	0.5443	0.57445	0.369842
AGAGGC	1.0993	1.1285	1.1099	0	0	0	1.1099	0.54965	0.56425	0.370633
AUGGCU	1.145	1.1425	1.0498	0	0	0	1.0498	0.5725	0.57125	0.365592
UGAGGA	1.1049	1.107	1.1254	0	0	0	1.1254	0.55245	0.5535	0.371892
UACACC	1.1815	1.0815	1.0737	0	0	0	1.0737	0.59075	0.54075	0.367533
AUUCGC	1.1347	1.12	1.0811	0	0	0	1.0811	0.56735	0.56	0.368075
CUAGAA	1.0976	1.148	1.0889	0	0	0	1.0889	0.5488	0.574	0.368617
GACCGA	1.0994	1.1	1.1347	0	0	0	1.1347	0.5497	0.55	0.3724
AUUUGG	1.1021	1.1666	1.065	0	0	0	1.065	0.55105	0.5833	0.366558
GCAAGA	1.0895	1.1188	1.1254	0	0	0	1.1254	0.54475	0.5594	0.371592
AGGGGA	1.078	1.1288	1.1251	0	0	0	1.1251	0.539	0.5644	0.371417
AGACGA	1.0948	1.1315	1.1052	0	0	0	1.1052	0.5474	0.56575	0.369725
GCAGAG	1.0992	1.1113	1.1203	0	0	0	1.1203	0.5496	0.55565	0.370925
AGCCCA	1.1156	1.085	1.1298	0	0	0	1.1298	0.5578	0.5425	0.371683
CGAGUG	1.1364	1.1092	1.0846	0	0	0	1.0846	0.5682	0.5546	0.3679
GGCCAG	1.1043	1.0741	1.1518	0	0	0	1.1518	0.55215	0.53705	0.3735
AUUGGC	1.1345	1.093	1.1025	0	0	0	1.1025	0.56725	0.5465	0.369375
CCUGAC	1.137	1.0685	1.1244	0	0	0	1.1244	0.5685	0.53425	0.371192
GCGCGA	1.0994	1.1167	1.113	0	0	0	1.113	0.5497	0.55835	0.370175
CCAAUG	1.1342	1.1179	1.0767	0	0	0	1.0767	0.5671	0.55895	0.367125
GAGCGA	1.0997	1.1104	1.1182	0	0	0	1.1182	0.54985	0.5552	0.370542
GAAAUC	1.0552	1.1426	1.1301	0	0	0	1.1301	0.5276	0.5713	0.3715
GAGGGA	1.0908	1.1247	1.1122	0	0	0	1.1122	0.5454	0.56235	0.369992
GAACCG	1.1053	1.0928	1.129	0	0	0	1.129	0.55265	0.5464	0.371342
UCCGAA	1.0985	1.1022	1.1259	0	0	0	1.1259	0.54925	0.5511	0.371042
GCGAGG	1.0859	1.1005	1.1399	0	0	0	1.1399	0.54295	0.55025	0.372183
GGGGAG	1.1008	1.0878	1.1377	0	0	0	1.1377	0.5504	0.5439	0.372
GAGCAC	1.1031	1.1082	1.1137	0	0	0	1.1137	0.55155	0.5541	0.369892
GGCAGG	1.1233	1.087	1.1146	0	0	0	1.1146	0.56165	0.5435	0.369958
AGGAUG	1.1014	1.1036	1.1198	0	0	0	1.1198	0.5507	0.5518	0.370383
GAUACG	1.1016	1.1326	1.0902	0	0	0	1.0902	0.5508	0.5663	0.367883
GGAGAG	1.1229	1.1007	1.1006	0	0	0	1.1006	0.56145	0.55035	0.368733
GAUAUC	1.0803	1.1561	1.0877	0	0	0	1.0877	0.54015	0.57805	0.36765
UUCCAA	1.1006	1.1005	1.1224	0	0	0	1.1224	0.5503	0.55025	0.370492
AAGCAC	1.1001	1.1073	1.1158	0	0	0	1.1158	0.55005	0.55365	0.369917
CGGAGA	1.1271	1.0848	1.1113	0	0	0	1.1113	0.56355	0.5424	0.369542
GCCUGG	1.1246	1.0495	1.149	0	0	0	1.149	0.5623	0.52475	0.372675
CCAUUG	1.1455	1.1004	1.0772	0	0	0	1.0772	0.57275	0.5502	0.366692
UUUGAG	1.0768	1.1349	1.1104	0	0	0	1.1104	0.5384	0.56745	0.369375
UUCACC	1.1576	1.0789	1.0855	0	0	0	1.0855	0.5788	0.53945	0.367292
GGGGGC	1.135	1.0462	1.1403	0	0	0	1.1403	0.5675	0.5231	0.371817
ACAGAA	1.045	1.1521	1.1243	0	0	0	1.1243	0.5225	0.57605	0.370475
CCAGCG	1.1245	1.0919	1.1045	0	0	0	1.1045	0.56225	0.54595	0.368783
ACCCCA	1.1413	1.0788	1.1001	0	0	0	1.1001	0.57065	0.5394	0.368358
UAGAAA	1.0454	1.1856	1.0885	0	0	0	1.0885	0.5227	0.5928	0.367333
GACAGC	1.1258	1.0852	1.1081	0	0	0	1.1081	0.5629	0.5426	0.368933
CAGGAG	1.1108	1.0972	1.1097	0	0	0	1.1097	0.5554	0.5486	0.36895
GAGACG	1.1177	1.1059	1.0939	0	0	0	1.0939	0.55885	0.55295	0.367617
UUGACG	1.1393	1.1039	1.074	0	0	0	1.074	0.56965	0.55195	0.365933
AAAGGG	1.0701	1.1235	1.1234	0	0	0	1.1234	0.53505	0.56175	0.370033
AUUGCA	1.1483	1.1152	1.0525	0	0	0	1.0525	0.57415	0.5576	0.364042
GAAGGC	1.0823	1.1003	1.1334	0	0	0	1.1334	0.54115	0.55015	0.370783
UGGAGA	1.1216	1.1076	1.0867	0	0	0	1.0867	0.5608	0.5538	0.366883
ACUGAG	1.0792	1.1276	1.1083	0	0	0	1.1083	0.5396	0.5638	0.368617
ACGUGA	1.0939	1.1346	1.0862	0	0	0	1.0862	0.54695	0.5673	0.366742
GUUCCA	1.1205	1.0788	1.1154	0	0	0	1.1154	0.56025	0.5394	0.369175
AGAAUA	1.0339	1.1824	1.0979	0	0	0	1.0979	0.51695	0.5912	0.367675
CCCCGC	1.1417	1.0427	1.1288	0	0	0	1.1288	0.57085	0.52135	0.370167
GCAUCC	1.1387	1.0628	1.1099	0	0	0	1.1099	0.56935	0.5314	0.368442
CCUCGA	1.1245	1.0754	1.1115	0	0	0	1.1115	0.56225	0.5377	0.368575
AAAACA	1.0018	1.2029	1.1064	0	0	0	1.1064	0.5009	0.60145	0.368125
CGGGAU	1.1642	1.0455	1.1003	0	0	0	1.1003	0.5821	0.52275	0.367525
UGCGCC	1.1433	1.0472	1.1183	0	0	0	1.1183	0.57165	0.5236	0.368925
AUUUCU	1.1101	1.117	1.0816	0	0	0	1.0816	0.55505	0.5585	0.365858
CCGGGC	1.1444	1.0311	1.1323	0	0	0	1.1323	0.5722	0.51555	0.370008
AGUUCC	1.1228	1.0795	1.1053	0	0	0	1.1053	0.5614	0.53975	0.367742
UUUUCC	1.1189	1.0711	1.1176	0	0	0	1.1176	0.55945	0.53555	0.368767
CUCCGA	1.124	1.0931	1.0903	0	0	0	1.0903	0.562	0.54655	0.366475
UUAUGA	1.0967	1.1853	1.0248	0	0	0	1.0248	0.54835	0.59265	0.360967
GACCAG	1.1095	1.0926	1.1047	0	0	0	1.1047	0.55475	0.5463	0.367625
GGUUCC	1.1077	1.0441	1.155	0	0	0	1.155	0.55385	0.52205	0.371817
ACGAGG	1.0928	1.1006	1.113	0	0	0	1.113	0.5464	0.5503	0.368283
AAUGGC	1.1014	1.1213	1.0831	0	0	0	1.0831	0.5507	0.56065	0.365742
CGGCCC	1.1328	1.0497	1.123	0	0	0	1.123	0.5664	0.52485	0.369042
GAGACU	1.1134	1.112	1.0798	0	0	0	1.0798	0.5567	0.556	0.365417
GCCGAU	1.1307	1.0845	1.0887	0	0	0	1.0887	0.56535	0.54225	0.36605
UUCCGG	1.1348	1.0639	1.1051	0	0	0	1.1051	0.5674	0.53195	0.367408
UUCCAC	1.1322	1.0592	1.1113	0	0	0	1.1113	0.5661	0.5296	0.367833
CGACUG	1.1276	1.0755	1.0994	0	0	0	1.0994	0.5638	0.53775	0.366825
AACGAU	1.0857	1.1602	1.0554	0	0	0	1.0554	0.54285	0.5801	0.363058
AUCCCG	1.1455	1.0456	1.1098	0	0	0	1.1098	0.57275	0.5228	0.367558
AGGAAG	1.0526	1.1352	1.113	0	0	0	1.113	0.5263	0.5676	0.367817
AGCAUG	1.1058	1.1347	1.0601	0	0	0	1.0601	0.5529	0.56735	0.363392
UGGGAG	1.1076	1.103	1.09	0	0	0	1.09	0.5538	0.5515	0.365883
ACACGA	1.0888	1.1078	1.1035	0	0	0	1.1035	0.5444	0.5539	0.366967
GCGGGA	1.1047	1.0886	1.1064	0	0	0	1.1064	0.55235	0.5443	0.367175
AUACCC	1.1644	1.0759	1.059	0	0	0	1.059	0.5822	0.53795	0.363192
AUGAAU	1.0768	1.1777	1.0438	0	0	0	1.0438	0.5384	0.58885	0.361842
AAAGGC	1.0728	1.1235	1.102	0	0	0	1.102	0.5364	0.56175	0.366692
UCCAGG	1.1043	1.0691	1.1246	0	0	0	1.1246	0.55215	0.53455	0.36855
GCCCCA	1.1184	1.0589	1.1207	0	0	0	1.1207	0.5592	0.52945	0.368225
AGCGAG	1.0774	1.1021	1.1179	0	0	0	1.1179	0.5387	0.55105	0.367942
CAUCUG	1.105	1.0874	1.1047	0	0	0	1.1047	0.5525	0.5437	0.366817
CACAGA	1.1001	1.1052	1.0916	0	0	0	1.0916	0.55005	0.5526	0.365708
CAGAGC	1.0884	1.0898	1.1181	0	0	0	1.1181	0.5442	0.5449	0.367867
CCACGG	1.1072	1.068	1.1211	0	0	0	1.1211	0.5536	0.534	0.368117
AACCAG	1.0915	1.1147	1.0901	0	0	0	1.0901	0.54575	0.55735	0.365533
AUUUCA	1.0724	1.1262	1.0972	0	0	0	1.0972	0.5362	0.5631	0.366083
GAAGUG	1.0594	1.1224	1.1138	0	0	0	1.1138	0.5297	0.5612	0.36745
AGCAGA	1.071	1.0905	1.1338	0	0	0	1.1338	0.5355	0.54525	0.369092
GAACUG	1.0743	1.1133	1.1071	0	0	0	1.1071	0.53715	0.55665	0.366817
CUAGAG	1.105	1.0985	1.0911	0	0	0	1.0911	0.5525	0.54925	0.365475
UUGCAC	1.1526	1.0677	1.0743	0	0	0	1.0743	0.5763	0.53385	0.364075
UUGCGA	1.0895	1.1227	1.0816	0	0	0	1.0816	0.54475	0.56135	0.364617
AGAGGG	1.0841	1.0852	1.1238	0	0	0	1.1238	0.54205	0.5426	0.368075
UGCGAG	1.1006	1.0991	1.0932	0	0	0	1.0932	0.5503	0.54955	0.365508
CCAGUG	1.0988	1.0822	1.1117	0	0	0	1.1117	0.5494	0.5411	0.367033
GGGCCC	1.1296	1.0196	1.1434	0	0	0	1.1434	0.5648	0.5098	0.369667
CUGCGA	1.1075	1.0817	1.1028	0	0	0	1.1028	0.55375	0.54085	0.366233
CCUUGC	1.1639	1.0339	1.0933	0	0	0	1.0933	0.58195	0.51695	0.365367
CAGGGA	1.0857	1.1089	1.0963	0	0	0	1.0963	0.54285	0.55445	0.3656
GCACUG	1.1043	1.075	1.1116	0	0	0	1.1116	0.55215	0.5375	0.366875
UCCCCG	1.1133	1.0442	1.1331	0	0	0	1.1331	0.55665	0.5221	0.368642
CAACCC	1.1282	1.0528	1.1094	0	0	0	1.1094	0.5641	0.5264	0.36665
CCCCCA	1.1405	1.0491	1.1008	0	0	0	1.1008	0.57025	0.52455	0.365933
GGGAUG	1.1234	1.0801	1.0861	0	0	0	1.0861	0.5617	0.54005	0.364642
UGCCCC	1.1352	1.0437	1.1097	0	0	0	1.1097	0.5676	0.52185	0.366525
CGACGA	1.1147	1.0947	1.0785	0	0	0	1.0785	0.55735	0.54735	0.363867
AGGUGA	1.0655	1.1236	1.0982	0	0	0	1.0982	0.53275	0.5618	0.365458
GCAGAC	1.1142	1.0683	1.1042	0	0	0	1.1042	0.5571	0.53415	0.365908
AUCCAG	1.1208	1.0768	1.0888	0	0	0	1.0888	0.5604	0.5384	0.3646
UCCACC	1.1325	1.0658	1.088	0	0	0	1.088	0.56625	0.5329	0.364525
UGACAA	1.0687	1.1416	1.0759	0	0	0	1.0759	0.53435	0.5708	0.363508
CAGCCG	1.1362	1.0341	1.1159	0	0	0	1.1159	0.5681	0.51705	0.366842
UUCUUG	1.1072	1.1028	1.0759	0	0	0	1.0759	0.5536	0.5514	0.363483
ACCAGG	1.0913	1.0798	1.1144	0	0	0	1.1144	0.54565	0.5399	0.366658
GAGUUU	1.116	1.1195	1.0498	0	0	0	1.0498	0.558	0.55975	0.361258
GGGUGA	1.1091	1.0862	1.09	0	0	0	1.09	0.55455	0.5431	0.364608
AAACAC	1.0675	1.1386	1.0791	0	0	0	1.0791	0.53375	0.5693	0.363692
CUUGAA	1.0951	1.0858	1.1042	0	0	0	1.1042	0.54755	0.5429	0.365775
AAGAGC	1.0709	1.1139	1.1002	0	0	0	1.1002	0.53545	0.55695	0.365433
CUGAAG	1.0734	1.1027	1.1086	0	0	0	1.1086	0.5367	0.55135	0.366108
CCCCAA	1.1141	1.0813	1.0893	0	0	0	1.0893	0.55705	0.54065	0.3645
CCCACG	1.1208	1.0503	1.1135	0	0	0	1.1135	0.5604	0.52515	0.366508
CUGAGC	1.1034	1.0859	1.0948	0	0	0	1.0948	0.5517	0.54295	0.364908
AGAAGU	1.0419	1.1454	1.0953	0	0	0	1.0953	0.52095	0.5727	0.364825
AAAUCC	1.0716	1.1204	1.0897	0	0	0	1.0897	0.5358	0.5602	0.364283
GCCCAC	1.1284	1.0524	1.1006	0	0	0	1.1006	0.5642	0.5262	0.365167
ACGCGA	1.0974	1.093	1.0909	0	0	0	1.0909	0.5487	0.5465	0.36435
UGGAAA	1.0628	1.0978	1.1202	0	0	0	1.1202	0.5314	0.5489	0.36675
GCGGGG	1.099	1.0586	1.1224	0	0	0	1.1224	0.5495	0.5293	0.366867
UAAUGA	1.0504	1.1995	1.03	0	0	0	1.03	0.5252	0.59975	0.359158
GGGAGG	1.0903	1.1014	1.0874	0	0	0	1.0874	0.54515	0.5507	0.363875
GGAAGG	1.0915	1.0688	1.1188	0	0	0	1.1188	0.54575	0.5344	0.366492
AAAUUC	1.039	1.1552	1.0848	0	0	0	1.0848	0.5195	0.5776	0.36365
CCGACG	1.1371	1.0437	1.0981	0	0	0	1.0981	0.56855	0.52185	0.36475
UUGUGA	1.0717	1.1493	1.0576	0	0	0	1.0576	0.53585	0.57465	0.36135
GCAGGG	1.1015	1.0589	1.1182	0	0	0	1.1182	0.55075	0.52945	0.3664
GCGAAG	1.0641	1.0932	1.1198	0	0	0	1.1198	0.53205	0.5466	0.366408
UCCAAA	1.0648	1.1165	1.0951	0	0	0	1.0951	0.5324	0.55825	0.364292
CCGGCA	1.1218	1.0604	1.0942	0	0	0	1.0942	0.5609	0.5302	0.364217
GGAAAC	1.078	1.085	1.1131	0	0	0	1.1131	0.539	0.5425	0.365767
CCUGGC	1.1306	1.0245	1.121	0	0	0	1.121	0.5653	0.51225	0.366425
AGCCCC	1.1182	1.0629	1.0948	0	0	0	1.0948	0.5591	0.53145	0.364225
GUAGAA	1.0597	1.1293	1.0867	0	0	0	1.0867	0.52985	0.56465	0.363533
UUUCCG	1.0976	1.0809	1.097	0	0	0	1.097	0.5488	0.54045	0.364375
CCUUGG	1.1276	1.0279	1.1191	0	0	0	1.1191	0.5638	0.51395	0.366142
GAAGCG	1.0871	1.0815	1.1057	0	0	0	1.1057	0.54355	0.54075	0.365
CAGACA	1.0903	1.091	1.0925	0	0	0	1.0925	0.54515	0.5455	0.363858
GAGAUC	1.0824	1.0851	1.1058	0	0	0	1.1058	0.5412	0.54255	0.364925
GCCAGG	1.1007	1.0612	1.1112	0	0	0	1.1112	0.55035	0.5306	0.365358
AGAGUU	1.0829	1.1201	1.0691	0	0	0	1.0691	0.54145	0.56005	0.361767
UGAGCA	1.0975	1.1165	1.0581	0	0	0	1.0581	0.54875	0.55825	0.36085
UUCCUG	1.1184	1.0578	1.0957	0	0	0	1.0957	0.5592	0.5289	0.363967
CUGAGU	1.0974	1.086	1.0883	0	0	0	1.0883	0.5487	0.543	0.363333
UCAGAG	1.0602	1.0894	1.1219	0	0	0	1.1219	0.5301	0.5447	0.366117
GAGCUG	1.1148	1.0831	1.0735	0	0	0	1.0735	0.5574	0.54155	0.362075
AGCUUG	1.0807	1.1039	1.0867	0	0	0	1.0867	0.54035	0.55195	0.363167
UGCGGG	1.1008	1.0543	1.1154	0	0	0	1.1154	0.5504	0.52715	0.365492
AGGAAU	1.0436	1.1218	1.105	0	0	0	1.105	0.5218	0.5609	0.364617
GAGUCC	1.131	1.0493	1.0898	0	0	0	1.0898	0.5655	0.52465	0.363325
UGAAGC	1.0829	1.097	1.0896	0	0	0	1.0896	0.54145	0.5485	0.363258
CCGAAU	1.1031	1.0826	1.0833	0	0	0	1.0833	0.55155	0.5413	0.362692
GCACGA	1.0822	1.0887	1.0978	0	0	0	1.0978	0.5411	0.54435	0.363875
GUGUGA	1.0667	1.1432	1.0583	0	0	0	1.0583	0.53335	0.5716	0.360542
AUGGGG	1.0864	1.0841	1.0977	0	0	0	1.0977	0.5432	0.54205	0.363825
GCAAAG	1.0418	1.1188	1.1075	0	0	0	1.1075	0.5209	0.5594	0.364633
AGGGAG	1.0935	1.1111	1.0634	0	0	0	1.0634	0.54675	0.55555	0.36095
AUCCGG	1.1219	1.0665	1.079	0	0	0	1.079	0.56095	0.53325	0.3622
GAGGCU	1.0879	1.0667	1.1123	0	0	0	1.1123	0.54395	0.53335	0.364933
AAGCGA	1.04	1.1324	1.0932	0	0	0	1.0932	0.52	0.5662	0.363233
AAUGAC	1.0765	1.1026	1.0862	0	0	0	1.0862	0.53825	0.5513	0.362625
AAAGGA	1.0354	1.1368	1.093	0	0	0	1.093	0.5177	0.5684	0.363183
UUGAAA	1.0299	1.1534	1.0818	0	0	0	1.0818	0.51495	0.5767	0.362242
GUUUUG	1.0792	1.1016	1.084	0	0	0	1.084	0.5396	0.5508	0.3624
AACAGA	1.0244	1.1466	1.0936	0	0	0	1.0936	0.5122	0.5733	0.363183
CGUUGA	1.0858	1.0953	1.0835	0	0	0	1.0835	0.5429	0.54765	0.362342
GGAGAC	1.1166	1.0643	1.0836	0	0	0	1.0836	0.5583	0.53215	0.362342
UUUCCA	1.0993	1.0743	1.0908	0	0	0	1.0908	0.54965	0.53715	0.362933
AGACUG	1.0681	1.1109	1.0848	0	0	0	1.0848	0.53405	0.55545	0.362383
CCGGCG	1.1075	1.0382	1.1177	0	0	0	1.1177	0.55375	0.5191	0.365092
GGCCCA	1.1142	1.0586	1.0903	0	0	0	1.0903	0.5571	0.5293	0.362783
GGGGGA	1.0629	1.0536	1.1466	0	0	0	1.1466	0.53145	0.5268	0.367475
AAGAUU	1.0344	1.1495	1.0792	0	0	0	1.0792	0.5172	0.57475	0.361858
CUGGAG	1.1067	1.0699	1.0864	0	0	0	1.0864	0.55335	0.53495	0.36245
ACCAUG	1.1039	1.1085	1.0505	0	0	0	1.0505	0.55195	0.55425	0.35945
GGAACA	1.0582	1.1057	1.0989	0	0	0	1.0989	0.5291	0.55285	0.363475
CCACUG	1.105	1.0819	1.0758	0	0	0	1.0758	0.5525	0.54095	0.361542
AAAAUC	0.9979	1.1653	1.0994	0	0	0	1.0994	0.49895	0.58265	0.3635
CGAAAU	1.0397	1.1366	1.0861	0	0	0	1.0861	0.51985	0.5683	0.362375
ACCGAA	1.0662	1.1064	1.0891	0	0	0	1.0891	0.5331	0.5532	0.362567
ACGGGA	1.1041	1.0572	1.1003	0	0	0	1.1003	0.55205	0.5286	0.363492
GCUGAG	1.091	1.0732	1.0972	0	0	0	1.0972	0.5455	0.5366	0.363217
CGAAGC	1.0845	1.0665	1.1102	0	0	0	1.1102	0.54225	0.53325	0.364283
UCCAAG	1.0845	1.0637	1.113	0	0	0	1.113	0.54225	0.53185	0.364517
GACGAA	1.0794	1.1085	1.073	0	0	0	1.073	0.5397	0.55425	0.361158
GGAACC	1.0899	1.0663	1.1045	0	0	0	1.1045	0.54495	0.53315	0.363767
UGCCCA	1.1209	1.0525	1.0868	0	0	0	1.0868	0.56045	0.52625	0.36225
AGACCA	1.0778	1.1052	1.0771	0	0	0	1.0771	0.5389	0.5526	0.361433
CCACCG	1.1055	1.0637	1.0904	0	0	0	1.0904	0.55275	0.53185	0.3625
UGAUCG	1.1016	1.0913	1.0666	0	0	0	1.0666	0.5508	0.54565	0.360508
CGCGGG	1.087	1.0544	1.118	0	0	0	1.118	0.5435	0.5272	0.364783
CCGCGG	1.1204	1.0275	1.1114	0	0	0	1.1114	0.5602	0.51375	0.364225
AAAGCA	1.0172	1.1444	1.0965	0	0	0	1.0965	0.5086	0.5722	0.362883
UGAAUU	1.0723	1.1148	1.071	0	0	0	1.071	0.53615	0.5574	0.360758
UGCAGA	1.1015	1.0937	1.0622	0	0	0	1.0622	0.55075	0.54685	0.359967
UUCCCG	1.1281	1.0453	1.0837	0	0	0	1.0837	0.56405	0.52265	0.361733
UGACCA	1.1041	1.0804	1.0725	0	0	0	1.0725	0.55205	0.5402	0.360792
UAGAAU	1.0577	1.1396	1.0592	0	0	0	1.0592	0.52885	0.5698	0.359642
CAAGAC	1.0655	1.1018	1.089	0	0	0	1.089	0.53275	0.5509	0.362108
CAGGCC	1.0986	1.0426	1.1151	0	0	0	1.1151	0.5493	0.5213	0.364283
GGUUUG	1.071	1.0534	1.1317	0	0	0	1.1317	0.5355	0.5267	0.36565
AGAACG	1.0545	1.1037	1.0977	0	0	0	1.0977	0.52725	0.55185	0.3628
CGCAUG	1.1104	1.0679	1.0774	0	0	0	1.0774	0.5552	0.53395	0.361092
AACCGG	1.0835	1.0654	1.1057	0	0	0	1.1057	0.54175	0.5327	0.363358
GGGAGC	1.0956	1.0664	1.0921	0	0	0	1.0921	0.5478	0.5332	0.362183
UCCCCC	1.1199	1.0277	1.1055	0	0	0	1.1055	0.55995	0.51385	0.363217
GGGGGU	1.1197	1.0406	1.0923	0	0	0	1.0923	0.55985	0.5203	0.362075
GGGUUC	1.111	1.0515	1.0896	0	0	0	1.0896	0.5555	0.52575	0.361808
CAGACC	1.0998	1.0638	1.088	0	0	0	1.088	0.5499	0.5319	0.361633
AUUCCU	1.103	1.0866	1.0618	0	0	0	1.0618	0.5515	0.5433	0.359433
GCAGAU	1.1057	1.0845	1.0609	0	0	0	1.0609	0.55285	0.54225	0.359333
UGAAAU	1.0257	1.155	1.07	0	0	0	1.07	0.51285	0.5775	0.360058
GACAAG	1.0415	1.1	1.1089	0	0	0	1.1089	0.52075	0.55	0.363275
UGCCAG	1.094	1.0631	1.0924	0	0	0	1.0924	0.547	0.53155	0.361825
GGCCGA	1.1052	1.0549	1.089	0	0	0	1.089	0.5526	0.52745	0.361508
CGCCGA	1.1032	1.0472	1.0987	0	0	0	1.0987	0.5516	0.5236	0.362317
GGCUUG	1.0828	1.0816	1.0843	0	0	0	1.0843	0.5414	0.5408	0.361083
CCUGCG	1.1043	1.0469	1.0973	0	0	0	1.0973	0.55215	0.52345	0.36215
UUUGGC	1.0995	1.0477	1.1005	0	0	0	1.1005	0.54975	0.52385	0.36235
GGAAGC	1.0543	1.0734	1.1197	0	0	0	1.1197	0.52715	0.5367	0.363925
UCAGAA	1.0308	1.1024	1.1138	0	0	0	1.1138	0.5154	0.5512	0.3634
UGGCAA	1.0889	1.082	1.0761	0	0	0	1.0761	0.54445	0.541	0.360258
AAACCA	1.0464	1.1198	1.0795	0	0	0	1.0795	0.5232	0.5599	0.360433
CGGGGC	1.09	1.025	1.1296	0	0	0	1.1296	0.545	0.5125	0.364517
GGAAAU	1.051	1.1001	1.0933	0	0	0	1.0933	0.5255	0.55005	0.361475
CGCCAG	1.1011	1.0495	1.0936	0	0	0	1.0936	0.55055	0.52475	0.361483
AAGGAA	1.0282	1.1383	1.0772	0	0	0	1.0772	0.5141	0.56915	0.360075
CAAAAC	1.0186	1.1258	1.0991	0	0	0	1.0991	0.5093	0.5629	0.361883
CGGUGA	1.0593	1.107	1.0765	0	0	0	1.0765	0.52965	0.5535	0.359942
CGAGUA	1.094	1.0864	1.0624	0	0	0	1.0624	0.547	0.5432	0.358767
GGGAGU	1.0963	1.0528	1.0935	0	0	0	1.0935	0.54815	0.5264	0.361342
ACCAAG	1.053	1.105	1.0842	0	0	0	1.0842	0.5265	0.5525	0.360533
GCCAAA	1.0613	1.0843	1.0962	0	0	0	1.0962	0.53065	0.54215	0.3615
AAAGCG	1.0281	1.1156	1.0972	0	0	0	1.0972	0.51405	0.5578	0.361508
CACGGG	1.0922	1.0545	1.0942	0	0	0	1.0942	0.5461	0.52725	0.361258
GCAGGC	1.0815	1.0627	1.0966	0	0	0	1.0966	0.54075	0.53135	0.36145
GUGCCC	1.0998	1.028	1.1127	0	0	0	1.1127	0.5499	0.514	0.362767
AGGCUG	1.0755	1.0597	1.1052	0	0	0	1.1052	0.53775	0.52985	0.362133
CGGCAC	1.1146	1.0424	1.0832	0	0	0	1.0832	0.5573	0.5212	0.360283
GGCCGG	1.0743	1.0291	1.1367	0	0	0	1.1367	0.53715	0.51455	0.364733
GACGAU	1.0816	1.0961	1.0621	0	0	0	1.0621	0.5408	0.54805	0.358492
UGAGUG	1.0683	1.1079	1.0634	0	0	0	1.0634	0.53415	0.55395	0.358583
GAAGGG	1.0738	1.0619	1.1039	0	0	0	1.1039	0.5369	0.53095	0.361958
AUGACU	1.0757	1.104	1.0596	0	0	0	1.0596	0.53785	0.552	0.358242
GGCGAA	1.0353	1.0966	1.1073	0	0	0	1.1073	0.51765	0.5483	0.362208
UGAGGC	1.0946	1.0809	1.0636	0	0	0	1.0636	0.5473	0.54045	0.358558
UGGGGA	1.0664	1.0415	1.1312	0	0	0	1.1312	0.5332	0.52075	0.364192
UUUGCC	1.139	1.047	1.053	0	0	0	1.053	0.5695	0.5235	0.357667
AAAGUG	1.0084	1.1426	1.0874	0	0	0	1.0874	0.5042	0.5713	0.360483
AACCCC	1.1102	1.049	1.0787	0	0	0	1.0787	0.5551	0.5245	0.359717
AGCCAG	1.0792	1.0738	1.0849	0	0	0	1.0849	0.5396	0.5369	0.360233
CGCGCC	1.1056	1.0284	1.1034	0	0	0	1.1034	0.5528	0.5142	0.361733
CCCUAG	1.1074	1.0433	1.0856	0	0	0	1.0856	0.5537	0.52165	0.360158
GACAAC	1.0669	1.0938	1.0752	0	0	0	1.0752	0.53345	0.5469	0.359258
GGCGAG	1.0962	1.066	1.0736	0	0	0	1.0736	0.5481	0.533	0.359117
GGCAAG	1.0765	1.0696	1.0889	0	0	0	1.0889	0.53825	0.5348	0.360325
AAACAG	1.0062	1.1351	1.0928	0	0	0	1.0928	0.5031	0.56755	0.360575
AGACAA	1.0259	1.1261	1.0821	0	0	0	1.0821	0.51295	0.56305	0.359683
UGGCUG	1.109	1.0565	1.0686	0	0	0	1.0686	0.5545	0.52825	0.358558
ACAAGA	1.0111	1.1501	1.0726	0	0	0	1.0726	0.50555	0.57505	0.358867
GACAAA	1.0288	1.123	1.0818	0	0	0	1.0818	0.5144	0.5615	0.359617
CCUAGG	1.0854	1.0653	1.0821	0	0	0	1.0821	0.5427	0.53265	0.359575
GGAGGG	1.0784	1.0606	1.0937	0	0	0	1.0937	0.5392	0.5303	0.360533
CCAAGC	1.0868	1.0557	1.0898	0	0	0	1.0898	0.5434	0.52785	0.360175
AAGGCC	1.0794	1.0566	1.0962	0	0	0	1.0962	0.5397	0.5283	0.3607
CCGGUG	1.0868	1.0432	1.102	0	0	0	1.102	0.5434	0.5216	0.361167
GAUACU	1.0807	1.109	1.0421	0	0	0	1.0421	0.54035	0.5545	0.356158
CCGAAC	1.0907	1.0585	1.082	0	0	0	1.082	0.54535	0.52925	0.359433
GGGGAU	1.0703	1.0625	1.0971	0	0	0	1.0971	0.53515	0.53125	0.360583
CAACCG	1.0812	1.0604	1.0882	0	0	0	1.0882	0.5406	0.5302	0.359833
CUCCGG	1.0998	1.0178	1.1119	0	0	0	1.1119	0.5499	0.5089	0.361783
AAGGGA	1.0482	1.0927	1.0879	0	0	0	1.0879	0.5241	0.54635	0.359725
GAAGGA	1.0597	1.0999	1.0692	0	0	0	1.0692	0.52985	0.54995	0.358167
AGAUGU	1.0552	1.1251	1.0485	0	0	0	1.0485	0.5276	0.56255	0.356442
GCUAUG	1.1172	1.1049	1.0064	0	0	0	1.0064	0.5586	0.55245	0.352908
GCUUUG	1.0811	1.0777	1.0697	0	0	0	1.0697	0.54055	0.53885	0.358183
ACAGAG	1.044	1.0955	1.0889	0	0	0	1.0889	0.522	0.54775	0.359775
AGAGUG	1.0928	1.0858	1.0495	0	0	0	1.0495	0.5464	0.5429	0.356467
CAAACC	1.0803	1.069	1.0788	0	0	0	1.0788	0.54015	0.5345	0.358908
CAAGCC	1.087	1.0547	1.0859	0	0	0	1.0859	0.5435	0.52735	0.359458
CUGGCA	1.1055	1.0349	1.0861	0	0	0	1.0861	0.55275	0.51745	0.359383
ACGAAA	1.0245	1.1271	1.0744	0	0	0	1.0744	0.51225	0.56355	0.358367
CGACGC	1.1191	1.0256	1.081	0	0	0	1.081	0.55955	0.5128	0.358892
UGGCAU	1.0938	1.0716	1.0601	0	0	0	1.0601	0.5469	0.5358	0.357133
AACGCC	1.1078	1.0445	1.0721	0	0	0	1.0721	0.5539	0.52225	0.358042
GAAUGC	1.0797	1.0667	1.0776	0	0	0	1.0776	0.53985	0.53335	0.358467
CAAGAU	1.0523	1.1205	1.0506	0	0	0	1.0506	0.52615	0.56025	0.356167
AGGAGG	1.0613	1.0563	1.1058	0	0	0	1.1058	0.53065	0.52815	0.360767
GGAGCA	1.0735	1.0517	1.0982	0	0	0	1.0982	0.53675	0.52585	0.360133
UCGCCC	1.0994	1.023	1.1008	0	0	0	1.1008	0.5497	0.5115	0.360333
CAGCUG	1.0884	1.0442	1.0892	0	0	0	1.0892	0.5442	0.5221	0.35925
GUGAAA	1.0128	1.1213	1.0875	0	0	0	1.0875	0.5064	0.56065	0.359092
AAUUUC	1.057	1.1127	1.0519	0	0	0	1.0519	0.5285	0.55635	0.356125
GUGAUC	1.0579	1.1008	1.0627	0	0	0	1.0627	0.52895	0.5504	0.357008
AGGCAG	1.0531	1.0615	1.1068	0	0	0	1.1068	0.52655	0.53075	0.360683
AGAUCC	1.0758	1.059	1.0865	0	0	0	1.0865	0.5379	0.5295	0.358983
CAGACG	1.0817	1.0459	1.0937	0	0	0	1.0937	0.54085	0.52295	0.359583
GGCAAA	1.0343	1.1004	1.0864	0	0	0	1.0864	0.51715	0.5502	0.358958
AGGAAC	1.0489	1.0972	1.0743	0	0	0	1.0743	0.52445	0.5486	0.357892
UUCCGC	1.1076	1.0064	1.1058	0	0	0	1.1058	0.5538	0.5032	0.360467
GGGGCC	1.0921	1.0189	1.1087	0	0	0	1.1087	0.54605	0.50945	0.3607
AAAUUU	1.0033	1.1482	1.0679	0	0	0	1.0679	0.50165	0.5741	0.357275
GAACAA	1.0019	1.1343	1.0826	0	0	0	1.0826	0.50095	0.56715	0.35845
GGGACC	1.1	1.0497	1.0691	0	0	0	1.0691	0.55	0.52485	0.357325
GACAGG	1.051	1.0526	1.115	0	0	0	1.115	0.5255	0.5263	0.361133
AGCGCC	1.0998	1.0542	1.0645	0	0	0	1.0645	0.5499	0.5271	0.356917
AUCCGC	1.0995	1.0481	1.0705	0	0	0	1.0705	0.54975	0.52405	0.357383
GGAUUC	1.078	1.0594	1.0798	0	0	0	1.0798	0.539	0.5297	0.358083
CGAGGU	1.0862	1.0793	1.0513	0	0	0	1.0513	0.5431	0.53965	0.355675
AAGGCA	1.0533	1.0839	1.0789	0	0	0	1.0789	0.52665	0.54195	0.357917
CCAGCA	1.0996	1.0453	1.0712	0	0	0	1.0712	0.5498	0.52265	0.357275
CACGCC	1.1185	1.0287	1.0687	0	0	0	1.0687	0.55925	0.51435	0.35705
GCAGCC	1.091	1.0245	1.1	0	0	0	1.1	0.5455	0.51225	0.359625
CCGCUG	1.0893	1.049	1.077	0	0	0	1.077	0.54465	0.5245	0.357692
GGAGGA	1.0549	1.0485	1.1119	0	0	0	1.1119	0.52745	0.52425	0.3606
GGCACU	1.1134	1.0283	1.0728	0	0	0	1.0728	0.5567	0.51415	0.357275
AAACGG	1.0563	1.074	1.0835	0	0	0	1.0835	0.52815	0.537	0.358108
GCGACA	1.0835	1.0532	1.0771	0	0	0	1.0771	0.54175	0.5266	0.357575
GAGUUG	1.0718	1.0679	1.074	0	0	0	1.074	0.5359	0.53395	0.357308
CCCCCU	1.1225	0.9988	1.0922	0	0	0	1.0922	0.56125	0.4994	0.358808
CUCGAA	1.0542	1.0639	1.0948	0	0	0	1.0948	0.5271	0.53195	0.358975
GCCAUG	1.09	1.0573	1.0651	0	0	0	1.0651	0.545	0.52865	0.356458
GAGCAU	1.0806	1.0853	1.0463	0	0	0	1.0463	0.5403	0.54265	0.354875
CGGCAG	1.0894	1.0265	1.096	0	0	0	1.096	0.5447	0.51325	0.358992
UCCGCG	1.0856	1.0364	1.0897	0	0	0	1.0897	0.5428	0.5182	0.35845
UCCAUG	1.0987	1.0607	1.0522	0	0	0	1.0522	0.54935	0.53035	0.355317
CUGACC	1.086	1.0345	1.0908	0	0	0	1.0908	0.543	0.51725	0.358508
AUGCGA	1.0765	1.0913	1.0434	0	0	0	1.0434	0.53825	0.54565	0.35455
UUUCGA	1.0464	1.0674	1.0973	0	0	0	1.0973	0.5232	0.5337	0.359033
GGCAUC	1.1228	1.0158	1.0723	0	0	0	1.0723	0.5614	0.5079	0.356933
CAUGAG	1.0647	1.0742	1.0717	0	0	0	1.0717	0.53235	0.5371	0.356858
CCACCU	1.1181	1.0316	1.0609	0	0	0	1.0609	0.55905	0.5158	0.355958
CGAACC	1.0791	1.0582	1.0731	0	0	0	1.0731	0.53955	0.5291	0.356958
ACACUG	1.057	1.0793	1.074	0	0	0	1.074	0.5285	0.53965	0.357025
UCGGGA	1.0951	1.037	1.0779	0	0	0	1.0779	0.54755	0.5185	0.357325
GGGCAG	1.0673	1.0661	1.0764	0	0	0	1.0764	0.53365	0.53305	0.357183
UUGGCG	1.0872	1.015	1.1076	0	0	0	1.1076	0.5436	0.5075	0.359783
GGGACA	1.0541	1.0666	1.0882	0	0	0	1.0882	0.52705	0.5333	0.358092
GCCAGC	1.0742	1.039	1.0957	0	0	0	1.0957	0.5371	0.5195	0.358717
AGCAAA	1.006	1.1291	1.0735	0	0	0	1.0735	0.503	0.56455	0.356842
GAGCCU	1.088	1.0483	1.0721	0	0	0	1.0721	0.544	0.52415	0.356708
CUUGCC	1.1269	1.0179	1.0627	0	0	0	1.0627	0.56345	0.50895	0.35585
GAGGGC	1.085	1.0277	1.0944	0	0	0	1.0944	0.5425	0.51385	0.358458
GUGAGA	1.0238	1.0815	1.1012	0	0	0	1.1012	0.5119	0.54075	0.358975
UCCAGC	1.0956	1.0455	1.0654	0	0	0	1.0654	0.5478	0.52275	0.355992
AUGGAG	1.0676	1.0905	1.0482	0	0	0	1.0482	0.5338	0.54525	0.354542
CGCUUG	1.0982	1.0531	1.055	0	0	0	1.055	0.5491	0.52655	0.355108
AUUGAG	1.0741	1.0951	1.0364	0	0	0	1.0364	0.53705	0.54755	0.3535
CACCAA	1.0724	1.066	1.0666	0	0	0	1.0666	0.5362	0.533	0.355967
GCGCAG	1.0658	1.0503	1.0887	0	0	0	1.0887	0.5329	0.52515	0.357792
AGACAU	1.045	1.1131	1.0462	0	0	0	1.0462	0.5225	0.55655	0.354208
CGAUUA	1.0492	1.1119	1.041	0	0	0	1.041	0.5246	0.55595	0.353592
GGGGUU	1.0576	1.0298	1.1147	0	0	0	1.1147	0.5288	0.5149	0.359733
UGCUUG	1.1012	1.0486	1.0522	0	0	0	1.0522	0.5506	0.5243	0.354517
AAGACG	1.0404	1.0893	1.0719	0	0	0	1.0719	0.5202	0.54465	0.356125
GAGUAG	1.0421	1.0764	1.0827	0	0	0	1.0827	0.52105	0.5382	0.356992
AAGGGG	1.045	1.0498	1.1064	0	0	0	1.1064	0.5225	0.5249	0.358967
AUUGCU	1.1029	1.074	1.0242	0	0	0	1.0242	0.55145	0.537	0.352108
CCGCGC	1.0909	1.0162	1.0937	0	0	0	1.0937	0.54545	0.5081	0.357875
UUGGCC	1.0927	1.015	1.093	0	0	0	1.093	0.54635	0.5075	0.357808
GGCAGC	1.0796	1.0495	1.0705	0	0	0	1.0705	0.5398	0.52475	0.355842
UGGCGG	1.0637	1.0098	1.1259	0	0	0	1.1259	0.53185	0.5049	0.360442
AAGCCA	1.063	1.0775	1.0588	0	0	0	1.0588	0.5315	0.53875	0.354842
ACCUGC	1.0912	1.0346	1.0734	0	0	0	1.0734	0.5456	0.5173	0.35605
AAACGC	1.0521	1.0787	1.0682	0	0	0	1.0682	0.52605	0.53935	0.3556
CCAACC	1.0912	1.0317	1.0759	0	0	0	1.0759	0.5456	0.51585	0.356225
UAUUGA	1.0687	1.1448	0.9852	0	0	0	0.9852	0.53435	0.5724	0.348658
CAGGCA	1.0723	1.0551	1.0712	0	0	0	1.0712	0.53615	0.52755	0.355817
UCCCAG	1.0965	1.0432	1.0582	0	0	0	1.0582	0.54825	0.5216	0.354675
GGCACG	1.0772	1.0445	1.0761	0	0	0	1.0761	0.5386	0.52225	0.356158
CAACGA	1.0582	1.0851	1.0544	0	0	0	1.0544	0.5291	0.54255	0.354342
CCGAUA	1.0739	1.069	1.0548	0	0	0	1.0548	0.53695	0.5345	0.354375
CGGGAC	1.1163	1.0224	1.0585	0	0	0	1.0585	0.55815	0.5112	0.354642
CGAUAG	1.0634	1.0916	1.0419	0	0	0	1.0419	0.5317	0.5458	0.353233
UGAAGG	1.0469	1.0773	1.0725	0	0	0	1.0725	0.52345	0.53865	0.355767
GCACUC	1.069	1.0365	1.0911	0	0	0	1.0911	0.5345	0.51825	0.357308
GCCAAG	1.0739	1.0664	1.0558	0	0	0	1.0558	0.53695	0.5332	0.354325
CUGGAA	1.0833	1.053	1.0598	0	0	0	1.0598	0.54165	0.5265	0.354658
GGGGUG	1.1021	1.0206	1.0727	0	0	0	1.0727	0.55105	0.5103	0.355675
CCAGGU	1.0629	1.0374	1.0946	0	0	0	1.0946	0.53145	0.5187	0.357458
AAUCCG	1.0781	1.059	1.0577	0	0	0	1.0577	0.53905	0.5295	0.354375
AGCAGG	1.0214	1.0508	1.1223	0	0	0	1.1223	0.5107	0.5254	0.359733
ACCUAG	1.0906	1.0518	1.052	0	0	0	1.052	0.5453	0.5259	0.353867
AAAAGU	0.9557	1.1405	1.0981	0	0	0	1.0981	0.47785	0.57025	0.3577
AAUGAG	1.0206	1.1004	1.0728	0	0	0	1.0728	0.5103	0.5502	0.35555
UGAGGG	1.0542	1.0726	1.0668	0	0	0	1.0668	0.5271	0.5363	0.355033
ACCAGC	1.0936	1.0397	1.06	0	0	0	1.06	0.5468	0.51985	0.354442
AUGGGU	1.0407	1.0887	1.0627	0	0	0	1.0627	0.52035	0.54435	0.354567
UGGAGG	1.0603	1.0156	1.1156	0	0	0	1.1156	0.53015	0.5078	0.358925
GUGACA	1.0469	1.075	1.0694	0	0	0	1.0694	0.52345	0.5375	0.355058
CUUUUG	1.1078	1.0599	1.0236	0	0	0	1.0236	0.5539	0.52995	0.351242
CGAGCG	1.0746	1.0346	1.0816	0	0	0	1.0816	0.5373	0.5173	0.356033
CAGGCG	1.0536	1.0345	1.1025	0	0	0	1.1025	0.5268	0.51725	0.357758
CAUCCA	1.0865	1.0432	1.0608	0	0	0	1.0608	0.54325	0.5216	0.354275
GGUAGG	1.0285	1.0388	1.1227	0	0	0	1.1227	0.51425	0.5194	0.359392
GGGCAC	1.0872	1.0305	1.072	0	0	0	1.072	0.5436	0.51525	0.355142
AGAACU	1.0336	1.094	1.062	0	0	0	1.062	0.5168	0.547	0.3543
CGAGUC	1.0867	1.0405	1.062	0	0	0	1.062	0.54335	0.52025	0.354267
CGCAGG	1.0625	1.0333	1.0932	0	0	0	1.0932	0.53125	0.51665	0.35685
GGGAUU	1.0675	1.048	1.0732	0	0	0	1.0732	0.53375	0.524	0.355158
CUGGCC	1.0745	1.0151	1.099	0	0	0	1.099	0.53725	0.50755	0.3573
AGGGCA	1.0561	1.0559	1.0761	0	0	0	1.0761	0.52805	0.52795	0.35535
GAAAGU	1.001	1.1138	1.0731	0	0	0	1.0731	0.5005	0.5569	0.355083
CUGGCG	1.083	1.0202	1.0846	0	0	0	1.0846	0.5415	0.5101	0.356033
GGACCC	1.0783	1.0153	1.0939	0	0	0	1.0939	0.53915	0.50765	0.356783
UCGAAA	1.0136	1.0857	1.0876	0	0	0	1.0876	0.5068	0.54285	0.356208
AAGGAG	1.024	1.084	1.0788	0	0	0	1.0788	0.512	0.542	0.355467
CCUGCC	1.1229	1.0027	1.0609	0	0	0	1.0609	0.56145	0.50135	0.35395
GGCGGG	1.0758	0.9904	1.1199	0	0	0	1.1199	0.5379	0.4952	0.358833
GAAACU	1.0331	1.095	1.0575	0	0	0	1.0575	0.51655	0.5475	0.353592
CAAAGC	1.0234	1.0877	1.0743	0	0	0	1.0743	0.5117	0.54385	0.354975
GAGGGU	1.0415	1.0501	1.0938	0	0	0	1.0938	0.52075	0.52505	0.3566
GGAGAU	1.0771	1.038	1.0699	0	0	0	1.0699	0.53855	0.519	0.354575
CCCAGU	1.0926	1.028	1.0642	0	0	0	1.0642	0.5463	0.514	0.354083
CAACUG	1.0566	1.0807	1.0469	0	0	0	1.0469	0.5283	0.54035	0.352592
CCUUUG	1.0826	1.0449	1.0561	0	0	0	1.0561	0.5413	0.52245	0.353308
AGGGGC	1.0479	1.0236	1.112	0	0	0	1.112	0.52395	0.5118	0.357958
GGAGGC	1.074	1.0069	1.1026	0	0	0	1.1026	0.537	0.50345	0.357175
GCCUGC	1.1154	1.0044	1.0634	0	0	0	1.0634	0.5577	0.5022	0.353883
ACAGCC	1.0902	1.025	1.0673	0	0	0	1.0673	0.5451	0.5125	0.35415
GAAUGG	1.0492	1.062	1.0709	0	0	0	1.0709	0.5246	0.531	0.354417
GGAGUG	1.0839	1.0433	1.0542	0	0	0	1.0542	0.54195	0.52165	0.352967
GCGACC	1.0749	1.0188	1.0872	0	0	0	1.0872	0.53745	0.5094	0.355675
GCAUUG	1.0827	1.0617	1.0363	0	0	0	1.0363	0.54135	0.53085	0.351417
CGUAGA	1.0437	1.0711	1.0657	0	0	0	1.0657	0.52185	0.53555	0.35385
UGGAAG	1.0366	1.0602	1.0832	0	0	0	1.0832	0.5183	0.5301	0.355267
CCCAAC	1.0872	1.0311	1.0613	0	0	0	1.0613	0.5436	0.51555	0.353408
AUGGAA	1.0375	1.0863	1.0554	0	0	0	1.0554	0.51875	0.54315	0.352883
AUGCGC	1.067	1.072	1.0399	0	0	0	1.0399	0.5335	0.536	0.351567
UCCGGC	1.0849	1.027	1.0665	0	0	0	1.0665	0.54245	0.5135	0.353742
GACCAA	1.0355	1.0779	1.0649	0	0	0	1.0649	0.51775	0.53895	0.3536
GCCGGG	1.0969	0.978	1.103	0	0	0	1.103	0.54845	0.489	0.356742
UGGCCA	1.0626	1.0475	1.0676	0	0	0	1.0676	0.5313	0.52375	0.353775
UGCGAA	1.0307	1.0746	1.0723	0	0	0	1.0723	0.51535	0.5373	0.354158
UUGACU	1.0679	1.06	1.049	0	0	0	1.049	0.53395	0.53	0.352158
UUUUGG	1.0786	1.0455	1.0527	0	0	0	1.0527	0.5393	0.52275	0.352458
GUCCGA	1.0728	1.0061	1.0976	0	0	0	1.0976	0.5364	0.50305	0.356175
UUCAGA	1.0131	1.0835	1.0793	0	0	0	1.0793	0.50655	0.54175	0.3546
AAUGCC	1.0596	1.0611	1.055	0	0	0	1.055	0.5298	0.53055	0.352558
UGACCU	1.0704	1.0445	1.0606	0	0	0	1.0606	0.5352	0.52225	0.353008
AUUGGG	1.0959	1.0367	1.0429	0	0	0	1.0429	0.54795	0.51835	0.351533
GGUAGA	1.0287	1.0969	1.0496	0	0	0	1.0496	0.51435	0.54845	0.352067
GUUCUG	1.0773	1.0363	1.0614	0	0	0	1.0614	0.53865	0.51815	0.353033
GCGGCA	1.06	1.0296	1.0842	0	0	0	1.0842	0.53	0.5148	0.354833
UUGAGG	1.0519	1.0543	1.0674	0	0	0	1.0674	0.52595	0.52715	0.353417
CAAGGG	1.0395	1.0436	1.0905	0	0	0	1.0905	0.51975	0.5218	0.355342
CGCUCG	1.0666	1.0229	1.0841	0	0	0	1.0841	0.5333	0.51145	0.354808
AAAACU	0.9857	1.1368	1.0506	0	0	0	1.0506	0.49285	0.5684	0.351975
CGGCUG	1.0905	1.0209	1.0614	0	0	0	1.0614	0.54525	0.51045	0.35285
UUUGCG	1.0502	1.0779	1.0446	0	0	0	1.0446	0.5251	0.53895	0.351442
GGACUG	1.0508	1.066	1.0557	0	0	0	1.0557	0.5254	0.533	0.35235
CUCCAG	1.0665	1.0237	1.0815	0	0	0	1.0815	0.53325	0.51185	0.354433
GCGAGC	1.048	1.0386	1.0848	0	0	0	1.0848	0.524	0.5193	0.354683
GGAAUC	1.0433	1.0588	1.0688	0	0	0	1.0688	0.52165	0.5294	0.353308
GGCGUG	1.0493	1.0587	1.0628	0	0	0	1.0628	0.52465	0.52935	0.3528
ACACUC	1.0849	1.0446	1.0412	0	0	0	1.0412	0.54245	0.5223	0.350992
CUGACG	1.0739	1.0127	1.084	0	0	0	1.084	0.53695	0.50635	0.35455
GACCAC	1.0836	1.055	1.0316	0	0	0	1.0316	0.5418	0.5275	0.35015
AGAUAC	1.0463	1.0856	1.0381	0	0	0	1.0381	0.52315	0.5428	0.350675
CGGGGU	1.0565	1.045	1.0673	0	0	0	1.0673	0.52825	0.5225	0.353008
ACCACG	1.0737	1.0461	1.0486	0	0	0	1.0486	0.53685	0.52305	0.351417
CAGCAC	1.0783	1.0337	1.0562	0	0	0	1.0562	0.53915	0.51685	0.352033
GACGAC	1.0694	1.0465	1.0521	0	0	0	1.0521	0.5347	0.52325	0.351675
CAAGGA	1.0138	1.0742	1.0795	0	0	0	1.0795	0.5069	0.5371	0.353917
CGACAG	1.0471	1.0275	1.0923	0	0	0	1.0923	0.52355	0.51375	0.354933
UUUUUC	1.0319	1.0456	1.0892	0	0	0	1.0892	0.51595	0.5228	0.354658
CGGAAG	1.0553	1.0322	1.079	0	0	0	1.079	0.52765	0.5161	0.353792
AAAUGG	1.0058	1.097	1.0631	0	0	0	1.0631	0.5029	0.5485	0.352417
CGGGUG	1.0523	0.999	1.1145	0	0	0	1.1145	0.52615	0.4995	0.356692
CCCUCC	1.1081	0.9839	1.0736	0	0	0	1.0736	0.55405	0.49195	0.353267
GCCGAA	1.041	1.0528	1.0717	0	0	0	1.0717	0.5205	0.5264	0.3531
GGUGCC	1.0814	0.9928	1.0912	0	0	0	1.0912	0.5407	0.4964	0.354717
CCAAAC	1.0549	1.0467	1.0632	0	0	0	1.0632	0.52745	0.52335	0.352333
CUGCCC	1.1173	0.9911	1.0562	0	0	0	1.0562	0.55865	0.49555	0.351733
AGGAUU	1.0408	1.0648	1.0588	0	0	0	1.0588	0.5204	0.5324	0.351933
UAAAAA	0.9507	1.1674	1.046	0	0	0	1.046	0.47535	0.5837	0.350842
AGUUUG	1.0497	1.0702	1.0441	0	0	0	1.0441	0.52485	0.5351	0.350675
UGCAUG	1.0614	1.0657	1.0366	0	0	0	1.0366	0.5307	0.53285	0.350025
GAGGUA	1.0385	1.0647	1.0602	0	0	0	1.0602	0.51925	0.53235	0.351967
CACGAA	1.0156	1.0752	1.0723	0	0	0	1.0723	0.5078	0.5376	0.35295
UGAACA	1.0029	1.0983	1.0617	0	0	0	1.0617	0.50145	0.54915	0.35205
ACCGGA	1.0706	1.0283	1.0638	0	0	0	1.0638	0.5353	0.51415	0.352208
UGCCGA	1.0732	1.0257	1.0637	0	0	0	1.0637	0.5366	0.51285	0.352192
AUCUUG	1.0561	1.0768	1.0296	0	0	0	1.0296	0.52805	0.5384	0.349342
AGGAGC	1.052	1.0335	1.077	0	0	0	1.077	0.526	0.51675	0.353292
GCUGAC	1.0651	1.0235	1.0736	0	0	0	1.0736	0.53255	0.51175	0.352983
CCGUAG	1.06	1.0281	1.0739	0	0	0	1.0739	0.53	0.51405	0.352992
ACAGAU	1.0435	1.0857	1.0326	0	0	0	1.0326	0.52175	0.54285	0.349533
ACCAAA	1.0183	1.0904	1.0531	0	0	0	1.0531	0.50915	0.5452	0.351242
AGGCGC	1.0843	1.013	1.0639	0	0	0	1.0639	0.54215	0.5065	0.352092
GAGGCG	1.0491	1.0469	1.065	0	0	0	1.065	0.52455	0.52345	0.352167
GGAGCC	1.0676	1.0418	1.0516	0	0	0	1.0516	0.5338	0.5209	0.35105
UCCGGA	1.0631	1.0178	1.0801	0	0	0	1.0801	0.53155	0.5089	0.353425
AGCCAC	1.0796	1.0315	1.0498	0	0	0	1.0498	0.5398	0.51575	0.350892
CAGAGU	1.0456	1.0669	1.048	0	0	0	1.048	0.5228	0.53345	0.350708
ACGAGC	1.0556	1.0617	1.043	0	0	0	1.043	0.5278	0.53085	0.350275
CUCAGG	1.0292	1.039	1.0912	0	0	0	1.0912	0.5146	0.5195	0.354217
UGGGGG	1.0837	1.0013	1.0744	0	0	0	1.0744	0.54185	0.50065	0.352817
GCAGGA	1.0521	1.0459	1.0611	0	0	0	1.0611	0.52605	0.52295	0.351683
AUGCCG	1.0693	1.0245	1.0649	0	0	0	1.0649	0.53465	0.51225	0.351967
AAGCCU	1.0337	1.0591	1.0656	0	0	0	1.0656	0.51685	0.52955	0.352
AGAGCU	1.0584	1.0458	1.054	0	0	0	1.054	0.5292	0.5229	0.351017
AAGCUG	1.0348	1.0574	1.0659	0	0	0	1.0659	0.5174	0.5287	0.352
CAAAGG	1.0127	1.0482	1.0972	0	0	0	1.0972	0.50635	0.5241	0.354608
AUGCCA	1.0703	1.0458	1.042	0	0	0	1.042	0.53515	0.5229	0.350008
ACCGAC	1.0659	1.0373	1.0549	0	0	0	1.0549	0.53295	0.51865	0.351083
CUCGAC	1.0799	1.0326	1.0454	0	0	0	1.0454	0.53995	0.5163	0.350275
UCGAGG	1.0586	1.0458	1.0527	0	0	0	1.0527	0.5293	0.5229	0.350817
UGCAGG	1.08	1.0448	1.0319	0	0	0	1.0319	0.54	0.5224	0.34905
ACAGGG	1.0446	1.034	1.0777	0	0	0	1.0777	0.5223	0.517	0.352833
CGCAAA	1.02	1.0767	1.0589	0	0	0	1.0589	0.51	0.53835	0.351208
AUGCUG	1.0537	1.0831	1.0186	0	0	0	1.0186	0.52685	0.54155	0.347833
CACCAC	1.0871	1.0181	1.0501	0	0	0	1.0501	0.54355	0.50905	0.35045
AUGCAC	1.0771	1.039	1.0392	0	0	0	1.0392	0.53855	0.5195	0.349542
GGUACC	1.0716	1.0047	1.0788	0	0	0	1.0788	0.5358	0.50235	0.352825
GCAAGG	1.0169	1.0479	1.0901	0	0	0	1.0901	0.50845	0.52395	0.35375
UCCGCC	1.0912	0.9916	1.0721	0	0	0	1.0721	0.5456	0.4958	0.35225
GCCGCC	1.0881	1.0051	1.0616	0	0	0	1.0616	0.54405	0.50255	0.351367
AGCGAA	1.0039	1.0835	1.067	0	0	0	1.067	0.50195	0.54175	0.351783
UGGGGU	1.036	1.0139	1.1044	0	0	0	1.1044	0.518	0.50695	0.354892
CGAUCC	1.0831	1.0148	1.0563	0	0	0	1.0563	0.54155	0.5074	0.350875
GAGCCG	1.0685	1.009	1.076	0	0	0	1.076	0.53425	0.5045	0.352458
UGAGCG	1.0517	1.0446	1.0562	0	0	0	1.0562	0.52585	0.5223	0.350725
GGACAC	1.074	1.0335	1.045	0	0	0	1.045	0.537	0.51675	0.349792
GAGGAC	1.0679	1.0231	1.061	0	0	0	1.061	0.53395	0.51155	0.351083
UGAAUC	1.0281	1.0704	1.053	0	0	0	1.053	0.51405	0.5352	0.350375
AGACCG	1.054	1.0233	1.0741	0	0	0	1.0741	0.527	0.51165	0.352125
GCGCGC	1.0658	1.0232	1.0619	0	0	0	1.0619	0.5329	0.5116	0.351067
CAGGGU	1.0322	1.0217	1.0967	0	0	0	1.0967	0.5161	0.51085	0.353942
CACCGC	1.0795	1.0072	1.0633	0	0	0	1.0633	0.53975	0.5036	0.351108
GCGAGU	1.0573	1.0653	1.0272	0	0	0	1.0272	0.52865	0.53265	0.348083
GUACCC	1.0801	1.0082	1.0613	0	0	0	1.0613	0.54005	0.5041	0.350908
AUUCAC	1.0733	1.0563	1.0191	0	0	0	1.0191	0.53665	0.52815	0.347317
CCAACG	1.0637	1.0178	1.0667	0	0	0	1.0667	0.53185	0.5089	0.351242
GGGGAC	1.0406	1.02	1.0872	0	0	0	1.0872	0.5203	0.51	0.352917
CCAUGG	1.0663	1.0145	1.0664	0	0	0	1.0664	0.53315	0.50725	0.351133
UCGAGU	1.0367	1.0399	1.0705	0	0	0	1.0705	0.51835	0.51995	0.351467
GCGCCA	1.0597	1.0067	1.0806	0	0	0	1.0806	0.52985	0.50335	0.3523
AGGCGA	1.0178	1.0721	1.057	0	0	0	1.057	0.5089	0.53605	0.350325
CCACAG	1.0703	1.0289	1.0465	0	0	0	1.0465	0.53515	0.51445	0.34935
GAGCGC	1.0547	1.0286	1.0623	0	0	0	1.0623	0.52735	0.5143	0.350658
GGCUGG	1.0632	1.0046	1.0778	0	0	0	1.0778	0.5316	0.5023	0.35195
CGCAAG	1.0452	1.0322	1.0681	0	0	0	1.0681	0.5226	0.5161	0.351133
UCCGAC	1.0795	1.0128	1.0532	0	0	0	1.0532	0.53975	0.5064	0.349892
CCUCCG	1.0701	1.0054	1.07	0	0	0	1.07	0.53505	0.5027	0.351292
GCCGCG	1.0712	0.9979	1.0764	0	0	0	1.0764	0.5356	0.49895	0.351825
CUGCUG	1.061	1.0289	1.0555	0	0	0	1.0555	0.5305	0.51445	0.350075
CACGCG	1.0581	1.0172	1.0701	0	0	0	1.0701	0.52905	0.5086	0.351292
GCCACG	1.0657	1.0142	1.0646	0	0	0	1.0646	0.53285	0.5071	0.350758
AAUUCU	1.0119	1.0711	1.0613	0	0	0	1.0613	0.50595	0.53555	0.350467
GAGUGC	1.0946	1.0115	1.0378	0	0	0	1.0378	0.5473	0.50575	0.348475
ACCCAU	1.0989	1.0227	1.0222	0	0	0	1.0222	0.54945	0.51135	0.347167
CCCCAC	1.0813	0.9901	1.0724	0	0	0	1.0724	0.54065	0.49505	0.35135
UCAAGA	0.9959	1.0867	1.0609	0	0	0	1.0609	0.49795	0.54335	0.350367
GGUAUG	1.051	1.0701	1.0224	0	0	0	1.0224	0.5255	0.53505	0.347158
UGGGAU	1.0426	1.0497	1.0511	0	0	0	1.0511	0.5213	0.52485	0.349542
UAUGGC	1.0937	1.062	0.9875	0	0	0	0.9875	0.54685	0.531	0.344225
UUGAGC	1.0641	1.0427	1.0364	0	0	0	1.0364	0.53205	0.52135	0.3483
AGUAGA	1.0093	1.0803	1.0533	0	0	0	1.0533	0.50465	0.54015	0.349683
UUGCGG	1.0627	1.034	1.0462	0	0	0	1.0462	0.53135	0.517	0.349092
GGCGCG	1.0515	1.0252	1.066	0	0	0	1.066	0.52575	0.5126	0.350725
CCGGCU	1.0804	1.0098	1.0524	0	0	0	1.0524	0.5402	0.5049	0.349583
CUCCCC	1.0828	1.0061	1.0531	0	0	0	1.0531	0.5414	0.50305	0.349592
GCAGCG	1.0685	1.0216	1.0518	0	0	0	1.0518	0.53425	0.5108	0.349475
GUCACC	1.061	1.0145	1.066	0	0	0	1.066	0.5305	0.50725	0.350625
UAGACA	1.0304	1.0721	1.0389	0	0	0	1.0389	0.5152	0.53605	0.348358
CAAACG	1.0304	1.0595	1.0513	0	0	0	1.0513	0.5152	0.52975	0.349375
UUGCUG	1.0524	1.0449	1.0439	0	0	0	1.0439	0.5262	0.52245	0.348758
GCGCCG	1.0606	1.019	1.061	0	0	0	1.061	0.5303	0.5095	0.350133
ACCGGC	1.0504	1.0293	1.0607	0	0	0	1.0607	0.5252	0.51465	0.350092
AGGUUC	1.0416	1.0056	1.093	0	0	0	1.093	0.5208	0.5028	0.352767
GAGGUG	1.0427	1.0399	1.0573	0	0	0	1.0573	0.52135	0.51995	0.349767
CGCAGC	1.0712	1.0032	1.0654	0	0	0	1.0654	0.5356	0.5016	0.350433
AGGCCA	1.0387	1.0337	1.0671	0	0	0	1.0671	0.51935	0.51685	0.35055
GGGUCC	1.0673	0.9877	1.0841	0	0	0	1.0841	0.53365	0.49385	0.351933
GGCACA	1.0502	1.0462	1.0426	0	0	0	1.0426	0.5251	0.5231	0.348467
CCUCUG	1.0633	1.0193	1.0562	0	0	0	1.0562	0.53165	0.50965	0.349583
AGCAAG	0.9841	1.0755	1.0784	0	0	0	1.0784	0.49205	0.53775	0.351367
UGGGGC	1.078	1.0113	1.0487	0	0	0	1.0487	0.539	0.50565	0.348892
GCGGGU	1.0447	0.9679	1.1253	0	0	0	1.1253	0.52235	0.48395	0.355267
UCAAAA	0.9505	1.0965	1.0906	0	0	0	1.0906	0.47525	0.54825	0.35235
UUGAAG	1.0175	1.0556	1.0644	0	0	0	1.0644	0.50875	0.5278	0.350158
UGCGGC	1.0704	1.0302	1.0369	0	0	0	1.0369	0.5352	0.5151	0.347867
UGGCCG	1.0513	1.0088	1.0774	0	0	0	1.0774	0.52565	0.5044	0.351242
CUCGCG	1.0448	0.9857	1.1069	0	0	0	1.1069	0.5224	0.49285	0.353692
GCUCCG	1.0793	0.9837	1.0742	0	0	0	1.0742	0.53965	0.49185	0.35095
CAUUUG	1.0254	1.0763	1.0353	0	0	0	1.0353	0.5127	0.53815	0.347692
GAUAUU	1.0305	1.1036	1.0027	0	0	0	1.0027	0.51525	0.5518	0.344958
AAUUGC	1.05	1.0563	1.0305	0	0	0	1.0305	0.525	0.52815	0.347275
GCACAG	1.0515	1.0149	1.0703	0	0	0	1.0703	0.52575	0.50745	0.350583
GACGCG	1.0564	1.0132	1.0669	0	0	0	1.0669	0.5282	0.5066	0.350283
GGGAUA	1.0408	1.029	1.0663	0	0	0	1.0663	0.5204	0.5145	0.3502
CUGCAG	1.0422	1.0251	1.0686	0	0	0	1.0686	0.5211	0.51255	0.350375
GCUAGA	1.0308	1.0722	1.0328	0	0	0	1.0328	0.5154	0.5361	0.347383
CACACG	1.0573	1.0176	1.0606	0	0	0	1.0606	0.52865	0.5088	0.349675
CAGUUG	1.0306	1.0357	1.069	0	0	0	1.069	0.5153	0.51785	0.350358
CCCGUU	1.083	0.9885	1.0638	0	0	0	1.0638	0.5415	0.49425	0.349925
GACGCA	1.0545	1.026	1.0546	0	0	0	1.0546	0.52725	0.513	0.349142
GAACGC	1.0504	1.0357	1.0484	0	0	0	1.0484	0.5252	0.51785	0.348575
GGCCAA	1.0413	1.0421	1.0509	0	0	0	1.0509	0.52065	0.52105	0.348767
AACAUG	0.9876	1.1009	1.0452	0	0	0	1.0452	0.4938	0.55045	0.348242
GGGGUA	1.0162	1.0406	1.0767	0	0	0	1.0767	0.5081	0.5203	0.35085
CGGCGC	1.0774	0.9994	1.0567	0	0	0	1.0567	0.5387	0.4997	0.349183
ACGACA	1.047	1.0521	1.0341	0	0	0	1.0341	0.5235	0.52605	0.347275
UUUUUU	1.0281	1.057	1.0475	0	0	0	1.0475	0.51405	0.5285	0.348342
AAGCCG	1.0435	1.0467	1.0417	0	0	0	1.0417	0.52175	0.52335	0.3478
UCUGGG	1.0538	0.9994	1.0787	0	0	0	1.0787	0.5269	0.4997	0.350883
AGACCU	1.0548	1.0553	1.0214	0	0	0	1.0214	0.5274	0.52765	0.346075
GAAUCA	0.9913	1.0762	1.0639	0	0	0	1.0639	0.49565	0.5381	0.349608
CGGAAU	1.0643	1.0351	1.0316	0	0	0	1.0316	0.53215	0.51755	0.346883
CCCUGC	1.0966	0.9935	1.0405	0	0	0	1.0405	0.5483	0.49675	0.347592
GUCCCG	1.0679	0.9889	1.0736	0	0	0	1.0736	0.53395	0.49445	0.350333
UGAGGU	1.0261	1.0249	1.0787	0	0	0	1.0787	0.51305	0.51245	0.3507
CAGCAG	1.0488	1.0214	1.0592	0	0	0	1.0592	0.5244	0.5107	0.34905
CGGUUG	1.0454	1.0023	1.0817	0	0	0	1.0817	0.5227	0.50115	0.350925
CGAGCU	1.0662	1.0152	1.0475	0	0	0	1.0475	0.5331	0.5076	0.348033
GACUAG	1.0213	1.0562	1.0512	0	0	0	1.0512	0.51065	0.5281	0.348325
AAGAGU	1.0092	1.0906	1.0288	0	0	0	1.0288	0.5046	0.5453	0.34645
GGAACG	1.0527	1.0395	1.0359	0	0	0	1.0359	0.52635	0.51975	0.347
ACUUGG	1.0322	1.029	1.0666	0	0	0	1.0666	0.5161	0.5145	0.349533
AGGCCG	1.0416	1.0089	1.0772	0	0	0	1.0772	0.5208	0.50445	0.350408
CACCUC	1.0688	1.0047	1.0539	0	0	0	1.0539	0.5344	0.50235	0.348442
AAGCGC	1.0288	1.0582	1.0403	0	0	0	1.0403	0.5144	0.5291	0.3473
CAGGGC	1.0599	1.0046	1.0627	0	0	0	1.0627	0.52995	0.5023	0.349158
ACAAAA	0.9642	1.1249	1.0378	0	0	0	1.0378	0.4821	0.56245	0.347058
AACAGG	0.9993	1.0686	1.059	0	0	0	1.059	0.49965	0.5343	0.348825
UUCGCG	1.0553	1.007	1.0644	0	0	0	1.0644	0.52765	0.5035	0.349258
AGGGUU	1.031	1.0344	1.0612	0	0	0	1.0612	0.5155	0.5172	0.348983
UGCCAC	1.0685	1.0148	1.0433	0	0	0	1.0433	0.53425	0.5074	0.347492
UAGAUU	1.0121	1.0921	1.0222	0	0	0	1.0222	0.50605	0.54605	0.345717
CGCGCG	1.058	1.0119	1.0564	0	0	0	1.0564	0.529	0.50595	0.348558
UGGGUG	1.0355	1.0281	1.0626	0	0	0	1.0626	0.51775	0.51405	0.349067
UGGAUG	1.0435	1.0263	1.0564	0	0	0	1.0564	0.52175	0.51315	0.34855
GCUCAG	1.0451	1.0008	1.0803	0	0	0	1.0803	0.52255	0.5004	0.350542
UGACCG	1.0391	1.0164	1.0706	0	0	0	1.0706	0.51955	0.5082	0.349725
ACGGGG	1.0211	1.044	1.0608	0	0	0	1.0608	0.51055	0.522	0.348892
AGCGCG	1.0391	1.0294	1.0574	0	0	0	1.0574	0.51955	0.5147	0.348608
GAGUAA	1.0002	1.0868	1.0383	0	0	0	1.0383	0.5001	0.5434	0.346967
GUUCCG	1.057	1.0029	1.0653	0	0	0	1.0653	0.5285	0.50145	0.349208
UUGGGA	1.037	1.0506	1.0375	0	0	0	1.0375	0.5185	0.5253	0.346883
ACCCCU	1.0862	0.9948	1.044	0	0	0	1.044	0.5431	0.4974	0.347417
AUCCAA	1.0337	1.0645	1.0266	0	0	0	1.0266	0.51685	0.53225	0.34595
CCCGCU	1.0858	0.9993	1.0396	0	0	0	1.0396	0.5429	0.49965	0.347025
GACCGG	1.0474	0.9923	1.085	0	0	0	1.085	0.5237	0.49615	0.350808
GCGGAA	1.0438	1.0265	1.0538	0	0	0	1.0538	0.5219	0.51325	0.348158
AGGGGU	1.0484	1.0036	1.072	0	0	0	1.072	0.5242	0.5018	0.349667
GGGUAA	1.0025	1.0563	1.0651	0	0	0	1.0651	0.50125	0.52815	0.349083
GAGGUU	1.0332	1.0388	1.0516	0	0	0	1.0516	0.5166	0.5194	0.347933
CCGCCA	1.0781	0.9901	1.0553	0	0	0	1.0553	0.53905	0.49505	0.348233
AGGCAA	0.9998	1.0728	1.0502	0	0	0	1.0502	0.4999	0.5364	0.34775
ACCUCG	1.0608	1.0157	1.0461	0	0	0	1.0461	0.5304	0.50785	0.347392
GCGCAC	1.0646	1.0026	1.0554	0	0	0	1.0554	0.5323	0.5013	0.348167
UCCUUG	1.0982	0.9742	1.0501	0	0	0	1.0501	0.5491	0.4871	0.347717
AGCCAA	1.0311	1.0468	1.0445	0	0	0	1.0445	0.51555	0.5234	0.347242
AACCAC	1.0512	1.039	1.032	0	0	0	1.032	0.5256	0.5195	0.346183
AAGCAG	0.9972	1.0403	1.0846	0	0	0	1.0846	0.4986	0.52015	0.350558
GCAACC	1.0538	1.0178	1.05	0	0	0	1.05	0.5269	0.5089	0.347633
AAUGGG	1.0282	1.0637	1.0294	0	0	0	1.0294	0.5141	0.53185	0.345892
ACUGGG	1.0379	1.0422	1.0412	0	0	0	1.0412	0.51895	0.5211	0.346875
AAAUGC	0.9944	1.0735	1.0533	0	0	0	1.0533	0.4972	0.53675	0.347875
UUGGGG	1.0589	0.9874	1.0746	0	0	0	1.0746	0.52945	0.4937	0.349625
ACAACC	1.0484	1.0397	1.0325	0	0	0	1.0325	0.5242	0.51985	0.346092
AGAGCG	1.0326	1.0551	1.0328	0	0	0	1.0328	0.5163	0.52755	0.346108
AAUCUG	1.003	1.0712	1.0454	0	0	0	1.0454	0.5015	0.5356	0.347083
CCUCAG	1.0422	1.0101	1.067	0	0	0	1.067	0.5211	0.50505	0.348858
ACCGCG	1.0448	1.0111	1.0632	0	0	0	1.0632	0.5224	0.50555	0.348525
CCAUCC	1.0864	0.9939	1.0388	0	0	0	1.0388	0.5432	0.49695	0.346492
UUUUGC	1.0553	1.0401	1.0237	0	0	0	1.0237	0.52765	0.52005	0.345233
UUCAUG	1.0391	1.0621	1.0178	0	0	0	1.0178	0.51955	0.53105	0.344733
CCGCAA	1.0391	1.0224	1.0575	0	0	0	1.0575	0.51955	0.5112	0.348042
GCGGAG	1.0736	1.0181	1.0269	0	0	0	1.0269	0.5368	0.50905	0.345458
GAAGGU	1.0134	1.0595	1.0456	0	0	0	1.0456	0.5067	0.52975	0.347008
CACCUA	1.0902	1.0142	1.0139	0	0	0	1.0139	0.5451	0.5071	0.34435
GGUCUG	1.0535	0.9968	1.0678	0	0	0	1.0678	0.52675	0.4984	0.348825
CUAGAU	1.035	1.0592	1.0238	0	0	0	1.0238	0.5175	0.5296	0.34515
ACGAGU	1.037	1.0587	1.0223	0	0	0	1.0223	0.5185	0.52935	0.345025
CAAUGG	1.031	1.0296	1.0573	0	0	0	1.0573	0.5155	0.5148	0.347933
GCGAAU	1.006	1.0671	1.0446	0	0	0	1.0446	0.503	0.53355	0.346858
CGCGAC	1.0532	0.9904	1.0739	0	0	0	1.0739	0.5266	0.4952	0.349283
CGCCCU	1.1029	0.9784	1.0359	0	0	0	1.0359	0.55145	0.4892	0.346092
GGGCGA	1.046	1.0141	1.0568	0	0	0	1.0568	0.523	0.50705	0.347808
UUGCAG	1.0706	1.0363	1.0097	0	0	0	1.0097	0.5353	0.51815	0.343858
GGUGAA	0.9974	1.061	1.0579	0	0	0	1.0579	0.4987	0.5305	0.34785
GACUCC	1.0771	1.0092	1.03	0	0	0	1.03	0.53855	0.5046	0.345525
CCCCUC	1.0769	0.967	1.0722	0	0	0	1.0722	0.53845	0.4835	0.349025
AUUCUU	1.0381	1.0624	1.0155	0	0	0	1.0155	0.51905	0.5312	0.344292
GGCUCG	1.0645	0.9966	1.0548	0	0	0	1.0548	0.53225	0.4983	0.347558
CCGCAC	1.0709	0.9797	1.0645	0	0	0	1.0645	0.53545	0.48985	0.3483
ACCGCC	1.0728	0.9781	1.064	0	0	0	1.064	0.5364	0.48905	0.348242
AUGAGU	1.0125	1.0731	1.0292	0	0	0	1.0292	0.50625	0.53655	0.345333
UUCCAU	1.0725	1.0098	1.032	0	0	0	1.032	0.53625	0.5049	0.345525
CGGAGG	1.0401	0.9853	1.0889	0	0	0	1.0889	0.52005	0.49265	0.350267
GCGCUG	1.0498	1.0296	1.0348	0	0	0	1.0348	0.5249	0.5148	0.34575
UUGCCA	1.0697	1.0353	1.0087	0	0	0	1.0087	0.53485	0.51765	0.343533
GCACAC	1.068	1.01	1.0354	0	0	0	1.0354	0.534	0.505	0.345733
AGCGGG	1.0228	1.0051	1.0855	0	0	0	1.0855	0.5114	0.50255	0.349908
AUUCAG	1.0279	1.0584	1.0268	0	0	0	1.0268	0.51395	0.5292	0.344992
ACUGAC	1.0371	1.0326	1.0434	0	0	0	1.0434	0.51855	0.5163	0.346375
CGAAUU	1.0291	1.0472	1.0367	0	0	0	1.0367	0.51455	0.5236	0.345808
ACUGGC	1.0519	1.0155	1.0451	0	0	0	1.0451	0.52595	0.50775	0.346467
CACCUU	1.0782	1.0098	1.0243	0	0	0	1.0243	0.5391	0.5049	0.344717
GAAUCU	1.0079	1.0454	1.0589	0	0	0	1.0589	0.50395	0.5227	0.347592
GGGUAG	1.0204	1.0237	1.068	0	0	0	1.068	0.5102	0.51185	0.348342
AUGGGC	1.0692	1.0148	1.028	0	0	0	1.028	0.5346	0.5074	0.345
GCAGUG	1.0276	1.0435	1.0404	0	0	0	1.0404	0.5138	0.52175	0.345992
AUCACC	1.0683	1.017	1.0257	0	0	0	1.0257	0.53415	0.5085	0.344725
GAGUCU	1.0222	1.0578	1.0308	0	0	0	1.0308	0.5111	0.5289	0.345133
ACGAAG	1.0084	1.0573	1.0451	0	0	0	1.0451	0.5042	0.52865	0.346325
AUCCUG	1.0581	1.0285	1.024	0	0	0	1.024	0.52905	0.51425	0.34455
UAGGGG	1.0304	1.005	1.0752	0	0	0	1.0752	0.5152	0.5025	0.348817
AUAGAA	0.9777	1.1119	1.0206	0	0	0	1.0206	0.48885	0.55595	0.344233
CCGGUU	1.0579	0.9983	1.054	0	0	0	1.054	0.52895	0.49915	0.347017
CAGCGG	1.0346	1.0147	1.0608	0	0	0	1.0608	0.5173	0.50735	0.347575
GGGGCG	1.0283	0.9936	1.0881	0	0	0	1.0881	0.51415	0.4968	0.349842
AAGACU	1.0047	1.0575	1.0472	0	0	0	1.0472	0.50235	0.52875	0.346383
GCAAGC	1.0223	1.0289	1.0582	0	0	0	1.0582	0.51115	0.51445	0.3473
CCGCCG	1.0561	0.9795	1.0738	0	0	0	1.0738	0.52805	0.48975	0.3486
UAGAAG	1.0077	1.082	1.0196	0	0	0	1.0196	0.50385	0.541	0.344075
AUGUGC	1.0368	1.07	1.0025	0	0	0	1.0025	0.5184	0.535	0.34265
UAGUGA	1.0168	1.0809	1.0115	0	0	0	1.0115	0.5084	0.54045	0.343392
AAAGGU	0.9891	1.0465	1.0735	0	0	0	1.0735	0.49455	0.52325	0.34855
AUGCCU	1.0562	1.0208	1.0318	0	0	0	1.0318	0.5281	0.5104	0.34505
AGAUAG	0.9976	1.0702	1.0401	0	0	0	1.0401	0.4988	0.5351	0.345667
CGAAGG	1.0381	1.0452	1.0245	0	0	0	1.0245	0.51905	0.5226	0.344358
UGAGUU	1.0184	1.0425	1.0469	0	0	0	1.0469	0.5092	0.52125	0.346225
GCCGAC	1.0758	0.9908	1.041	0	0	0	1.041	0.5379	0.4954	0.345717
CCAGCU	1.0523	1.0157	1.0391	0	0	0	1.0391	0.52615	0.50785	0.345517
UGUUUG	1.0192	1.034	1.0535	0	0	0	1.0535	0.5096	0.517	0.346683
GGGUGG	0.9936	1.0359	1.077	0	0	0	1.077	0.4968	0.51795	0.348625
GCCUAG	1.0451	0.9984	1.0629	0	0	0	1.0629	0.52255	0.4992	0.347442
GGGUGC	1.0322	0.9895	1.0846	0	0	0	1.0846	0.5161	0.49475	0.349242
GACUGG	1.0567	1.0179	1.0316	0	0	0	1.0316	0.52835	0.50895	0.344817
UCGCGA	1.0194	1.0099	1.0768	0	0	0	1.0768	0.5097	0.50495	0.348575
UUCCCC	1.071	0.9742	1.0608	0	0	0	1.0608	0.5355	0.4871	0.347233
UUUCAG	1.0075	1.0307	1.0677	0	0	0	1.0677	0.50375	0.51535	0.3478
UUUCCC	1.0668	1.0014	1.0375	0	0	0	1.0375	0.5334	0.5007	0.345267
AGAUAA	0.9751	1.1115	1.019	0	0	0	1.019	0.48755	0.55575	0.343717
CAGGUG	1.0174	0.9993	1.0889	0	0	0	1.0889	0.5087	0.49965	0.349542
AACUGG	1.0245	1.0229	1.0578	0	0	0	1.0578	0.51225	0.51145	0.346917
CAAGGC	1.0315	1.0203	1.0534	0	0	0	1.0534	0.51575	0.51015	0.34655
UUGCCU	1.0819	1.016	1.0068	0	0	0	1.0068	0.54095	0.508	0.342625
CUAAGA	1.0165	1.0643	1.023	0	0	0	1.023	0.50825	0.53215	0.3439
CCACGC	1.0697	0.9868	1.047	0	0	0	1.047	0.53485	0.4934	0.345875
AAUUUU	0.9893	1.0813	1.0328	0	0	0	1.0328	0.49465	0.54065	0.344683
GAACGG	1.043	1.0083	1.0515	0	0	0	1.0515	0.5215	0.50415	0.346192
AUUCAA	0.9846	1.0983	1.0192	0	0	0	1.0192	0.4923	0.54915	0.343442
ACGCCU	1.0733	0.9949	1.0333	0	0	0	1.0333	0.53665	0.49745	0.344567
CUUGCG	1.0593	0.9937	1.0478	0	0	0	1.0478	0.52965	0.49685	0.345717
AAGCAA	0.9647	1.079	1.0568	0	0	0	1.0568	0.48235	0.5395	0.346442
CCGCCU	1.0651	0.9709	1.0641	0	0	0	1.0641	0.53255	0.48545	0.347017
UCGAGC	1.0342	1.0109	1.055	0	0	0	1.055	0.5171	0.50545	0.346258
GCGAAC	1.0085	1.0485	1.0424	0	0	0	1.0424	0.50425	0.52425	0.34515
AGAGUC	1.0141	1.0331	1.052	0	0	0	1.052	0.50705	0.51655	0.345933
ACAAUG	1.0025	1.076	1.0195	0	0	0	1.0195	0.50125	0.538	0.343125
UUCUAG	1.0307	1.0288	1.0385	0	0	0	1.0385	0.51535	0.5144	0.344708
CCGGAC	1.0402	1.0114	1.0464	0	0	0	1.0464	0.5201	0.5057	0.345367
GCGCCU	1.0593	0.9967	1.0416	0	0	0	1.0416	0.52965	0.49835	0.344933
AGUGAC	1.0203	1.048	1.0291	0	0	0	1.0291	0.51015	0.524	0.343875
ACUUUG	1.0474	1.0373	1.0126	0	0	0	1.0126	0.5237	0.51865	0.342492
UGGUAG	1.0152	1.0379	1.044	0	0	0	1.044	0.5076	0.51895	0.345092
GGGCCA	1.0453	0.9973	1.0541	0	0	0	1.0541	0.52265	0.49865	0.3459
UUCUGC	1.049	1.0291	1.0185	0	0	0	1.0185	0.5245	0.51455	0.342925
CUCACC	1.0598	0.9944	1.0424	0	0	0	1.0424	0.5299	0.4972	0.344917
GCAAAC	1.0094	1.044	1.043	0	0	0	1.043	0.5047	0.522	0.34495
CGACAA	1.014	1.0349	1.0475	0	0	0	1.0475	0.507	0.51745	0.345325
AAACCU	1.0247	1.0564	1.0145	0	0	0	1.0145	0.51235	0.5282	0.342508
GUAGAC	1.0057	1.0512	1.0387	0	0	0	1.0387	0.50285	0.5256	0.344525
CGACCA	1.0489	1.0173	1.0291	0	0	0	1.0291	0.52445	0.50865	0.3437
CCACCA	1.0585	1.0094	1.0274	0	0	0	1.0274	0.52925	0.5047	0.343558
GAUCAC	1.0301	1.0249	1.0399	0	0	0	1.0399	0.51505	0.51245	0.344567
GCAUUC	1.0426	1.0095	1.0428	0	0	0	1.0428	0.5213	0.50475	0.344808
GGCGCA	1.0572	1.004	1.0335	0	0	0	1.0335	0.5286	0.502	0.344017
UGCGCG	1.0356	1.0118	1.047	0	0	0	1.047	0.5178	0.5059	0.345117
GGGGUC	1.0434	0.9892	1.0618	0	0	0	1.0618	0.5217	0.4946	0.34635
UACCCA	1.0741	1.0125	1.0075	0	0	0	1.0075	0.53705	0.50625	0.3418
GGCUCC	1.0769	0.9865	1.0303	0	0	0	1.0303	0.53845	0.49325	0.343667
AGGGCC	1.0557	0.9721	1.0656	0	0	0	1.0656	0.52785	0.48605	0.346583
UCUAGA	1.0159	1.0396	1.0374	0	0	0	1.0374	0.50795	0.5198	0.344192
CAUUCC	1.045	0.9965	1.051	0	0	0	1.051	0.5225	0.49825	0.345292
UUCUGG	1.0525	0.9969	1.043	0	0	0	1.043	0.52625	0.49845	0.344617
GCCUCG	1.0547	0.9838	1.0539	0	0	0	1.0539	0.52735	0.4919	0.345525
AGCAGC	1.0476	1.0029	1.0417	0	0	0	1.0417	0.5238	0.50145	0.344492
GACCCU	1.0763	0.986	1.0295	0	0	0	1.0295	0.53815	0.493	0.343442
CACGGA	1.0206	1.0281	1.043	0	0	0	1.043	0.5103	0.51405	0.344558
ACAGAC	1.026	1.0309	1.0346	0	0	0	1.0346	0.513	0.51545	0.343842
ACACAC	1.0531	1.0273	1.011	0	0	0	1.011	0.52655	0.51365	0.341867
AGUCCG	1.0447	0.9824	1.0643	0	0	0	1.0643	0.52235	0.4912	0.346308
AUUCCC	1.0653	1.0078	1.0176	0	0	0	1.0176	0.53265	0.5039	0.342358
GACGGG	1.0509	0.9915	1.0483	0	0	0	1.0483	0.52545	0.49575	0.344917
AAGGGC	1.0303	1.0085	1.0518	0	0	0	1.0518	0.51515	0.50425	0.3452
CGGGCC	1.0484	0.9791	1.0631	0	0	0	1.0631	0.5242	0.48955	0.346142
GAACCU	1.0365	1.0174	1.0365	0	0	0	1.0365	0.51825	0.5087	0.343908
CCGGUA	1.0474	0.9909	1.0521	0	0	0	1.0521	0.5237	0.49545	0.345208
CUGGUG	1.0382	0.9788	1.0731	0	0	0	1.0731	0.5191	0.4894	0.346933
GUUUCC	1.044	1.0026	1.043	0	0	0	1.043	0.522	0.5013	0.344383
UUUGAA	0.9875	1.0538	1.0481	0	0	0	1.0481	0.49375	0.5269	0.344792
AUCUGG	1.0437	1.0042	1.0415	0	0	0	1.0415	0.52185	0.5021	0.344242
CACAAG	1.0088	1.0363	1.0441	0	0	0	1.0441	0.5044	0.51815	0.344442
GUCCAG	1.0253	1.0074	1.0564	0	0	0	1.0564	0.51265	0.5037	0.345458
CUACCC	1.0848	0.9841	1.0201	0	0	0	1.0201	0.5424	0.49205	0.342425
AUCCAC	1.0606	1.0162	1.0121	0	0	0	1.0121	0.5303	0.5081	0.34175
GCUGAA	1.0058	1.0401	1.0426	0	0	0	1.0426	0.5029	0.52005	0.344258
GACUGC	1.0392	1.0037	1.0455	0	0	0	1.0455	0.5196	0.50185	0.344492
GGGUUG	1.0788	0.9723	1.0373	0	0	0	1.0373	0.5394	0.48615	0.343808
UUGAAC	1.0161	1.0367	1.0352	0	0	0	1.0352	0.50805	0.51835	0.3436
CAAGCG	1.0192	1.0335	1.0352	0	0	0	1.0352	0.5096	0.51675	0.343592
AAUCCA	1.0285	1.0376	1.0216	0	0	0	1.0216	0.51425	0.5188	0.342442
UAGCCC	1.0739	0.9914	1.0224	0	0	0	1.0224	0.53695	0.4957	0.342508
GAUCAG	1.0204	1.0115	1.0557	0	0	0	1.0557	0.5102	0.50575	0.345275
CCUCGG	1.0463	0.9817	1.0594	0	0	0	1.0594	0.52315	0.49085	0.345567
AUUGAA	0.9766	1.1027	1.0079	0	0	0	1.0079	0.4883	0.55135	0.341258
GCCGGC	1.0556	0.9846	1.0467	0	0	0	1.0467	0.5278	0.4923	0.344467
AGCGGC	1.0455	1.0273	1.014	0	0	0	1.014	0.52275	0.51365	0.341733
GGCUAG	1.05	1.0056	1.031	0	0	0	1.031	0.525	0.5028	0.343133
AGGCUC	1.0199	0.9978	1.0683	0	0	0	1.0683	0.50995	0.4989	0.346192
CCCCGU	1.0586	0.9772	1.0502	0	0	0	1.0502	0.5293	0.4886	0.344683
CGGCCG	1.0512	0.9914	1.0429	0	0	0	1.0429	0.5256	0.4957	0.344033
AGGGUA	1.0079	1.0403	1.0372	0	0	0	1.0372	0.50395	0.52015	0.34355
CCAGUU	1.042	1.006	1.0373	0	0	0	1.0373	0.521	0.503	0.34355
GCCCAU	1.0865	0.9632	1.0356	0	0	0	1.0356	0.54325	0.4816	0.343408
CACAUG	1.017	1.0497	1.0185	0	0	0	1.0185	0.5085	0.52485	0.341975
AGCCGC	1.0463	0.9903	1.0485	0	0	0	1.0485	0.52315	0.49515	0.344467
CUUGGG	1.035	0.9823	1.0676	0	0	0	1.0676	0.5175	0.49115	0.346042
AGACUC	1.0266	1.026	1.0321	0	0	0	1.0321	0.5133	0.513	0.343067
CCAGUC	1.0473	0.9829	1.0545	0	0	0	1.0545	0.52365	0.49145	0.344933
UUCGCC	1.0623	0.992	1.0301	0	0	0	1.0301	0.53115	0.496	0.342875
CGAUAC	1.0367	1.0256	1.0217	0	0	0	1.0217	0.51835	0.5128	0.342142
AACGGG	1.0281	1.0105	1.0453	0	0	0	1.0453	0.51405	0.50525	0.3441
ACUCAG	0.9957	1.0446	1.0435	0	0	0	1.0435	0.49785	0.5223	0.343942
GCAGCA	1.0334	1.0233	1.0271	0	0	0	1.0271	0.5167	0.51165	0.342575
GGGCAA	1.0007	1.0274	1.0556	0	0	0	1.0556	0.50035	0.5137	0.344942
GGCCAC	1.0379	0.9957	1.05	0	0	0	1.05	0.51895	0.49785	0.344467
AACCGC	1.0286	1.0038	1.051	0	0	0	1.051	0.5143	0.5019	0.344533
GGAGUU	1.0525	1.0017	1.0292	0	0	0	1.0292	0.52625	0.50085	0.342717
GGACAG	1.0138	1.0182	1.0513	0	0	0	1.0513	0.5069	0.5091	0.34455
CAGCCA	1.0417	0.9987	1.0429	0	0	0	1.0429	0.52085	0.49935	0.34385
UCCACG	1.0443	0.9967	1.042	0	0	0	1.042	0.52215	0.49835	0.34375
AGGUAG	1.0137	1.0427	1.0264	0	0	0	1.0264	0.50685	0.52135	0.342433
CUUCGA	1.0341	1.0103	1.0383	0	0	0	1.0383	0.51705	0.50515	0.343417
AAUGAA	0.9543	1.1011	1.0271	0	0	0	1.0271	0.47715	0.55055	0.342467
AGCGAC	1.0402	1.0059	1.0364	0	0	0	1.0364	0.5201	0.50295	0.343242
AAGUUG	0.9919	1.0443	1.046	0	0	0	1.046	0.49595	0.52215	0.344017
AAUCCC	1.0434	1.0071	1.0317	0	0	0	1.0317	0.5217	0.50355	0.342825
GGCGAC	1.0498	0.9933	1.0389	0	0	0	1.0389	0.5249	0.49665	0.343408
UGGGAC	1.0253	1.0153	1.0409	0	0	0	1.0409	0.51265	0.50765	0.343533
CCCUCG	1.0526	0.9734	1.0555	0	0	0	1.0555	0.5263	0.4867	0.34475
CUGGGC	1.057	0.9872	1.0371	0	0	0	1.0371	0.5285	0.4936	0.3432
GUGGCA	1.0209	1.0127	1.0473	0	0	0	1.0473	0.51045	0.50635	0.344017
GAUCAA	0.9945	1.0501	1.0361	0	0	0	1.0361	0.49725	0.52505	0.343067
GGAUGC	1.0385	0.968	1.0741	0	0	0	1.0741	0.51925	0.484	0.346225
AUGUUG	1.0275	1.0409	1.0119	0	0	0	1.0119	0.51375	0.52045	0.341017
CAAGCA	1.0019	1.0325	1.0454	0	0	0	1.0454	0.50095	0.51625	0.343767
GAUUGU	1.0448	1.0366	0.9982	0	0	0	0.9982	0.5224	0.5183	0.339817
CACUGG	1.0428	0.9886	1.0482	0	0	0	1.0482	0.5214	0.4943	0.343983
CCUCCC	1.0607	0.9811	1.0372	0	0	0	1.0372	0.53035	0.49055	0.343017
AUUCGG	1.0305	1.0124	1.036	0	0	0	1.036	0.51525	0.5062	0.342908
GCGGGC	1.0308	0.983	1.0651	0	0	0	1.0651	0.5154	0.4915	0.345333
AGGGUG	1.003	1.0339	1.0419	0	0	0	1.0419	0.5015	0.51695	0.343392
UCGCAG	1.0166	1.0267	1.035	0	0	0	1.035	0.5083	0.51335	0.342775
GGUUUU	1.0127	0.9907	1.0747	0	0	0	1.0747	0.50635	0.49535	0.346067
GAUAGU	1.0133	1.0636	1.0008	0	0	0	1.0008	0.50665	0.5318	0.339875
GCAGGU	1.0122	0.9979	1.0676	0	0	0	1.0676	0.5061	0.49895	0.345442
CGCGGC	1.0514	0.9677	1.0582	0	0	0	1.0582	0.5257	0.48385	0.344625
UCCCUG	1.0392	0.9956	1.0424	0	0	0	1.0424	0.5196	0.4978	0.3433
GGCCCU	1.0629	0.9739	1.0401	0	0	0	1.0401	0.53145	0.48695	0.343083
AACGAA	0.98	1.0617	1.035	0	0	0	1.035	0.49	0.53085	0.342642
GAAGUC	0.9896	1.0299	1.0568	0	0	0	1.0568	0.4948	0.51495	0.344425
CGUGAA	0.992	1.0348	1.0494	0	0	0	1.0494	0.496	0.5174	0.3438
ACGACC	1.0288	1.0027	1.0444	0	0	0	1.0444	0.5144	0.50135	0.343358
GCUCUG	1.0437	0.9956	1.0366	0	0	0	1.0366	0.52185	0.4978	0.342708
UCUGGC	1.0554	0.9729	1.0475	0	0	0	1.0475	0.5277	0.48645	0.343608
GAGCUC	1.0292	0.9845	1.0619	0	0	0	1.0619	0.5146	0.49225	0.344792
UCGGGG	1.0435	0.9839	1.048	0	0	0	1.048	0.52175	0.49195	0.343617
GGUCCC	1.0297	0.9571	1.0881	0	0	0	1.0881	0.51485	0.47855	0.346917
GACUGU	1.0045	1.0265	1.0436	0	0	0	1.0436	0.50225	0.51325	0.343183
GGGUUU	0.9964	1.0149	1.063	0	0	0	1.063	0.4982	0.50745	0.344775
UGAACG	1.0121	1.0233	1.0386	0	0	0	1.0386	0.50605	0.51165	0.342717
CUAGGG	1.021	0.9893	1.0637	0	0	0	1.0637	0.5105	0.49465	0.344808
CGGGUA	1.0278	0.9749	1.0708	0	0	0	1.0708	0.5139	0.48745	0.345358
GCACGC	1.0554	0.9905	1.0271	0	0	0	1.0271	0.5277	0.49525	0.341675
ACAAAG	0.9645	1.0623	1.0459	0	0	0	1.0459	0.48225	0.53115	0.343217
GGAUUU	1.0338	1.0161	1.0228	0	0	0	1.0228	0.5169	0.50805	0.341292
GGUGGG	1.0336	0.9767	1.0623	0	0	0	1.0623	0.5168	0.48835	0.344575
AGGACA	1.005	1.031	1.0366	0	0	0	1.0366	0.5025	0.5155	0.342433
AGAGGU	1.0146	1.0216	1.0356	0	0	0	1.0356	0.5073	0.5108	0.342283
GGAAGU	0.9877	1.0392	1.0449	0	0	0	1.0449	0.49385	0.5196	0.343058
CUAUUG	1.0559	1.0456	0.9701	0	0	0	0.9701	0.52795	0.5228	0.336808
CACAGG	1.0316	0.997	1.0425	0	0	0	1.0425	0.5158	0.4985	0.3428
CCGGAU	1.0515	0.9797	1.0399	0	0	0	1.0399	0.52575	0.48985	0.342583
AGUCCA	1.0219	1.0035	1.0455	0	0	0	1.0455	0.51095	0.50175	0.343033
UGGCCU	1.0506	0.9917	1.0286	0	0	0	1.0286	0.5253	0.49585	0.341625
GAUCCU	1.0635	1.0081	0.9992	0	0	0	0.9992	0.53175	0.50405	0.339167
GGAGGU	1.0007	1.0138	1.0562	0	0	0	1.0562	0.50035	0.5069	0.343908
AGUGAA	0.9806	1.0444	1.0456	0	0	0	1.0456	0.4903	0.5222	0.343017
CGGUAG	1.029	0.9672	1.0744	0	0	0	1.0744	0.5145	0.4836	0.345417
CCUGUG	1.0459	0.9794	1.0451	0	0	0	1.0451	0.52295	0.4897	0.342958
CCGUUG	1.0439	1.0024	1.0239	0	0	0	1.0239	0.52195	0.5012	0.341175
GCGGCC	1.0622	0.9969	1.0111	0	0	0	1.0111	0.5311	0.49845	0.340108
GGAUCC	1.045	0.9781	1.0462	0	0	0	1.0462	0.5225	0.48905	0.342958
UACCUG	1.0564	1	1.0128	0	0	0	1.0128	0.5282	0.5	0.340167
GACAGU	1.0132	1.0397	1.016	0	0	0	1.016	0.5066	0.51985	0.340408
GGUUCU	1.0377	0.997	1.0341	0	0	0	1.0341	0.51885	0.4985	0.341908
CGAACG	1.015	1.0144	1.0393	0	0	0	1.0393	0.5075	0.5072	0.342333
GGGCGC	1.0442	0.975	1.0494	0	0	0	1.0494	0.5221	0.4875	0.343167
UCUGAC	1.0201	0.9983	1.0501	0	0	0	1.0501	0.51005	0.49915	0.343217
CAGGUU	1.0331	0.9922	1.043	0	0	0	1.043	0.51655	0.4961	0.342608
CCACAC	1.0639	0.9883	1.0159	0	0	0	1.0159	0.53195	0.49415	0.340333
CGGGCG	1.0449	0.9578	1.0651	0	0	0	1.0651	0.52245	0.4789	0.344408
GCUGGC	1.0354	0.9995	1.0327	0	0	0	1.0327	0.5177	0.49975	0.341692
ACGCAG	1.0396	0.9906	1.0372	0	0	0	1.0372	0.5198	0.4953	0.34205
GGCAGU	1.0253	0.9906	1.0515	0	0	0	1.0515	0.51265	0.4953	0.343242
CUCCCG	1.0778	0.957	1.0323	0	0	0	1.0323	0.5389	0.4785	0.341617
UGCGAC	1.0584	1.0034	1.005	0	0	0	1.005	0.5292	0.5017	0.339317
GCUGGG	1.0196	0.9741	1.0731	0	0	0	1.0731	0.5098	0.48705	0.344992
CGACCG	1.0205	0.9891	1.0571	0	0	0	1.0571	0.51025	0.49455	0.34365
CUGGGU	1.0299	0.9771	1.0595	0	0	0	1.0595	0.51495	0.48855	0.343833
GGGUAC	1.0093	0.9962	1.0605	0	0	0	1.0605	0.50465	0.4981	0.343875
CAGCGC	1.0437	0.9811	1.0412	0	0	0	1.0412	0.52185	0.49055	0.342267
UUGAGU	1.0031	1.0443	1.0185	0	0	0	1.0185	0.50155	0.52215	0.340367
CAUGCC	1.0384	0.9736	1.0535	0	0	0	1.0535	0.5192	0.4868	0.34325
AGGUUG	1.0336	1.0333	0.9984	0	0	0	0.9984	0.5168	0.51665	0.338642
GAUCUC	1.0071	1.0195	1.0387	0	0	0	1.0387	0.50355	0.50975	0.342
AGUGCC	1.0446	0.9954	1.0249	0	0	0	1.0249	0.5223	0.4977	0.340817
CACGAC	1.0289	0.9966	1.0392	0	0	0	1.0392	0.51445	0.4983	0.341992
AUGGUG	1.0065	1.0424	1.0156	0	0	0	1.0156	0.50325	0.5212	0.340008
GAGUAC	1.0227	1.0275	1.0141	0	0	0	1.0141	0.51135	0.51375	0.339867
CUGAAU	1.0065	1.0454	1.0124	0	0	0	1.0124	0.50325	0.5227	0.339725
GGUGAG	1.0202	1.0229	1.02	0	0	0	1.02	0.5101	0.51145	0.340258
CCGACU	1.0565	0.9853	1.021	0	0	0	1.021	0.52825	0.49265	0.340317
UAGGAA	0.9755	1.0609	1.0263	0	0	0	1.0263	0.48775	0.53045	0.34075
AAGGAU	0.9778	1.0339	1.0504	0	0	0	1.0504	0.4889	0.51695	0.342708
UAGAGG	1.0194	1.0186	1.024	0	0	0	1.024	0.5097	0.5093	0.3405
AAUUCG	0.9896	1.0558	1.0166	0	0	0	1.0166	0.4948	0.5279	0.339883
CUGCGC	1.0336	0.9837	1.0446	0	0	0	1.0446	0.5168	0.49185	0.342208
UAGAAC	0.993	1.0505	1.0183	0	0	0	1.0183	0.4965	0.52525	0.340008
GUAGAG	1.0004	1.047	1.0143	0	0	0	1.0143	0.5002	0.5235	0.339667
GGCGAU	1.0151	1.0268	1.0197	0	0	0	1.0197	0.50755	0.5134	0.340108
UGCGCA	1.0187	1.0265	1.0164	0	0	0	1.0164	0.50935	0.51325	0.339833
CCCGUC	1.062	0.9559	1.0436	0	0	0	1.0436	0.531	0.47795	0.342092
UGAGUC	1.0247	1.011	1.0257	0	0	0	1.0257	0.51235	0.5055	0.340592
UCCCGC	1.0602	0.9624	1.0388	0	0	0	1.0388	0.5301	0.4812	0.341683
AGUUCU	0.9948	1.0108	1.0557	0	0	0	1.0557	0.4974	0.5054	0.343083
ACAGGA	0.9834	1.0543	1.0231	0	0	0	1.0231	0.4917	0.52715	0.340325
GCGGUG	1.0118	1.0293	1.0196	0	0	0	1.0196	0.5059	0.51465	0.340025
CGGCAA	1.036	1	1.0246	0	0	0	1.0246	0.518	0.5	0.340433
AGUGAG	0.9935	1.0377	1.029	0	0	0	1.029	0.49675	0.51885	0.340767
ACAUUG	1.0102	1.0433	1.0067	0	0	0	1.0067	0.5051	0.52165	0.338908
GCGAUA	1.0033	1.0463	1.0104	0	0	0	1.0104	0.50165	0.52315	0.3392
UAGACC	1.0106	1.017	1.0323	0	0	0	1.0323	0.5053	0.5085	0.341017
GAAGCU	1	1.036	1.0237	0	0	0	1.0237	0.5	0.518	0.340283
AGCACG	1.0059	1.0231	1.0307	0	0	0	1.0307	0.50295	0.51155	0.340867
ACGCCA	1.0402	1.0127	1.0066	0	0	0	1.0066	0.5201	0.50635	0.338842
CGACAU	1.0558	1.0094	0.9943	0	0	0	0.9943	0.5279	0.5047	0.337817
AGGUCC	1.0227	0.9812	1.0556	0	0	0	1.0556	0.51135	0.4906	0.342925
AGCACU	1.0215	1.0193	1.0186	0	0	0	1.0186	0.51075	0.50965	0.339833
GCGCAA	1.0222	1.0219	1.0149	0	0	0	1.0149	0.5111	0.51095	0.339492
CGGCGA	1.0198	1.0091	1.0299	0	0	0	1.0299	0.5099	0.50455	0.340725
UGCAGC	1.0205	0.9983	1.0399	0	0	0	1.0399	0.51025	0.49915	0.34155
GGUAGC	1.0305	0.9747	1.0535	0	0	0	1.0535	0.51525	0.48735	0.342683
GGAUUG	1.0188	1.0168	1.0231	0	0	0	1.0231	0.5094	0.5084	0.34015
CUAGGA	1.0101	1.0269	1.0214	0	0	0	1.0214	0.50505	0.51345	0.339983
UCUGAA	0.9824	1.0476	1.0275	0	0	0	1.0275	0.4912	0.5238	0.340417
UGUGCC	1.0199	1.0067	1.0309	0	0	0	1.0309	0.50995	0.50335	0.3407
ACGGCC	1.0464	0.967	1.0441	0	0	0	1.0441	0.5232	0.4835	0.3418
CAGGAU	1.004	1.0369	1.0165	0	0	0	1.0165	0.502	0.51845	0.339492
UUUCAC	1.0265	1.0024	1.0284	0	0	0	1.0284	0.51325	0.5012	0.340475
AUGUCC	1.0296	1.0036	1.0239	0	0	0	1.0239	0.5148	0.5018	0.340083
UUGGAG	1.0229	0.9908	1.0434	0	0	0	1.0434	0.51145	0.4954	0.341708
ACUGAA	0.9694	1.0497	1.0378	0	0	0	1.0378	0.4847	0.52485	0.341225
AUAGAG	1.0008	1.084	0.972	0	0	0	0.972	0.5004	0.542	0.335733
UACGAG	1.0264	1.0325	0.9979	0	0	0	0.9979	0.5132	0.51625	0.337892
GACGUG	1.0105	1.0041	1.0422	0	0	0	1.0422	0.50525	0.50205	0.341583
CCUAAG	1.0369	1.0036	1.0162	0	0	0	1.0162	0.51845	0.5018	0.339408
UGCCGC	1.0426	0.9618	1.052	0	0	0	1.052	0.5213	0.4809	0.342367
ACGCCG	1.0345	0.9712	1.0505	0	0	0	1.0505	0.51725	0.4856	0.342225
AAUUGG	1.0169	1.0189	1.0203	0	0	0	1.0203	0.50845	0.50945	0.3397
AAAGCU	0.98	1.0471	1.0282	0	0	0	1.0282	0.49	0.52355	0.340292
GAGUGG	1.0519	0.9747	1.0287	0	0	0	1.0287	0.52595	0.48735	0.340333
GCACGG	1.0233	0.9861	1.0456	0	0	0	1.0456	0.51165	0.49305	0.341717
AGGCGG	1.0158	0.9873	1.0519	0	0	0	1.0519	0.5079	0.49365	0.342242
UCCGCA	1.0343	0.9831	1.0375	0	0	0	1.0375	0.51715	0.49155	0.341033
UGGGCG	1.07	0.9858	0.9987	0	0	0	0.9987	0.535	0.4929	0.337767
CGCCAC	1.0538	0.9778	1.0229	0	0	0	1.0229	0.5269	0.4889	0.339783
GCGCGG	1.0356	0.9716	1.047	0	0	0	1.047	0.5178	0.4858	0.341767
AGAGUA	0.9745	1.0761	1.0031	0	0	0	1.0031	0.48725	0.53805	0.338067
CCGAUC	1.0388	0.9718	1.0427	0	0	0	1.0427	0.5194	0.4859	0.341333
CAUGGC	1.0253	0.9985	1.028	0	0	0	1.028	0.51265	0.49925	0.339983
AACAGC	0.9894	1.0351	1.027	0	0	0	1.027	0.4947	0.51755	0.339875
UUCGAC	1.0255	1.0004	1.0255	0	0	0	1.0255	0.51275	0.5002	0.339742
CAUGAC	1.0262	1.0059	1.0191	0	0	0	1.0191	0.5131	0.50295	0.339192
UGGAGC	1.0266	1.0003	1.0243	0	0	0	1.0243	0.5133	0.50015	0.339625
ACGGAA	0.9892	1.0248	1.037	0	0	0	1.037	0.4946	0.5124	0.340667
GAAGUU	0.9975	1.0374	1.0156	0	0	0	1.0156	0.49875	0.5187	0.338842
CAAAAU	0.9473	1.0897	1.0135	0	0	0	1.0135	0.47365	0.54485	0.338667
CGGGUU	1.0242	0.9646	1.0616	0	0	0	1.0616	0.5121	0.4823	0.342667
AGGCAU	1.0349	1.0183	0.9971	0	0	0	0.9971	0.51745	0.50915	0.337283
ACAGGC	1.0162	1.0015	1.0325	0	0	0	1.0325	0.5081	0.50075	0.340225
GUUCCC	1.0334	0.9602	1.0566	0	0	0	1.0566	0.5167	0.4801	0.342233
AAGCGG	1.0094	1.0113	1.0294	0	0	0	1.0294	0.5047	0.50565	0.339958
GGUAAG	0.9852	1.0365	1.0281	0	0	0	1.0281	0.4926	0.51825	0.339825
CGCGCA	1.0377	0.9753	1.0367	0	0	0	1.0367	0.51885	0.48765	0.340533
GUAGGC	1.0074	0.9809	1.061	0	0	0	1.061	0.5037	0.49045	0.342525
CGCGGA	1.0469	0.9788	1.0231	0	0	0	1.0231	0.52345	0.4894	0.339325
UACCCC	1.0564	0.9799	1.0123	0	0	0	1.0123	0.5282	0.48995	0.338408
AGGCCU	1.0209	0.9924	1.0352	0	0	0	1.0352	0.51045	0.4962	0.340308
AACGAC	0.9966	1.0345	1.017	0	0	0	1.017	0.4983	0.51725	0.338758
UGACGG	1.0205	0.9887	1.0387	0	0	0	1.0387	0.51025	0.49435	0.34055
UGGAAC	1.0144	1.0156	1.0175	0	0	0	1.0175	0.5072	0.5078	0.33875
ACUCUG	1.0384	0.9965	1.0126	0	0	0	1.0126	0.5192	0.49825	0.338342
CAUUCG	1.0194	0.9923	1.0358	0	0	0	1.0358	0.5097	0.49615	0.340275
UAGGCA	1.0374	1.0089	1.001	0	0	0	1.001	0.5187	0.50445	0.337358
CGGAGC	1.0433	0.9841	1.0197	0	0	0	1.0197	0.52165	0.49205	0.3389
UAAGAA	0.9545	1.0882	1.0043	0	0	0	1.0043	0.47725	0.5441	0.337608
GACUCG	1.0267	0.9919	1.0281	0	0	0	1.0281	0.51335	0.49595	0.339567
UGCUCG	1.0229	0.9911	1.0326	0	0	0	1.0326	0.51145	0.49555	0.339933
CUGCGG	1.0261	0.9745	1.0457	0	0	0	1.0457	0.51305	0.48725	0.341
UGCCCU	1.0739	0.9532	1.0192	0	0	0	1.0192	0.53695	0.4766	0.338792
UGCAAA	0.9749	1.0477	1.0228	0	0	0	1.0228	0.48745	0.52385	0.339017
UUGAAU	0.9914	1.0398	1.014	0	0	0	1.014	0.4957	0.5199	0.338267
UCUCGA	1.0054	1	1.0393	0	0	0	1.0393	0.5027	0.5	0.340333
AGGACC	1.0199	0.9939	1.0307	0	0	0	1.0307	0.50995	0.49695	0.3396
CCUGCA	1.0466	0.987	1.0109	0	0	0	1.0109	0.5233	0.4935	0.33795
CUAGAC	1.0049	1.0037	1.0355	0	0	0	1.0355	0.50245	0.50185	0.339967
CCCACA	1.0449	0.974	1.025	0	0	0	1.025	0.52245	0.487	0.339075
UUCGCA	1.0155	1.0026	1.0252	0	0	0	1.0252	0.50775	0.5013	0.339042
CCUGGU	1.0354	0.9792	1.0283	0	0	0	1.0283	0.5177	0.4896	0.339267
CCCGUA	1.0469	0.9774	1.0184	0	0	0	1.0184	0.52345	0.4887	0.338425
UGGGCA	1.0268	0.997	1.0188	0	0	0	1.0188	0.5134	0.4985	0.33845
UGGUUG	1.0351	0.9705	1.0367	0	0	0	1.0367	0.51755	0.48525	0.339917
GCUCGC	1.0197	0.9707	1.0518	0	0	0	1.0518	0.50985	0.48535	0.341167
CAAGUG	0.9803	1.0572	1.0047	0	0	0	1.0047	0.49015	0.5286	0.337242
UCCUGG	1.0573	0.9501	1.0348	0	0	0	1.0348	0.52865	0.47505	0.33975
AAGUCC	0.9867	1.0088	1.0466	0	0	0	1.0466	0.49335	0.5044	0.340725
AUAGCC	1.0309	1.0287	0.982	0	0	0	0.982	0.51545	0.51435	0.3353
GGGGCU	1.0444	0.9523	1.0448	0	0	0	1.0448	0.5222	0.47615	0.340525
ACUCGG	1.029	0.9882	1.024	0	0	0	1.024	0.5145	0.4941	0.338767
GGAGCG	1.0208	0.9713	1.0483	0	0	0	1.0483	0.5104	0.48565	0.340725
ACCGUG	1.0041	1.013	1.0232	0	0	0	1.0232	0.50205	0.5065	0.338625
AUCCCA	1.0266	1.0104	1.0029	0	0	0	1.0029	0.5133	0.5052	0.3369
AGUUUC	1.0065	1.0156	1.0174	0	0	0	1.0174	0.50325	0.5078	0.338075
AAGUUC	0.9856	1.0135	1.0404	0	0	0	1.0404	0.4928	0.50675	0.339992
AAGAUA	0.957	1.084	0.9982	0	0	0	0.9982	0.4785	0.542	0.33645
CAGUCC	1.0235	0.975	1.0406	0	0	0	1.0406	0.51175	0.4875	0.339975
CGGGCA	1.03	0.994	1.015	0	0	0	1.015	0.515	0.497	0.337833
GGCAAC	1.0124	1.007	1.0193	0	0	0	1.0193	0.5062	0.5035	0.338167
GCGACG	1.0476	0.9705	1.0205	0	0	0	1.0205	0.5238	0.48525	0.338258
AUGCAG	1.0228	1.0312	0.9844	0	0	0	0.9844	0.5114	0.5156	0.335233
GACAUU	1.0038	1.0115	1.0231	0	0	0	1.0231	0.5019	0.50575	0.338458
AGGGCG	1.0076	0.9752	1.0555	0	0	0	1.0555	0.5038	0.4876	0.34115
CGGAAC	1.0039	0.9935	1.0403	0	0	0	1.0403	0.50195	0.49675	0.339833
UCGUGA	1.0258	1.0003	1.0113	0	0	0	1.0113	0.5129	0.50015	0.337392
CUUCUG	1.0143	0.9853	1.0375	0	0	0	1.0375	0.50715	0.49265	0.33955
GACCUC	1.0224	0.9894	1.0252	0	0	0	1.0252	0.5112	0.4947	0.338517
GGGCAU	1.0421	0.9932	1.0013	0	0	0	1.0013	0.52105	0.4966	0.336492
CAGGAC	1.0076	1.0055	1.0234	0	0	0	1.0234	0.5038	0.50275	0.338325
GGCCGC	1.0091	0.9817	1.0456	0	0	0	1.0456	0.50455	0.49085	0.340167
UUUUCU	1.0091	1.0254	1.0017	0	0	0	1.0017	0.50455	0.5127	0.336492
AUCGAG	0.9905	1.0184	1.0273	0	0	0	1.0273	0.49525	0.5092	0.338625
AACCAA	0.9848	1.0431	1.0082	0	0	0	1.0082	0.4924	0.52155	0.337025
AACUCG	0.9932	1.0163	1.0263	0	0	0	1.0263	0.4966	0.50815	0.338508
UAGGAG	1.0175	1.0054	1.0129	0	0	0	1.0129	0.50875	0.5027	0.337392
CGGCCU	1.0344	0.9811	1.0201	0	0	0	1.0201	0.5172	0.49055	0.337975
AAGGGU	0.9832	1.0455	1.0066	0	0	0	1.0066	0.4916	0.52275	0.336825
UGGGUA	0.9837	1.0065	1.0451	0	0	0	1.0451	0.49185	0.50325	0.340033
UGGUUC	0.9972	0.9934	1.0447	0	0	0	1.0447	0.4986	0.4967	0.34
UUGCCG	1.0405	0.9675	1.0272	0	0	0	1.0272	0.52025	0.48375	0.338533
UGCCAA	1.014	1.0137	1.0074	0	0	0	1.0074	0.507	0.50685	0.336875
UGGCGU	1.0261	1.0152	0.9937	0	0	0	0.9937	0.51305	0.5076	0.335725
AUAGCG	1.0344	1.0331	0.9674	0	0	0	0.9674	0.5172	0.51655	0.333525
AUUCUA	1.021	1.0233	0.9906	0	0	0	0.9906	0.5105	0.51165	0.335458
GCGCUC	1.0242	0.9815	1.0291	0	0	0	1.0291	0.5121	0.49075	0.338658
CGAAUC	1.0031	1.0068	1.0247	0	0	0	1.0247	0.50155	0.5034	0.338275
GUAGCC	1.0348	0.9772	1.0223	0	0	0	1.0223	0.5174	0.4886	0.33805
GGCUGC	1.0323	0.9746	1.0274	0	0	0	1.0274	0.51615	0.4873	0.338475
CGCACG	1.0213	0.966	1.047	0	0	0	1.047	0.51065	0.483	0.340108
AAGGCG	0.9947	1.0154	1.0241	0	0	0	1.0241	0.49735	0.5077	0.338192
CCGUGG	1.0304	0.9748	1.0287	0	0	0	1.0287	0.5152	0.4874	0.33855
AUGCGG	1.0152	1.0078	1.0107	0	0	0	1.0107	0.5076	0.5039	0.337033
CGGAUG	1.0336	0.9784	1.0214	0	0	0	1.0214	0.5168	0.4892	0.3379
CGCCAA	1.0198	0.9741	1.039	0	0	0	1.039	0.5099	0.48705	0.339325
UUUUCG	1.021	0.9735	1.0383	0	0	0	1.0383	0.5105	0.48675	0.339258
AGCACA	1.0009	1.0245	1.0066	0	0	0	1.0066	0.50045	0.51225	0.33655
CCUUCC	1.0507	0.9564	1.0247	0	0	0	1.0247	0.52535	0.4782	0.338042
CACGGC	1.0298	0.9788	1.0231	0	0	0	1.0231	0.5149	0.4894	0.3379
CAUGAA	0.9671	1.0544	1.01	0	0	0	1.01	0.48355	0.5272	0.336792
UUCAAA	0.9364	1.0602	1.0349	0	0	0	1.0349	0.4682	0.5301	0.338867
GCUGCG	1.026	0.9689	1.0363	0	0	0	1.0363	0.513	0.48445	0.338958
UGAGCU	1.0199	0.998	1.0129	0	0	0	1.0129	0.50995	0.499	0.336975
GUGGAA	0.9679	1.0101	1.0522	0	0	0	1.0522	0.48395	0.50505	0.3402
AGGGAC	1.0006	1.0055	1.0237	0	0	0	1.0237	0.5003	0.50275	0.337792
ACGGAG	1.0054	0.9912	1.0332	0	0	0	1.0332	0.5027	0.4956	0.338583
GGUGGC	1.0295	0.9467	1.0536	0	0	0	1.0536	0.51475	0.47335	0.340283
GACCGC	1.0192	0.9716	1.0389	0	0	0	1.0389	0.5096	0.4858	0.33905
AGCGCA	1.0087	1.0112	1.0094	0	0	0	1.0094	0.50435	0.5056	0.336558
AACAAG	0.9491	1.0693	1.0104	0	0	0	1.0104	0.47455	0.53465	0.3366
CAACAG	0.9851	1.0108	1.0327	0	0	0	1.0327	0.49255	0.5054	0.338442
AAGGUG	0.976	1.0252	1.0273	0	0	0	1.0273	0.488	0.5126	0.337983
ACUCCG	1.0346	0.9943	0.9996	0	0	0	0.9996	0.5173	0.49715	0.335675
GGCGGU	1.001	0.9792	1.0482	0	0	0	1.0482	0.5005	0.4896	0.339717
AGUUUU	0.9759	1.0348	1.0176	0	0	0	1.0176	0.48795	0.5174	0.337158
GCCAGU	1.0286	0.9815	1.0181	0	0	0	1.0181	0.5143	0.49075	0.337192
CGCCGC	1.0265	0.9703	1.0314	0	0	0	1.0314	0.51325	0.48515	0.3383
UGACUC	1.0169	1.0028	1.0081	0	0	0	1.0081	0.50845	0.5014	0.336325
CUGAAC	0.9919	1.0039	1.0319	0	0	0	1.0319	0.49595	0.50195	0.3383
UGGGUU	1.0427	0.9866	0.9984	0	0	0	0.9984	0.52135	0.4933	0.335508
AGCCCU	1.0349	0.9765	1.0157	0	0	0	1.0157	0.51745	0.48825	0.3369
GCGGCG	1.0415	0.9537	1.0318	0	0	0	1.0318	0.52075	0.47685	0.338233
GAGGUC	1.0132	0.9901	1.0235	0	0	0	1.0235	0.5066	0.49505	0.337525
GCCAAC	1.0236	0.9732	1.03	0	0	0	1.03	0.5118	0.4866	0.338067
UGCAAG	0.9889	1.0119	1.0252	0	0	0	1.0252	0.49445	0.50595	0.3376
GCCUCC	1.0286	0.968	1.0293	0	0	0	1.0293	0.5143	0.484	0.337933
GGUGUG	1.0035	0.9576	1.0643	0	0	0	1.0643	0.50175	0.4788	0.340808
UGCGGA	1.0127	0.9947	1.0178	0	0	0	1.0178	0.50635	0.49735	0.336917
GCCGCA	1.007	0.976	1.0421	0	0	0	1.0421	0.5035	0.488	0.338933
CGGCCA	1.0113	0.9801	1.0335	0	0	0	1.0335	0.50565	0.49005	0.3382
GAAUAC	0.9921	1.0401	0.9926	0	0	0	0.9926	0.49605	0.52005	0.334783
CGUGAG	0.9819	0.9931	1.0498	0	0	0	1.0498	0.49095	0.49655	0.33955
AGCUGG	1.0238	0.9711	1.0297	0	0	0	1.0297	0.5119	0.48555	0.337858
CGCGUG	0.9897	0.9914	1.0434	0	0	0	1.0434	0.49485	0.4957	0.338992
AUUCUC	1.0195	1.0128	0.9918	0	0	0	0.9918	0.50975	0.5064	0.334658
CCAAGU	0.9848	1.0113	1.028	0	0	0	1.028	0.4924	0.50565	0.337675
AACGGC	1.0255	0.996	1.0025	0	0	0	1.0025	0.51275	0.498	0.335542
AGGAUA	0.9806	1.0291	1.0142	0	0	0	1.0142	0.4903	0.51455	0.336508
AUAGGG	0.9861	1.0342	1.0035	0	0	0	1.0035	0.49305	0.5171	0.335608
ACCGCA	1.0246	0.9842	1.0149	0	0	0	1.0149	0.5123	0.4921	0.33655
CAUGGG	1.024	0.9645	1.0351	0	0	0	1.0351	0.512	0.48225	0.338225
GUAGAU	0.982	1.0307	1.0108	0	0	0	1.0108	0.491	0.51535	0.336192
GAGUUA	1.0004	1.0008	1.0218	0	0	0	1.0218	0.5002	0.5004	0.337067
UCGAAG	0.9961	0.9933	1.0334	0	0	0	1.0334	0.49805	0.49665	0.338017
UCUGCC	1.0358	0.9704	1.0166	0	0	0	1.0166	0.5179	0.4852	0.336617
UCAAAG	0.9487	1.0342	1.0396	0	0	0	1.0396	0.47435	0.5171	0.338508
AGGAGU	1.0022	1.0148	1.0053	0	0	0	1.0053	0.5011	0.5074	0.335633
UGUAGA	0.9864	1.0392	0.9962	0	0	0	0.9962	0.4932	0.5196	0.334833
CAGCAA	0.9886	1.0207	1.0124	0	0	0	1.0124	0.4943	0.51035	0.336175
CAACAC	0.9974	1.0205	1.0038	0	0	0	1.0038	0.4987	0.51025	0.335458
GCCACA	1.0199	1.0002	1.0016	0	0	0	1.0016	0.50995	0.5001	0.335275
AAGGCU	0.9712	1.0196	1.0308	0	0	0	1.0308	0.4856	0.5098	0.3377
ACGGCA	1.036	0.994	0.9916	0	0	0	0.9916	0.518	0.497	0.334433
ACUAGA	0.9805	1.0394	1.0015	0	0	0	1.0015	0.49025	0.5197	0.335242
UUCGAA	0.9914	1.0074	1.0224	0	0	0	1.0224	0.4957	0.5037	0.336967
GCAUGG	0.9978	0.9874	1.0359	0	0	0	1.0359	0.4989	0.4937	0.338083
GCCCCU	1.0384	0.964	1.0183	0	0	0	1.0183	0.5192	0.482	0.336583
AUCGAU	0.9952	1.0376	0.9874	0	0	0	0.9874	0.4976	0.5188	0.333967
GGGAUC	1.0205	0.9686	1.0305	0	0	0	1.0305	0.51025	0.4843	0.337508
GGGCUG	1.0403	0.9588	1.0204	0	0	0	1.0204	0.52015	0.4794	0.336658
AGGUGG	0.9746	0.9937	1.0511	0	0	0	1.0511	0.4873	0.49685	0.339208
AGUCUG	0.9909	1.0226	1.0058	0	0	0	1.0058	0.49545	0.5113	0.335425
ACGCAC	1.0207	0.9852	1.0133	0	0	0	1.0133	0.51035	0.4926	0.336042
AGCCGG	1.036	0.9536	1.0287	0	0	0	1.0287	0.518	0.4768	0.33725
CUUGCA	1.032	0.9903	0.9959	0	0	0	0.9959	0.516	0.49515	0.334508
CAUCCC	1.0356	0.9606	1.022	0	0	0	1.022	0.5178	0.4803	0.336683
UUCGGG	1.0269	0.9556	1.0357	0	0	0	1.0357	0.51345	0.4778	0.337825
AGACUU	1.0003	1.004	1.0136	0	0	0	1.0136	0.50015	0.502	0.335958
GCGGUU	0.9889	0.9677	1.0613	0	0	0	1.0613	0.49445	0.48385	0.339933
AAGGAC	0.9865	1.0215	1.0098	0	0	0	1.0098	0.49325	0.51075	0.335633
ACACGC	1.0248	0.9768	1.0161	0	0	0	1.0161	0.5124	0.4884	0.33615
CCAACA	0.9948	1.0083	1.0144	0	0	0	1.0144	0.4974	0.50415	0.335992
AUCCCC	1.0328	0.9664	1.0182	0	0	0	1.0182	0.5164	0.4832	0.3363
AGCUCG	1.0108	0.9695	1.037	0	0	0	1.037	0.5054	0.48475	0.337858
CAGUUC	1.0102	0.9925	1.0145	0	0	0	1.0145	0.5051	0.49625	0.335975
GAUCGA	0.9954	1.013	1.0086	0	0	0	1.0086	0.4977	0.5065	0.335467
GACGCU	1.0222	0.9815	1.0131	0	0	0	1.0131	0.5111	0.49075	0.335825
UUGGAA	0.9729	1.0205	1.0232	0	0	0	1.0232	0.48645	0.51025	0.33665
GAAUCG	0.9809	1.0098	1.0256	0	0	0	1.0256	0.49045	0.5049	0.336825
UGGGCC	1.0369	0.9538	1.0253	0	0	0	1.0253	0.51845	0.4769	0.336775
GCCCUC	1.0388	0.9517	1.0255	0	0	0	1.0255	0.5194	0.47585	0.336792
GAGCUU	1.0075	1.0116	0.9964	0	0	0	0.9964	0.50375	0.5058	0.334325
CGGAGU	1.0365	0.9668	1.0117	0	0	0	1.0117	0.51825	0.4834	0.335558
ACCAGU	1.0084	0.9967	1.0097	0	0	0	1.0097	0.5042	0.49835	0.335375
GUAAAA	0.9067	1.0805	1.0275	0	0	0	1.0275	0.45335	0.54025	0.33685
UUUGGG	1.0116	1.0034	0.9997	0	0	0	0.9997	0.5058	0.5017	0.334533
GGGCCG	1.0023	0.959	1.0533	0	0	0	1.0533	0.50115	0.4795	0.338992
CAGCCU	1.0271	0.9796	1.0077	0	0	0	1.0077	0.51355	0.4898	0.335175
UUGCAA	1.0026	1.0209	0.9907	0	0	0	0.9907	0.5013	0.51045	0.333742
AGCAUC	1.0016	1.0039	1.0085	0	0	0	1.0085	0.5008	0.50195	0.335208
GAAUAG	0.9675	1.0423	1.0035	0	0	0	1.0035	0.48375	0.52115	0.334733
CUCAUG	0.99	1.0019	1.0214	0	0	0	1.0214	0.495	0.50095	0.336225
UGGCUC	1.0505	0.9692	0.9935	0	0	0	0.9935	0.52525	0.4846	0.333892
UGCGCU	1.0218	1.0035	0.9875	0	0	0	0.9875	0.5109	0.50175	0.333358
CGCCGG	1.0218	0.9442	1.0468	0	0	0	1.0468	0.5109	0.4721	0.3383
UAAAGA	0.948	1.086	0.9788	0	0	0	0.9788	0.474	0.543	0.332633
GUGAAG	0.9863	0.9976	1.0288	0	0	0	1.0288	0.49315	0.4988	0.336792
CUCAAG	0.9898	0.9967	1.0262	0	0	0	1.0262	0.4949	0.49835	0.336575
UAGAGC	1.0003	1.0207	0.9916	0	0	0	0.9916	0.50015	0.51035	0.333683
UGUGAG	0.9482	1.0034	1.061	0	0	0	1.061	0.4741	0.5017	0.339467
CAGGCU	1.0075	0.9867	1.0183	0	0	0	1.0183	0.50375	0.49335	0.3359
GGGCGG	1.0184	0.965	1.0287	0	0	0	1.0287	0.5092	0.4825	0.336733
CAGAUA	0.9881	1.0338	0.9898	0	0	0	0.9898	0.49405	0.5169	0.333458
GUUGAC	1.0062	0.9899	1.0155	0	0	0	1.0155	0.5031	0.49495	0.335592
GUUUUC	0.9884	0.972	1.0511	0	0	0	1.0511	0.4942	0.486	0.33855
AUGCAA	0.9809	1.0385	0.9919	0	0	0	0.9919	0.49045	0.51925	0.3336
GGUGGA	0.9676	0.9855	1.058	0	0	0	1.058	0.4838	0.49275	0.339092
GACGGC	1.0247	0.9661	1.0203	0	0	0	1.0203	0.51235	0.48305	0.33595
CGGGUC	1.026	0.9283	1.0568	0	0	0	1.0568	0.513	0.46415	0.338992
AAUUCA	0.9723	1.0577	0.981	0	0	0	0.981	0.48615	0.52885	0.332667
GAGCGG	1.0122	0.9776	1.0211	0	0	0	1.0211	0.5061	0.4888	0.336
UGAAGU	0.9793	1.0288	1.0026	0	0	0	1.0026	0.48965	0.5144	0.334442
AGCAAC	0.9913	1.0048	1.0146	0	0	0	1.0146	0.49565	0.5024	0.335442
CCAAAU	0.9781	1.0372	0.9952	0	0	0	0.9952	0.48905	0.5186	0.333808
AGGGAU	0.9903	0.991	1.029	0	0	0	1.029	0.49515	0.4955	0.336608
CAAUUC	0.9933	1.0186	0.9983	0	0	0	0.9983	0.49665	0.5093	0.334042
UUCAAG	0.9705	1.0351	1.0043	0	0	0	1.0043	0.48525	0.51755	0.334517
CUAGGC	1.0109	0.9853	1.0135	0	0	0	1.0135	0.50545	0.49265	0.335267
UGGUGC	1.0243	0.9713	1.0141	0	0	0	1.0141	0.51215	0.48565	0.335317
UAAGAG	0.9566	1.0651	0.9877	0	0	0	0.9877	0.4783	0.53255	0.333092
AAAUCG	0.9482	1.0298	1.0311	0	0	0	1.0311	0.4741	0.5149	0.336683
AAUCGA	0.9641	1.0286	1.0164	0	0	0	1.0164	0.48205	0.5143	0.335458
AGACGG	0.9871	0.9962	1.0258	0	0	0	1.0258	0.49355	0.4981	0.336242
CUAUGG	1.0272	1.0174	0.9644	0	0	0	0.9644	0.5136	0.5087	0.331117
UCACGA	0.9677	1.0144	1.0268	0	0	0	1.0268	0.48385	0.5072	0.336308
GGUUUC	0.9958	0.9823	1.0306	0	0	0	1.0306	0.4979	0.49115	0.336608
UAACCC	1.0405	0.9884	0.9797	0	0	0	0.9797	0.52025	0.4942	0.332358
UGGUGG	1.0164	0.9598	1.032	0	0	0	1.032	0.5082	0.4799	0.336683
UGUUCC	1.0309	0.9695	1.0077	0	0	0	1.0077	0.51545	0.48475	0.33465
UGAGUA	0.9816	1.0286	0.9971	0	0	0	0.9971	0.4908	0.5143	0.3337
GUGCUG	1.0165	0.974	1.0166	0	0	0	1.0166	0.50825	0.487	0.335308
GGGACU	1.004	0.9835	1.0195	0	0	0	1.0195	0.502	0.49175	0.335542
UCACCU	1.0246	0.9694	1.0128	0	0	0	1.0128	0.5123	0.4847	0.334967
UUUUCA	0.9625	1.0175	1.0267	0	0	0	1.0267	0.48125	0.50875	0.336117
UUCAGG	0.9913	0.9812	1.0342	0	0	0	1.0342	0.49565	0.4906	0.336742
AUAAAA	0.9063	1.1116	0.9886	0	0	0	0.9886	0.45315	0.5558	0.332925
AACGGA	0.9825	0.9986	1.0254	0	0	0	1.0254	0.49125	0.4993	0.335992
GGUAAA	0.9264	1.0468	1.033	0	0	0	1.033	0.4632	0.5234	0.3366
UCCAAC	1.0092	0.9879	1.0087	0	0	0	1.0087	0.5046	0.49395	0.334542
AGCCUC	0.994	0.9837	1.0281	0	0	0	1.0281	0.497	0.49185	0.336158
GAUAUA	0.9916	1.0644	0.9497	0	0	0	0.9497	0.4958	0.5322	0.329617
AAACAA	0.9077	1.0951	1.0026	0	0	0	1.0026	0.45385	0.54755	0.334
UUGGCU	1.041	0.9693	0.995	0	0	0	0.995	0.5205	0.48465	0.333358
UCCUAG	1.0202	0.9884	0.9966	0	0	0	0.9966	0.5101	0.4942	0.333483
CUGUAG	0.9973	0.9935	1.0143	0	0	0	1.0143	0.49865	0.49675	0.33495
UAGGCC	0.9918	0.9909	1.0223	0	0	0	1.0223	0.4959	0.49545	0.335608
GUGACC	1.0116	0.9757	1.0174	0	0	0	1.0174	0.5058	0.48785	0.335175
GUCCCC	1.0243	0.9477	1.0325	0	0	0	1.0325	0.51215	0.47385	0.336417
CGAUAA	0.9681	1.0403	0.996	0	0	0	0.996	0.48405	0.52015	0.333367
AACGCG	0.9916	0.9996	1.0131	0	0	0	1.0131	0.4958	0.4998	0.334783
AUGUGG	0.9812	1.0333	0.9897	0	0	0	0.9897	0.4906	0.51665	0.332825
ACUUGC	1.0193	0.9789	1.0059	0	0	0	1.0059	0.50965	0.48945	0.334167
GGAUGG	0.9893	0.973	1.0415	0	0	0	1.0415	0.49465	0.4865	0.337108
UGACUU	1.0029	1.0096	0.9912	0	0	0	0.9912	0.50145	0.5048	0.332908
GAUCUU	1.0168	0.9969	0.9899	0	0	0	0.9899	0.5084	0.49845	0.332792
UUGGUG	1.0348	0.9951	0.9734	0	0	0	0.9734	0.5174	0.49755	0.331392
UGCUAG	1.006	1.0075	0.9894	0	0	0	0.9894	0.503	0.50375	0.332692
CCGGUC	1.0148	0.9459	1.0421	0	0	0	1.0421	0.5074	0.47295	0.337075
GUGAAU	0.9538	1.016	1.0329	0	0	0	1.0329	0.4769	0.508	0.3363
UAGGGA	0.9863	0.9902	1.0261	0	0	0	1.0261	0.49315	0.4951	0.335725
GUAAGA	0.9496	1.0452	1.0077	0	0	0	1.0077	0.4748	0.5226	0.334183
CCUAUG	1.0298	0.992	0.9806	0	0	0	0.9806	0.5149	0.496	0.331917
GGGUAU	1.0086	0.9863	1.0074	0	0	0	1.0074	0.5043	0.49315	0.334142
GCGGCU	1.0146	0.9805	1.0072	0	0	0	1.0072	0.5073	0.49025	0.334125
UGGAAU	0.9854	1.0406	0.9754	0	0	0	0.9754	0.4927	0.5203	0.3314
AAGAUC	0.9758	1.0162	1.0085	0	0	0	1.0085	0.4879	0.5081	0.334083
GGACCA	0.9865	1.0119	1.002	0	0	0	1.002	0.49325	0.50595	0.333533
AAAGUU	0.9372	1.0442	1.0189	0	0	0	1.0189	0.4686	0.5221	0.334933
GGCGGC	1.0224	0.9485	1.0294	0	0	0	1.0294	0.5112	0.47425	0.335808
GGAUAC	1.0139	0.9909	0.9949	0	0	0	0.9949	0.50695	0.49545	0.332883
UAAAAG	0.9213	1.0825	0.9952	0	0	0	0.9952	0.46065	0.54125	0.33285
CGAACA	0.9594	1.0188	1.0208	0	0	0	1.0208	0.4797	0.5094	0.334983
UACGAU	0.9979	1.04	0.961	0	0	0	0.961	0.49895	0.52	0.329992
GGUUCA	0.972	1	1.0269	0	0	0	1.0269	0.486	0.5	0.335483
UAGCGA	1.0078	1.0136	0.9773	0	0	0	0.9773	0.5039	0.5068	0.331333
GCCUGU	1.0127	0.9669	1.0187	0	0	0	1.0187	0.50635	0.48345	0.33475
CUCUUG	0.989	0.9884	1.0209	0	0	0	1.0209	0.4945	0.4942	0.334933
UCCGUG	1.0218	0.9758	1.0001	0	0	0	1.0001	0.5109	0.4879	0.33315
GUGAGC	0.9922	0.9757	1.0293	0	0	0	1.0293	0.4961	0.48785	0.335542
GGCAAU	1.0021	0.9938	1.0007	0	0	0	1.0007	0.50105	0.4969	0.333108
AGGGUC	0.977	0.9852	1.0342	0	0	0	1.0342	0.4885	0.4926	0.335883
CCAUGC	1.0422	0.9568	0.9973	0	0	0	0.9973	0.5211	0.4784	0.3328
GCCGUG	1.0157	0.9602	1.0201	0	0	0	1.0201	0.50785	0.4801	0.334675
ACGACG	1.0103	0.9815	1.004	0	0	0	1.004	0.50515	0.49075	0.333317
CAGUGG	0.9828	0.9916	1.0212	0	0	0	1.0212	0.4914	0.4958	0.334733
GCAAUU	1.0031	1.0185	0.9739	0	0	0	0.9739	0.50155	0.50925	0.330783
UGGAGU	1	0.9886	1.0068	0	0	0	1.0068	0.5	0.4943	0.333517
ACGCGC	1.0193	0.9652	1.0105	0	0	0	1.0105	0.50965	0.4826	0.333792
UCAGGG	0.9739	0.9828	1.0382	0	0	0	1.0382	0.48695	0.4914	0.336092
UCGCGC	1.0071	0.9476	1.04	0	0	0	1.04	0.50355	0.4738	0.336225
GUCUUG	1.0046	0.9952	0.9948	0	0	0	0.9948	0.5023	0.4976	0.33245
CCUCCA	1.0355	0.9555	1.0033	0	0	0	1.0033	0.51775	0.47775	0.333133
CUGACU	1.0004	0.9827	1.0109	0	0	0	1.0109	0.5002	0.49135	0.333742
GGAUAG	1.0229	0.9752	0.9952	0	0	0	0.9952	0.51145	0.4876	0.332375
AUAGGC	0.9891	1.0041	1	0	0	0	1	0.49455	0.50205	0.332767
CUCUGG	1.0119	0.9512	1.03	0	0	0	1.03	0.50595	0.4756	0.335258
GCAGUU	1.0082	0.9929	0.9917	0	0	0	0.9917	0.5041	0.49645	0.332042
GGCGGA	0.9884	0.9758	1.0284	0	0	0	1.0284	0.4942	0.4879	0.335083
UCGCGG	1.0025	0.9552	1.0349	0	0	0	1.0349	0.50125	0.4776	0.335625
ACAAGG	0.9639	1.0061	1.0223	0	0	0	1.0223	0.48195	0.50305	0.33455
CCCAUC	1.0373	0.9389	1.0157	0	0	0	1.0157	0.51865	0.46945	0.333967
GGGUCA	1.005	0.9623	1.0246	0	0	0	1.0246	0.5025	0.48115	0.334708
GUCCAA	0.9688	0.9913	1.0317	0	0	0	1.0317	0.4844	0.49565	0.335292
UUAGAA	0.9433	1.0492	0.9988	0	0	0	0.9988	0.47165	0.5246	0.332508
GUUCCU	1.0227	0.962	1.0059	0	0	0	1.0059	0.51135	0.481	0.333042
CACAAA	0.9499	1.0322	1.0083	0	0	0	1.0083	0.47495	0.5161	0.333225
GCUGCC	1.0258	0.9601	1.004	0	0	0	1.004	0.5129	0.48005	0.332825
AGGUAC	1.0027	0.9709	1.0154	0	0	0	1.0154	0.50135	0.48545	0.3337
GACUUC	0.9949	0.9887	1.0053	0	0	0	1.0053	0.49745	0.49435	0.33285
CGGUUC	0.9851	0.9671	1.0367	0	0	0	1.0367	0.49255	0.48355	0.335467
GGAAUA	0.9563	1.044	0.9884	0	0	0	0.9884	0.47815	0.522	0.331425
UGACGU	0.9907	0.9955	1.0022	0	0	0	1.0022	0.49535	0.49775	0.33255
CUUGGA	0.9714	0.9869	1.03	0	0	0	1.03	0.4857	0.49345	0.334858
CUCCGC	1.0254	0.9393	1.0231	0	0	0	1.0231	0.5127	0.46965	0.334242
CGAAGU	0.9579	1.0048	1.0249	0	0	0	1.0249	0.47895	0.5024	0.334375
ACCCUA	1.0467	0.9728	0.968	0	0	0	0.968	0.52335	0.4864	0.329625
ACCCUC	1.0363	0.9468	1.0044	0	0	0	1.0044	0.51815	0.4734	0.332658
AACACG	0.9625	1.0108	1.014	0	0	0	1.014	0.48125	0.5054	0.333442
UGGCUA	1.0231	0.9885	0.9757	0	0	0	0.9757	0.51155	0.49425	0.33025
CACGCA	1.0094	0.9607	1.0169	0	0	0	1.0169	0.5047	0.48035	0.333658
UUCAGC	0.9969	0.9795	1.0103	0	0	0	1.0103	0.49845	0.48975	0.333083
CCUCGC	1.0197	0.944	1.0226	0	0	0	1.0226	0.50985	0.472	0.334075
CUGCCA	1.0107	0.9699	1.0055	0	0	0	1.0055	0.50535	0.48495	0.332633
GGUGAC	0.9857	0.9866	1.0137	0	0	0	1.0137	0.49285	0.4933	0.333308
ACGGGC	1.029	0.9639	0.993	0	0	0	0.993	0.5145	0.48195	0.331575
GUGAAC	0.9686	1.0038	1.0134	0	0	0	1.0134	0.4843	0.5019	0.333267
ACCUCC	1.0256	0.9524	1.0075	0	0	0	1.0075	0.5128	0.4762	0.33275
GUGAGG	0.9578	0.997	1.0306	0	0	0	1.0306	0.4789	0.4985	0.334667
CUUCCA	1.0248	0.9525	1.0078	0	0	0	1.0078	0.5124	0.47625	0.332742
UCGACA	0.9859	0.9851	1.0139	0	0	0	1.0139	0.49295	0.49255	0.333233
UUUCGC	1.0074	0.9773	1.0001	0	0	0	1.0001	0.5037	0.48865	0.332075
GUGCCA	0.9965	0.9766	1.0117	0	0	0	1.0117	0.49825	0.4883	0.333042
GACCAU	1.0031	0.9991	0.9824	0	0	0	0.9824	0.50155	0.49955	0.330583
GAACUC	0.9734	0.994	1.0164	0	0	0	1.0164	0.4867	0.497	0.33335
CCACAA	0.9884	0.991	1.0041	0	0	0	1.0041	0.4942	0.4955	0.3323
GGACAA	0.9572	1.0102	1.0158	0	0	0	1.0158	0.4786	0.5051	0.33325
ACCGGU	0.9973	0.9592	1.0266	0	0	0	1.0266	0.49865	0.4796	0.334142
CUCGGC	1.0146	0.9563	1.0122	0	0	0	1.0122	0.5073	0.47815	0.332942
ACACGG	0.9975	0.984	1.0013	0	0	0	1.0013	0.49875	0.492	0.332008
CGGACU	1.0098	0.9714	1.0016	0	0	0	1.0016	0.5049	0.4857	0.332033
GUGGAG	1.0023	0.95	1.0305	0	0	0	1.0305	0.50115	0.475	0.334442
CUCGCC	1.0096	0.952	1.0208	0	0	0	1.0208	0.5048	0.476	0.3336
UCCACA	1.0065	0.9709	1.0047	0	0	0	1.0047	0.50325	0.48545	0.332233
GCUUGG	0.9994	0.9684	1.014	0	0	0	1.014	0.4997	0.4842	0.332983
GCUCGG	1.0159	0.9385	1.0268	0	0	0	1.0268	0.50795	0.46925	0.334
AGCCAU	0.9992	0.9881	0.9939	0	0	0	0.9939	0.4996	0.49405	0.331258
CACAGC	0.997	0.9695	1.0145	0	0	0	1.0145	0.4985	0.48475	0.332958
CGUUCC	1.0132	0.9483	1.0195	0	0	0	1.0195	0.5066	0.47415	0.333375
CAACGC	1.0073	0.9681	1.0054	0	0	0	1.0054	0.50365	0.48405	0.332183
CGGGCU	1.0336	0.9463	1.0009	0	0	0	1.0009	0.5168	0.47315	0.331808
GUUGAA	0.966	0.9983	1.0165	0	0	0	1.0165	0.483	0.49915	0.333108
UGCGUG	0.981	0.9912	1.0086	0	0	0	1.0086	0.4905	0.4956	0.33245
GCAUGC	1.0066	0.9743	0.9998	0	0	0	0.9998	0.5033	0.48715	0.331708
GGUCCA	0.9884	0.9724	1.0199	0	0	0	1.0199	0.4942	0.4862	0.333383
UCAGGA	0.9767	1.0065	0.9974	0	0	0	0.9974	0.48835	0.50325	0.3315
CAGACU	0.9905	0.9944	0.9957	0	0	0	0.9957	0.49525	0.4972	0.331358
AGGUGC	0.9983	0.9745	1.0071	0	0	0	1.0071	0.49915	0.48725	0.33225
UCAGAU	0.9594	0.9978	1.0224	0	0	0	1.0224	0.4797	0.4989	0.3335
CCGUGC	1.0118	0.9346	1.0329	0	0	0	1.0329	0.5059	0.4673	0.33435
UUAGAG	0.9817	1.014	0.9833	0	0	0	0.9833	0.49085	0.507	0.330192
GUUCAG	0.9713	0.9807	1.0266	0	0	0	1.0266	0.48565	0.49035	0.333767
ACUGUG	0.9635	1.0163	0.9986	0	0	0	0.9986	0.48175	0.50815	0.331417
UGCCGG	1.0287	0.9565	0.9932	0	0	0	0.9932	0.51435	0.47825	0.330967
GCUCCA	1.0142	0.9687	0.9952	0	0	0	0.9952	0.5071	0.48435	0.331108
UCGACC	1.016	0.9696	0.9924	0	0	0	0.9924	0.508	0.4848	0.330867
ACACAG	0.9896	0.9978	0.9903	0	0	0	0.9903	0.4948	0.4989	0.330667
UGCUGG	1.0044	0.9616	1.0115	0	0	0	1.0115	0.5022	0.4808	0.332417
CGCGGU	0.994	0.9396	1.0438	0	0	0	1.0438	0.497	0.4698	0.3351
GCGUAG	0.9806	0.9858	1.0109	0	0	0	1.0109	0.4903	0.4929	0.33235
ACAAGC	0.9816	0.9934	1.0016	0	0	0	1.0016	0.4908	0.4967	0.331517
GGACCG	0.9932	0.9621	1.0212	0	0	0	1.0212	0.4966	0.48105	0.333142
UCCAGU	1.0122	0.9591	1.0051	0	0	0	1.0051	0.5061	0.47955	0.331792
CAACGG	0.9828	0.9824	1.0107	0	0	0	1.0107	0.4914	0.4912	0.332217
UGCGGU	0.994	0.9649	1.017	0	0	0	1.017	0.497	0.48245	0.332742
ACAGUG	0.9868	1.003	0.9858	0	0	0	0.9858	0.4934	0.5015	0.330117
AGUCCC	1.011	0.9564	1.008	0	0	0	1.008	0.5055	0.4782	0.33195
AGGGCU	1.0191	0.9724	0.9838	0	0	0	0.9838	0.50955	0.4862	0.329925
UUUCCU	1.0235	0.9605	0.9913	0	0	0	0.9913	0.51175	0.48025	0.33055
CUUCCG	1.0163	0.9417	1.0173	0	0	0	1.0173	0.50815	0.47085	0.332717
AACAAA	0.9097	1.0745	0.991	0	0	0	0.991	0.45485	0.53725	0.330517
UAGGGC	0.9938	0.9739	1.0073	0	0	0	1.0073	0.4969	0.48695	0.331858
ACAGCG	0.9744	0.9889	1.0115	0	0	0	1.0115	0.4872	0.49445	0.332192
CUCCAC	1.0179	0.9641	0.9926	0	0	0	0.9926	0.50895	0.48205	0.3306
UUACCC	1.0315	0.9785	0.9641	0	0	0	0.9641	0.51575	0.48925	0.328183
UGCACG	1.0021	0.9751	0.9969	0	0	0	0.9969	0.50105	0.48755	0.330917
ACGCUG	1.0052	0.9623	1.0059	0	0	0	1.0059	0.5026	0.48115	0.331608
GUGGUG	0.9769	0.9854	1.0107	0	0	0	1.0107	0.48845	0.4927	0.331975
GGUCAG	0.9802	0.9694	1.0234	0	0	0	1.0234	0.4901	0.4847	0.333033
CGGCGG	1.0082	0.9364	1.0279	0	0	0	1.0279	0.5041	0.4682	0.333367
GCUAGG	0.9885	0.9678	1.0161	0	0	0	1.0161	0.49425	0.4839	0.332375
GCUGUG	0.9925	0.986	0.9938	0	0	0	0.9938	0.49625	0.493	0.330508
GAUCUA	0.9923	1.0021	0.9777	0	0	0	0.9777	0.49615	0.50105	0.32915
CUGUUG	0.9837	0.9729	1.0153	0	0	0	1.0153	0.49185	0.48645	0.332267
GAAGUA	0.9411	1.0349	0.9958	0	0	0	0.9958	0.47055	0.51745	0.330633
GUCCUG	1.0178	0.9546	0.9993	0	0	0	0.9993	0.5089	0.4773	0.330917
GCCGGU	0.9979	0.9367	1.0369	0	0	0	1.0369	0.49895	0.46835	0.334033
GAGCUA	1.0021	0.9822	0.987	0	0	0	0.987	0.50105	0.4911	0.329858
UUCUCG	0.9912	0.9718	1.0081	0	0	0	1.0081	0.4956	0.4859	0.3316
UAGCAC	1.0019	0.9879	0.9805	0	0	0	0.9805	0.50095	0.49395	0.329233
UCUCUG	1.005	0.9413	1.0237	0	0	0	1.0237	0.5025	0.47065	0.332808
CCACUC	1.0157	0.9554	0.9986	0	0	0	0.9986	0.50785	0.4777	0.330692
ACGAAC	0.9621	0.9993	1.0081	0	0	0	1.0081	0.48105	0.49965	0.331467
GCAACG	0.9919	0.9857	0.9916	0	0	0	0.9916	0.49595	0.49285	0.330067
AUGGUU	0.977	0.9764	1.0153	0	0	0	1.0153	0.4885	0.4882	0.332
[truncated: 2,098 more rows]

## Sheet: P_vivax_IESI2
P_vivax	Replicate_1			Replicate_2
9-mer	50_nM	100_nM	500_nM	50_nM	100_nM	500_nM	Average_50nM	Average_100nM	Average_500nM	Average_all
GAUACCCGA	4.1359	4.2688	4.1313	4.7404	4.8744	3.5379	4.28145	4.43815	4.5716	3.8346
CACUCGAGA	3.8799	4.4533	4.1552	4.6178	4.4713	3.7672	4.22412	4.24885	4.4623	3.9612
GCACUCGAG	3.8962	4.6515	4.1064	4.3531	4.4617	3.5892	4.17635	4.12465	4.5566	3.8478
CACCUGAGA	3.5527	3.5236	3.5361	4.7676	4.3416	3.5572	3.8798	4.16015	3.9326	3.54665
CAUCCGAGG	3.5845	3.3729	3.1044	4.4952	2.8587	3.5706	3.49772	4.03985	3.1158	3.3375
ACACUCGAG	3.2603	3.6642	3.1851	3.827	4.2296	3.4706	3.60613	3.54365	3.9469	3.32785
CUCGAGAGC	2.9959	2.9265	3.0539	3.1356	3.0835	3.4176	3.10217	3.06575	3.005	3.23575
UGACGCUCG	2.628	3.228	3.1082	2.9947	3.4073	3.2963	3.11042	2.81135	3.31765	3.20225
CAACCCGAG	3.241	2.9934	2.4928	3.3875	2.9031	3.862	3.14663	3.31425	2.94825	3.1774
GACAUCCGA	2.9759	3.0143	2.9559	3.8722	3.3477	3.3557	3.25362	3.42405	3.181	3.1558
UGAUACCCG	2.7573	3.1992	3.0821	3.4863	3.1267	3.153	3.1341	3.1218	3.16295	3.11755
UGACAUCCG	2.9429	2.9797	3.3754	4.3459	4.0456	2.8222	3.41862	3.6444	3.51265	3.0988
CCCGAGAGA	3.2497	3.2719	3.0248	3.2352	2.8098	3.1666	3.12633	3.24245	3.04085	3.0957
ACGCCCGAG	2.9237	2.7986	3.3433	2.4167	3.6713	2.8466	3.00003	2.6702	3.23495	3.09495
GACACCCGC	3.2743	3.752	3.2863	2.9906	2.9153	2.8924	3.18515	3.13245	3.33365	3.08935
CUACCCGAG	3.0024	3.0948	3.1947	3.2102	3.0501	2.9555	3.08462	3.1063	3.07245	3.0751
GGCACCGAG	3.1581	3.1744	3.0711	3.0934	2.9533	3.0663	3.0861	3.12575	3.06385	3.0687
GCACCCGAA	2.6588	3.1182	3.0381	3.0422	3.3596	3.0392	3.04268	2.8505	3.2389	3.03865
AAGGCACCC	3.0804	2.9254	3.0429	2.7712	3.1668	3.0276	3.00238	2.9258	3.0461	3.03525
UCGGGAUGG	3.619	2.9513	3.0089	2.646	3.1427	3.0383	3.0677	3.1325	3.047	3.0236
GAUACCCGG	2.875	2.7668	2.9355	2.7908	2.9096	3.104	2.89695	2.8329	2.8382	3.01975
GCACCUGGG	2.7392	2.6212	2.6834	3.0111	2.5655	3.3491	2.82825	2.87515	2.59335	3.01625
GACACCUGG	2.9931	3.592	2.9473	3.6886	2.9031	3.0775	3.20027	3.34085	3.24755	3.0124
GCCCGAAGA	2.6746	2.9882	2.9978	2.8415	3.3694	3.0269	2.98307	2.75805	3.1788	3.01235
ACACCUGAG	2.7142	3.1319	2.7686	3.4267	2.9396	3.2485	3.03825	3.07045	3.03575	3.00855
CCCGAGUUU	2.7819	2.8657	2.597	4.0355	2.4739	3.3168	3.0118	3.4087	2.6698	2.9569
CACCCGGAA	2.8339	3.292	2.6467	3.1586	3.4207	3.2644	3.10272	2.99625	3.35635	2.95555
GUGACACCC	3.6702	4.063	3.2981	3.5177	3.3282	2.6029	3.41335	3.59395	3.6956	2.9505
ACACCCGGA	2.9013	3.1798	2.9441	2.8819	3.5419	2.9433	3.06538	2.8916	3.36085	2.9437
CGCUCGGGA	3.1575	2.8263	3.0736	3.322	2.8138	2.8109	3.00068	3.23975	2.82005	2.94225
GACCCGAGA	3.325	2.7397	3.1466	2.8185	3.2069	2.7315	2.9947	3.07175	2.9733	2.93905
AGACACCCG	2.9453	3.5214	3.09	3.1206	2.4489	2.7795	2.98428	3.03295	2.98515	2.93475
GCGCCUGAG	3.0637	2.6131	2.7164	3.4963	2.4586	3.153	2.91685	3.28	2.53585	2.9347
ACAUCCGAG	2.742	2.6234	2.5446	3.7505	2.9931	3.3122	2.9943	3.24625	2.80825	2.9284
CUGGCACCC	2.8186	3.6481	3.1761	2.7652	2.537	2.6752	2.9367	2.7919	3.09255	2.92565
UUGGCACCU	2.5919	3.2833	3.5104	2.4601	2.5655	2.3389	2.79168	2.526	2.9244	2.92465
CUUGACGCC	2.4745	3.0033	2.6146	2.0171	2.6313	3.2338	2.66243	2.2458	2.8173	2.9242
CCCGAAGAG	3.226	3.1972	2.8863	3.0704	2.9589	2.9504	3.0482	3.1482	3.07805	2.91835
GCCACCCGA	3.1433	3.0743	2.9086	3.3755	3.1641	2.9198	3.0976	3.2594	3.1192	2.9142
ACCCGAGAU	2.9959	2.9442	3.3111	3.4107	3.1575	2.5136	3.0555	3.2033	3.05085	2.91235
GGCACCUGG	2.9436	2.8416	2.9592	2.9379	2.3922	2.8508	2.82088	2.94075	2.6169	2.905
UGGCACCUG	2.5419	2.738	2.7947	2.3242	2.5254	3.0097	2.65565	2.43305	2.6317	2.9022
CGGGAGGAG	3.0381	2.7668	3.0956	3.2314	3.1831	2.6752	2.99837	3.13475	2.97495	2.8854
CUGCCCGAG	3.4466	2.9853	2.4195	2.5971	3.4432	3.3491	3.04013	3.02185	3.21425	2.8843
ACCCGAGUC	2.6568	2.5939	2.8905	3.0692	3.6345	2.8663	2.95187	2.863	3.1142	2.8784
CCCGAGGAC	3.3159	3.2598	3.1847	3.2798	3.1848	2.5698	3.13247	3.29785	3.2223	2.87725
GCCCGGUGA	3.0706	2.9136	3.3053	2.7956	2.9153	2.4234	2.90397	2.9331	2.91445	2.86435
GACGCCUGA	2.9145	3.1066	2.9473	3.4126	2.7455	2.7758	2.98372	3.16355	2.92605	2.86155
GCCCGAGCG	2.8622	2.827	2.8527	3.0471	3.6252	2.8663	3.01342	2.95465	3.2261	2.8595
CGAUACCCG	3.0026	2.7043	2.8191	2.5697	2.6959	2.8955	2.78118	2.78615	2.7001	2.8573
AACCCGAGA	2.7573	2.3979	2.6189	3.3373	2.651	3.0829	2.80755	3.0473	2.52445	2.8509
GUCACCCGG	3.1201	3.1552	2.8594	2.9735	2.633	2.806	2.92453	3.0468	2.8941	2.8327
UCACCUGAG	2.742	2.7258	2.5817	3.242	3.9623	3.0829	3.05612	2.992	3.34405	2.8323
UGACACCCA	2.4619	3.1127	2.8358	3.0649	3.1611	2.8254	2.9103	2.7634	3.1369	2.8306
AAGACACCC	2.7828	3.1654	2.8583	2.4898	3.1356	2.7885	2.87007	2.6363	3.1505	2.8234
GACACCCAA	2.4468	2.6921	2.5451	2.5642	2.7966	3.0987	2.69058	2.5055	2.74435	2.8219
ACACCCGUG	2.9704	2.4482	2.8114	2.9386	2.7288	2.8142	2.78527	2.9545	2.5885	2.8128
CGGAGGAAG	2.4933	2.708	2.9698	2.8301	2.9203	2.6346	2.75935	2.6617	2.81415	2.8022
GGCGCCCGA	2.6641	2.9912	2.8689	2.9766	2.6348	2.7269	2.81042	2.82035	2.813	2.7979
AGGCACCUG	2.8952	2.6931	2.7749	2.3171	2.4629	2.8205	2.66062	2.60615	2.578	2.7977
CGCUCGAGA	2.7573	2.8986	2.587	3.1671	2.8404	3.0028	2.87553	2.9622	2.8695	2.7949
GAUGCCCGA	2.828	3.0033	3.1075	3.264	3.4536	2.4695	3.02098	3.046	3.22845	2.7885
GGUUCUGGG	3.5759	2.9398	2.9776	1.8773	1.6836	2.5797	2.60565	2.7266	2.3117	2.77865
CGACACCCU	2.5894	2.7432	2.7432	2.5489	2.3846	2.8075	2.63613	2.56915	2.5639	2.77535
GCAGGUGGG	2.0979	2.1654	3.0041	2.3631	2.2309	2.5423	2.40062	2.2305	2.19815	2.7732
GACGCCCGG	3.0724	3.7418	2.8179	2.7788	2.4555	2.7189	2.93088	2.9256	3.09865	2.7684
ACCCGAGGG	2.8219	3.0262	2.4552	2.7265	2.8461	3.0813	2.8262	2.7742	2.93615	2.76825
GUCCGAGAA	3.0192	2.6746	2.4406	3.1752	2.9503	3.0956	2.89258	3.0972	2.81245	2.7681
GCACCUGAG	2.6424	3.2024	3.0182	3.6552	2.8149	2.516	2.97485	3.1488	3.00865	2.7671
CAUCCGAGA	2.4582	2.7842	2.4601	3.1574	2.9769	3.0502	2.8145	2.8078	2.88055	2.75515
AAGCACCCG	2.8768	2.6193	2.7415	2.8797	2.4116	2.767	2.71598	2.87825	2.51545	2.75425
GACCCGAGC	2.5207	2.7668	2.5573	2.8606	2.6421	2.9433	2.71513	2.69065	2.70445	2.7503
UCGCACCCG	3.1653	3.1809	2.5416	3.4152	2.932	2.9482	3.03053	3.29025	3.05645	2.7449
CCCGAGGAA	3.1881	2.7668	2.4552	2.4434	2.4052	3.0335	2.71537	2.81575	2.586	2.74435
CCCGAGCGU	2.4759	3.0303	2.678	2.5979	2.5393	2.8078	2.6882	2.5369	2.7848	2.7429
UUGCACCCG	2.6122	2.7183	2.8594	2.9359	2.8018	2.625	2.75877	2.77405	2.76005	2.7422
UCGGGAGGG	2.7956	3.228	2.5539	2.8606	2.3517	2.93	2.78663	2.8281	2.78985	2.74195
GCUCGAGAA	2.7879	3.3407	2.8232	2.9877	3.4207	2.6243	2.99742	2.8878	3.3807	2.72375
UACACCCGA	2.6147	3.0213	2.7236	2.614	3.3617	2.7082	2.84058	2.61435	3.1915	2.7159
GGCACCCAC	2.7805	2.8497	2.6953	2.8284	2.4646	2.7311	2.72493	2.80445	2.65715	2.7132
GGCACCCGC	2.7717	3.055	2.4378	2.7712	2.8862	2.9858	2.81795	2.77145	2.9706	2.7118
GUGGGAGAG	2.2403	2.5363	2.6467	2.3838	2.4586	2.7708	2.50608	2.31205	2.49745	2.70875
CGGUGUCGG	3.1512	2.4594	2.4676	3.2692	2.6266	2.9482	2.82037	3.2102	2.543	2.7079
UGCGCCCGA	2.7573	3.2842	2.6909	3.2443	3.3164	2.7125	3.00093	3.0008	3.3003	2.7017
CACCUGAGG	3.0876	3.324	2.5597	3.4267	2.6724	2.8425	2.98548	3.25715	2.9982	2.7011
AGGGGGGUU	2.4126	1.9022	2.8209	1.8773	1.9241	2.5797	2.2528	2.14495	1.91315	2.7003
UGGCACCCA	2.6611	3.4532	2.8379	3.0269	2.9533	2.5597	2.91535	2.844	3.20325	2.6988
CACCUGGGA	2.8492	3.4432	2.4146	2.8288	3.3637	2.9555	2.97583	2.839	3.40345	2.68505
ACCCGAGGA	3.325	3.011	2.2616	3.4495	2.6032	3.1024	2.95878	3.38725	2.8071	2.682
ACCUGAGGG	2.538	2.704	2.4694	2.1779	2.5946	2.8924	2.56272	2.35795	2.6493	2.6809
GAUGCCCGG	3.0158	3.6891	3.0298	2.8159	2.4853	2.3289	2.89413	2.91585	3.0872	2.67935
GGGUUGGGG	2.3552	2.5363	3.0646	2.1454	1.3896	2.2931	2.29737	2.2503	1.96295	2.67885
GCAUCCGAG	2.737	3.4179	2.5566	3.7019	3.3955	2.7989	3.1013	3.21945	3.4067	2.67775
GAGGAUGGA	3.0254	3.4073	3.1575	3.0195	2.6011	2.1975	2.90138	3.02245	3.0042	2.6775
CCACCUGAG	3.0796	2.8986	2.7137	3.4921	2.982	2.6355	2.96692	3.28585	2.9403	2.6746
GCCCGAGUA	2.7978	2.8753	2.3354	2.6502	2.7541	3.0012	2.73567	2.724	2.8147	2.6683
ACUCGAGAG	2.5033	2.3947	2.4781	2.986	2.813	2.8563	2.6719	2.74465	2.60385	2.6672
CCUGAGAAG	3.033	2.6746	2.6245	3.5185	3.0529	2.7058	2.93488	3.27575	2.86375	2.66515
ACCCGAGAC	2.444	2.465	2.8266	2.1844	2.6588	2.5015	2.51338	2.3142	2.5619	2.66405
CAGCACCCG	3.0217	3.2722	2.37	2.6451	3.1981	2.9527	2.90997	2.8334	3.23515	2.66135
UCGACACCC	2.3917	3.0463	2.7607	2.3621	2.7793	2.5536	2.64895	2.3769	2.9128	2.65715
GCACACCCG	3.2996	3.1972	3.0646	3.0704	3.2496	2.2472	3.02143	3.185	3.2234	2.6559
GAAACCCGA	2.6111	2.1869	2.6784	2.9256	2.7501	2.6058	2.62632	2.76835	2.4685	2.6421
AACACCCGG	2.6666	2.7183	2.7934	2.3336	2.8187	2.4892	2.63663	2.5001	2.7685	2.6413
GGCACCGGG	2.7936	3.0581	2.7714	3.1241	2.9368	2.5043	2.86472	2.95885	2.99745	2.63785
CACCCUGGG	3.0575	2.4098	2.3322	2.7452	2.731	2.9403	2.70267	2.90135	2.5704	2.63625
CGGGAGAAG	3.087	2.7668	2.7982	2.5807	3.2069	2.4675	2.81785	2.83385	2.98685	2.63285
UCUGUUGGG	2.5951	2.2243	2.9008	3.3654	3.471	2.3605	2.81952	2.98025	2.84765	2.63065
CCGGGAAGA	2.6645	2.7846	2.5878	3.1081	2.3435	2.6679	2.69273	2.8863	2.56405	2.62785
UGCCCGAGG	3.2679	2.8352	2.786	2.5957	3.4682	2.4629	2.90265	2.9318	3.1517	2.62445
GGGAAGGAU	2.9149	2.6878	2.7224	3.024	2.3456	2.5224	2.70285	2.96945	2.5167	2.6224
GCCCGGAGA	2.7963	3.2889	2.3655	3.1035	2.9043	2.8772	2.88928	2.9499	3.0966	2.62135
AUGGCACCC	2.9641	2.6516	2.8627	3.1109	2.9183	2.3791	2.81445	3.0375	2.78495	2.6209
CGCCCGAGC	2.9031	2.7314	2.5717	3.2732	3.6016	2.6679	2.95815	3.08815	3.1665	2.6198
GCACCCGCG	2.7467	2.852	2.7518	2.8166	2.7628	2.4871	2.73617	2.78165	2.8074	2.61945
AAACCCGAG	2.2518	2.1766	2.2511	2.7462	2.7707	2.981	2.52957	2.499	2.47365	2.61605
GACACCCUG	2.7327	2.8986	2.791	2.7329	2.7258	2.4364	2.71957	2.7328	2.8122	2.6137
CGGCGCCCG	2.8114	2.8211	2.786	2.7204	2.2637	2.428	2.63843	2.7659	2.5424	2.607
CACCCGGAG	3.008	3.6723	2.857	3.0166	3.1252	2.3556	3.00578	3.0123	3.39875	2.6063
AAGCCCGAG	2.3983	3.055	2.6293	2.7414	2.9664	2.5797	2.72835	2.56985	3.0107	2.6045
CACCCGAAA	2.6414	2.8986	2.6479	3.1731	2.9967	2.5532	2.81848	2.90725	2.94765	2.60055
GGCCCGAGA	2.9662	2.8507	2.1782	2.9906	2.5266	3.0227	2.75583	2.9784	2.68865	2.60045
GAUCCCGAG	2.5885	2.8798	2.2004	2.1308	3.1938	2.995	2.66472	2.35965	3.0368	2.5977
UGACCCGAG	2.2628	1.9849	2.1986	2.3631	2.5934	2.991	2.39897	2.31295	2.28915	2.5948
UGGCACCCU	2.6711	2.9974	2.9253	3.2628	2.6457	2.2572	2.79325	2.96695	2.82155	2.59125
GAGCGGGUG	2.7873	2.9673	2.5801	2.1143	3.0117	2.5922	2.67548	2.4508	2.9895	2.58615
GCACCCGGU	2.597	3.0886	2.3714	2.3949	3.3709	2.7997	2.77042	2.49595	3.22975	2.58555
GCUCGAGAG	2.3945	2.961	2.4854	3.3499	2.6668	2.6853	2.75715	2.8722	2.8139	2.58535
CGACGCCCG	2.9031	3.5295	2.7325	2.6955	2.6642	2.4254	2.82503	2.7993	3.09685	2.57895
CACCCGUGA	2.6999	2.9359	2.8975	2.9559	2.7151	2.2549	2.7432	2.8279	2.8255	2.5762
CGAGCCCGG	2.9903	2.8058	2.7782	2.1958	2.5474	2.3738	2.61522	2.59305	2.6766	2.576
GAACCCGAG	2.691	2.8378	2.8128	2.7781	3.0095	2.3372	2.7444	2.73455	2.92365	2.575
CCGCCCGAG	2.9296	2.82	2.6521	3.4107	3.0589	2.4915	2.8938	3.17015	2.93945	2.5718
CCCGAGUCU	2.464	2.4332	2.3118	2.2519	2.5109	2.8297	2.46692	2.35795	2.47205	2.57075
GAGACACCC	2.4457	3.0069	2.3929	2.4687	2.7588	2.7485	2.63692	2.4572	2.88285	2.5707
GGAGCCCGA	3.2597	2.8606	2.4791	3.0303	3.0438	2.6623	2.8893	3.145	2.9522	2.5707
UGCCCGAGA	2.3793	2.5883	2.5074	2.9529	2.4827	2.6259	2.58942	2.6661	2.5355	2.56665
AGUCACCCG	2.7053	2.8364	2.2551	2.2129	2.5897	2.8772	2.57943	2.4591	2.71305	2.56615
CACCCGUGG	2.7448	2.4147	2.4011	2.4445	2.4022	2.7308	2.52302	2.59465	2.40845	2.56595
ACCUGAGAG	2.7573	2.4936	2.7087	3.3903	2.8981	2.4205	2.77808	3.0738	2.69585	2.5646
CGCGAGAGA	2.4376	2.446	2.6528	2.4253	2.1565	2.4759	2.43235	2.43145	2.30125	2.56435
GCCUGAGAA	2.8698	2.7668	2.388	3.2692	3.0891	2.7376	2.85342	3.0695	2.92795	2.5628
ACCUGGGAA	2.2977	2.5727	2.4488	2.3336	2.7905	2.6752	2.51975	2.31565	2.6816	2.562
GCCCGAGAC	2.8814	2.6562	2.7582	3.4327	2.5398	2.3619	2.7717	3.15705	2.598	2.56005
CGACCCGAG	2.9296	2.7668	2.6418	2.2987	2.4281	2.4773	2.59038	2.61415	2.59745	2.55955
CCCGGGUGG	2.5275	2.5363	2.5074	2.1057	1.9954	2.6116	2.38065	2.3166	2.26585	2.5595
GGGAGAGAG	2.4225	2.8459	2.2686	2.7788	2.1623	2.85	2.55468	2.60065	2.5041	2.5593
AGGCGCCCG	3.3825	2.4237	2.6629	2.6277	2.3567	2.4531	2.6511	3.0051	2.3902	2.558
GCGCCCGAA	2.6441	2.9733	2.7694	3.1168	2.7187	2.3444	2.76112	2.88045	2.846	2.5569
AAACACCCG	2.5752	3.054	2.7124	2.3613	2.7107	2.4012	2.6358	2.46825	2.88235	2.5568
GCCACCCGG	2.5896	2.9289	2.7107	2.706	3.2589	2.4015	2.76593	2.6478	3.0939	2.5561
CGAUGCCCG	2.647	2.8775	2.6746	2.7748	2.9247	2.4307	2.72155	2.7109	2.9011	2.55265
GACACCCGU	3.0706	3.0743	2.7354	3.0773	2.3711	2.3626	2.78188	3.07395	2.7227	2.549
CCGGCCGAG	2.5098	2.4712	2.5824	2.8239	2.4339	2.5136	2.5558	2.66685	2.45255	2.548
GGCACUCGA	2.6336	3.4763	2.7432	3.0806	3.1575	2.3519	2.90718	2.8571	3.3169	2.54755
GGUCCGAGA	2.9564	3.0538	2.4703	3.0195	2.5085	2.6243	2.77213	2.98795	2.78115	2.5473
GGUCGCGGG	3.1512	2.7229	2.4676	3.2011	2.5655	2.6207	2.78817	3.17615	2.6442	2.54415
GACGCCCGA	2.256	2.7459	2.6594	2.243	2.653	2.4234	2.49678	2.2495	2.69945	2.5414
GAGAGCCCG	2.8178	3.317	2.5661	3.0613	2.678	2.5143	2.82575	2.93955	2.9975	2.5402
AACCCGAGG	2.691	2.2702	2.411	2.668	2.2941	2.6679	2.50037	2.6795	2.28215	2.53945
GACCCCUGG	2.4572	2.7668	2.5271	2.3221	2.1429	2.5359	2.45867	2.38965	2.45485	2.5315
CCCCGUGGG	2.6402	2.6624	2.744	2.1859	2.2993	2.3147	2.47442	2.41305	2.48085	2.52935
GCACCCAGA	2.6822	2.4746	2.5488	3.1721	3.0354	2.5088	2.73698	2.92715	2.755	2.5288
AGAUGCCCG	2.7894	3.2387	2.6824	2.3949	2.834	2.3731	2.71875	2.59215	3.03635	2.52775
ACACCCGCG	2.7137	3.0237	2.8037	3.0778	2.8091	2.2495	2.77958	2.89575	2.9164	2.5266
GACAUCCGG	2.6159	3.027	2.8075	3.1173	3.2233	2.2343	2.83755	2.8666	3.12515	2.5209
CCCGAGGAG	2.1714	3.0435	2.3452	3.0751	2.0845	2.6944	2.56902	2.62325	2.564	2.5198
AGCACCCGA	2.6684	2.8561	2.467	2.7914	2.7724	2.5705	2.68763	2.7299	2.81425	2.51875
CCGGGAAGG	2.5555	2.5644	2.5482	2.6164	2.2839	2.4888	2.50953	2.58595	2.42415	2.5185
UACCCGAGA	2.4231	2.8227	3.09	2.4705	2.6044	1.9456	2.55938	2.4468	2.71355	2.5178
CGCCCGAAA	2.5992	2.9445	2.5458	3.018	2.895	2.4824	2.74748	2.8086	2.91975	2.5141
CCGAAGAGA	2.5638	2.5322	2.4195	2.6473	2.8468	2.6048	2.6024	2.60555	2.6895	2.51215
UUGACGCCC	2.2543	3.3401	2.5074	2.9766	2.7735	2.51	2.72698	2.61545	3.0568	2.5087
GGCUCGAGA	2.7894	2.7025	2.488	2.5612	2.0285	2.5064	2.51267	2.6753	2.3655	2.4972
CCACCCGAC	2.6657	2.5429	2.4301	2.8606	2.7434	2.5582	2.63348	2.76315	2.64315	2.49415
AGCCCGAGU	2.2494	2.9853	1.9356	3.0864	2.8018	3.0474	2.68432	2.6679	2.89355	2.4915
ACCCGAGAG	2.632	2.4315	2.3048	3.0339	2.6821	2.6752	2.62658	2.83295	2.5568	2.49
CGACACCCA	2.4126	2.6855	2.5402	2.4259	2.3391	2.4392	2.47375	2.41925	2.5123	2.4897
CUGACACCC	2.2173	3.3356	2.6467	2.7414	2.1165	2.3313	2.5648	2.47935	2.72605	2.489
GCACCCGGA	2.3651	3.0372	2.5651	2.466	2.6097	2.4117	2.5758	2.41555	2.82345	2.4884
CCUUGACGC	2.7273	2.9072	2.5074	3.1404	2.5934	2.4675	2.72387	2.93385	2.7503	2.48745
GCCCGAGCC	2.3607	2.83	2.5074	2.6647	2.5128	2.4658	2.5569	2.5127	2.6714	2.4866
ACCCGAGCC	2.3868	2.6977	2.403	2.6997	2.5655	2.5654	2.55302	2.54325	2.6316	2.4842
CCUUCGGGG	2.1637	2.4594	2.5746	2.1454	1.9598	2.3886	2.28192	2.15455	2.2096	2.4816
GGACCCGAG	2.9927	2.5194	2.3036	2.9304	3.0974	2.6566	2.75002	2.96155	2.8084	2.4801
GAGGGGGUG	1.9229	2.3785	2.3652	2.4089	1.9579	2.5948	2.27137	2.1659	2.1682	2.48
GCUGGCUCG	2.8952	2.3979	2.5313	2.2067	2.1257	2.4241	2.43015	2.55095	2.2618	2.4777
CCCGGGGAG	2.1563	2.4594	2.2181	2.4205	2.2695	2.734	2.3763	2.2884	2.36445	2.47605
CACCCGACC	2.6622	2.7223	2.6458	2.8704	2.8309	2.301	2.6721	2.7663	2.7766	2.4734
GCUCUGAGA	2.582	2.6418	2.5358	1.8667	2.0437	2.4097	2.34662	2.22435	2.34275	2.47275
CGAGGCACC	2.435	2.5393	2.5617	2.3219	2.4989	2.3824	2.45653	2.37845	2.5191	2.47205
CCCGAGGGU	2.4773	2.2192	1.9328	2.7712	2.0043	3.0097	2.40242	2.62425	2.11175	2.47125
CACUCGAGU	2.3696	2.5555	2.2288	2.8904	3.3138	2.6991	2.6762	2.63	2.93465	2.46395
CCGGGUGGG	2.4988	2.69	2.6816	2.205	1.9241	2.2453	2.37413	2.3519	2.30705	2.46345
GAGAUGCCC	2.4682	2.5735	2.5479	2.6991	2.462	2.367	2.51962	2.58365	2.51775	2.45745
ACGCCCGAA	2.2452	2.3716	2.3642	2.9151	2.4311	2.5442	2.47857	2.58015	2.40135	2.4542
CCGAGGAUG	3.0614	3.1737	2.6795	2.7344	2.49	2.2256	2.72743	2.8979	2.83185	2.45255
AUGGGGGCG	2.4126	2.138	2.5074	2.1454	2.3906	2.3973	2.33188	2.279	2.2643	2.45235
CGUCCGAGA	2.6384	2.6237	2.2336	2.6386	2.3664	2.6687	2.52823	2.6385	2.49505	2.45115
CGCCCGAAG	2.5275	2.8898	2.6077	2.6508	2.5313	2.2931	2.58337	2.58915	2.71055	2.4504
CGCACCCGU	2.7671	2.5429	2.5313	2.5541	2.5655	2.3586	2.55325	2.6606	2.5542	2.44495
GCACCCGUG	2.6476	3.0393	2.6214	3.0231	2.7404	2.267	2.72313	2.83535	2.88985	2.4442
ACCCGGAAA	2.3199	2.3852	2.2135	2.3082	2.5124	2.6726	2.40197	2.31405	2.4488	2.44305
UGACGCCCA	2.6424	2.8088	2.2162	2.8389	2.3906	2.6579	2.59247	2.74065	2.5997	2.43705
CCAUCCGAG	2.4816	2.4095	2.4761	2.7533	2.4533	2.3934	2.49453	2.61745	2.4314	2.43475
GCCCGGGAG	2.5127	2.5288	2.4266	1.984	2.7724	2.441	2.44425	2.24835	2.6506	2.4338
CAGGGGGGG	2.5066	2.5153	2.0515	2.4055	1.8658	2.8142	2.35982	2.45605	2.19055	2.43285
AGUGGGAGG	2.4876	2.6866	2.4711	2.2387	2.1751	2.3928	2.40865	2.36315	2.43085	2.43195
CGGGGCGAA	2.3021	2.5928	2.2236	2.4558	2.3719	2.6392	2.4309	2.37895	2.48235	2.4314
GCGCUCGAG	2.7387	2.5674	2.259	3.2858	1.9415	2.6029	2.56588	3.01225	2.25445	2.43095
CACCCGACG	2.4225	2.4418	2.4119	2.1795	2.3578	2.4459	2.37657	2.301	2.3998	2.4289
CGACAUCCG	2.1903	2.4693	2.3591	2.9067	2.8965	2.4965	2.55307	2.5485	2.6829	2.4278
UGGCACCGG	2.5768	2.9425	2.5074	2.0092	2.1685	2.3477	2.42535	2.293	2.5555	2.42755
GAGGCCCGA	3.0456	2.6495	2.5378	2.6265	3.0786	2.3139	2.70865	2.83605	2.86405	2.42585
GGCCUGAGA	2.7573	2.748	2.5757	2.2768	2.8535	2.2697	2.58017	2.51705	2.80075	2.4227
CACCCGGUU	2.84	2.6746	2.5743	3.0608	3.4121	2.2701	2.80532	2.9504	3.04335	2.4222
AGGGAAGGA	2.6054	2.2354	2.3941	2.3515	2.4785	2.4485	2.4189	2.47845	2.35695	2.4213
GCCCCGAGG	2.3265	2.7833	2.5671	2.5541	2.4281	2.2726	2.48862	2.4403	2.6057	2.41985
GGGACCCGG	2.3113	2.2967	2.4091	2.4399	2.4146	2.428	2.38327	2.3756	2.35565	2.41855
UGGGCCCGA	2.2977	2.5317	2.4091	1.9912	2.1128	2.428	2.29508	2.14445	2.32225	2.41855
AUGCACCCG	2.9209	2.8606	2.3091	2.4727	2.022	2.5263	2.5186	2.6968	2.4413	2.4177
CUCGGUGGG	2.7918	3.228	2.8836	4.2909	2.3731	1.9491	2.91942	3.54135	2.80055	2.41635
CCGAGGGUG	2.3634	2.2398	1.9821	3.1058	2.4922	2.85	2.50555	2.7346	2.366	2.41605
CCCCGAGCG	2.1829	2.2334	2.2124	2.468	2.3894	2.619	2.35085	2.32545	2.3114	2.4157
AGCCCGAGG	2.3102	3.1906	2.5978	2.6673	2.8082	2.2311	2.6342	2.48875	2.9994	2.41445
GGCAUCCGA	2.5329	2.6167	2.5074	2.661	2.7445	2.3197	2.5637	2.59695	2.6806	2.41355
GGCACCCAG	2.4931	2.7976	2.6467	2.6937	2.8434	2.1784	2.60882	2.5934	2.8205	2.41255
UGAUGCCCG	2.6927	2.5363	2.9253	2.7712	3.3271	1.8989	2.69192	2.73195	2.9317	2.4121
GGCCGUGGG	2.3999	2.6985	2.2288	2.9665	1.9004	2.5903	2.46407	2.6832	2.29945	2.40955
GCACCCGUU	3.08	2.8061	2.2051	3.1953	2.1015	2.6102	2.66637	3.13765	2.4538	2.40765
CACCCGCGA	2.506	2.5747	2.4117	2.6967	2.6323	2.4006	2.537	2.60135	2.6035	2.40615
GACCUGAGA	2.5151	2.1811	2.3154	2.8992	2.5828	2.4945	2.49802	2.70715	2.38195	2.40495
GGAAGGUUG	2.7335	2.3216	2.3922	2.4167	2.9636	2.4117	2.53988	2.5751	2.6426	2.40195
CCCCCGGGA	2.5946	2.4767	2.4699	2.6517	2.3925	2.3317	2.48618	2.62315	2.4346	2.4008
GACCCUGAG	2.5721	2.8081	2.5074	2.5617	2.8335	2.2931	2.59598	2.5669	2.8208	2.40025
GUCCGAGGA	2.3775	2.2775	2.5074	2.5103	2.1205	2.2931	2.34772	2.4439	2.199	2.40025
CCCGGGUGC	2.7175	2.3412	2.3949	2.1729	1.7761	2.4033	2.30098	2.4452	2.05865	2.3991
GGUGCCCGA	2.5322	2.2586	2.6439	2.16	1.9634	2.1527	2.28513	2.3461	2.111	2.3983
CGAGGAUGG	3.0527	2.2398	2.6985	2.4519	2.0157	2.0965	2.42585	2.7523	2.12775	2.3975
UACCCGAGU	2.4299	2.6516	2.6955	2.6818	3.2389	2.0924	2.63168	2.55585	2.94525	2.39395
GACGCCCAG	2.6233	2.3185	2.4842	2.5626	2.4408	2.2931	2.45375	2.59295	2.37965	2.38865
CGGCUGGCG	2.491	1.9494	2.4505	2.0479	2.2448	2.3191	2.25045	2.26945	2.0971	2.3848
CGGCACCCA	2.7118	2.7668	2.4615	2.2004	2.7065	2.3057	2.52545	2.4561	2.73665	2.3836
CCCACCCGA	2.523	2.7789	2.4364	2.7951	2.641	2.3305	2.58415	2.65905	2.70995	2.38345
CAGCCGGGA	2.446	2.395	2.4535	2.5376	2.4414	2.3116	2.43085	2.4918	2.4182	2.38255
GGCACCCCA	2.7828	2.3911	2.5229	2.3308	2.5417	2.24	2.46822	2.5568	2.4664	2.38145
CCCGAGAAC	2.3651	2.576	2.4066	2.1948	2.3886	2.3524	2.38058	2.27995	2.4823	2.3795
CCCGAAGAA	2.2764	2.295	2.3455	2.6277	2.655	2.4086	2.4347	2.45205	2.475	2.37705
ACCCGAGGU	2.2595	2.5619	2.1824	2.1852	2.3517	2.5479	2.3481	2.22235	2.4568	2.36515
CGCCCGCGG	2.4529	2.5991	2.3012	2.2104	2.3656	2.4271	2.39272	2.33165	2.48235	2.36415
GACCACCCG	2.3699	2.3324	2.3278	2.3641	2.6397	2.3973	2.4052	2.367	2.48605	2.36255
UGCACCCGA	2.2761	2.7494	2.3655	2.4558	2.5171	2.358	2.45365	2.36595	2.63325	2.36175
CGUGCCGGG	2.4379	2.4519	2.3444	2.6862	2.0962	2.377	2.39893	2.56205	2.27405	2.3607
UCACCCGGU	2.5275	2.7488	2.6058	2.496	2.9176	2.1132	2.56815	2.51175	2.8332	2.3595
GGACACCCG	2.9759	3.0593	2.5074	2.5466	2.6906	2.2092	2.66483	2.76125	2.87495	2.3583
CCCUGGGGA	2.3931	2.384	2.334	2.3208	2.4203	2.3796	2.37197	2.35695	2.40215	2.3568
GCACCCUGG	2.4126	2.9305	2.3457	2.6991	2.6896	2.367	2.57408	2.55585	2.81005	2.35635
UUGCCCGAG	2.1631	2.8622	2.5375	2.7619	2.477	2.1745	2.49603	2.4625	2.6696	2.356
CCCGGGAAC	2.5539	2.3586	2.5485	2.7199	2.2501	2.1615	2.43208	2.6369	2.30435	2.355
ACACCCGAC	2.2718	2.5824	2.2458	2.4128	2.4874	2.4626	2.41047	2.3423	2.5349	2.3542
GCACCCCUG	2.3198	2.2525	2.4592	2.1454	2.1585	2.249	2.26407	2.2326	2.2055	2.3541
ACCCGAAGA	2.3146	2.3169	2.4055	2.7094	2.6698	2.3024	2.4531	2.512	2.49335	2.35395
CCACCCGAA	2.5389	2.4804	2.3465	2.9228	2.6133	2.3572	2.54318	2.73085	2.54685	2.35185
CGCCGAGAA	2.4169	2.3455	2.2392	2.1189	2.5022	2.4629	2.3476	2.2679	2.42385	2.35105
AGGCCCGAG	2.5168	2.4022	2.2742	2.4282	2.5655	2.4264	2.43555	2.4725	2.48385	2.3503
CUCGAGAAA	2.2755	2.6875	2.4445	2.9067	2.6207	2.2561	2.53183	2.5911	2.6541	2.3503
CACCGGAGA	2.2649	2.2398	2.3054	2.5619	2.0017	2.3939	2.2946	2.4134	2.12075	2.34965
AACCCGAGC	2.0172	2.6309	2.0755	2.439	2.498	2.6189	2.37992	2.2281	2.56445	2.3472
UAGCCCGAG	2.2058	2.7141	2.5313	2.2885	2.4555	2.162	2.39287	2.24715	2.5848	2.34665
GCGACGCCC	2.3054	2.4082	2.526	2.4474	2.0809	2.1657	2.32227	2.3764	2.24455	2.34585
UUCACCCGA	2.3518	2.4685	1.9912	2.503	2.641	2.6977	2.4422	2.4274	2.55475	2.34445
ACUCGAGAA	2.5179	2.5875	2.1244	3.2182	2.8506	2.5638	2.64373	2.86805	2.71905	2.3441
CCCCGAGAC	2.3557	2.3549	2.3938	2.8189	2.5406	2.2931	2.4595	2.5873	2.44775	2.34345
ACCCGCGAA	2.6532	2.6189	2.2393	2.928	2.9527	2.4445	2.63943	2.7906	2.7858	2.3419
ACGGCACCC	2.7075	2.5224	2.4571	2.3436	2.8437	2.224	2.51638	2.52555	2.68305	2.34055
GGUCGCUCG	2.5196	2.5442	2.1904	2.0715	2.1674	2.4907	2.33063	2.29555	2.3558	2.34055
GGGUACCCG	2.4356	2.4184	2.7675	2.8924	2.366	1.9109	2.46513	2.664	2.3922	2.3392
CGCCACCCG	2.3874	2.167	2.3376	2.9071	2.5342	2.3397	2.4455	2.64725	2.3506	2.33865
CCGCGGGAU	2.4759	2.2963	2.4051	2.0141	2.2775	2.2697	2.28977	2.245	2.2869	2.3374
AUGACGCCC	2.6711	2.3386	2.2985	2.7584	2.8633	2.375	2.55082	2.71475	2.60095	2.33675
GGGUGGCAC	2.8826	2.4035	2.1022	1.8637	2.9153	2.571	2.45638	2.37315	2.6594	2.3366
CUUGACCCC	2.2707	2.3871	2.446	2.5451	2.4523	2.2256	2.3878	2.4079	2.4197	2.3358
AACCCGAGU	2.4409	2.0109	2.0964	2.9544	2.5655	2.575	2.44052	2.69765	2.2882	2.3357
CGGCUCGAG	2.5181	2.4657	2.1663	2.1017	2.3037	2.5037	2.3432	2.3099	2.3847	2.335
UCACCCGAC	2.3625	2.356	2.2491	2.3535	2.2273	2.4181	2.32775	2.358	2.29165	2.3336
CCCUGGGAG	2.904	2.9042	2.2763	2.7084	2.7565	2.3906	2.65667	2.8062	2.83035	2.33345
AUCCCGGGU	2.1599	2.8283	2.3967	2.2567	2.2519	2.2676	2.36018	2.2083	2.5401	2.33215
GGCCCUUGG	2.3538	2.7668	2.4259	1.9187	2.1901	2.2371	2.3154	2.13625	2.47845	2.3315
CCCAGAGAA	2.2244	2.3351	2.2763	2.323	2.4381	2.3825	2.3299	2.2737	2.3866	2.3294
GAAGAUGGC	2.356	2.0786	2.3827	2.2842	1.972	2.276	2.22492	2.3201	2.0253	2.32935
CACACCCGG	2.827	2.5699	2.6483	2.8606	2.6808	2.0097	2.59938	2.8438	2.62535	2.329
CGAGGUUCC	2.6485	2.7183	2.2435	2.5971	2.5993	2.4138	2.53675	2.6228	2.6588	2.32865
CCCCGGGAC	2.5102	2.1578	2.2393	2.6582	2.2388	2.4121	2.3694	2.5842	2.1983	2.3257
GGGAAAGGG	2.9622	2.2932	2.3267	2.5127	2.5655	2.3241	2.4974	2.73745	2.42935	2.3254
AGGAGCCCG	2.7473	2.4193	2.2894	2.5289	2.268	2.3595	2.4354	2.6381	2.34365	2.32445
GCCCAGAGA	2.5201	2.4594	2.2558	2.553	2.8	2.3917	2.49667	2.53655	2.6297	2.32375
CCGAGAAAA	2.25	2.3979	2.1865	2.5745	2.8426	2.4582	2.45162	2.41225	2.62025	2.32235
GACCCCGGA	2.2955	2.74	2.4669	2.3329	2.2666	2.1706	2.37875	2.3142	2.5033	2.31875
UGGAGGGUG	2.5932	2.1081	2.5074	2.3157	2.199	2.1293	2.30878	2.45445	2.15355	2.31835
AGCACCCGU	2.4509	3.045	2.4146	2.6563	2.1379	2.2203	2.4875	2.5536	2.59145	2.31745
AGGCACCCA	2.3611	2.6184	2.3537	2.466	2.1674	2.2799	2.37442	2.41355	2.3929	2.3168
CCGCUGGGG	2.5629	2.4358	2.2503	2.2738	2.1379	2.3813	2.34033	2.41835	2.28685	2.3158
CAUCCGGGA	2.9978	2.488	2.3908	3.1599	2.6252	2.2397	2.65023	3.07885	2.5566	2.31525
ACCCGAGCA	2.3007	2.4674	2.0081	2.4891	2.5988	2.6207	2.41413	2.3949	2.5331	2.3144
GUGGCACCC	2.2924	2.7239	2.4686	2.7275	2.4163	2.1598	2.46475	2.50995	2.5701	2.3142
GGUACCCGA	2.8236	2.554	2.2663	2.9156	3.0835	2.3592	2.66703	2.8696	2.81875	2.31275
CCCCCGAGC	2.5471	2.0997	2.1755	2.9417	2.4108	2.4476	2.43707	2.7444	2.25525	2.31155
GCCCUGGGA	2.4557	2.5363	2.0895	2.0858	2.5388	2.5319	2.373	2.27075	2.53755	2.3107
UGCGCCCGG	2.5932	2.8986	2.4079	2.5541	2.2295	2.2112	2.48242	2.57365	2.56405	2.30955
GAGACCCGG	2.7573	2.6108	2.2374	2.8606	2.5655	2.3813	2.56882	2.80895	2.58815	2.30935
CCCGGCACC	2.3447	2.1939	2.4188	2.698	2.3809	2.1975	2.3723	2.52135	2.2874	2.30815
GAAGCCCGA	2.632	2.4105	2.384	2.6818	2.6384	2.2279	2.49577	2.6569	2.52445	2.30595
CCCGAGAGC	2.6332	2.6008	2.3403	2.2599	3.0273	2.2701	2.52193	2.44655	2.81405	2.3052
CCACUCGAG	2.3003	2.5492	2.2633	2.5552	2.9114	2.3446	2.48733	2.42775	2.7303	2.30395
CGGGAAGAG	2.5585	2.4476	2.1378	2.6405	1.9488	2.4695	2.36712	2.5995	2.1982	2.30365
CCUGGGGAA	2.0404	2.2873	2.4042	2.5173	2.4629	2.2013	2.3189	2.27885	2.3751	2.30275
UACGCCCGA	2.1515	2.5013	2.0852	2.4705	2.3711	2.5189	2.34975	2.311	2.4362	2.30205
UGGAGAAGG	2.2028	1.7042	2.4348	2.6118	2.203	2.1684	2.22083	2.4073	1.9536	2.3016
CCCGGGGCA	2.4078	2.3252	2.2602	2.1757	1.9693	2.3415	2.24662	2.29175	2.14725	2.30085
ACCUGAGGA	2.2846	2.3584	2.2089	2.4315	2.254	2.3913	2.32145	2.35805	2.3062	2.3001
UGGAGGGGU	2.5033	1.796	2.7274	2.1078	2.2954	1.8707	2.21677	2.30555	2.0457	2.29905
GACGCUCGA	2.5234	2.5363	2.2836	2.7073	2.4281	2.3135	2.46537	2.61535	2.4822	2.29855
UGACACCUG	2.1962	2.7668	2.1964	2.9271	2.1777	2.3997	2.44398	2.56165	2.47225	2.29805
CCCCGAGAA	2.5683	2.3503	2.4131	2.4684	2.5241	2.1821	2.41772	2.51835	2.4372	2.2976
GACCCCGGC	2.5579	2.3019	2.2726	2.2341	2.3535	2.3215	2.34025	2.396	2.3277	2.29705
GCCAGAGGA	2.4922	2.2229	2.4753	2.2921	2.1215	2.1167	2.28678	2.39215	2.1722	2.296
GAGGUGACG	2.359	2.152	2.2474	2.0024	2.1379	2.344	2.20712	2.1807	2.14495	2.2957
GGGAAGAGA	2.1008	2.4448	2.0597	2.4973	2.2194	2.5297	2.30862	2.29905	2.3321	2.2947
GGAUCAGGG	1.9914	1.9727	2.1689	2.3441	1.9598	2.4205	2.1429	2.16775	1.96625	2.2947
GGGACCCGA	2.6274	2.2322	2.4953	2.5289	1.952	2.0937	2.32158	2.57815	2.0921	2.2945
GGCACUCGG	2.9195	3.1466	2.2616	2.9026	2.7164	2.3268	2.71225	2.91105	2.9315	2.2942
GGAGUUGCG	2.1829	2.0598	2.2567	2.8129	1.7103	2.3313	2.22565	2.4979	1.88505	2.294
ACCACCCGG	2.3196	2.3716	2.2753	2.3498	2.4739	2.3113	2.35025	2.3347	2.42275	2.2933
AGGGAGUUC	2.3437	2.477	2.5552	2.0433	2.2356	2.031	2.28097	2.1935	2.3563	2.2931
CCACCCGGA	2.3539	2.4936	2.1979	2.405	2.442	2.3865	2.37982	2.37945	2.4678	2.2922
GAGCCCGAG	2.6228	2.4069	2.1201	2.7908	3.0348	2.4609	2.57272	2.7068	2.72085	2.2905
UUUGCCGGG	2.5452	2.4476	2.5074	2.1454	2.1215	2.0726	2.30662	2.3453	2.28455	2.29
UGGGAAUGG	2.4721	2.1944	2.6804	2.1701	2.1232	1.8977	2.25632	2.3211	2.1588	2.28905
CCUGGGAGA	3.0706	2.683	2.4125	2.7631	2.5946	2.1628	2.61443	2.91685	2.6388	2.28765
GGUUCCGGG	2.9779	2.2873	2.006	2.6889	2.5142	2.5682	2.50708	2.8334	2.40075	2.2871
UGCCCGAGU	2.4509	2.2288	2.0895	1.8673	2.2804	2.4842	2.23352	2.1591	2.2546	2.28685
GAAAGAGAG	2.2834	2.2892	2.2388	2.5669	2.325	2.334	2.33955	2.42515	2.3071	2.2864
UACCCGGGG	2.2675	2.3542	2.3975	2.0325	2.2279	2.1724	2.242	2.15	2.29105	2.28495
CGACACCCC	2.3827	2.446	2.3015	2.4253	2.4818	2.2681	2.38423	2.404	2.4639	2.2848
ACCGGAGGG	2.4524	2.3766	2.2985	2.448	1.8501	2.271	2.28277	2.4502	2.11335	2.28475
CACCCGCCC	2.338	2.3532	2.1843	2.6099	2.3605	2.3817	2.37127	2.47395	2.35685	2.283
GUCACCCGA	2.334	2.2976	2.2288	2.3838	2.0929	2.3333	2.2784	2.3589	2.19525	2.28105
ACCCGGAGC	2.3906	2.4725	2.3385	2.465	2.3062	2.2199	2.36545	2.4278	2.38935	2.2792
CCUGGGGAG	2.4649	2.7389	2.2288	2.5138	2.2934	2.3278	2.42793	2.48935	2.51615	2.2783
CUGGGGGUG	2.6041	2.6131	2.136	2.3838	1.7103	2.4205	2.3113	2.49395	2.1617	2.27825
GCACUCGGG	2.2504	2.3328	1.9912	3.3233	2.3391	2.5628	2.4666	2.78685	2.33595	2.277
CCCCGAGGC	2.2212	2.4315	2.3301	2.2249	2.2804	2.2236	2.28528	2.22305	2.35595	2.27685
GGAGAAGCC	2.2291	1.7727	2.2903	2.3591	2.0157	2.2633	2.15503	2.2941	1.8942	2.2768
ACGACACCC	2.1915	2.4275	2.2157	2.2804	2.0693	2.3363	2.25345	2.23595	2.2484	2.276
CGAUGCUCG	2.5625	2.6064	2.3802	2.3942	2.9001	2.1684	2.50197	2.47835	2.75325	2.2743
GACACCUGA	2.2157	2.5165	2.3045	2.7788	2.4555	2.2439	2.41915	2.49725	2.486	2.2742
AUGACCCCG	2.379	2.2945	2.0997	2.6164	2.4247	2.4469	2.37687	2.4977	2.3596	2.2733
GGCCACCCG	2.806	2.5498	2.4681	2.2716	2.3844	2.0773	2.4262	2.5388	2.4671	2.2727
GAUGCCCGC	2.4522	2.2981	2.343	2.2744	2.6496	2.1991	2.3694	2.3633	2.47385	2.27105
GCCCGGGGC	2.8435	2.421	2.3681	2.5924	2.3517	2.1736	2.45838	2.71795	2.38635	2.27085
GCCCGGAAG	2.2769	2.5991	2.1782	2.1671	2.41	2.3626	2.33232	2.222	2.50455	2.2704
CGUCCGGGA	1.9506	2.237	2.2948	2.2824	1.774	2.2443	2.13052	2.1165	2.0055	2.26955
CGGUGAGUG	3.1403	2.3228	2.4146	2.4368	2.3279	2.1232	2.46093	2.78855	2.32535	2.2689
CCGACCCCG	2.5477	2.4864	2.4227	2.7349	2.3575	2.1149	2.44402	2.6413	2.42195	2.2688
CACCCGCGG	2.5329	2.5202	2.4005	2.4115	2.3119	2.1331	2.38502	2.4722	2.41605	2.2668
GGGAAGUGG	2.7297	3.2095	2.24	2.5745	2.3603	2.2931	2.56785	2.6521	2.7849	2.26655
GGGUCCGGG	3.1403	2.1861	3.0027	2.1719	1.9479	1.5287	2.3296	2.6561	2.067	2.2657
CCCCCCCCC	2.2269	2.5944	2.07	2.3838	2.6814	2.4609	2.4029	2.30535	2.6379	2.26545
GGCAGGAGA	2.2434	2.2135	2.2339	2.3145	2.0291	2.2931	2.22125	2.27895	2.1213	2.2635
CAUCCGGGG	2.1481	2.3164	2.26	2.4614	2.2374	2.2664	2.28162	2.30475	2.2769	2.2632
CCCCGGGGG	2.2196	2.361	2.3236	2.2313	2.3089	2.2013	2.27428	2.22545	2.33495	2.26245
CCCGAGACG	2.3417	2.0751	2.2985	2.4189	2.3203	2.2256	2.28002	2.3803	2.1977	2.26205
GUCUGCGGG	2.3331	2.4121	2.5396	2.0354	2.0721	1.9844	2.22945	2.18425	2.2421	2.262
CCGACACCC	2.3413	2.4329	2.2985	2.4167	2.3554	2.2239	2.34478	2.379	2.39415	2.2612
ACGCCUGAG	2.6445	2.5488	2.4163	2.8086	2.7288	2.1055	2.54208	2.72655	2.6388	2.2609
GAGGAGGCG	2.0071	2.4142	2.3956	2.3558	2.7919	2.1245	2.34818	2.18145	2.60305	2.26005
CGCACCCGA	2.2794	2.5086	2.4406	2.5745	2.7707	2.0791	2.44215	2.42695	2.63965	2.25985
GCCCGAGGU	2.6041	3.0401	2.3527	2.2779	3.0406	2.1657	2.58018	2.441	3.04035	2.2592
GAAGACACC	2.0196	2.2086	1.9414	2.6598	2.2504	2.5747	2.27575	2.3397	2.2295	2.25805
GGGAGUUUC	2.0967	2.3826	2.3172	3.3373	2.5655	2.1975	2.4828	2.717	2.47405	2.25735
GGGAAGAAG	2.0351	2.2545	2.2737	2.52	2.1583	2.2385	2.24668	2.27755	2.2064	2.2561
GACCUGGGA	2.2895	2.388	2.2985	2.2987	2.2906	2.2112	2.29608	2.2941	2.3393	2.25485
GAGACCCCG	2.2842	2.2243	2.4173	2.0333	2.3014	2.0907	2.2252	2.15875	2.26285	2.254
GCGCGAGAG	2.7032	2.5679	2.3272	2.524	2.2385	2.1807	2.42358	2.6136	2.4032	2.25395
CCCCGAGAG	2.4571	2.395	2.3996	2.3761	2.5241	2.1081	2.37667	2.4166	2.45955	2.25385
GGCGUCCGA	2.4789	2.3589	2.1699	2.0079	2.1215	2.3372	2.24572	2.2434	2.2402	2.25355
CCCGGGGUC	2.6771	2.3593	2.2936	1.9292	2.2374	2.2131	2.28495	2.30315	2.29835	2.25335
CUUGCACCC	2.2748	2.444	2.1174	2.36	2.651	2.3886	2.37263	2.3174	2.5475	2.253
GCCGAGGAG	1.9976	2.5786	2.2584	2.3644	1.6754	2.2463	2.18678	2.181	2.127	2.25235
GUGAGAGGG	2.4245	2.4488	2.248	1.9728	1.9905	2.2535	2.22302	2.19865	2.21965	2.25075
CCGGCACCC	2.4093	2.3639	2.1747	2.569	2.5157	2.3265	2.39318	2.48915	2.4398	2.2506
CCCGCUGGG	2.7896	2.2048	2.1157	2.1007	1.884	2.3826	2.24623	2.44515	2.0444	2.24915
GGCACCCGA	2.2834	2.5939	2.7425	2.1007	1.844	1.7556	2.22002	2.19205	2.21895	2.24905
UCCGAGAAU	2.4056	2.0892	2.2516	2.1017	2.5393	2.2463	2.27228	2.25365	2.31425	2.24895
CCCGAGCGC	2.3265	2.3895	2.308	2.3242	2.7696	2.1888	2.38443	2.32535	2.57955	2.2484
GGACGUCGG	3.1285	2.5895	2.1538	2.2004	2.2201	2.3372	2.43825	2.66445	2.4048	2.2455
GGUGCCCGG	2.5805	2.3648	2.3146	2.3838	2.1379	2.1755	2.32618	2.48215	2.25135	2.24505
GUGCACCCG	2.4496	2.7504	2.194	2.171	2.199	2.2931	2.34285	2.3103	2.4747	2.24355
CCGGGACCG	2.4424	2.5163	2.2082	1.96	2.1537	2.2789	2.25992	2.2012	2.335	2.24355
CCCCGCCCG	2.7441	2.5201	2.4116	2.5691	2.3857	2.074	2.45077	2.6566	2.4529	2.2428
GCCCGAUGG	2.2031	2.7488	2.1469	2.6082	2.1631	2.338	2.36802	2.40565	2.45595	2.24245
AGACACCCA	2.1254	2.4594	1.9765	2.1719	2.7318	2.5054	2.3284	2.14865	2.5956	2.24095
AGGCCCCGA	2.4885	2.2965	2.3486	2.174	2.0524	2.1326	2.24877	2.33125	2.17445	2.2406
GUGCGCCCG	2.696	2.8693	2.3403	2.7017	2.3375	2.1402	2.51417	2.69885	2.6034	2.24025
CACCCGAUG	2.245	2.3556	2.2025	2.5127	2.6175	2.2776	2.36848	2.37885	2.48655	2.24005
GACGCCUGG	2.4844	2.7668	2.2811	2.6818	2.2715	2.1975	2.44718	2.5831	2.51915	2.2393
GCUCCGAGA	2.1491	2.1023	2.0817	2.5871	2.5844	2.3942	2.31647	2.3681	2.34335	2.23795
GCACCCAAG	2.1391	2.4521	2.0642	2.5768	2.4128	2.4114	2.34273	2.35795	2.43245	2.2378
ACGCACCCG	2.3545	2.6528	2.2727	2.1856	2.652	2.2029	2.38675	2.27005	2.6524	2.2378
GCUGGAGAG	2.2485	2.5033	2.4278	2.1454	2.0463	2.0474	2.23645	2.19695	2.2748	2.2376
AGCCGGGAA	2.1924	2.0879	2.3565	2.2646	2.0666	2.1179	2.18098	2.2285	2.07725	2.2372
ACCGGGAAG	2.3186	2.3895	2.0769	2.6872	2.5849	2.3973	2.40907	2.5029	2.4872	2.2371
GAUCCGAGA	2.0864	2.0413	2.1346	2.5555	2.2576	2.3389	2.23572	2.32095	2.14945	2.23675
CCCAGAAGA	2.3381	2.098	2.1653	2.4842	2.1979	2.3065	2.265	2.41115	2.14795	2.2359
CACGCCCGA	2.3317	2.3899	2.1586	2.5123	2.677	2.313	2.39708	2.422	2.53345	2.2358
UACCUGAGA	2.3415	2.2691	2.2686	2.6336	2.199	2.2021	2.31898	2.48755	2.23405	2.23535
CCGAGGGCG	2.444	2.6159	2.0515	2.1844	2.1457	2.4181	2.30993	2.3142	2.3808	2.2348
UUCGCCCGA	2.5434	2.4488	2.176	2.4907	2.1674	2.2931	2.35323	2.51705	2.3081	2.23455
GCCCCGAGC	2.4233	2.4626	2.3179	2.5657	2.5787	2.1512	2.41657	2.4945	2.52065	2.23455
CCCGCGGAG	2.3764	2.0145	2.1005	2.3525	1.9748	2.3685	2.19787	2.36445	1.99465	2.2345
GACACCCAG	2.4448	2.3979	2.2511	2.441	2.5655	2.2166	2.38615	2.4429	2.4817	2.23385
CAGGCGCCC	2.4802	1.9079	2.0486	1.9912	1.7606	2.4167	2.10087	2.2357	1.83425	2.23265
GAGCGACGC	2.4765	2.2545	2.2288	2.4544	1.8053	2.2365	2.24267	2.46545	2.0299	2.23265
CGGGGUUUC	2.7318	2.4936	2.7241	3.0725	1.8053	1.741	2.42805	2.90215	2.14945	2.23255
GCUGGGUGG	2.5759	3.3979	2.1115	2.2584	1.5528	2.3534	2.37498	2.41715	2.47535	2.23245
GAGAGUCUG	2.4883	2.3169	1.9163	1.9187	1.9398	2.5447	2.18745	2.2035	2.12835	2.2305
AGGCCCGGG	2.585	2.2638	2.0895	2.438	2.274	2.3712	2.33692	2.5115	2.2689	2.23035
GGAUGAGAA	2.1896	2.0073	2.4091	2.0697	1.8411	2.0503	2.09452	2.12965	1.9242	2.2297
CGGCACCCG	2.1829	2.959	2.1418	2.1156	2.3784	2.317	2.34912	2.14925	2.6687	2.2294
GCCUGGGGA	2.4238	2.9751	2.0491	2.2146	2.8138	2.404	2.48007	2.3192	2.89445	2.22655
CCUGAGAGC	2.2263	2.2185	2.3606	2.1261	2.1148	2.0917	2.18967	2.1762	2.16665	2.22615
CAGUGGGGC	1.941	1.9416	2.2174	2.296	2.2279	2.2327	2.14277	2.1185	2.08475	2.22505
GAACCCGCG	2.2658	2.1493	2.0859	2.077	2.3424	2.3629	2.21388	2.1714	2.24585	2.2244
UGACACUCG	2.5111	2.5253	1.99	2.9968	2.2295	2.4569	2.4516	2.75395	2.3774	2.22345
GACCAGGAG	2.2011	2.4105	2.232	2.1942	1.997	2.2149	2.20828	2.19765	2.20375	2.22345
GCGCUCCGG	2.2977	1.9983	2.0199	2.2408	2.4372	2.4268	2.23678	2.26925	2.21775	2.22335
CUGCGCCCG	2.9789	2.9809	2.2537	2.5541	2.1532	2.1907	2.51858	2.7665	2.56705	2.2222
CAUCCGAGC	2.1369	2.3979	2.1206	2.8248	2.1646	2.3217	2.32775	2.48085	2.28125	2.22115
UCCGCCCGA	2.7037	2.0905	2.3403	2.4315	2.6083	2.102	2.37938	2.5676	2.3494	2.22115
CACCGGAGG	2.6479	2.7083	2.2023	2.2249	2.2804	2.2385	2.38372	2.4364	2.49435	2.2204
CCCGGGAGG	2.4046	2.3808	2.1187	1.9292	2.297	2.3197	2.24167	2.1669	2.3389	2.2192
GGCUCCCGG	2.464	2.6099	2.1696	2.0085	1.9378	2.2687	2.24308	2.23625	2.27385	2.21915
UGCCCGAGC	2.198	2.558	2.1447	2.5367	2.4203	2.2931	2.35847	2.36735	2.48915	2.2189
UCCGGGAAA	2.4126	2.1739	2.2089	2.3498	2.1807	2.2276	2.25892	2.3812	2.1773	2.21825
CACCCGAAG	2.3054	2.7668	2.2195	2.6222	2.4087	2.2166	2.4232	2.4638	2.58775	2.21805
CCCCGAGCC	2.4509	2.2929	2.3333	2.5229	2.4764	2.102	2.36307	2.4869	2.38465	2.21765
GGAGCCCGG	2.2772	2.2892	2.2239	2.1199	2.5426	2.2112	2.27733	2.19855	2.4159	2.21755
GACCCCAGA	2.1327	2.0586	2.2873	2.0783	2.0836	2.1474	2.13132	2.1055	2.0711	2.21735
GGGAAAAAA	2.0447	1.8601	2.2375	2.3383	2.2989	2.1965	2.16267	2.1915	2.0795	2.217
CCCGGGUUG	2.0366	2.0332	2.3491	2.2104	1.6617	2.0846	2.0626	2.1235	1.84745	2.21685
CGGCCCCGG	2.2498	2.3006	2.2411	2.4205	2.3259	2.1923	2.28837	2.33515	2.31325	2.2167
ACCUGAGAC	2.2097	2.0687	2.0544	2.4596	2.4216	2.3788	2.26547	2.33465	2.24515	2.2166
ACACCCGAU	2.5023	2.8679	2.2327	2.2728	2.6358	2.1988	2.45172	2.38755	2.75185	2.21575
UUCACCCGG	2.3871	2.4082	2.2443	2.2514	2.1617	2.1869	2.27327	2.31925	2.28495	2.2156
ACCCUGGGA	2.5875	2.2723	2.0714	2.3631	2.5469	2.3595	2.36678	2.4753	2.4096	2.21545
CGGGAAUGU	2.5658	2.2801	2.3914	2.066	2.4586	2.0383	2.30003	2.3159	2.36935	2.21485
CCGGGUUUG	2.9081	2.421	2.0634	2.95	1.6435	2.3647	2.39178	2.92905	2.03225	2.21405
CACCCGACU	2.3757	2.3057	2.0522	2.3753	2.3021	2.375	2.29767	2.3755	2.3039	2.2136
CAGACACCC	2.068	2.6996	2.2411	2.2944	2.6724	2.1856	2.36018	2.1812	2.686	2.21335
CGACACUCG	2.5308	2.2662	2.2806	2.7788	2.2906	2.1457	2.38212	2.6548	2.2784	2.21315
GACGUCCGA	2.0955	2.275	2.2245	2.5745	2.0182	2.2013	2.2315	2.335	2.1466	2.2129
ACCCUGAGA	1.9939	2.4098	2.2651	2.7683	2.4138	2.1575	2.33473	2.3811	2.4118	2.2113
GAGAGACCC	2.3385	2.2755	2.234	2.2858	2.1579	2.1859	2.24627	2.31215	2.2167	2.20995
GCCCGAGGC	2.5706	2.7668	2.2462	2.2944	3.0465	2.1736	2.51635	2.4325	2.90665	2.2099
GAAACCGGG	2.2172	2.2154	2.1972	2.0054	1.9969	2.2222	2.14238	2.1113	2.10615	2.2097
CCUGGCGCC	2.4028	2.1739	1.994	2.4315	1.8325	2.4241	2.2098	2.41715	2.0032	2.20905
CGAGACCCG	2.8013	2.6687	2.1962	2.541	2.5246	2.2199	2.49195	2.67115	2.59665	2.20805
CCGGGAAGU	2.2094	2.5777	2.1217	2.6772	2.401	2.2931	2.38002	2.4433	2.48935	2.2074
GAGACCCGA	2.8424	2.5733	2.4043	2.5251	2.7239	2.01	2.51317	2.68375	2.6486	2.20715
CGGGAAGGC	2.2403	2.0751	2.3628	2.448	1.9735	2.0505	2.1917	2.34415	2.0243	2.20665
CUCGAGGAU	2.2212	2.4799	2.2474	2.511	2.0809	2.1657	2.28435	2.3661	2.2804	2.20655
CCCGGCUGG	2.5618	2.3676	2.0334	2.4763	1.8763	2.3786	2.28233	2.51905	2.12195	2.206
AUUGGCACC	2.2518	2.6644	2.3217	2.1931	2.5085	2.0892	2.33812	2.22245	2.58645	2.20545
CCUGAGAGA	2.4532	2.4956	2.2862	2.6292	2.7541	2.1245	2.45713	2.5412	2.62485	2.20535
CCCGGCGAG	2.7485	2.5185	2.2931	2.5489	2.3846	2.1167	2.43505	2.6487	2.45155	2.2049
GGCCGGGAA	2.3983	2.6131	2.2811	2.354	2.5655	2.1259	2.38965	2.37615	2.5893	2.2035
CGGAAAAGG	2.357	2.5387	2.4086	2.1531	2.0965	1.9972	2.25852	2.25505	2.3176	2.2029
CCGGGGUUU	2.2403	2.4375	2.3582	2.1965	1.8325	2.0474	2.1854	2.2184	2.135	2.2028
CCCGAGUUG	2.3874	2.4069	2.4463	2.6164	2.4091	1.9575	2.3706	2.5019	2.408	2.2019
UCCCGAGCG	2.2058	2.3189	2.2089	2.0637	1.9974	2.1948	2.16492	2.13475	2.15815	2.20185
ACCCGGAAG	2.068	2.0852	2.2469	2.7984	2.6213	2.156	2.3293	2.4332	2.35325	2.20145
GGCGGAGGU	2.6674	2.5663	2.5074	2.5496	2.2309	1.8943	2.40265	2.6085	2.3986	2.20085
CCUGGGAGC	2.3113	2.6222	2.3108	1.9351	2.5906	2.0907	2.31012	2.1232	2.6064	2.20075
GACAGCCGA	1.9705	2.1986	2.2469	2.2971	2.0213	2.1541	2.14808	2.1338	2.10995	2.2005
ACACCCGGC	2.3845	2.5598	2.3625	2.3935	2.4477	2.0357	2.36395	2.389	2.50375	2.1991
CUGUUGGGG	2.068	1.9324	2.6482	2.52	2.0157	1.7471	2.15523	2.294	1.97405	2.19765
UGGCCCGAG	2.3831	3.004	2.3642	2.4519	2.1257	2.031	2.39332	2.4175	2.56485	2.1976
GCACGGGGA	1.9862	2.2041	2.2374	2.2303	1.8263	2.157	2.10688	2.10825	2.0152	2.1972
GGAGGCUGG	3.056	2.5209	2.6746	2.0501	2.1807	1.7198	2.36702	2.55305	2.3508	2.1972
CACCCAAGA	2.068	2.4139	2.0291	2.3352	2.4084	2.3633	2.26965	2.2016	2.41115	2.1962
GCCCGGGGU	2.4773	2.0463	2.0634	2.2348	2.2047	2.3289	2.2259	2.35605	2.1255	2.19615
AGGGGUUCG	2.5275	2.3057	2.194	2.1454	1.9776	2.1975	2.22462	2.33645	2.14165	2.19575
CUGGGAAAA	2.1775	2.198	2.2262	2.0719	1.9421	2.1645	2.13003	2.1247	2.07005	2.19535
GGUGCGAUG	2.348	1.9887	2.4552	1.8773	2.2849	1.9348	2.14815	2.11265	2.1368	2.195
CCCGGGUUA	2.3408	2.3057	2.2637	2.205	1.9508	2.1259	2.19865	2.2729	2.12825	2.1948
CCUGGGAAA	2.5589	2.4594	2.3048	2.2971	2.5849	2.0846	2.38162	2.428	2.52215	2.1947
GGCAGGUUG	2.4022	2.152	2.3048	2.1238	1.9436	2.0846	2.1685	2.263	2.0478	2.1947
GAGGAGUCG	2.5343	2.0073	2.1633	2.3978	2.49	2.2256	2.30305	2.46605	2.24865	2.19445
UGCGGUUUG	2.0945	2.0219	2.0957	2.1454	1.6774	2.2931	2.05467	2.11995	1.84965	2.1944
CGACCAGGG	2.1134	1.9155	2.284	2.2633	1.6352	2.1041	2.05258	2.18835	1.77535	2.19405
GAGGGAUCC	2.2368	2.3151	2.2345	1.9557	2.0157	2.1527	2.15175	2.09625	2.1654	2.1936
CGAAGAGAA	2.3079	2.1423	1.9414	2.3174	2.4112	2.4455	2.26095	2.31265	2.27675	2.19345
GCCGCCCGG	2.5467	2.7156	2.3797	2.6619	2.6011	2.0064	2.48523	2.6043	2.65835	2.19305
CGAGGCCCG	2.543	2.6297	2.2477	2.0875	2.5828	2.1381	2.37147	2.31525	2.60625	2.1929
CCCCGGGAU	2.0124	2.0826	2.1473	2.3069	1.9448	2.2376	2.12193	2.15965	2.0137	2.19245
CAGCCCGGG	2.4356	2.152	2.396	2.7176	1.9669	1.9873	2.2759	2.5766	2.05945	2.19165
UGGCCCGGG	2.1033	2.2702	2.0597	2.1638	2.4997	2.3225	2.23653	2.13355	2.38495	2.1911
GCCCGAAAA	2.2254	2.226	2.1308	2.631	2.518	2.2506	2.3303	2.4282	2.372	2.1907
GUCCGCCCG	2.1891	2.2185	2.1347	2.3194	2.5655	2.2466	2.27897	2.25425	2.392	2.19065
UGCGGGCGG	3.2456	2.4978	2.6119	2.3838	2.1379	1.7676	2.44077	2.8147	2.31785	2.18975
GACACCCCA	2.3132	2.3645	2.1709	1.9295	2.2728	2.2084	2.20988	2.12135	2.31865	2.18965
CCCUGAGAU	2.2116	2.3057	2.2288	2.1852	1.9063	2.1498	2.16457	2.1984	2.106	2.1893
CGCCCGGAG	2.4181	2.7083	2.3217	2.3611	2.1176	2.0565	2.33055	2.3896	2.41295	2.1891
CCCGAAAGA	2.0156	2.2599	1.9973	2.3838	2.3104	2.3802	2.22453	2.1997	2.28515	2.18875
CCCCCGGGU	2.5248	2.1341	2.177	2.1621	1.9838	2.1997	2.19692	2.34345	2.05895	2.18835
CUCGCCCGA	2.4666	2.6113	2.014	2.5159	2.72	2.3621	2.44832	2.49125	2.66565	2.18805
AGAACCCGA	2.1614	2.0647	2.044	2.0947	2.2758	2.3301	2.16178	2.12805	2.17025	2.18705
GCCCGAGCA	2.2429	2.5191	2.0459	2.7111	2.2783	2.3273	2.3541	2.477	2.3987	2.1866
UAGACGCCC	2.5721	2.7531	2.233	2.3909	2.2017	2.1391	2.38165	2.4815	2.4774	2.18605
CCCGAGAUA	2.185	2.21	2.2078	2.2399	2.2509	2.1633	2.20948	2.21245	2.23045	2.18555
AUCUGAGUC	1.9862	2.1728	2.0756	2.3273	2.1089	2.2931	2.16065	2.15675	2.14085	2.18435
GCUCCGAGG	2.6778	2.1283	2.0092	1.9804	2.1708	2.3592	2.22095	2.3291	2.14955	2.1842
GAGAGGCCC	2.3559	2.2415	2.19	2.3899	1.8348	2.177	2.19818	2.3729	2.03815	2.1835
CCCGAAAUC	2.1837	2.238	2.2503	2.3105	2.413	2.1167	2.25203	2.2471	2.3255	2.1835
CACCCGGCC	2.4204	2.4062	2.1052	2.7315	2.6041	2.2586	2.421	2.57595	2.50515	2.1819
CCCGGGACA	2.4166	2.2368	2.2288	2.2852	2.2706	2.1349	2.26215	2.3509	2.2537	2.18185
GGGCACCGG	2.2472	2.6377	2.2065	2.7748	2.3603	2.1555	2.397	2.511	2.499	2.181
GAGGAGGGG	2.2334	2.029	2.2065	2.4601	1.7445	2.1555	2.13817	2.34675	1.88675	2.181
GACGCCGAG	2.6819	2.5074	2.1026	2.1007	1.864	2.2572	2.2523	2.3913	2.1857	2.1799
GGAGAGAGG	2.6159	2.2939	2.2717	2.7139	2.1379	2.0873	2.35343	2.6649	2.2159	2.1795
CCCUGAGAA	2.332	2.5314	2.0895	2.6171	2.4154	2.2687	2.37568	2.47455	2.4734	2.1791
AGCCCGAGC	1.9263	2.451	2.0161	2.312	2.3195	2.3402	2.22752	2.11915	2.38525	2.17815
UCCAAGGGG	2.585	2.3222	2.1642	1.9156	2.0157	2.1907	2.1989	2.2503	2.16895	2.17745
GCCCGCGAA	2.5275	2.5004	2.136	2.4951	2.6653	2.2166	2.42348	2.5113	2.58285	2.1763
CGCGCCCGG	2.554	2.0692	1.8967	2.3838	1.8419	2.4548	2.20007	2.4689	1.95555	2.17575
GCAUCUGAG	2.3871	2.2886	2.3527	2.7017	2.1142	1.9958	2.30668	2.5444	2.2014	2.17425
GGAACCCGG	2.2277	2.1032	2.0691	2.2501	2.1901	2.2791	2.18655	2.2389	2.14665	2.1741
AGCCCGGGC	2.1491	2.4278	2.1726	2.482	2.6787	2.175	2.34753	2.31555	2.55325	2.1738
CCCCCCGGG	2.4231	2.1031	2.1402	2.6764	2.3323	2.2062	2.31355	2.54975	2.2177	2.1732
GGUCGGUCG	2.516	1.8446	1.8806	2.503	2.1807	2.4651	2.23167	2.5095	2.01265	2.17285
GUCUGUUGG	2.1933	1.9284	2.0515	2.6655	1.7492	2.2931	2.14683	2.4294	1.8388	2.1723
CCCGUGGGG	2.4471	1.9598	2.194	2.0024	1.86	2.1498	2.10218	2.22475	1.9099	2.1719
AGACACUCG	2.0214	2.1561	2.004	2.3387	1.9068	2.3396	2.12777	2.18005	2.03145	2.1718
UUUGACACC	1.9715	2.5639	1.7976	2.1168	2.2833	2.5453	2.21307	2.04415	2.4236	2.17145
CCCGGGUGA	2.5913	2.4082	2.1979	1.9071	2.5893	2.1444	2.30637	2.2492	2.49875	2.17115
GUGCCCGAG	2.6807	1.9983	2.461	2.4235	1.8885	1.879	2.22183	2.5521	1.9434	2.17
CCAGAGAAG	2.0922	2.0549	1.9956	2.3336	2.1267	2.3434	2.15773	2.2129	2.0908	2.1695
CCCCGAGUG	2.7696	2.6845	2.2089	2.4775	2.7258	2.1293	2.49927	2.62355	2.70515	2.1691
UUCGAGAGA	1.9169	2.1478	2.17	2.2336	2.1438	2.1674	2.12992	2.07525	2.1458	2.1687
CCCGAGACC	2.3466	2.3548	2.1162	2.4954	2.3335	2.2199	2.31107	2.421	2.34415	2.16805
GGUGGCACC	2.6932	2.295	2.0409	1.896	2.4163	2.2931	2.27242	2.2946	2.35565	2.167
CCGGGAUCA	2.2907	2.029	2.2503	2.3765	2.1708	2.0814	2.19978	2.3336	2.0999	2.16585
CCCGAGUCC	2.2058	2.2873	2.2065	2.441	2.0866	2.1249	2.22535	2.3234	2.18695	2.1657
UGGUCGUGG	2.068	2.0873	2.2174	2.1078	2.4305	2.112	2.1705	2.0879	2.2589	2.1647
GGUCACCCG	2.3322	2.0444	2.1313	2.1454	1.689	2.1975	2.08997	2.2388	1.8667	2.1644
UUGGGCGGG	2.429	2.5472	2.3084	2.3157	2.7487	2.0201	2.39485	2.37235	2.64795	2.16425
GUUCUGGGG	3.0411	2.2786	2.5074	2.0192	2.2637	1.821	2.32183	2.53015	2.27115	2.1642
GAGCCGUCG	2.3671	2.4014	2.4444	2.6447	2.4929	1.882	2.37208	2.5059	2.44715	2.1632
GACCCCGAA	2.3306	2.3904	2.2743	2.52	2.2863	2.0513	2.30882	2.4253	2.33835	2.1628
CCCGUCCGG	2.1706	1.9623	2.3366	2.1607	1.5011	1.9881	2.0199	2.16565	1.7317	2.16235
CACACCCGU	2.3568	2.3716	2.2686	2.343	2.4311	2.0528	2.30398	2.3499	2.40135	2.1607
GAGGAAUGG	2.2834	2.2288	2.0025	2.2944	2.325	2.317	2.24185	2.2889	2.2769	2.15975
GGCACCUGA	2.0424	2.6473	2.1949	2.5427	2.5417	2.1232	2.3487	2.29255	2.5945	2.15905
UGGGAGGGG	2.068	2.2032	2.2157	2.3044	2.2804	2.102	2.19562	2.1862	2.2418	2.15885
UGCCACCCG	2.2212	2.4466	1.8806	2.2845	2.6011	2.4364	2.31173	2.25285	2.52385	2.1585
CGGACCCGA	2.1446	2.3569	2.2782	2.3441	2.1735	2.0383	2.2226	2.24435	2.2652	2.15825
UUUCACCCG	2.1471	2.1772	2.1549	2.3447	2.0398	2.1615	2.17087	2.2459	2.1085	2.1582
ACCCAGAGA	2.0871	2.152	2.1026	2.4335	2.3161	2.2135	2.21747	2.2603	2.23405	2.15805
CUUGCCCCG	1.9666	2.1429	2.1065	2.3768	2.2825	2.2088	2.18068	2.1717	2.2127	2.15765
AGGCACCGG	2.5175	2.3124	2.0714	2.0729	2.3796	2.2432	2.26617	2.2952	2.346	2.1573
GCCCGAGUC	2.2472	2.3426	2.1564	2.031	1.8728	2.1555	2.13425	2.1391	2.1077	2.15595
GGAUGGAGA	2.1685	2.5939	2.3055	2.3242	2.1914	2.0064	2.26498	2.24635	2.39265	2.15595
AGUCGCGGG	1.9498	1.7392	2.2148	2.0841	2.0524	2.0965	2.0228	2.01695	1.8958	2.15565
UCCGGCGGG	2.7405	2.4519	2.324	1.9885	1.9398	1.9855	2.23837	2.3645	2.19585	2.15475
CCCGAGACA	2.0756	2.1417	2.0535	2.2567	2.4372	2.2549	2.20327	2.16615	2.28945	2.1542
GGAAGAAGG	2.2326	2.1061	2.2205	2.4763	2.1251	2.0877	2.20805	2.35445	2.1156	2.1541
CCGACGAGA	1.9638	2.11	2.053	2.3667	2.0672	2.2518	2.13542	2.16525	2.0886	2.1524
CUCCGAGAC	2.1571	2.2421	1.9806	2.2934	2.1563	2.3227	2.19203	2.22525	2.1992	2.15165
CCGGCCCGA	2.5865	2.1915	2.1777	2.48	2.5773	2.1248	2.3563	2.53325	2.3844	2.15125
GACCCGAAG	2.2329	2.1993	1.9788	2.4327	2.1598	2.3225	2.221	2.3328	2.17955	2.15065
GACACCCCC	2.2905	2.4166	2.4281	2.2812	2.1596	1.8722	2.24137	2.28585	2.2881	2.15015
GUCUUGGUG	1.9695	2.3277	2.0597	2.1114	1.2827	2.2385	1.99825	2.04045	1.8052	2.1491
CUGGAAAAG	2.1082	2.0828	2.1767	2.3838	2.17	2.1211	2.17377	2.246	2.1264	2.1489
CCCGGUCCG	2.8969	2.2882	2.2218	2.589	2.5005	2.0754	2.42863	2.74295	2.39435	2.1486
GCCCGUGAA	2.4589	2.2575	2.2579	2.3696	2.2017	2.0364	2.26367	2.41425	2.2296	2.14715
CCCCAGAGA	2.4251	2.2446	2.16	2.1282	2.2023	2.1342	2.21573	2.27665	2.22345	2.1471
CCCGGAAAG	2.2298	2.3257	2.1295	2.1392	2.0078	2.1635	2.16592	2.1845	2.16675	2.1465
CGGGGUUGC	2.2236	2.0231	2.4805	2.1224	1.6965	1.8123	2.05973	2.173	1.8598	2.1464
UUGAACCCG	2.292	2.2365	2.2985	2.0382	2.2929	1.9921	2.1917	2.1651	2.2647	2.1453
ACGUCCGAG	2.1829	2.2358	2.0642	1.9937	2.274	2.2236	2.16237	2.0883	2.2549	2.1439
CCCGAGGUC	2.4844	1.9598	1.898	2.3838	2.5922	2.3886	2.28447	2.4341	2.276	2.1433
AGAAAGAGA	2.1429	1.8746	1.9966	2.4253	2.3354	2.2868	2.17693	2.2841	2.105	2.1417
GCGGCCUGG	2.1292	2.029	2.3468	2.352	2.423	1.9364	2.20273	2.2406	2.226	2.1416
GCCCUGGAA	2.2926	2.3212	2.1694	2.4749	2.3637	2.1127	2.28908	2.38375	2.34245	2.14105
CCAGAGAAA	1.9625	1.9575	1.9947	2.233	2.1794	2.2872	2.10238	2.09775	2.06845	2.14095
CGAACGGGG	1.9322	2.0681	2.1618	2.1238	2.0019	2.1194	2.06787	2.028	2.035	2.1406
GAAGUCGAG	2.2483	1.8304	2.1988	1.9364	2.4274	2.0814	2.12045	2.09235	2.1289	2.1401
GACGCCCGC	2.5444	2.794	2.3231	2.4189	2.5844	1.9559	2.43678	2.48165	2.6892	2.1395
GAGAUGGUG	1.9189	1.9941	2.1407	2.5127	1.8721	2.1381	2.0961	2.2158	1.9331	2.1394
GGGCACCCG	2.2603	2.6381	1.9826	2.0623	1.9689	2.2931	2.20088	2.1613	2.3035	2.13785
GCGAGUUGG	2.4126	2.7976	1.8666	2.0024	1.8814	2.4077	2.22805	2.2075	2.3395	2.13715
CCCGAGGGC	2.5937	2.6262	2.0966	2.6666	2.4785	2.1765	2.43968	2.63015	2.55235	2.13655
GCCCGAGCU	2.1356	2.5679	2.1588	2.7764	2.5152	2.1132	2.37785	2.456	2.54155	2.136
AUCCCGAGG	2.2166	2.2605	1.9338	2.4119	2.5152	2.338	2.27933	2.31425	2.38785	2.1359
CCCGGAAUU	2.6807	2.3569	2.2753	2.6752	2.3279	1.9958	2.3853	2.67795	2.3424	2.13555
CCCCACCCG	2.3787	2.2949	2.1661	2.2092	2.3065	2.1047	2.24335	2.29395	2.3007	2.1354
CGCCCAGAA	2.1995	2.2086	2.0895	1.9008	2.3461	2.1799	2.15407	2.05015	2.27735	2.1347
CCCGAGGCU	2.2494	2.2652	2.0969	2.2834	2.1829	2.1724	2.20837	2.2664	2.22405	2.13465
UCCGAGAAC	2.3215	2.3322	2.0943	2.6469	2.5213	2.1745	2.34845	2.4842	2.42675	2.1344
CCUGGAAGG	2.3601	2.7043	2.4224	2.1818	2.7394	1.8461	2.37568	2.27095	2.72185	2.13425
CGAGAGGGG	2.3831	2.4506	2.2686	1.9615	2.4189	1.9982	2.24682	2.1723	2.43475	2.1334
CCGCCCGGU	2.4708	2.3955	2.3446	2.3962	2.4822	1.9208	2.33502	2.4335	2.43885	2.1327
CCCGAGAGU	2.4126	2.5209	2.201	2.5745	2.3517	2.0638	2.35408	2.49355	2.4363	2.1324
CCCCGAGGG	2.471	2.4547	2.0574	2.4205	2.23	2.2049	2.30642	2.44575	2.34235	2.13115
CGGGAAGCA	2.1415	2.029	2.0447	2.1168	2.2063	2.2166	2.12582	2.12915	2.11765	2.13065
GCUCGGGUG	3.2743	2.8821	2.1592	2.6818	2.4052	2.102	2.5841	2.97805	2.64365	2.1306
CACUCGAGC	2.3782	2.4902	2.1522	2.6282	2.6457	2.1068	2.40022	2.5032	2.56795	2.1295
CCUGAGGAU	2.3983	2.5939	2.0373	2.3838	1.8707	2.2214	2.2509	2.39105	2.2323	2.12935
GCACCGGGA	2.2351	2.5852	2.1908	2.2971	2.1962	2.0672	2.26193	2.2661	2.3907	2.129
AGUGACACC	2.022	2.2504	1.8874	2.3075	1.813	2.3695	2.1083	2.16475	2.0317	2.12845
GCCCGAAAG	2.1402	2.354	1.942	2.4655	2.5533	2.3149	2.29498	2.30285	2.45365	2.12845
GAGUGCCCG	2.3717	2.2979	1.9833	2.2545	2.2176	2.2736	2.2331	2.3131	2.25775	2.12845
CCCGGGGGC	2.5229	2.6008	2.3068	2.4887	2.3089	1.9491	2.36287	2.5058	2.45485	2.12795
GUGCUCGGG	2.4391	2.4121	2.3146	1.9254	2.0228	1.9403	2.17572	2.18225	2.21745	2.12745
GCCUUCGGC	2.0329	2.1416	2.4469	2.1091	2.0437	1.8073	2.09692	2.071	2.09265	2.1271
GACACCCUA	2.1572	2.9838	1.7843	2.3053	2.1731	2.4684	2.31202	2.23125	2.57845	2.12635
GGCACCGGU	2.2467	2.4082	1.9348	2.1454	1.9004	2.3143	2.1583	2.19605	2.1543	2.12455
UCCGAGACC	2.3346	2.4971	2.1605	2.3478	2.3719	2.0876	2.29992	2.3412	2.4345	2.12405
GACCCGGGC	2.1786	2.448	2.3217	2.4368	2.1854	1.925	2.24925	2.3077	2.3167	2.12335
GGCAUCCCG	2.5878	2.2528	2.3293	1.9227	1.9767	1.9172	2.16442	2.25525	2.11475	2.12325
GAGAUCGGG	2.0121	2.1437	2.2318	2.3967	2.0108	2.0142	2.13488	2.2044	2.07725	2.123
CGCGCGAGA	2.2584	2.1965	2.2545	2.4089	1.8566	1.9914	2.16105	2.33365	2.02655	2.12295
CGGGAGCCC	2.3622	2.137	2.273	2.0408	2.2057	1.9715	2.16503	2.2015	2.17135	2.12225
CGUCGGGGG	2.429	2.679	1.9502	2.0433	2.4433	2.2931	2.30632	2.23615	2.56115	2.12165
UGAACCCGG	2.2901	2.234	2.1917	2.2726	2.366	2.051	2.23423	2.28135	2.3	2.12135
CGAGAGAAG	1.9556	2.0451	2.1859	2.5186	2.0217	2.0563	2.13053	2.2371	2.0334	2.1211
GAAAAAAAG	1.9616	1.8344	1.908	2.2814	2.2439	2.3341	2.0939	2.1215	2.03915	2.12105
CCCGCCCGA	2.4863	2.5124	2.3115	2.7619	2.1939	1.9293	2.36588	2.6241	2.35315	2.1204
CGGGAGGGC	2.3874	1.7996	2.2832	2.6164	2.0023	1.9575	2.1744	2.5019	1.90095	2.12035
AUGGGAAGG	2.3219	2.6212	2.3095	2.4465	2.0929	1.931	2.28717	2.3842	2.35705	2.12025
UGGCGUCCG	2.3102	2.4926	2.1008	2.0875	2.3575	2.1381	2.24778	2.19885	2.42505	2.11945
GGACCCGAA	2.2529	2.4069	2.29	2.535	1.9085	1.9482	2.22358	2.39395	2.1577	2.1191
GGCGCUCGG	2.0848	2.0245	2.0551	2.1629	1.7833	2.1812	2.04863	2.12385	1.9039	2.11815
CAGAGGGGG	2.2915	1.8196	1.9427	2.0875	1.9068	2.2931	2.05687	2.1895	1.8632	2.1179
CCCGGGGCU	1.9941	1.9928	2.1266	2.3498	2.0157	2.1088	2.09797	2.17195	2.00425	2.1177
CGACGCCUG	2.3861	2.3885	2.1753	2.4388	2.105	2.0579	2.2586	2.41245	2.24675	2.1166
AUCCCCGGG	2.3135	2.1225	2.0495	1.9593	1.9329	2.1831	2.09347	2.1364	2.0277	2.1163
CGCGCCCGA	2.3609	2.64	2.0373	2.5924	2.1005	2.1927	2.32063	2.47665	2.37025	2.115
CGACACCUG	2.4406	2.5425	2.0444	2.7446	2.4095	2.1846	2.39437	2.5926	2.476	2.1145
GCCCGAAAC	2.1794	2.1759	1.9769	2.5523	2.4196	2.2519	2.25933	2.36585	2.29775	2.1144
CACCGAGAA	2.0265	1.9763	1.9006	2.1616	2.3533	2.3276	2.12432	2.09405	2.1648	2.1141
UUGGCGCCC	2.2681	2.3801	2.1569	2.676	2.3172	2.0712	2.31158	2.47205	2.34865	2.11405
CCCAGAGAG	2.2046	1.9638	1.9742	2.0591	2.3001	2.2535	2.12588	2.13185	2.13195	2.11385
GGUCGCCCG	2.5666	2.551	2.0806	2.465	1.8013	2.1467	2.26853	2.5158	2.17615	2.11365
CACCCGUGC	2.3422	2.0528	2.094	2.3377	2.2207	2.1328	2.1967	2.33995	2.13675	2.1134
GUCGCCCGC	2.1068	2.4291	2.1757	2.2361	1.608	2.0508	2.10108	2.17145	2.01855	2.11325
GAGACGCCC	2.1166	2.1267	2.1082	2.4231	2.0524	2.1177	2.15745	2.26985	2.08955	2.11295
CCGAGAGCU	2.3717	2.548	2.2241	2.6909	2.6959	2.0016	2.42203	2.5313	2.62195	2.11285
CCGGGAAAC	2.3983	2.1424	2.0982	2.7712	2.1246	2.1259	2.27677	2.58475	2.1335	2.11205
GCCGCGGGG	2.5759	1.9416	1.8696	2.4465	2.498	2.3534	2.28083	2.5112	2.2198	2.1115
GAGGAAGGU	2.6732	2.4294	2.1813	2.1629	2.4716	2.0414	2.32663	2.41805	2.4505	2.11135
ACCGGAGAA	1.951	2.1328	2.0112	2.3115	2.2334	2.2112	2.14185	2.13125	2.1831	2.1112
GGCACCCGU	2.1446	2.8693	2.2157	2.1852	2.0666	2.0064	2.24797	2.1649	2.46795	2.11105
CAACGCCCG	2.0578	1.947	2.0389	2.2779	2.0049	2.1827	2.08487	2.16785	1.97595	2.1108
GCGCCCGCG	2.5367	2.3241	1.9279	2.5173	2.1379	2.2931	2.2895	2.527	2.231	2.1105
CCCGAGCCA	2.228	2.2892	2.0298	2.6435	2.5655	2.1907	2.32445	2.43575	2.42735	2.11025
CGGCGAGGC	2.1541	2.3922	2.1065	2.0784	2.2047	2.1139	2.17497	2.11625	2.29845	2.1102
CACCCGCAG	2.2649	2.0587	2.0597	2.4519	2.6457	2.16	2.27348	2.3584	2.3522	2.10985
UGGGACCCG	2.4061	2.0012	2.2078	2.4018	2.154	2.0118	2.19712	2.40395	2.0776	2.1098
AGACCCGAA	2.3938	2.1632	2.1275	2.3405	2.0602	2.0916	2.19613	2.36715	2.1117	2.10955
GGGCUCAGG	2.6828	2.368	1.9879	2.4354	2.2535	2.2311	2.32645	2.5591	2.31075	2.1095
CUGAGACCC	2.4497	2.2866	2.314	2.6596	1.887	1.9046	2.25025	2.55465	2.0868	2.1093
GGCCGAGGA	2.0906	2.3284	2.4127	2.3916	2.3552	1.8044	2.23048	2.2411	2.3418	2.10855
AGACGCUCG	2.2834	2.2625	1.9589	2.2795	1.864	2.2572	2.15092	2.28145	2.06325	2.10805
CGAGGGUUC	2.2288	2.5209	2.2288	2.2885	1.9669	1.9873	2.20353	2.25865	2.2439	2.10805
UCCACCCGA	2.068	2.3018	1.8457	2.7524	2.1882	2.3701	2.25437	2.4102	2.245	2.1079
GCGGGUGGG	1.9591	2.1358	1.9217	2.3336	1.6878	2.2931	2.05518	2.14635	1.9118	2.1074
CACCCAGAA	2.2099	1.9169	2.0281	2.2716	2.3391	2.1863	2.15865	2.24075	2.128	2.1072
GACGCUCGC	2.4589	2.464	2.1082	2.2628	2.1826	2.1048	2.26355	2.36085	2.3233	2.1065
GAGAGAGGG	2.5439	2.152	2.4079	2.1114	2.2601	1.8017	2.21283	2.32765	2.20605	2.1048
CACCUCGAG	2.2044	1.8926	2.1418	2.3838	2.2448	2.0662	2.1556	2.2941	2.0687	2.104
CGGGUAGAG	2.1642	2.5524	2.2078	2.1288	2.1479	1.9998	2.20015	2.1465	2.35015	2.1038
CCCGGGAGU	2.2977	2.6131	2.8696	2.5268	2.3089	1.3376	2.32562	2.41225	2.461	2.1036
CCCGGGGUA	2.2259	1.8446	2.1766	2.0858	1.9241	2.0303	2.04788	2.15585	1.88435	2.10345
CCCAGGGAA	2.4348	2.3607	2.124	2.4144	2.236	2.0827	2.27543	2.4246	2.29835	2.10335
CGGCACCCC	2.4238	2.2908	2.2648	2.2723	2.4414	1.9417	2.27247	2.34805	2.3661	2.10325
CUCCCGAGA	2.4836	2.2921	1.9297	2.2716	2.5278	2.2762	2.29683	2.3776	2.40995	2.10295
CACCCGGUC	2.1631	2.2898	2.163	2.1208	2.3001	2.0427	2.17992	2.14195	2.29495	2.10285
AUGACACCC	2.1446	2.5765	1.8368	2.5427	1.975	2.3659	2.24025	2.34365	2.27575	2.10135
AUCCGGGAU	2.359	2.234	2.266	2.7334	2.3375	1.9364	2.31105	2.5462	2.28575	2.1012
UCGGGAAAG	2.2058	2.1212	2.1174	2.0024	1.7531	2.0829	2.04713	2.1041	1.93715	2.10015
CCGUGGAGG	2.3954	2.2826	1.9642	2.6103	1.7638	2.2357	2.20867	2.50285	2.0232	2.09995
GGCUCCGAG	2.6307	2.3339	1.8593	2.1017	2.3561	2.3399	2.27027	2.3662	2.345	2.0996
CCCGGGCAA	2.1052	2.0107	2.2469	2.3838	1.9761	1.9522	2.11248	2.2445	1.9934	2.09955
GGAGAGGUU	2.2977	2.275	1.8666	2.0978	1.7958	2.3313	2.1107	2.19775	2.0354	2.09895
GGCCCGUGA	2.6096	2.6021	2.3134	2.0433	1.9928	1.8836	2.2408	2.32645	2.29745	2.0985
CGGCGGGGG	2.2518	2.0905	2.2846	2.1454	1.8386	1.9109	2.08697	2.1986	1.96455	2.09775
UGACACCCU	2.1664	3.1245	1.9718	2.4227	1.911	2.2229	2.30322	2.29455	2.51775	2.09735
CACCUGGGG	1.9554	2.3528	1.9947	2.4811	1.9372	2.1995	2.15345	2.21825	2.145	2.0971
GAGGCCCGG	2.3098	2.3947	2.0822	2.1329	2.0929	2.112	2.18742	2.22135	2.2438	2.0971
GCUCGGGAA	2.3142	2.0861	2.0099	2.3498	2.2906	2.1839	2.20575	2.332	2.18835	2.0969
ACCCGAGCG	2.0071	2.5227	1.8669	2.2716	2.5089	2.3268	2.25067	2.13935	2.5158	2.09685
GCACCCGCC	2.1642	2.3379	2.0336	2.4171	2.0882	2.1598	2.20013	2.29065	2.21305	2.0967
UGGCACUCG	2.4329	2.8211	2.237	2.6923	2.3769	1.9559	2.41935	2.5626	2.599	2.09645
CUGGCCCGA	2.4356	2.9267	2.0505	2.6508	2.3432	2.1402	2.4245	2.5432	2.63495	2.09535
UGCACCCGU	2.2288	2.3826	1.992	2.36	1.5821	2.1975	2.12383	2.2944	1.98235	2.09475
CACCCGGCG	2.2883	2.1488	2.18	2.315	2.3936	2.0094	2.22252	2.30165	2.2712	2.0947
GUGCCCGUG	2.359	2.1725	2.3031	2.1613	2.0809	1.8854	2.16037	2.26015	2.1267	2.09425
GGAGACACC	2.121	2.331	2.1852	2.279	2.1426	2.0033	2.17702	2.2	2.2368	2.09425
AGGCCCCGG	2.0284	2.0248	2.0403	2.2523	2.0494	2.1481	2.09055	2.14035	2.0371	2.0942
GAGAGAGAG	2.0033	2.1616	2.0187	2.1231	2.1045	2.1677	2.09648	2.0632	2.13305	2.0932
GGCAGCCGG	2.585	2.2702	2.0252	2.1454	2.0475	2.1608	2.20568	2.3652	2.15885	2.093
GAACCCGAA	2.1296	2.0816	1.8923	2.2693	2.0352	2.2931	2.11685	2.19945	2.0584	2.0927
CCGGGAUGC	2.332	2.5902	2.0629	2.5258	2.1288	2.1223	2.29367	2.4289	2.3595	2.0926
AGGGAGAGA	1.9261	1.8174	1.9082	2.2716	2.1694	2.2762	2.06148	2.09885	1.9934	2.0922
CCCGGAAGG	2.1798	2.7668	2.1234	2.0295	2.4442	2.0607	2.2674	2.10465	2.6055	2.09205
GGGCACCCA	2.1879	2.035	2.0895	2.161	1.6871	2.0937	2.04237	2.17445	1.86105	2.0916
CCCGGAGUU	2.1446	2.4389	2.3218	2.5427	2.423	1.8599	2.28848	2.34365	2.43095	2.09085
GCACCGAGA	2.2328	2.0551	1.8261	2.5652	2.0496	2.3554	2.1807	2.399	2.05235	2.09075
CGGCACCGG	2.4268	2.5015	1.935	2.1356	2.3195	2.246	2.26073	2.2812	2.4105	2.0905
GAAGACCGG	2.2178	2.4761	2.0986	1.8967	2.2169	2.0812	2.16455	2.05725	2.3465	2.0899
AGACGCCCU	2.1241	2.3808	1.9399	2.212	1.9987	2.2397	2.1492	2.16805	2.18975	2.0898
GAGCCCGGA	2.367	2.3446	2.1348	2.7055	2.1482	2.0444	2.29075	2.53625	2.2464	2.0896
CGGUCCGGC	2.2488	2.1469	1.9046	2.1103	1.8295	2.2743	2.08573	2.17955	1.9882	2.08945
GGAGUUUUG	2.6807	1.947	2.3527	2.2779	1.9479	1.826	2.17203	2.4793	1.94745	2.08935
GUUCCCGAG	2.3186	2.138	1.9376	2.308	2.1573	2.241	2.18342	2.3133	2.14765	2.0893
GCACCCAGG	2.1177	2.3009	2.0269	2.374	2.1159	2.1512	2.1811	2.24585	2.2084	2.08905
GGAACGGCG	2.2014	2.1421	2.2917	2.0762	2.0069	1.8862	2.10075	2.1388	2.0745	2.08895
GGCCCAAGG	2.1594	2.0045	2.2355	2.1017	2.1074	1.9421	2.09177	2.13055	2.05595	2.0888
AAAGACCCG	2.1575	2.0478	1.9613	2.1414	2.2104	2.2153	2.12228	2.14945	2.1291	2.0883
GCGCCCGAC	2.2298	2.3622	1.9872	2.2768	2.2121	2.1878	2.20932	2.2533	2.28715	2.0875
UUCCCGGGG	2.336	2.2801	2.136	2.1852	2.3161	2.0383	2.21528	2.2606	2.2981	2.08715
CCACGCCCG	2.2369	2.2171	2.0702	2.3301	2.1577	2.1032	2.18587	2.2835	2.1874	2.0867
CAGGCACCC	2.357	2.4396	2.1749	2.2146	2.1517	1.9972	2.2225	2.2858	2.29565	2.08605
GCGAGGCGG	2.1829	2.2618	2.2885	1.9752	2.4433	1.8836	2.17255	2.07905	2.35255	2.08605
GGUCCGGGG	2.1475	2.1993	2.0525	2.5855	2.4175	2.1167	2.25317	2.3665	2.3084	2.0846
GACCCGCGG	2.1947	2.8304	2.3633	2.4496	1.843	1.8055	2.24775	2.32215	2.3367	2.0844
GCGCCCGUG	2.6674	2.5663	2.3984	2.3009	2.5655	1.7697	2.37803	2.48415	2.5659	2.08405
CCUCCGGGG	2.2212	1.9763	1.9104	2.0433	2.0157	2.2567	2.0706	2.13225	1.996	2.08355
AGUCCGAGG	2.0799	1.8605	2.1307	2.1208	1.9684	2.0361	2.03273	2.10035	1.91445	2.0834
CGAGGAUGC	2.3541	2.3492	2.1763	2.051	2.0088	1.9902	2.15493	2.20255	2.179	2.08325
GCGGCCGAG	2.0797	1.8446	2.0851	2.0848	1.8045	2.0793	1.99633	2.08225	1.82455	2.0822
UCCGAGAAG	2.5704	1.9227	1.6575	2.303	2.4785	2.5068	2.23982	2.4367	2.2006	2.08215
GGCACCCUC	2.2126	2.2089	2.0121	2.1896	1.9162	2.1515	2.11515	2.2011	2.06255	2.0818
CCACCUGGG	2.1401	2.37	2.0967	2.345	1.9987	2.0664	2.16948	2.24255	2.18435	2.08155
CGACGCUCG	2.2678	2.0183	2.1683	2.4253	1.8776	1.994	2.12522	2.34655	1.94795	2.08115
CGCCCGGGG	2.4367	2.7668	2.0798	2.4282	1.9987	2.0798	2.29833	2.43245	2.38275	2.0798
CGGCCGGGG	2.5168	2.2306	2.0798	1.8627	1.8197	2.0798	2.09823	2.18975	2.02515	2.0798
CCGGAGAAA	2.3124	2.2135	1.9072	2.4575	2.274	2.2514	2.236	2.38495	2.24375	2.0793
CGGAACCCG	2.1808	2.0793	2.1883	2.4315	2.0174	1.97	2.14455	2.30615	2.04835	2.07915
GGAAGGAUG	2.1729	2.5663	2.0638	2.2076	1.8126	2.0937	2.15282	2.19025	2.18945	2.07875
GACCGCCCG	1.9803	2.1963	2.0089	2.0848	1.9024	2.1473	2.05333	2.03255	2.04935	2.0781
CGCAGGGGU	2.0519	1.8231	2.1294	2.1953	1.6407	2.0264	1.9778	2.1236	1.7319	2.0779
CCCGAGAGG	2.0993	2.3057	1.9661	2.568	2.0407	2.1888	2.19477	2.33365	2.1732	2.07745
GUUGGUUUG	2.068	2.2545	2.4342	2.6222	1.8529	1.7198	2.1586	2.3451	2.0537	2.077
CGACACCGG	2.2097	2.1031	1.9997	2.2858	2.1459	2.1538	2.14967	2.24775	2.1245	2.07675
GAGAGAUGG	2.112	2.0212	2.0796	2.2519	2.2107	2.0735	2.12482	2.18195	2.11595	2.07655
GCACCCGAU	2.2225	2.4965	2.0175	2.6386	2.2338	2.1349	2.29063	2.43055	2.36515	2.0762
CCGAGCCCG	2.6953	2.5086	2.123	2.5745	2.5014	2.0294	2.40537	2.6349	2.505	2.0762
CCGGGCGAA	2.045	2.029	2.2407	2.1772	1.9669	1.9109	2.06162	2.1111	1.99795	2.0758
CGGGAAAGA	2.2044	2.3345	2.0721	2.0411	2.2314	2.0781	2.16027	2.12275	2.28295	2.0751
GGAGGAAGG	2.1917	2.6486	2.1217	2.0538	2.3682	2.0285	2.23542	2.12275	2.5084	2.0751
GGAGGAAGU	1.9454	1.8651	2.0597	2.2567	1.7103	2.0892	1.98773	2.10105	1.7877	2.07445
CGCCCUGAG	2.0595	2.1975	2.025	2.1013	1.9637	2.1232	2.07837	2.0804	2.0806	2.0741
CCCGACGCC	2.3282	2.4737	2.2417	2.2638	2.4041	1.9058	2.26955	2.296	2.4389	2.07375
CACCCGGCU	2.4433	2.6029	2.1453	2.066	2.3945	2.0001	2.27535	2.25465	2.4987	2.0727
GGCAACCCG	2.19	2.2481	2.0547	2.1603	1.9909	2.09	2.12233	2.17515	2.1195	2.07235
CGGGAGCGA	2.0926	1.9598	2.0564	2.171	1.3744	2.0883	1.95708	2.1318	1.6671	2.07235
ACCCGACGC	2.0211	2.1896	1.9986	2.1795	2.0332	2.1449	2.09448	2.1003	2.1114	2.07175
GGGAGAGAC	1.9979	2.4073	2.1993	2.1091	2.0654	1.9433	2.12038	2.0535	2.23635	2.0713
UCGAGGAAG	2.1132	2.5703	1.9799	2.4854	1.8295	2.1615	2.18997	2.2993	2.1999	2.0707
GGCACGAGA	2.3452	2.035	1.9351	2.4719	1.9799	2.2058	2.16215	2.40855	2.00745	2.07045
GAGCACGGG	2.1634	1.9155	2.3766	2.2665	1.6774	1.7639	2.02722	2.21495	1.79645	2.07025
CCCGGAGCC	2.1471	2.0865	2.0996	2.2744	1.9136	2.0393	2.09342	2.21075	2.00005	2.06945
CCUUGGCAC	2.2857	2.2329	2.1775	2.2584	1.8566	1.9612	2.12872	2.27205	2.04475	2.06935
CCCGAGCUG	2.3592	2.3382	1.9424	2.2562	2.0777	2.1962	2.19498	2.3077	2.20795	2.0693
CCCGAGCAG	2.0767	2.4049	2.0052	2.5709	2.0784	2.1334	2.21158	2.3238	2.24165	2.0693
CGCCUGAGG	2.2761	1.9664	2.0186	2.2939	1.8878	2.12	2.0938	2.285	1.9271	2.0693
ACCGACACC	2.0484	2.007	1.8512	2.3649	2.1136	2.2866	2.11195	2.20665	2.0603	2.0689
CCCACCCGG	2.2861	2.3757	2.0842	2.417	2.4924	2.0536	2.28483	2.35155	2.43405	2.0689
CGCCUGAGA	2.3582	2.4918	2.1262	2.434	2.0479	2.0115	2.24493	2.3961	2.26985	2.06885
CACGGGAAU	2.204	2.0994	2.3425	2.2772	2.1435	1.7952	2.14363	2.2406	2.12145	2.06885
GGGAGAAGC	1.9979	2.1416	1.9804	2.0848	2.0872	2.157	2.07482	2.04135	2.1144	2.0687
CCCGGGGUU	2.5357	2.6021	2.0895	2.9117	1.9241	2.0474	2.35175	2.7237	2.2631	2.06845
AGGGCACCC	2.3345	2.1643	2.0728	1.9261	1.8814	2.0638	2.07382	2.1303	2.02285	2.0683
CACCCCGGA	2.34	2.4531	2.28	2.3838	2.1205	1.8563	2.23895	2.3619	2.2868	2.06815
UGCGGAGGA	2.4126	1.8203	2.2655	1.9572	2.4642	1.8707	2.13175	2.1849	2.14225	2.0681
CCGAGUCUG	2.0133	2.1373	1.9884	2.4292	1.9954	2.1475	2.11852	2.22125	2.06635	2.06795
GGUCGAGAG	1.927	2.3476	2.2852	2.308	2.1865	1.8501	2.15073	2.1175	2.26705	2.06765
AGCCGGGGG	2.4778	2.044	2.2138	2.474	2.0455	1.9212	2.19605	2.4759	2.04475	2.0675
UGGCCUGGG	2.1792	2.4693	2.2109	2.2146	2.1103	1.9232	2.18458	2.1969	2.2898	2.06705
UUGAGCCCG	2.4346	2.7668	2.4007	2.5867	2.5655	1.732	2.41438	2.51065	2.66615	2.06635
CGGGGCGCC	2.1336	2.1081	2.1667	2.2022	1.9139	1.9655	2.08167	2.1679	2.011	2.0661
GGGUCGUGG	3.0006	2.1701	2.3108	2.7764	1.4337	1.821	2.2521	2.8885	1.8019	2.0659
UGCCCGAAA	2.0736	2.212	1.941	2.5234	2.5029	2.1905	2.24057	2.2985	2.35745	2.06575
CACCCGCCG	2.2174	2.367	2.1334	2.1704	2.1977	1.9964	2.18038	2.1939	2.28235	2.0649
GCCCUGAGA	2.2551	2.1212	2.0657	2.8197	2.1074	2.0638	2.23882	2.5374	2.1143	2.06475
GAGGGAAGG	2.1463	2.2009	1.9661	2.308	2.099	2.1628	2.14718	2.22715	2.14995	2.06445
CCACCCGGC	2.2423	2.2677	1.9961	2.3053	2.5202	2.1312	2.2438	2.2738	2.39395	2.06365
CCGACGCCG	2.1965	2.3135	2.2029	2.2424	2.0437	1.9238	2.1538	2.21945	2.1786	2.06335
GAAGAGAAG	1.9531	1.974	1.8527	2.2834	2.1829	2.273	2.08652	2.11825	2.07845	2.06285
UGACCCGGC	2.061	2.3197	2.1789	2.5572	2.0213	1.9456	2.18062	2.3091	2.1705	2.06225
CACCUGAGC	2.0093	2.0604	2.0975	2.5563	2.3472	2.0247	2.18257	2.2828	2.2038	2.0611
GGCACGCGG	2.0461	2.0641	2.2291	2.2476	1.8732	1.8927	2.0588	2.14685	1.96865	2.0609
GGCACCCAA	2.2121	2.2805	1.9224	2.1584	1.9591	2.1993	2.12197	2.18525	2.1198	2.06085
CCGCGGCGG	2.3917	1.9144	1.9502	1.8637	2.1573	2.1715	2.0748	2.1277	2.03585	2.06085
CGGGAAGAA	2.2467	2.3	1.9399	2.4721	2.1696	2.1798	2.21802	2.3594	2.2348	2.05985
GGUCCGAGG	2.1405	2.4756	2.2765	2.296	2.0591	1.8405	2.18137	2.21825	2.26735	2.0585
UGCCCUGGG	2.3131	2.0495	1.9502	2.0342	1.8244	2.1657	2.05618	2.17365	1.93695	2.05795
CACCUGGGU	2.0169	2.2886	1.7164	2.3573	2.1617	2.3992	2.15668	2.1871	2.22515	2.0578
GACCCCCGA	2.1589	2.1584	2.1728	2.1057	1.8974	1.9427	2.07265	2.1323	2.0279	2.05775
CGACCCGGG	2.0113	1.9456	2.0238	2.3512	1.8802	2.0889	2.05017	2.18125	1.9129	2.05635
GGCUCUGAG	2.2293	2.2763	2.2585	1.9781	1.6921	1.854	2.04805	2.1037	1.9842	2.05625
CCCCGGGAA	2.5475	2.2856	2.1683	2.4253	1.9148	1.9441	2.21427	2.4864	2.1002	2.0562
CCACGAGGA	2.1008	2.1886	2.2648	2.1568	2.4841	1.8472	2.17372	2.1288	2.33635	2.056
ACCCGCGGU	2.0945	2.2702	2.0669	2.1821	1.8254	2.0432	2.08038	2.1383	2.0478	2.05505
CCCGCCCGG	2.407	2.283	2.1443	2.2158	2.1239	1.9641	2.18968	2.3114	2.20345	2.0542
CCGGGAAAA	2.2005	2.2259	2.1458	2.2555	2.1215	1.9623	2.15192	2.228	2.1737	2.05405
AGCCCGGGG	2.606	2.0245	2.0386	2.442	2.2526	2.0694	2.23885	2.524	2.13855	2.054
AGGCACCCU	2.1411	2.3756	2.1618	2.3621	2.2545	1.9456	2.20678	2.2516	2.31505	2.0537
GCCCGGGCU	2.6923	2.4188	2.2236	2.4018	2.5897	1.882	2.36803	2.54705	2.50425	2.0528
CCGAGAAGG	2.4471	2.1827	1.9642	2.1454	2.2662	2.1402	2.19097	2.29625	2.22445	2.0522
UGACACCGG	2.1933	2.3616	1.9502	2.0804	1.8658	2.1541	2.1009	2.13685	2.1137	2.05215
GGAGAGAGA	2.3505	2.2377	2.0553	2.6027	2.3552	2.0487	2.27502	2.4766	2.29645	2.052
GGGUCUUAG	2.3388	2.2069	2.1791	2.1965	1.3286	1.9245	2.02907	2.26765	1.76775	2.0518
GCUCGAGGU	2.4773	2.5074	2.4552	2.5477	2.7659	1.6481	2.40027	2.5125	2.63665	2.05165
CCGACGCCC	2.1615	2.2398	1.9982	2.3395	2.1349	2.1047	2.1631	2.2505	2.18735	2.05145
CUACCCGGG	2.2058	2.3554	2.2503	2.3765	2.0524	1.8521	2.18208	2.29115	2.2039	2.0512
CCAGCCCGA	2.3779	2.315	1.9241	2.275	2.3417	2.1776	2.23522	2.32645	2.32835	2.05085
GGGAGGAAG	2.021	2.138	2.0171	2.2104	1.3702	2.0846	1.97355	2.1157	1.7541	2.05085
CUGAGAAAG	2.0942	2.1432	2.1025	2.3974	2.199	1.9982	2.15575	2.2458	2.1711	2.05035
CGGCCCGGC	2.2286	2.3281	1.9962	2.1385	2.0549	2.1038	2.14168	2.18355	2.1915	2.05
GGAAACCCG	2.1159	1.9248	1.8855	2.189	2.1862	2.2133	2.08578	2.15245	2.0555	2.0494
CCCCGCGGG	2.3383	2.0616	2.0977	2.0333	1.899	2.0008	2.07178	2.1858	1.9803	2.04925
GCACCCGAG	2.3634	3.0303	2.786	2.3157	2.8098	1.3103	2.43592	2.33955	2.92005	2.04815
AGACGCCCA	2.0503	2.2545	2.1749	2.1882	2.116	1.9207	2.11743	2.11925	2.18525	2.0478
CCCGGGCGG	2.27	2.6396	2.0175	2.4167	2.1011	2.0756	2.25342	2.34335	2.37035	2.04655
CCCGGGGGG	2.3474	1.695	2.0782	2.3967	2.7388	2.0142	2.21172	2.37205	2.2169	2.0462
CCCCGAGGU	2.7942	2.3057	2.0448	2.4008	2.6571	2.0474	2.375	2.5975	2.4814	2.0461
CCGCGGAGA	2.0514	1.9001	1.9492	2.2747	2.1173	2.1411	2.0723	2.16305	2.0087	2.04515
CGAACCCGG	2.2181	2.0528	2.0558	2.157	2.0793	2.0342	2.09953	2.18755	2.06605	2.045
GGAAGGUGC	2.068	2.1739	2.2336	2.4179	2.3822	1.8563	2.18865	2.24295	2.27805	2.04495
CACCCAGGA	2.2285	1.813	2.0552	2.263	2.1438	2.0339	2.08957	2.24575	1.9784	2.04455
CACCGGGAA	2.231	2.2908	2.1659	2.4453	2.6069	1.9232	2.27718	2.33815	2.44885	2.04455
CGCGGGGGC	2.538	1.7607	2.1085	2.1454	2.0699	1.9804	2.10048	2.3417	1.9153	2.04445
UGAGGCCCG	2.201	1.9255	2.0969	2.3336	1.9804	1.9914	2.08813	2.2673	1.95295	2.04415
GCCUCGAGA	2.3339	2.4902	2.0895	2.2272	1.9608	1.9982	2.1833	2.28055	2.2255	2.04385
CCGGGGGCC	2.3126	2.5735	2.0895	2.1916	2.131	1.9972	2.2159	2.2521	2.35225	2.04335
GCGGGCUGU	2.8004	1.931	2.5074	2.4583	2.2849	1.5765	2.25975	2.62935	2.10795	2.04195
AGUCGCCCG	2.2188	1.9887	2.0765	2.056	1.9843	2.0064	2.05512	2.1374	1.9865	2.04145
CCGAGGGAA	2.0408	2.4756	2.1656	2.2584	1.9241	1.9159	2.13007	2.1496	2.19985	2.04075
CUGACCCGG	2.3158	2.3005	1.9158	2.3142	2.1908	2.1642	2.20022	2.315	2.24565	2.04
CCCGGAGAA	2.4088	2.5439	2.1125	2.7034	2.5232	1.9655	2.37622	2.5561	2.53355	2.039
GGAGCCUGG	2.198	1.8794	2.0659	2.051	1.5006	2.0118	1.95112	2.1245	1.69	2.03885
CCAGGGAAA	2.0274	1.7971	2.1891	2.0823	2.0184	1.8884	2.00045	2.05485	1.90775	2.03875
GGGAACGGC	2.1903	2.1718	2.1165	1.9378	1.8	1.9602	2.02943	2.06405	1.9859	2.03835
ACUCGGGAG	2.6194	2.275	1.9874	2.2567	2.0524	2.0892	2.21335	2.43805	2.1637	2.0383
GGUGGCGGG	2.1829	2.2032	2.2288	2.94	1.354	1.8472	2.12602	2.56145	1.7786	2.038
GACGCCCAA	2.0873	1.8639	2.023	2.0804	1.8838	2.0525	1.99848	2.08385	1.87385	2.03775
GCCCGGGGA	2.121	2.6959	1.9877	2.2371	1.9735	2.0873	2.18375	2.17905	2.3347	2.0375
CUCCCGGGA	2.1422	2.0574	2.1346	2.6625	1.638	1.9403	2.09583	2.40235	1.8477	2.03745
GUUCCUGAG	2.2873	2.0961	1.9376	2.1129	2.1282	2.1367	2.11647	2.2001	2.11215	2.03715
AAGCCCGGC	2.2571	2.1221	2.1228	2.4682	2.259	1.9481	2.19622	2.36265	2.19055	2.03545
GAUGCCGGG	1.9331	1.7844	2.0516	2.1765	1.7847	2.0189	1.9582	2.0548	1.78455	2.03525
GGGAGUGGU	1.9531	1.8958	1.9037	2.4633	2.0666	2.1657	2.0747	2.2082	1.9812	2.0347
CCGAGACUC	2.1972	2.421	2.1331	2.5477	1.844	1.9348	2.17963	2.37245	2.1325	2.03395
CCGGGGGCG	2.8103	2.3412	1.9502	2.3105	1.9077	2.1167	2.23943	2.5604	2.12445	2.03345
AUCCGAGAA	2.2886	1.9552	1.8499	2.6127	2.5484	2.2166	2.24523	2.45065	2.2518	2.03325
ACUCGGGAU	1.9558	2.6167	1.9334	2.5945	2.297	2.1331	2.25508	2.27515	2.45685	2.03325
GCAGGAGAA	1.9301	2.1766	1.8762	2.1454	2.4757	2.1899	2.13232	2.03775	2.32615	2.03305
GCCGCCGGC	1.9244	2.2481	2.0948	2.205	2.2448	1.9706	2.11462	2.0647	2.24645	2.0327
AGACUUCGG	2.1117	2.2691	2.3183	2.1341	2.1786	1.7471	2.12648	2.1229	2.22385	2.0327
CCCACCGGG	2.3556	2.1866	1.9539	2.0744	2.1322	2.1108	2.13558	2.215	2.1594	2.03235
CCAGGAGAG	1.9781	1.9348	2.1554	2.0832	1.7429	1.9067	1.96685	2.03065	1.83885	2.03105
CCCGCGGAA	2.4481	2.1807	2.1325	2.0318	1.9061	1.9288	2.10467	2.23995	2.0434	2.03065
CAUCCGAGU	2.0329	1.8289	1.9423	2.3757	2.6525	2.1182	2.15842	2.2043	2.2407	2.03025
CCGCCCCGG	2.304	2.2362	2.1754	2.0377	1.8538	1.8847	2.08197	2.17085	2.045	2.03005
GGGCGGGUG	2.3437	2.1674	2.3403	2.217	2.5655	1.7198	2.22562	2.28035	2.36645	2.03005
GGAACCCGA	2.3491	2.1311	2.0449	2.1663	1.8183	2.0148	2.08742	2.2577	1.9747	2.02985
GGCCGGGGA	2.6689	2.152	2.2074	2.5305	2.3353	1.8521	2.29103	2.5997	2.24365	2.02975
GACCCGGGA	2.2895	2.3551	2.0298	1.9411	2.4052	2.0269	2.1746	2.1153	2.38015	2.02835
CCGAGAAAG	2.0826	1.8249	1.739	2.4193	2.4427	2.3175	2.13767	2.25095	2.1338	2.02825
CCCGAUUCC	2.1495	1.9437	2.0839	2.1685	2.0414	1.9725	2.05992	2.159	1.99255	2.0282
AGCCCGGAA	2.1375	2.3269	1.9944	2.2963	2.1536	2.0617	2.16173	2.2169	2.24025	2.02805
CCUGGCUCC	2.1268	2.3057	2.014	2.2152	1.9398	2.0414	2.10715	2.171	2.12275	2.0277
CCCGGAGGG	2.3511	2.3716	2.0895	2.2476	2.3364	1.9655	2.22695	2.29935	2.354	2.0275
GAUGCCUGA	2.1358	2.404	2.0812	2.4854	2.0818	1.9735	2.19362	2.3106	2.2429	2.02735
CACCCGAUC	1.946	2.1874	1.9338	2.1011	1.8276	2.1206	2.01942	2.02355	2.0075	2.0272
CGCCUGAGU	1.9449	1.894	1.9661	2.4264	1.718	2.0883	2.00628	2.18565	1.806	2.0272
ACUCCGAGA	2.0831	2.1385	1.9753	2.7034	2.2131	2.0789	2.19872	2.39325	2.1758	2.0271
CCGCGGAGC	2.0434	2.0422	1.9794	2.1114	2.2295	2.0747	2.0801	2.0774	2.13585	2.02705
GGCUCGGGU	2.6778	2.4476	2.0252	2.1454	2.2201	2.0285	2.25743	2.4116	2.33385	2.02685
GGGAAGGGU	2.4126	2.0929	2.0252	2.3655	1.6774	2.0285	2.10035	2.38905	1.88515	2.02685
ACACCCAAG	1.9784	1.9875	1.8453	2.124	2.0652	2.2071	2.03458	2.0512	2.02635	2.0262
CGGCCCUGA	2.0155	1.9587	2.0757	2.1795	1.8691	1.9764	2.01248	2.0975	1.9139	2.02605
UGGGAAGGA	2.244	2.1978	2.0273	2.0085	1.6921	2.0247	2.0324	2.12625	1.94495	2.026
CCCCGGAGC	2.4126	2.1847	2.1991	1.9461	2.0608	1.8514	2.10912	2.17935	2.12275	2.02525
CGAGGGGGU	1.9659	1.7079	2.3094	2.2779	1.7578	1.741	1.95998	2.1219	1.73285	2.0252
GAGGUGGAG	2.5505	2.2442	2.3681	1.9547	1.7531	1.6816	2.09203	2.2526	1.99865	2.02485
GAAGAUCCG	2.2628	1.9849	1.9805	2.1299	1.952	2.0687	2.06313	2.19635	1.96845	2.0246
UUGGCACCG	2.1984	2.0938	2.0331	2.1261	2.3228	2.0142	2.1314	2.16225	2.2083	2.02365
AAGCCCGAC	1.9276	1.9015	1.9799	2.1719	2.2725	2.0666	2.05333	2.04975	2.087	2.02325
GCCCGUCCG	2.1216	2.1315	2.0971	2.1772	2.0666	1.9491	2.09052	2.1494	2.09905	2.0231
GCCCGGAAA	2.368	2.5277	2.0818	2.1719	2.3517	1.964	2.24418	2.26995	2.4397	2.0229
GUGAGAUGG	2.2312	1.796	2.2655	1.9572	1.8904	1.7801	1.98673	2.0942	1.8432	2.0228
GCUUGGCGG	2.2157	2.3716	2.1194	2.0944	2.0616	1.9245	2.1312	2.15505	2.2166	2.02195
AAACCUGAG	2.0734	2.3643	1.8412	2.293	2.5146	2.2021	2.21477	2.1832	2.43945	2.02165
UCAUCCGAG	1.9301	2.1212	1.8069	2.5507	1.86	2.2357	2.0841	2.2404	1.9906	2.0213
GCCCGUGAC	2.3609	2.2826	2.2776	2.2348	2.1165	1.7628	2.17253	2.29785	2.19955	2.0202
CGCACCCAG	2.1199	2.0467	1.7545	2.4001	2.0032	2.2852	2.1016	2.26	2.02495	2.01985
CCGGGGAAG	2.2472	2.4902	2.2734	2.4601	2.1294	1.7657	2.22767	2.35365	2.3098	2.01955
CCACCCGGU	2.2419	2.2152	2.1637	2.2591	2.3137	1.8752	2.17813	2.2505	2.26445	2.01945
GCCGGGAAG	2.2891	2.123	2.1132	1.8891	2.154	1.9253	2.08228	2.0891	2.1385	2.01925
CACCGGGGA	2.2649	1.9883	2.1601	2.0618	2.2656	1.8761	2.1028	2.16335	2.12695	2.0181
CCCGAGAAG	2.5098	2.2939	2.2717	2.6772	2.0063	1.7639	2.2538	2.5935	2.1501	2.0178
ACCCGCGGA	2.0967	2.2769	2.1124	2.1752	2.1646	1.9228	2.12477	2.13595	2.22075	2.0176
GCACCCGAC	2.1959	2.2059	2.2145	2.0791	2.0894	1.8203	2.10085	2.1375	2.14765	2.0174
GAGCCUGAG	2.0561	2.3057	2.3341	2.2441	1.9905	1.7	2.10508	2.1501	2.1481	2.01705
GCCAGAGGG	2.281	2.2973	1.9908	2.1064	2.0524	2.0429	2.12847	2.1937	2.17485	2.01685
UGAGACCCG	2.4649	2.3476	2.1402	2.2755	1.8658	1.8935	2.16458	2.3702	2.1067	2.01685
GCCGAAGAG	1.9664	2.097	1.9809	2.0927	1.8364	2.0517	2.00418	2.02955	1.9667	2.0163
AGCCCGAAA	2.3202	2.0076	2.0539	2.3722	2.4638	1.9785	2.19937	2.3462	2.2357	2.0162
CCGAGACCU	2.0945	2.2259	2.0471	2.338	1.9735	1.9844	2.11057	2.21625	2.0997	2.01575
GACCCGAGG	2.7573	2.3339	1.8081	2.2184	2.3037	2.2229	2.27405	2.48785	2.3188	2.0155
UCUGAGAAG	1.996	2.3263	2.096	2.3055	1.6274	1.9337	2.04748	2.15075	1.97685	2.01485
CCAACCCGG	2.2844	2.1234	1.8563	2.2535	2.1702	2.1731	2.14348	2.26895	2.1468	2.0147
AGCCCGGAG	2.1145	2.4677	1.8598	2.3001	2.4268	2.1691	2.223	2.2073	2.44725	2.01445
UGGCACCCC	2.2297	2.0381	2.1876	2.1189	1.9479	1.8401	2.06038	2.1743	1.993	2.01385
CGGGGUCCC	2.1599	1.9522	2.1346	2.1454	2.1593	1.8918	2.07387	2.15265	2.05575	2.0132
CUCGAGGGU	2.5084	1.9727	2.0199	1.9865	2.031	2.0064	2.08748	2.24745	2.00185	2.01315
UUCGGGGAA	2.2873	1.7188	2.0705	2.0804	1.8658	1.9543	1.99618	2.18385	1.7923	2.0124
ACGACGCCC	1.9846	1.9115	1.9344	2.1454	1.9965	2.0897	2.01035	2.065	1.954	2.01205
CUUGCGCCC	2.227	2.6427	2.1056	2.3655	2.1461	1.9182	2.23418	2.29625	2.3944	2.0119
AGGAGUGAG	2.0258	2.0892	2.3157	2.1017	1.754	1.7081	1.99908	2.06375	1.9216	2.0119
GACACUCGA	2.1763	2.0817	1.7791	2.5541	2.3273	2.2439	2.19373	2.3652	2.2045	2.0115
GACCUGAGG	2.2236	2.4545	2.0626	2.2146	1.9034	1.9602	2.13648	2.2191	2.17895	2.0114
ACACCCGGU	2.2285	1.8319	2.2784	2.0965	2.0383	1.7434	2.03617	2.1625	1.9351	2.0109
CCCCGGGGU	2.4003	2.0751	2.0149	2.5285	1.718	2.0064	2.12387	2.4644	1.89655	2.01065
AACGCCCGA	2.0861	2.0549	2.0597	2.4591	2.1042	1.9612	2.12087	2.2726	2.07955	2.01045
GCCGGGAAU	1.9181	1.9248	2.0516	2.7051	1.7847	1.9691	2.0589	2.3116	1.85475	2.01035
GGGAGUCCA	2.031	1.894	2.1366	2.1199	2.1761	1.8836	2.0402	2.07545	2.03505	2.0101
AGACACCUG	2.2426	2.0659	2.0171	2.0978	2.2234	2.0026	2.10823	2.1702	2.14465	2.00985
GAACACCCG	2.029	2.1578	2.0509	2.1724	1.9604	1.9686	2.05652	2.1007	2.0591	2.00975
CUCGGGAGG	2.1468	2.2135	2.0864	2.3293	1.9791	1.9327	2.11463	2.23805	2.0963	2.00955
CACCUGAAG	2.2759	2.1154	1.9701	2.3952	2.1583	2.0474	2.16038	2.33555	2.13685	2.00875
CCGCCCGUG	2.1993	1.8555	1.9005	2.0262	1.9852	2.1156	2.01372	2.11275	1.92035	2.00805
CCCGGGGUG	2.5275	1.8682	1.9288	2.5305	2.0063	2.0873	2.1581	2.529	1.93725	2.00805
ACCCGGUUC	2.5419	2.5219	2.0634	2.6818	2.806	1.9527	2.42795	2.61185	2.66395	2.00805
UGCCCGGGG	2.7142	2.738	2.1157	2.5924	2.4052	1.8989	2.41073	2.6533	2.5716	2.0073
CCGAGGAGG	2.0823	2.1328	2.2703	2.1156	2.0577	1.7437	2.06707	2.09895	2.09525	2.007
GAGAAGCGG	2.0899	2.2398	2.1934	2.1114	2.0768	1.8199	2.08853	2.10065	2.1583	2.00665
GACACCGGG	2.2236	2.3652	2.0895	2.4915	2.0689	1.9232	2.19365	2.35755	2.21705	2.00635
CCCCGGGUU	2.5553	2.0195	2.0751	2.4414	1.8799	1.9372	2.1514	2.49835	1.9497	2.00615
CGGACUGGG	1.9884	1.8623	2.1821	2.1454	1.5541	1.83	1.92705	2.0669	1.7082	2.00605
AGAGACCCG	2.0749	2.1706	2.0427	2.5138	2.0213	1.9688	2.13202	2.29435	2.09595	2.00575
GAGCCCGUG	2.3207	2.2288	2.2149	2.0262	1.8814	1.7962	2.07803	2.17345	2.0551	2.00555
UCUCGAGGG	2.421	2.047	1.7736	2.0233	1.8772	2.2371	2.0632	2.22215	1.9621	2.00535
AGAGGCACC	2.1579	2.0952	1.9294	2.0832	2.0078	2.0812	2.05912	2.12055	2.0515	2.0053
CGAGAGUUC	1.9148	1.6601	1.9723	2.0978	1.8529	2.0383	1.9227	2.0063	1.7565	2.0053
CACCCCGGG	2.094	2.0534	2.2363	2.2939	2.0451	1.7739	2.08277	2.19395	2.04925	2.0051
AACCUGAGA	2.1345	2.0873	1.8872	2.5344	2.3067	2.1221	2.1787	2.33445	2.197	2.00465
UCACUCGAG	2.2434	2.3979	2.1123	2.4965	2.2856	1.897	2.23878	2.36995	2.34175	2.00465
GGAACGACG	2.1558	2.0887	2.1203	2.2436	2.0373	1.8884	2.08902	2.1997	2.063	2.00435
UCGAAGAGA	2.0026	1.9082	1.8934	2.2071	2.09	2.1152	2.03608	2.10485	1.9991	2.0043
CACCUUGAG	1.9203	2.1849	1.5648	2.1965	2.1837	2.4432	2.08223	2.0584	2.1843	2.004
CUCCGAGCC	2.0841	2.0103	2.01	2.1119	1.7738	1.9975	1.99793	2.098	1.89205	2.00375
ACGCCCGAU	2.1688	2.5081	1.9798	2.5641	2.1275	2.0274	2.22928	2.36645	2.3178	2.0036
UGACGCCAG	2.347	1.8885	2.1094	1.9922	2.0157	1.8972	2.04167	2.1696	1.9521	2.0033
UGAGGGUCG	2.9971	2.446	1.9623	2.674	2.7886	2.0438	2.4853	2.83555	2.6173	2.00305
UCCGAGGAU	2.0373	2.1725	2.197	2.1295	2.0809	1.809	2.07103	2.0834	2.1267	2.003
CCUGGGAUC	2.5419	2.0175	2.1418	2.2348	1.9241	1.8631	2.12053	2.38835	1.9708	2.00245
CAGACCGGG	2.1696	2.0581	2.1582	2.0927	2.0119	1.8465	2.05617	2.13115	2.035	2.00235
CCCGGAAGA	1.9894	1.9659	2.1336	2.3964	2.1267	1.8707	2.08045	2.1929	2.0463	2.00215
GGUUGCUAG	1.9254	2.1308	2.3438	2.3674	1.8578	1.6605	2.04762	2.1464	1.9943	2.00215
GGGACACCC	2.0434	2.119	2.1466	2.1284	1.9241	1.8563	2.0363	2.0859	2.02155	2.00145
UCUCCGAGA	2.0312	2.2873	2.0447	2.5364	2.2063	1.9568	2.17712	2.2838	2.2468	2.00075
GCACCCCGG	2.1788	2.0998	2.1791	2.2093	1.821	1.8222	2.0517	2.19405	1.9604	2.00065
UUUGACGCC	2.1685	2.5747	1.849	2.2646	2.2181	2.1498	2.20412	2.21655	2.3964	1.9994
GUAGGGAGG	2.0053	2.4315	1.9661	2.4705	2.099	2.0325	2.16748	2.2379	2.26525	1.9993
CCCGGCCCC	2.3301	2.165	1.9463	2.3234	1.885	2.0508	2.11677	2.32675	2.025	1.99855
CCUGGAGGA	2.3306	2.4301	1.9768	2.3157	1.9139	2.0201	2.16453	2.32315	2.172	1.99845
CCUCCCGAG	2.4651	2.0952	1.9896	1.8811	2.2588	2.0064	2.11603	2.1731	2.177	1.998
CCCCAGGGU	2.126	2.1455	2.0045	2.1078	1.8229	1.9914	2.03302	2.1169	1.9842	1.99795
AGCCCGGGU	2.0979	2.1453	2.0516	2.1454	1.8126	1.9441	2.03282	2.12165	1.97895	1.99785
UCCCGAGAA	2.0282	2.0751	1.9445	2.8331	2.3928	2.0505	2.2207	2.43065	2.23395	1.9975
GCAGCCGAG	2.0885	1.9134	2.1296	2.3482	2.0869	1.8653	2.07198	2.21835	2.00015	1.99745
CUCACCCGG	2.2119	2.4628	2.0666	2.5305	2.4527	1.9277	2.27537	2.3712	2.45775	1.99715
GUCGGCCGG	2.4406	2.1187	2.259	2.2807	1.9415	1.7353	2.1293	2.36065	2.0301	1.99715
CCGGGACCC	2.2347	2.2685	1.9682	2.33	2.1414	2.0249	2.16128	2.28235	2.20495	1.99655
UCGAGAGAG	2.1132	1.9202	1.8878	2.7433	2.1449	2.1051	2.15242	2.42825	2.03255	1.99645
CCCGGGAUA	1.999	2.4164	2.0897	2.5459	2.0781	1.9032	2.17205	2.27245	2.24725	1.99645
CAAAGAAGG	1.9789	1.658	1.925	2.0812	2.0683	2.0676	1.96317	2.03005	1.86315	1.9963
CGCGAGGAG	2.0823	2.5555	2.1767	2.652	2.6189	1.8153	2.31678	2.36715	2.5872	1.996
CGGGGGCCG	2.3212	1.9387	1.9787	1.8681	1.7278	2.0123	1.97447	2.09465	1.83325	1.9955
CGCCCGCGA	2.3478	2.4655	1.8454	2.195	2.1083	2.1455	2.18458	2.2714	2.2869	1.99545
GAAGCUGGG	2.6041	2.3364	2.3588	1.9388	2.2519	1.6306	2.18677	2.27145	2.29415	1.9947
CCCGAAGCG	2.1711	1.8082	1.8577	2.2299	2.0807	2.1306	2.04637	2.2005	1.94445	1.99415
UCCGAGAAA	2.1794	2.0029	1.7645	2.6005	2.7469	2.2236	2.25297	2.38995	2.3749	1.99405
UCUACCCGG	2.2675	2.0509	2.0565	1.8631	2.2111	1.931	2.06335	2.0653	2.131	1.99375
GGGAGGUUU	2.6122	2.4271	1.9356	2.0325	2.9706	2.0517	2.33828	2.32235	2.69885	1.99365
CGCCCCCGG	2.2319	2.3476	1.9989	2.0404	2.0811	1.9884	2.11472	2.13615	2.21435	1.99365
CGCGACGCC	2.0906	1.9277	1.9661	2.1572	1.6823	2.0205	1.97407	2.1239	1.805	1.9933
AGACCCGAG	2.1231	2.7484	1.8537	2.8892	2.822	2.1326	2.42817	2.50615	2.7852	1.99315
GCUCGAGAC	1.9894	2.1364	2.0265	2.245	1.6887	1.9593	2.00755	2.1172	1.91255	1.9929
CCCCCGGAA	2.2601	2.1066	2.037	1.9461	1.7314	1.9485	2.00495	2.1031	1.919	1.99275
GAACCCGGC	2.1845	1.9874	1.9424	1.9742	2.2403	2.0428	2.06193	2.07935	2.11385	1.9926
UGGAUCGGC	1.9503	1.6421	2.0277	2.1629	2.0336	1.9575	1.96235	2.0566	1.83785	1.9926
CGAGAAUCC	2.5702	2.1212	2.1015	2.268	2.199	1.8836	2.19058	2.4191	2.1601	1.99255
GCGACCCGG	2.0377	1.9256	2.0556	2.3891	2.2131	1.9277	2.09147	2.2134	2.06935	1.99165
ACCCGAAAG	1.9575	2.1934	1.822	2.4113	2.3517	2.1608	2.14945	2.1844	2.27255	1.9914
CCCGAGGGA	2.2058	2.6159	1.9604	2.2365	2.6355	2.0221	2.27937	2.22115	2.6257	1.99125
CCCGGCGUU	2.1434	2.2913	1.9222	2.2348	2.0243	2.0602	2.1127	2.1891	2.1578	1.9912
GACACUGGG	2.5087	2.3133	1.8772	2.0165	1.9977	2.1051	2.13642	2.2626	2.1555	1.99115
GGUCCGUUG	2.6239	2.7966	2.0221	2.0762	2.2758	1.9602	2.29247	2.35005	2.5362	1.99115
GAGGCACCU	2.1907	1.9204	1.9693	1.9985	2.1789	2.0104	2.0447	2.0946	2.04965	1.98985
CUGGAGGGG	2.1792	1.9041	1.8334	1.9378	2.0689	2.1451	2.01142	2.0585	1.9865	1.98925
CCGAUGGGA	2.1569	2.4545	2.1473	2.3531	2.2345	1.8308	2.19618	2.255	2.3445	1.98905
GAAAGCCCG	2.1565	2.5045	1.979	2.585	1.9888	1.9985	2.20205	2.37075	2.24665	1.98875
GGCACCCUG	2.3464	2.6427	1.8806	2.5855	2.2201	2.0946	2.29498	2.46595	2.4314	1.9876
CAGGCCCGG	2.3265	2.0405	2.1836	2.056	2.0364	1.7915	2.07242	2.19125	2.03845	1.98755
GACCCAGAG	2.1164	2.0247	2.0582	2.2125	2.0845	1.9169	2.06887	2.16445	2.0546	1.98755
ACCCGGUGG	2.181	2.2528	2.1512	1.9461	1.8716	1.8232	2.03765	2.06355	2.0622	1.9872
GUCCGAGAG	2.0815	2.3328	1.8835	2.3558	2.0122	2.0907	2.12608	2.21865	2.1725	1.9871
ACCCGAUGA	2.1633	2.4725	1.8884	2.3128	2.5246	2.0857	2.24122	2.23805	2.49855	1.98705
CGUCCGAGG	2.2801	2.2348	2.1217	2.2555	2.1955	1.8521	2.15662	2.2678	2.21515	1.9869
GAGGGGGGC	2.2467	1.9129	2.105	2.3308	1.5203	1.8684	1.99735	2.28875	1.7166	1.9867
CGAAAUUCG	2.0183	2.1187	1.9281	2.1003	1.7681	2.0452	1.99645	2.0593	1.9434	1.98665
CUGGGUUUC	2.0307	2.2683	1.9281	2.2807	1.1441	2.0452	1.94952	2.1557	1.7062	1.98665
GGCCGAAGA	2.2101	2.2059	2.0938	2.0348	2.2217	1.8794	2.10762	2.12245	2.2138	1.9866
CAGGGAGAG	1.9914	1.8446	1.9884	2.1568	1.7918	1.9837	1.95945	2.0741	1.8182	1.98605
GGGAAUGGC	1.999	2.1443	1.9942	2.3242	2.0203	1.9778	2.07663	2.1616	2.0823	1.986
CACGCGAGA	2.1635	2.4381	2.0078	2.1667	2.4639	1.9639	2.20065	2.1651	2.451	1.98585
GACCCCCGG	2.4516	2.4781	2.1368	2.0646	2.3536	1.8345	2.21987	2.2581	2.41585	1.98565
CACCGAGGA	2.1271	2.2047	1.7976	2.1522	2.1013	2.173	2.09265	2.13965	2.153	1.9853
UUGGCGGCC	1.993	2.1654	2.1004	2.1143	1.7289	1.8694	1.99523	2.05365	1.94715	1.9849
CAAGCCCGG	1.9541	2.1413	2.1248	2.1765	2.4093	1.8444	2.1084	2.0653	2.2753	1.9846
GAGGUCAGA	2.2483	2.0006	1.9931	2.0904	2.0129	1.9756	2.05348	2.16935	2.00675	1.98435
CCUGAGAUG	2.022	1.9675	1.8069	2.3123	2.1165	2.1593	2.06408	2.16715	2.042	1.9831
CAGGCGAGA	1.9997	1.8446	2.0245	2.1808	1.7527	1.9412	1.95725	2.09025	1.79865	1.98285
CGCCCGAUU	1.9627	2.2929	1.9895	2.3242	1.9241	1.9746	2.078	2.14345	2.1085	1.98205
CGGUACCCG	2.1378	2.043	2.0336	2.1726	1.6562	1.9302	1.99557	2.1552	1.8496	1.9819
CGACGCCCA	1.9881	2.0517	1.9946	2.2387	1.952	1.9691	2.03237	2.1134	2.00185	1.98185
GAAAGGAGA	2.051	2.1847	1.9431	2.0868	1.7769	2.0205	2.0105	2.0689	1.9808	1.9818
GAGGAUUUC	2.2915	2.2434	2.259	2.5127	1.8374	1.7043	2.14138	2.4021	2.0404	1.98165
GAGAUCCGG	1.9926	1.5852	2.01	2.1454	1.884	1.9527	1.92832	2.069	1.7346	1.98135
CCUCCGAGA	2.4706	2.2737	1.953	2.2516	2.1591	2.0093	2.18622	2.3611	2.2164	1.98115
GCGUCCGAG	2.3071	2.221	1.8081	1.9849	2.1466	2.1527	2.1034	2.146	2.1838	1.9804
GGGAAAGCG	2.121	2.1425	2.126	2.1124	2.2695	1.8345	2.10098	2.1167	2.206	1.98025
AACACCCGC	2.1465	2.3174	1.9056	2.4261	2.0459	2.0536	2.14918	2.2863	2.18165	1.9796
CGAGGAGGC	2.2058	2.8775	1.8722	2.5745	2.3346	2.0867	2.32522	2.39015	2.60605	1.97945
CCCGGAGAU	2.429	2.3277	2.0298	2.3611	2.1583	1.9291	2.20583	2.39505	2.243	1.97945
UGAACCCGA	2.0245	2.2517	1.9231	2.4611	2.1841	2.0348	2.14655	2.2428	2.2179	1.97895
CGAGAUGAC	1.9585	1.7411	1.911	2.1655	1.8942	2.0466	1.95282	2.062	1.81765	1.9788
UGAGAUGGC	2.3713	2.3241	1.9391	1.9166	1.8472	2.0179	2.06937	2.14395	2.08565	1.9785
GGAUCGGCG	2.3348	2.0528	2.2917	2.0301	1.8207	1.6643	2.0324	2.18245	1.93675	1.978
CGGAGUGUG	2.0498	1.9416	2.0548	2.296	1.3503	1.9008	1.93222	2.1729	1.64595	1.9778
GCGAGGAGG	2.0512	2.227	2.1099	2.721	1.8772	1.8456	2.13865	2.3861	2.0521	1.97775
GGGUCCGAG	2.292	2.4902	2.006	2.5745	1.9562	1.9491	2.21133	2.43325	2.2232	1.97755
GGACCGAGG	2.5517	2.2167	2.1848	2.3838	1.6203	1.7701	2.12123	2.46775	1.9185	1.97745
GACUCGAGA	2.1896	2.0833	1.8093	2.3389	2.0826	2.1447	2.10807	2.26425	2.08295	1.977
AUCCCGGGA	2.4194	2.6583	2.0649	2.6643	2.3391	1.8884	2.33907	2.54185	2.4987	1.97665
CCCAAGAGA	1.9531	1.9079	1.9633	2.1454	2.1065	1.9896	2.01097	2.04925	2.0072	1.97645
GCCUCCGAG	2.3596	2.282	1.8645	2.1454	2.0557	2.0873	2.13242	2.2525	2.16885	1.9759
GCCCGAACG	2.3075	2.3135	2.047	2.2424	2.1415	1.9044	2.15938	2.27495	2.2275	1.9757
GAGCACCCG	2.2595	2.6003	2.0083	2.4037	2.4052	1.9427	2.26995	2.3316	2.50275	1.9755
CCGGCUGGU	2.0274	2.0796	1.9496	2.2436	1.484	2.0008	1.96417	2.1355	1.7818	1.9752
CCCCGGGUG	2.3126	2.3503	2.0086	1.8686	1.9034	1.9417	2.0642	2.0906	2.12685	1.97515
UGGGGACCC	2.4391	2.3234	2.3628	2.0354	2.6395	1.5875	2.23128	2.23725	2.48145	1.97515
CCUGAGACG	2.068	2.275	1.835	2.0819	1.9384	2.1147	2.05217	2.07495	2.1067	1.97485
GACAACCCG	2.2176	2.1949	2.0474	2.0623	2.0385	1.902	2.07712	2.13995	2.1167	1.9747
GCCGAGAUU	2.0561	1.8287	2.1501	2.4167	1.5703	1.7989	1.97013	2.2364	1.6995	1.9745
AGGCGUCCG	2.1933	2.3644	2.2187	2.0024	1.5393	1.7302	2.00805	2.09785	1.95185	1.97445
AGCCGCCCG	2.3081	2.5078	2.1318	2.2981	2.3637	1.8164	2.23765	2.3031	2.43575	1.9741
CCUCGCCCG	2.0926	2.2481	1.9611	2.1837	2.0501	1.986	2.08693	2.13815	2.1491	1.97355
GCCCGGAGG	2.5693	2.3476	2.1123	2.0544	1.8658	1.8345	2.13065	2.31185	2.1067	1.9734
GGAAUCUGG	2.8558	2.8547	2.3084	2.3157	2.0768	1.6379	2.34155	2.58575	2.46575	1.97315
UUGCGCCCG	2.6455	2.368	2.0556	2.59	2.2188	1.8902	2.29468	2.61775	2.2934	1.9729
AGUGGCACC	2.4364	2.2103	1.9887	2.1701	1.9684	1.957	2.12182	2.30325	2.08935	1.97285
ACCGGAGGU	2.5442	2.6159	2.0667	2.0804	2.2856	1.8761	2.24482	2.3123	2.45075	1.9714
CGGGUCGCC	2.1805	2.1457	2.0469	1.9265	2.2252	1.8953	2.07002	2.0535	2.18545	1.9711
GAGCCCGCG	2.1222	1.9896	2.2028	2.1695	2.0034	1.7391	2.03777	2.14585	1.9965	1.97095
GCCGAAGGC	2.1599	2.0393	1.9286	2.209	1.8244	2.0128	2.029	2.18445	1.93185	1.9707
CCACCCGUG	2.2554	2.2923	2.126	2.1663	2.1919	1.8144	2.14105	2.21085	2.2421	1.9702
GAGGAGAGA	1.974	2.0262	1.8554	2.3838	2.0213	2.0846	2.05755	2.1789	2.02375	1.97
CACCUGGAG	2.3401	2.2814	2.1445	2.2395	2.1098	1.7952	2.15175	2.2898	2.1956	1.96985
UGAGCGAGG	2.159	1.6531	2.035	2.1589	1.7668	1.9037	1.94608	2.15895	1.70995	1.96935
CGAGAAGGA	2.1016	2.1482	1.9661	2.4594	2.4091	1.9715	2.17598	2.2805	2.27865	1.9688
GAUGGCAGG	2.5536	2.2847	1.7476	1.9829	2.2157	2.1888	2.16222	2.26825	2.2502	1.9682
GGGUCGGCG	2.2778	2.4861	2.2894	2.4253	2.1193	1.645	2.20715	2.35155	2.3027	1.9672
GACCGAGAA	2.0561	2.0751	1.9273	2.3674	2.1895	2.0064	2.10363	2.21175	2.1323	1.96685
CUGGCUCGC	2.2801	2.2277	1.9031	2.1344	1.9537	2.0285	2.08792	2.20725	2.0907	1.9658
CGCCCAGAG	2.2099	2.0435	2.0977	2.2436	2.2637	1.8322	2.1151	2.22675	2.1536	1.96495
UGAUCCCGG	2.068	2.6374	2.0991	2.4089	1.8904	1.8304	2.1557	2.23845	2.2639	1.96475
GACACCGGA	2.0748	2.2646	1.9077	2.2658	1.8416	2.0206	2.06252	2.1703	2.0531	1.96415
AGGGCGCGG	2.3142	1.9763	1.99	1.9752	2.0768	1.9382	2.04512	2.1447	2.02655	1.9641
UCCCGGCCG	2.1429	2.3057	2.0332	2.0832	1.8823	1.8943	2.05693	2.11305	2.094	1.96375
CCGGGGAAA	2.1425	2.0814	2.0496	2.474	1.9935	1.8747	2.10262	2.30825	2.03745	1.96215
GAAUCCGAG	1.9718	1.9411	1.7244	2.3783	1.8495	2.1997	2.0108	2.17505	1.8953	1.96205
GCACCUGAA	2.0364	2.0769	1.771	2.3147	2.2815	2.153	2.10558	2.17555	2.1792	1.962
GCCCCCCCC	2.3234	2.3157	1.9933	1.9499	2.2379	1.9301	2.12505	2.13665	2.2768	1.9617
CCCGAGCCG	2.2475	2.1808	1.8545	2.205	2.1379	2.0662	2.11532	2.22625	2.15935	1.96035
AGAACCCGG	2.1075	1.9428	1.9845	2.122	1.8821	1.936	1.99582	2.11475	1.91245	1.96025
GACGCCCCG	2.2018	2.0595	1.8826	2.4579	2.0051	2.037	2.10732	2.32985	2.0323	1.9598
GACGAUUGG	2.3562	2.1799	1.7932	2.1844	1.7958	2.1263	2.07263	2.2703	1.98785	1.95975
CACUCGGGA	2.3105	1.8616	1.9657	2.4103	2.3042	1.9534	2.13428	2.3604	2.0829	1.95955
GGAUGCCCG	2.2293	2.1585	1.9917	2.0389	2.0469	1.9272	2.06542	2.1341	2.1027	1.95945
GGUCCGCGG	2.5677	2.1212	2.0268	2.0739	1.9241	1.8918	2.10092	2.3208	2.02265	1.9593
UACCCGGAA	1.9892	2.0378	1.9527	2.4928	2.1013	1.9655	2.08988	2.241	2.06955	1.9591
CACCGGGGG	2.1049	1.9763	2.1567	2.1454	1.718	1.7608	1.97702	2.12515	1.84715	1.95875
CCGACCCGA	2.1498	2.1904	1.9591	2.1276	2.1967	1.9563	2.09665	2.1387	2.19355	1.9577
CGCCCCGGG	2.0608	2.0271	1.8725	2.0858	1.7771	2.0423	1.9776	2.0733	1.9021	1.9574
AAGACCCGA	2.1348	1.9284	1.7533	2.2451	2.2312	2.161	2.07563	2.18995	2.0798	1.95715
CCCGGGCCG	2.2368	2.1551	1.9701	2.2768	2.055	1.9421	2.10598	2.2568	2.10505	1.9561
GAUACCUGG	2.181	2.3586	2.069	2.2275	2.166	1.842	2.14068	2.20425	2.2623	1.9555
CCGGGGACC	2.1166	2.2894	2.0222	2.1034	2.2939	1.8884	2.11898	2.11	2.29165	1.9553
GAUGCCCGU	2.3026	2.2763	2.0806	1.8868	2.4017	1.8296	2.1296	2.0947	2.339	1.9551
UGACCCCCG	2.2298	2.6163	2.1663	1.9265	1.9634	1.7432	2.10758	2.07815	2.28985	1.95475
AGACACCGG	2.1461	2.2154	1.9111	2.1528	2.0365	1.9976	2.07658	2.14945	2.12595	1.95435
UGCCGGUGA	2.068	2.6099	2.1274	2.1911	2.3472	1.7808	2.1874	2.12955	2.47855	1.9541
UGAGCCCGA	2.0866	2.1935	2.0951	2.1261	1.8374	1.8128	2.02525	2.10635	2.01545	1.95395
GCCCGACGA	2.074	2.3381	1.9464	2.4967	2.2392	1.9612	2.17593	2.28535	2.28865	1.9538
CCGCGCCCG	2.1714	2.1597	1.8912	2.1216	1.8065	2.016	2.02773	2.1465	1.9831	1.9536
GGAGAGCCG	2.045	1.7831	1.9005	2.2646	1.8172	2.0064	1.96947	2.1548	1.80015	1.95345
CCGGCCCGG	2.3614	1.9815	1.9199	1.9401	1.9559	1.9866	2.02423	2.15075	1.9687	1.95325
CCGAGAGGG	2.1356	2.369	1.9275	2.8325	2.2637	1.9783	2.2511	2.48405	2.31635	1.9529
CAGCCCGAA	2.204	2.1176	1.8916	2.2489	2.4052	2.014	2.14688	2.22645	2.2614	1.9528
CUUGACGCG	2.2102	2.5472	2.0829	2.1568	1.9547	1.8199	2.12862	2.1835	2.25095	1.9514
CCAAGAGAG	1.9972	1.8951	1.9545	2.1454	2.2668	1.9475	2.03442	2.0713	2.08095	1.951
UGUGCCCGG	2.1688	2.227	2.0277	2.128	2.3465	1.8736	2.1286	2.1484	2.28675	1.95065
AACUCGAGA	2.0801	1.9983	1.769	2.4465	2.2842	2.1322	2.11838	2.2633	2.14125	1.9506
CUGACCCCG	2.1153	2.2695	1.9	2.3137	1.9744	2.0008	2.09562	2.2145	2.12195	1.9504
CCCGCGAGG	2.2567	2.1739	2.0696	2.1114	2.199	1.829	2.1066	2.18405	2.18645	1.9493
GACGCCGGG	2.7573	2.6516	2.1069	2.1752	2.325	1.7915	2.30125	2.46625	2.4883	1.9492
CCGGGGCGG	2.2212	2.0905	1.9874	2.066	2.4515	1.9109	2.12125	2.1436	2.271	1.94915
UGUUCUGGG	3.102	2.8591	2.006	2.5745	2.1165	1.8918	2.42498	2.83825	2.4878	1.9489
CGUGCCCGA	2.1815	2.3871	2.1436	2.2043	2.0977	1.7535	2.12795	2.1929	2.2424	1.94855
CGCUCUGGG	1.9761	1.9265	1.9598	2.1295	1.9669	1.9364	1.98253	2.0528	1.9467	1.9481
UGACCUGAG	2.0312	1.9429	1.9848	2.174	1.984	1.9109	2.00463	2.1026	1.96345	1.94785
CGCCCCGGA	2.1736	1.971	2.111	2.0878	2.0172	1.7845	2.02418	2.1307	1.9941	1.94775
CCCGCGAAG	2.3779	2.1915	1.8863	2.0601	2.3301	2.0091	2.1425	2.219	2.2608	1.9477
UUGACCCCC	2.3801	1.9142	2.2078	1.97	2.033	1.6874	2.03208	2.17505	1.9736	1.9476
CCCCCCCGG	2.2632	1.9547	1.9971	1.9429	1.6971	1.8974	1.95873	2.10305	1.8259	1.94725
CUGGCACCG	2.0874	2.533	1.8751	2.3368	2.0054	2.0185	2.1427	2.2121	2.2692	1.9468
CCAGAGAGA	1.9221	1.7907	1.9353	2.182	2.0412	1.9583	1.9716	2.05205	1.91595	1.9468
CCGAGGUAC	2.0331	1.9613	1.9341	2.0821	2.0784	1.9593	2.00805	2.0576	2.01985	1.9467
GAAGAGACC	2.0368	1.8505	1.8809	2.0855	1.9614	2.012	1.97118	2.06115	1.90595	1.94645
CCGGCUCUG	1.9469	2.1437	2.1103	2.1068	1.4561	1.7818	1.92427	2.02685	1.7999	1.94605
CCGGGGGGC	2.3656	1.9494	1.9376	2.3405	1.9241	1.9543	2.07858	2.35305	1.93675	1.94595
CCCCGGCGA	2.4223	2.0459	2.1072	1.9037	2.1861	1.7844	2.07493	2.163	2.116	1.9458
GAGCCCGAA	2.0843	2.0552	1.9771	2.1398	2.0403	1.9139	2.0351	2.11205	2.04775	1.9455
CGGUUGCCG	2.3827	2.5062	1.8715	2.4253	1.8684	2.0189	2.17883	2.404	2.1873	1.9452
CACCCGGCA	2.2206	2.1871	2.0477	2.3191	2.089	1.8426	2.11768	2.26985	2.13805	1.94515
CCCGGAAAA	2.2007	2.1158	1.9085	2.0957	2.1333	1.9804	2.0724	2.1482	2.12455	1.94445
CGCCUCGGG	2.4068	1.8289	1.8275	2.2303	1.8263	2.0599	2.02995	2.31855	1.8276	1.9437
GGUCUGAGG	2.8262	1.8138	2.396	2.5745	1.7103	1.4905	2.13522	2.70035	1.76205	1.94325
GACCCGAAC	2.0541	1.9882	1.9618	2.3143	1.9402	1.9243	2.03048	2.1842	1.9642	1.94305
CUGGGGCCC	2.2326	2.3539	1.8837	2.1134	1.8571	2.0022	2.07382	2.173	2.1055	1.94295
UCACCCGUG	2.068	2.1666	1.7565	2.4292	1.8121	2.1293	2.06028	2.2486	1.98935	1.9429
CCCGACGGG	2.3368	1.8261	2.1313	2.0739	1.7445	1.7542	1.9778	2.20535	1.7853	1.94275
GAGGAGGCC	2.2371	2.21	1.8293	1.943	1.5974	2.0551	1.97865	2.09005	1.9037	1.9422
GGAGGGAUC	2.2729	1.9443	1.8072	2.0488	1.9761	2.0762	2.02092	2.16085	1.9602	1.9417
GGAAGGGUC	2.3154	2.3412	2.2074	1.8704	1.7761	1.6757	2.03103	2.0929	2.05865	1.94155
CCCGGGCGU	1.9172	1.9454	2.0538	2.0784	1.7638	1.8273	1.93098	1.9978	1.8546	1.94055
CGAGAAUGG	2.2344	1.781	2.0031	2.0961	2.2338	1.8779	2.03772	2.16525	2.0074	1.9405
CUCCGAGAA	2.4208	2.2618	1.8607	2.5711	2.7793	2.0201	2.31897	2.49595	2.52055	1.9404
CGCGAGAAA	1.9206	1.753	1.9725	2.0963	2.2228	1.908	1.97887	2.00845	1.9879	1.94025
GACUCAGAG	2.068	1.8446	1.9767	2.1724	1.6458	1.9037	1.9352	2.1202	1.7452	1.9402
GGGAUUCUG	2.2403	2.4704	2.1194	1.9411	1.9241	1.7608	2.07602	2.0907	2.19725	1.9401
UCGCGGAAG	2.5232	2.0534	2.0186	1.97	2.0572	1.8604	2.08047	2.2466	2.0553	1.9395
GGCACCGCG	2.1127	2.3596	1.853	2.1176	1.7325	2.0251	2.03342	2.11515	2.04605	1.93905
CGCCCGAAC	2.077	2.1055	1.8182	2.1078	2.2279	2.0592	2.06593	2.0924	2.1667	1.9387
GAGGGUUGC	2.2748	2.275	2.1174	2.1931	2.1807	1.758	2.13317	2.23395	2.22785	1.9377
GGAAGAAAG	1.9426	1.8935	1.8427	2.2213	1.9824	2.0325	1.98583	2.08195	1.93795	1.9376
CCCGGAGAC	1.9606	2.2755	1.92	2.1689	1.861	1.9547	2.02345	2.06475	2.06825	1.93735
GACCCGGUU	2.3525	2.1373	2.1094	2.1341	2.3619	1.7653	2.14342	2.2433	2.2496	1.93735
CGCACCCGG	2.4222	2.754	2.0431	2.4037	2.423	1.8313	2.31288	2.41295	2.5885	1.9372
GAACCCGGA	1.9342	1.8927	1.9577	2.1241	2.0007	1.9166	1.971	2.02915	1.9467	1.93715
GAUCCGGGA	2.4254	1.9641	1.6871	2.3308	1.9479	2.1869	2.09037	2.3781	1.956	1.937
CAGACGCCC	2.2403	2.5363	1.8731	2.4136	2.2792	1.9962	2.22312	2.32695	2.40775	1.93465
CCCCGCGAG	2.3755	2.0574	1.9995	2.1784	1.9439	1.8697	2.07073	2.27695	2.00065	1.9346
CGAGACUCG	2.0383	2.152	1.9329	2.3992	1.8758	1.9355	2.05562	2.21875	2.0139	1.9342
AGCUGGGGG	2.4245	1.5901	1.931	1.8742	2.3001	1.9372	2.00952	2.14935	1.9451	1.9341
CCCUGGGAA	2.2025	2.0133	2.1201	1.8838	1.8146	1.7478	1.96368	2.04315	1.91395	1.93395
CGACGUCCG	2.0514	1.8779	2.0304	2.1541	2.1637	1.8372	2.01912	2.10275	2.0208	1.9338
UGGCCUUGG	2.2459	2.8858	1.8334	2.0301	1.9448	2.0342	2.16237	2.138	2.4153	1.9338
CACUCGGGU	1.9244	2.5171	1.8842	2.6222	1.7638	1.9826	2.11572	2.2733	2.14045	1.9334
CAGCCGAGA	2.3677	2.2155	1.9714	2.2698	2.1193	1.8943	2.13967	2.31875	2.1674	1.93285
CCCAAAGAA	1.9503	1.6246	1.8237	2.0815	2.0962	2.0414	1.93628	2.0159	1.8604	1.93255
CCGAACCCG	2.179	2.0085	1.8713	2.0978	1.9811	1.9937	2.0219	2.1384	1.9948	1.9325
ACAGCCGAG	1.9301	2.1358	1.9217	2.0927	2.0389	1.9431	2.01038	2.0114	2.08735	1.9324
GGCCGCGAG	2.2295	1.9743	1.8936	2.056	1.6435	1.9706	1.96125	2.14275	1.8089	1.9321
CUGGCUCCG	1.9949	1.7747	2.1789	2.1888	1.7686	1.6851	1.93183	2.09185	1.77165	1.932
GAAAGAUGG	2.0902	1.9933	1.9268	2.1839	2.1241	1.9355	2.0423	2.13705	2.0587	1.93115
AAACCCGAA	1.9466	1.7962	1.7189	2.1963	2.1571	2.1428	1.99298	2.07145	1.97665	1.93085
CCGAGCCAG	2.007	1.918	1.9238	2.1138	1.9184	1.9379	1.96982	2.0604	1.9182	1.93085
UGCCCGGGC	2.9031	2.6072	2.0092	3.0806	2.1708	1.8521	2.43717	2.99185	2.389	1.93065
CCCGGCGAA	2.3437	2.1904	1.9502	2.0501	1.9669	1.9109	2.0687	2.1969	2.07865	1.93055
CUCGAGAAC	2.4525	2.3397	1.8212	2.4691	2.4035	2.0396	2.25427	2.4608	2.3716	1.9304
GACCUCGAG	2.0993	2.2079	1.915	2.7089	2.2157	1.9456	2.18207	2.4041	2.2118	1.9303
GUCCUUGAC	2.0117	2.2398	1.7769	2.2476	1.754	2.0825	2.01875	2.12965	1.9969	1.9297
GAUGCCCCG	2.0915	2.1066	1.7746	2.2267	1.8075	2.0846	2.01525	2.1591	1.95705	1.9296
GCACCGGAG	2.4466	2.2992	2.0012	2.1958	2.1319	1.8571	2.1553	2.3212	2.21555	1.92915
CGGUCGCGG	2.2697	2.047	1.5085	2.3373	2.1275	2.349	2.1065	2.3035	2.08725	1.92875
CCCCCUGAG	2.3127	2.2322	2.029	1.9796	1.8869	1.8278	2.0447	2.14615	2.05955	1.9284
GUUGAGGGA	2.2786	1.9727	2.136	1.9865	1.8529	1.7198	1.99108	2.13255	1.9128	1.9279
UCUCGCCCG	2.0071	2.048	1.9496	2.0823	2.0373	1.9053	2.00493	2.0447	2.04265	1.92745
GACACCUCG	2.3518	2.3871	1.8585	2.1707	2.3391	1.9963	2.18392	2.26125	2.3631	1.9274
CGACCCCCG	2.3587	2.0168	2.0241	2.1196	2.0555	1.8303	2.0675	2.23915	2.03615	1.9272
CCGGGAGCC	2.0214	2.5425	2.0875	2.0875	2.2361	1.7663	2.12355	2.05445	2.3893	1.9269
UCCGAGACU	2.0755	1.9256	1.926	2.1847	1.8325	1.9277	1.97867	2.1301	1.87905	1.92685
GACCCUGGG	2.0799	2.1467	1.9758	2.1948	2.0347	1.8779	2.05163	2.13735	2.0907	1.92685
GGGAGAAGG	2.1321	2.059	1.9857	2.1953	2.3268	1.8665	2.09423	2.1637	2.1929	1.9261
UACCCGAAG	2.0819	2.0402	1.9178	2.5427	2.3711	1.9341	2.14797	2.3123	2.20565	1.92595
GGCCCUGGA	2.0317	2.2693	1.9809	2.1078	1.7216	1.8707	1.997	2.06975	1.99545	1.9258
AGAGGCCCG	2.0045	1.6625	1.9809	2.1643	2.0423	1.8707	1.9542	2.0844	1.8524	1.9258
GCCCGGGCA	2.0486	1.9355	1.9621	2.3167	1.9874	1.8894	2.02328	2.18265	1.96145	1.92575
UCGGGGAGG	2.1254	2.2288	2.0831	2.503	1.4965	1.7676	2.03407	2.3142	1.86265	1.92535
GAUCGGAGG	2.3034	1.8671	1.7532	1.9536	1.6895	2.0973	1.94402	2.1285	1.7783	1.92525
CAGAGCCGG	2.2246	1.9703	1.9091	1.9016	2.0407	1.9413	1.99793	2.0631	2.0055	1.9252
UGGGGGUGA	1.9954	2.3785	2.0991	2.2584	2.1604	1.75	2.10697	2.1269	2.26945	1.92455
GACCCAGGG	2.2603	2.2521	1.8077	2.2951	2.1777	2.0398	2.13878	2.2777	2.2149	1.92375
GCGCCCCGG	2.1946	1.9387	1.9872	1.8681	1.9896	1.8602	1.97307	2.03135	1.96415	1.9237
CGCCGGAGA	2.1541	2.152	1.9505	2.1256	1.7816	1.895	2.0098	2.13985	1.9668	1.92275
GCAGCCCGG	2.1773	1.7546	1.9978	2.0408	2.1118	1.8456	1.98798	2.10905	1.9332	1.9217
GAAAGACCC	2.0574	2.1094	1.884	2.2151	1.9011	1.9579	2.02082	2.13625	2.00525	1.92095
ACACCCGAA	2.0868	2.7249	1.8282	2.4445	2.7288	2.0116	2.30413	2.26565	2.72685	1.9199
GGCACCGGC	2.4083	2.4283	1.8515	2.1545	2.1596	1.9883	2.16508	2.2814	2.29395	1.9199
UGCCCGUGA	2.208	1.9166	2.2985	2.056	1.9041	1.5407	1.98732	2.132	1.91035	1.9196
GAGGGUUCC	2.1956	2.1861	2.0121	2.6487	1.9954	1.826	2.14398	2.42215	2.09075	1.91905
CAGGGGUGG	2.502	2.2886	2.0121	2.013	2.0429	1.826	2.1141	2.2575	2.16575	1.91905
GACCCGAGU	1.9148	1.947	1.8204	2.3838	2.6605	2.0171	2.12393	2.1493	2.30375	1.91875
GCUGAUGCC	2.0194	2.0654	1.8988	2.0951	2.0596	1.9378	2.01268	2.05725	2.0625	1.9183
CGCCCGUGA	2.4022	2.3197	2.2035	2.1454	2.1962	1.6329	2.14998	2.2738	2.25795	1.9182
CCGCUCGAG	2.217	2.3057	1.9766	2.1648	2.4268	1.8592	2.15835	2.1909	2.36625	1.9179
GCGGGAGAA	2.325	2.2041	1.9691	2.0606	2.3263	1.8655	2.1251	2.1928	2.2652	1.9173
ACCACCCGA	2.0554	1.9005	1.7635	2.1238	2.3245	2.0707	2.03973	2.0896	2.1125	1.9171
CGGGGUACC	2.0446	2.079	2.1232	2.1818	1.9785	1.7101	2.01953	2.1132	2.02875	1.91665
CUCCGCCCG	2.2012	1.8213	2.0509	2.1154	2.1235	1.7824	2.01578	2.1583	1.9724	1.91665
CGGACCCGG	2.1266	2.1291	1.9422	2.1607	1.9378	1.8906	2.03117	2.14365	2.03345	1.9164
GAGACCUGA	2.0933	2.0053	1.9068	2.2438	1.9065	1.9249	2.01343	2.16855	1.9559	1.91585
CCGAUCCGG	2.3294	2.1414	2.0655	2.1537	2.02	1.7659	2.07932	2.24155	2.0807	1.9157
UCGAGCCCG	2.3254	2.0446	1.8831	2.0851	1.9318	1.9477	2.03628	2.20525	1.9882	1.9154
GGGAGAGAA	2.1914	2.2025	1.8962	2.2842	2.2017	1.9337	2.11828	2.2378	2.2021	1.91495
CCCGAUCCG	2.1866	1.8597	1.884	1.9696	2.1134	1.9454	1.99312	2.0781	1.98655	1.9147
CGUGGAGGC	2.0967	2.0367	1.9661	2.2646	1.7371	1.8631	1.99405	2.18065	1.8869	1.9146
CCCGGGGCG	2.3126	1.9338	1.739	2.0762	2.0896	2.0897	2.04015	2.1944	2.0117	1.91435
UGCACCCAG	2.261	2.112	1.9474	2.3171	2.3603	1.8803	2.14635	2.28905	2.23615	1.91385
GGGAACCUC	2.2212	2.1975	1.8883	2.013	1.9795	1.9392	2.03978	2.1171	2.0885	1.91375
GGCUCAGGU	2.1033	2.0574	1.8869	2.3105	2.1379	1.9403	2.07272	2.2069	2.09765	1.9136
GGGUGGUGG	2.2058	1.6601	1.8388	1.9071	1.7958	1.9873	1.89915	2.05645	1.72795	1.91305
CUCCCGGGG	2.4264	1.9552	1.9224	2.0882	1.9241	1.9032	2.03658	2.2573	1.93965	1.9128
CAGACCCGG	2.3659	2.251	1.9975	2.0606	1.9567	1.8267	2.0764	2.21325	2.10385	1.9121
CCCGAAGGG	2.2361	2.3619	1.8245	2.0757	2.1431	1.9994	2.10678	2.1559	2.2525	1.91195
GAGACCCGC	2.0498	2.0711	1.8527	2.2458	1.8679	1.9712	2.00975	2.1478	1.9695	1.91195
ACACACCCG	2.0774	2.0014	1.8419	2.1114	2.3212	1.9811	2.05573	2.0944	2.1613	1.9115
CUCGAGAGG	2.1524	2.1457	1.8572	2.5979	2.0157	1.9655	2.1224	2.37515	2.0807	1.91135
ACCCGAACC	2.115	2.0416	1.7873	2.2495	2.204	2.0325	2.07165	2.18225	2.1228	1.9099
GAAAGCCGG	2.1153	2.0525	2.0101	2.2436	1.9241	1.8097	2.02588	2.17945	1.9883	1.9099
CGGAAGGGA	2.2714	2.0411	1.8635	1.993	1.8716	1.9547	1.99922	2.1322	1.95635	1.9091
CCCUGAGAG	2.2536	2.0574	2.111	2.1638	2.2859	1.7051	2.09613	2.2087	2.17165	1.90805
GCAGCCCGA	2.2152	1.9251	1.8664	2.1663	1.9553	1.948	2.01272	2.19075	1.9402	1.9072
GAGGUCCAG	1.9491	1.8764	1.9758	2.1701	1.8578	1.8384	1.9446	2.0596	1.8671	1.9071
GACGCCCUG	2.2096	2.2615	1.8663	2.2728	2.2141	1.9475	2.12863	2.2412	2.2378	1.9069
CCGGCGGGA	2.2589	2.3837	1.8902	2.0024	1.8748	1.9227	2.05545	2.13065	2.12925	1.90645
GCGUCUGGG	2.4126	1.9368	1.6716	2.3361	1.9669	2.1402	2.07737	2.37435	1.95185	1.9059
GGAUACCCG	2.1864	1.8446	1.8936	2.4136	2.0845	1.9169	2.0566	2.3	1.96455	1.90525
GUUCUCGGG	2.7043	2.1993	2.0895	2.0354	2.2201	1.7198	2.1614	2.36985	2.2097	1.90465
GGAUCAGAG	2.208	2.2336	2.0895	1.989	1.884	1.7198	2.02065	2.0985	2.0588	1.90465
GGCGUGGGA	2.0013	2.0231	1.8483	2.1685	2.1103	1.9602	2.01862	2.0849	2.0667	1.90425
GCGCCUCGC	2.0161	1.7553	1.8483	2.1224	1.7103	1.9602	1.9021	2.06925	1.7328	1.90425
CCCGGAGAG	1.9973	2.0456	1.8508	2.1454	2.3188	1.955	2.05215	2.07135	2.1822	1.9029
CGGGAAAAG	2.0317	1.9902	1.9927	2.2734	2.2954	1.8103	2.06562	2.15255	2.1428	1.9015
CGGGACCCG	2.3538	2.2607	2.0691	2.0757	1.799	1.7338	2.04868	2.21475	2.02985	1.90145
UCACCCGGA	1.9856	2.0651	2.0821	2.1299	2.0078	1.7198	1.99838	2.05775	2.03645	1.90095
CUGGGAGAA	2.3822	2.1565	1.9297	2.3768	1.6223	1.8716	2.05652	2.3795	1.8894	1.90065
CGGAGGGUC	2.291	2.6312	2.1141	2.2296	2.6032	1.6861	2.2592	2.2603	2.6172	1.9001
CACCGCGGG	1.9808	2.0036	2.0339	2.3016	1.961	1.7659	2.0078	2.1412	1.9823	1.8999
GACACCUGC	2.2684	2.0912	1.866	2.1288	2.1031	1.9331	2.0651	2.1986	2.09715	1.89955
GGCGGGUCU	2.2518	1.906	2.1174	2.0024	2.1807	1.6816	2.02332	2.1271	2.04335	1.8995
GGAGAACCG	2.2365	2.1827	2.0524	2.2885	2.1949	1.7453	2.11672	2.2625	2.1888	1.89885
GGCCGCGGA	2.1227	2.0641	2.0686	2.1114	2.0361	1.7289	2.02197	2.11705	2.0501	1.89875
GGGAUGCCC	2.1155	2.1308	1.8983	2.1948	1.5924	1.8977	1.97158	2.15515	1.8616	1.898
GCGCCCGGA	2.0322	2.1081	1.8749	2.1547	1.8658	1.9208	1.99275	2.09345	1.98695	1.89785
UGGGCCUGG	2.7155	2.5433	1.8489	2.2971	1.8658	1.9456	2.2027	2.5063	2.20455	1.89725
CCUGAGGUG	2.4557	1.7869	2.194	1.9666	2.031	1.6004	2.00577	2.21115	1.90895	1.8972
UAGGCACCC	2.1541	2.5527	2.1767	2.503	1.947	1.6174	2.15848	2.32855	2.24985	1.89705
CGAGCGACG	1.9869	1.8988	1.9165	2.0893	1.6978	1.8772	1.91108	2.0381	1.7983	1.89685
CUGGGGGUU	2.2058	2.7668	1.6716	2.36	1.6676	2.1211	2.13215	2.2829	2.2172	1.89635
GAGAACCGA	2.0171	2.1169	1.9378	2.2078	2.0748	1.8545	2.03482	2.11245	2.09585	1.89615
CCCGACGGC	2.2753	1.9735	1.923	1.9804	1.8299	1.8681	1.97503	2.12785	1.9017	1.89555
AACCGCCCG	2.0815	1.9651	2.0524	2.1221	2.0708	1.7385	2.00507	2.1018	2.01795	1.89545
GGACUUGGC	2.2977	2.0435	1.9011	2.0473	1.4588	1.8884	1.93947	2.1725	1.75115	1.89475
AGGAGAAGA	1.957	1.7742	1.6519	2.2666	1.8372	2.1376	1.93742	2.1118	1.8057	1.89475
CCCGAGCGG	1.9932	1.7668	1.8679	2.2919	2.1328	1.9201	1.99545	2.14255	1.9498	1.894
CAGGGAAGG	2.257	1.9041	1.7525	2.0301	1.6965	2.0342	1.94573	2.14355	1.8003	1.89335
GAGACACCU	2.0889	2.1147	1.8725	2.1816	2.2027	1.9109	2.06188	2.13525	2.1587	1.8917
CACACCCGA	2.2238	2.4059	1.9187	2.5248	2.5543	1.8644	2.24865	2.3743	2.4801	1.89155
CCGGCUUGA	2.3276	2.0961	2.1601	2.0618	1.8325	1.623	2.01685	2.1947	1.9643	1.89155
GGGAAGAGC	2.2748	1.5525	2.2149	2.3361	1.8386	1.5669	1.96397	2.30545	1.69555	1.8909
ACCCGCGAG	2.2016	2.3339	1.9445	2.1017	2.1205	1.8368	2.08983	2.15165	2.2272	1.89065
GCGGACCCG	1.979	2.1123	1.9812	2.1224	1.9586	1.7999	1.99223	2.0507	2.03545	1.89055
CCGAGGCCC	2.1027	2.3173	1.7843	2.0913	2.1882	1.9944	2.0797	2.097	2.25275	1.88935
UGCCCGGAA	2.2381	2.2278	1.9321	2.2104	2.2823	1.8464	2.12285	2.22425	2.25505	1.88925
GUACCCGGG	1.9367	2.4375	2.1132	2.2476	1.9852	1.6652	2.06423	2.09215	2.21135	1.8892
GACCCCGCC	2.1664	2.149	1.9426	2.1278	1.8135	1.8356	2.00582	2.1471	1.98125	1.8891
UUUGGGGUC	2.3437	2.0751	2.1731	2.0739	1.2186	1.6051	1.91492	2.2088	1.64685	1.8891
GCGUGGCUG	2.521	2.4243	1.9104	2.1659	1.5759	1.8672	2.07745	2.34345	2.0001	1.8888
GGGCUCGGA	2.3202	2.3619	1.8755	2.2326	1.9711	1.9016	2.11048	2.2764	2.1665	1.88855
GGGUGUGGG	2.2518	2.7054	1.5602	2.8606	1.4538	2.2166	2.17473	2.5562	2.0796	1.8884
GGCCCGACG	1.9676	1.7908	1.8488	2.2079	1.9802	1.9257	1.9535	2.08775	1.8855	1.88725
CACCCCAGA	2.2434	1.8569	1.9515	2.0177	2.1016	1.8222	1.99888	2.13055	1.97925	1.88685
AAAGCCCGG	1.9865	2.1967	1.7822	2.5745	2.1224	1.9908	2.10885	2.2805	2.15955	1.8865
CGAGAAGAG	1.9558	2.0698	1.7571	2.5446	2.1479	2.0131	2.08138	2.2502	2.10885	1.8851
CGAGAAUUG	2.1036	2.1149	1.753	2.4907	2.0789	2.0163	2.0929	2.29715	2.0969	1.88465
UGGAGAAUC	2.4976	2.0852	1.9745	1.8656	1.7847	1.7946	2.00037	2.1816	1.93495	1.88455
ACCCGGAGA	2.0527	2.2442	1.9973	2.2726	2.2234	1.7708	2.0935	2.16265	2.2338	1.88405
CUGGAAGGC	2.2452	2.1476	2.1134	1.9615	1.9058	1.6543	2.00463	2.10335	2.0267	1.88385
GCCCGAUUC	2.3161	2.152	1.8388	2.1359	1.8814	1.9262	2.04173	2.226	2.0167	1.8825
CUCGGGGUC	2.2494	2.1115	1.8036	2.0702	1.7216	1.9612	1.98625	2.1598	1.91655	1.8824
CUCGGGAAU	2.3706	2.137	1.8347	1.9885	2.4403	1.9295	2.11677	2.17955	2.28865	1.8821
CACCCGCUG	2.0804	1.8778	1.8218	2.2163	2.0339	1.9419	1.99535	2.14835	1.95585	1.88185
CCGGGGUCC	2.4382	1.9983	2.0431	2.2779	2.3755	1.7198	2.14213	2.35805	2.1869	1.88145
CCCGCCGGC	2.2869	2.2434	1.7563	1.8652	1.7421	2.0064	1.98338	2.07605	1.99275	1.88135
UCCGGGAGA	2.211	2.0012	1.9239	2.6987	1.791	1.8388	2.07743	2.45485	1.8961	1.88135
GGAUUCGAG	2.0117	2.221	2.0062	2.3352	1.466	1.7549	1.96583	2.17345	1.8435	1.88055
CCCGAAAAG	2.0608	2.0309	1.8715	2.2381	2.2265	1.8891	2.05282	2.14945	2.1287	1.8803
GCGCCUGGG	2.3661	2.1437	1.8072	1.9715	2.1148	1.9522	2.05925	2.1688	2.12925	1.8797
GAAGCACCC	2.1596	2.1799	1.8188	2.1604	1.9196	1.9403	2.02977	2.16	2.04975	1.87955
CGAGAAAUG	1.9818	1.6552	1.7103	2.4392	2.1875	2.0474	2.00357	2.2105	1.92135	1.87885
UCCGAGCCG	2.0758	2.0542	1.9597	2.1779	1.7929	1.798	1.97642	2.12685	1.92355	1.87885
UGGGUUAGA	2.1239	2.1686	1.9585	2.4354	1.6641	1.7973	2.02463	2.27965	1.91635	1.8779
UGAGAAUUC	2.1432	2.3812	1.9201	2.0804	1.6559	1.8345	2.00255	2.1118	2.01855	1.8773
CCCGACCGA	2.0876	1.9713	1.9434	2.3251	1.8907	1.8095	2.0046	2.20635	1.931	1.87645
GAGCCCGAC	2.3154	2.1126	1.9788	2.2616	2.0392	1.7737	2.08022	2.2885	2.0759	1.87625
CCCGAGAUU	2.2624	1.8919	2.1645	1.9437	2.1379	1.5875	1.99798	2.10305	2.0149	1.876
GGGAAAGCC	2.0452	2.0675	1.9753	2.2004	1.6492	1.7765	1.95235	2.1228	1.85835	1.8759
CGAGAGAGA	2.0383	1.7851	1.9872	2.6914	2.2207	1.763	2.08095	2.36485	2.0029	1.8751
CCGGUUCCG	2.1693	1.8988	1.7761	2.1034	1.6789	1.9727	1.9332	2.13635	1.78885	1.8744
CGGGAAUGG	2.053	2.0451	1.9539	2.6118	1.8684	1.7946	2.05447	2.3324	1.95675	1.87425
GAUGGCCGA	1.9481	2.2723	1.9701	2.1558	1.6174	1.778	1.95695	2.05195	1.94485	1.87405
CCUGAAGGA	2.1533	2.2398	1.9901	2.125	2.2479	1.758	2.08568	2.13915	2.24385	1.87405
CCUGACACC	1.9531	2.2955	1.7351	2.1454	2.3375	2.0128	2.0799	2.04925	2.3165	1.87395
CGGGGUGGC	2.256	2.0402	1.697	2.0804	1.8658	2.0499	1.99822	2.1682	1.953	1.87345
CCGGGCUUG	2.5091	1.9737	1.8889	2.4029	2.3346	1.8574	2.1611	2.456	2.15415	1.87315
CCCCCCGAG	2.4471	2.2332	1.8865	2.36	2.089	1.859	2.1458	2.40355	2.1611	1.87275
UCCGAGAGG	2.0955	2.1212	1.9324	2.174	2.2063	1.8115	2.05682	2.13475	2.16375	1.87195
CGAGGAAGA	1.9877	1.9341	1.7288	2.1385	1.9303	2.0148	1.9557	2.0631	1.9322	1.8718
CGCCGAAGG	1.9607	2.1007	1.9474	2.209	1.7816	1.7962	1.96593	2.08485	1.94115	1.8718
GGCACCUCG	2.2816	2.1044	1.8364	2.2965	1.897	1.9055	2.05357	2.28905	2.0007	1.87095
ACACCCAGA	2.0936	1.9329	1.7898	2.1074	1.9924	1.9516	1.97795	2.1005	1.96265	1.8707
CGCCCGACA	2.0725	1.8024	1.7843	2.2342	1.9702	1.9559	1.96992	2.15335	1.8863	1.8701
CGCACCUGA	2.0291	2.0379	1.8256	2.1108	1.9965	1.914	1.98565	2.06995	2.0172	1.8698
ACCCAGAAG	1.9818	1.8061	1.6852	2.1156	2.1179	2.0542	1.96013	2.0487	1.962	1.8697
GCACCCGUC	2.1306	2.4839	1.9022	2.0967	1.9824	1.8371	2.07215	2.11365	2.23315	1.86965
CACCCUUGA	2.0617	2.0039	1.6546	2.4705	1.9241	2.0846	2.03323	2.2661	1.964	1.8696
CGGCUCGGG	2.585	2.5875	1.7645	1.9468	2.5655	1.9746	2.23732	2.2659	2.5765	1.86955
GUCCGAAGG	1.9531	1.9843	1.9661	2.1454	1.7881	1.7719	1.93482	2.04925	1.8862	1.869
CCCGGGCUU	2.0577	1.7757	2.1463	2.1348	1.8954	1.5915	1.93357	2.09625	1.83555	1.8689
CCGAGGGCC	2.0758	1.897	1.9916	2.2104	1.6472	1.7459	1.92798	2.1431	1.7721	1.86875
CAACCGGGA	2.0571	1.8155	2.0302	2.32	2.0605	1.7063	1.99827	2.18855	1.938	1.86825
GCCCCAGAA	2.2916	2.0114	1.925	2.1074	1.7535	1.8113	1.98337	2.1995	1.88245	1.86815
AGCCGAGGC	2.06	1.8017	1.8028	2.2619	2.0136	1.9331	1.97885	2.16095	1.90765	1.86795
UUCGCGGGG	2.4483	2.099	2.0751	2.2687	1.8135	1.6605	2.06085	2.3585	1.95625	1.8678
UCGAGAGGA	2.1336	1.947	2.024	2.6336	2.2194	1.7107	2.11138	2.3836	2.0832	1.86735
GGGUUCGAG	2.1124	2.6478	1.8483	2.5838	2.0689	1.8862	2.19123	2.3481	2.35835	1.86725
CUUGGGAGU	2.068	1.9802	2.0817	2.2296	1.4714	1.6524	1.91388	2.1488	1.7258	1.86705
CCUCGCGGA	2.1085	2.246	2.0883	2.3389	2.324	1.6456	2.12522	2.2237	2.285	1.86695
CCCGAGUGC	2.0341	2.2225	1.7957	2.1572	2.3973	1.936	2.09047	2.09565	2.3099	1.86585
CCGGCCGGG	2.269	1.7677	1.9154	1.8872	2.0488	1.8153	1.95057	2.0781	1.90825	1.86535
CCUCGAGAA	2.1193	2.3253	1.8884	2.4041	2.2107	1.8418	2.1316	2.2617	2.268	1.8651
CCGAGAACU	1.9256	1.7744	1.7463	2.0832	1.952	1.9815	1.9105	2.0044	1.8632	1.8639
CGCCCGCAG	2.3836	2.06	1.82	2.0987	2.026	1.9073	2.04927	2.24115	2.043	1.86365
AGGGCCCGA	1.9185	2.289	1.8341	2.4125	1.6846	1.8925	2.0052	2.1655	1.9868	1.8633
GCGCACCCG	2.2005	2.4121	2.036	2.4388	2.3024	1.6904	2.18003	2.31965	2.35725	1.8632
CCCCGACGG	2.4478	1.9261	2.1037	2.1698	2.0157	1.6223	2.04757	2.3088	1.9709	1.863
GGCUGGGGA	2.0262	2.3197	2.1278	2.1238	1.7103	1.5982	1.98433	2.075	2.015	1.863
CCCCGGCCC	2.3148	2.203	1.9381	2.3422	1.9437	1.7874	2.0882	2.3285	2.07335	1.86275
GGGUCGCCG	2.3049	2.0751	1.9328	1.8773	2.0845	1.7915	2.01102	2.0911	2.0798	1.86215
CGGGUCCGG	2.0366	2.3267	2.0044	2.0804	1.6617	1.7198	1.9716	2.0585	1.9942	1.8621
CCGUGGGGG	2.3634	1.9763	2.2089	2.1454	1.8783	1.5151	2.01457	2.2544	1.9273	1.862
UGACGCCCC	2.1706	2.2468	1.9063	2.4193	2.0879	1.8174	2.10805	2.29495	2.16735	1.86185
CGGCGUCUG	2.2649	2.0892	2.1322	1.8681	2.2252	1.5911	2.02845	2.0665	2.1572	1.86165
AGGUUCCGG	2.4299	1.7754	1.6298	2.1454	1.9883	2.0924	2.0102	2.28765	1.88185	1.8611
CCCGGGACU	2.3204	2.2472	1.8953	2.0548	1.6802	1.8248	2.00378	2.1876	1.9637	1.86005
GCGGCCCGG	2.2058	2.1993	1.9031	2.5085	2.1511	1.8168	2.13077	2.35715	2.1752	1.85995
GGGCAUCGG	2.2624	2.0101	2.0145	1.9071	2.2366	1.7051	2.02263	2.08475	2.12335	1.8598
CCGGCUGGC	2.2467	1.7535	1.9502	1.9247	1.8212	1.7693	1.91093	2.0857	1.78735	1.85975
GAAAUCCGA	1.9212	2.1659	1.87	2.1316	2.0193	1.8493	1.99288	2.0264	2.0926	1.85965
CGGGACACC	2.1153	2.0706	1.9881	2.2716	2.2134	1.731	2.065	2.19345	2.142	1.85955
CCCGGCCCG	2.3388	2.1212	1.9582	2.2782	1.9241	1.7608	2.06355	2.3085	2.02265	1.8595
CAUCUGAGA	2.0023	2.3496	1.7788	2.7925	2.3517	1.9382	2.20218	2.3974	2.35065	1.8585
UGUGCCCGA	1.9802	2.1296	1.7976	2.2365	1.7259	1.9178	1.9646	2.10835	1.92775	1.8577
GACCCCCAG	2.2876	1.9358	1.8507	2.1061	1.8466	1.8647	1.98192	2.19685	1.8912	1.8577
AGCGCCGAG	2.2136	2.1173	2.0012	2.0951	1.9874	1.7117	2.02105	2.15435	2.05235	1.85645
GCCCGAAGC	2.05	2.013	1.7976	2.1143	2.2086	1.9142	2.01628	2.08215	2.1108	1.8559
CGCGGCCUG	2.1942	2.0784	1.9659	2.4577	1.8248	1.744	2.04417	2.32595	1.9516	1.85495
CUGGCGCCC	1.9935	2.1935	1.9433	2.1068	1.8895	1.7663	1.98215	2.05015	2.0415	1.8548
CACCCAGAG	2.0949	2.1328	1.9178	2.1231	2.2248	1.7915	2.04748	2.109	2.1788	1.85465
CACCCGGUA	2.1344	2.2557	1.692	2.0851	2.1328	2.0168	2.0528	2.10975	2.19425	1.8544
UGCCCGGAG	2.2536	2.6604	1.9449	2.5305	2.2448	1.7639	2.23302	2.39205	2.4526	1.8544
CCUCCGGGA	2.2707	2.2243	1.7798	1.9519	1.9166	1.9289	2.01203	2.1113	2.07045	1.85435
CCGAAGAGG	2.1398	1.9694	1.7613	2.2944	1.697	1.9467	1.9681	2.2171	1.8332	1.854
UGGGAAAGG	2.269	1.8446	1.9154	2.2348	2.0043	1.7915	2.00993	2.2519	1.92445	1.85345
ACUCCGGGA	1.983	2.0341	1.9161	2.3708	1.9153	1.7905	2.00163	2.1769	1.9747	1.8533
UCCCGAGGG	2.2334	2.1028	1.6883	1.888	2.0267	2.0179	1.99285	2.0607	2.06475	1.8531
CUGAGGGGU	2.2288	2.275	2.0617	2.0501	1.8386	1.6434	2.01627	2.13945	2.0568	1.85255
CCGGGGAUG	2.3518	1.7089	1.9175	2.6082	2.1882	1.7872	2.09363	2.48	1.94855	1.85235
CGAGAUUCC	2.0212	1.7508	1.8375	2.6182	1.4132	1.8655	1.91773	2.3197	1.582	1.8515
CGCCUGUGA	2.1063	2.2417	1.9193	2.5427	1.7103	1.7835	2.05063	2.3245	1.976	1.8514
GCGAGAAUG	2.0486	1.8575	1.7643	2.2965	2.0958	1.9378	2.00008	2.17255	1.97665	1.85105
GAGGUUCCU	2.3935	2.3057	1.9502	2.4235	2.0666	1.7517	2.14853	2.4085	2.18615	1.85095
CCGGAGAAU	2.1227	2.4594	1.9705	2.293	2.1176	1.7289	2.11535	2.20785	2.2885	1.8497
CCCCGGAGA	2.0799	2.3375	1.8402	2.4537	1.9684	1.8582	2.08965	2.2668	2.15295	1.8492
AGAGAGUCG	2.3098	1.8607	1.6863	1.9572	2.0029	2.0115	1.9714	2.1335	1.9318	1.8489
UCCGGCAGG	2.1987	2.2421	2.0175	1.8742	2.0568	1.6803	2.0116	2.03645	2.14945	1.8489
GUGUCUGGC	1.9426	2.3197	1.8554	2.1238	1.5937	1.8414	1.9461	2.0332	1.9567	1.8484
CGGGGAGGG	2.1507	2.4717	1.9998	2.4601	2.155	1.6969	2.1557	2.3054	2.31335	1.84835
GGCCCGAAG	2.2264	2.099	1.7581	2.0057	2.1232	1.9372	2.02493	2.11605	2.1111	1.84765
CUCGGUUGG	2.2467	2.5619	1.8264	1.96	2.1854	1.8684	2.10813	2.10335	2.37365	1.8474
GGUCGUGGG	2.0297	1.947	1.654	2.6222	1.7103	2.0383	2.00025	2.32595	1.82865	1.84615
GCCCGCCCG	2.1719	1.991	1.8814	2.2135	1.8325	1.8108	1.98352	2.1927	1.91175	1.8461
GGCGCCGAG	2.1036	1.7173	1.7724	2.2194	2.2338	1.9175	1.994	2.1615	1.97555	1.84495
CCCGAGGAU	2.2459	2.7966	1.9143	2.3531	2.0276	1.7753	2.18547	2.2995	2.4121	1.8448
CACCGGAGC	1.9214	1.8809	1.8533	2.0948	2.111	1.8327	1.94902	2.0081	1.99595	1.843
CCACCGGGG	2.3867	1.9933	1.8963	2.2762	1.9862	1.7876	2.05438	2.33145	1.98975	1.84195
CCCGAGUGA	1.9862	2.4073	1.8566	2.5939	2.0002	1.8267	2.11182	2.29005	2.20375	1.84165
GACCCGCGA	1.9895	2.3169	1.9775	2.2094	1.9085	1.7058	2.01793	2.09945	2.1127	1.84165
CACCCGAAC	1.9854	2.1704	1.7088	2.458	2.5194	1.9704	2.1354	2.2217	2.3449	1.8396
UGGCGCUCG	2.0121	2.3431	1.9129	2.2807	1.7681	1.7663	2.01387	2.1464	2.0556	1.8396
UCUGGUCGG	2.068	2.5619	1.81	2.1189	1.3778	1.8684	1.9675	2.09345	1.96985	1.8392
ACCCGAAAA	2.0303	1.9779	1.7203	2.179	2.3801	1.9572	2.0408	2.10465	2.179	1.83875
GACCGGCGG	2.3577	2.2054	1.9987	2.1351	1.6546	1.6783	2.00497	2.2464	1.93	1.8385
GCGUUGCGG	2.1097	2.3476	2.0086	2.1671	1.9824	1.6677	2.04718	2.1384	2.165	1.83815
CUGCCCGCC	2.2895	1.9104	2.0955	1.982	1.9699	1.5806	1.97132	2.13575	1.94015	1.83805
CUUGGCUGG	2.4892	2.1007	2.0199	1.9071	1.4609	1.6561	1.93898	2.19815	1.7808	1.838
GCCGAGACC	2.2522	2.2659	1.8373	2.1331	1.9794	1.8384	2.05105	2.19265	2.12265	1.83785
GCCCCAGGG	2.1326	2.0559	1.931	2.1901	1.844	1.7437	1.98288	2.16135	1.94995	1.83735
ACCCAGGGA	2.5173	2.1739	1.791	2.1071	2.073	1.8836	2.09098	2.3122	2.12345	1.8373
GGGAUGGAA	2.2196	1.9737	1.8388	2.0024	1.8472	1.8345	1.9527	2.111	1.91045	1.83665
CCCCGAAGG	2.239	1.8862	1.7847	2.0218	1.9868	1.8879	1.96773	2.1304	1.9365	1.8363
GCCAGGGGC	1.9831	1.6601	1.979	2.1344	1.9735	1.6933	1.9039	2.05875	1.8168	1.83615
GCGUUCCGC	2.0062	1.7482	1.7355	2.1775	1.9145	1.9337	1.91927	2.09185	1.83135	1.8346
CGCCUGGCG	2.1172	1.9236	1.9821	2.0841	1.9424	1.687	1.95607	2.10065	1.933	1.83455
UAACACCCG	2.1043	2.3421	1.6926	2.2207	2.2617	1.9763	2.09962	2.1625	2.3019	1.83445
UGCUCGAGC	2.0565	2.3211	1.8725	2.4077	1.9027	1.7962	2.05945	2.2321	2.1119	1.83435
GACUACCCG	2.0479	2.2475	1.887	2.6662	1.9677	1.781	2.09955	2.35705	2.1076	1.834
GAGGAGCCC	2.0592	2.0897	1.9696	2.1545	1.9485	1.698	1.98658	2.10685	2.0191	1.8338
GCCCGAUGC	1.9583	2.2638	1.749	2.1129	2.0407	1.9152	2.00665	2.0356	2.15225	1.8321
CUCGGGGAG	2.0483	2.5297	1.8297	2.3702	2.089	1.8345	2.1169	2.20925	2.30935	1.8321
CGGGUUUUC	2.2595	2.3057	1.8806	1.8673	2.1735	1.7835	2.04502	2.0634	2.2396	1.83205
CCCCCGGCG	2.3608	2.0736	1.8956	1.9351	1.9786	1.7685	2.00203	2.14795	2.0261	1.83205
CUUGGAGGA	2.1946	2.2022	1.9787	2.1308	1.9634	1.6847	2.02573	2.1627	2.0828	1.8317
GGGUUUUCG	1.9884	2.0929	2.0309	2.2004	2.0721	1.6316	2.00272	2.0944	2.0825	1.83125
CCGAGGAAU	2.635	2.0826	1.739	2.3531	1.9448	1.9232	2.11295	2.49405	2.0137	1.8311
GACUCGGGA	2.444	2.5321	1.8692	1.9504	2.0757	1.7928	2.1107	2.1972	2.3039	1.831
UGACCCCGC	2.1358	1.8824	1.7819	2.2744	1.8505	1.8796	1.96743	2.2051	1.86645	1.83075
CCCGAGGCC	2.0328	2.1363	1.7998	2.1017	2.2514	1.8602	2.03037	2.06725	2.19385	1.83
CCCGGGCUC	2.295	2.0616	1.8388	2.2043	2.2939	1.821	2.08577	2.24965	2.17775	1.8299
UGCCCCGGC	2.3708	2.0256	1.8044	1.9783	1.9181	1.8537	1.99182	2.17455	1.97185	1.82905
CCCCCCCUG	2.1948	2.1491	2.0028	1.8756	1.8697	1.6549	1.95782	2.0352	2.0094	1.82885
UGAGCCCGG	2.1111	2.1184	2.0275	2.2348	1.864	1.6302	1.99767	2.17295	1.9912	1.82885
CCUGAGGCA	2.004	2.2534	1.7663	2.2118	1.8778	1.8912	2.00075	2.1079	2.0656	1.82875
ACAUCCGGG	2.0169	2.152	1.81	2.4368	1.7578	1.8472	2.00345	2.22685	1.9549	1.8286
GUCCCGAGC	2.1875	2.1397	1.8834	2.1168	1.8985	1.7733	1.99987	2.15215	2.0191	1.82835
UUGGGAAAG	2.2403	1.9598	1.8955	1.8645	2.0387	1.7608	1.95993	2.0524	1.99925	1.82815
CUCCGAGAG	2.1518	1.9567	1.9053	2.8219	1.9068	1.7508	2.08222	2.48685	1.93175	1.82805
GGAGGAGAG	1.9167	1.9345	1.7537	3.035	2.0023	1.9016	2.09063	2.47585	1.9684	1.82765
CCCCGGAAG	2.3852	2.3996	1.8491	2.2657	2.1455	1.806	2.14185	2.32545	2.27255	1.82755
CCCGGGCCC	2.1605	2.0055	1.8775	2.1598	1.7046	1.7775	1.94757	2.16015	1.85505	1.8275
GAUGCACCC	1.9781	2.013	1.6608	2.0895	1.8182	1.994	1.9256	2.0338	1.9156	1.8274
CACCUGGAA	1.9716	2.1477	1.8266	2.1004	1.8927	1.828	1.96117	2.036	2.0202	1.8273
GGAGGGUUC	2.2536	2.8023	2.1538	2.3105	1.4308	1.4993	2.07505	2.28205	2.11655	1.82655
GCUCCCGAG	2.2432	2.2822	1.785	1.8909	2.1089	1.8655	2.02928	2.06705	2.19555	1.82525
GCCCGAACC	2.068	2.0937	1.8176	2.3592	2.3148	1.8318	2.08085	2.2136	2.20425	1.8247
AGACCCGCG	2.1639	2.1253	1.9539	2.2885	1.8516	1.6949	2.01302	2.2262	1.98845	1.8244
CCGCGAGAU	1.9828	2.0414	1.742	2.282	1.5998	1.9066	1.92577	2.1324	1.8206	1.8243
CGGGCCCCG	2.2005	2.084	1.9047	1.9254	1.9858	1.7419	1.97372	2.06295	2.0349	1.8233
CCUGGCCCG	2.3207	2.234	1.6438	2.1295	1.9384	2.0001	2.04442	2.2251	2.0862	1.82195
CCGAGGGGA	2.2084	2.3911	1.7954	1.9335	2.0429	1.8472	2.03642	2.07095	2.217	1.8213
CCCGGCGGA	2.1071	2.2114	1.9214	2.1942	1.9095	1.7198	2.01057	2.15065	2.06045	1.8206
GACAUCGGG	2.2403	2.0587	1.7164	1.8645	1.8554	1.9245	1.9433	2.0524	1.95705	1.82045
GACGCCCCC	2.201	2.1951	1.8769	1.9071	1.9279	1.7634	1.97857	2.05405	2.0615	1.82015
ACCCACCCG	2.0484	2.1505	1.8023	2.1827	2.1886	1.8366	2.03485	2.11555	2.16955	1.81945
CUCCGGGAA	2.1127	1.9404	2.0281	2.1733	1.9158	1.6081	1.96307	2.143	1.9281	1.8181
CGCCUGGGA	2.2977	1.9711	2.1469	1.9912	1.6349	1.4838	1.92093	2.14445	1.803	1.81535
CGCACCCGC	1.9461	1.9512	1.7731	2.1698	1.7976	1.8563	1.91568	2.05795	1.8744	1.8147
UGCGCGGAG	2.2443	1.9304	1.7883	2.029	1.8794	1.8398	1.95187	2.13665	1.9049	1.81405
CCGAGACCC	2.0727	2.1983	1.7275	2.0965	2.0032	1.9004	1.99977	2.0846	2.10075	1.81395
CCGGAGGCG	2.1697	2.0411	1.9707	2.0868	1.8295	1.654	1.95863	2.12825	1.9353	1.81235
GACGACCGG	2.2618	2.1328	1.7848	2.1901	1.9241	1.8392	2.02213	2.22595	2.02845	1.812
GGGAAGGAA	2.1978	2.1654	1.8291	2.1558	1.9706	1.7946	2.01888	2.1768	2.068	1.81185
ACGGCCCGA	2.0856	1.8761	1.8004	2.286	2.1379	1.8227	2.00145	2.1858	2.007	1.81155
GAGAGAGCC	2.0098	1.9557	1.9356	2.2057	1.8855	1.6853	1.94627	2.10775	1.9206	1.81045
GGUCGAGGU	2.3049	1.931	1.8283	1.9666	2.0043	1.7915	1.9711	2.13575	1.96765	1.8099
CGAGGAGGA	2.022	2.1366	1.9567	2.1931	1.9669	1.6625	1.98963	2.10755	2.05175	1.8096
GACGCGAGG	2.1993	2.2984	1.8308	2.066	2.199	1.7835	2.06283	2.13265	2.2487	1.80715
CCCGAUGAG	2.1298	2.1165	1.9229	2.1821	2.3353	1.6904	2.06283	2.15595	2.2259	1.80665
CACCCGGAU	2.1569	2.1222	1.8121	2.2454	1.9034	1.7999	2.00665	2.20115	2.0128	1.806
GAAUUCGGG	2.2485	2.13	1.8905	2.2476	1.5576	1.7198	1.96567	2.24805	1.8438	1.80515
UGACCCUGG	1.9169	2.0214	1.6467	2.312	1.5815	1.9632	1.90695	2.11445	1.80145	1.80495
GGUCUGGGG	2.626	2.152	2.189	2.1795	1.7103	1.4195	2.04605	2.40275	1.93115	1.80425
GCCCCGGCC	2.1849	1.8284	1.8378	1.974	1.8754	1.7701	1.91177	2.07945	1.8519	1.80395
AUCGGGGGG	1.9426	1.7607	2.0427	2.7956	1.5743	1.5635	1.94657	2.3691	1.6675	1.8031
CCCGGAAGC	2.038	2.037	1.8611	2.3133	2.0636	1.7447	2.00962	2.17565	2.0503	1.8029
CGGGGUAGG	2.2467	2.3911	1.6097	2.4368	1.5678	1.9958	2.04132	2.34175	1.97945	1.80275
UCACACCCG	2.0187	1.9857	1.9317	2.3498	2.2121	1.673	2.0285	2.18425	2.0989	1.80235
GAGGUUCCG	1.9619	1.8682	2.0453	2.6405	2.0063	1.5581	2.01338	2.3012	1.93725	1.8017
GGCGGUCAG	2.4215	1.9155	1.7788	2.0171	2.2037	1.8227	2.02655	2.2193	2.0596	1.80075
UCACCCGGC	1.9327	2.0342	1.9057	2.1388	1.7743	1.693	1.91312	2.03575	1.90425	1.79935
CGCCCGGUC	2.0758	1.9913	1.8256	2.3892	1.8804	1.7719	1.98903	2.2325	1.93585	1.79875
AUCCGGGAG	2.2058	1.8651	1.8388	2.1295	1.9099	1.758	1.95118	2.16765	1.8875	1.7984
CGCCCGACG	2.1328	2.0416	1.9781	2.0782	2.0721	1.6169	1.98662	2.1055	2.05685	1.7975
GCCCGACCG	1.9262	2.2566	1.9521	2.1201	2.1834	1.6426	2.0135	2.02315	2.22	1.79735
GGUGCUCGG	2.2618	2.1904	1.8022	1.922	1.4431	1.7915	1.90183	2.0919	1.81675	1.79685
GAGGACUGC	2.1952	1.802	1.8645	1.8704	1.9735	1.7286	1.9057	2.0328	1.88775	1.79655
GCCCGCGAG	2.0279	2.1877	1.9922	2.0789	1.9092	1.5998	1.96595	2.0534	2.04845	1.796
UGACGCCGG	2.3757	2.4539	1.6866	2.2987	2.1074	1.9041	2.13773	2.3372	2.28065	1.79535
CCCGGCCGG	2.0742	2.1271	1.9585	2.1519	1.7797	1.632	1.9539	2.11305	1.9534	1.79525
GUCCCGGGA	2.0117	2.0328	1.8342	2.2184	2.1205	1.7549	1.99542	2.11505	2.07665	1.79455
CCCCGGAUU	2.336	2.4287	1.7366	1.8753	1.8671	1.8472	2.01515	2.10565	2.1479	1.7919
ACCCGAAGG	2.032	2.1734	1.7292	2.2263	2.0301	1.8544	2.00757	2.12915	2.10175	1.7918
AGACCCGGA	2.3216	2.1397	1.8588	1.8765	1.9293	1.7244	1.97505	2.09905	2.0345	1.7916
CCCUGGAAG	2.3167	2.1678	1.9043	1.8726	1.9175	1.6784	1.97622	2.09465	2.04265	1.79135
GAGAUACCC	2.1423	2.2786	1.8064	2.3417	1.8738	1.776	2.03647	2.242	2.0762	1.7912
GCAUCCGAA	1.9442	1.9234	1.6612	2.396	2.0392	1.9207	1.98078	2.1701	1.9813	1.79095
GCCCGGGGG	2.6455	2.2683	1.7846	2.3194	2.6002	1.7973	2.23588	2.48245	2.43425	1.79095
CGGGACCGG	1.9914	2.0623	2.0207	2.1852	1.9063	1.5606	1.95442	2.0883	1.9843	1.79065
GCCGGGAAA	2.0284	1.8234	1.8273	2.1537	2.0789	1.7527	1.94407	2.09105	1.95115	1.79
UGCGGGGGG	2.0053	2.138	2.0682	2.1454	1.7492	1.5113	1.93623	2.07535	1.9436	1.78975
GAGCUCGGG	2.1984	2.717	1.8749	2.1261	1.6988	1.7043	2.05325	2.16225	2.2079	1.7896
CCGGGCCCG	2.2166	2.0073	1.8929	2.2436	1.9618	1.6861	2.00138	2.2301	1.98455	1.7895
AGCACCCGC	1.9142	1.8942	1.7241	2.2445	1.9636	1.8521	1.93212	2.07935	1.9289	1.7881
UGACUCGAG	1.941	2.0873	1.8404	2.1266	1.9241	1.7349	1.94238	2.0338	2.0057	1.78765
GCCUGAGAG	2.0429	2.2805	1.5524	2.2104	1.7492	2.0221	1.97625	2.12665	2.01485	1.78725
CUGAUGCCC	2.3154	1.9746	1.7359	2.3105	2.1215	1.8374	2.04922	2.31295	2.04805	1.78665
CGGCCUUGG	2.2924	2.2521	1.6522	2.029	1.7004	1.9198	1.97432	2.1607	1.97625	1.786
CCGCGGGGA	2.3388	2.0751	1.8507	1.9156	1.9699	1.7198	1.97832	2.1272	2.0225	1.78525
CUGAGAAGC	2.0161	1.9933	1.806	2.3223	2.1241	1.763	2.00413	2.1692	2.0587	1.7845
CUGAGAUGG	2.094	2.3144	1.8548	2.1319	1.9362	1.709	2.00672	2.11295	2.1253	1.7819
GCCCGAUCC	2.1239	2.0274	1.7561	2.2936	1.9992	1.8076	2.0013	2.20875	2.0133	1.78185
CCGGGUUGU	2.1664	1.9763	1.9901	2.0841	1.7592	1.5724	1.92475	2.12525	1.86775	1.78125
CCGCCCGGC	2.131	2.158	1.8357	2.1501	2.0457	1.7236	2.00735	2.14055	2.10185	1.77965
GGUCGGAGG	2.0149	1.9155	1.7068	2.2004	1.8748	1.8521	1.92742	2.10765	1.89515	1.77945
CCGGAAAAG	2.2274	1.9261	1.7797	1.9654	1.8063	1.7783	1.91387	2.0964	1.8662	1.779
UUGCCCGGG	2.737	2.4142	1.77	2.1454	2.3014	1.7872	2.19253	2.4412	2.3578	1.7786
CUGACGCCC	1.9392	2.0878	1.6667	2.0904	1.8889	1.8899	1.92715	2.0148	1.98835	1.7783
ACCCGAUCC	2.031	1.8446	1.8096	2.2558	2.0145	1.7467	1.95037	2.1434	1.92955	1.77815
CUCGAGGGA	2.0329	2.0478	1.9423	2.206	2.2829	1.6129	2.0208	2.11945	2.16535	1.7776
CCGGGAAGC	2.2868	1.9031	1.6982	2.0887	2.4637	1.8563	2.04947	2.18775	2.1834	1.77725
GCCCGACCC	2.1654	2.01	1.8745	2.1299	1.9172	1.6762	1.9622	2.14765	1.9636	1.77535
CCACGAGAA	2.0754	1.909	1.7003	2.2454	2.2758	1.8493	2.0092	2.1604	2.0924	1.7748
CCGUGCCCG	1.9614	2.4436	1.8474	2.0791	1.9572	1.7021	1.99847	2.02025	2.2004	1.77475
CCUAGGAUC	2.0045	2.1601	2.0252	2.2019	1.7553	1.5237	1.94512	2.1032	1.9577	1.77445
AUCGCCCGG	2.2142	1.9843	2.0009	2.0588	1.8853	1.5461	1.94827	2.1365	1.9348	1.7735
CCCGGUUUC	2.1584	2.2074	2.0996	2.2509	1.472	1.4473	1.93927	2.20465	1.8397	1.77345
GGCGUCGGG	2.1868	1.9718	1.8446	1.9728	2.0789	1.7	1.95915	2.0798	2.02535	1.7723
CCCGAUGCC	1.9168	2.1924	1.7838	2.0952	2.1829	1.76	1.98852	2.006	2.18765	1.7719
GCGAGGAUG	2.0105	2.0751	1.9193	2.0858	1.7371	1.6243	1.90868	2.04815	1.9061	1.7718
CCACACCCG	2.0764	2.2438	1.7811	2.503	2.1744	1.7617	2.09007	2.2897	2.2091	1.7714
GAAGACCUG	1.9376	2.2018	1.8067	2.1776	2.0339	1.7353	1.98215	2.0576	2.11785	1.771
CCGCCCGAC	2.1943	2.086	1.8729	2.254	1.9946	1.6688	2.01177	2.22415	2.0403	1.77085
CCCCCGAAG	2.2822	2.0686	1.818	1.9555	2.0075	1.723	1.9758	2.11885	2.03805	1.7705
CGCCCGACC	2.1561	2.0912	1.7342	2.2369	2.1329	1.8065	2.0263	2.1965	2.11205	1.77035
CCUGAGAGU	1.9577	2.2873	1.7976	2.3457	1.9754	1.7427	2.01773	2.1517	2.13135	1.77015
GAGGGCGGA	1.9531	2.152	1.7655	2.1454	1.7103	1.7744	1.91678	2.04925	1.93115	1.76995
UUCCCGGGA	2.2547	2.3057	1.9154	2.2348	1.9776	1.6243	2.05208	2.24475	2.14165	1.76985
CCUCACCCG	1.9463	1.8581	1.7348	2.0823	2.0279	1.8041	1.90892	2.0143	1.943	1.76945
CCGACACCU	2.0328	1.9523	1.6032	2.3803	1.8258	1.9332	1.9546	2.20655	1.88905	1.7682
UGGCCCGAC	2.0324	1.9967	1.7373	2.1528	1.772	1.7966	1.91463	2.0926	1.88435	1.76695
GGAUGACGA	2.0764	2.1257	1.8839	2.442	1.9085	1.6499	2.0144	2.2592	2.0171	1.7669
GGGCAUCCG	2.538	2.0332	1.9946	2.4055	2.2448	1.5374	2.12558	2.47175	2.139	1.766
ACCUCGAGA	1.9343	2.0045	1.5878	2.3352	2.1597	1.9421	1.99393	2.13475	2.0821	1.76495
ACCUGGAGG	2.1879	2.0183	1.7685	2.2387	1.8962	1.7613	1.97848	2.2133	1.95725	1.7649
GUGCCCGAA	2.0527	2.1315	1.8225	2.209	1.8529	1.7071	1.96262	2.13085	1.9922	1.7648
CGCCCGGCC	2.0727	2.0227	1.8131	2.0912	1.9728	1.7158	1.94805	2.08195	1.99775	1.76445
GAGGAGCUG	2.4053	2.0408	1.7961	2.3737	1.9378	1.732	2.04762	2.3895	1.9893	1.76405
GGGUCCCAG	2.3082	2.2498	1.7729	1.8637	1.7686	1.7545	1.95295	2.08595	2.0092	1.7637
AGGCCCGGA	2.2529	2.0583	1.957	2.0408	2.0023	1.566	1.97955	2.14685	2.0303	1.7615
CACCCCUGA	1.9809	2.0118	1.7068	2.2633	2.1003	1.8143	1.97957	2.1221	2.05605	1.76055
GGAGCCGGG	2.2977	2.3935	1.9104	2.2135	2.3212	1.6106	2.12448	2.2556	2.35735	1.7605
CUCGCCCGG	2.0084	1.9926	1.9626	2.1366	1.8687	1.557	1.92098	2.0725	1.93065	1.7598
CGGGCACCC	2.2566	2.0193	1.7684	2.0777	1.7688	1.75	1.94013	2.16715	1.89405	1.7592
GUUCCUGGG	2.022	2.2135	1.8725	2.6699	1.9669	1.6434	2.0647	2.34595	2.0902	1.75795
CCUCGGUGG	2.1446	2.029	1.9598	2.3202	1.8529	1.5542	1.97678	2.2324	1.94095	1.757
CUCGGGGAU	2.1861	2.2662	1.7433	1.9207	2.3089	1.7689	2.03235	2.0534	2.28755	1.7561
UUGACCCGG	1.9263	2.0972	1.8622	2.2336	1.6693	1.6491	1.90628	2.07995	1.88325	1.75565
CUGGCCCGG	2.3861	2.2844	1.6588	2.0244	2.1313	1.8521	2.05618	2.20525	2.20785	1.75545
GCCCGGAAU	1.9903	1.9745	1.7327	2.2159	1.8609	1.7763	1.9251	2.1031	1.9177	1.7545
GAAUGGGUC	2.2778	2.1654	1.9623	2.0832	1.5895	1.5453	1.93725	2.1805	1.87745	1.7538
UGACACCAG	2.0207	2.1701	1.4594	2.2296	2.0247	2.0458	1.99172	2.12515	2.0974	1.7526
GAAGGCCCG	2.1802	2.2414	1.5453	2.0623	2.0136	1.9598	2.00043	2.12125	2.1275	1.75255
GGCGCUCGA	2.0178	2.2302	1.9201	2.1324	1.6792	1.5843	1.92733	2.0751	1.9547	1.7522
CUGGCCGGG	2.0178	2.1967	1.9405	2.1324	1.8425	1.5635	1.9489	2.0751	2.0196	1.752
GCACUUGGG	2.288	2.08	1.7961	1.9172	2.0742	1.7076	1.97718	2.1026	2.0771	1.75185
CGGGAACUG	2.2017	2.0923	1.7714	1.8786	2.106	1.7284	1.96307	2.04015	2.09915	1.7499
UCCGGUGAG	2.1579	2.1854	1.9783	2.0832	1.7289	1.5204	1.94235	2.12055	1.95715	1.74935
GGCGAGGCC	2.1145	2.2683	1.67	2.1454	1.8374	1.8283	1.97732	2.12995	2.05285	1.74915
GCUCGCCCG	2.227	2.0929	1.8216	2.4572	2.0886	1.6757	2.0605	2.3421	2.09075	1.74865
GACCGGGGG	2.2586	2.0212	1.8139	1.8868	1.9378	1.6832	1.93358	2.0727	1.9795	1.74855
GAAACCCGG	1.9825	2.3021	1.8507	2.2064	1.9987	1.6443	1.99745	2.09445	2.1504	1.7475
CCACCCCGG	2.0313	2.0584	1.8589	2.3009	1.8838	1.634	1.96122	2.1661	1.9711	1.74645
GACCCGAAA	1.9582	2.1382	1.7579	2.1988	1.9592	1.7341	1.95773	2.0785	2.0487	1.746
GCCCCCAGG	2.2049	1.8751	1.882	1.9607	1.8604	1.6097	1.8988	2.0828	1.86775	1.74585
UUGGCAUCC	2.1714	1.9829	1.6571	2.4673	1.86	1.8345	1.99553	2.31935	1.92145	1.7458
CCCGGGCAG	2.2231	2.1674	1.9851	2.1633	1.9722	1.5048	2.00265	2.1932	2.0698	1.74495
CCACCGGAG	2.0516	1.9397	1.7788	2.2476	2.1277	1.7107	1.97602	2.1496	2.0337	1.74475
CCGCCCGAU	1.988	2.0257	1.8307	2.1327	1.8554	1.6584	1.91515	2.06035	1.94055	1.74455
ACACCCGCC	2.0053	2.0699	1.7554	2.0885	2.0772	1.7328	1.95485	2.0469	2.07355	1.7441
GCGGCACCU	1.9517	1.9446	1.692	2.3091	1.7773	1.7958	1.91175	2.1304	1.86095	1.7439
GCCCGCUGG	2.3592	1.9615	1.7423	2.357	1.8067	1.744	1.99512	2.3581	1.8841	1.74315
CGGGGGAGA	2.3764	1.7475	1.5836	2.1078	1.7553	1.9008	1.9119	2.2421	1.7514	1.7422
GAGGCCCGU	2.0791	1.8892	1.7577	2.1916	1.8	1.7198	1.90623	2.13535	1.8446	1.73875
CUCGGCGGG	2.4367	2.1234	1.6328	2.0623	1.7302	1.8398	1.97087	2.2495	1.9268	1.7363
GGCCCGAAC	1.9818	1.9534	1.7125	2.1057	1.8885	1.7596	1.90025	2.04375	1.92095	1.73605
CCGCACCCG	2.0395	2.0885	1.7084	2.2341	1.8128	1.7624	1.94095	2.1368	1.95065	1.7354
UCGGGGUAG	1.9619	2.3412	1.8364	2.0904	1.9241	1.6316	1.96427	2.02615	2.13265	1.734
GGCACCCUA	2.0877	1.8446	1.8297	2.1046	2.3089	1.6379	1.9689	2.09615	2.07675	1.7338
GACCCGGCC	2.2227	2.0391	1.8593	2.1892	2.0507	1.6067	1.99462	2.20595	2.0449	1.733
CUGCCCGGA	2.1729	2.1553	1.8195	2.2232	2.0775	1.645	2.01557	2.19805	2.1164	1.73225
GAAGCCCGG	1.957	1.8234	1.7756	2.3016	2.1084	1.6869	1.94215	2.1293	1.9659	1.73125
CUCGGGAGA	2.2373	2.152	1.8916	1.9321	1.9804	1.5689	1.96038	2.0847	2.0662	1.73025
UCGGGGAAG	2.3219	1.5776	1.8916	2.4089	1.6541	1.5689	1.90383	2.3654	1.61585	1.73025
AUCCGAGGG	2.0169	2.2203	1.8204	2.4368	1.5678	1.6349	1.94952	2.22685	1.89405	1.72765
CGCCUGAGC	2.0144	1.9265	1.5666	2.0819	2.1949	1.8854	1.94495	2.04815	2.0607	1.726
CCCGAUGAA	2.02	2.1172	1.6803	2.0895	2.0859	1.7647	1.9596	2.05475	2.10155	1.7225
CUGCACCCG	1.9659	2.1292	1.6713	2.2072	1.9954	1.7693	1.95638	2.08655	2.0623	1.7203
UCCGAGAGC	1.9587	2.0583	1.6647	2.1978	2.0336	1.7757	1.94813	2.07825	2.04595	1.7202
ACCCGUGAA	1.9743	1.961	1.6143	2.2218	2.1296	1.8256	1.95443	2.09805	2.0453	1.71995
CCCCCGGAG	2.3327	2.1587	1.7685	1.8863	2.045	1.67	1.97687	2.1095	2.10185	1.71925
CUUGGGGUG	2.5066	1.8446	1.9756	2.0804	2.274	1.4592	2.0234	2.2935	2.0593	1.7174
GCAUCCGGG	2.1776	1.8026	1.7666	2.243	2.099	1.6677	1.95942	2.2103	1.9508	1.71715
UGAGGAGUG	2.0105	2.4594	1.8412	2.6222	2.3517	1.5924	2.14623	2.31635	2.40555	1.7168
CGGGGGGGU	2.3743	2.2545	1.9038	2.066	1.7816	1.5287	1.98482	2.22015	2.01805	1.71625
GGAGGGUCU	2.1868	2.5124	1.7293	2.4167	1.9462	1.7	2.0819	2.30175	2.2293	1.71465
UCCUUGAGG	1.9331	2.2054	1.7341	2.1143	1.952	1.6949	1.93897	2.0237	2.0787	1.7145
AGAUACCCG	1.9761	2.1643	1.7152	2.2694	2.1208	1.7122	1.993	2.12275	2.14255	1.7137
CUCGCGGGG	2.1776	2.7668	1.5766	1.8854	1.8367	1.8501	2.01553	2.0315	2.30175	1.71335
CAGACCCGA	1.9352	2.0336	1.7027	2.0966	1.8962	1.7234	1.89795	2.0159	1.9649	1.71305
CCGCCCUGG	1.9743	2.2923	1.7943	2.1802	1.8432	1.6252	1.95158	2.07725	2.06775	1.70975
CCUGGAUGC	2.0877	2.029	1.7976	2.2067	1.9974	1.6215	1.95665	2.1472	2.0132	1.70955
CGGAGAGAG	2.2863	1.7984	1.7691	2.0501	2.1807	1.6434	1.95467	2.1682	1.98955	1.70625
GAGGGUCGA	2.7056	2.0521	1.8597	2.5388	2.2769	1.5478	2.16348	2.6222	2.1645	1.70375
UCCGGCUGG	2.2334	2.0844	1.9391	1.9166	1.9754	1.4676	1.93608	2.075	2.0299	1.70335
GCCCGGUCC	2.3126	2.0528	1.7974	2.1839	2.0965	1.6027	2.00765	2.24825	2.07465	1.70005
CUGACACCU	2.0193	2.105	1.672	2.1707	1.7506	1.7265	1.90735	2.095	1.9278	1.69925
AUCCGGGAA	2.212	1.7482	1.497	2.3696	1.7614	1.8995	1.91462	2.2908	1.7548	1.69825
GAAGGUUCC	2.0268	2.2438	1.7355	2.1988	1.7614	1.6599	1.9377	2.1128	2.0026	1.6977
UCGGGGGUU	2.336	2.2545	1.6716	1.9071	2.2092	1.7198	2.01637	2.12155	2.23185	1.6957
CGAUGGGGG	2.068	2.0751	1.7855	2.3498	2.0157	1.597	1.98185	2.2089	2.0454	1.69125
CCGGUGAGU	2.2365	2.2545	1.3559	2.0024	1.9099	2.0128	1.962	2.11945	2.0822	1.68435
GAAUUUCGC	1.9655	1.7822	1.6624	2.2614	2.1148	1.7043	1.9151	2.11345	1.9485	1.68335
UAGGGGAGU	2.4876	2.446	1.6716	2.0522	1.6174	1.6949	1.99495	2.2699	2.0317	1.68325
CCCUCCGGG	2.2933	2.0042	1.5993	2.0079	1.9858	1.7639	1.9424	2.1506	1.995	1.6816
CACCCGAGU	1.9376	2.4179	1.6245	2.0875	2.3575	1.7353	2.02672	2.01255	2.3877	1.6799
GGCUGGAGG	2.4356	2.4594	1.588	2.1454	2.9076	1.758	2.21567	2.2905	2.6835	1.673
CGAGCCCGA	2.228	2.0998	1.6567	2.2604	1.9585	1.6891	1.98208	2.2442	2.02915	1.6729
CCGAGUUCU	1.9278	2.0947	1.6281	2.1818	2.1741	1.7101	1.95277	2.0548	2.1344	1.6691
GGAGUCUGG	2.3667	1.8753	1.9224	1.9071	2.1807	1.4141	1.94438	2.1369	2.028	1.66825
AGUGCCCGG	2.0346	2.1272	1.9298	2.0993	2.3586	1.3869	1.9894	2.06695	2.2429	1.65835
GUGCCCGGC	2.1879	2.0985	1.7685	2.2387	2.1565	1.5453	1.99923	2.2133	2.1275	1.6569
CACGCCCGG	2.0497	2.269	1.5908	2.1264	1.6801	1.7147	1.90512	2.08805	1.97455	1.65275
GCCGGGGAA	2.0085	1.9877	1.8595	2.4414	1.8799	1.4431	1.93668	2.22495	1.9338	1.6513
UGAGGGCCG	2.42	2.3744	1.6894	2.0085	1.5557	1.61	1.943	2.21425	1.96505	1.6497
UCGGGAGUU	1.9914	2.0154	1.81	2.3308	1.8529	1.4862	1.91445	2.1611	1.93415	1.6481
CCGAGGUUC	2.1993	2.4155	1.7114	2.3157	2.199	1.5833	2.0707	2.2575	2.30725	1.64735
CGUCCGGGG	2.2865	2.2045	1.4474	1.9885	1.7833	1.8456	1.92597	2.1375	1.9939	1.6465
UUGGAGGUG	2.1783	2.3979	2.006	2.0024	1.5906	1.2841	1.90988	2.09035	1.99425	1.64505
GAAUUCUGA	1.975	2.1347	1.5337	2.3624	1.816	1.752	1.92897	2.1687	1.97535	1.64285
GGUAGGGGA	2.3713	2.029	1.6716	2.4029	2.0524	1.6051	2.02205	2.3871	2.0407	1.63835
CUCGCCGGG	2.0329	2.2354	1.9328	2.2545	1.7828	1.3409	1.92988	2.1437	2.0091	1.63685
UGUCCGAGA	2.1254	1.737	1.6103	2.3361	1.9883	1.6625	1.90993	2.23075	1.86265	1.6364
GCCUUGAGA	2.2589	2.1709	1.6973	2.0684	2.0721	1.5699	1.97292	2.16365	2.1215	1.6336
CCGGAGAAG	2.204	2.0751	1.6056	2.2207	2.076	1.6595	1.97348	2.21235	2.07555	1.63255
GGCGGUGAG	2.3348	2.4098	1.6716	2.2146	2.4	1.5904	2.10353	2.2747	2.4049	1.631
UGGCGCUUG	2.0163	2.029	1.5307	2.4673	2.5976	1.7198	2.06012	2.2418	2.3133	1.62525
GGGUCUUCU	2.0442	2.2262	1.6852	2.1701	2.0789	1.5419	1.95775	2.10715	2.15255	1.61355
CCGGGGAAC	2.2163	2.1598	1.7563	2.2631	1.981	1.4513	1.9713	2.2397	2.0704	1.6038
UUGGGAUGG	2.3813	2.683	1.7856	2.3405	1.516	1.4071	2.01892	2.3609	2.0995	1.59635
CCGGUGGUC	1.9896	2.3267	1.698	2.308	1.895	1.4853	1.95043	2.1488	2.11085	1.59165
UUUUUUUUU	2.068	2.0574	1.7716	2.8606	1.2827	1.4111	1.90857	2.4643	1.67005	1.59135
CCCGAGAUG	1.9631	2.0651	1.5997	2.1454	2.1193	1.5703	1.91048	2.05425	2.0922	1.585
CCGGGAGAG	2.0004	2.2605	1.5861	2.2716	2.0373	1.4838	1.93995	2.136	2.1489	1.53495
GGGUGUCGG	2.5033	2.3785	1.9356	1.9572	2.0254	1.0258	1.97097	2.23025	2.20195	1.4807
GUCGGAAGG	2.2595	2.485	1.4395	2.1454	2.031	1.4332	1.9656	2.20245	2.258	1.43635

## Sheet: Pyoelii_IESI2
P_yoelii	Replicate_1			Replicate_2
9-mer	50_nM	100_nM	500_nM	50_nM	100_nM	500_nM	Average_50nM	Average_100nM	Average_500nM	Average_all
GCACUCGAG	3.4344	3.1945	4.0396	3.9912	3.9131	3.2134	3.7128	3.5538	3.6265	3.63103
GAUACCCGA	3.5891	3.7663	3.7325	3.8705	3.1695	2.7314	3.7298	3.4679	3.23195	3.47655
CACUCGAGA	3.6048	3.3032	3.4108	3.3103	3.2144	3.3281	3.45755	3.2588	3.36945	3.36193
GUGACACCC	3.3061	3.1977	3.9721	3.2036	2.7719	2.9094	3.25485	2.9848	3.44075	3.2268
CAUCCGAGG	3.448	3.1025	2.9442	3.3867	3.005	2.8232	3.41735	3.05375	2.8837	3.11827
CACCCGAGG	2.697	3.1064	3.5428	3.1565	2.9216	2.7113	2.92675	3.014	3.12705	3.0226
CACCUGAGA	2.8131	2.9367	3.3064	3.4735	2.7908	2.616	3.1433	2.86375	2.9612	2.98942
GUCACCCGG	3.1325	2.8292	3.3193	2.9552	2.7403	2.41	3.04385	2.78475	2.86465	2.89775
UGACAUCCG	2.9115	2.7843	3.1187	2.9822	2.5358	2.9044	2.94685	2.66005	3.01155	2.87282
GACACCUGG	2.9016	2.7012	3.1563	3.0724	3.0019	2.3466	2.987	2.85155	2.75145	2.86333
GUCCGAGAA	2.8964	2.993	2.624	2.9233	2.7524	2.9884	2.90985	2.8727	2.8062	2.86292
CCCGAGGGG	2.9422	2.7667	3.0714	2.7277	2.8225	2.8239	2.83495	2.7946	2.94765	2.85907
AUGCCCGGG	2.7428	3.2014	3.024	2.5417	2.7132	2.8563	2.64225	2.9573	2.94015	2.84657
ACACUCGAG	3.0393	2.7742	2.9677	3.035	2.6588	2.5837	3.03715	2.7165	2.7757	2.84312
CGGGAGGAG	2.9662	2.8613	2.7321	2.4757	2.8877	3.1241	2.72095	2.8745	2.9281	2.84118
ACCCGAGGG	2.6742	2.6337	3.273	2.813	2.8289	2.6862	2.7436	2.7313	2.9796	2.81817
CGCCCGAGU	2.913	2.5336	3.398	2.7659	2.6524	2.6316	2.83945	2.593	3.0148	2.81575
GACAUCCGA	2.716	2.7276	3.1314	2.4998	3.063	2.7235	2.6079	2.8953	2.92745	2.81022
GCUCGAGAA	2.7306	2.8213	2.4526	2.9114	2.8722	2.8385	2.821	2.84675	2.64555	2.7711
CCGAGGAUG	2.7266	2.8442	2.6664	2.9096	2.6163	2.859	2.8181	2.73025	2.7627	2.77035
CGGGAGGGG	2.7428	2.5932	2.7873	2.6292	2.564	3.2937	2.686	2.5786	3.0405	2.76837
ACCCGAGGA	2.646	3.0349	2.8321	3.1718	2.4317	2.4573	2.9089	2.7333	2.6447	2.7623
GGCACUCGA	2.9678	2.6181	3.0609	2.9022	2.6834	2.3276	2.935	2.65075	2.69425	2.76
GACCCGAGA	2.9041	2.59	2.7658	2.7786	2.7702	2.7408	2.84135	2.6801	2.7533	2.75825
GGCACCGAG	2.5769	3.2666	2.7762	2.7359	2.5433	2.6342	2.6564	2.90495	2.7052	2.75552
CUCGAGAGC	2.6795	2.535	2.8913	2.7423	2.9585	2.6881	2.7109	2.74675	2.7897	2.74912
CGCUCGAGA	3.0432	2.7527	2.8691	2.6101	2.7285	2.4292	2.82665	2.7406	2.64915	2.7388
CCACCCGAG	2.7677	2.8977	3.2378	2.4712	2.3904	2.6656	2.61945	2.64405	2.9517	2.7384
AACCCGAGA	2.9744	2.6532	2.7905	2.4757	2.7675	2.7671	2.72505	2.71035	2.7788	2.73807
ACACCCGGA	2.972	2.7899	2.9584	2.7934	2.382	2.482	2.8827	2.58595	2.7202	2.72962
GCCCGGGAA	2.9183	2.7877	2.7254	3.0302	2.5954	2.3136	2.97425	2.69155	2.5195	2.72843
ACCCGGGAG	2.9905	2.6489	2.7792	2.4725	2.2619	3.2134	2.7315	2.4554	2.9963	2.72773
UCGCACCCG	2.698	2.9658	2.9994	2.5282	2.5309	2.6396	2.6131	2.74835	2.8195	2.72698
CCCGGGAGA	2.6491	2.9384	2.9391	2.7607	2.2717	2.8019	2.7049	2.60505	2.8705	2.72682
CCACCCGGG	2.8729	2.8935	2.825	2.6435	2.3591	2.7641	2.7582	2.6263	2.79455	2.72635
GGCGCCCGC	2.9187	2.9255	3.028	2.4887	2.409	2.5465	2.7037	2.66725	2.78725	2.7194
GAGGCCCGA	2.7627	2.9664	2.9179	2.5441	2.702	2.41	2.6534	2.8342	2.66395	2.71718
CCCGAGGAA	3.0399	2.4311	2.8155	2.8037	2.4637	2.7448	2.9218	2.4474	2.78015	2.71645
UCGGGAUGG	2.633	2.7823	2.5903	2.6737	2.564	3.0527	2.65335	2.67315	2.8215	2.716
GCCCGGUGA	2.5682	2.9836	2.9819	2.7345	2.5688	2.4283	2.65135	2.7762	2.7051	2.71088
CUACCCGAG	2.8159	2.6412	2.8906	2.4955	2.6163	2.6778	2.6557	2.62875	2.7842	2.68955
GAGGAUGGA	2.3161	2.6412	2.6747	2.7232	2.8198	2.9456	2.51965	2.7305	2.81015	2.68677
GCACACCCG	2.794	3.0038	2.9431	2.4955	2.2605	2.56	2.64475	2.63215	2.75155	2.67615
CCGGGAAGA	2.7533	2.4934	2.4257	2.8794	2.7874	2.5182	2.81635	2.6404	2.47195	2.6429
GAGAGCCCG	2.8486	2.6633	2.5685	2.5174	2.7724	2.4805	2.683	2.71785	2.5245	2.64178
ACCCGGGGG	2.7266	2.6694	2.8155	2.6213	2.3085	2.6936	2.67395	2.48895	2.75455	2.63915
UGCGCCCGA	2.7829	2.6749	2.6369	2.6302	2.6419	2.4492	2.70655	2.6584	2.54305	2.636
GGUCAGGGG	2.7702	2.242	2.4495	2.6292	2.5902	3.133	2.6997	2.4161	2.79125	2.63568
ACCCCGGAG	2.7982	2.9258	2.8218	2.6837	2.4517	2.1302	2.74095	2.68875	2.476	2.63523
CCUGAGAAG	2.6001	2.6256	2.5227	3.048	2.5012	2.5064	2.82405	2.5634	2.51455	2.634
GGCACCCAC	2.7674	2.7559	2.8661	2.4935	2.5634	2.3469	2.63045	2.65965	2.6065	2.6322
CCGGAGGGG	2.8843	2.8406	2.4885	2.3862	2.7683	2.41	2.63525	2.80445	2.44925	2.62965
GCCUGAGAA	2.4517	2.613	2.4707	3.0557	2.6697	2.492	2.7537	2.64135	2.48135	2.62547
GGCACCCGC	2.777	2.6224	2.9211	2.4695	2.5618	2.3933	2.62325	2.5921	2.6572	2.62418
CAACCCGGG	2.7052	2.9972	2.5841	2.2708	2.5662	2.6081	2.488	2.7817	2.5961	2.62193
AGCCCGGGA	2.539	2.5932	2.5259	2.7501	2.8705	2.433	2.64455	2.73185	2.47945	2.61862
GCCCGGGAC	2.7656	2.7913	2.8155	2.2281	2.5291	2.5774	2.49685	2.6602	2.69645	2.61783
GCCCGGGCC	2.8396	2.6933	2.6333	2.6868	2.3624	2.4809	2.7632	2.52785	2.5571	2.61605
CCCGGGUUC	2.8342	3.2415	3.1283	2.5994	1.9332	1.9414	2.7168	2.58735	2.53485	2.613
UACCCGGGA	2.51	2.5375	2.7984	2.9438	2.2833	2.6048	2.7269	2.4104	2.7016	2.61297
GAUACCCGG	2.9836	2.5299	2.6507	3.1085	2.4249	1.979	3.04605	2.4774	2.31485	2.61277
GCGCCCGAA	2.317	3.2173	2.6642	2.5939	2.4679	2.398	2.45545	2.8426	2.5311	2.60972
GGGGGCCCG	2.9202	2.59	2.8155	2.3854	2.247	2.6936	2.6528	2.4185	2.75455	2.60862
GGACCCGAG	2.6491	2.7671	2.7606	2.7607	2.4759	2.2337	2.7049	2.6215	2.49715	2.60785
CCUGGGAGA	2.7677	3.0082	2.6491	2.7952	2.545	1.8806	2.78145	2.7766	2.26485	2.60763
UUGGCACCU	2.4136	2.5283	2.9056	2.8163	2.3861	2.5707	2.61495	2.4572	2.73815	2.60343
UGACACCCA	2.5371	2.2092	2.8255	2.5623	2.7004	2.6539	2.5497	2.4548	2.7397	2.5814
UGGCACCCA	2.5897	2.4751	2.8548	2.5286	2.6285	2.41	2.55915	2.5518	2.6324	2.58112
CGCCCGAGC	2.7006	2.7843	2.9454	2.5195	2.5459	1.9775	2.61005	2.6651	2.46145	2.57887
GCACCCGGG	2.8342	2.3861	3.0501	2.4138	2.2893	2.477	2.624	2.3377	2.76355	2.57508
CACCCGGAA	2.9789	2.6787	2.839	2.4757	2.2457	2.2315	2.7273	2.4622	2.53525	2.57492
AGGCACCCC	2.9708	2.6223	2.942	2.3232	2.3165	2.2746	2.647	2.4694	2.6083	2.5749
AGGCACCUG	2.6221	2.7769	2.9957	2.5489	2.3547	2.1369	2.5855	2.5658	2.5663	2.57253
GACCCGGGG	2.7561	2.7276	2.7606	2.3911	2.31	2.4884	2.5736	2.5188	2.6245	2.5723
AGACACCCG	2.4768	2.7176	2.8496	2.4577	2.2992	2.6291	2.46725	2.5084	2.73935	2.57167
CAGCACCCG	2.7352	2.8048	2.8078	2.4051	2.4873	2.1789	2.57015	2.64605	2.49335	2.56985
GGGAGAGAG	2.3666	2.1764	2.365	2.7246	2.8854	2.892	2.5456	2.5309	2.6285	2.56833
GCCACCCGG	2.6909	2.8472	2.7318	2.5533	2.1001	2.486	2.6221	2.47365	2.6089	2.56822
GCCCGGAGA	2.691	2.9459	2.688	2.371	2.251	2.4555	2.531	2.59845	2.57175	2.56707
UGGGGCUGG	2.5713	2.3298	2.5339	2.5066	2.9434	2.5105	2.53895	2.6366	2.5222	2.56592
UGAUACCCG	2.5713	2.7181	2.9211	2.3674	2.4692	2.3347	2.46935	2.59365	2.6279	2.56363
GCCCGAGGC	2.4799	2.6224	2.8976	2.7108	2.3111	2.3598	2.59535	2.46675	2.6287	2.5636
AGGCGCCCG	2.3856	2.7892	2.5405	2.653	2.0566	2.9518	2.5193	2.4229	2.74615	2.56278
GGCUCGAGA	2.4749	2.6761	2.5929	2.6737	2.592	2.354	2.5743	2.63405	2.47345	2.5606
CCCCCGGGG	2.6916	2.8957	2.6278	2.3766	2.2326	2.5386	2.5341	2.56415	2.5832	2.56048
CGGCCCGGG	2.6831	2.8187	2.3503	2.3831	2.4912	2.6021	2.5331	2.65495	2.4762	2.55475
CGACCCGAG	2.5762	2.7688	2.4636	2.6896	2.4108	2.41	2.6329	2.5898	2.4368	2.55317
AGACCCCGG	2.5943	2.6313	2.9612	2.4011	2.2162	2.514	2.4977	2.42375	2.7376	2.55302
GAGCCCGGG	2.4907	2.6574	2.9068	2.7219	2.6305	1.9107	2.6063	2.64395	2.40875	2.553
GGCACCUGG	2.5204	2.8618	2.8459	2.5292	2.0082	2.5403	2.5248	2.435	2.6931	2.55097
AGGGGGGGG	2.152	2.4519	2.0358	3.0851	2.6566	2.9044	2.61855	2.55425	2.4701	2.54763
CUGGCACCC	2.4624	2.185	3.1033	2.5747	2.4419	2.5171	2.51855	2.31345	2.8102	2.5474
GCGCCUGAG	2.6818	2.8513	2.8155	2.3271	2.2384	2.3654	2.50445	2.54485	2.59045	2.54658
UGACACCCC	2.8164	2.4996	3.1265	2.2747	2.3352	2.2062	2.54555	2.4174	2.66635	2.5431
GGCGCCCGA	2.8465	2.6136	2.5111	2.746	2.2345	2.3015	2.79625	2.42405	2.4063	2.5422
GGUCGCGGG	2.6644	2.6755	2.2792	2.504	2.5167	2.6013	2.5842	2.5961	2.44025	2.54018
CCACCUGAG	2.4008	2.4767	2.5669	2.9747	2.5144	2.3057	2.68775	2.49555	2.4363	2.53987
CCCCCGAGA	2.6775	2.8106	2.8825	2.4085	2.0868	2.3718	2.543	2.4487	2.62715	2.53962
GAGAUGCCC	2.5127	2.6489	2.4613	2.4725	2.5995	2.5266	2.4926	2.6242	2.49395	2.53692
CCCGAGCGU	2.3397	2.6681	2.8155	2.4009	2.3387	2.656	2.3703	2.5034	2.73575	2.53648
GCACCUGAG	2.6209	2.7312	2.8781	2.5004	2.4128	2.0753	2.56065	2.572	2.4767	2.53645
GCAUCCGAG	2.3717	2.5582	2.8486	2.5426	2.5548	2.3155	2.45715	2.5565	2.58205	2.5319
GACCCGAGC	2.7346	2.6448	2.7987	2.687	2.2805	2.0383	2.7108	2.46265	2.4185	2.53065
CAUCCCGGG	2.8603	3.0099	2.3932	2.3077	2.3173	2.2953	2.584	2.6636	2.34425	2.53062
AACCCGGGG	2.8305	2.7877	2.579	2.1924	2.3338	2.4582	2.51145	2.56075	2.5186	2.53027
AAGCCCGAG	2.6513	2.3298	2.6513	2.4695	2.5073	2.5607	2.5604	2.41855	2.606	2.52832
ACCCCCGGG	2.6611	2.8966	2.7556	2.3988	2.132	2.3246	2.52995	2.5143	2.5401	2.52812
GACAUCCGG	2.6584	2.4796	2.6134	2.468	2.5358	2.41	2.5632	2.5077	2.5117	2.52753
AGCCCGAGU	2.7861	2.2889	2.7118	2.6737	2.3272	2.3678	2.7299	2.30805	2.5398	2.52592
GCUGGCUCG	2.7584	2.6549	2.542	2.6737	2.2426	2.2494	2.71605	2.44875	2.3957	2.52017
GCUCGAGAG	2.1509	2.6728	2.5191	2.6034	2.5475	2.6214	2.37715	2.61015	2.57025	2.51918
GCUCGGGUG	2.4685	2.6787	2.3462	2.6737	2.7035	2.2427	2.5711	2.6911	2.29445	2.51888
GCCCGGGGC	2.5942	2.6337	2.6395	2.5066	2.3656	2.3598	2.5504	2.49965	2.49965	2.51657
GGACGCCGG	2.5639	2.666	2.6931	2.4606	2.2182	2.4974	2.51225	2.4421	2.59525	2.51653
GGGGGCGGU	2.8211	2.5083	2.5742	2.2281	2.0931	2.8691	2.5246	2.3007	2.72165	2.51565
GCCUGGGGA	2.3358	2.283	2.4704	2.99	2.4475	2.5655	2.6629	2.36525	2.51795	2.51537
CGAUGCCCG	2.666	2.4311	2.838	2.6202	2.5849	1.9441	2.6431	2.508	2.39105	2.51405
GAACCCGAG	2.7322	2.6493	2.7397	2.0396	2.556	2.3482	2.3859	2.60265	2.54395	2.51083
GGAGGGGGG	2.4502	2.197	1.877	3.565	2.0233	2.9456	3.0076	2.11015	2.4113	2.50968
ACACCCGCG	2.715	2.414	2.7371	2.4819	2.3249	2.3795	2.59845	2.36945	2.5583	2.50873
GACACCCCG	2.4544	2.4103	3.1837	2.2852	2.4822	2.2349	2.3698	2.44625	2.7093	2.50845
CCGCCCGAG	2.9115	2.6181	3.0646	2.2452	2.1937	2.0084	2.57835	2.4059	2.5365	2.50692
CCCGAGUUU	2.684	2.6433	2.9362	2.1326	2.635	2.0084	2.4083	2.63915	2.4723	2.50658
CGCGAGAGA	2.5202	2.7873	2.6033	2.1441	2.5405	2.4333	2.33215	2.6639	2.5183	2.50478
UCUGUUGGG	2.0974	2.8283	2.2855	2.831	2.524	2.4573	2.4642	2.67615	2.3714	2.50392
CGCCCGAAA	2.5515	2.7508	2.4229	2.5756	2.3475	2.3658	2.56355	2.54915	2.39435	2.50235
ACCUGAGGG	2.4311	2.5907	2.5083	2.5522	2.2833	2.6474	2.49165	2.437	2.57785	2.50217
CCCCGGGAG	2.9123	2.4557	2.7848	2.5279	1.9979	2.3224	2.7201	2.2268	2.5536	2.50017
CGCCCCGAG	2.6909	2.7012	2.6176	2.4449	2.1991	2.334	2.5679	2.45015	2.4758	2.49795
GCCCGGGUA	2.9713	2.8513	2.6591	2.3766	2.064	2.053	2.67395	2.45765	2.35605	2.49588
CGUCCGAGA	2.6009	2.6453	2.5534	2.3049	2.3186	2.5485	2.4529	2.48195	2.55095	2.49527
GGUACCCGA	2.6584	2.7012	2.6964	2.5366	2.2742	2.1011	2.5975	2.4877	2.39875	2.49465
CGGUGAGUG	2.4786	3.0414	2.2941	2.4096	2.1318	2.5886	2.4441	2.5866	2.44135	2.49068
ACGCCCGGG	2.588	2.438	2.7144	2.6966	2.2541	2.2452	2.6423	2.34605	2.4798	2.48938
CGGCGCCCG	2.732	2.6271	2.7161	2.2543	2.2777	2.3155	2.49315	2.4524	2.5158	2.48712
AGAUGCCCG	2.3983	2.5505	2.6976	2.3214	2.6163	2.3353	2.35985	2.5834	2.51645	2.48657
CCCGGGUUU	2.5536	2.6081	3.0097	2.3357	2.5442	1.856	2.44465	2.57615	2.43285	2.48455
GGCCCCGAG	2.5338	2.8041	2.7753	2.313	1.8937	2.5822	2.4234	2.3489	2.67875	2.48368
GGUCCGAGA	2.3771	2.4731	2.5527	2.7925	2.3373	2.3565	2.5848	2.4052	2.4546	2.48153
UCCCGGGGA	2.8294	2.8434	2.3117	2.3454	2.5199	2.0295	2.5874	2.68165	2.1706	2.47988
CGGAGGAAG	2.556	2.4598	2.48	2.3893	2.2712	2.7177	2.47265	2.3655	2.59885	2.479
GGGUGGCAC	2.3937	2.3738	2.5425	2.3496	2.4736	2.7265	2.37165	2.4237	2.6345	2.47662
ACCCCGGGG	2.6482	2.4684	2.7475	2.5354	2.4179	2.0361	2.5918	2.44315	2.3918	2.47558
GGACACCCG	2.6759	2.4772	2.6232	2.3694	2.1952	2.508	2.52265	2.3362	2.5656	2.47482
CCCUGGGAG	2.5443	2.8277	2.5998	2.4651	2.6831	1.7263	2.5047	2.7554	2.16305	2.47438
CUGCGCCCG	2.7232	2.7688	2.4837	2.6419	2.1772	2.0514	2.68255	2.473	2.26755	2.47437
CCCCGAGAA	2.8047	2.3788	2.6429	2.1706	1.9327	2.9154	2.48765	2.15575	2.77915	2.47418
GGCCACCCG	2.4846	2.5296	2.6234	2.6423	2.21	2.3439	2.56345	2.3698	2.48365	2.4723
AUGGGAAGG	2.3819	2.6159	2.3117	2.3454	2.6163	2.558	2.36365	2.6161	2.43485	2.47153
GACCCCGAG	2.5682	2.3943	2.8283	2.4104	2.4142	2.2092	2.4893	2.40425	2.51875	2.47077
ACCUGAGAG	2.6615	2.221	2.4297	2.9378	2.4516	2.1125	2.79965	2.3363	2.2711	2.46902
GGCCCGAGA	2.8924	2.7176	2.5595	2.5657	2.2041	1.8745	2.72905	2.46085	2.217	2.46897
AACCCGAGG	2.8377	2.4415	2.7072	2.6052	2.244	1.9775	2.72145	2.34275	2.34235	2.46885
UCGCCCGGG	2.646	2.6377	2.7989	2.3592	2.0469	2.3155	2.5026	2.3423	2.5572	2.46737
CACCCGGGU	2.492	2.5314	2.735	2.6228	2.0482	2.3412	2.5574	2.2898	2.5381	2.46177
CCGGCCGAG	2.6935	2.632	2.5412	2.171	2.4218	2.307	2.43225	2.5269	2.4241	2.46108
ACCCGGGGC	2.5732	2.5441	2.4776	2.6737	2.0836	2.41	2.62345	2.31385	2.4438	2.46037
UGCCCCGAG	2.7428	2.4419	2.6015	2.4776	2.4489	2.0244	2.6102	2.4454	2.31295	2.45618
GCCCGGGAU	2.4786	2.261	2.7321	2.1786	2.6163	2.4695	2.3286	2.43865	2.6008	2.45602
CGAGGAUGG	2.6487	2.4543	2.6224	2.139	2.5117	2.3412	2.39385	2.483	2.4818	2.45288
GACACCCUG	2.4783	2.3153	2.9462	2.3872	2.1398	2.4387	2.43275	2.22755	2.69245	2.45092
CCCCGAGAC	2.6362	2.7274	2.6405	2.3449	2.149	2.2072	2.49055	2.4382	2.42385	2.45087
CGAGCCCGG	2.6269	2.6403	2.5855	2.4352	2.3658	2.048	2.53105	2.50305	2.31675	2.45028
CACCUGAGG	2.4228	2.3973	2.5457	2.9708	2.3111	2.0418	2.6968	2.3542	2.29375	2.44825
GCCCUGGGA	2.697	2.5211	2.487	2.5994	2.1912	2.1925	2.6482	2.35615	2.33975	2.44803
CGGGAGAAG	2.3492	2.6542	2.0443	2.48	2.6618	2.4974	2.4146	2.658	2.27085	2.44782
AGUCACCCG	2.8152	2.2935	2.3799	2.6065	2.2905	2.2888	2.71085	2.292	2.33435	2.44573
CCCGGGUGC	2.901	2.8259	2.5231	2.0396	2.1736	2.2092	2.4703	2.49975	2.36615	2.4454
CCCGGGACC	2.6726	2.5756	2.6453	2.2385	2.1661	2.3727	2.45555	2.37085	2.509	2.44513
CACCCGGUU	2.5233	2.3339	2.6916	2.6737	2.0093	2.4261	2.5985	2.1716	2.55885	2.44298
GAGACCCGG	2.4221	2.4103	2.5816	2.564	2.2943	2.3853	2.49305	2.3523	2.48345	2.44293
CAGCCGGGA	2.5304	2.6751	2.4976	2.4868	2.1015	2.3582	2.5086	2.3883	2.4279	2.4416
UCACCCGGU	2.5922	2.3093	2.694	2.3592	2.1751	2.5045	2.4757	2.2422	2.59925	2.43905
UGCUGCGGG	2.6795	2.1818	2.6855	2.1253	2.3346	2.6263	2.4024	2.2582	2.6559	2.43883
CGAUACCCG	2.3523	2.5547	2.6819	2.6586	2.1374	2.2466	2.50545	2.34605	2.46425	2.43858
ACACCUGAG	2.617	2.4424	2.2407	2.878	2.2239	2.2259	2.7475	2.33315	2.2333	2.43798
UGGCACCUG	2.4342	2.8025	2.6219	2.3952	2.3874	1.9833	2.4147	2.59495	2.3026	2.43742
CCCGGGGGC	2.7318	2.6148	2.7141	2.2103	2.1035	2.2494	2.47105	2.35915	2.48175	2.43732
GGAAGGUUG	2.4023	2.5149	2.3883	2.3664	2.5261	2.41	2.38435	2.5205	2.39915	2.43467
GAUCCCGAG	2.586	2.5799	2.5167	2.2372	2.4562	2.2297	2.4116	2.51805	2.3732	2.43428
GGGCGCCCG	3.017	2.6159	2.7266	2.1108	2.2308	1.9027	2.5639	2.42335	2.31465	2.43397
GGGGCCCCC	2.8995	2.5919	2.4401	2.3024	2.1678	2.1901	2.60095	2.37985	2.3151	2.43197
GGCACUCGG	2.2265	2.6694	2.6168	2.464	2.7241	1.8902	2.34525	2.69675	2.2535	2.43183
CACCCUGGG	2.4596	2.8319	2.4976	2.3575	2.4138	2.0213	2.40855	2.62285	2.25945	2.43028
AAGACACCC	2.4177	2.2877	2.5096	2.5417	2.3063	2.5092	2.4797	2.297	2.5094	2.4287
GGUCGGUCG	2.4685	2.242	2.0272	2.4955	2.564	2.7715	2.482	2.403	2.39935	2.42812
GACCCCGGU	2.6199	2.6528	2.4877	2.2347	2.2336	2.3381	2.4273	2.4432	2.4129	2.4278
CCUGGGGUU	2.5828	2.4761	2.7216	2.2652	2.1585	2.3431	2.424	2.3173	2.53235	2.42455
GGGGGGCCG	2.5371	2.6112	2.4401	2.488	2.2239	2.2427	2.51255	2.41755	2.3414	2.42383
GGGUACCCG	2.3771	2.5932	2.5777	2.4361	2.4303	2.1244	2.4066	2.51175	2.35105	2.42313
UACCCGAGA	2.776	2.3738	2.6107	2.1336	2.3309	2.3127	2.4548	2.35235	2.4617	2.42295
AACACCCGG	2.4468	2.5591	2.5636	2.4275	2.2996	2.2303	2.43715	2.42935	2.39695	2.42115
ACCCGAGAC	2.4934	2.102	2.6517	2.4306	2.3499	2.4977	2.462	2.22595	2.5747	2.42088
CGACCCCGG	2.5617	2.4959	2.5903	2.5311	2.2396	2.1048	2.5464	2.36775	2.34755	2.42057
CCCGGCGAG	2.7287	2.4519	2.4473	2.2967	2.2809	2.3173	2.5127	2.3664	2.3823	2.42047
GCGCGAGAG	2.3986	2.733	2.1751	2.4291	2.5137	2.2683	2.41385	2.62335	2.2217	2.41963
GAGGGUUCU	2.3542	2.6562	2.3462	2.5252	2.1367	2.477	2.4397	2.39645	2.4116	2.41592
GCCCGAGUA	2.1781	2.161	2.9811	2.3592	2.4932	2.3155	2.26865	2.3271	2.6483	2.41468
CCCGAGCCC	2.5787	2.7659	2.6567	2.2852	2.263	1.9294	2.43195	2.51445	2.29305	2.41315
UGGCACCCU	1.9885	1.9753	3.273	2.1724	2.3547	2.7113	2.08045	2.165	2.99215	2.41253
GACACCCAA	2.471	2.1853	2.5568	2.2883	2.4136	2.5475	2.37965	2.29945	2.55215	2.41042
ACAUCCGAG	2.4136	2.4731	2.2774	2.5945	2.3373	2.3565	2.50405	2.4052	2.31695	2.40873
CGGGGGGGC	2.5233	2.3771	2.0497	2.745	2.114	2.635	2.63415	2.24555	2.34235	2.40735
GCCCGAGAC	2.666	2.6256	2.7592	2.3707	2.1245	1.8959	2.51835	2.37505	2.32755	2.40698
AUGACGCCC	2.3999	2.3153	2.5943	2.435	2.4295	2.2666	2.41745	2.3724	2.43045	2.40677
CCUUCGGGG	2.3771	2.5061	2.4088	2.9708	2.253	1.9191	2.67395	2.37955	2.16395	2.40582
GCAGGUGGG	2.5997	2.5838	2.4972	2.17	2.2751	2.3053	2.38485	2.42945	2.40125	2.40518
CGAGGCACC	2.529	2.5398	2.4937	2.5001	2.161	2.2014	2.51455	2.3504	2.34755	2.40417
UGUUCUGGG	2.6605	2.5391	2.5903	2.0498	2.1716	2.41	2.35515	2.35535	2.50015	2.40355
CCCCCGAGC	2.7116	2.6131	2.6078	2.2186	2.145	2.1195	2.4651	2.37905	2.36365	2.4026
GCCCAGAGA	2.5422	2.556	2.3674	2.6258	2.2506	2.0731	2.584	2.4033	2.22025	2.40252
AUGGCACCC	2.3725	2.269	2.8296	2.2727	2.4594	2.2092	2.3226	2.3642	2.5194	2.40207
CCCCGAGUG	2.6644	2.3925	2.6647	2.2122	2.2519	2.2235	2.4383	2.3222	2.4441	2.40153
CGAUGCUCG	2.3015	2.4546	2.6319	2.4993	2.1044	2.41	2.4004	2.2795	2.52095	2.40028
CGGGGUUUC	2.6818	2.3811	2.5861	2.1126	2.6745	1.9637	2.3972	2.5278	2.2749	2.39997
CUGGGGGGU	1.9016	2.3411	2.5903	2.4361	2.5466	2.5707	2.16885	2.44385	2.5805	2.39773
GAUGCCCGA	2.2083	2.4103	2.5556	2.6737	2.6163	1.9157	2.441	2.5133	2.23565	2.39665
GGCCUGAGA	2.3174	2.6681	2.4133	2.4736	2.2426	2.2625	2.3955	2.45535	2.3379	2.39625
AGAGGGGUG	2.3612	2.3019	2.13	2.7512	2.4571	2.3751	2.5562	2.3795	2.25255	2.39608
GCCCGGGCU	2.8256	2.4158	2.4755	2.1692	2.4287	2.0614	2.4974	2.42225	2.26845	2.39603
ACCCGAGUC	2.5256	2.6112	2.8155	2.0796	2.0495	2.2929	2.3026	2.33035	2.5542	2.39572
GUGGAGGGG	2.4201	2.2563	2.2524	2.6213	2.5548	2.2683	2.5207	2.40555	2.26035	2.39553
CACCUGGGA	2.5111	2.5331	2.34	2.7331	2.1628	2.0887	2.6221	2.34795	2.21435	2.3948
GCCGCCCGG	2.4837	2.7688	2.7451	2.1414	2.0277	2.198	2.31255	2.39825	2.47155	2.39412
CACCGGAGG	2.5164	2.4697	2.6278	2.2918	2.3672	2.0912	2.4041	2.41845	2.3595	2.39402
GGCACCCCA	2.5244	2.3311	2.6643	2.3189	2.1803	2.3282	2.42165	2.2557	2.49625	2.3912
CGGUGUCGG	2.7689	2.444	2.5742	2.2069	2.0931	2.257	2.4879	2.26855	2.4156	2.39068
GGGACCCGG	2.2265	2.5	2.4291	2.5164	2.288	2.3785	2.37145	2.394	2.4038	2.38975
GUGGGAGAG	2.1256	2.116	1.8301	3.0822	2.3329	2.8452	2.6039	2.22445	2.33765	2.38867
CCCGGGGUC	2.6407	2.3494	2.6714	2.3628	2.0079	2.2979	2.50175	2.17865	2.48465	2.38835
GGUCGCUCG	2.2131	2.5522	2.1941	2.8274	2.2374	2.2992	2.52025	2.3948	2.24665	2.38723
AUGGGGGCG	2.7926	2.0627	2.6107	2.4712	2.0455	2.337	2.6319	2.0541	2.47385	2.38662
CCGCGGGAU	2.5189	2.5689	2.3903	2.1644	2.1999	2.4756	2.34165	2.3844	2.43295	2.38633
GAAGCCCGA	2.4186	2.4925	2.4508	2.4914	2.2239	2.2366	2.455	2.3582	2.3437	2.38563
GCUUGGCGG	2.5077	2.5083	2.1116	2.3554	2.4481	2.3813	2.43155	2.4782	2.24645	2.3854
CCACCCGAC	2.5208	2.4327	2.4672	2.5758	2.0023	2.3032	2.5483	2.2175	2.3852	2.38367
GGGAGGUUU	2.3386	2.9287	2.1931	2.0639	2.4511	2.3255	2.20125	2.6899	2.2593	2.38348
CCCGAGGGC	2.5196	2.2525	2.6723	2.2508	2.1818	2.4237	2.3852	2.21715	2.548	2.38345
CGACCCCGA	2.4521	2.5073	2.4834	2.5214	2.2585	2.0736	2.48675	2.3829	2.2785	2.38272
GGAUGGGGG	2.0479	2.5932	2.4026	2.4955	2.721	2.0351	2.2717	2.6571	2.21885	2.38255
CAUCCGGGA	2.36	2.5881	2.5798	2.0934	2.2999	2.3727	2.2267	2.444	2.47625	2.38232
CCCCCGGGA	2.7489	2.4888	2.4991	2.2431	2.0519	2.2566	2.496	2.27035	2.37785	2.3814
UGCCCGGGC	2.3524	2.5038	2.3823	2.4509	2.4352	2.1629	2.40165	2.4695	2.2726	2.38125
CGGAAAAGG	2.3653	2.4689	2.2645	2.4725	2.3969	2.315	2.4189	2.4329	2.28975	2.38052
GAAACCCGA	2.6389	2.5825	2.3761	2.2754	2.1565	2.2518	2.45715	2.3695	2.31395	2.3802
CCCCGGGAC	2.6082	2.7471	2.3427	2.1776	2.2264	2.1675	2.3929	2.48675	2.2551	2.37825
GGCGGCGGG	2.2161	2.6148	2.5002	2.4955	2.3861	2.0566	2.3558	2.50045	2.2784	2.37822
CCCCGGGGA	2.762	2.6728	2.2524	2.2203	2.2032	2.1563	2.49115	2.438	2.20435	2.37783
GGGCACCGG	2.666	2.5175	2.579	2.2103	2.3652	1.928	2.43815	2.44135	2.2535	2.37767
UGGGGACCC	2.5318	2.2753	2.6747	2.1938	2.5157	2.0702	2.3628	2.3955	2.37245	2.37692
GGGAAGGAU	2.398	2.5314	2.0111	2.3936	2.422	2.5018	2.3958	2.4767	2.25645	2.37632
CCCCGCCCG	2.6694	2.5498	2.5573	2.2025	2.0631	2.2156	2.43595	2.30645	2.38645	2.37628
CCGAAGAGA	2.3819	2.2842	2.2326	2.6424	2.3731	2.3396	2.51215	2.32865	2.2861	2.37563
AAGCACCCG	2.4868	2.1682	2.4701	2.5192	2.2256	2.3672	2.503	2.1969	2.41865	2.37285
CUGGGGGUG	2.4075	2.251	2.2211	2.5252	2.3256	2.4993	2.46635	2.2883	2.3602	2.37162
CCCCGAGGG	2.5233	2.5599	2.4863	2.2212	2.1575	2.2741	2.37225	2.3587	2.3802	2.37038
GACGCCGGG	2.5256	2.6675	2.4636	2.5066	1.8641	2.1925	2.5161	2.2658	2.32805	2.36998
UGAGGGUCG	2.2181	2.3489	2.3258	2.635	2.5936	2.0957	2.42655	2.47125	2.21075	2.36952
GGGUUGGGG	2.4685	2.4761	2.3462	2.3766	2.1367	2.41	2.42255	2.3064	2.3781	2.36902
GCACCCGAA	2.4728	2.2124	2.6725	2.4332	2.3921	2.0275	2.453	2.30225	2.35	2.36842
GAGGGUUCC	2.5599	3.0814	2.2524	2.3766	2.2675	1.6662	2.46825	2.67445	1.9593	2.36733
GGCCGUGGG	2.5193	2.7012	2.4609	2.3106	2.0349	2.172	2.41495	2.36805	2.31645	2.36648
CCAUCCGAG	2.2422	2.6269	2.4424	2.5734	2.2631	2.0485	2.4078	2.445	2.24545	2.36608
CCUGGGGAG	2.3272	2.4065	2.1329	2.7547	2.3468	2.2153	2.54095	2.37665	2.1741	2.3639
GCGCUCGAG	2.2832	2.6136	2.5416	2.3124	2.1072	2.3232	2.2978	2.3604	2.4324	2.36353
GGUUCCGGG	2.26	2.7012	2.3425	2.3529	2.5535	1.9602	2.30645	2.62735	2.15135	2.36172
CCGGGUGGG	2.0799	2.0934	2.7686	2.3395	2.4419	2.4435	2.2097	2.26765	2.60605	2.36113
CCGAGAAAA	2.361	2.3425	2.3875	2.4456	2.3024	2.3201	2.4033	2.32245	2.3538	2.35985
CCUGAGAGA	2.2507	2.3437	2.36	2.4247	2.6856	2.0911	2.3377	2.51465	2.22555	2.3593
CCGAGCCCG	2.5727	2.631	2.4044	2.2459	2.1873	2.1128	2.4093	2.40915	2.2586	2.35902
CCCGAGACG	2.3717	2.4629	2.3932	2.4902	2.3085	2.1265	2.43095	2.3857	2.25985	2.35883
ACCCCCGAG	2.4632	2.4051	2.8642	2.3052	2.0578	2.0315	2.3842	2.23145	2.44785	2.3545
CCCCCCGGG	2.6638	2.6235	2.5083	2.2213	1.9266	2.1727	2.44255	2.27505	2.3405	2.3527
CGGCUCGAG	2.239	2.2823	2.3903	2.4191	2.4241	2.3609	2.32905	2.3532	2.3756	2.35262
UGACCCCGA	2.1707	2.3539	2.6546	2.4827	2.3547	2.0887	2.3267	2.3543	2.37165	2.35088
GGGAGUUUC	2.3542	2.4536	2.2055	2.6737	1.8968	2.5105	2.51395	2.1752	2.358	2.34905
GCUCUGAGA	2.3244	2.454	2.3287	2.3716	2.3503	2.2603	2.348	2.40215	2.2945	2.34822
GAGACACCC	2.3971	2.198	2.4915	2.7592	2.1647	2.0579	2.57815	2.18135	2.2747	2.34473
ACUCGAGAA	2.3694	2.236	2.3775	2.5128	2.3184	2.2538	2.4411	2.2772	2.31565	2.34465
CUGGCCCGA	2.2235	2.3122	2.5302	2.6143	2.1977	2.1851	2.4189	2.25495	2.35765	2.34383
CACCCGAAA	2.4431	2.4061	2.5126	2.464	2.2206	2.005	2.45355	2.31335	2.2588	2.3419
CGGCACCGG	2.3896	2.6568	2.4067	2.1854	2.3081	2.1019	2.2875	2.48245	2.2543	2.34142
UCCCGGGAG	2.5458	2.7566	2.3535	2.2395	2.026	2.1217	2.39265	2.3913	2.2376	2.34052
CGCGAGGAG	2.3771	2.2398	2.4636	2.1353	2.5073	2.3096	2.2562	2.37355	2.3866	2.33878
ACCCCGGGA	2.4808	2.4513	2.5718	2.3811	2.0462	2.0983	2.43095	2.24875	2.33505	2.33825
UGCCCGAGC	2.5565	2.3445	2.5711	2.0852	2.2115	2.2585	2.32085	2.278	2.4148	2.33788
CCCGAGAAC	2.6482	2.338	2.631	2.2127	2.0299	2.1607	2.43045	2.18395	2.39585	2.33675
CGUGCCGGG	2.4083	2.5167	2.2524	2.4998	2.1058	2.2337	2.45405	2.31125	2.24305	2.33612
CCCGGGCGG	2.3928	2.3938	2.3398	2.4279	2.1652	2.2854	2.41035	2.2795	2.3126	2.33415
AAACCCGAG	2.4136	2.3267	2.2599	2.4123	2.1907	2.3993	2.41295	2.2587	2.3296	2.33375
CCCGAGAGC	2.4904	2.5283	2.2974	2.3885	2.0407	2.2494	2.43945	2.2845	2.2734	2.33245
CCCGGUCCG	2.59	2.5371	2.566	2.1886	2.0864	2.0236	2.3893	2.31175	2.2948	2.33195
CUGACACCC	2.2948	2.179	2.7967	2.1538	2.4768	2.0887	2.2243	2.3279	2.4427	2.33163
CGUCGGGGG	2.0636	2.624	2.306	2.0796	2.6163	2.2953	2.0716	2.62015	2.30065	2.3308
GGAGAGAGA	2.2212	2.0104	1.9385	2.4253	2.7279	2.6603	2.32325	2.36915	2.2994	2.3306
CUUGACCCC	2.291	2.296	2.6582	2.3723	2.1546	2.2092	2.33165	2.2253	2.4337	2.33022
ACACCCGUG	2.3239	2.269	2.6107	2.3334	2.1311	2.3078	2.32865	2.20005	2.45925	2.32932
AGACCCGAG	2.8086	2.3339	2.3425	2.3707	2.0931	2.0084	2.58965	2.2135	2.17545	2.3262
CGCCGAGAA	2.3432	2.6679	2.3775	2.2556	2.0608	2.2513	2.2994	2.36435	2.3144	2.32605
ACCCGCGAA	2.5668	2.217	2.5605	2.3626	2.251	1.9932	2.4647	2.234	2.27685	2.32518
GAGACCCGA	2.5938	2.3811	2.5374	2.3106	2.0995	2.0232	2.4522	2.2403	2.2803	2.32427
CGAGACCCG	2.3168	2.661	2.5579	2.2755	2.0931	2.034	2.29615	2.37705	2.29595	2.32305
AGGCCCGAG	2.309	2.5881	2.4488	2.3835	2.4703	1.7375	2.34625	2.5292	2.09315	2.32287
CCCCGAGCC	2.4685	2.5812	2.3697	2.1662	2.1367	2.2148	2.31735	2.35895	2.29225	2.32285
GCACCUGGG	2.4685	2.2889	2.5191	2.5799	1.9416	2.1352	2.5242	2.11525	2.32715	2.3222
UUGACCCCG	2.4113	2.1947	2.6395	2.2652	2.3111	2.1088	2.33825	2.2529	2.37415	2.32177
UACACCCGA	2.2131	2.2634	2.5825	2.5815	2.1292	2.1607	2.3973	2.1963	2.3716	2.32173
GCACCCUGG	2.2473	2.3614	2.5249	2.5156	2.245	2.0343	2.38145	2.3032	2.2796	2.32142
CCCCGUGGG	2.4737	2.5177	2.3374	2.0852	2.5077	2.0008	2.27945	2.5127	2.1691	2.32042
CAGGCCCGG	2.729	2.4581	2.2735	2.5289	2.0538	1.8778	2.62895	2.25595	2.07565	2.32018
GGGGGAAGG	1.9319	2.0905	2.2034	2.8287	2.5253	2.3402	2.3803	2.3079	2.2718	2.32
GCCCGGAAG	2.3937	2.4966	2.2609	2.1741	2.0614	2.5318	2.2839	2.279	2.39635	2.31975
CCGCUGGGG	2.6021	2.5627	2.0503	2.2852	2.2138	2.204	2.44365	2.38825	2.12715	2.31968
CACCCGCGG	2.4175	2.4123	2.3899	2.6219	1.9775	2.0831	2.5197	2.1949	2.2365	2.31703
UGCGCCCGG	2.4554	2.4311	2.306	2.3766	2.0183	2.3144	2.416	2.2247	2.3102	2.31697
GAGGAGGCG	2.1458	2.4629	2.4346	2.2805	2.3547	2.221	2.21315	2.4088	2.3278	2.31658
CUGCCCGGG	2.4208	2.6073	2.3993	2.3443	2.1158	2.0084	2.38255	2.36155	2.20385	2.31598
GACGCUCGA	2.2334	2.3636	2.4736	2.5623	2.308	1.9366	2.39785	2.3358	2.2051	2.31292
GGGGCGAAG	2.2726	1.9294	2.7029	2.2663	2.5565	2.1346	2.26945	2.24295	2.41875	2.31038
ACCUGGGAA	2.3289	2.2747	2.2326	2.3297	2.5613	2.1282	2.3293	2.418	2.1804	2.30923
GCCCGCGAA	2.4502	2.3951	2.39	2.3964	2.2384	1.9816	2.4233	2.31675	2.1858	2.30862
AAACACCCG	2.3132	2.268	2.4702	2.3878	2.2658	2.1448	2.3505	2.2669	2.3075	2.3083
CCUUGACGC	1.9557	2.0318	2.6441	2.0731	2.5253	2.6196	2.0144	2.27855	2.63185	2.30827
CACACCCGG	2.6072	2.3916	2.6257	2.173	2.0284	2.0219	2.3901	2.21	2.3238	2.30797
AGGCCCGGG	2.643	2.0873	2.4572	2.3091	2.0098	2.337	2.47605	2.04855	2.3971	2.30723
ACCGGGAAG	2.3687	2.2756	2.3206	2.3496	2.1882	2.337	2.35915	2.2319	2.3288	2.30662
GCCCCGAGG	2.4293	2.6047	2.3731	2.3554	2.037	2.0371	2.39235	2.32085	2.2051	2.3061
GGUUGCUAG	2.4779	2.1423	2.5825	2.4279	2.1833	2.0222	2.4529	2.1628	2.30235	2.30602
GACGCCCGC	2.2668	2.3437	2.7658	2.1626	2.0623	2.2328	2.2147	2.203	2.4993	2.30567
CGGCACCCA	2.5077	2.2025	2.4195	2.2918	2.2138	2.1982	2.39975	2.20815	2.30885	2.30558
ACCCGGGCU	2.1297	2.296	2.4097	2.5951	2.1931	2.2092	2.3624	2.24455	2.30945	2.30547
GCACUCGGG	2.3233	2.6536	2.3849	2.2543	2.2316	1.9847	2.2888	2.4426	2.1848	2.3054
GAGCCCGAG	2.4484	2.3586	2.5271	2.3694	2.2079	1.9202	2.4089	2.28325	2.22365	2.30527
GACCCCUGG	2.3814	2.5169	2.2723	2.5164	2.0746	2.0698	2.4489	2.29575	2.17105	2.30523
AUCCCGAGG	2.4631	2.5211	2.2966	2.1669	2.2367	2.1423	2.315	2.3789	2.21945	2.30445
GCACCCGUU	2.6844	2.161	2.6238	2.048	2.2044	2.1024	2.3662	2.1827	2.3631	2.304
GGCGGAGGU	2.9097	2.3019	2.3014	2.2475	2.0248	2.0258	2.5786	2.16335	2.1636	2.30185
ACUCGAGAG	2.1365	2.3031	2.2228	2.6424	2.4786	2.0154	2.38945	2.39085	2.1191	2.2998
AGCCCGGGC	2.5008	2.2722	2.5174	2.3067	2.247	1.9375	2.40375	2.2596	2.22745	2.29693
CCCCGGGGG	2.5453	2.658	2.3538	2.1033	2.1768	1.9441	2.3243	2.4174	2.14895	2.29688
GUGAGGUGG	1.9852	2.1352	2.3865	2.2918	2.417	2.5631	2.1385	2.2761	2.4748	2.29647
GACACCCGU	2.1776	2.3902	2.7302	2.1606	2.0931	2.2153	2.1691	2.24165	2.47275	2.2945
CUCGCCCGA	2.2074	2.545	2.578	2.1905	2.1246	2.1197	2.19895	2.3348	2.34885	2.2942
GGCUCCCGG	2.2409	2.4139	2.528	2.522	2.2823	1.7776	2.38145	2.3481	2.1528	2.29412
CAUCCGAGA	2.1011	2.5075	2.4543	2.3878	2.2807	2.0311	2.24445	2.3941	2.2427	2.29375
GACGCCCAG	2.1866	2.6112	2.4323	2.0796	2.1367	2.2985	2.1331	2.37395	2.3654	2.29082
CCCACCCGA	2.3878	2.3057	2.683	2.2427	1.9084	2.2158	2.31525	2.10705	2.4494	2.29057
CGGGAAGAA	2.2484	2.2544	2.308	2.5197	2.4225	1.9736	2.38405	2.33845	2.1408	2.28777
CUCUGGGGG	2.4052	2.3064	2.404	2.3652	2.1333	2.1011	2.3852	2.21985	2.25255	2.28587
GGGAAGUGG	2.3259	2.2042	2.2749	2.4242	1.9466	2.5386	2.37505	2.0754	2.40675	2.28573
AGCACCCGU	2.4293	2.2467	2.592	2.2918	2.1014	2.053	2.36055	2.17405	2.3225	2.2857
GAGGGGAGG	2.2658	2.114	2.3748	2.3637	2.3206	2.2703	2.31475	2.2173	2.32255	2.28487
CCCCGAGAG	2.2384	2.6141	2.3977	2.1706	2.1099	2.1638	2.2045	2.362	2.28075	2.28242
GGGGGGGCU	1.8715	2.5741	2.5505	2.1495	2.1854	2.3628	2.0105	2.37975	2.45665	2.2823
GACGCUCGC	2.2106	2.3142	2.2188	2.4609	2.3977	2.0863	2.33575	2.35595	2.15255	2.28142
UCCCGAGAA	2.3102	2.6493	2.3715	2.1767	2.0931	2.0856	2.24345	2.3712	2.22855	2.28107
CCCAGAGAA	2.4626	2.3487	2.2404	2.4335	2.2118	1.9884	2.44805	2.28025	2.1144	2.2809
CACCCGUGA	2.3862	2.4401	2.4776	2.3469	2.0931	1.9414	2.36655	2.2666	2.2095	2.28088
CCUGGGAUC	2.3542	2.4086	2.4049	2.4695	2.0059	2.0418	2.41185	2.20725	2.22335	2.28082
[truncated: 1,331 more rows]

## Sheet: Pfalciparum_IESI2
P_falciparum	Replicate_1			Replicate_2
[truncated: 2,077 more rows]
